# Supplementary material for: Virus Adaptation by Manipulation of Host's Gene Expression
Source: PLoS One. 2008 Jun 11;3(6):e2397. doi: 10.1371/journal.pone.0002397 (PMC2398778; doi:10.1371/journal.pone.0002397)
Supplement: Table S1 — Gene expression data from DNA microarray analysis. Mock, control non-infected plants; TEV, plants infected with the ancestral virus; TEV-At17, plants infected with the evolved virus. A total of 13,722 spots were considered to give high quality expression data. Median, mean and standard deviation were calculated for each group of samples and all data were normalized by the median expression in the control plants. Gene name and annotation are included. (9.36 MB XLS) [file pone.0002397.s002.xls]

## Sheet: Hoja1
Oligo ID	Gene AGI	Mock 1	Mock 2	Mock 3	Mock 4	Mock 5	TEV 1	TEV 2	TEV 3	TEV 4	TEV 5	TEV-At 1	TEV-At 2	TEV-At 3	TEV-At 4	TEV-At 5		Mock Median	Mock Mean	Mock SD		TEV Median	TEV Mean	TEV SD		TEV-At Median	TEV-At Mean	TEV-At SD		Gene AGI	Annotation
A000001_01	At1g58360	0.465	0.024	-0.854	0	-0.069	0.154	0.001	-0.038	0.021	-1.971	-0.348	0.068	-0.142	-0.202	-0.118		0	-0.0868	0.477809		0.001	-0.3666	0.899787		-0.142	-0.1484	0.150422		At1g58360	amino acid permease I (AAP1) identical to amino acid permease I GI:22641 from [Arabidopsis thaliana]
A000002_01	At1g26110	0	0.064	-0.076	0.66	-0.074	0.087	0.003	0.216	-0.06	-0.616	0.441	0.573	0.239	0.265	0.379		0	0.1148	0.310263		0.003	-0.074	0.320121		0.379	0.3794	0.136084		At1g26110	expressed protein
A000003_01	At4g04780	0	0.085	0.704	-0.223	-0.006	0.034	0.083	-0.028	-0.172	0.421	-0.098	-0.044	0.141	0.143	0.085		0	0.112	0.349959		0.034	0.0676	0.219548		0.085	0.0454	0.110441		At4g04780	expressed protein very low similarity to SP|Q13503 RNA polymerase II holoenzyme component SRB7 (RNAPII complex component SRB7) {Homo sapiens}
A000005_01	At1g13270	0.479	0.378	-0.045	0	-0.141	0.988	1.251	0.886	0.884	0.428	1.241	1.276	1.174	1.211	1.127		0	0.1342	0.275764		0.886	0.8874	0.297232		1.211	1.2058	0.0579111		At1g13270	metallopeptidase M24 family protein similar to SP|Q01662 Methionine aminopeptidase 1 precursor (EC 3.4.11.18) {Saccharomyces cerevisiae}; contains Pfam profile PF00557: metallopeptidase family M24
A000006_01	At1g09640	0.003	0.141	-1.482	0	-0.181	0.333	0.197	0.005	-0.137	-2.406	0.42	0.664	0.165	0.348	0.053		0	-0.3038	0.668488		0.005	-0.4016	1.13478		0.348	0.33	0.236608		At1g09640	elongation factor 1B-gamma, putative / eEF-1B gamma, putative Similar to elongation factor 1-gamma (gb|EF1G_XENLA). ESTs gb|T20564,gb|T45940,gb|T04527 come from this gene
A000012_01	At1g54610	-0.136	-0.115	0.227	0.105	0	0.05	-0.036	-0.151	-0.124	0.259	0.103	0.015	-0.042	0.05	0.067		0	0.0162	0.152449		-0.036	-0.0004	0.165116		0.05	0.0386	0.0550845		At1g54610	protein kinase family protein contains Pfam domain, PF00069: Protein kinase domain
A000014_01	At1g33640	0	-0.475	-0.791	0.467	0.089	-0.256	0.035	0.136	0.671	-0.281	0.73	-0.367	0.649	0.761	-0.097		0	-0.142	0.494089		0.035	0.061	0.385958		0.649	0.3352	0.528092		At1g33640	hypothetical protein contains similarity to epidermal growth factor receptor-like protein GB:AAB31972 GI:9256501 from (Xiphophorus maculatus)
A000016_01	At1g09700	-0.044	-0.012	0.397	0	0.001	0.221	0.057	0.085	-0.04	-0.297	0.112	0.174	0.018	-0.007	0.237		0	0.0684	0.184592		0.057	0.0052	0.192995		0.112	0.1068	0.102872		At1g09700	double-stranded RNA-binding domain (DsRBD)-containing protein contains Pfam profile PF00035: Double-stranded RNA binding motif; supporting cDNA gi|12247456|gb|AF276440.1|AF276440
A000017_01	At1g80040	0.127	-0.043	-0.484	0.109	0	0.294	0.229	0.032	0.027	-0.53	0.423	0.429	-0.014	-0.019	0.263		0	-0.0582	0.248585		0.032	0.0104	0.324418		0.263	0.2164	0.222795		At1g80040	expressed protein
A000021_01	At1g55530	-0.181	0	0.166	-0.128	0.006	0.215	0.062	-0.2	0.109	0.105	0.201	0.415	-0.236	0.083	0.067		0	-0.0274	0.135077		0.105	0.0582	0.154951		0.083	0.106	0.23639		At1g55530	zinc finger (C3HC4-type RING finger) family protein contains Pfam domain, PF00097: Zinc finger, C3HC4 type (RING finger)
A000022_01	At1g12140	0.042	-0.252	0.049	0	-0.036	-0.11	-0.289	-0.188	0.159	-0.147	-0.371	-0.189	-0.107	-0.242	-0.26		0	-0.0394	0.123696		-0.147	-0.115	0.16713		-0.242	-0.2338	0.0970345		At1g12140	flavin-containing monooxygenase family protein / FMO family protein similar to flavin-containing monooxygenase [Cavia porcellus] GI:191259; contains Pfam profile PF00743: Flavin-binding monooxygenase-like
A000025_01	At1g11650	0	-0.165	-0.713	0.107	0.131	0.07	0.032	0.115	-0.029	-0.019	0.522	0.401	0.229	0.266	0.361		0	-0.128	0.347233		0.032	0.0338	0.0604955		0.361	0.3558	0.116012		At1g11650	RNA-binding protein 45 (RBP45), putative similar to gb|U90212 DNA binding protein ACBF from Nicotiana tabacum and contains 3 PF|00076 RNA recognition motif domains.
A000026_01	At1g12120	0.031	0.117	-0.675	-0.11	0	-0.079	0.01	-0.115	-0.311	-1.203	0.043	0.025	-0.129	0.039	-0.213		0	-0.1274	0.31671		-0.115	-0.3396	0.496703		0.025	-0.047	0.117218		At1g12120	expressed protein contains Pfam domain PF05904: Plant protein of unknown function (DUF863)
A000027_01	At1g75860	0	-0.095	-0.078	0.029	0.041	0.727	0.556	0.55	1.291	0.842	0.278	0.203	0.359	0.333	0.34		0	-0.0206	0.062268		0.727	0.7932	0.304129		0.333	0.3026	0.0633032		At1g75860	expressed protein
A000029_01	At1g78580	0.166	-0.051	0.084	0	-0.317	0.129	-0.401	-0.516	-0.404	-0.586	-1.371	-1.193	-1.297	-1.332	-0.933		0	-0.0236	0.183655		-0.404	-0.3556	0.281981		-1.297	-1.2252	0.176236		At1g78580	alpha, alpha-trehalose-phosphate synthase, UDP-forming, putative / trehalose-6-phosphate synthase, putative / UDP-glucose-glucosephosphate glucosyltransferase, putative similar to trehalose-6-phosphate synthase SL-TPS/P [Selaginella lepidophylla] GI:41003
A000031_01	At1g19670	0.398	0	-0.171	0.232	-0.504	-0.6	-0.36	-0.787	-0.025	-1.423	-1.421	-1.049	-1.366	-1.479	-1.466		0	-0.009	0.35181		-0.6	-0.639	0.522714		-1.421	-1.3562	0.177343		At1g19670	coronatine-responsive protein / coronatine-induced protein 1 (CORI1) identical to coronatine-induced protein 1 (CORI1) GI:30912637 from [Arabidopsis thaliana]
A000034_01	At1g52200	0.045	0	-0.638	-0.262	0.579	0.616	0.459	1.575	2.116	1.568	1.235	1.025	1.136	1.05	1.773		0	-0.0552	0.446576		1.568	1.2668	0.704083		1.136	1.2438	0.307076		At1g52200	expressed protein similar to PGPS/D12 [Petunia x hybrida] GI:4105794; contains Pfam profile PF04749: Protein of unknown function, DUF614
A000038_01	At1g54060	0.023	-0.118	0.585	-0.021	0	0.144	0.303	0.237	-0.096	0.221	0.201	0.324	0.045	-0.093	0.179		0	0.0938	0.279789		0.221	0.1618	0.154818		0.179	0.1312	0.159707		At1g54060	expressed protein similar to 6b-interacting protein 1 (NtSIP1) [Nicotiana tabacum] GI:18149189
A000039_01	At1g26740	0.085	0.205	-0.422	0	-0.109	0.463	0.352	0.124	0.358	-0.184	0.562	0.555	0.404	0.454	0.548		0	-0.0482	0.238537		0.352	0.2226	0.258803		0.548	0.5046	0.0714129		At1g26740	expressed protein similar to 50S ribosomal protein L32 (SP:P80339) {Thermus thermophilus}
A000040_01	At1g48160	0	-0.049	0.349	-0.019	0.181	0.255	0.316	0.228	0.152	0.514	0.423	0.307	0.22	0.013	0.512		0	0.0924	0.169289		0.255	0.293	0.136858		0.307	0.295	0.192851		At1g48160	signal recognition particle 19 kDa protein, putative / SRP19, putative similar to signal recognition particle 19 kDa protein subunit SRP19 GI:624221 [Oryza sativa (japonica cultivar-group)]; contains Pfam profile: PF01922 SRP19 protein
A000041_01	At1g01550	0	-0.115	-1.236	0.147	0.135	0.053	0.06	0.282	0.217	-0.714	0.163	0.239	-0.019	-0.089	0.297		0	-0.2138	0.581421		0.06	-0.0204	0.40023		0.163	0.1182	0.166076		At1g01550	expressed protein
A000042_01	At1g13570	0	0.139	0.071	-0.314	-0.12	0.278	0.282	0.088	-0.039	-0.399	0.042	0.381	0.281	0.211	0.457		0	-0.0448	0.178412		0.088	0.042	0.281271		0.281	0.2744	0.160296		At1g13570	F-box family protein contains F-box domain Pfam:PF00646 ; similar to SKP1 interacting partner 2 (SKIP2) TIGR_Ath1:At5g67250
A000045_01	At1g65500	0.446	0	0.712	-0.942	-0.187	0.921	0.738	1.261	1.721	2.489	0.382	1.032	1.08	0.931	1.37		0	0.0058	0.63797		1.261	1.426	0.702244		1.032	0.959	0.361457		At1g65500	expressed protein
A000046_01	At1g48030	-0.078	0	-1.163	0.036	0.062	-0.771	-0.629	-0.53	-0.661	-1.496	-0.669	-0.682	-0.539	-0.782	-0.732		0	-0.2286	0.525001		-0.661	-0.8174	0.388975		-0.682	-0.6808	0.0909819		At1g48030	dihydrolipoamide dehydrogenase 1, mitochondrial / lipoamide dehydrogenase 1 (MTLPD1) identical to GB:AAF34795 [gi:12704696] from [Arabidopsis thaliana]
A000050_01	At1g65590	0.092	0	-1.376	0.093	-0.197	-0.518	-0.224	-0.391	-0.69		-0.598	-0.502	-0.819	-0.568			0	-0.2776	0.625298		-0.455	-0.45575	0.197188		-0.583	-0.62175	0.137478		At1g65590	glycosyl hydrolase family 20 protein contains Pfam PF00728: Glycosyl hydrolase family 20, catalytic domain; contains Pfam PF02838: Glycosyl hydrolase family 20, domain 2; similar to Beta-hexosaminidase beta chain precursor (EC 3.2.1.52) (N-acetyl-beta- gl
A000051_01	At1g67140	-0.188	-0.153	0.446	0	0.013	-0.33	-0.367	-0.227	-0.022	1.057	-0.446	-0.624	-0.286	-0.044	-0.149		0	0.0236	0.252514		-0.227	0.0222	0.593799		-0.286	-0.3098	0.231487		At1g67140	expressed protein
A000052_01	At1g04810	-0.41	-0.311	0.081	0.266	0	-0.365	-0.635	-0.215	-0.192	0.542	-0.479	-0.346	-0.312	-0.206	0.013		0	-0.0748	0.280251		-0.215	-0.173	0.436938		-0.312	-0.266	0.183933		At1g04810	26S proteasome regulatory subunit, putative contains similarity to 26S proteasome regulatory subunit S1 SP:O88761, GI:3288594 from [Rattus norvegicus]
A000055_01	At1g56150	0	-0.031	-0.439	0.176	0.172	0.161	0.196	0.914	0.805	0.935	0.251	0.27	0.459	0.223	0.419		0	-0.0244	0.250632		0.805	0.6022	0.390115		0.27	0.3244	0.106882		At1g56150	auxin-responsive family protein similar to SP:P33082 Auxin-induced protein X15. [Soybean] {Glycine max}
A000058_01	At1g44000	0.123	-0.167	-0.686	0	0.113	-0.761	-0.709	-1.024	-1.291	-1.693	-0.91	-0.711	-0.864	-0.913	-0.834		0	-0.1234	0.335502		-1.024	-1.0956	0.406697		-0.864	-0.8464	0.0825791		At1g44000	expressed protein
A000059_01	At1g12110	0.328	0	-0.031	0.461	-0.02	-0.181	-0.103	0.292	0.174	0.007	-0.916	-1.049	-0.47	-0.54	-0.627		0	0.1476	0.230509		0.007	0.0378	0.194817		-0.627	-0.7204	0.250103		At1g12110	nitrate/chlorate transporter (NRT1.1) (CHL1) identical to nitrate/chlorate transporter SP:Q05085 from [Arabidopsis thaliana]; contains Pfam profile: PF00854 POT family
A000061_01	At1g76590	0	0.142	-0.355	0.283	-0.046	0.335	0.97	1.153	0.418	0.629	1.249	1.26	1.017	1.424	1.786		0	0.0048	0.238893		0.629	0.701	0.352099		1.26	1.3472	0.284922		At1g76590	zinc-binding family protein similar to zinc-binding protein [Pisum sativum] GI:16117799; contains Pfam profile PF04640 : Protein of unknown function, DUF597
A000062_01	At1g76570	0.041	0.03	-1.043	-0.213	0	-1.081	-0.929	-0.468	-0.499	-1.201	-0.907	-0.988	-0.622	-0.611	-0.796		0	-0.237	0.462319		-0.929	-0.8356	0.335742		-0.796	-0.7848	0.168121		At1g76570	chlorophyll A-B binding family protein similar to chlorophyll A-B binding protein GB:P12470 [Nicotiana plumbaginifolia]; contains Pfam profile: PF00504 Chlorophyll A-B binding proteins
A000065_01	At1g68110	-0.165	-0.347	0	0.234	0.41	-0.571	-0.176	-0.105	0.511	0.068	0.223	-0.727	-0.272		-0.325		0	0.0264	0.302905		-0.105	-0.0546	0.393345		-0.299	-0.27525	0.389366		At1g68110	epsin N-terminal homology (ENTH) domain-containing protein / clathrin assembly protein-related similar to clathrin assembly protein AP180 (GI:6492344) [Xenopus laevis]; contains Pfam profile: PF01417 ENTH domain, suggesting involvement in endocytosis or c
A000067_01	At1g67940	0	0.096	-0.328	-0.187	0.098	0.298	0.371	0.434	0.63	0.513	0.106	0.702	0.615	0.597	0.465		0	-0.0642	0.187593		0.434	0.4492	0.12842		0.597	0.497	0.234443		At1g67940	ABC transporter family protein similar to ABC transporters: GB:BAA77876 [Escherichia coli], GB:P07655 [Escherichia coli]; contains Pfam profile: PF00005 ABC transporter
A000069_01	At1g70070	-0.019	-0.211	0.453	0.103	0	-0.34	-0.096	-0.003	-0.04	0.725	-0.303	-0.4	-0.09	0.035	-0.116		0	0.0652	0.244665		-0.04	0.0492	0.399983		-0.116	-0.1748	0.17451		At1g70070	DEAD/DEAH box helicase, putative similar to SP|P35207 Antiviral protein SKI2 {Saccharomyces cerevisiae}; contains Pfam profiles PF00270: DEAD/DEAH box helicase, PF00271: Helicase conserved C-terminal domain
A000072_01	At1g70020	-0.026	0.026	0.615	-0.176		0.005	-0.149	0.115	-0.096	0.555	-0.156	-0.21	-0.044	-0.109	0.039		0	0.10975	0.34755		0.005	0.086	0.280941		-0.109	-0.096	0.0970747		At1g70020	hypothetical protein
A000073_01	At1g68020	-0.186	0	-0.297	0.179	0.049	-0.167	-0.208	0.132	-0.395	-0.621	-0.101	-0.243	-0.189	0.01	-0.215		0	-0.051	0.189896		-0.208	-0.2518	0.279833		-0.189	-0.1476	0.102916		At1g68020	glycosyl transferase family 20 protein / trehalose-phosphatase family protein similar to SP|Q00764 Alpha,alpha-trehalose-phosphate synthase [UDP-forming] 56 kDa subunit (EC 2.4.1.15) (Trehalose-6-phosphate synthase) {Saccharomyces cerevisiae}; contains Pf
A000074_01	At1g69980	0.106	0.033	0	-0.179	-0.169	0.124	0.171	0.232	0.12	-0.168	0.102	0.191	0.011	0.104	-0.038		0	-0.0418	0.12668		0.124	0.0958	0.154254		0.102	0.074	0.0892833		At1g69980	expressed protein
A000075_01	At1g67960	0.061	-0.14	0.276	-0.085	0	-0.124	-0.347	-0.172	-0.176	0.364	-0.219	-0.083	-0.342	-0.251	0.106		0	0.0224	0.16141		-0.172	-0.091	0.268065		-0.219	-0.1578	0.174318		At1g67960	expressed protein AT-AC non-consensus splice sites at intron 6
A000080_01	At1g53050	-0.059	0	0.684	-0.048	0.076	0.153	0.09	-0.084	-0.12	0.481	-0.294	-0.409	-0.136	-0.053	-0.355		0	0.1306	0.313901		0.09	0.104	0.23992		-0.294	-0.2494	0.150038		At1g53050	protein kinase family protein contains Pfam domain, PF00069: Protein kinase domain
A000084_01	At1g72690	-0.162	0	0.946	-0.123	0.054	0.166	0.243	0.315	0.173	0.854	0.025	-0.037	0.161	-0.05	0.141		0	0.143	0.457428		0.243	0.3502	0.288043		0.025	0.048	0.0984581		At1g72690	expressed protein
A000088_01	At1g09060	-0.037	0	0.482	0.228	-0.234	0.175	-0.051	-0.041	0.193	0.853	0.065	0.092	0.029	-0.056	-0.052		0	0.0878	0.274722		0.175	0.2258	0.369065		0.029	0.0156	0.0673669		At1g09060	transcription factor jumonji (jmjC) domain-containing protein contains Pfam domain, PF02373: jmjC domain
A000089_01	At1g09020	-0.002	0.102	-0.462	0.542	0	0.178	0.198	0.289	0.141		0.144	0.262	0.255	0.181	0.562		0	0.036	0.357469		0.188	0.2015	0.0629312		0.255	0.2808	0.164899		At1g09020	protein kinase, putative similar to protein kinase AKINbetagamma-2 [Zea mays] GI:11139548, AKINbetagamma-1 [Zea mays] GI:11139546; contains Pfam profile PF00571: CBS domain
A000090_01	At1g76230	-0.275	0.275	0.698		-0.357	-0.148	0.622	0.294	0.248	0.743	0.711	0.981	1.192	0.734	0.544		0	0.08525	0.495591		0.294	0.3518	0.349986		0.734	0.8324	0.254455		At1g76230	expressed protein
A000091_01	At1g73200	-0.055	-0.276	0.313	0.175	0	0.477	0.24	0.261	0.491	0.649	0.163	0.191	0.125	-0.011	0.038		0	0.0314	0.225203		0.477	0.4236	0.172008		0.125	0.1012	0.0851951		At1g73200	expressed protein
A000097_01	At1g49350	0	-0.115	-0.131	0.059	0.215	0.262	0.203	0.03	-0.057	0.456	0.03	0.474	0.202	0.094	0.542		0	0.0056	0.141364		0.203	0.1788	0.201303		0.202	0.2684	0.228466		At1g49350	pfkB-type carbohydrate kinase family protein contains Pfam profile: PF00294 pfkB family carbohydrate kinase
A000099_01	At1g05320	-0.496	0.123	0.797	0	-0.697	-0.411	-0.072	0.039	-0.123	-0.254	-0.526	-0.41	-0.186	0.042	-0.718		0	-0.0546	0.584649		-0.123	-0.1642	0.173539		-0.41	-0.3596	0.295846		At1g05320	myosin-related similar to non-muscle myosin II heavy chain (GI:19879404) [Loligo pealei]; ESTs gb|AA042402,gb|ATTS1380 come from this gene
A000104_01	At1g12570	-0.353	0.457	1.147	-0.057	0	1.331	0.922	-1.788	-0.643	-0.741	-0.024	-0.431	-1.247	-0.175	-1.136		0	0.2388	0.584634		-0.643	-0.1838	1.28571		-0.431	-0.6026	0.558308		At1g12570	glucose-methanol-choline (GMC) oxidoreductase family protein similar to mandelonitrile lyase from Prunus serotina [SP|P52706, SP|P52707]; contains Pfam profile PF00732 GMC oxidoreductase
A000107_01	At1g05170	0.055	0	0.592	-0.196	-0.217	-0.474	-0.358	-0.236	-0.047	0.147	-0.663	-0.468	-0.618	-0.461	-0.901		0	0.0468	0.327125		-0.236	-0.1936	0.247462		-0.618	-0.6222	0.179704		At1g05170	galactosyltransferase family protein
A000111_01	At1g49300	-0.026	0.002	0.348	-0.021	0	-0.009	0.032	0.217	0.452	0.457	0.178	0.101	0.359	0.242	0.304		0	0.0606	0.161139		0.217	0.2298	0.222096		0.242	0.2368	0.101704		At1g49300	Ras-related GTP-binding protein, putative contains Pfam profile: PF00071 Ras family
A000113_01	At1g43900	0	0.032	0.477	-0.36	-0.111	-0.159	-0.29	-0.283	-0.039	0.179	-0.29	-0.266	0.042	0.027	-0.346		0	0.0076	0.304214		-0.159	-0.1184	0.195537		-0.266	-0.1666	0.185935		At1g43900	protein phosphatase 2C, putative / PP2C, putative similar to protein phosphatase type 2C GI:4336436 from [Lotus japonicus]
A000118_01	At1g61170	-0.004	0.004	-0.885		0.901	0.064	-0.052	0.033	0.232		-0.316	-0.536	-0.542	-0.47	0.059		0	0.004	0.729153		0.049	0.06925	0.119067		-0.47	-0.361	0.251839		At1g61170	expressed protein
A000124_01	At1g23040	-0.075	0	-0.203	0.189	0.075	-0.402	-0.406	-0.177	0.065	0.079	-0.172	-0.375	-0.122	-0.094	-0.423		0	-0.0028	0.148443		-0.177	-0.1682	0.238106		-0.172	-0.2372	0.151277		At1g23040	hydroxyproline-rich glycoprotein family protein contains proline-rich domains, INTERPRO:IPR000694
A000129_01	At1g22590	0.445	0	0.393	-0.029	-0.393	-1.064		-0.585	-0.737	-0.703	-1.25	-1.282	-0.667	-0.833	-1.086		0	0.0832	0.343931		-0.72	-0.77225	0.205117		-1.086	-1.0236	0.26712		At1g22590	MADS-box family protein similar to putative DNA-binding protein GI:6714399 from [Arabidopsis thaliana]; MADS-box protein AGL87
A000134_01	At1g43910	0	0.095	0.805	-0.867	-1.156	1.56	0.883	0.439	1.394	1.111	1.246	1.483	1.328	1.695	0.991		0	-0.2246	0.789438		1.111	1.0774	0.441479		1.328	1.3486	0.263099		At1g43910	AAA-type ATPase family protein contains Pfam profile: ATPase family PF00004
A000151_01	At1g76980	0.659	0.189	-0.189		-0.575	1.447	1.039	1.327	2.046	0.986	1.233	1.755	1.402	1.345	1.025		0	0.021	0.527442		1.327	1.369	0.424784		1.345	1.352	0.267417		At1g76980	expressed protein
A000153_01	At1g09240	-0.099	0	-0.002	1.601	0.166	0.953	0.289	-0.367	0.576	1.105	2.053	1.294	2.095	1.584	1.418		0	0.3332	0.715096		0.576	0.5112	0.585789		1.584	1.6888	0.366682		At1g09240	nicotianamine synthase, putative similar to nicotianamine synthase [Lycopersicon esculentum][GI:4753801], nicotianamine synthase 2 [Hordeum vulgare][GI:4894912]
A000159_01	At1g48490	-0.156	0.122	-0.221	0.489	0	-0.234	-0.318	0.164	0.399	-0.122	0.077	0.112	0.326	0.389	0.387		0	0.0468	0.281172		-0.122	-0.0222	0.297656		0.326	0.2582	0.152071		At1g48490	protein kinase, putative similar to incomplete root hair elongation (IRE) [Arabidopsis thaliana] gi|6729346|dbj|BAA89783
A000162_01	At1g73440	0	0.058	-0.256	-0.054	0.141	-0.053	0.054	0.163	-0.127	-0.302	0.233	-0.051	-0.023	-0.122	0.095		0	-0.0222	0.149359		-0.053	-0.053	0.177188		-0.023	0.0264	0.139502		At1g73440	calmodulin-related low similarity to calmodulin 8 [Arabidopsis thaliana] GI:5825600; contains Pfam profiles PF02809: Ubiquitin interaction motif, PF00036: EF hand
A000163_01	At1g68400	-0.04	-0.304	0.57	0	0.139	0.397	0.152	0.574	-0.169	0.928	0.008	-0.696	-0.405	-0.382	-0.024		0	0.073	0.320777		0.397	0.3764	0.415797		-0.382	-0.2998	0.293941		At1g68400	leucine-rich repeat transmembrane protein kinase, putative similar to receptor kinase GB:AAA33715 from [Petunia integrifolia]
A000166_01	At1g80620	0.268	0	-0.253	0.232	-0.652	0.532	0.453	0.122	0.148	-0.796	0.882	0.886	0.531	0.275	0.697		0	-0.081	0.38143		0.148	0.0918	0.528323		0.697	0.6542	0.258083		At1g80620	ribosomal protein S15 family protein similar to ribosomal protein S15 GB:AAD36415 from [Thermotoga maritima]
A000167_01	At1g24310	0.204	0.406	0	-0.002	-0.12	0.303	0.44	0.539	0.5		0.177	0.454	0.363	0.475	0.137		0	0.0976	0.208103		0.47	0.4455	0.103359		0.363	0.3212	0.156334		At1g24310	expressed protein
A000169_01	At1g24340	0	0.021	0.751	-0.136	-0.263	-0.235	-0.23	-0.337	-0.187	-0.489	-0.414	-0.428	-0.14	-0.182	-0.67		0	0.0746	0.395057		-0.235	-0.2956	0.121333		-0.414	-0.3668	0.21418		At1g24340	monooxygenase family protein similar to polyketide hydroxylases from several bacterial species; contains Pfam:PF01360 [Monooxygenase]
A000178_01	At1g12520	1.208	-0.201	-0.562	0	0.77	1.199	1.488	1.328	0.747	0.352	1.099	1.42	0.971	1.102	1.284		0	0.243	0.726836		1.199	1.0228	0.465468		1.102	1.1752	0.176513		At1g12520	superoxide dismutase copper chaperone, putative similar to copper chaperone for superoxide dismutase [Homo sapiens] gi|2431868|gb|AAC51764
A000179_01	At1g34150	0.003	0.045	0	-0.146	-0.232	-0.847	-0.737	-0.779	-0.924	-1.019	-1.03	-0.779	-0.567	-0.447	-1.062		0	-0.066	0.11768		-0.847	-0.8612	0.113169		-0.779	-0.777	0.273056		At1g34150	tRNA pseudouridine synthase family protein similar to pseudouridine synthase 3 [Mus musculus] GI:9652099; contains Pfam profile PF01416: tRNA pseudouridine synthase
A000180_01	At1g55460	0.118	-0.27	-0.256	0	0.042	0.071	0.244	0.038	-0.218	-0.776	-0.091	0.179	-0.493	-0.468	-0.14		0	-0.0732	0.178419		0.038	-0.1282	0.397978		-0.14	-0.2026	0.281408		At1g55460	Kin17 DNA-binding protein-related contains similarity to zinc finger protein rts2 GB:U16133 GI:563244 from [Saccharomyces cerevisiae]
A000182_01	At1g04070	-0.167	0.071	0.035	-0.244	0	0.385	0.397	0.15	0.677	1.593	0.377	0.232	0.55	0.226	0.794		0	-0.061	0.137009		0.397	0.6404	0.564303		0.377	0.4358	0.239977		At1g04070	expressed protein Contains similarity to hypothetical mitochondrial import receptor subunit gb Z98597 from S. pombe. ESTs gb|T45575 and gb|Z26435 and gb|AA394576 come from this gene
A000183_01	At1g04130	-0.053	0.001	-0.044	0.012	0	0.062	0.08	0.028	0.249	0.035	0.108	0.096	-0.068	-0.102	-0.157		0	-0.0168	0.0294907		0.062	0.0908	0.0908719		-0.068	-0.0246	0.119928		At1g04130	tetratricopeptide repeat (TPR)-containing protein contains non-consensus donor splice site AT at exon 4 and acceptor splice site at exon5; Contains similarity to serine/threonine protein phosphatase gb|X83099 from S. cerevisiae, SP|O95801 Tetratricopeptid
A000185_01	At1g75400	0.124	0.235	-0.268	0	-0.042	0.421	0.207	0.163	0.123	-0.144	0.36	0.43	0.262	0.309	0.115		0	0.0098	0.189545		0.163	0.154	0.20245		0.309	0.2952	0.118464		At1g75400	expressed protein
A000187_01	At1g10090	0	0.067	0.432	-0.016	-0.412	0.208	0.296	0.418	0.63	0.408	-0.069	0.08	0.315	0.386	-0.831		0	0.0142	0.300044		0.408	0.392	0.158625		0.08	-0.0238	0.486598		At1g10090	expressed protein
A000192_01	At1g10095	0	0.075	-0.398	-0.261	0.913	-0.248	-0.161	-0.139	-0.127		-0.01	0.207		0.113	-0.244		0	0.0658	0.510899		-0.15	-0.16875	0.0546771		0.051	0.0165	0.195077		At1g10095	protein prenyltransferase alpha subunit-related contains weak hit to Pfam profile PF01239: Protein prenyltransferase alpha subunit repeat
A000194_01	At1g50380	-0.254	0.016	0.997	0	-0.361	0.221	0.11	-0.148	-0.064	0.512	0.099	0.243	0.103	0.375	0.083		0	0.0796	0.537918		0.11	0.1262	0.259544		0.103	0.1806	0.126384		At1g50380	prolyl oligopeptidase family protein similar to oligopeptidase B [Leishmania major] GI:4581757; contains Pfam profiles PF00326: prolyl oligopeptidase family, PF02897: Prolyl oligopeptidase, N-terminal beta-propeller domain
A000195_01	At1g79160	-0.151	-0.208	0.014	0.113	0	-0.343	-0.147	-0.167	-0.495	-0.346	-0.106	-0.039	-0.391	-0.296	-0.05		0	-0.0464	0.130638		-0.343	-0.2996	0.144124		-0.106	-0.1764	0.158248		At1g79160	expressed protein
A000196_01	At1g50370	0.003	0.038	-0.81	-0.009	0	0.132	0.166	-0.109	-0.202	-2.471	0.175	0.182	-0.112	0.03	-0.131		0	-0.1556	0.366257		-0.109	-0.4968	1.11461		0.03	0.0288	0.150172		At1g50370	serine/threonine protein phosphatase, putative nearly identical to serine/threonine protein phosphatase [Arabidopsis thaliana] GI:14582206
A000197_01	At1g50170	0.048	0.045	-0.523	-0.058	0	-0.112	0.005	0.033	0.202	-0.301	-0.096	0.096	0.215	-0.039	0.07		0	-0.0976	0.241657		0.005	-0.0346	0.186465		0.07	0.0492	0.121424		At1g50170	expressed protein similar to Cbi protein (GI:3724039) [Bacillus megaterium]; similar to YlnE protein (GI:2462961) [Bacillus subtilis]; similar to NirR (GI:4433637) [Staphylococcus carnosus]
A000198_01	At1g50260	0.006	-0.243	0.057	0	-0.473	-0.85	-1.043	-1.055	-0.65	-0.592	-0.773	-0.708	-0.56	-0.425	-0.892		0	-0.1306	0.224043		-0.85	-0.838	0.215127		-0.708	-0.6716	0.182653		At1g50260	C2 domain-containing protein low similarity to CLB1 [Lycopersicon esculentum] GI:2789434; contains Pfam profile PF00168: C2 domain
A000202_01	At1g75460	0	-0.291	-1.23	0.044	0.096	-0.849	-0.802	-0.625	-0.883	-1.435	-0.954	-0.963	-0.998	-1.162	-0.657		0	-0.2762	0.553918		-0.849	-0.9188	0.305195		-0.963	-0.9468	0.182504		At1g75460	ATP-dependent protease La (LON) domain-containing protein weak similarity to SP|P36774 ATP-dependent protease La 2 (EC 3.4.21.53) {Myxococcus xanthus}; contains Pfam profile PF02190: ATP-dependent protease La (LON) domain
A000207_01	At1g79200	-0.183	-0.124	0.281	0	0.122	0.108	0.018	-0.055	-0.054	0.51	0.201	0.053	-0.081	-0.322	0.458		0	0.0192	0.187661		0.018	0.1054	0.235841		0.053	0.0618	0.29331		At1g79200	expressed protein
A000210_01	At1g17040	-0.275	0	0.574	0.023	-0.174	-0.491		-0.32		0.284	-0.464	-0.272	-0.114	-0.103	-0.154		0	0.0296	0.328453		-0.32	-0.175667	0.407161		-0.154	-0.2214	0.151254		At1g17040	transcription factor-related contains Pfam profile: PF00017 Src homology domain 2; similar to transcription factor [Danio rerio] (GI:3687402)
A000212_01	At1g17120	-0.029	0	0.225	-0.043	0.083	-0.367	-0.259	-0.2	-0.117	0.045	-0.221	-0.161	-0.003	0.048	-0.285		0	0.0472	0.110753		-0.2	-0.1796	0.155083		-0.161	-0.1244	0.142235		At1g17120	amino acid permease family protein low similarity to SP|O43246 Cationic amino acid transporter-4 (CAT-4) {Homo sapiens}; contains Pfam profile PF00324: Amino acid permease
A000217_01	At1g76360	0.185	-0.319	0	-0.016	0.066	-0.088	-0.044	0.555	0.9	0.862	-0.245	-0.458	0.184	-0.079	-0.283		0	-0.0168	0.186539		0.555	0.437	0.478514		-0.245	-0.1762	0.242251		At1g76360	protein kinase, putative similar to protein kinase APK1B, SWISS-PROT:P46573; contains protein kinase domain, Pfam:PF00069
A000220_01	At1g27000	0.004	0	0.283	-0.219	-0.363	0.203	0.112	0.257	0.423	0.535	0.219	0.201	0.645	0.646	-0.117		0	-0.059	0.246186		0.257	0.306	0.170863		0.219	0.3188	0.326812		At1g27000	bZIP family transcription factor
A000223_01	At1g12050	-0.112	0.108	-0.805	0	0.119	-0.314	-0.222	-0.035	-0.18	-1.627	-0.043	0.005	-0.055	-0.105	-0.217		0	-0.138	0.384439		-0.222	-0.4756	0.651471		-0.055	-0.083	0.0845104		At1g12050	fumarylacetoacetase, putative similar to fumarylacetoacetase (Fumarylacetoacetate hydrolase, Beta-diketonase, FAA)[Rattus norvegicus] SWISS-PROT:P25093
A000227_01	At1g31650	-0.044	-0.078	0.476	0	0.309	-0.142	-0.264	-0.338	-0.552		-0.232	0.064	-0.328	-0.408	0.065		0	0.1326	0.24605		-0.301	-0.324	0.172147		-0.232	-0.1678	0.221025		At1g31650	expressed protein contains Pfam profile PF03759: Domain of unknown function (DUF315)
A000230_01	At1g11870	-0.289	-0.113	0	0.286	0.32	-0.526	-0.524	-0.234	-0.158	0.407	-0.175	-0.352	-0.17	-0.306	0.214		0	0.0408	0.260846		-0.234	-0.207	0.381568		-0.175	-0.1578	0.222686		At1g11870	seryl-tRNA synthetase, putative / serine--tRNA ligase, putative similar to PIR|T03949 serine--tRNA ligase (EC 6.1.1.11) serS {Zea mays}; contains Pfam profiles PF00587: tRNA synthetase class II core domain (G, H, P, S and T), PF02403: Seryl-tRNA synthetas
A000231_01	At1g48700	0	0.168	0.856	-0.424	-0.405	0.29	0.275	-0.01	0.475	0.703	-0.3		0.018	-0.065	-0.58		0	0.039	0.523726		0.29	0.3466	0.264103		-0.183	-0.23175	0.268401		At1g48700	oxidoreductase, 2OG-Fe(II) oxygenase-related contains weak hit to Pfam PF03171: oxidoreductase, 2OG-Fe(II) oxygenase family
A000238_01	At1g11880	0	-0.09	0.106	0	0.074	-0.101	-0.19	-0.145	-0.13	-0.081	-0.257	-0.327	-0.136	-0.2	-0.134		0	0.018	0.0761446		-0.13	-0.1294	0.0420274		-0.2	-0.2108	0.082533		At1g11880	expressed protein contains Pfam profile PF04188: Protein of unknown function (DUF409)
A000239_01	At1g66740	0.052	0.126	-0.168	-0.206	0	-0.129	-0.115	-0.047	-0.152	-0.435	-0.049	-0.012	-0.059	-0.025	-0.141		0	-0.0392	0.142791		-0.129	-0.1756	0.150189		-0.049	-0.0572	0.0504301		At1g66740	ASF1-like anti-silencing protein, putative similar to SP|P32447 Anti-silencing protein 1 {Saccharomyces cerevisiae}; contains Pfam profile PF04729: Anti-silencing protein, ASF1-like; supporting cDNA gi|27530935|dbj|AB078339.1|
A000240_01	At1g12020	-0.07	0.188	-0.721	0	0.04	0.348	0.347	0.368	0.111	-0.036	0.138	0.448	0.176	0.222	0.918		0	-0.1126	0.352949		0.347	0.2276	0.181346		0.222	0.3804	0.323733		At1g12020	expressed protein
A000243_01	At1g66750	0.009	0	0.352	-0.019	-0.061	-0.051	-0.111	-0.134	0.022	-0.093	0.062	-0.036	0.011	0.075	-0.089		0	0.0562	0.167537		-0.093	-0.0734	0.0613865		0.011	0.0046	0.0683762		At1g66750	cell division protein kinase, putative similar to cell division protein kinase 7 [Homo sapiens] SWISS-PROT:P50613
A000244_01	At1g66850	-0.526	1.644	2.372	0	-0.144	3.754	2.158	-0.505	1.603	0.018	1.745	2.277	0.371	0.371	0.313		0	0.6692	1.26366		1.603	1.4056	1.70996		0.371	1.0154	0.928415		At1g66850	protease inhibitor/seed storage/lipid transfer protein (LTP) family protein similar to GP|3062791 Lipid transfer protein {Brassica rapa}; contains Pfam profile: PF00234: protease inhibitor/seed storage/LTP family
A000246_01	At1g76440	0.067	-0.15	0	-0.082	0.147	0.178	0.004	0.086	-0.216	0.172	0.006	-0.029	-0.234	-0.4	0.075		0	-0.0036	0.117534		0.086	0.0448	0.16225		-0.029	-0.1164	0.195904		At1g76440	expressed protein
A000249_01	At1g70360	-0.165	0.412	0.359	0	-0.053	0.648	0.386	0.404	0.318	0.13	0.762	0.735	0.698	0.625	0.395		0	0.1106	0.258601		0.386	0.3772	0.18624		0.698	0.643	0.147883		At1g70360	F-box protein-related
A000253_01	At1g20330	0.122	-0.121	-1.078	0	0.128	0	-0.093	-0.178	-0.174	-0.896	-0.261	-0.269	-0.327	-0.496	-0.317		0	-0.1898	0.50692		-0.174	-0.2682	0.358388		-0.317	-0.334	0.0950474		At1g20330	S-adenosyl-methionine-sterol-C-methyltransferase identical to sterol-C-methyltransferase GI:1061040 from [Arabidopsis thaliana]
A000255_01	At1g75960	0	0.214	-0.342			-0.218	-0.038	0.417	0.094	-0.143	0.355	0.198	0.355	0.47	0.482		0	-0.0426667	0.280445		-0.038	0.0224	0.249817		0.355	0.372	0.114628		At1g75960	AMP-binding protein, putative similar to AMP-binding protein GI:1903034 from [Brassica napus]; contains Pfam profile: PF00501 AMP-binding enzyme; identical to cDNA adenosine monophosphate binding protein 8 AMPBP8 (AMPBP8) GI:20799724
A000256_01	At1g76050	0.036	0	0.333	-0.178	-0.135	-0.251	-0.165	-0.019	-0.094	0.193	-0.289	-0.165	-0.052	-0.088	-0.309		0	0.0112	0.200915		-0.094	-0.0672	0.168888		-0.165	-0.1806	0.115751		At1g76050	pseudouridine synthase family protein contains Pfam profiles: PF00849 RNA pseudouridylate synthase, PF01479: S4 domain
A000259_01	At1g66350	0	0.027	0.379	-0.191	-0.212	0.26	0.015	-0.25	0.223	0.009	-0.092	-0.749	-0.398		-1.092		0	0.0006	0.237589		0.015	0.0514	0.204282		-0.574	-0.58275	0.432798		At1g66350	gibberellin regulatory protein (RGL1) similar to GB:CAA75492 from [Arabidopsis thaliana]; contains Pfam profile PF03514: GRAS family transcription factor; identical to cDNA RGL1 protein GI:15777856, RGL1 protein [Arabidopsis thaliana] GI:15777857
A000260_01	At1g76020	0	-0.147	-0.266	0.096	0.343	-0.245	-0.387	-0.241	-0.439	-0.645	-0.489	-0.51	-0.667	-0.824	-0.159		0	0.0052	0.234038		-0.387	-0.3914	0.166321		-0.51	-0.5298	0.24745		At1g76020	expressed protein
A000261_01	At1g75230	0.091	-0.03	0.132	-0.068	0	0.056	0.078	-0.026	0.491	0.42	0.038	0.228	0.217	0.093	-0.092		0	0.025	0.0838212		0.078	0.2038	0.234363		0.093	0.0968	0.133021		At1g75230	HhH-GPD base excision DNA repair family protein contains Pfam domain PF00730: HhH-GPD superfamily base excision DNA repair protein
A000263_01	At1g75190	-0.322	0	0.247	-0.372	0.025	0.431	0.744	0.52	0.194	0.841	0.551	0.595	0.593	0.457	0.798		0	-0.0844	0.258885		0.52	0.546	0.256921		0.593	0.5988	0.12462		At1g75190	expressed protein
A000266_01	At1g47230	-0.002	0.078	-0.261	0.002		0.152	0.159	-0.171	-0.19		0.211	0.148	0.117	0.046	-0.137		0	-0.04575	0.148145		-0.009	-0.0125	0.194166		0.117	0.077	0.133561		At1g47230	cyclin, putative similar to cyclin A-like protein [Nicotiana tabacum] GI:1064931, A-type cyclin [Catharanthus roseus] GI:2190259; contains Pfam profiles PF00134: Cyclin, N-terminal domain, PF02984: Cyclin, C-terminal domain
A000267_01	At1g76800	0.022	-0.465	-0.717	0	0.014	-0.385	-0.598	-0.364	-0.769	0.211	-0.653	-0.959	-0.523	-0.531	-0.235		0	-0.2292	0.342173		-0.385	-0.381	0.370271		-0.531	-0.5802	0.261555		At1g76800	nodulin, putative similar to nodulin 21 (N-21) [Glycine max] SWISS-PROT:P16313
A000268_01	At1g47260	0.021	0	0.287	-0.179	-0.292	0.024	-0.047	-0.092	0.036	-0.017	-0.239	-0.197	-0.159	-0.075	-0.254		0	-0.0326	0.220681		-0.017	-0.0192	0.0524185		-0.197	-0.1848	0.0717579		At1g47260	bacterial transferase hexapeptide repeat-containing protein contains Pfam profile PF00132: Bacterial transferase hexapeptide (four repeats)
A000269_01	At1g60420	-0.186	0	0.077	0.004	-0.326	0.2	-0.06	0.131	0.292	0.265	0.29	0.379	0.142	0.25	0.081		0	-0.0862	0.165578		0.2	0.1656	0.140653		0.25	0.2284	0.118462		At1g60420	DC1 domain-containing protein contains Pfam domain PF03107: DC1 domain
A000270_01	At1g60430	0	0.08	-0.368	-0.18	0.166	-0.3	-0.188	-0.039	-0.269	-1.024	-0.262	-0.012	-0.142	-0.116	-0.183		0	-0.0604	0.214207		-0.269	-0.364	0.382532		-0.142	-0.143	0.0917224		At1g60430	ARP2/3 complex 21 kDa subunit family contains Pfam PF04062: P21-ARC (ARP2/3 complex 21 kDa subunit); similar to Arp2/3 complex subunit p21-Arc (GI:6983853) [Mus musculus]; similar to ARP2/3 complex 21 kDa subunit (P21-ARC) (Actin-related protein 2/3 compl
A000275_01	At1g51450	0.246	0.207	-0.27		-0.207	0.004	0.438	0.051	-0.007		-0.097	0.002	-0.287	0.059	-0.108		0	-0.006	0.270167		0.027	0.1215	0.212494		-0.097	-0.0862	0.132075		At1g51450	SPla/RYanodine receptor (SPRY) domain-containing protein low similarity to DEAD box protein DDX1 [Gallus gallus] GI:16323037, ryanodine receptor [Caenorhabditis elegans] GI:1871447; contains Pfam profile PF00622: SPRY domain
A000277_01	At1g51550	-0.02	0	-0.154	0.13	0.165	-0.451	-0.563	-0.288	-0.464	-0.242	-0.359	-0.234	-0.422	-0.393	-0.166		0	0.0242	0.127782		-0.451	-0.4016	0.133005		-0.359	-0.3148	0.109808		At1g51550	F-box family protein similar to F-box ZEITLUPE/FKF/LKP/ADAGIO proteins e.g. GI:13487068 from [Arabidopsis thaliana]
A000282_01	At1g68220	0	0.249	0.447	-0.25	-0.313	0.817	0.417	-0.118	-0.123	-0.014	0.333	0.255	-0.121	0.124	0.63		0	0.0266	0.323551		-0.014	0.1958	0.411989		0.255	0.2442	0.275981		At1g68220	expressed protein
A000296_01	At1g69900	0	-0.47	0.05	-0.137	0.227	-0.206	-0.198	0.354	0.841	1.019	-0.326	-0.617	-0.102	-0.304	-0.438		0	-0.066	0.260729		0.354	0.362	0.569513		-0.326	-0.3574	0.189047		At1g69900	expressed protein contains Pfam profile: PF04601 protein of unknown function (DUF569
A000297_01	At1g69720	0.269	0.004	0	-0.045	-0.01	0.041	0.055	0.292	0.376	-0.766	0.008	0.295	0.135	0.163	-0.023		0	0.0436	0.127473		0.055	-0.0004	0.452245		0.135	0.1156	0.128058		At1g69720	heme oxygenase 3 (HO3) similar to heme oxygenase 3 [Arabidopsis thaliana] gi|14485563|gb|AAK63006
A000301_01	At1g69790	-0.224	-0.083	0	0.185	0.086	-0.157	-0.256	-0.451	-0.011	0.227	0.004	0.144	0.222	-0.137	-0.041		0	-0.0072	0.156865		-0.157	-0.1296	0.255566		0.004	0.0384	0.144147		At1g69790	protein kinase, putative similar to protein kinase APK1A [Arabidopsis thaliana] SWISS-PROT:Q06548
A000303_01	At1g77220	0.158	0.276	0	-0.164	-0.127	0.414	0.319	0.247	0.354	-0.632	0.355	0.519	0.345	0.367	0.036		0	0.0286	0.187133		0.319	0.1404	0.435989		0.355	0.3244	0.176224		At1g77220	expressed protein contains Pfam profile PF03619: Domain of unknown function
A000305_01	At1g73980	-0.169	-0.118	0.041	0.052	0	-0.315	-0.21	-0.295	-0.572	-0.073	-0.197	-0.085	-0.224	-0.272	-0.127		0	-0.0388	0.0991751		-0.295	-0.293	0.182769		-0.197	-0.181	0.07503		At1g73980	phosphoribulokinase/uridine kinase family protein weak similarity to SP|Q59190 Uridine kinase (EC 2.7.1.48) (Uridine monophosphokinase) (Cytidine monophosphokinase) {Borrelia burgdorferi}; contains Pfam profile PF00485: Phosphoribulokinase / Uridine kinas
A000307_01	At1g77210	-0.126	0.025	-0.847	0	0.235	-0.632	0.179	0.442	-0.454	-1.01	0.423	0.255	0.191	0.341	0.828		0	-0.1426	0.414566		-0.454	-0.295	0.595382		0.341	0.4076	0.250804		At1g77210	sugar transporter, putative similar to monosaccharide transporter PaMst-1 [Picea abies] GI:2258137, sugar carrier protein GI:169735 from [Ricinus communis], glucose transporter [Saccharum hybrid cultivar H65-7052] GI:347855; contains Pfam profile PF00083:
A000316_01	At1g10910	0	0.036	0.331	-0.176	-0.073	0.178	0.239	0.233	0.008	0.338	0.24	0.3	0.408	0.197	0.295		0	0.0236	0.189985		0.233	0.1992	0.121448		0.295	0.288	0.0793379		At1g10910	pentatricopeptide (PPR) repeat-containing protein contains Pfam profile PF01535: PPR repeat
A000319_01	At1g26820	0.499	0.088	0	-0.608	-0.682	0.477	-0.294	-0.512	-0.137	-1.416	-0.74	-0.45	-0.803	-0.531	-0.127		0	-0.1406	0.498169		-0.294	-0.3764	0.687668		-0.531	-0.5302	0.268067		At1g26820	ribonuclease 3 (RNS3) identical to ribonuclease SP:P42815 Ribonuclease 3 precursor (EC 3.1.27.1) {Arabidopsis thaliana}
A000322_01	At1g27190	-0.028	0	0.061	0.06	-0.01	-0.158	-0.133	-0.141	-0.258	0.2	-0.241	-0.305	0.032	-0.171	-0.263		0	0.0166	0.0413134		-0.141	-0.098	0.173981		-0.241	-0.1896	0.133041		At1g27190	leucine-rich repeat transmembrane protein kinase, putative similar to CLV1 receptor kinase GB:AAB58929 GI:2160756 from [Arabidopsis thaliana]
A000324_01	At1g69420	0.285	-0.203	-0.291	0.072	0	0.01	-0.037	-0.358	-0.681	-1.366	-0.486	-0.629	-0.47	-0.504	-0.58		0	-0.0274	0.228334		-0.358	-0.4864	0.564895		-0.504	-0.5338	0.0678985		At1g69420	zinc finger (DHHC type) family protein contains Pfam profile: PF01529: DHHC zinc finger domain
A000325_01	At1g20070	0.13	0.362	-1.344	0	-0.104	0.234	0.402	-0.176	0.685	-1.692	-0.512	-0.695	-0.726	-0.263	-0.924		0	-0.1912	0.667516		0.234	-0.1094	0.938028		-0.695	-0.624	0.249154		At1g20070	expressed protein
A000326_01	At1g59750	0	-0.046	0.203	0.193	-0.106	0.259	0.108	0.041	-0.033	-0.018	0.191	-0.024	-0.261	-0.065	0.132		0	0.0488	0.141335		0.041	0.0714	0.11869		-0.024	-0.0054	0.177962		At1g59750	auxin-responsive factor (ARF1) identical to auxin response factor 1 GI:2245378 from [Arabidopsis thaliana]
A000327_01	At1g46768	-0.396	0.029	-0.742	0.002	0	-1.27	-0.825	0.142	-0.718	-0.525	0.154	-0.346	-0.025	-0.054	0.019		0	-0.2214	0.34027		-0.718	-0.6392	0.515256		-0.025	-0.0504	0.183462		At1g46768	AP2 domain-containing protein RAP2.1 (RAP2.1) identical to AP2 domain containing protein RAP2.1 GI:2281627 from [Arabidopsis thaliana]
A000336_01	At1g63830	0.237	-0.05	0.171	0	-0.474	0.144	0.728	1.146	1.689	1.648	0.02	0.447	0.631	0.438	-0.157		0	-0.0232	0.278341		1.146	1.071	0.651432		0.438	0.2758	0.329596		At1g63830	proline-rich family protein contains proline-rich extensin domains, INTERPRO:IPR002965; contains 1 predicted transmembrane domain
A000339_01	At1g54820	0.319	0	-0.172	-0.063	0.144	-1.199	-0.9	-1.259	-1.374	-1.862	-1.756	-1.456	-1.219	-1.44	-1.493		0	0.0456	0.190823		-1.259	-1.3188	0.350512		-1.456	-1.4728	0.1913		At1g54820	protein kinase family protein contains protein kinase domain, Pfam:PF00069
A000343_01	At1g63850	0.07	0.097	-0.107	0	-1.438	-0.928	-0.336	-0.792	-0.915	-2.085		-0.38	-0.705	-0.579	-1.61		0	-0.2756	0.654566		-0.915	-1.0112	0.646755		-0.642	-0.8185	0.544364		At1g63850	PRLI-interacting factor-related similar to PRLI-interacting factor G (GI:11139264) [Arabidopsis thaliana]; contains Prosite PS00037: Myb DNA-binding domain repeat signature 1
A000346_01	At1g54730	0.095	0.167	-0.53	0	-0.225	-0.106	-0.077	-0.224	-0.311	-2.09	-0.207	-0.072	-0.454	0.088	-0.326		0	-0.0986	0.282767		-0.224	-0.5616	0.859533		-0.207	-0.1942	0.211897		At1g54730	sugar transporter, putative similar to ERD6 protein [Arabidopsis thaliana] GI:3123712, sugar-porter family proteins 1 and 2 [Arabidopsis thaliana] GI:14585699, GI:14585701; contains Pfam profile PF00083: major facilitator superfamily protein
A000351_01	At1g03330	0	0.087	0.677	0	-0.116	0.279	0.187	0.056	0.101	0.309	0.267	0.421	0.52	0.358	0.264		0	0.1296	0.314394		0.187	0.1864	0.109434		0.358	0.366	0.108409		At1g03330	small nuclear ribonucleoprotein D, putative / snRNP core SM-like protein, putative / U6 snRNA-associated Sm-like protein, putative similar to SWISS-PROT:Q9Y333 U6 snRNA-associated Sm-like protein LSm2 (Small nuclear ribonuclear protein D homolog, G7b, SnR
A000352_01	At1g80270	0	-0.111	0.835	0.321	-0.464	0.669	0.297	-0.408	-0.026	0.814	0.474	-0.124	0.128	0.403	0.422		0	0.1162	0.489993		0.297	0.2692	0.50079		0.403	0.2606	0.253657		At1g80270	DNA-binding protein, putative similar to DNA-binding protein [Triticum aestivum] GI:6958202; contains Pfam profile: PF01535 PPR repeat
A000353_01	At1g63770	0.054	0	-0.303	0.209	-0.889	-0.578	0.068	0.014	-0.022	-1.726	-0.496	0.109	0.057	0.129	-0.856		0	-0.1858	0.434775		-0.022	-0.4488	0.760157		0.057	-0.2114	0.443586		At1g63770	peptidase M1 family protein similar to SP|P04825 Aminopeptidase N (EC 3.4.11.2) (Alpha-aminoacylpeptide hydrolase) {Escherichia coli}; contains Pfam profile PF01433: Peptidase family M1
A000358_01	At1g63660	0	0.029	0.685	-0.001	-1.329	-0.451	0.093	-0.085	0.052	0.234	-0.522	0.195	0.526	0.561	-0.689		0	-0.1232	0.734918		0.052	-0.0314	0.260675		0.195	0.0142	0.586434		At1g63660	GMP synthase [glutamine-hydrolyzing], putative / glutamine amidotransferase, putative similar to SP|P38625 GMP synthase [glutamine-hydrolyzing] (EC 6.3.5.2) (Glutamine amidotransferase) (GMP synthetase) {Saccharomyces cerevisiae}; contains Pfam profile PF
A000359_01	At1g63680	0	0.087	-0.589	0.222	-1.259	-1.176	-0.3	-0.449	-0.84	-1.997	-0.963	-0.07	-0.478	-0.265	-1.347		0	-0.3078	0.615457		-0.84	-0.9524	0.676915		-0.478	-0.6246	0.523154		At1g63680	Mur ligase family protein contains Pfam profile: PF01225 Mur ligase family, catalytic domain
A000362_01	At1g03370	0.132	-0.132	0.186		-0.177	0.316	-0.052	0.396	0.808	0.76	0.002	-0.018	-0.091	-0.213	-0.045		0	0.00225	0.18326		0.396	0.4456	0.352506		-0.045	-0.073	0.0856709		At1g03370	C2 domain-containing protein / GRAM domain-containing protein contains Pfam profiles PF00168: C2 domain; contains PF02893: GRAM domain; similar to Chain A, Crystal Structure Of Synaptotagmin Iii C2aC2B Length(GI:6980525); similar to Synaptotagmin III (Syt
A000364_01	At1g20810	0.068	-0.019	-0.354	0	0.259	-0.394	-0.262	-0.237	-0.355	-0.894	-0.241	-0.121	-0.382	-0.415	-0.018		0	-0.0092	0.2219		-0.355	-0.4284	0.268178		-0.241	-0.2354	0.168915		At1g20810	immunophilin / FKBP-type peptidyl-prolyl cis-trans isomerase family protein identical to Probable FKBP-type peptidyl-prolyl cis-trans isomerase 1, chloroplast precursor (Ppiase) (Rotamase) (SP:Q9LM71)[Arabidopsis thaliana]; similar to SP|P25138 FK506-bind
A000365_01	At1g74290	-0.313	0.079	0.238	0	-0.194	0.11	0.063	0.245	0.383	0.71	-0.079	0.182	0.138	0.019	-0.057		0	-0.038	0.218672		0.245	0.3022	0.259932		0.019	0.0406	0.11595		At1g74290	esterase/lipase/thioesterase family protein contains Interpro entry IPR000379 esterase/lipase/thioesterase family
A000368_01	At1g74250	0	-0.11	0.35	0.168	-0.244	0.278	0.427	0.249	0.3	0.782	0.525	0.242	0.37	0.345	0.504		0	0.0328	0.232906		0.3	0.4072	0.220272		0.37	0.3972	0.11757		At1g74250	DNAJ heat shock N-terminal domain-containing protein contains Pfam domains PF00226: DnaJ domain and PF00096: Zinc finger, C2H2 type
A000369_01	At1g78800	0	0.007	-0.453	-0.106	0.037	-0.043	-0.051	0.007	-0.015		-0.008	0.113	-0.108	-0.021	0.181		0	-0.103	0.202989		-0.029	-0.0255	0.026602		-0.008	0.0314	0.114858		At1g78800	glycosyl transferase family 1 protein contains similarity to glycosyltransferase GI:871530 from [Saccharomyces cerevisiae], Alg2 mannosyltransferase [gi:3868942] from Rhizomucor pusillus; contains Pfam profile: PF00534 Glycosyl transferases group 1
A000371_01	At1g74230	-0.066	-0.083	0	0.077	0.113	0.206	0.031	-0.08	-0.009	0.139	0.061	0.055	-0.153	-0.072	0.238		0	0.0082	0.0860331		0.031	0.0574	0.11481		0.055	0.0258	0.148875		At1g74230	glycine-rich RNA-binding protein similar to RNA-binding protein GB:S46286 from [Nicotiana sylvestris]
A000373_01	At1g20770	0.005	-0.172	0	-0.298	0.076	0.35	0.176	0.088	0.223	0.247	0.131	0.321	-0.071	0.064	0.293		0	-0.0778	0.153236		0.223	0.2168	0.0961078		0.131	0.1476	0.162987		At1g20770	expressed protein
A000376_01	At1g78700	0	-0.398	-0.247	0.478	0.518	0.012	-0.141	0.109	-0.231	0.458	0.129	0.058	-0.341	-0.321	0.357		0	0.0702	0.415807		0.012	0.0414	0.26761		0.058	-0.0236	0.301658		At1g78700	brassinosteroid signalling positive regulator-related contains similarity to BZR1 protein [Arabidopsis thaliana] gi|20270971|gb|AAM18490
A000377_01	At1g76350	0.018	-0.109	-0.018	0.172		-0.058	-0.347	-0.533	-0.535		-0.386	-0.163	-0.374	-0.43	-0.346		0	0.01575	0.117077		-0.44	-0.36825	0.224837		-0.374	-0.3398	0.103364		At1g76350	RWP-RK domain-containing protein similar to nodule inception protein [Lotus japonicus] GI:6448579; contains Pfam profile: PF02042 RWP-RK domain
A000380_01	At1g10950	0	-0.077	-0.708	0.145	0.093	0.064	-0.065	-0.116	-0.144	-1.104	0.047	-0.085	-0.025	-0.072	0.298		0	-0.1094	0.345335		-0.116	-0.273	0.47135		-0.025	0.0326	0.157109		At1g10950	endomembrane protein 70, putative
A000381_01	At1g01600	-0.286	0	0.03	0.243	-0.241	0.195	0.047	-0.172	-0.024	0.019	-0.731	-1.375		-0.551	-1.564		0	-0.0508	0.216173		0.019	0.013	0.132202		-1.053	-1.05525	0.490059		At1g01600	cytochrome P450, putative similar to cytochrome P450 GI:10442763 from [Triticum aestivum]
A000382_01	At1g11080	-0.088	0.052	0.518	0	-0.098	-0.192	-0.025	-0.096	-0.105	0.092	-0.137	-0.211	-0.062	-0.135	-0.395		0	0.0768	0.254404		-0.096	-0.0652	0.105994		-0.137	-0.188	0.127146		At1g11080	serine carboxypeptidase S10 family protein similar to Serine carboxypeptidase II chains A and B (SP:P08819) (EC 3.4.16.6) [Triticum aestivum (Wheat)]
A000383_01	At1g74590	0.072	-0.072	0.576	-0.485		1.473	1.099	2.23	3.185	4.019	2.562	2.685	3.449	2.818	2.465		0	0.02275	0.437911		2.23	2.4012	1.20605		2.685	2.7958	0.388436		At1g74590	glutathione S-transferase, putative similar to putative glutathione S-transferase GB:CAA10060 [Arabidopsis thaliana]; contains Pfam profile: PF00043 Glutathione S-transferases
A000384_01	At1g32260	-0.29	0.05	0.079	0	-0.011	0.037	0.047	-0.124	-0.093	-0.131	0.062	0.371	-0.21	-0.085	0.431		0	-0.0344	0.147517		-0.093	-0.0528	0.087785		0.062	0.1138	0.280098		At1g32260	expressed protein identical to hypothetical protein GB:AAF81322 GI:8920600 from [Arabidopsis thaliana]
A000394_01	At1g32340	0	-0.13	-0.897	0.041	0.222	-0.085	0.199	0.405	0.458	0.267	0.262		0.2	0.227	0.091		0	-0.1528	0.434665		0.267	0.2488	0.21354		0.214	0.195	0.0738331		At1g32340	zinc finger (C3HC4-type RING finger) family protein contains a Zinc finger, C3HC4 type (RING finger) signature, PROSITE:PS00518
A000400_01	At1g32400	0.075	0	-0.683	-0.026	0.162	0.11	0.164	0.044	0.13	-0.446	0.502		0.362	0.282	0.394		0	-0.0944	0.337075		0.11	0.0004	0.253351		0.378	0.385	0.091119		At1g32400	senescence-associated family protein contains Pfam profile PF00335: Tetraspanin family
A000402_01	At1g23730	0.27	0.087	-0.087	-0.127		1.353	1.813	1.232	0.94	0.289	0.728	0.499	0.934	0.368	0.319		0	0.03575	0.181709		1.232	1.1254	0.563449		0.499	0.5696	0.258024		At1g23730	carbonic anhydrase, putative / carbonate dehydratase, putative similar to SP|P27140 Carbonic anhydrase, chloroplast precursor (EC 4.2.1.1) (Carbonate dehydratase) {Arabidopsis thaliana}; contains Pfam profile PF00484: Carbonic anhydrase
A000403_01	At1g23750	-0.018	-0.222	0.396		0.018	0.021	-0.215	-0.324	-0.386	-0.369	-0.663	-0.653	-0.62	-0.645	-0.455		0	0.0435	0.257668		-0.324	-0.2546	0.167849		-0.645	-0.6072	0.0865575		At1g23750	DNA-binding protein-related contains weak similarity to G-quartet DNA binding protein 3 [Tetrahymena thermophila] gi|4583503|gb|AAD25098
A000405_01	At1g32440	0	-0.118	-0.069	0.303	0.08	-0.458	-0.524	-0.407	-0.416	-1.009	-0.287	-0.479	-0.529	-0.313	-0.272		0	0.0392	0.165235		-0.458	-0.5628	0.253676		-0.313	-0.376	0.119084		At1g32440	pyruvate kinase, putative similar to pyruvate kinase isozyme G, chloroplast precursor [Nicotiana tabacum] SWISS-PROT:Q40546
A000406_01	At1g32470	0.057	0	0.191	-0.515	-0.092	-0.347	-0.172	-0.055	-0.498	-0.334	-0.6	-0.501	-0.477	-0.496	-0.629		0	-0.0718	0.268162		-0.334	-0.2812	0.17118		-0.501	-0.5406	0.0688208		At1g32470	glycine cleavage system H protein, mitochondrial, putative similar to SP|P25855 Glycine cleavage system H protein 1, mitochondrial precursor {Arabidopsis thaliana}; contains Pfam profile PF01597: Glycine cleavage H-protein
A000411_01	At1g32530	0.08	0	0.337	-0.122	-0.14	-0.038	-0.145	0.106	0.181	-0.216	0.142	0.384	0.413	0.2	-0.161		0	0.031	0.193422		-0.038	-0.0224	0.166293		0.2	0.1956	0.230658		At1g32530	zinc finger (C3HC4-type RING finger) family protein contains Pfam profile: PF00097 zinc finger, C3HC4 type (RING finger); weak similarity to interaptin (GI:3549261) [Dictyostelium discoideum] weak similarity to Axoneme-associated protein mst101(2) (Swiss-
A000412_01	At1g70570	-0.282	-0.227	0.244	0.21	0	-0.313	-0.297	-0.236	-0.203	0.348	-0.259	-0.192	-0.179	-0.186	-0.042		0	-0.011	0.241911		-0.236	-0.1402	0.276544		-0.186	-0.1716	0.0792357		At1g70570	anthranilate phosphoribosyltransferase, putative similar to anthranilate phosphoribosyltransferase (EC 2.4.2.18) SP:O66576 from [Aquifex aeolicus]
A000419_01	At1g76320	0	-0.098	0.653	0.243	-0.034	-0.178	-0.101	-0.138	-0.119	0.348	-0.007	0.019	-0.035	-0.035	-0.086		0	0.1528	0.308009		-0.119	-0.0376	0.217443		-0.035	-0.0288	0.0390794		At1g76320	far-red impaired responsive protein, putative similar to far-red impaired response protein FAR1 [Arabidopsis thaliana] gi|5764395|gb|AAD51282; contains Pfam:PF03101 domain: FAR1 family
A000420_01	At1g67530	-0.103	-0.209	0.828	0.435	0	-0.05	-0.056	-0.028	0.247	0.551	-0.058	-0.102	0.139	-0.124	0.229		0	0.1902	0.432498		-0.028	0.1328	0.265919		-0.058	0.0168	0.157714		At1g67530	armadillo/beta-catenin repeat family protein / U-box domain-containing family protein contains Pfam domain, PF00514: Armadillo/beta-catenin-like repeats and Pfam, PF04564: U-box domain
A000430_01	At1g24400	0	0.118	-0.27	-0.048	0.367	-0.22	-0.491	0.041	0.047		-0.409	-0.543	-0.297	-0.182	-0.13		0	0.0334	0.23358		-0.09	-0.15575	0.255825		-0.297	-0.3122	0.168091		At1g24400	lysine and histidine specific transporter, putative similar to lysine and histidine specific transporter GI:2576361 from [Arabidopsis thaliana]; contains Pfam profile PF01490: Transmembrane amino acid transporter protein
A000431_01	At1g03820	0.929	0.393	0	-0.057	-0.173	0.771	0.55	0.541	0.458	0.193	-0.93	-0.856	-1.386	-0.907	-1.771		0	0.2184	0.450604		0.541	0.5026	0.208327		-0.93	-1.17	0.397876		At1g03820	expressed protein similar to arabinogalactan-protein; AGP (GI:1087015) {Pyrus communis}; similar to Protein E6. (SP:Q01197) {Gossypium hirsutum}
A000436_01	At1g03750	-0.059	0.059	0.521	-0.135		-0.1	0.153	0.01	-0.156		-0.317	0.04	-0.219	-0.173	-0.15		0	0.0965	0.29404		-0.045	-0.02325	0.136238		-0.173	-0.1638	0.130697		At1g03750	helicase, putative similar to SP|Q03468 Excision repair protein ERCC-6 (Cockayne syndrome protein CSB) {Homo sapiens}; contains Pfam profiles PF00271: Helicase conserved C-terminal domain, PF00176: SNF2 family N-terminal domain, PF02810: SEC-C motif
A000441_01	At1g13750	0	0.198	-0.006	-0.605	0.434	-0.26	-0.864	-0.469	-0.083	0.782	-0.821	-0.237	-0.33	-0.082	-0.163		0	0.0042	0.385205		-0.26	-0.1788	0.610865		-0.237	-0.3266	0.291147		At1g13750	calcineurin-like phosphoesterase family protein contains Pfam profile: PF00149 calcineurin-like phosphoesterase
A000442_01	At1g52920	-0.233	0	0.348			-0.25	-0.079	0.031	-0.033	0.526	0.343	0.058	0.184	0.21	0.384		0	0.0383333	0.292391		-0.033	0.039	0.291488		0.21	0.2358	0.130783		At1g52920	lanthionine synthetase C-like family protein contains Pfam domain, PF05147: Lanthionine synthetase C-like protein
A000448_01	At1g26850	0.033	0	-0.427	0.245	-0.072	0.349	0.142	0.068	0.036	-1.117	0.146	0.025	0.067	0.126	-0.044		0	-0.0442	0.244366		0.068	-0.1044	0.579024		0.067	0.064	0.0770746		At1g26850	dehydration-responsive family protein similar to early-responsive to dehydration stress ERD3 protein [Arabidopsis thaliana] GI:15320410; contains Pfam profile PF03141: Putative methyltransferase
A000454_01	At1g36320	0.006	0.055	0	-0.168	-0.222	-0.041	-0.045	0.05	0.035	-0.402	0.013	0.14	0.118	0.06	-0.121		0	-0.0658	0.121368		-0.041	-0.0806	0.184766		0.06	0.042	0.10382		At1g36320	expressed protein similar to hypothetical protein GB:CAB37532 from [Arabidopsis thaliana],
A000455_01	At1g09300	-0.075	-0.257	0.056	0	0.241	0.118	-0.047	-0.142	0.03	0.782	0.219	0.074	-0.204	-0.131	0.515		0	-0.007	0.182103		0.03	0.1482	0.367051		0.074	0.0946	0.288398		At1g09300	metallopeptidase M24 family protein similar to SP|P15034 Xaa-Pro aminopeptidase (EC 3.4.11.9) (X-Pro aminopeptidase) (Aminopeptidase P II) (Aminoacylproline aminopeptidase) {Escherichia coli}; contains Pfam profiles PF00557: metallopeptidase family M24, P
A000462_01	At1g04420	0.12	0	-1.202	-0.065	0.164	-0.398	-0.372	-0.196	-0.404	-1.706	-0.664	-0.63	-0.425	-0.517	-0.424		0	-0.1966	0.569444		-0.398	-0.6152	0.615731		-0.517	-0.532	0.112212		At1g04420	aldo/keto reductase family protein Similar to SP|Q46933 Tas protein {Escherichia coli}, Babesia aldo-keto reductase SP|P40690; contains Pfam profile PF00248: oxidoreductase, aldo/keto reductase family
A000463_01	At1g66330	0.074	0.239	-0.896	0	-0.224	-0.876	-0.65	-0.338	-0.742	-2.632	-0.817	-0.593	-0.514	-0.336	-1.276		0	-0.1614	0.443097		-0.742	-1.0476	0.907576		-0.593	-0.7072	0.361852		At1g66330	senescence-associated family protein similar to senescence-associated protein (GI:12836895) [Ipomoea batatas]
A000469_01	At1g63260	0.603	-0.121	-0.005	0	0.666	0.478	0.637	0.374	0.763	0.129	-0.099	-0.196	0.283	0.115	-0.126		0	0.2286	0.374346		0.478	0.4762	0.244493		-0.099	-0.0046	0.198306		At1g63260	senescence-associated family protein similar to senescence-associated protein 5 [Hemerocallis hybrid cultivar] gi|3551954|gb|AAC34855
A000471_01	At1g03687	0	-0.258	0.216	0.003	-0.224	0.046	-0.075	-0.475	-0.332	0.15	-0.212	-0.54	-0.481	-0.353	-0.169		0	-0.0526	0.193372		-0.075	-0.1372	0.260754		-0.353	-0.351	0.162073		At1g03687	DTW domain-containing protein contains Pfam PF03942: DTW domain
A000478_01	At1g61770	0.281	0.092	-0.065	0	-0.043	0.577	0.538	0.346	0.53	-0.231	0.429	0.568	0.355	0.318	0.18		0	0.053	0.140938		0.53	0.352	0.337946		0.355	0.37	0.142928		At1g61770	DNAJ heat shock N-terminal domain-containing protein similar to SP|Q9UBS4 DnaJ homolog subfamily B member 11 precursor Homo sapiens; contains Pfam profile PF00226 DnaJ domain
A000479_01	At1g35460	0.209	-0.072	0.555	-0.135	0	0.046	0.084	0.308	-0.252	0.28	0.019	0.122	0.037	0.018	-0.057		0	0.1114	0.279761		0.084	0.0932	0.225005		0.019	0.0278	0.0638804		At1g35460	basic helix-loop-helix (bHLH) family protein similar to GI:6166283 from [Pinus taeda]
A000483_01	At1g78110	0.132	-0.157	-0.772	0	0.291	-0.105	-0.032	-0.245	-0.49	-1.317	-0.161	0.096	-0.373	-0.371	-0.142		0	-0.1012	0.409735		-0.245	-0.4378	0.521613		-0.161	-0.1902	0.194416		At1g78110	expressed protein
A000486_01	At1g73790	-0.164	0.082	0.774	-0.167	0	0.147	0.138	0.296	0.368	1.079	0.332	0.148	0.584	0.348	0.334		0	0.105	0.389057		0.296	0.4056	0.38903		0.334	0.3492	0.155033		At1g73790	expressed protein
A000489_01	At1g03550	-0.119	0	0.713	0.613	-0.249	0.478	0.685	0.384	0.122	0.853	0.639	0.869	0.517	0.314	0.508		0	0.1916	0.440666		0.478	0.5044	0.280874		0.517	0.5694	0.20393		At1g03550	secretory carrier membrane protein (SCAMP) family protein contains Pfam domain, PF04144: SCAMP family
A000491_01	At1g31160	0.02		-0.788	-0.02	0.195	-0.094	-0.273	-0.181	-0.275	-0.731	-0.14	-0.351	-0.206	-0.511	0.118		0	-0.14825	0.436599		-0.273	-0.3108	0.24654		-0.206	-0.218	0.235935		At1g31160	zinc-binding protein, putative / protein kinase C inhibitor, putative similar to 14 kDa zinc-binding protein (Protein kinase C inhibitor, PKCI) [Zea mays] Swiss-Prot:P42856
A000494_01	At1g03470	-0.153	0.153	0.902		-0.466	1.011	0.706	0.16	0.189	0.717	0.975	0.72	0.599	0.482	0.493		0	0.109	0.585962		0.706	0.5566	0.36978		0.599	0.6538	0.203671		At1g03470	kinase interacting family protein similar to kinase interacting protein 1 (GI:13936326) [Petunia integrifolia]
A000500_01	At1g73740	0	-0.04	0.148	-0.073	0.29	-0.465	-0.472	-0.068	0.264	0.482	-0.535	-0.555	-0.204	-0.185	-0.6		0	0.065	0.151499		-0.068	-0.0518	0.427854		-0.535	-0.4158	0.203496		At1g73740	glycosyl transferase family 28 protein similar to UDP-N-acetylglucosamine--N-acetylmuramyl-(pentapeptide)-pyrophosphoryl-undecaprenol N-acetylglucosamine transferase GB:O07670 [SP|O07670] from Enterococcus hirae, ]SP|O07109] from Enterococcus faecalis; co
A000501_01	At1g73800	0.109	0	0.077	-1.044	-0.215	0.293	-0.231	0.307	1.229	0.508	-0.101	-0.106	0.859	0.255	-0.855		0	-0.2146	0.480548		0.307	0.4212	0.527948		-0.101	0.0104	0.623464		At1g73800	calmodulin-binding protein similar to calmodulin-binding protein TCB60 GI:1698548 from [Nicotiana tabacum]
A000503_01	At1g07430	0.191	0	-0.551	0.255	-0.362	-1.179	-1.061	-0.599	-1.682	-1.646	-1.115	-0.718	-0.936	-1.091	-0.939		0	-0.0934	0.350904		-1.179	-1.2334	0.449062		-0.939	-0.9598	0.158719		At1g07430	protein phosphatase 2C, putative / PP2C, putative similar to GB:CAB90633 from [Fagus sylvatica]
A000511_01	At1g53730	0	-0.629	0.176	-0.269	0.038	-0.442	-0.548	-0.316	-0.128	-0.03	-0.764	-1.11	-0.604	-0.612	-0.528		0	-0.1368	0.318924		-0.316	-0.2928	0.214563		-0.612	-0.7236	0.232355		At1g53730	leucine-rich repeat transmembrane protein kinase, putative similar to GI:3360289 from [Zea mays] (Plant Mol. Biol. 37 (5), 749-761 (1998))
A000513_01	At1g76140	0	0.109	-0.578	0.172	-0.012	-0.059	-0.265	0.029	0.05	-0.959	0.104	0.07	0.194	0.178	-0.211		0	-0.0618	0.298579		-0.059	-0.2408	0.420358		0.104	0.067	0.16364		At1g76140	prolyl oligopeptidase, putative / prolyl endopeptidase, putative / post-proline cleaving enzyme, putative similar to SP|Q9QUR6 Prolyl endopeptidase (EC 3.4.21.26) (Post-proline cleaving enzyme) {Mus musculus}; contains Pfam profiles PF00326: prolyl oligop
A000514_01	At1g53760	0.043	-0.066	0.308	0	-0.275	0.613	0.577	0.37	0.731	1.175	0.724	0.642	0.66	0.612	0.739		0	0.002	0.210163		0.613	0.6932	0.299146		0.66	0.6754	0.054266		At1g53760	expressed protein
A000515_01	At1g54150	0.091	0.178	-0.418		-0.091	0.229	0.028	0.496	0.66		0.198	0.276	0.497	0.268	0.34		0	-0.06	0.263673		0.363	0.35325	0.280297		0.276	0.3158	0.113098		At1g54150	zinc finger (C3HC4-type RING finger) family protein contains Pfam profile: PF00097 zinc finger, C3HC4 type (RING finger)
A000517_01	At1g54170	-0.119	-0.21	0.065	0.106	0	0.067	-0.155	-0.028	0.156	0.117	-0.006	0.125	-0.064	-0.065	0.188		0	-0.0316	0.131081		0.067	0.0314	0.124893		-0.006	0.0356	0.115097		At1g54170	ataxin-2-related similar to SCA2 (GI:1770390) [Homo sapiens]; similar to ataxin-2 (GI:3005020) [Mus musculus]
A000519_01	At1g03140	0.194	0.084	-0.496	0	-0.024	0.395	0.372	0.251	0.031	-0.94	0.483	0.664	0.216	0.304	0.3		0	-0.0484	0.264372		0.251	0.0218	0.556685		0.304	0.3934	0.179888		At1g03140	splicing factor Prp18 family protein contains Pfam profile: PF02840 Prp18 domain
A000523_01	At1g03080	0	-0.1	0.718	0.067	-0.213	0.107	0.158	-0.002	0.446	0.928	0.315	0.091	0.325	0.492	-0.181		0	0.0944	0.364289		0.158	0.3274	0.374354		0.315	0.2084	0.260194		At1g03080	kinase interacting family protein similar to kinase interacting protein 1 (GI:13936326) [Petunia integrifolia]
A000526_01	At1g03030	0	0.115	0.379	-0.232	-0.164	-0.077	-0.126	0.182	0.272	0.231	-0.261	0.005	0.289	0.223	-0.453		0	0.0196	0.242727		0.182	0.0964	0.184261		0.005	-0.0394	0.31577		At1g03030	phosphoribulokinase/uridine kinase family protein contains Pfam PF00485: Phosphoribulokinase / Uridine kinase family; Belongs to Interpro IPR006083 Phosphoribulokinase/uridine kinase family; similar to Uridine kinase (Uridine monophosphokinase) (SP:P27515
A000528_01	At1g26750	0.224	0	0.487	-0.19	-0.001	0.414	0.258	-0.068	0.113	0.079	-0.013	0.203	0.154	0.209	0.041		0	0.104	0.259502		0.113	0.1592	0.183624		0.154	0.1188	0.0998609		At1g26750	expressed protein
A000529_01	At1g03000	-0.031	0	-0.138	0.085	0.036	-0.066	0.082	-0.315	-0.511	-0.938	0.056	-0.01	-0.37	-0.228	-0.148		0	-0.0096	0.0837634		-0.315	-0.3496	0.400053		-0.148	-0.14	0.170311		At1g03000	AAA-type ATPase family protein contains Pfam domain, PF00004: ATPase, AAA family ('A'TPases 'A'ssociated with diverse cellular 'A'ctivities)
A000531_01	At1g71340	-0.172	0.1	0.489	-0.1		-0.034	-0.025	0.027	-0.096	0.304	-0.12	0.042	0.085	-0.068	-0.195		0	0.07925	0.296413		-0.025	0.0352	0.156482		-0.068	-0.0512	0.115033		At1g71340	glycerophosphoryl diester phosphodiesterase family protein contains Pfam profile PF03009: Glycerophosphoryl diester phosphodiesterase family
A000533_01	At1g71310	0.106	0	0.597	-0.116	-0.218	0.284	0.25	0.041	-0.02	0.376	0.178	0.185	0.244	0.035	0.025		0	0.0738	0.316778		0.25	0.1862	0.168271		0.178	0.1334	0.0978739		At1g71310	expressed protein
A000534_01	At1g65230	0.097	0	0.166	-0.301	-0.14	-0.897	-0.841	-0.581	-0.697	-1.636	-1.409	-1.384	-0.779	-1.163	-1.35		0	-0.0356	0.187636		-0.841	-0.9304	0.413381		-1.35	-1.217	0.26325		At1g65230	expressed protein
A000536_01	At1g64640	0	-0.45	-0.749	0.26	0.201	-0.444	-0.257	-0.45	-0.347	-0.608	-0.768	-0.985	-0.97	-0.278	-0.822		0	-0.1476	0.436627		-0.444	-0.4212	0.131064		-0.822	-0.7646	0.287598		At1g64640	plastocyanin-like domain-containing protein contains InterPro:IPR003245 plastocyanin-like domain
A000548_01	At1g19330	-0.209	0	0.2	-0.304	0.04	-0.591	-0.668	-0.582	-0.983	-1.472	-0.84	-0.65	-0.751	-0.758	-1.03		0	-0.0546	0.201737		-0.668	-0.8592	0.379532		-0.758	-0.8058	0.1423		At1g19330	expressed protein
A000552_01	At1g11600	-0.027	-0.054	0.542	0.099	0	-0.086	-0.186	-0.144	-0.222	0.016	-0.254	-0.211		-0.369	-0.35		0	0.112	0.24723		-0.144	-0.1244	0.0933959		-0.302	-0.296	0.0757936		At1g11600	cytochrome P450, putative similar to cytochrome P450 77A2 (CYPLVIIA2) (P-450EG5) [Solanum melongena] and cytochrome P450 77A3 (SP:O48928) [Glycine max]; is a member of the PF|00067 Cytochrome P450 family. ESTs gb|Z30775 and gb|Z30776 come from this gene
A000553_01	At1g11820	-0.206	-0.157	0.517	0	0.003	-0.303	-0.368	-0.311	-0.371	-0.176	-0.064	-0.435	-0.29	-0.279	0.032		0	0.0314	0.28699		-0.311	-0.3058	0.0790614		-0.279	-0.2072	0.188167		At1g11820	glycosyl hydrolase family 17 protein similar to elicitor inducible chitinase Nt-SubE76 GI:11071974 from [Nicotiana tabacum]
A000555_01	At1g72180	0.255	-0.218	-0.37	0.47	0	0.196	0.431	0.451	0.225	-0.399	-0.069	-0.321	-0.365	-0.548	-0.382		0	0.0274	0.341539		0.225	0.1808	0.344224		-0.365	-0.337	0.172779		At1g72180	leucine-rich repeat transmembrane protein kinase, putative similar to GI:3641252 from [Malus x domestica] (Plant Mol. Biol. 40 (6), 945-957 (1999))
A000559_01	At1g20920	-0.288	0	0.169	0.126	-0.66	-0.306	-0.39	-0.155	-0.058	0.134	-0.203	-0.173	-0.111	0.204	-0.329		0	-0.1306	0.345579		-0.155	-0.155	0.206734		-0.173	-0.1224	0.199002		At1g20920	DEAD box RNA helicase, putative similar to RNA helicase [Rattus norvegicus] GI:897915; contains Pfam profiles PF00270: DEAD/DEAH box helicase, PF00271: Helicase conserved C-terminal domain
A000566_01	At1g05590	0.015	-0.188	0	-0.055	0.397	-0.204	-0.228	0.018	-0.185	0.381	-0.36	-0.31	-0.412	-0.217	-0.316		0	0.0338	0.218226		-0.185	-0.0436	0.25681		-0.316	-0.323	0.0720139		At1g05590	glycosyl hydrolase family 20 protein similar to beta-hexosaminidase precursor SP:P43077 from [Candida albicans]
A000567_01	At1g22190	-0.074	0	-0.886	0.751	0.452	0.425	0.316	0.714	0.125	1.463	0.919	0.273	0.547	0.332	0.643		0	0.0486	0.621886		0.425	0.6086	0.523044		0.547	0.5428	0.259236		At1g22190	AP2 domain-containing transcription factor, putative similar to AP2 domain containing protein RAP2.4 GI:2281633 from [Arabidopsis thaliana]
A000568_01	At1g05620	0.243	0	0.372	-0.313	-0.134	0.587	0.563	0.121	0.248	0.569	0.146	0.147	0.327	0.469	0.282		0	0.0336	0.27736		0.563	0.4176	0.217655		0.282	0.2742	0.135472		At1g05620	inosine-uridine preferring nucleoside hydrolase family protein similar to Chain A, Crystal Structure Of Nucleoside Hydrolase From Leishmania MajorGI:8569431; contains Pfam profile PF01156: Inosine-uridine preferring nucleoside hydrolase
A000569_01	At1g22180	0.459	0.279	0	-0.293	-0.52	0.365	0.112	0.572	0.785	-0.154	0.38	0.969	0.674	0.627	0.01		0	-0.015	0.401138		0.365	0.336	0.370275		0.627	0.532	0.359077		At1g22180	SEC14 cytosolic factor family protein / phosphoglyceride transfer family protein contains Pfam profile: PF00650 CRAL/TRIO domain; similar to polyphosphoinositide binding protein Ssh1p (GI:|2739044) {Glycine max}; similar to Phosphatidylinositol Transfer P
A000577_01	At1g72160	0.127	-0.067	0.343	-0.045	0	-0.018	0.17	0.152	-0.187	-0.301	0	-0.033	-0.055	0.01	-0.149		0	0.0716	0.169307		-0.018	-0.0368	0.206837		-0.033	-0.0454	0.063461		At1g72160	SEC14 cytosolic factor family protein / phosphoglyceride transfer family protein similar to GI:807956 from [Saccharomyces cerevisiae]similar to polyphosphoinositide binding protein Ssh2p (GI:2739046) {Glycine max}; contains Pfam PF00650 : CRAL/TRIO domain
A000582_01	At1g09430	0.026	-0.038	0	-0.069	0.188	-0.098	-0.115	0.262	0.214	-0.107	0.255	0.229	0.039	0.187	0.106		0	0.0214	0.099919		-0.098	0.0312	0.189638		0.187	0.1632	0.0894718		At1g09430	ATP-citrate synthase (ATP-citrate (pro-S-)-lyase/citrate cleavage enzyme), putative similar to ATP-citrate-lyase (GI:16648642) [Arabidopsis thaliana]; similar to ATP-citrate (pro-S-)-lyase (EC 4.1.3.8) (Citrate cleavage enzyme)(SP:Q91V92) {Mus musculus};
A000589_01	At1g09520	-0.028	0	0.139	0.039	-0.072	0.287	0.159	-0.092	-0.049	-0.015	0.342	0.522	0.017	0.1	0.377		0	0.0156	0.0799894		-0.015	0.058	0.159625		0.342	0.2716	0.207986		At1g09520	expressed protein
A000590_01	At1g51310	-0.005	0.136	0.142	-0.026	0	-0.174	-0.134	0.026	0.112	0.847	-0.154	-0.426	0.104	0.174	0.178		0	0.0494	0.0824002		0.026	0.1354	0.414486		0.104	-0.0248	0.262151		At1g51310	tRNA methyl transferase family protein contains Pfam PF03054: tRNA methyl transferase profile; similar to tRNA (5-methylaminomethyl-2-thiouridylate)-methyltransferase (EC 2.1.1.61). (Swiss-Prot:Q8ZPZ4) [Salmonella typhimurium]
A000592_01	At1g51340	0	-0.163	-0.162	0.125	0.308	0.04	-0.008	0.059	0.496	0.711	-0.093	0.327	0.185	-0.027	0.004		0	0.0216	0.200605		0.059	0.2596	0.323929		0.004	0.0792	0.172616		At1g51340	MATE efflux family protein contains Pfam profile PF01554: MatE
A000593_01	At1g51350	0	-0.08	-0.103	0.352	0.187	-0.194	-0.064	-0.077	-0.071	-0.631	-0.064	0.158	-0.238	-0.078	-0.148		0	0.0712	0.193994		-0.077	-0.2074	0.242791		-0.078	-0.074	0.146895		At1g51350	armadillo/beta-catenin repeat family protein contains Pfam profile: PF00514 armadillo/beta-catenin-like repeat
A000596_01	At1g09575	0.203	0.024	-0.024		-0.275	0.309	0.462	0.776	0.637	-0.02	0.276	0.11	0.575	0.473	0.287		0	-0.018	0.197222		0.462	0.4328	0.308501		0.287	0.3442	0.182093		At1g09575	expressed protein contains Pfam domain, PF04678: Protein of unknown function, DUF607
A000598_01	At1g66250	0.01	-0.239	-0.67	0	0.472	-0.293	-0.258	-0.281	-0.136		-0.82	-0.436	-0.391	-0.783			0	-0.0854	0.416065		-0.269	-0.242	0.0721434		-0.609	-0.6075	0.225271		At1g66250	glycosyl hydrolase family 17 protein similar to beta-1,3-glucanase GI:15150341 from [Camellia sinensis]
A000599_01	At1g29690	0.078	-0.31	-0.58	0	0.065	0.488	0.146	0.66	1.171		0.469	-0.054	0.609	0.006	-0.111		0	-0.1494	0.287753		0.574	0.61625	0.427101		0.006	0.1838	0.330607		At1g29690	expressed protein
A000602_01	At1g29640		0.584	-0.351	0.292	-0.292	0.78	0.246	-0.146	0.238	-0.319	0.719	0.578	0.886	0.94	0.684		0	0.05825	0.45505		0.238	0.1598	0.424546		0.719	0.7614	0.149036		At1g29640	expressed protein contains Pfam profile PF04520: Protein of unknown function, DUF584
A000605_01	At1g61350	0	0.106	0.99	-0.023	-0.295	-0.137	-0.207	-0.518	-0.11	0.22	-0.723	-0.49	-0.377	-0.363	-0.808		0	0.1556	0.489345		-0.137	-0.1504	0.263316		-0.49	-0.5522	0.203081		At1g61350	armadillo/beta-catenin repeat family protein armadillo/beta-catenin-like repeats, Pfam:PF00514
A000608_01	At1g13190	0	-0.062	0.303	0.127	-0.05	0.073	0.068	0.137	0.038	0.154	0.25	0.168	0.208	-0.025	0.185		0	0.0636	0.153344		0.073	0.094	0.0492494		0.185	0.1572	0.106394		At1g13190	RNA recognition motif (RRM)-containing protein
A000610_01	At1g20350	-0.36	0.151	-0.648	0	0.127	0.929	0.861	1.016	1.109	1.224	1.186	1.261	0.936	0.724	1.228		0	-0.146	0.347079		1.016	1.0278	0.143884		1.186	1.067	0.230504		At1g20350	mitochondrial import inner membrane translocase subunit Tim17, putative similar to SP|Q9SP35 Mitochondrial import inner membrane translocase subunit TIM17 {Arabidopsis thaliana}; contains Pfam profile PF02466: Mitochondrial import inner membrane transloca
A000613_01	At1g13195	0.055	0.25	-0.218	-0.339	0	-0.097	-0.24	-0.097	0.125	0.441	-0.042	-0.135	0.156	0.032	-0.117		0	-0.0504	0.231986		-0.097	0.0264	0.266007		-0.042	-0.0212	0.119154		At1g13195	zinc finger (C3HC4-type RING finger) family protein similar to MTD2 [Medicago truncatula] GI:9294812; contains Pfam profile PF00097: Zinc finger, C3HC4 type (RING finger)
A000618_01	At1g29530	0.253	0	-0.047	-0.206	0.046	-0.367	-0.355	-0.513	-1.018	-0.992	-1.066	-0.67		-0.723	-0.596		0	0.0092	0.166092		-0.513	-0.649	0.331008		-0.697	-0.76375	0.208122		At1g29530	expressed protein
A000619_01	At1g64360	-0.231	0.031	0.737	0	-0.87	-0.047	-0.411	0.224	0.808	1.164	-0.749	-1.459	-0.323	-0.462	-1.013		0	-0.0666	0.577108		0.224	0.3476	0.637365		-0.749	-0.8012	0.453877		At1g64360	expressed protein
A000622_01	At1g10310	-0.096	-0.165	0.023	0.081	0	0.003	-0.261	-0.352	-0.155	-0.185	-0.234	-0.162	-0.314	-0.316	-0.309		0	-0.0314	0.0982359		-0.185	-0.19	0.132083		-0.309	-0.267	0.0679853		At1g10310	short-chain dehydrogenase/reductase (SDR) family protein contains INTERPRO family IPR002198 short-chain dehydrogenase/reductase (SDR) superfamily
A000623_01	At1g64530	-0.022	-0.098	0.602	0.058	0	-0.681	-0.626	-0.579	-0.612	0.102	-1.054	-0.896	-0.757	-0.454	-0.772		0	0.108	0.281752		-0.612	-0.4792	0.32698		-0.772	-0.7866	0.220898		At1g64530	RWP-RK domain-containing protein similar to nodule inception protein [Lotus japonicus] GI:6448579; contains Pfam profile: PF02042 RWP-RK domain
A000627_01	At1g10380	0.032	0.067	-0.133	-0.031	0	-0.247	-0.837	-0.372	-0.183	-0.102	-0.987	-0.816	-0.9	-0.971	-0.551		0	-0.013	0.0763512		-0.247	-0.3482	0.290533		-0.9	-0.845	0.177723		At1g10380	expressed protein
A000629_01	At1g10390	0	-0.207	0.289	0.149	-0.153	0.064	0.059	-0.202	0.058	0.898	0.061	0.034	-0.198	-0.053	0.409		0	0.0156	0.206618		0.059	0.1754	0.41962		0.034	0.0506	0.224371		At1g10390	nucleoporin family protein contains Pfam profiles: PF04096 nucleoporin autopeptidase, PF03093 nucleoporin FG repeat family
A000632_01	At1g01860	0.011	0	-0.418	0.109	-0.069	-0.173	-0.038	-0.095	-0.108	-0.138	-0.034	0.001	0.003	-0.018	0.229		0	-0.0734	0.202823		-0.108	-0.1104	0.0504113		0.001	0.0362	0.108833		At1g01860	dimethyladenosine transferase (PFC1) identical to dimethyladenosine transferase GB:AAC09322 GI:3005590 from [Arabidopsis thaliana]
A000635_01	At1g16250	-0.121	0	-0.758	0.191	0.492	-0.398	-0.25	-0.179	-0.208	-0.808	0.033	0.042	-0.338	-0.198	0.089		0	-0.0392	0.463699		-0.25	-0.3686	0.259684		0.033	-0.0744	0.18476		At1g16250	kelch repeat-containing F-box family protein contains Pfam profiles PF01344: Kelch motif, PF00646: F-box domain
A000636_01	At1g50440	0.064	0	-0.266	-0.173	0.119	-0.237	-0.08	-0.082	-0.137	-0.875	-0.248	-0.197	-0.13	-0.108	-0.203		0	-0.0512	0.162661		-0.137	-0.2822	0.337455		-0.197	-0.1772	0.0571988		At1g50440	zinc finger (C3HC4-type RING finger) family protein contains Pfam profile: PF00097 zinc finger, C3HC4 type (RING finger)
A000637_01	At1g50410	0.057	-0.093	0.126	0	-0.274	0.102	-0.037	-0.219	-0.204	-0.416	-0.408	0.017			-0.412		0	-0.0368	0.154983		-0.204	-0.1548	0.19659		-0.408	-0.267667	0.246537		At1g50410	SNF2 domain-containing protein / helicase domain-containing protein / RING finger domain-containing protein similar to transcription factor RUSH-1alpha [Oryctolagus cuniculus] GI:1655930; contains Pfam profiles PF00271: Helicase conserved C-terminal domai
A000638_01	At1g29330	0	0.161	0.51	-0.391	-0.123	0.238	-0.028	0.113	0.574	0.637	0.315	0.271	0.398	0.399	0.525		0	0.0314	0.335075		0.238	0.3068	0.289314		0.398	0.3816	0.0972152		At1g29330	ER lumen protein retaining receptor (ERD2) / HDEL receptor identical to SP:P35402 ER lumen protein retaining receptor (HDEL receptor) {Arabidopsis thaliana}
A000639_01	At1g16320	-0.116	0.037	-0.732	0	0.304	-0.728	-0.521	-0.463	-0.73	-1.466	-0.194	-0.201	-0.265	-0.328	-0.047		0	-0.1014	0.384596		-0.728	-0.7816	0.401048		-0.201	-0.207	0.104654		At1g16320	expressed protein ESTs gb|T76348, gb|N65615 and gb|Z18119 come from this gene
A000643_01	At1g29220	0.082	-0.073	-0.286	0.095	0	-0.028	0.005	0.017	0.113	0.168	0.225	0.347	0.105	0.079	0.21		0	-0.0364	0.15512		0.017	0.055	0.0821066		0.21	0.1932	0.106968		At1g29220	transcriptional regulator family protein similar to Transcriptional regulator protein HCNGP (Swiss-Prot:Q02614) [Mus musculus]
A000645_01	At1g77610	0	0.17	0.595	-0.081	-0.322	0.247	0.109	0.014	0.101	-0.11	0.105	0.289	0.449	0.316	-0.253		0	0.0724	0.341673		0.101	0.0722	0.131646		0.289	0.1812	0.271958		At1g77610	glucose-6-phosphate/phosphate translocator-related similar to glucose-6-phosphate/phosphate-translocators from [Mesembryanthemum crystallinum] GI:9295277, [Solanum tuberosum] GI:2997593, [Pisum sativum] GI:2997591; contains Pfam profile PF00892: Integral
A000649_01	At1g29120	0.093	-0.046	-0.073	0.175	0	-0.679	-0.92	-0.596	-0.458	-0.542	-0.649	-0.6	-0.57	-0.495	-0.741		0	0.0298	0.102809		-0.596	-0.639	0.176479		-0.6	-0.611	0.0916542		At1g29120	expressed protein
A000659_01	At1g77570	0	0.092	0.721	-0.163	-0.258	0.41	0.459	0.45	0.262	1.314	0.557	0.339	0.934	0.689	0.558		0	0.0784	0.384287		0.45	0.579	0.418424		0.558	0.6154	0.217959		At1g77570	heat shock transcription factor family protein contains Pfam profile: PF00447 HSF-type DNA-binding domain
A000665_01	At1g77710	-0.056	0	-0.052	0.13	0.033	0.052	0.099	0.155	0.136	0.271	0.338	0.085	0.307	0.158	0.424		0	0.011	0.0761971		0.136	0.1426	0.0818431		0.307	0.2624	0.138012		At1g77710	expressed protein similar to hypothetical protein GB:P34661 [Caenorhabditis elegans]
A000668_01	At1g77740	0	-0.18	0.266	0.062	-0.504	0.299	0.213	0.107	0.581	0.279	0.083	-0.07	0.288	0.336	0.069		0	-0.0712	0.289685		0.279	0.2958	0.176162		0.083	0.1412	0.167856		At1g77740	1-phosphatidylinositol-4-phosphate 5-kinase, putative / PIP kinase, putative / PtdIns(4)P-5-kinase, putative / diphosphoinositide kinase, putative strong similarity to phosphatidylinositol-4-phosphate 5-kinase AtPIP5K1 [Arabidopsis thaliana] GI:3702691; c
A000674_01	At1g14205	0.261	0	-0.1	-0.382	0.251	-0.301	-0.225	0.048	-0.518	-0.847	-0.596	-0.3	-0.436	-0.424	-0.179		0	0.006	0.267799		-0.301	-0.3686	0.335385		-0.424	-0.387	0.156751		At1g14205	ribosomal protein L18 family protein similar to SP|P09415 50S ribosomal protein L18 {Bacillus stearothermophilus}
A000677_01	At1g59710	0.156	-0.126	-0.36	0	0.419	0.487	0.353	0.215	0.515	0.44	0.221	0.386	-0.011	-0.06	0.293		0	0.0178	0.293168		0.44	0.402	0.121252		0.221	0.1658	0.193623		At1g59710	expressed protein contains Pfam profile: PF04601 protein of unknown function (DUF569
A000680_01	At1g08530	0.283	0	0.04	-0.572	-0.309	0.033	0.003	-0.176	0.148	0.145	-0.376	-0.135	-0.17	-0.088	0.004		0	-0.1116	0.332446		0.033	0.0306	0.132591		-0.135	-0.153	0.140727		At1g08530	expressed protein
A000685_01	At1g33780	0.048	0.131	-0.663	-0.247	0	0.013	0.049	-0.008	-0.088	-1.33	-0.016	0.242	0.149	-0.04	-0.038		0	-0.1462	0.321392		-0.008	-0.2728	0.593123		-0.016	0.0594	0.128863		At1g33780	expressed protein similar to At3g29240 [Arabidopsis thaliana]; contains Pfam profile PF02622: Uncharacterized ACR, COG1678
A000687_01	At1g59890	0	-0.042	1.024	0.148	-0.528	0.233	0.001	-0.128	0.043	0.165	-0.051	-0.023	0.287	0.239	-0.073		0	0.1204	0.565364		0.043	0.0628	0.141447		-0.023	0.0758	0.172642		At1g59890	paired amphipathic helix repeat-containing protein similar to transcription co-repressor Sin3 [Xenopus laevis] GI:4960210; contains Pfam profile PF02671: Paired amphipathic helix repeat
A000692_01	At1g63010	0.337	-0.033	0	0.313	-0.144	-0.107	-0.135	-0.222	-0.032	-0.96	0.153	0.306	-0.053	-0.089	0.122		0	0.0946	0.21715		-0.135	-0.2912	0.379998		0.122	0.0878	0.161334		At1g63010	SPX (SYG1/Pho81/XPR1) domain-containing protein contains Pfam profile PF03105: SPX domain
A000693_01	At1g34340	0.225	-0.197	0.004	-0.202	0	-0.177	-0.389	-0.686	-0.749	-1.149	-0.92	-0.635	-0.877	-0.781	-0.787		0	-0.034	0.176404		-0.686	-0.63	0.370792		-0.787	-0.8	0.10964		At1g34340	esterase/lipase/thioesterase family protein similar to late embryogenesis abundant protein (EMB8) GI:1350544 SP|Q40863 from (Picea glauca); contains Interpro entry IPR000379 esterase/lipase/thioesterase family
A000694_01	At1g63170	0.111	0.154	-1.31	0	-0.113	0.01	0.061	-0.209	-0.192	-1.473	-0.154	0.054	-0.339	-0.336	-0.574		0	-0.2316	0.611701		-0.192	-0.3606	0.633232		-0.336	-0.2698	0.234502		At1g63170	zinc finger (C3HC4-type RING finger) family protein low similarity to SP|Q06003 Goliath protein (G1 protein) {Drosophila melanogaster}; contains Pfam profile PF00097: Zinc finger, C3HC4 type (RING finger)
A000696_01	At1g68830	0	-0.077	0.332	0.312	-0.054	-0.665	-0.709	-0.352	-0.275	-0.216	-0.642	-0.655	-0.391	-0.433	-0.642		0	0.1026	0.202348		-0.352	-0.4434	0.228075		-0.642	-0.5526	0.129315		At1g68830	protein kinase family protein contains eukaryotic protein kinase domain, INTERPRO:IPR000719
A000697_01	At1g68900	0.089	-0.089	0.453		-0.337	-0.308	-0.105	-0.425	-0.531	0.244	-0.558	-0.383	-0.174	-0.122	-0.17		0	0.029	0.332293		-0.308	-0.225	0.30614		-0.174	-0.2814	0.184515		At1g68900	mandelate racemase/muconate lactonizing enzyme C-terminal domain-containing protein / hydrolase, alpha/beta fold family protein contains Pfam profiles PF01188: Mandelate racemase / muconate lactonizing enzyme, C-terminal domain, PF00561: hydrolase, alpha/
A000698_01	At1g34260	0	0.107	-0.748	-0.004	0.151	0.014	-0.115	-0.104	-0.254	-1.066	-0.11	0.157	-0.198	-0.272	0.095		0	-0.0988	0.369108		-0.115	-0.305	0.435885		-0.11	-0.0656	0.185368		At1g34260	phosphatidylinositol-4-phosphate 5-kinase family protein low similarity to SP|Q9Z1T6 FYVE finger-containing phosphoinositide kinase (EC 2.7.1.68) (1- phosphatidylinositol-4-phosphate kinase) (PIP5K) (PtdIns(4)P-5-kinase) {Mus musculus}; contains Pfam prof
A000706_01	At1g52360	-0.096	0	0.701	0.024	-0.786	0.248	0.227	0.225	0.373	0.391	0.025	-0.263	0.191	0.245	0.175		0	-0.0314	0.527745		0.248	0.2928	0.0821718		0.175	0.0746	0.205608		At1g52360	coatomer protein complex, subunit beta 2 (beta prime), putative contains 7 WD-40 repeats (PF00400) (1 weak); similar to (SP:O55029) Coatomer beta' subunit (Beta'-coat protein) (Beta'-COP) (p102) (SP:O55029) [Mus musculus]; similar to GI:298096 from [Homo
A000710_01	At1g48090	0.078	0	0.991	-0.155	-0.349	0.134	0.145	0.194	0.326	0.74	-0.114	0.029	0.557	0.677	-0.515		0	0.113	0.517239		0.194	0.3078	0.253372		0.029	0.1268	0.491744		At1g48090	C2 domain-containing protein contains Pfam profile: PF00168 C2 domain
A000711_01	At1g15230	-0.248	0.068	-0.223	0	0.061	0.367	0.411	0.357	0.139	0.418	0.639	0.402	0.321	0.38	0.834		0	-0.0684	0.155069		0.367	0.3384	0.114598		0.402	0.5152	0.215503		At1g15230	expressed protein ESTs gb|R30529, gb|Z48463, gb|Z48467, gb|AA597369 and gb|AA394772 come from this gene
A000715_01	At1g56420	0	0.018	0.457	-0.326	-0.03	-0.225	-0.101	0.022	0.105	-0.007	-0.054	-0.046	0.171	0.086	-0.112		0	0.0238	0.279963		-0.007	-0.0412	0.126389		-0.046	0.009	0.115983		At1g56420	expressed protein ; expression supported by MPSS
A000724_01	At1g28090	0	0.079	0.329	-0.115	-0.353	0.105	0.287	0.051	-0.009	-0.279	-0.118	0.192	0.095	0.136	-0.229		0	-0.012	0.250797		0.051	0.031	0.205616		0.095	0.0152	0.179996		At1g28090	polynucleotide adenylyltransferase family protein low similarity to SP|P13685 Poly(A) polymerase (EC 2.7.7.19) {Escherichia coli O157:H7}; contains Pfam profile PF01743: polyA polymerase family protein
A000727_01	At1g49140	0	-0.02	0.122	-0.124	0.191	-0.177	-0.021	0.061	0.006	0.042	-0.009	-0.027	0.153	0.167	0.21		0	0.0338	0.123924		0.006	-0.0178	0.0944812		0.153	0.0988	0.108859		At1g49140	NADH-ubiquinone oxidoreductase-related similar to NADH-ubiquinone oxidoreductase 12 kDa subunit, mitochondrial precursor (EC 1.6.5.3) (EC 1.6.99.3) (Complex I-12KD) (CI-12KD). (Swiss-Prot:Q03015) [Neurospora crassa]
A000731_01	At1g21640	0	-0.087	-0.46	0.556	0.197	-0.302	-0.529	-0.069	-0.184	-1.037	-0.391	-0.394	-0.318	-0.432	-0.271		0	0.0412	0.373707		-0.302	-0.4242	0.382525		-0.391	-0.3612	0.0651514		At1g21640	ATP-NAD kinase family protein contains similarity to NAD kinase [Homo sapiens] gi|20070086|gb|AAM01195; contains Pfam domain, PF01513: ATP-NAD kinase
A000735_01	At1g21690		0.003	-0.348	0.003	-0.003	0.085	-0.262	-0.104	0.066		0.503	0.388	0.032	0.339	0.396		0	-0.08625	0.174523		-0.019	-0.05375	0.162773		0.388	0.3316	0.177849		At1g21690	replication factor C 37 kDa, putative Similar to SWISS-PROT:P35249 activator 1 37 kDa subunit (Replication factor C 37 kDa subunit, A1 37 kDa subunit, RF-C 37 kDa subunit, RFC37) [Homo sapiens]; contains Pfam domain, PF00004: ATPase, AAA family
A000741_01	At1g66130	-0.046	0	-0.033	0.06	0.122	-0.534	-0.414	-0.285	-0.551	-0.475	-0.184	-0.237	-0.247	-0.247	-0.129		0	0.0206	0.0699414		-0.475	-0.4518	0.107688		-0.237	-0.2088	0.0517127		At1g66130	oxidoreductase N-terminal domain-containing protein similar to AX110P [Daucus carota] GI:285739; contains Pfam profile PF01408: Oxidoreductase family NAD-binding Rossmann fold
A000742_01	At1g18450	0	0.274	-0.438	-0.066	0.091	0.385	0.316	-0.039	0.017	-1.269	0.351	0.353	-0.016	0.245	0.154		0	-0.0278	0.262532		0.017	-0.118	0.669072		0.245	0.2174	0.15451		At1g18450	actin-related protein 4 (ARP4) neary identical to actin-related protein 4 (ARP4) [Arabidopsis thaliana] GI:21427463; contains Pfam profile PF00022: Actin; supporting cDNA gi|21427462|gb|AF507912.1|
A000743_01	At1g21840	0.211	0.371	-0.085	-0.125	0	0.417	0.228	0.341	0.351	0.402	0.123	0.321	0.273	0.218	0.122		0	0.0744	0.210556		0.351	0.3478	0.0743888		0.218	0.2114	0.0889624		At1g21840	expressed protein weak similarity to SP|Q07402 Urease accessory protein ureF [strain TB-90] {Bacillus sp.}
A000744_01	At1g31410	0.27	0.043	-0.717	-0.269	0	-0.19	-0.105	0.134	0.063	-0.897	-0.265	-0.238	0.109	0.045	-0.555		0	-0.1346	0.377695		-0.105	-0.199	0.410991		-0.238	-0.1808	0.267094		At1g31410	putrescine-binding periplasmic protein-related similar to Chain A, Putrescine Receptor (Potf) (GI:3891734) [Escherichia coli]; similar to Chain C, Putrescine Receptor (Potf) (GI:3891736) [Escherichia coli]; similar to Putrescine-binding periplasmic protei
A000745_01	At1g51690	-0.055	0	0.114	0.111	-0.031	-0.245	-0.248	-0.264	-0.331	-0.827	-0.168	0.009	-0.269	-0.351	-0.073		0	0.0278	0.0797477		-0.264	-0.383	0.250634		-0.168	-0.1704	0.144927		At1g51690	serine/threonine protein phosphatase 2A (PP2A) 55 kDa regulatory subunit B identical to 55 kDa B regulatory subunit of phosphatase 2A (GI:710330) [Arabidopsis thaliana]; similar to type 2A protein serine/threonine phosphatase 55 kDa B regulatory GI:140846
A000748_01	At1g34760	0	0.068	-0.413	-0.067	0.309	-0.457	-0.303	-0.097	-0.48	-0.83	-0.304	-0.2	-0.139	-0.384	0.079		0	-0.0206	0.261267		-0.457	-0.4334	0.269346		-0.2	-0.1896	0.177266		At1g34760	14-3-3 protein GF14 omicron (GRF11) identical to SP:Q9S9Z8, 14-3-3-like protein GF14 omicron (General regulatory factor 11){Arabidopsis thaliana}
A000757_01	At1g24560	0	-0.023	0.433	0.32	-0.099	-0.102	0.024	0.219	0.013	0.181	0.141	0.192	0.038	0.116	-0.305		0	0.1262	0.234833		0.024	0.067	0.131744		0.116	0.0364	0.198774		At1g24560	expressed protein
A000781_01	At1g33490	0	0.468	-0.472	-0.053	0.113	0.192	0.226	0.281	0.127	-1.481	0.318	0.539	0.167	0.33	0.137		0	0.0112	0.33792		0.192	-0.131	0.756734		0.318	0.2982	0.160146		At1g33490	expressed protein
A000788_01	At1g30900	0.549	0	0.847	-0.393	-0.582	1.026	0.489	1.09	1.592	1.427	0.11	1.022	0.415	0.695	0.21		0	0.0842	0.607564		1.09	1.1248	0.42568		0.415	0.4904	0.371979		At1g30900	vacuolar sorting receptor, putative similar to BP-80 vacuolar sorting receptor [Pisum sativum] GI:1737222
A000789_01	At1g66660	-0.064	0.064	0.405		-0.634	-0.202	-0.028	0.119	0.06		0.365	0.254	0.07	0.059	-0.041		0	-0.05725	0.432459		0.016	-0.01275	0.139879		0.07	0.1414	0.16419		At1g66660	seven in absentia (SINA) protein, putative similar to SIAH2 protein [Brassica napus var. napus] GI:7657878; contains Pfam profile PF03145: Seven in absentia protein family
A000790_01	At1g68600	0.374	-0.168	0.785	0	-0.364	-1.413	-1.83	-1.219	-0.286	0	-2.55	-2.562	-1.716	-1.745	-2.973		0	0.1254	0.457765		-1.219	-0.9496	0.775327		-2.55	-2.3092	0.555142		At1g68600	expressed protein contains Pfam profile PF01027: Uncharacterized protein family UPF0005
A000800_01	At1g67050	0	0.224	-0.776	-0.314	0.1	0.022	0.243	0.413	-0.088	-1.329	-0.23	0.219	-0.237	0.232	-0.105		0	-0.1532	0.401122		0.022	-0.1478	0.68827		-0.105	-0.0242	0.233961		At1g67050	expressed protein
A000801_01	At1g76900	0.04	-0.124	-0.754	0	0.043	0.103	0.093	0.06	-0.249	-0.822	0.077	0.204	-0.052	0.056	0.015		0	-0.159	0.339461		0.06	-0.163	0.396137		0.056	0.06	0.0943531		At1g76900	F-box family protein / tubby family protein similar to Tubby protein (SP:P50586) {Mus musculus}; similar to Chain A, C-Terminal Domain Of Mouse Brain Tubby Protein (GI:6730158) [Mus musculus]; similar to Tubby related protein 1 (Tubby-like protein 1) (Swi
A000802_01	At1g75010	-0.034	0	0.89	0.041	-0.405	-0.172	-0.165	-0.054	0.023	0.753	-0.498	-0.573	-0.008	-0.122	-0.673		0	0.0984	0.477114		-0.054	0.077	0.386529		-0.498	-0.3748	0.292333		At1g75010	MORN (Membrane Occupation and Recognition Nexus) repeat-containing protein /phosphatidylinositol-4-phosphate 5-kinase-related low similarity to phosphatidylinositol-4-phosphate 5-kinase AtPIP5K1 [Arabidopsis thaliana] GI:3702691; contains Pfam profile PF0
A000803_01	At1g67080	0.306	0.506	-0.382	-0.072	0	0.347	0.134	-0.032	-0.079	-0.466	0.049	0.219	0.145	0.277	-0.041		0	0.0716	0.344655		-0.032	-0.0192	0.300393		0.145	0.1298	0.12802		At1g67080	expressed protein
A000806_01	At1g74930	0.038	0	-0.191	0.811	-0.707	1.54	-0.084	1.744	0.814	2.968	1.299	0.049	1.857	-0.002	-0.304		0	-0.0098	0.546584		1.54	1.3964	1.13382		0.049	0.5798	0.94205		At1g74930	AP2 domain-containing transcription factor, putative similar to AP2 domain containing protein RAP2.1 GI:2281627 from [Arabidopsis thaliana]
A000807_01	At1g53380	-0.039	-0.02	0.157	0.089	0	0.128	0.035	-0.031	0.058	0.544	-0.115	-0.08	-0.035	-0.128	-0.366		0	0.0374	0.0829114		0.058	0.1468	0.229194		-0.115	-0.1448	0.128797		At1g53380	expressed protein contains Pfam profile PF04859: Plant protein of unknown function (DUF641
A000808_01	At1g72060	0	-0.091	0.442	-0.264	0.52	1.044	0.941	1.362	1.17	2.128	1.204	1.409	1.145	0.869	2.135		0	0.1214	0.342801		1.17	1.329	0.473429		1.204	1.3524	0.478116		At1g72060	expressed protein
A000809_01	At1g74890	0.324	-0.155	0	-0.937	0.041	-0.826	-0.153	-0.595	-0.433	-0.064	-0.841	-1.48	-0.979	-1.313	-0.857		0	-0.1454	0.475117		-0.433	-0.4142	0.313643		-0.979	-1.094	0.287385		At1g74890	two-component responsive regulator / response regulator 15 (ARR15) identical to response regulator 15 GI:11870065 from [Arabidopsis thaliana]; contains Pfam profile: PF00072 response regulator receiver domain
A000812_01	At1g74860	0.048	0	-0.727	-0.25	0.098	0.01	-0.028	-0.063	-0.242	-0.692	0.217	0.435	-0.093	-0.237	-0.17		0	-0.1662	0.34089		-0.063	-0.203	0.289929		-0.093	0.0304	0.285224		At1g74860	expressed protein
A000814_01	At1g74840	0	0.072	-0.865	-0.077	0.2	-0.167	-0.168	0.004	-0.643	-2.301	0.05	-0.061	-0.184	-0.27	-0.216		0	-0.134	0.421176		-0.168	-0.655	0.951191		-0.184	-0.1362	0.129307		At1g74840	myb family transcription factor similar to myb-related transcription activator GI:9279717 from [Arabidopsis thaliana]
A000816_01	At1g26620		0	0.946	-0.03		0.041	-0.109	0.135	0.458	1.752	-0.189	0.023	0.515	0.377	-0.033		0	0.305333	0.555036		0.135	0.4554	0.754007		0.023	0.1386	0.29523		At1g26620	expressed protein ; expression supported by MPSS
A000825_01	At1g80120		-0.041	-0.252	0.504	0.041	0.915	0.777	0.883	1.203	1.471	0.898	0.561	0.592	0.51	1.031		0	0.063	0.318855		0.915	1.0498	0.283413		0.592	0.7184	0.231386		At1g80120	expressed protein contains Pfam profile PF04525: Protein of unknown function (DUF567)
A000827_01	At1g80160	0.823	-0.039	-0.225	0.325	0	0.413	0.058	-0.399	-0.148	-0.887	1.426	0.925	0.895	0.684	1.567		0	0.1768	0.411949		-0.148	-0.1926	0.488961		0.925	1.0994	0.377515		At1g80160	lactoylglutathione lyase family protein / glyoxalase I family protein contains glyoxalase family protein domain, Pfam:PF00903
A000828_01	At1g80180	-0.198	0	-0.917	0.185	0.118	-0.08	0.129	0.152	-0.166	-0.452	0.372	0.384	0.05	0.053	0.405		0	-0.1624	0.446199		-0.08	-0.0834	0.24659		0.372	0.2528	0.184143		At1g80180	expressed protein
A000835_01	At1g26470	0.076	0	0.384	-0.077	-0.031	0.593	0.656	0.254	0.364	0.311	0.627	0.589	0.69	0.694	0.721		0	0.0704	0.183944		0.364	0.4356	0.178172		0.69	0.6642	0.0543572		At1g26470	expressed protein
A000839_01	At1g28960	-0.136	0	-0.651	0.032	0.199	-0.39	-0.205	-0.13	-0.279	-0.869	0.04	0.196	-0.21	-0.121	0.385		0	-0.1112	0.324459		-0.279	-0.3746	0.292575		0.04	0.058	0.239876		At1g28960	MutT/nudix family protein similar to coenzyme A diphosphatase [Mus musculus] GI:12746410; contains Pfam profile PF00293: NUDIX domain
A000842_01	At1g70770	0.097	0	-0.075	0.379	-0.213	0.387	0.284	0.483	0.645	0.385	0.363	0.171	0.32	0.598	0.418		0	0.0376	0.221909		0.387	0.4368	0.136008		0.363	0.374	0.155208		At1g70770	expressed protein
A000844_01	At1g26370	-0.328	0	0.16	-0.027	0.119	-0.108	-0.301	-0.146	-0.174		0.035	0.158	0.132	0.123	-0.309		0	-0.0152	0.19165		-0.16	-0.18225	0.0836595		0.123	0.0278	0.193881		At1g26370	RNA helicase, putative similar to SP|Q14562 ATP-dependent helicase DDX8 (RNA helicase HRH1) (DEAH-box protein 8) {Homo sapiens}; contains Pfam profiles PF04408: Helicase associated domain (HA2), PF00271: Helicase conserved C-terminal domain
A000851_01	At1g52710	-0.052	0.805	0.75	-0.113	0	0.992	1.329	0.732	1.196	1.104	1.284	0.985	1.139	1.314	1.369		0	0.278	0.458142		1.104	1.0706	0.226075		1.284	1.2182	0.155646		At1g52710	cytochrome c oxidase-related similar to SP|P00428 Cytochrome c oxidase polypeptide Vb (EC 1.9.3.1) (VI) [Bovine] {Bos taurus}
A000856_01	At1g27300	-0.1	-0.265	0.257	0	0.171	0.093	0.111	-0.159	-0.055	0.311	0.557	0.408	0.327	0.216	1.013		0	0.0126	0.208998		0.093	0.0602	0.178799		0.408	0.5042	0.310394		At1g27300	expressed protein
A000870_01	At1g72810	-0.152	0.152	-0.376	0.244		0.021	-0.171	-0.369	-0.562		-0.12	-0.319	-0.249	-0.491	-0.46		0	-0.033	0.284467		-0.27	-0.27025	0.251361		-0.319	-0.3278	0.152953		At1g72810	threonine synthase, putative strong similarity to SP|Q9S7B5 Threonine synthase, chloroplast precursor (EC 4.2.3.1) (TS) {Arabidopsis thaliana}
A000872_01	At1g25390	-0.068	0.052	-0.137	0	0.107	0.035	0.242	0.507	1.088	0.327	0.268	0.273	0.471	0.048	0.278		0	-0.0092	0.0963364		0.327	0.4398	0.400122		0.273	0.2676	0.149778		At1g25390	protein kinase family protein contains protein kinase domain, Pfam:PF00069
A000875_01	At1g72880	-0.248	-0.228	0.108	0	0.132	-0.387	-0.341	-0.307	-0.406	-0.001	-0.687	-0.598	-0.523	-0.457	-0.439		0	-0.0472	0.181271		-0.341	-0.2884	0.165275		-0.523	-0.5408	0.102894		At1g72880	acid phosphatase survival protein SurE, putative similar to Swiss-Prot:P36664 acid phosphatase surE (EC 3.1.3.2) (Stationary-phase survival protein surE) [Escherichia coli O157:H7]; contains Pfam domain PF01975: Survival protein SurE
A000879_01	At1g25520	0.065	0.215	-0.703	0	-0.127	-0.06	-0.106	0.002	-0.138	-1.145	0.104	0.304	0.265	0.203	0.114		0	-0.11	0.353655		-0.106	-0.2894	0.481183		0.203	0.198	0.088941		At1g25520	expressed protein contains Pfam profile PF01169: Uncharacterized protein family UPF0016
A000880_01	At1g25480	-0.116	0	0.421	0.025	-0.253	-0.214	-0.111	0.061	0.086	0.319	-0.314	-0.073	-0.095	0.032	-0.495		0	0.0154	0.252064		0.061	0.0282	0.20434		-0.095	-0.189	0.212364		At1g25480	expressed protein contains Pfam profile PF01027: Uncharacterized protein family UPF0005
A000888_01	At1g50730	0	0.214	0.662	-0.404	-0.092	-0.879	-0.375	-0.262	-0.871	-0.552	-1.142	-0.82	-0.378	-0.845	-0.903		0	0.076	0.395866		-0.552	-0.5878	0.281829		-0.845	-0.8176	0.276827		At1g50730	expressed protein
A000891_01	At1g29710		0.24	0.629	-0.24	-0.313	-0.042	-0.017	0.07	0.118	0.418	-0.013	0.087	0.372	0.36	-0.18		0	0.079	0.441152		0.07	0.1094	0.184228		0.087	0.1252	0.23966		At1g29710	pentatricopeptide (PPR) repeat-containing protein contains Pfam profile PF01535: PPR repeat
A000893_01	At1g02960	0.346	0.577	-0.51	0	-0.136	0.252	0.496	0.518	0.38	-1.561	0.273	0.518	0.684	0.637	-0.129		0	0.0554	0.423053		0.38	0.017	0.888471		0.518	0.3966	0.334164		At1g02960	expressed protein
A000895_01	At1g17760		-0.15	0.524	0.15	-0.388	-0.114	-0.387	0.205	0.222	1.066	0.086	0.218	0.316	0.269	0.07		0	0.034	0.39391		0.205	0.1984	0.546264		0.218	0.1918	0.109659		At1g17760	suppressor of forked protein family protein / SUF family protein Contains Pfam PF05843: Suppressor of forked protein (Suf); identical to cleavage stimulation factor 77 (GI:21591637) [Arabidopsis thaliana]; similar to suppressor of forked protein; Su(f) pr
A000897_01	At1g02870	-0.023	0.125	-0.772	0	0.122	0.434	0.178	0.017	0.014	-0.371	0.542	0.641	0.169	0.289	0.549		0	-0.1096	0.376484		0.017	0.0544	0.292989		0.542	0.438	0.199316		At1g02870	expressed protein
A000902_01	At1g58200	0.104	-0.084	0.144	0	-0.113	-0.13	-0.107	-0.034	0.001	-0.528	-0.221	-0.156	-0.35	-0.252	-0.344		0	0.0102	0.112757		-0.107	-0.1596	0.212679		-0.252	-0.2646	0.082842		At1g58200	mechanosensitive ion channel domain-containing protein / MS ion channel domain-containing protein contains Pfam profile PF00924: Mechanosensitive ion channel
A000903_01	At1g28310	0.007	0.107	0	-0.135	-0.167	0.091	0.019	0.123	0.057	-0.183	-0.149	0.143	0.237	0.277	-0.011		0	-0.0376	0.112409		0.057	0.0214	0.120643		0.143	0.0994	0.17767		At1g28310	Dof-type zinc finger domain-containing protein
A000909_01	At1g11410	-0.231	-0.33	0.266	0	0.264	-1.165	-0.852	-0.45	-0.599	0.063	-1.26	-1.061	-0.884	-1.105	-1.276		0	-0.0062	0.275009		-0.599	-0.6006	0.459564		-1.105	-1.1172	0.160701		At1g11410	S-locus protein kinase, putative similar to receptor-like protein kinase [Arabidopsis thaliana] gi|4008008|gb|AAC95352; contains S-locus glycoprotein family domain, Pfam:PF00954
A000910_01	At1g31920	0.247	0	0.076	-0.137	-0.254	-0.797	-0.68	-0.571	-0.947	-0.817	-0.702	-0.545	-0.338	-0.463	-0.986		0	-0.0136	0.193097		-0.797	-0.7624	0.142898		-0.545	-0.6068	0.249803		At1g31920	pentatricopeptide (PPR) repeat-containing protein contains Pfam profile PF01535: PPR repeat
A000912_01	At1g28240	-0.055	-0.334	0.028	0.028	0	-0.257	-0.283	-0.16	0.123	-0.624	-0.212		-0.069	-0.214	-0.139		0	-0.0666	0.153274		-0.257	-0.2402	0.268218		-0.176	-0.1585	0.0691207		At1g28240	expressed protein
A000914_01	At1g31930	0	-0.215	0.84	0.253	-0.397	-0.217	-0.314	-0.248	0.143	0.399	-0.587	-0.448	-0.325	-0.469	-0.236		0	0.0962	0.481449		-0.217	-0.0474	0.306433		-0.448	-0.413	0.135748		At1g31930	extra-large guanine nucleotide binding protein, putative / G-protein, putative similar to extra-large G-protein (XLG) [Arabidopsis thaliana] GI:3201680; contains Pfam profile PF00503: G-protein alpha subunit
A000919_01	At1g26160	0.128	0.239	0	-0.005	-0.095	0.057	0.198	0.176	-0.126	-1.124	0.136	0.406	0.065	0.215	-0.186		0	0.0534	0.130669		0.057	-0.1638	0.551935		0.136	0.1272	0.216494		At1g26160	metal-dependent phosphohydrolase HD domain-containing protein contains Pfam profile PF01966: HD domain
A000927_01	At1g80810	0.149	-0.149	0.28	-0.727		-0.112	-0.389	-0.521	-0.378	0.015	-0.625	-0.115	-0.528	-0.49	-0.383		0	-0.11175	0.447727		-0.378	-0.277	0.220664		-0.49	-0.4282	0.19535		At1g80810	expressed protein similar to androgen-induced prostate proliferative shutoff associated protein (GI:4559410) [Homo sapiens]; similar to bimD (GI:168025) [Emericella nidulans]
A000936_01	At1g80940	0.024	-0.006	0.165	-0.03	0	-0.022	-0.015	-0.121	-0.094	0.209	0.114	0.232	0.005	-0.139	0.062		0	0.0306	0.0775487		-0.022	-0.0086	0.129901		0.062	0.0548	0.136926		At1g80940	expressed protein
A000937_01	At1g80950	0.131	0.155	0	-0.095	-0.041	0.18	0.337	0.337	0.021	-0.65	0.381	0.675	0.548	0.195	0.112		0	0.03	0.108849		0.18	0.045	0.409986		0.381	0.3822	0.235199		At1g80950	phospholipid/glycerol acyltransferase family protein low similarity to SP|Q59601 1-acyl-sn-glycerol-3-phosphate acyltransferase (EC 2.3.1.51) {Neisseria gonorrhoeae}; contains Pfam profile PF01553: Acyltransferase
A000941_01	At1g56180	-0.132	0	-0.745	0.435	0.3	-0.123	-0.127	-0.045	-0.269	-0.564	0.213	0.207	-0.105	-0.259	0.446		0	-0.0284	0.460337		-0.127	-0.2256	0.205708		0.207	0.1004	0.280553		At1g56180	expressed protein
A000942_01	At1g16840	-0.144	0	-0.557	0.027	0.047	0.273	0.433	0.47	0.313	0.03	0.388	0.506	0.195	0.246	0.898		0	-0.1254	0.252635		0.313	0.3038	0.173432		0.388	0.4466	0.280298		At1g16840	expressed protein
A000943_01	At1g26170	-0.197	-0.206	0.214	0.13	0	-0.087	-0.109	-0.115	-0.016	0.506	-0.051	-0.103	-0.029	-0.09	0.229		0	-0.0118	0.189238		-0.087	0.0358	0.265781		-0.051	-0.0088	0.136203		At1g26170	importin beta-2 subunit family protein similar to Importin9 isoform 1 [Mus musculus] GI:15186756; contains Pfam profile PF03810: Importin-beta N-terminal domain
A000946_01	At1g26180	0.025	0.01	-0.774	-0.274	0	-0.329	-0.15	-0.26	-0.463	-1.042	-0.245	0.005	-0.032	-0.207	0.206		0	-0.2026	0.342653		-0.329	-0.4488	0.350488		-0.032	-0.0546	0.181282		At1g26180	expressed protein
A000953_01	At1g67350	-0.011	0	-0.41	0.075	0.026	0.126	0.114	0.079	0.092	-0.049	-0.005	-0.075	0.126	0.006	0.09		0	-0.064	0.196241		0.092	0.0724	0.0703015		0.006	0.0284	0.0800456		At1g67350	expressed protein contains similarity to MHC class II antigen GI:9502037 from [Aotus nancymaae]
A000955_01	At1g67410	-0.213	-0.214	0.497	0.002	0	-0.096	-0.085	-0.073	0.002	0.536	-0.477	-0.47	-0.323	-0.424	-0.348		0	0.0144	0.290319		-0.073	0.0568	0.270619		-0.424	-0.4084	0.070152		At1g67410	exostosin family protein contains Pfam profile: PF03016 Exostosin family
A000956_01	At1g54310	0.07	-0.07	-0.585	0.542		-0.1	-0.097	-0.059	-0.376		0.082	-0.041	0.127	0.242	0.354		0	-0.01075	0.463798		-0.099	-0.158	0.146526		0.127	0.1528	0.151389		At1g54310	expressed protein
A000960_01	At1g47200	-0.076	0	-0.241	0.116	0.35	0.105	0.088	0.053	0.191	-0.205	0.277	-0.005	0.187	0.13	0.83		0	0.0298	0.221005		0.088	0.0464	0.149432		0.187	0.2838	0.322029		At1g47200	MFP1 attachment factor, putative contains similarity to MFP1 attachment factor 1 GI:7546725 from [Lycopersicon esculentum] similar to MFP1 attachment factor 1 [Glycine max] gi|7546729|gb|AAF63659
A000962_01	At1g29880	0	-0.236	0.17	0.246	-0.074	0.115	-0.173	-0.388	-0.175	-0.045	-0.202	-0.006	-0.341	-0.364	-0.019		0	0.0212	0.192575		-0.173	-0.1332	0.185497		-0.202	-0.1864	0.17048		At1g29880	glycyl-tRNA synthetase / glycine--tRNA ligase identical to SP|O23627 Glycyl-tRNA synthetase (EC 6.1.1.14) (Glycine--tRNA ligase) (GlyRS) {Arabidopsis thaliana}
A000974_01	At1g06690	0.162	0	-0.386	-0.186	0.005	-0.786	-0.477	-0.29	-0.56	-0.689	-0.761	-0.804	-0.507	-0.618	-0.657		0	-0.081	0.21039		-0.56	-0.5604	0.192032		-0.657	-0.6694	0.11798		At1g06690	aldo/keto reductase family protein contains Pfam profile PF00248: oxidoreductase, aldo/keto reductase family
A000975_01	At1g80640	-0.142	-0.035	0	0.079	0.137	-0.091	-0.182	-0.295	-0.413	0.401	-0.49	-0.734	-0.472	-0.584	-0.295		0	0.0078	0.107348		-0.182	-0.116	0.313257		-0.49	-0.515	0.160932		At1g80640	protein kinase family protein contains protein kinase domain, Pfam:PF00069
A000979_01	At1g54920	0	-0.028	0.394	0.19	-0.016	-0.312	-0.219	-0.151	0.06	0.384	-0.263	-0.441	0.111	0.16	-0.012		0	0.108	0.183068		-0.151	-0.0476	0.277414		-0.012	-0.089	0.255983		At1g54920	expressed protein
A000984_01	At1g28490	0	0.027	0.434	-0.211	-0.175	0.179	0.237	0.45	0.383	0.242	0.164	0.228	0.267	0.21	0.118		0	0.015	0.256469		0.242	0.2982	0.113299		0.21	0.1974	0.057791		At1g28490	syntaxin 61 (SYP61) / osmotic stess-sensitive mutant 1 (OSM1) identical to SP|Q946Y7 Syntaxin 61 (AtSYP61) (Osmotic stess-sensitive mutant 1) {Arabidopsis thaliana}; identical to cDNA syntaxin of plants 61 (SYP61) GI:16041649
A000985_01	At1g66900	0	0.053	-0.784	-0.016	0.112	-0.566	-0.392	0.252	-0.151	-1.041	-0.118	-0.248	-0.078	-0.124	-0.156		0	-0.127	0.370682		-0.392	-0.3796	0.480501		-0.124	-0.1448	0.0640094		At1g66900	expressed protein
A000987_01	At1g15940		-0.169	1.075	0.169	-0.246	0.39		-0.191	0.03	0.831	0.036	0.536	-0.061	-0.124	0.132		0	0.20725	0.60593		0.21	0.265	0.446894		0.036	0.1038	0.260404		At1g15940	expressed protein similar To androgen-induced prostate proliferative shutoff associated protein (GI:4559410) [Homo sapiens]
A000988_01	At1g15980	0.095	0	-0.503	-0.165	0.032	-0.966	-0.839	-0.694	-0.831	-1.626	-1.453	-1.388	-0.989	-1.123	-1.596		0	-0.1082	0.2407		-0.839	-0.9912	0.367683		-1.388	-1.3098	0.248163		At1g15980	expressed protein
A000992_01	At1g14900	-0.055	0.202	0.161	0	-0.026	0.961	0.502	-0.268	0.124	0.139	0.46	0.337	0.106	0.142	0.332		0	0.0564	0.116749		0.139	0.2916	0.462843		0.332	0.2754	0.147959		At1g14900	high-mobility-group protein / HMG-I/Y protein nearly identical to high-mobility-group protein HMG-I/Y protein [Arabidopsis thaliana] GI:1429211; contains Pfam profiles PF00538: linker histone H1 and H5 family, PF02178: AT hook motif
A000993_01	At1g30250	0	-0.26	-0.685	0.445	0.544	-0.355	-0.384	-0.353	-0.089	0.626	0.421	-0.245	0.015	0.249	0.873		0	0.0088	0.507543		-0.353	-0.111	0.429034		0.249	0.2626	0.423328		At1g30250	expressed protein
A000994_01	At1g16060	-0.127	0.081	0.218	-0.081		0.351	0.274	0.041	0.649	1.464	-0.012	-0.167	-0.036	-0.116	0.218		0	0.02275	0.157802		0.351	0.5558	0.552242		-0.036	-0.0226	0.148118		At1g16060	ovule development protein, putative similar to ovule development protein AINTEGUMENTA (GI:1209099)[Arabidopsis thaliana]
A000997_01	At1g16180	-0.008	0	-0.496	0.193	0.097	0.241	0.164	0.315	0.456	0.072	0.286	0.362	0.241	0.257	0.646		0	-0.0428	0.266261		0.241	0.2496	0.146476		0.286	0.3584	0.167357		At1g16180	TMS membrane family protein / tumour differentially expressed (TDE) family protein contains Pfam domain, PF03348: TMS membrane protein/tumour differentially expressed protein (TDE)
A000999_01	At1g16610	-0.113	-0.205	0.112	0.267	0	-0.085	-0.243	-0.28	0.025	0.235	0.072	-0.172	-0.257	-0.053	0.622		0	0.0122	0.185663		-0.085	-0.0696	0.209942		-0.053	0.0424	0.346959		At1g16610	arginine/serine-rich protein, putative (SR45) similar to arginine/serine-rich protein GI:6601502 from [Arabidopsis thaliana]
A001005_01	At1g30500	0.077	0.051	-0.076	0	-0.049	-0.499	-0.273	-0.297	-0.397	-0.061	-0.031	-0.092	-0.207	-0.103	-0.163		0	0.0006	0.0646243		-0.297	-0.3054	0.163343		-0.103	-0.1192	0.0678395		At1g30500	CCAAT-binding transcription factor (CBF-B/NF-YA) family protein contains Pfam profile: PF02045 CCAAT-binding transcription factor (CBF-B/NF-YA)
A001006_01	At1g75310	0.124	-0.088	0.331	-0.138	0	0.463	0.501	0.299	0.453	0.704	-0.098	-0.025	0.069	-0.061	0.123		0	0.0458	0.187907		0.463	0.484	0.145186		-0.025	0.0016	0.0919609		At1g75310	DNAJ heat shock N-terminal domain-containing protein low similarity to SP|Q27974 Auxilin {Bos taurus}; contains Pfam profile PF00226: DnaJ domain
A001007_01	At1g76580		-0.13	0.598	0.13	-0.916	0.492	0.301	0.746	0.821	1.275	0.305	0.381	0.205	0.47	0.433		0	-0.0795	0.633819		0.746	0.727	0.369527		0.381	0.3588	0.105963		At1g76580	SPL1-Related3 protein (SPL1R3) identical to cDNA partial mRNA for SPL1-Related3 protein (SPL1R3 gene) GI:6006428
A001009_01	At1g51110	0.092	0.123	-0.905	-0.09	0	-0.676	-0.53	-0.38	-0.621	-2.7	-0.888	-0.644	-0.598	-0.63	-0.741		0	-0.156	0.426919		-0.621	-0.9814	0.967237		-0.644	-0.7002	0.117755		At1g51110	plastid-lipid associated protein PAP / fibrillin family protein similar to plastid-lipid associated protein PAP2 [Brassica rapa] GI:14248550; contains Pfam profile PF04755: PAP_fibrillin
A001011_01	At1g69170	-0.1	0.424	0.715	-0.086	0	0.11	0.032	0.032	0.036	-0.086	-0.438	0.059	0.084	0.178	-0.521		0	0.1906	0.36289		0.032	0.0248	0.0702937		0.059	-0.1276	0.325614		At1g69170	squamosa promoter-binding protein-like 6 (SPL6) identical to squamosa promoter binding protein-like 6 [Arabidopsis thaliana] GI:5931683; contains Pfam profile PF03110: SBP domain
A001012_01	At1g27360	-0.437	-0.113	0.363	0.109	0	-0.109	-0.172	-0.576	-0.496	0.038	-0.594	-0.307	-0.742	-0.89	-0.368		0	-0.0156	0.294182		-0.172	-0.263	0.262134		-0.594	-0.5802	0.245974		At1g27360	squamosa promoter-binding protein-like 11 (SPL11) identical to squamosa promoter binding protein-like 11 [Arabidopsis thaliana] GI:5931665; contains Pfam profile PF03110: SBP domain
A001013_01	At1g51090	-0.791	0.471	-0.471	1.357		1.891	1.855	2.825	2.263	2.152	1.781	0.788	0.933	0.663			0	0.1415	0.971378		2.152	2.1972	0.390949		0.86	1.04125	0.505357		At1g51090	heavy-metal-associated domain-containing protein contains Pfam profile PF00403: Heavy-metal-associated domain
A001015_01	At1g59590	0.194	0	-0.43	-0.28	0.283	0.16	0.238	1.135	1.384	0.045	-0.007	0.336	0.448	0.223	-0.031		0	-0.0466	0.304207		0.238	0.5924	0.619125		0.223	0.1938	0.210087		At1g59590	expressed protein
A001017_01	At1g09140	-0.187	0	-1.154	0.128	0.065	-0.193	-0.238	-0.226	-0.301	-1.374	0.017	0.12	-0.381	-0.234	-0.102		0	-0.2296	0.530027		-0.238	-0.4664	0.508872		-0.102	-0.116	0.198576		At1g09140	SF2/ASF-like splicing modulator (SRP30) nearly identical to SF2/ASF-like splicing modulator Srp30 [Arabidopsis thaliana] GI:4775270
A001019_01	At1g01170	0	0.104	0.484	-0.091	-0.002	0.287	0.464	0.315	0.024	0.456	0.426	0.431	0.478	0.255	0.266		0	0.099	0.226027		0.315	0.3092	0.178451		0.426	0.3712	0.103144		At1g01170	ozone-responsive stress-related protein, putative similar to stress-related ozone-induced protein AtOZI1 (GI:790583) [Arabidopsis thaliana]; contains 1 predicted transmembrane domain;
A001027_01	At1g18850	0.052	0.293	-0.111	0	-0.454	0.544	0.29	-0.207	0.154	-0.275	0.464	0.507	0.162	0.47	0.347		0	-0.044	0.272631		0.154	0.1012	0.343154		0.464	0.39	0.140888		At1g18850	expressed protein
A001028_01	At1g18810	0.141	0.005	-0.874	-0.012	0	-0.883	-0.391	-0.188	-0.947	-2.035	-0.485	-0.141	-0.534	-0.218	-0.309		0	-0.148	0.410611		-0.883	-0.8888	0.716959		-0.309	-0.3374	0.168874		At1g18810	phytochrome kinase substrate-related contains weak similarity to Swiss-Prot:Q9SWI1 phytochrome kinase substrate 1 [Arabidopsis thaliana]
A001031_01	At1g26130	0	0.008	0.976	-0.033	-0.327	0.136	-0.211	-0.108	0.502	1.074	-0.381	-0.105	0.073	0.101	-0.2		0	0.1248	0.495677		0.136	0.2786	0.522511		-0.105	-0.1024	0.199554		At1g26130	haloacid dehalogenase-like hydrolase family protein similar to Potential phospholipid-transporting ATPase (EC 3.6.3.1) from Homo sapiens [SP|Q9Y2Q0, SP|O43520], Mus musculus [SP|P98200, SP|P70704], {Bos taurus} SP|Q29449; contains InterPro accession IPR00
A001032_01	At1g18640	0	-0.081	0.02	-0.091	0.025	0.153	0.018	-0.16	-0.09	-0.097	-0.1	-0.25	-0.179	-0.163	-0.053		0	-0.0254	0.0562165		-0.09	-0.0352	0.123133		-0.163	-0.149	0.0756869		At1g18640	3-phosphoserine phosphatase (PSP) nearly identical to 3-phosphoserine phosphatase GI:3759177 from [Arabidopsis thaliana]
A001033_01	At1g51660	0.002	-0.051	0	-0.076	0.316	0.486	0.24	0.681	1.149	1.086	0.365	-0.112	0.075	-0.225	-0.132		0	0.0382	0.158856		0.681	0.7284	0.38869		-0.112	-0.0058	0.234134		At1g51660	mitogen-activated protein kinase kinase (MAPKK), putative (MKK4) identical to MAP kinase kinase 4 [Arabidopsis thaliana] gi|3219271|dbj|BAA28830 gi_13265419
A001034_01	At1g18700	-0.026	-0.183	0.629	0.284	0	0.365	0.199	0.108	-0.034	0.174	0.174	0.305	0.049	0.174	0.452		0	0.1408	0.320678		0.174	0.1624	0.14496		0.174	0.2308	0.153247		At1g18700	DNAJ heat shock N-terminal domain-containing protein low similarity to SP|Q9QYI8 DnaJ homolog subfamily B member 7 Mus musculus; contains Pfam profile PF00226 DnaJ domain
A001035_01	At1g25682	0	-0.153	0.322	-0.069	0.027	0.09	0.07	0.307	0.259	0.102	0.266	0.277	0.168	0.037	-0.018		0	0.0254	0.179831		0.102	0.1656	0.109107		0.168	0.146	0.133062		At1g25682	cell cycle control protein-related contains similarity to Swiss-Prot:Q9P7C5 cell cycle control protein cwf16 [Schizosaccharomyces pombe]
A001036_01	At1g49720	-0.353	0	0.3	0.295	-0.498	0.505	0.601	0.561	-0.105	0.108	0.737	0.795	0.502	0.717	0.64		0	-0.0512	0.366241		0.505	0.334	0.314585		0.717	0.6782	0.113038		At1g49720	ABA-responsive element-binding protein / abscisic acid responsive elements-binding factor (ABRE) identical to abscisic acid responsive elements-binding factor GB:AAF27179 GI:6739274 from [Arabidopsis thaliana]; identical to cDNA abscisic acid responsive e
A001039_01	At1g66680	-0.283	0.012	-0.961	0	0.212	0.248	0.271	0.265	0.157	-0.888	0.652	0.647	0.399	0.51	0.67		0	-0.204	0.458426		0.248	0.0106	0.504431		0.647	0.5756	0.117619		At1g66680	S locus-linked protein, putative similar to S locus-linked protein SLL2 [Brassica napus] GI:1518113
A001041_01	At1g68010	-0.026	-0.242	0.101	0	0.081	-0.301	-0.403	-0.316	-0.267	-0.266	-0.33	-0.446	-0.64	-0.616	-0.169		0	-0.0172	0.136494		-0.301	-0.3106	0.0560116		-0.446	-0.4402	0.197834		At1g68010	glycerate dehydrogenase / NADH-dependent hydroxypyruvate reductase identical to hydroxypyruvate reductase (HPR) GB:D85339 [Arabidopsis thaliana] (Plant Cell Physiol 1997 Apr;38(4):449-55)
A001042_01	At1g05810	-0.129	0	0.148	-0.087	0.248	-0.693	-0.509	-0.319	-0.518	-0.398	-0.588	-0.629	-0.551	-0.569	-0.642		0	0.036	0.159011		-0.509	-0.4874	0.141444		-0.588	-0.5958	0.0388034		At1g05810	Ras-related protein (ARA-1) (ARA) / small GTP-binding protein, putative nearly identical to SP:P19892 Ras-related protein ARA-1 [Arabidopsis thaliana] (Gene 76:313-319(1989))
A001043_01	At1g64740	0.027	-0.114	-0.868	0.072	0	0.125	0.224	0.02	-0.236	-1.525	0.342	0.508	-0.06	0.084	0.165		0	-0.1766	0.392554		0.02	-0.2784	0.717633		0.165	0.2078	0.221926		At1g64740	tubulin alpha-1 chain (TUA1) nearly identical to SP|P11139 Tubulin alpha-1 chain {Arabidopsis thaliana}
A001044_01	At1g75040	0.944	0	0.195	-0.231	-0.312	2.077	1.677	1.608	2.441	2.349	1.206	1.976	1.349	1.647	1.413		0	0.1192	0.502201		2.077	2.0304	0.379336		1.413	1.5182	0.301386		At1g75040	pathogenesis-related protein 5 (PR-5) identical to SP|P28493 Pathogenesis-related protein 5 precursor (PR-5) {Arabidopsis thaliana}; contains Pfam profile: PF00314 Thaumatin family
A001045_01	At1g64040	-0.048	-0.117	0.044	0	0.146	0.071	-0.039	-0.158	-0.12	0.016	0.189	0.171	-0.062	-0.04	0.189		0	0.005	0.0988939		-0.039	-0.046	0.0943425		0.171	0.0894	0.128613		At1g64040	serine/threonine protein phosphatase PP1 isozyme 3 (TOPP3) / phosphoprotein phosphatase 1 identical to SP|P48483 Serine/threonine protein phosphatase PP1 isozyme 3 (EC 3.1.3.16) {Arabidopsis thaliana}, phosphoprotein phosphatase 1 GB:AAA32838 GI:166799 fr
A001047_01	At1g05870	-0.239	0	-0.182	0.193	0.039	-0.393	-0.357	-0.425	-0.784	-0.527	-0.379	-0.226	-0.612	-0.46	-0.291		0	-0.0378	0.17455		-0.425	-0.4972	0.172387		-0.379	-0.3936	0.150779		At1g05870	expressed protein
A001052_01	At1g14980	0.25	0	-0.103	0.112	-0.008	0.757	0.755	0.38	0.716	0.965	0.789	0.66	0.388	0.499	0.762		0	0.0502	0.135201		0.755	0.7146	0.211003		0.66	0.6196	0.172329		At1g14980	10 kDa chaperonin (CPN10) identical to SP:P34893 from [Arabidopsis thaliana]
A001053_01	At1g05790	-0.51	-0.303	0.549	0.011	0	-0.497	-0.524	-0.554	-0.276	0.273	-0.33	-0.438	-0.621	-0.192	-0.231		0	-0.0506	0.400197		-0.497	-0.3156	0.346839		-0.33	-0.3624	0.173163		At1g05790	lipase class 3 family protein contains Pfam profile PF01764: Lipase
A001065_01	At1g07135	0	-0.035	-0.918	0.458	0.297	1.384	1.024	2.155	2.179	2.209	0.814	-0.588	0.919	-0.018	0.009		0	-0.0396	0.532466		2.155	1.7902	0.550386		0.009	0.2272	0.631507		At1g07135	glycine-rich protein
A001069_01	At1g26640	0.153	0.023	-0.671	0	-0.077	0.206	0.149	0.214	0.009	-0.927	-0.282	0.034	-0.112	0.021	-0.198		0	-0.1144	0.321975		0.149	-0.0698	0.48618		-0.112	-0.1074	0.137109		At1g26640	aspartate/glutamate/uridylate kinase family protein contains Pfam amino acid kinase family PF00696
A001071_01	At1g32870	0	0.083	0.385	-0.069	-0.176	0.041	0.096	-0.042	0.098	0.201	0.034	-0.015	0.259	0.053	-0.01		0	0.0446	0.212665		0.096	0.0788	0.0889084		0.034	0.0642	0.112653		At1g32870	no apical meristem (NAM) family protein similar to to NAC2 (GI:645671) [Arabidopsis thaliana]; contains Pfam PF02365: No apical meristem (NAM) protein
A001077_01	At1g04870	0.22	0.063	-0.356	0	-0.125	0.101	0.064	-0.099	-0.102	-1.462	0.351	0.375	0.142	0.277	0.264		0	-0.0396	0.216153		-0.099	-0.2996	0.656343		0.277	0.2818	0.091322		At1g04870	protein arginine N-methyltransferase family protein similar to SP|Q96LA8 Protein arginine N-methyltransferase 6 (EC 2.1.1.-) {Homo sapiens}
A001082_01	At1g04985	0	0.134	-0.994	-0.118	0.134	0.067	0.047	0.172	0.291	-0.842	0.132	0.091	0.041	-0.018	0.099		0	-0.1688	0.473129		0.067	-0.053	0.451631		0.091	0.069	0.0585363		At1g04985	expressed protein
A001086_01	At1g60940	0.218	-0.193	-0.421	0.157	0	-0.091	0.173	-0.129	-0.037	0.24	0.24	0.135	-0.21	-0.167	0.38		0	-0.0478	0.262316		-0.037	0.0312	0.16504		0.135	0.0756	0.256728		At1g60940	serine/threonine protein kinase, putative similar to serine/threonine-protein kinase ASK1 from [Arabidopsis thaliana], SWISS-PROT:P43291
A001087_01	At1g13360	0.059	0	-0.961	0.452	-0.231	-0.064	-0.16	0.262	0.174	-0.964	-0.289	-0.341	-0.223	-0.224	-0.486		0	-0.1362	0.522474		-0.064	-0.1504	0.486007		-0.289	-0.3126	0.108753		At1g13360	expressed protein
A001088_01	At1g71696	0.101	0	-0.073	-0.065	0.051	0.021	0.066	-0.134	0.019	0.159	-0.286	-0.239	-0.273	-0.197	-0.173		0	0.0028	0.074694		0.021	0.0262	0.106022		-0.239	-0.2336	0.0483198		At1g71696	carboxypeptidase D, putative similar to carboxypeptidase D [Anas platyrhynchos] gi|2789654|gb|AAB96915
A001089_01	At1g71710	0	0.099	-0.24	0.202	-0.42	-0.056	0.083	0.189	-0.04	-0.398	-0.09	-0.038	-0.019	-0.063	-0.429		0	-0.0718	0.254376		-0.04	-0.0444	0.221299		-0.063	-0.1278	0.170478		At1g71710	inositol polyphosphate 5-phosphatase, putative similar to inositol polyphosphate 5-phosphatase I [Arabidopsis thaliana] GI:10444261
A001090_01	At1g71720	0.028	0	0.002	-0.162	-0.17	-0.166	0.042	-0.201	-0.319	-0.495	-0.265	-0.087	-0.019	-0.055	-0.224		0	-0.0604	0.0970711		-0.201	-0.2278	0.198143		-0.087	-0.13	0.108231		At1g71720	S1 RNA-binding domain-containing protein contains Pfam domain, PF00575: S1 RNA binding domain
A001091_01	At1g64680	0	-0.186	-0.068	0.143	0.12	-0.822	-0.567	-0.491	-0.596	-0.648	-0.851	-0.901	-0.809	-0.911	-0.751		0	0.0018	0.136063		-0.596	-0.6248	0.123995		-0.851	-0.8446	0.066444		At1g64680	expressed protein
A001092_01	At1g64860	0.096	0.162	-0.636	0	-0.275	-0.795	-0.456	-0.495	-1.028	-2.634	-0.709	-0.142	-0.4	-0.315	-1.043		0	-0.1306	0.327986		-0.795	-1.0816	0.89867		-0.4	-0.5218	0.356561		At1g64860	RNA polymerase sigma subunit SigA (sigA) / sigma factor 1 (SIG1) identical to sigma factor SigA [Arabidopsis thaliana] GI:5478439, sigma factor 1 [Arabidopsis thaliana] GI:2353171, plastid RNA polymerase sigma-subunit [Arabidopsis thaliana] GI:2398851; co
A001093_01	At1g79270	0.142	0	-0.165	0.304	-0.21	-0.486	-0.628	-0.68	-0.914	-1.58	-0.216	-0.208	-0.468	-0.241	-0.714		0	0.0142	0.213832		-0.68	-0.8576	0.432258		-0.241	-0.3694	0.220533		At1g79270	expressed protein contains Pfam profile PF04146: YT521-B-like family
A001094_01	At1g33240	0.059	-0.077	-0.467	0	0.079	0.068	0.119	-0.082	-0.063	-0.165	0.056	0.029	0.012	-0.166	0.223		0	-0.0812	0.224038		-0.063	-0.0246	0.115842		0.029	0.0308	0.13844		At1g33240	trihelix DNA-binding protein, putative similar to GTL1 [Arabidopsis thaliana] GI:2664198
A001095_01	At1g62480	0	0.107	-0.285	-0.159	0.125	0.708	0.709	0.024	0.295	-1.252	0.677	0.348	-0.22	0.337	0.055		0	-0.0424	0.176487		0.295	0.0968	0.808115		0.337	0.2394	0.338329		At1g62480	vacuolar calcium-binding protein-related contains weak similarity to vacuolar calcium binding protein [Raphanus sativus] gi|9049359|dbj|BAA99394
A001098_01	At1g35780	0	-0.092	-0.956	0.285	0.124	-0.119	-0.168	-0.134	-0.007	-0.173	0.254	0.186	0.024	0.034	0.455		0	-0.1278	0.484081		-0.134	-0.1202	0.0672287		0.186	0.1906	0.177642		At1g35780	expressed protein
A001100_01	At1g69360	0	-0.015	0.68	0.361	-0.019	0.104	0.118	-0.008	0.152	0.826	-0.062	-0.128	-0.003	0.381	-0.104		0	0.2014	0.312449		0.118	0.2384	0.33392		-0.062	0.0168	0.209047		At1g69360	expressed protein
A001102_01	At1g07210	0.1	0	0.066	-0.155	-0.116	0.164	-0.108	0.058	0.112	-0.231	-0.027	-0.116	0.101	0.186	-0.26		0	-0.021	0.111391		0.058	-0.001	0.164183		-0.027	-0.0232	0.175991		At1g07210	30S ribosomal protein S18 family contains Pfam profile: PF01084 ribosomal protein S18; similar to 30S ribosomal protein S18 (SP:P80382) {Thermus thermophilus}
A001103_01	At1g01060	0	-0.121	-0.001	0.278	0.117	-0.968	-1.148	-1.556	-1.009	-1.212	-0.148	-0.452	-0.5	-0.438	-0.43		0	0.0546	0.15059		-1.148	-1.1786	0.233238		-0.438	-0.3936	0.139953		At1g01060	myb family transcription factor contains Pfam profile: PF00249 myb-like DNA-binding domain; identical to cDNA LATE ELONGATED HYPOCOTYL MYB transcription factor GI:3281845
A001105_01	At1g14330	0.028	-0.089	-0.549	0	0.033	0.328	0.31	0.373	0.435	-0.362	0.233	0.225	0.224	0.315	0		0	-0.1154	0.24729		0.328	0.2168	0.327136		0.225	0.1994	0.117806		At1g14330	kelch repeat-containing F-box family protein contains Pfam profile PF01344: Kelch motif; contains weak Pfam PF00646: F-box domain; weak similarity to Kelch-like protein 1 (Swiss-Prot:Q9NR64) [Homo sapiens]
A001106_01	At1g14345	0	-0.433	-0.701	0.161	0.253	-0.496	-0.529	-0.779	-0.997	-0.682	-0.672	-0.473	-0.88	-0.954	-0.261		0	-0.144	0.407781		-0.682	-0.6966	0.203453		-0.672	-0.648	0.286544		At1g14345	expressed protein contains one transmembrane domain
A001107_01	At1g75820	0	-0.261	-0.14	0.324	0.063	-0.458	-0.667	-0.349	-0.413	-0.663	-0.73	-0.538	-0.82	-0.665	-0.611		0	-0.0028	0.221713		-0.458	-0.51	0.146707		-0.665	-0.6728	0.108387		At1g75820	CLAVATA1 receptor kinase (CLV1) identical to receptor kinase (CLV1) GB:AAB58929 GI:2160756 [Arabidopsis thaliana]
A001113_01	At1g14450	0	-0.016	-0.016	0.11	0.306	0.074	0.133	0.297	0.386	0.876	0.297	0.167	0.33	0.196	0.879		0	0.0768	0.138525		0.297	0.3532	0.317803		0.297	0.3738	0.290441		At1g14450	expressed protein contains similarity to cytochrome c oxidase subunit I GI:5678701 from [Loligo pealei]
A001115_01	At1g32100	0.426	0.009	0	-0.446	-0.484	-0.401	-1.186	-0.644	-0.432	-0.886	-1.618	-1.53	-1.458	-1.269	-1.59		0	-0.099	0.376073		-0.644	-0.7098	0.329649		-1.53	-1.493	0.139467		At1g32100	pinoresinol-lariciresinol reductase, putative similar to pinoresinol-lariciresinol reductase TH1 [Tsuga heterophylla][GI:7578915]; contains isoflavone reductase domain PF02716
A001119_01	At1g56540	0.264	-0.467	0.624	-0.793	0	0.146	-0.046	0.773	1.261	1.225	0.167	-0.324	0.687	-0.133	-0.708		0	-0.0744	0.565317		0.773	0.6718	0.603144		-0.133	-0.0622	0.525462		At1g56540	disease resistance protein (TIR-NBS-LRR class), putative domain signature TIR-NBS-LRR exists, suggestive of a disease resistance protein.
A001121_01	At1g58180	0	0.074	-0.441	-0.295	0.02	-0.444	-0.291	0.02	-0.274	-1.166	-0.134	-0.156	-0.156	-0.089	-0.121		0	-0.1284	0.226357		-0.291	-0.431	0.443859		-0.134	-0.1312	0.027941		At1g58180	carbonic anhydrase family protein / carbonate dehydratase family protein similar to SP|P46512 Carbonic anhydrase 1 (EC 4.2.1.1) (Carbonate dehydratase 1) {Flaveria linearis}; contains Pfam profile PF00484: Carbonic anhydrase
A001123_01	At1g22530		-0.191	-0.228	0.577	0.191	1.365	1.659	1.647	1.417	0.57	1.879	1.474	1.713	1.523	1.577		0	0.08725	0.377458		1.417	1.3316	0.445845		1.577	1.6332	0.163885		At1g22530	SEC14 cytosolic factor family protein / phosphoglyceride transfer family protein contains Pfam PF00650 : CRAL/TRIO domain; contains Pfam PF03765 : CRAL/TRIO, N-terminus; similar to SEC14-like protein 2 (Alpha-tocopherol associated protein) (TAP) (bTAP) (F
A001126_01	At1g43860	0.225	0.105	-0.372	0	-0.215	0.282	0.351	0.388	0.286	-0.69	0.263	0.404	0.321	0.314	0.194		0	-0.0514	0.241376		0.286	0.1234	0.456899		0.314	0.2992	0.077548		At1g43860	expressed protein
A001128_01	At1g05070	0.009	-0.027	0.2	-0.244	0	-0.499	-0.355	-0.288	-0.43	0.09	-0.388	-0.617	-0.278	-0.442	-0.42		0	-0.0124	0.157779		-0.355	-0.2964	0.230057		-0.42	-0.429	0.122552		At1g05070	expressed protein
A001130_01	At1g50740	0.199	0.22	-0.16	-0.2	0	-0.157	-0.019	0.105	0.151	0.031	-0.27	0.013	-0.053	0.143	-0.185		0	0.0118	0.195515		0.031	0.0222	0.119721		-0.053	-0.0704	0.162612		At1g50740	expressed protein contains Pfam profile PF03647: Uncharacterised protein family (UPF0136)
A001131_01	At1g53400	0	0.137	0.563	-0.287	-0.111	0.056	0.084	0.295	0.181	0.196	-0.026	-0.065	0.298	0.407	0.081		0	0.0604	0.321009		0.181	0.1624	0.0955578		0.081	0.139	0.205736		At1g53400	expressed protein
A001132_01	At1g67340	0.049	0.123	-0.797	-0.036	0	-0.649	-0.391	0.079	-0.312	-0.478	-0.453	-0.342	-0.416	-0.165	-0.556		0	-0.1322	0.376381		-0.391	-0.3502	0.270625		-0.416	-0.3864	0.14583		At1g67340	zinc finger (MYND type) family protein / F-box family protein
A001134_01	At1g05120	-0.207	0.005	1.025	0	-0.764	0.094	0.269	0.178	0.26	1.051	0.119	0.139	0.36	0.329	-0.16		0	0.0118	0.647398		0.26	0.3704	0.387008		0.139	0.1574	0.207996		At1g05120	SNF2 domain-containing protein / helicase domain-containing protein / RING finger domain-containing protein similar to SP|P79051 DNA repair protein rhp16 (RAD16 homolog) {Schizosaccharomyces pombe}; contains Pfam profiles PF00271: Helicase conserved C-ter
A001137_01	At1g30690	0	-0.199	-0.334	0.284	0.412	-0.458	-0.415	-0.428	-0.261	-0.811	-0.396	-0.769	-0.556	-0.608	-0.53		0	0.0326	0.314739		-0.428	-0.4746	0.202971		-0.556	-0.5718	0.135186		At1g30690	SEC14 cytosolic factor family protein / phosphoglyceride transfer family protein contains Pfam PF00650 : CRAL/TRIO domain; contains Pfam PF03765 : CRAL/TRIO, N-terminus; similar to cytosolic factor (Phosphatidylinositol/phosphatidylcholine transfer protei
A001138_01	At1g51650	-0.105	0	0.111	-0.242	0.003	0.103	0.04	0.086	0.291	0.294	0.034	-0.046	0.272	0.144	0.267		0	-0.0466	0.133287		0.103	0.1628	0.120626		0.144	0.1342	0.140742		At1g51650	ATP synthase epsilon chain, mitochondrial identical to ATP synthase epsilon chain, mitochondrial SP:Q96253 from [Arabidopsis thaliana]
A001140_01	At1g14910	-0.144	0	-0.069	0.398	0.123	-0.005	-0.078	0.209	0.247	0.392	0.081	-0.133	0.047	0.156	0.301		0	0.0616	0.212166		0.209	0.153	0.191975		0.081	0.0904	0.158536		At1g14910	epsin N-terminal homology (ENTH) domain-containing protein contains Pfam PF01417: ENTH domain. ENTH (Epsin N-terminal homology) domain; similar to Chain A, Calm-N N-Terminal Domain Of Clathrin Assembly Lymphoid Myeloid Leukaemia Protein, Pi(4,5)p2 Complex
A001141_01	At1g06950	0.007	0.069	0	-0.173	-0.841	0.296	0.26	0.015	0.126	-0.91	0.22	0.42	0.418	0.508	0.286		0	-0.1876	0.376182		0.126	-0.0426	0.49758		0.418	0.3704	0.115546		At1g06950	chloroplast inner envelope protein-related similar to chloroplast inner envelope protein GI:1495767 from [Pisum sativum]
A001146_01	At1g48920	0	-0.043	0.123	0.35	-0.243	0.698	0.49	0.163	0.404	0.667	0.937	0.774	0.614	0.609	1.104		0	0.0374	0.218823		0.49	0.4844	0.217233		0.774	0.8076	0.213687		At1g48920	nucleolin, putative similar to nuM1 protein GI:1279562 from [Medicago sativa]
A001147_01	At1g60870	-0.007	0	-0.782	0.357	0.28	0.336	0.337	0.318	0.058	0.361	0.609	0.514	0.269	0.074	0.858		0	-0.0304	0.450777		0.336	0.282	0.126149		0.514	0.4648	0.303679		At1g60870	expressed protein
A001148_01	At1g06770	-0.315	0.124	0.447	0	-0.337	0.138	0.04	0.214	0.159		0.268	0.582	0.376	0.559	0.061		0	-0.0162	0.326599		0.149	0.13775	0.0726194		0.376	0.3692	0.215976		At1g06770	zinc finger (C3HC4-type RING finger) family protein
A001151_01	At1g29700	0.04	-0.079	-0.001	0	0.018	-0.545	-0.573	-0.481	-0.571	-0.974	-0.88	-0.919	-0.806	-0.76	-0.716		0	-0.0044	0.0449144		-0.571	-0.6288	0.196523		-0.806	-0.8162	0.0835775		At1g29700	expressed protein
A001152_01	At1g26460	0	0.144	-0.175	0.255	-0.231	0.312	0.491	0.186	0.35		0.176	0.093	0.222	0.392	-0.114		0	-0.0014	0.205996		0.331	0.33475	0.125553		0.176	0.1538	0.185268		At1g26460	pentatricopeptide (PPR) repeat-containing protein contains Pfam profile PF01535: PPR repeat
A001153_01	At1g80380	-0.019	0.052	0	0.165	-0.087	-0.52	-0.39	-0.33	-0.34	-0.671	-0.404	-0.556	-0.52	-0.569	-0.561		0	0.0222	0.0940675		-0.39	-0.4502	0.144776		-0.556	-0.522	0.0685821		At1g80380	phosphoribulokinase/uridine kinase-related
A001154_01	At1g21780	-0.224	0	-0.437	0.049	0.42	-0.234	-0.102	-0.117	-0.234	-0.506	0.186	0.276	-0.024	0.131	0.483		0	-0.0384	0.321159		-0.234	-0.2386	0.162012		0.186	0.2104	0.187388		At1g21780	BTB/POZ domain-containing protein Contains similarity to gb|AJ000644 SPOP (speckle-type POZ protein) from Homo sapiens and contains a PF|00651 BTB/POZ domain. ESTs gb|T75841, gb|R89974, gb|R30221, gb|N96386, gb|T76457, gb|AI100013 and gb|T76456 come from
A001155_01	At1g69490	0	0.102	0.086	-0.002	-0.036	-0.684	-0.625	-0.736	-0.738	-0.95	-0.385	-0.089	-0.324	-0.197	-0.425		0	0.03	0.0604152		-0.736	-0.7466	0.122743		-0.324	-0.284	0.138993		At1g69490	no apical meristem (NAM) family protein similar to N-term half of NAC domain protein NAM [Arabidopsis thaliana] GI:4325282
A001156_01	At1g06830	1.567	-0.903	0.612	0	-1.034	0.759	0.879	1.2	2.26	2.599	-0.86	-0.743	-0.116	-0.344	-0.131		0	0.0484	1.08431		1.2	1.5394	0.837013		-0.344	-0.4388	0.345642		At1g06830	glutaredoxin family protein contains INTERPRO Domain IPR002109, Glutaredoxin (thioltransferase)
A001157_01	At1g20840	-0.098	0.065	-0.065	0.401		-0.07	-0.128	0.224	0.151	0.257	0.181	0.225	0.166	0.071	0.978		0	0.07575	0.227964		0.151	0.0868	0.175099		0.181	0.3242	0.369777		At1g20840	transporter-related low similarity to D-xylose proton-symporter [Lactobacillus brevis] GI:2895856; contains Pfam profile PF00083: major facilitator superfamily protein
A001159_01	At1g80050	-0.387	0.195	0.404		-0.195	0.683	0.977	-0.896	-0.169	-0.464	-0.131	0.082	-0.461	-0.27	-0.113		0	0.00425	0.360075		-0.169	0.0262	0.784898		-0.131	-0.1786	0.201609		At1g80050	adenine phosphoribosyltransferase 2 (APT2) identical to SP|Q42563 Adenine phosphoribosyltransferase 2 (EC 2.4.2.7) (APRT) {Arabidopsis thaliana}
A001163_01	At1g54410	0.28	0	0.164	-0.161	-0.343	0.884	0.598	0.472	0.654	0.203	0.446	0.166	0.054	-0.03	0.164		0	-0.012	0.249071		0.598	0.5622	0.250212		0.164	0.16	0.179711		At1g54410	dehydrin family protein contains Pfam domain, PF00257: Dehydrin
A001166_01	At1g45130	-0.421	-0.54	0.38	0.053	0	-0.672	-0.391	-0.332	-0.521	-0.392	-0.872	-1.028	-0.896	0.351	-1.104		0	-0.1056	0.374264		-0.392	-0.4616	0.136401		-0.896	-0.7098	0.600608		At1g45130	beta-galactosidase, putative / lactase, putative similar to beta-galactosidase [Lycopersicon esculentum] GI:7939619, beta-galactosidase BG1 GI:15081596 from [Vitis vinifera]; contains Pfam profile PF01301: Glycosyl hydrolases family 35
A001167_01	At1g13310	0	0.03	0.482	-0.166	-0.077	-0.62	-0.198	-0.041	-0.141	0.097	-0.086	-0.211	-0.162	-0.336	-0.257		0	0.0538	0.251116		-0.141	-0.1806	0.269951		-0.211	-0.2104	0.0945584		At1g13310	expressed protein
A001168_01	At1g20160	0.247	0	0.715	-0.058	-0.315	-0.756		-0.581	-0.435	-0.686	-2.112		-0.874	-0.833	-1.131		0	0.1178	0.38905		-0.633	-0.6145	0.139615		-1.002	-1.2375	0.59773		At1g20160	subtilase family protein similar to subtilisin-type protease precursor GI:14150446 from [Glycine max]
A001172_01	At1g02340	0	-0.111	-1.132	0.403	0.43	-0.649	-0.704	-0.59	-0.536	-2.51	-0.841	-0.657	-1.04	-0.591	-1.002		0	-0.082	0.633923		-0.649	-0.9978	0.847686		-0.841	-0.8262	0.200489		At1g02340	long hypocotyl in far-red 1 (HFR1) / reduced phytochrome signaling (REP1) / basic helix-loop-helix FBI1 protein (FBI1) / reduced sensitivity to far-red light (RSF1) / bHLH protein 26 (BHLH026) (BHLH26) identical to SP|Q9FE22 Long hypocotyl in far-red 1 (b
A001181_01	At1g79740	0	-0.114	-0.228	0.218	0.176	-0.277	-0.239	-0.38	-0.316	0.465	-0.217	-0.193	-0.357	-0.361	-0.32		0	0.0104	0.189037		-0.277	-0.1494	0.347394		-0.32	-0.2896	0.0793209		At1g79740	hAT dimerisation domain-containing protein contains Pfam profiles: PF04937 domain of unknown function (DUF659), PF05699 hAT family dimerisation domain
A001182_01	At1g79720	0.138	0	-1.025	-0.322	0.563	-0.307	-0.095	-0.267	-0.761		-0.363	-0.173	-0.366	-0.551	-0.518		0	-0.1292	0.593055		-0.287	-0.3575	0.284288		-0.366	-0.3942	0.150508		At1g79720	aspartyl protease family protein contains Pfam domain, PF00026: eukaryotic aspartyl protease
A001184_01	At1g22700	0.027	-0.155	-0.957	0	0.003	-0.287	-0.159	-0.154	-0.404	-1.152	-0.23	-0.181	-0.111	-0.035	-0.058		0	-0.2164	0.420258		-0.287	-0.4312	0.415938		-0.111	-0.123	0.0820457		At1g22700	tetratricopeptide repeat (TPR)-containing protein contains Pfam profile PF00515 TPR Domain; ESTs gb|T43026, gb|R64902, gb|Z18169 and gb|N37374 come from this gene
A001186_01	At1g30380	0.055	0.236	-0.369	0	-0.145	-0.096	0.01	0.257	0.452	-0.172	-0.093	0.025	0.35	0.335	-0.116		0	-0.0446	0.226915		0.01	0.0902	0.25912		0.025	0.1002	0.227626		At1g30380	photosystem I reaction center subunit psaK, chloroplast, putative / photosystem I subunit X, putative / PSI-K, putative (PSAK) identical to SP|Q9SUI5; strong similarity to SP|P36886 Photosystem I reaction center subunit psaK, chloroplast precursor (Photos
A001187_01	At1g14740	0	0.354	0.086	-0.172	-0.171	0.539	0.462	1.103	0.809	-0.14	0.511	0.703	0.406	0.639	0.215		0	0.0194	0.217747		0.539	0.5546	0.462804		0.511	0.4948	0.194021		At1g14740	expressed protein
A001188_01	At1g22710	0.008	-0.02	-0.457	0.127	0	-0.219	-0.602	-0.207	-0.043	-0.608	-0.846	-0.641	-0.775	-0.744	-0.689		0	-0.0684	0.224749		-0.219	-0.3358	0.255401		-0.744	-0.739	0.0788575		At1g22710	sucrose transporter / sucrose-proton symporter (SUC2) nearly identical to sucrose-proton symporter SUC2 [Arabidopsis thaliana] GI:407092
A001189_01	At1g06410	0.069	0	0.065	-0.063	-0.32	0.133	0.077	0.086	0.218	-0.457	-0.178	-0.482	-0.026	0.037	-0.411		0	-0.0498	0.160433		0.086	0.0114	0.267739		-0.178	-0.212	0.229267		At1g06410	glycosyl transferase family 20 protein / trehalose-phosphatase family protein contains Pfam profile: PF02358 trehalose-phosphatase
A001190_01	At1g53800	0.016	0	0.676	-0.104	-0.554	-0.021	0.111	-0.22	-0.213	0.266	-0.144	-0.264	0.085	0.19	-0.288		0	0.0068	0.440095		-0.021	-0.0154	0.209822		-0.144	-0.0842	0.212869		At1g53800	expressed protein
A001195_01	At1g64980	0.191	0	-0.728	-0.091	0.021	-0.247	-0.297	-0.102	0.311	-1.184	-0.402	-0.642	-0.49	-0.289	-0.796		0	-0.1214	0.354082		-0.247	-0.3038	0.546975		-0.49	-0.5238	0.199482		At1g64980	expressed protein
A001197_01	At1g27320	-0.123	0	0.189	0.067	-0.412	-0.308	-0.271	-0.147	-0.298	-1.997	0.154	0.353	0.089	0.18	-0.28		0	-0.0558	0.228864		-0.298	-0.6042	0.781255		0.154	0.0992	0.233368		At1g27320	histidine kinase (AHK3) identical to histidine kinase AHK3 [Arabidopsis thaliana] gi|13537198|dbj|BAB40775
A001199_01	At1g07010	0	-0.097	0.138	0	-0.338	-0.908	-0.697	-0.706	-0.885	-0.99	-0.981	-0.856	-0.591	-0.615	-1.038		0	-0.0594	0.176816		-0.885	-0.8372	0.129918		-0.856	-0.8162	0.20563		At1g07010	calcineurin-like phosphoesterase family protein contains Pfam profile: PF00149 calcineurin-like phosphoesterase
A001204_01	At1g33350	0	0.337	0.447	-0.144	-0.031	0.634	0.452	0.194	0.387	0.307	0.827	0.618	0.635	0.976	0.858		0	0.1218	0.255391		0.387	0.3948	0.164756		0.827	0.7828	0.153247		At1g33350	pentatricopeptide (PPR) repeat-containing protein contains multiple Pfam domains: PF01535: PPR repeat
A001207_01	At1g20020	0.23	0.223	-0.404	-0.007	0	-0.153	-0.071	0.057	-0.072	-1.325	-0.568	-0.313	-0.283	-0.218	-0.496		0	0.0084	0.257653		-0.072	-0.3128	0.570808		-0.313	-0.3756	0.149035		At1g20020	ferredoxin--NADP(+) reductase, putative / adrenodoxin reductase, putative strong similarity to Ferredoxin--NADP reductase, chloroplast precursor (EC 1.18.1.2) (FNR) from {Pisum sativum} SP|P10933, {Mesembryanthemum crystallinum} SP|P41343, {Spinacia olera
A001209_01	At1g20450	-0.065	0	-0.642	0.183	0.109	0.907	0.923	1.581	1.36	-0.026	1.189	0.305	0.775	0.524	0.474		0	-0.083	0.326846		0.923	0.949	0.616727		0.524	0.6534	0.343499		At1g20450	dehydrin (ERD10) identical to dehydrin ERD10 (Low-temperature-induced protein LTI45) [Arabidopsis thaliana] SWISS-PROT:P42759
A001211_01	At1g80670		-0.124	-0.206	0.306	0.124	0.033	-0.017	0.127	0.139	0.664	0.174	-0.021	0.026	0.062	0.284		0	0.025	0.23404		0.127	0.1892	0.273286		0.062	0.105	0.123256		At1g80670	transducin family protein / WD-40 repeat family protein contains 5 WD-40 repeats (PF00400) (1 weak); similar to Hypothetical RAE1-like protein.(SP:Q38942) [Arabidopsis thaliana]; similar to mRNA-associated protein mrnp 41 ((mRNA export protein) (GB:AAC281
A001212_01	At1g56220	-0.236	0.111	-0.732	0	0.085	-0.066	0.112	0.207	-0.215	-1.201	0.575	0.634	0.139	0.596	0.629		0	-0.1544	0.350667		-0.066	-0.2326	0.565213		0.596	0.5146	0.211361		At1g56220	dormancy/auxin associated family protein similar to Auxin-repressed 12.5 kDa protein (Swiss-Prot:Q05349) [Fragaria ananassa]; similar to auxin-repressed protein (GI:927034) [Fragaria x ananassa]; similar to dormancy-associated protein (GI:2605887) [Pisum
A001215_01	At1g12240	0.165	0	-0.716	0.535	-0.007	-0.34	-0.07	0.082	-0.547	-1.78	-0.065	-0.123	-0.211	0.056	-0.353		0	-0.0046	0.454436		-0.34	-0.531	0.739092		-0.123	-0.1392	0.153897		At1g12240	beta-fructosidase (BFRUCT4) / beta-fructofuranosidase / invertase, vacuolar identical to beta-fructosidase GI:1871503 from [Arabidopsis thaliana]; contains Pfam profile PF00251:Glycosyl hydrolases family 32; identical to cDNA beta-fructosidase (vacuolar f
A001217_01	At1g13440	0.001	0	0.122	-0.097	-0.216	0.299	0.4	0.085	0.179	0.371	0.371	0.329	0.2	0.292	0.318		0	-0.038	0.126224		0.299	0.2668	0.132662		0.318	0.302	0.0637377		At1g13440	glyceraldehyde 3-phosphate dehydrogenase, cytosolic, putative / NAD-dependent glyceraldehyde-3-phosphate dehydrogenase, putative very strong similarity to SP|P25858 Glyceraldehyde 3-phosphate dehydrogenase, cytosolic (EC 1.2.1.12) {Arabidopsis thaliana};
A001218_01	At1g67440	0	0.093	-0.443	-0.096	0.028	-0.178	-0.046	-0.043	-0.547	-0.054	-0.112	0.054	-0.086		-0.063		0	-0.0836	0.212104		-0.054	-0.1736	0.216269		-0.075	-0.05175	0.0732865		At1g67440	expressed protein contains Pfam domain PF03193: Protein of unknown function, DUF258
A001219_01	At1g32160	-0.162	0	0.081	-0.134	0.085	-0.506	-0.474	-0.404	-0.079	-0.048	-0.25	-0.344	-0.179	-0.249	-0.023		0	-0.026	0.11684		-0.404	-0.3022	0.221274		-0.249	-0.209	0.119375		At1g32160	expressed protein
A001222_01	At1g78320	0.168	-0.083	0.625	0	-0.416	0.096	-0.039	-0.002	-0.013	0.771	-0.228	0.127	-0.295	-0.521	-0.361		0	0.0588	0.381283		-0.002	0.1626	0.343932		-0.295	-0.2556	0.239918		At1g78320	glutathione S-transferase, putative similar to glutathione transferase GI:2853219 from [Carica papaya]
A001223_01	At1g78150	0	0.262	-0.519	-0.066	0.022	0.386	0.298	0.131	-0.183	-1.581	0.424	0.575	0.124	0.312	0.163		0	-0.0602	0.284923		0.131	-0.1898	0.807448		0.312	0.3196	0.186393		At1g78150	expressed protein
A001224_01	At1g78270		0.037	-1.04	0.24	-0.037	-0.179	-0.151	0.27	-0.086		0.511	0.565	0.27	0.13	0.525		0	-0.2	0.572112		-0.118	-0.0365	0.208014		0.511	0.4002	0.190375		At1g78270	UDP-glucose glucosyltransferase, putative similar to UDP-glucose glucosyltransferase GI:3928543 from [Arabidopsis thaliana]
A001227_01	At1g78280	-0.167	0	0.531	0.06	-0.406	0.758	0.376	0.359	0.957	0.407	0.952	0.19	0.851	0.272	0.321		0	0.0036	0.345768		0.407	0.5714	0.27103		0.321	0.5172	0.355721		At1g78280	transcription factor jumonji (jmjC) domain-containing protein contains Pfam PF00646: F-box domain; contains Pfam PF02373: jmjC domain; similar to apoptotic cell clearance receptor PtdSerR (GI:11037740) [Mus musculus]
A001229_01	At1g12090	0	-0.355	-0.602	0.383	0.35	-0.602	-0.782	-0.84	-0.798	-1.117	-0.73	-1.084	-1.028	-1.035	-0.31		0	-0.0448	0.432314		-0.798	-0.8278	0.185578		-1.028	-0.8374	0.326294		At1g12090	protease inhibitor/seed storage/lipid transfer protein (LTP) family protein similar to 14 kDa polypeptide [Catharanthus roseus] GI:407410; contains Pfam protease inhibitor/seed storage/LTP family domain PF00234
A001230_01	At1g53280	0	0.159	-0.197	0.162	-0.058	0.315	0.142	-0.03	0.064	-0.168	-0.037	0.292	-0.229	-0.065	-0.088		0	0.0132	0.152337		0.064	0.0646	0.181482		-0.065	-0.0254	0.192235		At1g53280	DJ-1 family protein similar to DJ-1 protein [Homo sapiens] GI:1780755; similar to DJ-1 beta (GI:18642508) [Drosophila melanogaster]; contains Pfam profile: PF01965 ThiJ/PfpI family; TIGRFAM TIGR01383: DJ-1 family protein
A001231_01	At1g63940	0.059	-0.121	0	0.19	-0.868	-0.218	0.291	-0.128	0.144	-0.085	-0.454	0.255	-0.087	0.016	-0.64		0	-0.148	0.41777		-0.085	0.0008	0.210087		-0.087	-0.182	0.361575		At1g63940	monodehydroascorbate reductase, putative similar to monodehydroascorbate reductase GB:AAD28178 [Brassica juncea]
A001233_01	At1g64400	-0.029	-0.148	0.577	0	0.02	-0.613	-0.372	-0.092	-0.171	-0.146	-0.521	-0.711	-0.522	-0.442	-0.516		0	0.084	0.283193		-0.171	-0.2788	0.214783		-0.521	-0.5424	0.100096		At1g64400	long-chain-fatty-acid--CoA ligase, putative / long-chain acyl-CoA synthetase, putative similar to GI:1617270 (MF7P) from [Brassica napus]
A001237_01	At1g67480	0.027	-0.143	0.327	0	-0.159	-0.351	-0.548	-0.525	-0.279	-0.332	-0.73	-0.82	-0.725	-0.663	-0.669		0	0.0104	0.195478		-0.351	-0.407	0.121398		-0.725	-0.7214	0.0631767		At1g67480	kelch repeat-containing F-box family protein similar to SKP1 interacting partner 6 [Arabidopsis thaliana] GI:10716957; contains Pfam profiles PF01344: Kelch motif, PF00646: F-box domain
A001238_01	At1g16270	-0.095	0	0.251	0.182	-0.056	-0.007	-0.155	-0.165	0.212	0.831	0.158	0.032	0.166	0.165	0.266		0	0.0564	0.151971		-0.007	0.1432	0.413604		0.165	0.1574	0.0831432		At1g16270	protein kinase family protein contains PF|00069 Eukaryotic protein kinase domain. ESTs gb|H37741, gb|T43005 and gb|AI100340 come from this gene
A001239_01	At1g28350	0.315	0	0.817	-0.128	-0.222	0.377	0.098	0.04	0.525	0.747		-0.139	0.023	0.233	-0.174		0	0.1564	0.42133		0.377	0.3574	0.295082		-0.058	-0.01425	0.185834		At1g28350	tRNA synthetase class I (W and Y) family protein contains Pfam profile: PF00579 tRNA synthetases class I (W and Y)
A001240_01	At1g28260	-0.167	0	0.55	0.045	-0.09	-0.74	-0.291	-0.044	-0.333	0.089	-0.015	-0.025	0.13	0.132	-0.359		0	0.0676	0.281809		-0.291	-0.2638	0.318227		-0.015	-0.0274	0.200188		At1g28260	expressed protein
A001241_01	At1g64880	0.178	-0.114	0	0.042	-0.635	0.3	0.517	0.128	0.066	0.153	0.127	0.474	0.108	0.231	0.107		0	-0.1058	0.313728		0.153	0.2328	0.180595		0.127	0.2094	0.156554		At1g64880	ribosomal protein S5 family protein contains similarity to 30S ribosomal protein S5 GI:6969105 from [Campylobacter jejuni]
A001243_01	At1g16560	0.069	0	-0.67	-0.036	0.068	0.089	-0.08	0.044	0.055	-1.374	-0.02	0.174	-0.173	-0.176	0.258		0	-0.1138	0.314177		0.044	-0.2532	0.629803		-0.02	0.0126	0.198338		At1g16560	Per1-like family protein contains Pfam profile PF04080: Per1-like
A001246_01	At1g21450	-0.004	0	0.457	0.355	-0.177	-0.131	-0.143	0.007	0.118	-0.288	0.005	0.182	0.019	-0.054	0.088		0	0.1262	0.267669		-0.131	-0.0874	0.155188		0.019	0.048	0.0903466		At1g21450	scarecrow-like transcription factor 1 (SCL1) identical to scarecrow-like 1 GB:AAF21043 GI:6644390 from [Arabidopsis thaliana]
A001247_01	At1g50420		-0.039	0.131	0.039	-0.223	0.064	-0.012	-0.305	-0.134	-0.391	0.209	0.545	0.134	0.084	0.092		0	-0.023	0.150351		-0.134	-0.1556	0.191732		0.134	0.2128	0.1922		At1g50420	scarecrow-like transcription factor 3 (SCL3) identical to GB:AAD24404 GI:4580515 from [Arabidopsis thaliana] (Plant J. 18 (1), 111-119 (1999))
A001248_01	At1g63120	0.334	-0.229	-0.623	0	0.231	-0.109	-0.021	0.161	-0.128	-1.003	-0.241	-0.251	-0.445	-0.571	-0.185		0	-0.0574	0.383736		-0.109	-0.22	0.452393		-0.251	-0.3386	0.162883		At1g63120	rhomboid family protein contains PFAM domain PF01694, Rhomboid family
A001249_01	At1g09660	-0.15	0.027	-0.944	0.097	0	0.11	-0.019	-0.301	-0.33	-1.324	-0.081	-0.246	-0.327	-0.143	0.015		0	-0.194	0.428834		-0.301	-0.3728	0.56348		-0.143	-0.1564	0.134513		At1g09660	KH domain-containing quaking protein, putative similar to GB:AAC67357
A001250_01	At1g03090	-0.315	0.031	0.571	-0.324	0	-0.215	0.046	0.44	-0.132	-0.302	0.668	0.238	0.268	0.585	0.139		0	-0.0074	0.364324		-0.132	-0.0326	0.293792		0.268	0.3796	0.232248		At1g03090	methylcrotonyl-CoA carboxylase alpha chain, mitochondrial / 3-methylcrotonyl-CoA carboxylase 1 (MCCA) nearly identical to SP|Q42523 Methylcrotonyl-CoA carboxylase alpha chain, mitochondrial precursor (EC 6.4.1.4) (3-Methylcrotonyl-CoA carboxylase 1) (MCCa
A001251_01	At1g10830	0.141	0	0.37	-0.109	-0.035	-0.452	-0.563	-0.097	0.031	0.212	-0.654	-0.783	-0.204	-0.428	-0.574		0	0.0734	0.189043		-0.097	-0.1738	0.326173		-0.574	-0.5286	0.222481		At1g10830	sodium symporter-related contains five transmembrane domains; Interpro IPR001991 Sodium:dicarboxylate symporter; EST gb|F13926 comes from this gene
A001252_01	At1g14600	-0.141	-0.143	0.243	0.036	0	-0.757	-0.74	-0.68	-0.471	0.294	-0.852	-0.638		-0.518	-0.423		0	-0.001	0.158643		-0.68	-0.4708	0.442454		-0.578	-0.60775	0.185077		At1g14600	myb family transcription factor contains Pfam profile: PF00249 myb-like DNA-binding domain
A001254_01	At1g18270	-0.179	-0.117	0.422	0	0.072	-0.252	-0.296	0.197	-0.131	0.148	0.038	-0.219	-0.011	0.032	-0.072		0	0.0396	0.235137		-0.131	-0.0668	0.227312		-0.011	-0.0464	0.10603		At1g18270	ketose-bisphosphate aldolase class-II family protein low similarity to KbaY (tagatose-1,6-bisphosphate aldolase) [Escherichia coli] GI:8895753; contains Pfam profile PF01116: Fructose-bisphosphate aldolase class-II
A001257_01	At1g15060	0	-0.072	-0.093	0.217	0.236	-0.544	-0.509	-0.383	-0.523	0.124	-0.683	-0.658	-0.481	-0.521	-0.224		0	0.0576	0.158137		-0.509	-0.367	0.281587		-0.521	-0.5134	0.183394		At1g15060	expressed protein
A001258_01	At1g15000	-0.059	0	-0.412	0.113	0.205	-0.096	-0.136	0.177	-0.395	0.354	-0.11	-0.289	-0.507	-0.468	0.194		0	-0.0306	0.236293		-0.096	-0.0192	0.29092		-0.289	-0.236	0.287598		At1g15000	serine carboxypeptidase S10 family protein similar to Serine carboxypeptidase precursor (SP:P32826) [Arabidopsis thaliana]; similar to GB:AAD42963 from [Matricaria chamomilla]
A001259_01	At1g03310	0.04	-0.09	-0.04	0.128		-0.55	-0.652	-0.467	-0.61		-1.103	-0.868	-0.451	-0.951	-0.65		0	0.0095	0.0954341		-0.58	-0.56975	0.0802761		-0.868	-0.8046	0.256627		At1g03310	isoamylase, putative / starch debranching enzyme, putative similar to isoamylase isoform 2 [Solanum tuberosum] GI:27728147, isoamylase from [Triticum aestivum] GI:17932898, [Hordeum vulgare] GI:21314275, [Oryza sativa] GI:3252794; contains Pfam profiles P
A001261_01	At1g36370	0.098	-0.112	0	0.553	-0.023	0.194	0.207	0.198	0.354	0.454	0.523	0.272	0.376	0.159	0.129		0	0.1032	0.262314		0.207	0.2814	0.117464		0.272	0.2918	0.162076		At1g36370	glycine hydroxymethyltransferase, putative / serine hydroxymethyltransferase, putative / serine/threonine aldolase, putative similar to serine hydroxymethyltransferase [Chlamydomonas reinhardtii] GI:17066746; contains Pfam profile PF00464: serine hydroxym
A001264_01	At1g14990	-0.023	0.191	0.165	-0.105	0	-0.168	-0.042	0.382	0.219	0.908	0.225	0.058	0.308	0.294	0.69		0	0.0456	0.127341		0.219	0.2598	0.421562		0.294	0.315	0.231983		At1g14990	expressed protein
A001271_01	At1g61000		-0.706	0.087	-0.087	0.595	-0.806		-0.461	-0.335	0.371	-0.657	-0.645	-0.379	-0.633	-0.086		0	-0.02775	0.536817		-0.398	-0.30775	0.494362		-0.633	-0.48	0.248697		At1g61000	Nuf2 family protein contains Pfam PF03800: Nuf2 family domain; similar to Myosin-like protein NUF2 (Nuclear filament-containing protein 2) (Nuclear division protein nuf2) (Swiss-Prot:Q10173) [Schizosaccharomyces pombe]
A001272_01	At1g15180	-0.291	0.063	0.04	-0.351	0	-0.564	-0.635	-0.745	-1.122	-0.155	-0.776	-0.78	-0.743	-0.597	-0.827		0	-0.1078	0.19707		-0.635	-0.6442	0.347954		-0.776	-0.7446	0.0877741		At1g15180	MATE efflux family protein contains Pfam profile PF01554: Uncharacterized membrane protein family
A001273_01	At1g62960	-0.284	-0.269	0.015	0.101	0	-0.809	-0.779	-0.837	-0.524	-0.396	-0.452	-0.566	-0.458	-0.399	-0.266		0	-0.0874	0.176953		-0.779	-0.669	0.197153		-0.452	-0.4282	0.109093		At1g62960	1-aminocyclopropane-1-carboxylate synthase, putative / ACC synthase, putative similar to GI:1173638 [GB:U35779] from [Triticum aestivum] (Plant Mol. Biol. 31 (5), 1009-1020 (1996)), GI:1813331 from Vigna radiata
A001276_01	At1g48110	0.029	0	-0.041	0.364	-0.127	-0.02	-0.107	0.003	0.154	-0.705	0.143	-0.06	-0.134	0.036	0.124		0	0.045	0.187764		-0.02	-0.135	0.332218		0.036	0.0218	0.118639		At1g48110	expressed protein contains Pfam profile PF04146: YT521-B-like family
A001278_01	At1g14560	0.224	0.413	-0.28	-0.032	0	0.047	0.197	0.259	0.404	-0.854	0.187	0.272	0.507	0.637	-0.145		0	0.065	0.264123		0.197	0.0106	0.500017		0.272	0.2916	0.303168		At1g14560	mitochondrial substrate carrier family protein contains Pfam profile: PF00153 mitochondrial carrier protein
A001281_01	At1g01940	-0.121	0.065	0.168	0	-0.21	0.531	0.191	0.328	0.271	0.099	0.641	0.674	0.31	0.37	0.461		0	-0.0196	0.14939		0.271	0.284	0.162779		0.461	0.4912	0.16147		At1g01940	peptidyl-prolyl cis-trans isomerase cyclophilin-type family protein contains Pfam domain, PF00160: peptidyl-prolyl cis-trans isomerase, cyclophilin-type
A001283_01	At1g57760	0.005	-0.091	0	-0.208	0.216	-0.009	-0.098	-0.119	-0.21	-0.075	-0.153	-0.138	-0.262	-0.232	-0.051		0	-0.0156	0.155731		-0.098	-0.1022	0.0730527		-0.153	-0.1672	0.0832809		At1g57760	expressed protein
A001284_01	At1g79040	0	0.622	0.41	-0.351	-0.419	0.118	0.177	0.45	0.786	0.118	0.155	-0.009	0.699	0.827	0.178		0	0.0524	0.458262		0.177	0.3298	0.289669		0.178	0.37	0.368721		At1g79040	photosystem II 10 kDa polypeptide identical to photosystem II 10 kDa polypeptide, chloroplast [precursor] SP:P27202 from [Arabidopsis thaliana]; contains Pfam profile: PF04725 photosystem II 10 kDa polypeptide PsbR
A001285_01	At1g50020	0.14	-0.04	-0.387	0	0.189	-0.657	-0.761	-0.521	-0.413	-0.844	-0.513	-0.575	-0.444	-0.554	-0.658		0	-0.0196	0.226257		-0.657	-0.6392	0.174809		-0.554	-0.5488	0.0789031		At1g50020	expressed protein
A001286_01	At1g31780	0	-0.392	-0.498	0.065	0.094	0.003	-0.11	-0.06	0.001	0.113	0.106	-0.065	-0.17	-0.175	0.543		0	-0.1462	0.277424		0.001	-0.0106	0.0835422		-0.065	0.0478	0.299337		At1g31780	conserved oligomeric Golgi complex component-related / COG complex component-related similar to Conserved oligomeric Golgi complex component 6 (Swiss-Prot:Q9Y2V7) [Homo sapiens];
A001287_01	At1g65030	0.069	0	-0.353	0.275	-0.652	0.33	0.309	0.136	-0.053		0.285	0.389	-0.054	-0.121	0.205		0	-0.1322	0.368346		0.222	0.1805	0.178293		0.205	0.1408	0.219662		At1g65030	transducin family protein / WD-40 repeat family protein contains 5 WD-40 repeats (PF00400); similar to PAK/PLC-interacting protein 1 (GI:14211689) [Homo sapiens]
A001288_01	At1g69780	0.062	-0.062	0.41		-0.068	0.198	0.264	0.109	-0.01	0.45	0.522	-0.135	0.039	0.319	0.608		0	0.0855	0.224478		0.198	0.2022	0.172451		0.319	0.2706	0.315251		At1g69780	homeobox-leucine zipper protein 13 (HB-13) / HD-ZIP transcription factor 13 identical to homeobox gene 13 protein (GP:12325190) [Arabidopsis thaliana]
A001289_01	At1g35680		0.207	-0.764	0.137	-0.137	-0.307		-0.101	-0.2	-3.255	0.037	0.075	0.232	0.361	-0.507		0	-0.13925	0.442162		-0.254	-0.96575	1.52848		0.075	0.0396	0.331793		At1g35680	50S ribosomal protein L21, chloroplast / CL21 (RPL21) identical to 50S ribosomal protein L21, chloroplast precursor (CL21) [Arabidopsis thaliana] SWISS-PROT:P51412
A001296_01	At1g48840	-0.106	0.053	0.764	0	-0.181	-0.388	-0.318	-0.023	-0.068	0.149	-0.192	-0.219	0.109	0.28	-0.362		0	0.106	0.37892		-0.068	-0.1296	0.220817		-0.192	-0.0768	0.262992		At1g48840	expressed protein contains Pfam profile: PF04842 plant protein of unknown function (DUF639)
A001297_01	At1g44920	0.085	0	-0.48	-0.161	0.08	-0.715	-0.561	-0.45	-0.653	-0.633	-0.644	-0.517	-0.505	-0.692	-0.465		0	-0.0952	0.236976		-0.633	-0.6024	0.101384		-0.517	-0.5646	0.0978177		At1g44920	expressed protein
A001299_01	At1g07590	0.111	0	0.097	-0.318	-0.659	0.171	0.227	0.204	0.819	0.328	0.122	0.086	0.604	0.64	0.245		0	-0.1538	0.331234		0.227	0.3498	0.268761		0.245	0.3394	0.264934		At1g07590	pentatricopeptide (PPR) repeat-containing protein low similarity to DNA-binding protein [Triticum aestivum] GI:6958202; contains Pfam profile PF01535: PPR repeat
A001300_01	At1g01630	0.359	-0.204	-0.489	0	0.25	-0.094	-0.095	-0.222	-0.159	-1.46	-0.196	-0.294	-0.555	-0.514	-0.296		0	-0.0168	0.34304		-0.159	-0.406	0.591575		-0.296	-0.371	0.155309		At1g01630	SEC14 cytosolic factor, putative / phosphoglyceride transfer protein, putative contains Pfam PF00650 : CRAL/TRIO domain and PF03765 : CRAL/TRIO, N-terminus; similar to polyphosphoinositide binding protein Ssh2p GB:AAB94599 GI:2739046 from [Glycine max]
A001302_01	At1g69700	0	0.17	1.091	-0.433	-0.293	0.892	0.678	-0.29	-0.125	-0.437	0.251	0.242	0.071	0.125	0.009		0	0.107	0.599015		-0.125	0.1436	0.600612		0.125	0.1396	0.105914		At1g69700	ABA-responsive protein (HVA22c) identical to AtHVA22c [Arabidopsis thaliana] GI:4884936
A001303_01	At1g15670	-0.091	0	-0.57	0.135	0.26	0.157	0.046	0.468	1.055	0.323	0.591	0.619	0.45	0.707	0.823		0	-0.0532	0.318141		0.323	0.4098	0.394798		0.619	0.638	0.138654		At1g15670	kelch repeat-containing F-box family protein similar to SP|Q9ER30 Kelch-related protein 1 (Sarcosin) {Rattus norvegicus}; contains Pfam profiles PF01344: Kelch motif, PF00646: F-box domain
A001304_01	At1g01680	0.558	0	0.165	-0.77	-0.837	1.424	0.557	1.443	2.081	1.224	1.06	1.546	1.222	1.137	0.875		0	-0.1768	0.607406		1.424	1.3458	0.546151		1.137	1.168	0.24712		At1g01680	U-box domain-containing protein
A001306_01	At1g01710	0.052	-0.158	0.372	-0.018	0	-0.478	-0.288	-0.269	-0.025	0.004	-0.276	-0.522	-0.402	-0.156	-0.338		0	0.0496	0.196262		-0.269	-0.2112	0.200875		-0.338	-0.3388	0.136855		At1g01710	acyl-CoA thioesterase family protein contains Pfam profiles: PF02551 acyl-CoA thioesterase, PF00027 cyclic nucleotide-binding domain
A001308_01	At1g01725	-0.224	0.057	0.552	0	-0.185	0.283	0.392	0.337	0.067	0.446	0.601	0.731	0.818	0.513	0.517		0	0.04	0.309981		0.337	0.305	0.146289		0.601	0.636	0.134781		At1g01725	expressed protein
A001309_01	At1g75210	-0.034	-0.156	0.167	0	0.246	-0.24	-0.49	-0.569	-0.221	0.142	-0.299	-0.343	-0.531	-0.531	-0.035		0	0.0446	0.161207		-0.24	-0.2756	0.278698		-0.343	-0.3478	0.204556		At1g75210	5' nucleotidase family protein contains Pfam profile: PF05761 5' nucleotidase family
A001311_01	At1g75350	0.117	0.014	-0.284	-0.13	0	-0.132	0.043	-0.03	-0.181	-0.992	-0.159	0.033	-0.04	-0.092	-0.113		0	-0.0566	0.154453		-0.132	-0.2584	0.419269		-0.092	-0.0742	0.0736118		At1g75350	ribosomal protein L31 family protein similar to SP:O46917 from [Guillardia theta]
A001313_01	At1g80130	-0.015	0.135	-0.543	0.58	0	-0.127	-0.391	-0.26	-0.714	-1.149	0.56	0.461	-0.186	0.307	0.292		0	0.0314	0.401488		-0.391	-0.5282	0.409765		0.307	0.2868	0.286775		At1g80130	expressed protein
A001316_01	At1g76550	0	-0.118	0.548	0.256	-0.043	0.285	0.236	-0.164	0.164	0.865	-0.266	-0.542	-0.393	-0.243	0.044		0	0.1286	0.273369		0.236	0.2772	0.372404		-0.266	-0.28	0.216768		At1g76550	pyrophosphate--fructose-6-phosphate 1-phosphotransferase alpha subunit, putative / pyrophosphate-dependent 6-phosphofructose-1-kinase, putative strong similarity to SP|Q41140 Pyrophosphate--fructose 6-phosphate 1-phosphotransferase alpha subunit (EC 2.7.1
A001317_01	At1g01930	0	-0.011	0.743	0.184	-0.222	-0.057	-0.057	0.032	0.005	0.646	-0.175	-0.137	0.032		-0.008		0	0.1388	0.367077		0.005	0.1138	0.300046		-0.072	-0.072	0.0995758		At1g01930	zinc finger protein-related contains Pfam PF00023: Ankyrin repeat; contains Pfam PF00096: Zinc finger, C2H2 type domain and Prosite PS00028: Zinc finger, C2H2 type, domain
A001318_01	At1g09310	0	-0.528	-0.49	0.108	0.131	-0.643	-0.638	-0.502	-0.696	-0.688	-0.594	-1.094	-1.12	-1.059	-0.485		0	-0.1558	0.326474		-0.643	-0.6334	0.0779089		-1.059	-0.8704	0.305286		At1g09310	expressed protein contains Pfam profile PF04398: Protein of unknown function, DUF538
A001319_01	At1g72010	-0.038	0	-1.613	0.02	0.23	-0.359	-0.262	-0.125	-0.283	-0.802	-0.116	-0.157	-0.312	0.035	0.026		0	-0.2802	0.752322		-0.283	-0.3662	0.257842		-0.116	-0.1048	0.143557		At1g72010	TCP family transcription factor, putative PCF2 (GP:2580440) [Oryza sativa]
A001323_01	At1g53620		-0.158	-0.117	0.313	0.117	-0.402	-0.365	-0.217	-0.473	0.476	-0.087	-0.035	-0.122	0.054	-0.072		0	0.03875	0.219321		-0.365	-0.1962	0.387218		-0.072	-0.0524	0.0671737		At1g53620	glycine-rich protein
A001325_01	At1g53590	-0.045	0	1.012	0.283	-0.291	0.048	0.109	0.346	0.334	0.768	0.059	-0.111	0.19	0.292	-0.093		0	0.1918	0.501748		0.334	0.321	0.282876		0.059	0.0674	0.175429		At1g53590	C2 domain-containing protein
A001326_01	At1g65070	-0.033	0	-0.808	0.12	0.101	-0.313	-0.387	-0.5	-0.696	-0.618	-0.457	-0.387	-0.135	-0.308	-0.358		0	-0.124	0.387838		-0.5	-0.5028	0.158145		-0.358	-0.329	0.121105		At1g65070	DNA mismatch repair MutS family protein contains Pfam profile PF00488: MutS domain V
A001328_01	At1g78100	0	-0.121	-0.981	0.385	0.298	-0.234	-0.052	-0.146	-0.333	-0.426	-0.491	-0.309	-0.655	-0.66	-0.315		0	-0.0838	0.54289		-0.234	-0.2382	0.147855		-0.491	-0.486	0.172795		At1g78100	F-box family protein contains F-box domain Pfam:PF00646
A001329_01	At1g31330	-0.1	0.388	-0.105	0.182	0	-0.067	-0.046	0.381	0.403	0.222	-0.093	-0.029	0.538	0.503	0.048		0	0.073	0.210979		0.222	0.1786	0.225815		0.048	0.1934	0.302997		At1g31330	photosystem I reaction center subunit III family protein contains Pfam profile: PF02507: photosystem I reaction center subunit III
A001332_01	At1g12770	0.027	0	-0.144	-0.04	0.029	0.126	0.201	0.024	-0.13	0.289	0.122	0.121	0.096	0.041	0.585		0	-0.0256	0.0718143		0.126	0.102	0.162214		0.121	0.193	0.221586		At1g12770	DEAD/DEAH box helicase family protein / pentatricopeptide (PPR) repeat-containing protein contains Pfam profiles: PF00271 helicase conserved C-terminal domain, PF01535 PPR repeat, PF00270: DEAD/DEAH box helicase
A001333_01	At1g69510	0	-0.028	0.149	0.013	-0.028	-0.008	-0.138	-0.035	0.02	-0.295	-0.243	-0.096	-0.222	-0.155	0.027		0	0.0212	0.073639		-0.035	-0.0912	0.128618		-0.155	-0.1378	0.10881		At1g69510	expressed protein
A001334_01	At1g12820	0	0.107	-0.461	0.138	-0.053	-0.087	-0.049	-0.148	-0.566	-1.148	-0.123	0.242	-0.314	-0.036	0.027		0	-0.0538	0.240495		-0.148	-0.3996	0.466833		-0.036	-0.0408	0.20371		At1g12820	transport inhibitor response protein, putative E3 ubiquitin ligase SCF complex F-box subunit; similar to transport inhibitor response 1 GI:2352492 from [Arabidopsis thaliana]
A001335_01	At1g32770		0.506	-0.57	0.273	-0.273	-0.342	0.12	0.192	0.324		0.031	0.571	0.467	0.962	0.236		0	-0.016	0.49294		0.156	0.0735	0.289595		0.467	0.4534	0.352978		At1g32770	no apical meristem (NAM) family protein similar to OsNAC7 protein GB:BAA89801 GI:6730944 from [Oryza sativa]
A001339_01	At1g02860	0.048	-0.098	-0.631	0	0.437	-0.692	-0.421	-0.253	-0.265	-1.151	-0.043	-0.255	-0.458	-0.39	-0.334		0	-0.0488	0.383774		-0.421	-0.5564	0.376575		-0.334	-0.296	0.159855		At1g02860	SPX (SYG1/Pho81/XPR1) domain-containing protein / zinc finger (C3HC4-type RING finger) protein-related weak similarity to tripartite motif protein TRIM13 [Mus musculus] GI:12407427, gpStaf50 [Homo sapiens] GI:899300; contains Pfam profiles PF03105: SPX do
A001345_01	At1g67280	0.018	0.003	-0.633	0	-0.007	-0.237	-0.113	0.104	-0.192	-1.401	-0.167	-0.03	-0.051	-0.076	-0.362		0	-0.1238	0.284798		-0.192	-0.3678	0.592249		-0.076	-0.1372	0.136098		At1g67280	lactoylglutathione lyase, putative / glyoxalase I, putative similar to putative lactoylglutathione lyase SP:Q39366, GI:2494843 from [Brassica oleracea]
A001347_01	At1g08620	-0.029	0	0.694	0.41	-0.356	0.073	0.107	0.029	0.35	0.676	0.275	0.345	0.423	0.296	0.39		0	0.1438	0.410463		0.107	0.247	0.270208		0.345	0.3458	0.0620621		At1g08620	transcription factor jumonji (jmj) family protein / zinc finger (C5HC2 type) family protein contains Pfam domains, PF02375: jmjN domain, PF02373: jmjC domain and PF02928: C5HC2 zinc finger
A001349_01	At1g32060	0	-0.045	-0.118	0.23	0.152	-0.54	-0.589	-0.395	-0.522	-1.288	-0.756	-0.688	-0.682	-0.754	-0.579		0	0.0438	0.143493		-0.54	-0.6668	0.354564		-0.688	-0.6918	0.072154		At1g32060	phosphoribulokinase (PRK) / phosphopentokinase nearly identical to SP|P25697 Phosphoribulokinase, chloroplast precursor (EC 2.7.1.19) (Phosphopentokinase) (PRKASE) (PRK) {Arabidopsis thaliana}
A001350_01	At1g19180	0	-0.369	0.11	-0.098	0.018	0.843	0.085	0.714	1.644	1.57	0.67	-0.434	0.95	-0.203	-0.024		0	-0.0678	0.183851		0.843	0.9712	0.647912		-0.024	0.1918	0.591102		At1g19180	expressed protein
A001351_01	At4g00585	0.242	0.285	0	-0.16	-0.02	0.213	0.355	0.402	0.469	0.134	0.244	0.153	0.442	0.472	0.301		0	0.0694	0.18822		0.355	0.3146	0.137885		0.301	0.3224	0.13415		At4g00585	expressed protein
A001352_01	At1g74710	0.574	0	0.939	-0.356	-0.407	0.962	0.103	1.363	2.283	1.605	-0.062	0.451	0.779	0.686	-0.836		0	0.15	0.589721		1.363	1.2632	0.806778		0.451	0.2036	0.666392		At1g74710	isochorismate synthase 1 (ICS1) / isochorismate mutase identical to GI:17223087 and GB:AF078080; contains Pfam profile PF00425: chorismate binding enzyme; contains TIGRfam profile TIGR00543: isochorismate synthases; identical to cDNA isochorismate synthas
A001353_01	At1g71900	0	-0.011	0.582	0.06	-0.066	-0.061	0.028	-0.022	0.011	0.464	0.045	-0.062	0.189	0.146	0.058		0	0.113	0.265968		0.011	0.084	0.215131		0.058	0.0752	0.0974613		At1g71900	expressed protein
A001356_01	At1g43700	-0.102	0.12	-0.062	0	0.13	0.121	0.255	0.17	-0.137	0.186	0.294	0.57	0.208	0.264	0.486		0	0.0172	0.104963		0.17	0.119	0.150935		0.294	0.3644	0.155367		At1g43700	VirE2-interacting protein (VIP1) identical to VirE2-interacting protein VIP1 GB:AAF37279 GI:7258340 from [Arabidopsis thaliana]
A001358_01	At1g64650	0.216	-0.028	-0.35	0.206	0	-0.023	0.191	-0.101	-0.293	-1.272	-0.191	-0.038	-0.277	-0.294	-0.132		0	0.0088	0.230211		-0.101	-0.2996	0.570579		-0.191	-0.1864	0.105817		At1g64650	expressed protein
A001360_01	At1g59840	0.017	-0.056	0.592	-0.307	0	-0.47	-0.379	-0.384	-0.79	-0.767	-0.715	-0.589	-0.297	-0.453	-0.646		0	0.0492	0.330165		-0.47	-0.558	0.204674		-0.589	-0.54	0.166493		At1g59840	expressed protein
A001363_01	At1g23820	-0.174	0.28	0.489	0	-0.15	0.561	0.421	-0.106	0.386	0.183	0.66	0.54	0.484	0.527	0.862		0	0.089	0.287529		0.386	0.289	0.258881		0.54	0.6146	0.152941		At1g23820	spermidine synthase 1 (SPDSYN1) / putrescine aminopropyltransferase 1 identical to SP|Q9ZUB3 Spermidine synthase 1 (EC 2.5.1.16) (Putrescine aminopropyltransferase 1) (SPDSY 1) {Arabidopsis thaliana}
A001364_01	At1g48850	0.371	0	-0.511	0.017	-0.122	0.176	0.051	0.21	0.339	-1.262	-0.122	0.165	-0.088	0.074	-0.28		0	-0.049	0.31699		0.176	-0.0972	0.659167		-0.088	-0.0502	0.174018		At1g48850	chorismate synthase, putative / 5-enolpyruvylshikimate-3-phosphate phospholyase, putative similar to chorismate synthase from Lycopersicon esculentum [SP|Q42884], Corydalis sempervirens [SP|P27793]; contains Pfam chorismate synthase domain PF01264
A001367_01	At1g49730	0.018	-0.594	0	-0.322	0.058	-0.472	-0.551	-0.281	-0.509	0.103	-1.144	-1.509		-1.305	-0.856		0	-0.168	0.282439		-0.472	-0.342	0.269358		-1.225	-1.2035	0.275638		At1g49730	protein kinase family protein contains Pfam PF00069: Protein kinase domain; similar to AtPK2324 (GI:1785621) [Arabidopsis thaliana]; similar to receptor-like protein kinase (GI:1644291) [Catharanthus roseus]; similar to somatic embryogenesis receptor-like
A001369_01	At1g10522	0.177	0	0.202	-0.351	-0.041	0.145	0.345	-0.157	0.119	0.008	-0.003	-0.289	-0.16	-0.047	0.131		0	-0.0026	0.221913		0.119	0.092	0.1848		-0.047	-0.0736	0.159229		At1g10522	expressed protein
A001370_01	At1g27020	-0.909	-0.213	0.213	0.631		0.603	1.033	1.372	2.39	2.682	2.611	1.992	2.215	1.852	1.594		0	-0.0695	0.657231		1.372	1.616	0.888964		1.992	2.0528	0.384841		At1g27020	expressed protein
A001372_01	At1g64710	0	-0.306	-0.45	0.195	0.309	0.102	0.305	0.662	0.963	1.3	0.349	0.42	0.302	0.242	0.933		0	-0.0504	0.322855		0.662	0.6664	0.484406		0.349	0.4492	0.278188		At1g64710	alcohol dehydrogenase, putative similar to alcohol dehydrogenase GI:551257 from [Nicotiana tabacum]
A001375_01	At1g02790	-0.022	0	0.47	-0.138	0.063	2.575	2.106	-0.185	1.988	0.128	1.172	-0.285	-0.108	-0.112	1.399		0	0.0746	0.232686		1.988	1.3224	1.25747		-0.108	0.4132	0.803515		At1g02790	exopolygalacturonase / galacturan 1,4-alpha-galacturonidase (PGA3) / pectinase identical to SP|P49062 Exopolygalacturonase clone GBGE184 precursor (EC 3.2.1.67) (ExoPG) (Galacturan 1,4-alpha-galacturonidase) {Arabidopsis thaliana}
A001376_01	At1g10580	0.014	0	-0.726	0.177	-0.62	0.267	0.137	0.243	0.017	-1.078	0.215	0.47	-0.001	0.227	-0.059		0	-0.231	0.411156		0.137	-0.0828	0.565067		0.215	0.1704	0.21033		At1g10580	transducin family protein / WD-40 repeat family protein similar to splicing factor hPRP17 (gi|3283220); contains 7 WD-40 repeats (PF00400);similar to ESTs emb|F15435 and dbj|AUO62661
A001378_01	At1g32460	-0.031	0.002	-0.145	0	0.354	0.271	0.255	0.617	0.857	0.587	0.473	0.256	0.488	0.335	0.78		0	0.036	0.187634		0.587	0.5174	0.254784		0.473	0.4664	0.200243		At1g32460	expressed protein
A001380_01	At1g31850	0	-0.018	0.744	0.185	-0.597	0.732	0.693	0.069	0.345	0.501	-0.273	0.047	0.019	0.625	-0.388		0	0.0628	0.480826		0.501	0.468	0.27191		0.019	0.006	0.393093		At1g31850	dehydration-responsive protein, putative strong similarity to early-responsive to dehydration stress ERD3 protein [Arabidopsis thaliana] GI:15320410; contains Pfam profile PF03141: Putative methyltransferase
A001383_01	At1g16970	0.069	0	0.473	-0.075	-0.297	-0.096	-0.061	0.047	0.293	0.546	-0.17	-0.08	0.013	0.201	-0.295		0	0.034	0.281311		0.047	0.1458	0.270566		-0.08	-0.0662	0.187738		At1g16970	Ku70-like protein identical to Ku70-like protein GI:12006424 from [Arabidopsis thaliana]; contains Pfam profiles PF03731: Ku70/Ku80 N-terminal alpha/beta domain, PF02735: Ku70/Ku80 beta-barrel domain, PF03730: Ku70/Ku80 C-terminal arm, and PF02037: SAP do
A001384_01	At1g66880	0.274	0	-0.278	-0.333	0.003	1.255	0.77	1.284	1.871	1.58	0.726	1.317	0.869	0.842	0.972		0	-0.0668	0.245432		1.284	1.352	0.410519		0.869	0.9452	0.225532		At1g66880	serine/threonine protein kinase family protein contains protein kinase domain, Pfam:PF00069; contains serine/threonine protein kinase domain, INTERPRO:IPR002290
A001386_01	At1g62810	-0.288	-0.524	0.462	0.065	0	-0.087	-0.043	0.227	-0.213	1.334	-0.227	-0.313	0.186	0.194	-0.087		0	-0.057	0.373813		-0.043	0.2436	0.630311		-0.087	-0.0494	0.232968		At1g62810	copper amine oxidase, putative similar to copper amine oxidase [Cicer arietinum] gi|3819099|emb|CAA08855
A001387_01	At1g01300	0	0.202	-0.766	0.563	-0.068	0.982	0.804	0.551	0.393	-0.702	0.558	0.379	0.222	0.359	0.381		0	-0.0138	0.486878		0.551	0.4056	0.659363		0.379	0.3798	0.119468		At1g01300	aspartyl protease family protein contains Pfam domain, PF00026: eukaryotic aspartyl protease
A001388_01	At1g25290	0	0.05	-0.525	-0.191	0.046	-0.251	-0.046	0.064	-0.31	-1.018	-0.081	-0.109	-0.256	-0.223	0.091		0	-0.124	0.244868		-0.251	-0.3122	0.422579		-0.109	-0.1156	0.137087		At1g25290	rhomboid family protein contains PFAM domain PF01694, Rhomboid family
A001389_01	At1g29850	0.098	-0.054	0.02	-0.126	0	0.469	0.423	0.263	0.409	0.373	0.527	0.542	0.277	0.177	0.446		0	-0.0124	0.0837066		0.409	0.3874	0.0775809		0.446	0.3938	0.160526		At1g29850	double-stranded DNA-binding family protein contains Pfam profile: PF01984 double-stranded DNA-binding domain
A001390_01	At1g45976	-0.016	0.4	0.236	-0.064	0	0.288	0.276	-0.025	0.062	-0.363	0.623	0.597	0.423	0.441	0.194		0	0.1112	0.198885		0.062	0.0476	0.266472		0.441	0.4556	0.171557		At1g45976	expressed protein
A001392_01	At1g19660	0.114	0	0.242	-0.279	-0.312	0.297	0.162	0.187	0.176	0.035	-0.18	0.094	-0.178	-0.083	-0.639		0	-0.047	0.242745		0.176	0.1714	0.0931842		-0.178	-0.1972	0.270966		At1g19660	wound-responsive family protein similar to wound inducive gene (GI:8096273)[Nicotiana tabacum]
A001393_01	At1g10760	-0.058	0	0.558	0.399	-0.145	0.024	0.083	0.178	0.213	0.819	-0.151	-0.183	0.123	0	0.042		0	0.1508	0.308728		0.178	0.2634	0.319524		0	-0.0338	0.129876		At1g10760	starch excess protein (SEX1) identical to SEX1 [Arabidopsis thaliana] GI:12044358; supporting cDNA gi|12044357|gb|AF312027.1|AF312027
A001395_01	At1g21910	0	-0.199	-0.296	0.187	0.339	1.047	1.026	1.644	0.932	2.361	1.31	0.291	1.006	0.215	0.902		0	0.0062	0.263113		1.047	1.402	0.605505		0.902	0.7448	0.474081		At1g21910	AP2 domain-containing transcription factor family protein similar to TINY GB:CAA64359 GI:1246403 from [Arabidopsis thaliana]
A001398_01	At1g12460	-0.038	-0.199	0.03	0	0.327	-0.694	-0.564	-0.255	-0.385		-0.509	-0.617	-0.47		-0.565		0	0.024	0.191046		-0.475	-0.4745	0.193547		-0.537	-0.54025	0.0643292		At1g12460	leucine-rich repeat transmembrane protein kinase, putative
A001400_01	At1g21900	0.174	0	-0.167	-0.127	0.043	0.444	0.232	0.259	0.386	-0.273	0.333	0.592	0.079	0.261	0.286		0	-0.0154	0.136892		0.259	0.2096	0.283683		0.286	0.3102	0.184656		At1g21900	emp24/gp25L/p24 family protein similar to SP|O35587 Transmembrane protein Tmp21 precursor (21 kDa Transmembrane trafficking protein) {Mesocricetus auratus}; contains Pfam profile PF01105: emp24/gp25L/p24 family
A001409_01	At1g14150	0.012	0	0.145	-0.346	-0.1	-1.262	-1.19	-0.807	-0.775	-1.156	-1.464	-1.645	-0.872	-1.136	-1.347		0	-0.0578	0.183153		-1.156	-1.038	0.228984		-1.347	-1.2928	0.299145		At1g14150	oxygen evolving enhancer 3 (PsbQ) family protein extrinsic pII protein; contains Pfam profile PF05757: Oxygen evolving enhancer protein 3 (PsbQ)
A001410_01	At1g73540	0	0.254	-0.574	1.389	-0.089	1.978	0.439	2.683	1.576	2.546	1.481	0.225	1.512	0.559	-0.41		0	0.196	0.731292		1.978	1.8444	0.902847		0.559	0.6734	0.828157		At1g73540	MutT/nudix family protein low similarity to SP|Q09790 Diadenosine 5',5'''-P1,P6-hexaphosphate hydrolase (EC 3.6.1.-) (Ap6A hydrolase) {Schizosaccharomyces pombe}; contains Pfam profile PF00293: NUDIX domain
A001411_01	At1g73660	0	-0.099	0.717	0.06	-0.051	-0.37	-0.503	-0.51	-0.443	-0.239	-0.227	-0.388	-0.536	-0.397	-0.045		0	0.1254	0.335956		-0.443	-0.413	0.112399		-0.388	-0.3186	0.188065		At1g73660	protein kinase family protein contains Pfam profile: PF00069 eukaryotic protein kinase domain
A001412_01	At1g76990	0	-0.047	0.57	0.223	-0.198	0.37	0.316	0.07	0.093	-0.093	0.381	0.423	0.161	0.038	0.157		0	0.1096	0.298321		0.093	0.1512	0.190162		0.161	0.232	0.163542		At1g76990	ACT domain containing protein low similarity to uridylyltransferase SP|P56884 from Rhizobium meliloti; contains Pfam ACT domain PF01842
A001417_01	At1g17110	-0.217	-0.11	0.544	0.044	0	-0.095	-0.24	-0.255	-0.226	-0.04	-0.102	-0.097	-0.119	-0.348	0.082		0	0.0522	0.293017		-0.226	-0.1712	0.0971838		-0.102	-0.1168	0.152963		At1g17110	ubiquitin-specific protease 15 (UBP15) almost identical to ubiquitin-specific protease 15 GI:11993475 [Arabidopsis thaliana], 7 amino acid difference
A001418_01	At1g75220	0.223	0	-0.264	-0.084	0.186	-0.143	-0.093	0.016	0.265	-1.085	0.159	-0.201	-0.17	-0.077	-0.037		0	0.0122	0.200208		-0.093	-0.208	0.514899		-0.077	-0.0652	0.141973		At1g75220	integral membrane protein, putative strong similarity to integral membrane protein GI:1209756 from [Beta vulgaris]; contains Pfam profile PF00083: major facilitator superfamily protein
A001420_01	At1g27370	0	0.59	1.134	-0.014	-0.16	0.755	0.996	0.445	0.461	0.502	0.253	0.62	0.551	0.864	-0.02		0	0.31	0.54299		0.502	0.6318	0.239131		0.551	0.4536	0.342834		At1g27370	squamosa promoter-binding protein-like 10 (SPL10) identical to squamosa promoter binding protein-like 10 [Arabidopsis thaliana] GI:5931669; contains Pfam profile PF03110: SBP domain
A001421_01	At1g15690	0	-0.149	-0.009	0.506	0.161	0.194	0.005	0.072	-0.037	0.031	0.247	0.088	-0.059	0.001	0.368		0	0.1018	0.251208		0.031	0.053	0.0882185		0.088	0.129	0.17639		At1g15690	pyrophosphate-energized vacuolar membrane proton pump / pyrophosphate-energized inorganic pyrophosphatase (AVP-3) identical to pyrophosphate-energized vacuolar membrane proton pump (pyrophosphate-energized inorganic pyrophosphatase) SP:P31414 from [Arabid
A001423_01	At1g34550	0	0.172	0.773	-0.327	-0.225	-0.062	-0.026	0.113	0.364	0.322	-0.125	0.025	0.452	0.45	-0.581		0	0.0786	0.434102		0.113	0.1422	0.19517		0.025	0.0442	0.433257		At1g34550	expressed protein contains Pfam profile PF04765: Protein of unknown function (DUF616); expression supported by MPSS
A001426_01	At1g17210	0.022	0	-0.074	0.477	-0.126	-0.024	-0.182	0.153	-0.26	-0.682	0.337	0.452	0.192	0.189	0.172		0	0.0598	0.240564		-0.182	-0.199	0.312981		0.192	0.2684	0.12232		At1g17210	expressed protein distantly related to dentin phosphoryn [Homo sapiens] (GI:4322670)
A001428_01	At1g76080	0.123	-0.043	-0.464	0.041	0	-0.379	-0.288	-0.144	-0.239	-0.461	-0.181	-0.236	-0.166	-0.361	-0.358		0	-0.0686	0.229361		-0.288	-0.3022	0.12282		-0.236	-0.2604	0.0941504		At1g76080	thioredoxin family protein low similarity to thioredoxin (TRX) [Fasciola hepatica] GI:6687568; contains Pfam profile PF00085: Thioredoxin
A001429_01	At1g70710	-0.182	0.835	0.846	0	-0.02	1.831	1.378	0.009	0.503	0.215	0.982	0.748	0.126	0.6	0.511		0	0.2958	0.502239		0.503	0.7872	0.782998		0.6	0.5934	0.31631		At1g70710	endo-1,4-beta-glucanase (EGASE) / cellulase identical to endo-1,4-beta-glucanase GB:CAA67157 GI:2440035 from [Arabidopsis thaliana]
A001430_01	At1g73960	-0.217	-0.129	0.85	0.155	0	-0.059	-0.27	-0.214	-0.078	1.094	-0.201	-0.21	0.021	0.074	0.3		0	0.1318	0.425264		-0.078	0.0946	0.565763		0.021	-0.0032	0.212348		At1g73960	expressed protein similar to TATA binding protein associated factor (GI:2827282) [Homo sapiens]; similar to Transcription initiation factor TFIID 150 kDa subunit (TAFII-150) (TAFII150) (Swiss-Prot:Q24325) [Drosophila melanogaster]
A001432_01	At1g61900	0.111	-0.041	-0.756	0	0.082	-0.007	0.068	0.046	-0.401	-2.073	-0.233	-0.264	-0.419	-0.36	-0.588		0	-0.1208	0.360312		-0.007	-0.4734	0.914382		-0.36	-0.3728	0.141413		At1g61900	expressed protein contains similarity to glutamic acid/alanine-rich protein GI:6707830 from [Trypanosoma congolense]
A001435_01	At1g62510	0	-0.374	-0.582	0.073	0.055	-0.958	-1.234	-0.64	-0.942	-1.28	-1.316	-1.301	-1.363	-1.499	-1.261		0	-0.1656	0.295735		-0.958	-1.0108	0.258506		-1.316	-1.348	0.0919619		At1g62510	protease inhibitor/seed storage/lipid transfer protein (LTP) family protein contains Pfam protease inhibitor/seed storage/LTP family domain PF00234
A001436_01	At1g50460	0.289	-0.138	0.833	0	-0.43	0.633	0.284	0.2	0.72	1.044	0.276	0.015	0.342		0.054		0	0.1108	0.479576		0.633	0.5762	0.342655		0.165	0.17175	0.161543		At1g50460	hexokinase, putative similar to hexokinase 1 [Spinacia oleracea] Swiss-Prot:Q9SEK3
A001438_01	At1g73470	0	0.142	-1.037	-0.005	0.268	-0.157	-0.097	0.132	-0.284	-1.515	-0.106	-0.087	-0.335	-0.124	-0.188		0	-0.1264	0.521416		-0.157	-0.3842	0.649868		-0.124	-0.168	0.100784		At1g73470	expressed protein
A001439_01	At1g04790	0.01	0.24	-0.39	-0.051	0	0.019	0.155	-0.106	-0.077	-1.325	0.284	0.42	0.181	0.315	-0.054		0	-0.0382	0.226442		-0.077	-0.2668	0.600263		0.284	0.2292	0.179788		At1g04790	zinc finger (C3HC4-type RING finger) family protein contains Pfam profile: PF00097 zinc finger, C3HC4 type (RING finger)
A001441_01	At1g50250	0.007	-0.053	0.27	0	-0.246	-0.499	-0.736	-0.601	-0.366	-0.464	-0.91	-0.818	-0.52	-0.741	-1.038		0	-0.0044	0.184511		-0.499	-0.5332	0.141102		-0.818	-0.8054	0.194167		At1g50250	cell division protein ftsH homolog 1, chloroplast (FTSH1) (FTSH) identical to SP:Q39102 Cell division protein ftsH homolog 1, chloroplast precursor (EC 3.4.24.-) [Arabidopsis thaliana]
A001442_01	At1g10670	0.183	-0.126	-1.193	0.108	0	0.019	-0.08	-0.116	-0.362	-2.185	-0.247	-0.265	-0.597	-0.395	-0.299		0	-0.2056	0.564119		-0.116	-0.5448	0.927557		-0.299	-0.3606	0.143968		At1g10670	expressed protein
A001445_01	At1g09340	0	-0.226	0.027	-0.329	0.032	-0.916	-1.115	-0.799	-0.793	-0.856	-1.323	-1.373	-0.967	-1.179	-1.224		0	-0.0992	0.167232		-0.856	-0.8958	0.132268		-1.224	-1.2132	0.157712		At1g09340	expressed protein
A001446_01	At1g79690	0.039	-0.244	0	0.02	-0.312	0.107	-0.02	-0.186	-0.033	0.455	-0.072	0.025	-0.134	-0.238	-0.181		0	-0.0994	0.165378		-0.02	0.0646	0.241709		-0.134	-0.12	0.101452		At1g79690	MutT/nudix family protein contains Pfam NUDIX domain [PF00293]; very low similarity to Chain A and Chain B of Escherichia coli isopentenyl diphosphate:dimethylallyl diphosphate isomerase [gi:15826361] [gi:15826360]
A001448_01	At1g30630	0.007	0	0.155	-0.094	-0.068	0.3	0.209	0.05	0.37	0.229	0.015	0.206	0.047	0.126	0.184		0	0	0.0968685		0.229	0.2316	0.119718		0.126	0.1156	0.0833445		At1g30630	coatomer protein epsilon subunit family protein / COPE family protein similar to SP|O14579 Coatomer epsilon subunit (Epsilon-coat protein) (Epsilon-COP) from Homo sapiens, SP|Q60445 from Cricetulus griseus; ESTs gb|Z17908, gb|AA728673, gb|N96555, gb|H7633
A001453_01	At1g55820	-0.021	-0.226	0.21		0.021	-0.523	-0.77	-0.373	-0.276	0.009	-0.568	-0.662	-0.31	-0.399	-0.386		0	-0.004	0.17888		-0.373	-0.3866	0.289187		-0.399	-0.465	0.144948		At1g55820	hydroxyproline-rich glycoprotein family protein
A001455_01	At1g25260	-0.033	0.414	0.668	-0.175	0	0.874	0.692	-0.184	0.066	-0.19	0.718	0.828	0.315	0.566	0.757		0	0.1748	0.352335		0.066	0.2516	0.500135		0.718	0.6368	0.203818		At1g25260	acidic ribosomal protein P0-related contains similarity to 60S acidic ribosomal protein GI:5815233 from [Homo sapiens]
A001457_01	At1g19880	-0.021	0	0.247	0.038	-0.257	0.26	0.026	-0.264	-0.317	-0.115	-0.121	-0.092	-0.234	-0.014	-0.001		0	0.0014	0.179536		-0.115	-0.082	0.233488		-0.092	-0.0924	0.0940335		At1g19880	regulator of chromosome condensation (RCC1) family protein low similarity to UVB-resistance protein UVR8 [Arabidopsis thaliana] GI:5478530; contains Pfam profile PF00415: Regulator of chromosome condensation (RCC1)
A001459_01	At1g19860	-0.216	-0.022	0	0.27	0.001	-0.409	-0.73	-0.46	-0.176	0.068	-0.309	-0.467	-0.361	-0.429	-0.234		0	0.0066	0.173077		-0.409	-0.3414	0.301915		-0.361	-0.36	0.0931236		At1g19860	zinc finger (CCCH-type) family protein contains Pfam domain, PF00642: Zinc finger C-x8-C-x5-C-x3-H type (and similar)
A001460_01	At1g73490	0.531	0.567	0	-0.189	-0.049	0.83	0.606	0.491	0.346	-0.741	0.73	0.805	0.654	0.667	0.481		0	0.172	0.351302		0.491	0.3064	0.61168		0.667	0.6674	0.120184		At1g73490	RNA recognition motif (RRM)-containing protein contains INTERPRO:IPR000504 RNA-binding region RNP-1 (RNA recognition motif) domain
A001461_01	At1g63980	0.082	0.191	-0.939	0	-0.56	-0.451	-0.051	-0.307	-0.578	-2.223	-0.525	0.132	-0.369	-0.122	-1.01		0	-0.2452	0.484229		-0.451	-0.722	0.861633		-0.369	-0.3788	0.432073		At1g63980	D111/G-patch domain-containing protein contains Pfam profile PF01585: G-patch domain
A001465_01	At1g12840	0.065	-0.117	-0.912	0	0.044	0.025	0.05	-0.179	-0.044	-0.362	0.1	0.093	-0.111	-0.05	0.152		0	-0.184	0.413012		-0.044	-0.102	0.170386		0.093	0.0368	0.111583		At1g12840	vacuolar ATP synthase subunit C (VATC) / V-ATPase C subunit / vacuolar proton pump C subunit (DET3) identical to vacuolar ATP synthase subunit C SP:Q9SDS7 from [Arabidopsis thaliana]
A001467_01	At1g78560	0.134	0	0.515	-0.24	-0.028	-0.132	0.002	0.06	0.094	0.565	-0.144	-0.087	0.089	0.022	0.053		0	0.0762	0.279523		0.06	0.1178	0.264436		0.022	-0.0134	0.0982614		At1g78560	bile acid:sodium symporter family protein low similarity to SP|Q12908 Ileal sodium/bile acid cotransporter {Homo sapiens}; contains Pfam profile PF01758: Sodium Bile acid symporter family
A001468_01	At1g53910	0.057	0	-1.105	0.138	-0.056	0.668	0.78	0.349	0.413	-0.534	0.821	0.968	0.58	0.577	0.77		0	-0.1932	0.514738		0.413	0.3352	0.51729		0.77	0.7432	0.167005		At1g53910	AP2 domain-containing protein RAP2.12 (RAP2.12) identical to AP2 domain containing protein GI:2281649 from [Arabidopsis thaliana]
A001472_01	At1g26920	0.002	-0.225	-0.087	0	0.173	-0.511	-0.586	-0.51	-0.878	-1.378	-0.507	-0.518	-0.701	-0.635	-0.242		0	-0.0274	0.145235		-0.586	-0.7726	0.370753		-0.518	-0.5206	0.175671		At1g26920	expressed protein Location of EST 228A16T7A, gb|N65686
A001475_01	At1g11930	0	-0.087	-0.371	0.392	0.279	0.09	0.146	-0.151	-0.192	-1.016	0.178	0.261	-0.108	0.012	0.269		0	0.0426	0.303167		-0.151	-0.2246	0.466131		0.178	0.1224	0.165125		At1g11930	alanine racemase family protein contains Pfam domain, PF01168: Alanine racemase, N-terminal domain
A001477_01	At1g14380	0	-0.219	-0.439	0.214	0.387	-0.209	-0.197	-0.088	-0.307	0.204	-0.167	-0.165	-0.358	-0.26	-0.17		0	-0.0114	0.329999		-0.197	-0.1194	0.196734		-0.17	-0.224	0.0849971		At1g14380	calmodulin-binding family protein contains Pfam profile PF00612: IQ calmodulin-binding motif
A001479_01	At1g79810	-0.007	0.313	-0.604	0.039	0	-0.182	-0.14	-0.028	0.101	-1.278	0.057	0.168	0.082	0.286	0.08		0	-0.0518	0.33576		-0.14	-0.3054	0.554673		0.082	0.1346	0.094614		At1g79810	Pex2/Pex12 N-terminal domain-containing protein / zinc finger (C3HC4-type RING finger) family protein contains Pfam profiles PF00097: zinc finger C3HC4 type (RING finger), PF04757: Pex2/Pex12 amino terminal region
A001481_01	At1g19740	-0.033	0	-0.708	0.452	0.298	-0.401	-0.365	-0.203	-0.092	-0.244	-0.23	-0.48	-0.347	-0.469	0.165		0	0.0018	0.445939		-0.244	-0.261	0.12513		-0.347	-0.2722	0.264779		At1g19740	ATP-dependent protease La (LON) domain-containing protein weak similarity to SP|P36774 ATP-dependent protease La 2 (EC 3.4.21.53) {Myxococcus xanthus}; contains Pfam profile PF02190: ATP-dependent protease La (LON) domain
A001483_01	At1g19700	0.002	0	-0.577	-0.126	0.202	-0.627	-0.607	-0.577	-0.643	-1.547	-0.673		-0.552	-0.623	-0.761		0	-0.0998	0.291467		-0.627	-0.8002	0.4182		-0.648	-0.65225	0.0878687		At1g19700	homeobox-leucine zipper family protein similar to BEL1-like homeodomain 1 (GI:13877517) [Arabidopsis thaliana]; similar to homeodomain protein GI:7239157 from (Malus domestica); contains weak hit to Pfam profile PF00046: Homeobox domain
A001487_01	At1g09270	0	-0.114	0.142	0.117	-0.353	0.134	-0.129	0.044	-0.005	-0.61	0.081	0.157	0.018	0.147	-0.281		0	-0.0416	0.201746		-0.005	-0.1132	0.293508		0.081	0.0244	0.179671		At1g09270	importin alpha-1 subunit, putative (IMPA4) similar to importin alpha-1 subunit (Karyopherin alpha-1 subunit, KAP alpha) [Arabidopsis thaliana] SWISS-PROT:Q96321
A001488_01	At1g62750	0	0.053	-0.523	0.006	-0.233	-0.92	-0.876	-0.814	-0.641	-1.499	-0.897	-1.019	-0.771	-0.859	-1.11		0	-0.1394	0.24161		-0.876	-0.95	0.324713		-0.897	-0.9312	0.133907		At1g62750	elongation factor Tu family protein similar to elongation factor G SP:P34811 [Glycine max (Soybean)]
A001490_01	At1g19870	-0.017	0.155	0	0.37	-0.132	0.335	0.241	0.147	-0.182	-0.721	0.552	0.498	0.175	0.468	0.471		0	0.0752	0.193883		0.147	-0.036	0.429651		0.471	0.4328	0.148002		At1g19870	calmodulin-binding family protein contains Pfam profile: PF00612 IQ calmodulin-binding motif
A001491_01	At1g67870	0.245	0	-1.487	0.352	-0.235	0.127	0.013	0.317	0.026	-0.349	-0.585	-0.684	-0.617	-0.328	-0.185		0	-0.225	0.741147		0.026	0.0268	0.242731		-0.585	-0.4798	0.213037		At1g67870	glycine-rich protein contains non-consensus GG donor splice site at exon2; modeled to est match.
A001495_01	At1g52890	0.332	0.187	-1.019	0	-0.609	-0.202	-0.658	-0.295	0.015	-0.231	0.59	0.643	0.763	0.574	0.72		0	-0.2218	0.571939		-0.231	-0.2742	0.244157		0.643	0.658	0.0818138		At1g52890	no apical meristem (NAM) family protein contains Pfam PF02365: No apical meristem (NAM) domain; similar to NAM (no apical meristem) GB:CAA63101 from [Petunia x hybrida]
A001496_01	At1g15260	0	0.017	-0.008	-0.065	0.193	-0.419	-0.23	-0.376	-0.893	-1.088	-0.233	-0.376	-0.633	-0.568	-0.442		0	0.0274	0.0975618		-0.419	-0.6012	0.368722		-0.442	-0.4504	0.158146		At1g15260	expressed protein EST gb|N65467 comes from this gene
A001501_01	At1g13870	0	-0.074	-0.281	0.071	0.177	0.322	0.196	0.28	0.101	-0.119	0.215	0.29	0.155	0.158	0.345		0	-0.0214	0.172132		0.196	0.156	0.175486		0.215	0.2326	0.0834044		At1g13870	expressed protein similar to KTI12 protein (SP:P34253) {Saccharomyces cerevisiae}; contains Prosite PS00070: Aldehyde dehydrogenases cysteine active site
A001503_01	At1g17360	0.302	0	-0.058	0.108	-0.248	-0.138	-0.168	-0.118	0.117	-1.07	-0.625	-0.188	-0.135	-0.097	-0.823		0	0.0208	0.203453		-0.138	-0.2754	0.458409		-0.188	-0.3736	0.329032		At1g17360	COP1-interacting protein-related similar to COP1-Interacting Protein 7 (CIP7) (GI:3327870) [Arabidopsis thaliana]
A001507_01	At1g52220	0.243	0	0.155	-0.319	-0.042	-0.173	-0.149	0.014	-0.053	0.235	-0.396	-0.351	-0.195	-0.23	-0.249		0	0.0074	0.215827		-0.053	-0.0252	0.163695		-0.249	-0.2842	0.085286		At1g52220	expressed protein
A001513_01	At1g09620	-0.147	0.01	0.178	0	-0.413	0.248	0.237	0.132	0.092	-0.113	0.4	0.275	0.519	0.559	0.467		0	-0.0744	0.22152		0.132	0.1192	0.14602		0.467	0.444	0.111665		At1g09620	tRNA synthetase class I (I, L, M and V) family protein similar to cytosolic leucyl-tRNA synthetase [Candida albicans] GI:9858190; contains Pfam profile PF00133: tRNA synthetases class I (I, L, M and V)
A001516_01	At1g77370	0.014	0.029	-0.131	-0.024	0	0.287	0.108	0.23	0.422	0.265	0.339	0.415	0.287	0.49	0.25		0	-0.0224	0.0637675		0.265	0.2624	0.112886		0.339	0.3562	0.0971118		At1g77370	glutaredoxin, putative similar to glutaredoxin [Ricinus communis] gi|1732424|emb|CAA89699
A001518_01	At1g09750	0.064	-0.287	0	-0.052	0.301	-0.283	0.369	-0.895	-1.04	-0.309	-1.146	-1.164	-0.852	-0.834	-0.361		0	0.0052	0.211917		-0.309	-0.4316	0.561908		-0.852	-0.8714	0.325309		At1g09750	chloroplast nucleoid DNA-binding protein-related contains Pfam profile PF00026: Eukaryotic aspartyl protease;b similar to CND41, chloroplast nucleoid DNA binding protein (GI:2541876) [Nicotiana tabacum]
A001521_01	At1g73380	0	0.104	-0.188	0.023	-0.013	0.528	0.508	0.435	0.398	0.191	0.753	0.853	0.76	0.77	0.627		0	-0.0148	0.106961		0.435	0.412	0.134386		0.76	0.7526	0.0809525		At1g73380	expressed protein
A001526_01	At1g73400	-0.284	0	0.244	-0.008	0.024	-0.52	-0.37	-0.061	-0.816	0.201	-0.156	-0.368			-0.226		0	-0.0048	0.187561		-0.37	-0.3132	0.395856		-0.226	-0.25	0.108019		At1g73400	pentatricopeptide (PPR) repeat-containing protein contains Pfam profile PF01535: PPR repeat
A001529_01	At1g08750	0.263	0.233	-0.068	0	-0.216	-0.067	0.017	0.312	-0.137		-0.051	0.32	0.096	0.106	-0.23		0	0.0424	0.203562		-0.025	0.03125	0.197471		0.096	0.0482	0.204167		At1g08750	GPI-anchor transamidase, putative similar to SP|P49018 GPI-anchor transamidase (EC 3.-.-.-) (GPI transamidase) {Saccharomyces cerevisiae}; contains Pfam profile PF01650: Peptidase C13 family
A001532_01	At1g32740	0	0.109	0.535	-0.3	-0.375	0.751	0.567	0.275	0.457	0.363	0.43	0.447	0.603	0.634	0.244		0	-0.0062	0.363503		0.457	0.4826	0.185216		0.447	0.4716	0.156347		At1g32740	expressed protein
A001535_01	At1g01910	0.037	-0.154	-0.853	0	0.195	-0.007	-0.018	-0.187	-0.155	-1.585	0.186	0.205	-0.137	-0.025	0.352		0	-0.155	0.409449		-0.155	-0.3904	0.672594		0.186	0.1162	0.195197		At1g01910	anion-transporting ATPase, putative similar to SP|O43681 Arsenical pump-driving ATPase (EC 3.6.3.16) (Arsenite-translocating ATPase) (Arsenical resistance ATPase) (Arsenite-transporting ATPase) (ARSA) (ASNA-I) {Homo sapiens}; contains Pfam profile PF02374
A001536_01	At1g01960	-0.022	0	0.224	0.342	-0.074	0.348	0.327	0.301	0.272	0.54	0.608	0.312	0.431	0.369	1.058		0	0.094	0.179527		0.327	0.3576	0.105865		0.431	0.5556	0.302009		At1g01960	guanine nucleotide exchange family protein similar to guanine nucleotide exchange factor [Homo sapiens] GI:5456754; contains Pfam profile PF01369: Sec7 domain
A001537_01	At1g10840	0.05	0.152	-0.791	-0.046	0	0.151	0.033	-0.124	-0.124	-1.949	0.465	0.346	0.197	0.213	0.211		0	-0.127	0.378403		-0.124	-0.4026	0.872182		0.213	0.2864	0.116742		At1g10840	eukaryotic translation initiation factor 3 subunit 3 / eIF-3 gamma / eIF3h (TIF3H1) identical to SP|Q9C5Z2 Eukaryotic translation initiation factor 3 subunit 3 (eIF-3 gamma) (eIF3 p38 subunit) (eIF3h) {Arabidopsis thaliana}; contains Pfam profile PF01398:
A001540_01	At1g65520		0.022	-0.29		0	-0.243	0.239	0.645	0.591	0.72	0.456	0.499	0.794	0.488	0.642		0	-0.0893333	0.17413		0.591	0.3904	0.399317		0.499	0.5758	0.14138		At1g65520	enoyl-CoA hydratase/isomerase family protein low similarity to enoyl-CoA hydratase [Escherichia coli] GI:2764828, carnitine racemase SP|P31551 [Escherichia coli]; contains Pfam profile PF00378 enoyl-CoA hydratase/isomerase family protein
A001552_01	At1g30570	0	-0.241	0.419	0.198	-0.09	-0.312	-0.253	-0.166	-0.384	0.673	-0.643	-0.452	-0.418	-0.464	-0.571		0	0.0572	0.25719		-0.253	-0.0884	0.433077		-0.464	-0.5096	0.0940122		At1g30570	protein kinase family protein contains protein kinase domain, Pfam:PF00069
A001553_01	At1g30580	0.159	0.132	-1	0	-0.194	0.366	0.255	0.035	0.132	-1.993	0.456	0.719	0.306	0.45	0.053		0	-0.1806	0.478868		0.132	-0.241	0.987329		0.45	0.3968	0.243203		At1g30580	expressed protein
A001557_01	At1g05060	-0.243	0	-0.815	0.027	0.207	0.081	0.201	0.149	-0.039	-0.632	0.365	0.553	0.103	0.209	0.507		0	-0.1648	0.397195		0.081	-0.048	0.338596		0.365	0.3474	0.191663		At1g05060	expressed protein
A001558_01	At1g65290	0.171	-0.073	0	-0.012	0.218	0.401	0.324	0.064	0.167	0.055	0.221	0.268	-0.047	-0.09	0.683		0	0.0608	0.126249		0.167	0.2022	0.155212		0.221	0.207	0.309523		At1g65290	acyl carrier family protein / ACP family protein similar to SP|P53665 Acyl carrier protein, mitochondrial precursor (ACP) (NADH-ubiquinone oxidoreductase 9.6 kDa subunit) (MtACP-1) {Arabidopsis thaliana}; contains InterPro accession IPR003881: Isochorisma
A001559_01	At1g65295	0.203	0	-0.032	-0.168	0.244	0.051	0.15	0.235	0.198	-0.765	-0.215	-0.29	-0.189	-0.461	-0.362		0	0.0494	0.171604		0.15	-0.0262	0.418725		-0.29	-0.3034	0.111078		At1g65295	expressed protein
A001566_01	At1g29900	-0.079	-0.159	0.506	0.377	0	0.362	0.395	-0.116	0.064	0.884	0.702	0.305	0.502	0.594	0.64		0	0.129	0.294314		0.362	0.3178	0.381147		0.594	0.5486	0.154482		At1g29900	carbamoyl-phosphate synthase family protein similar to carbamoylphosphate synthetase GI:6552726 from [Medicago sativa]; contains Pfam profiles PF02786: Carbamoyl-phosphate synthase L chain ATP binding domain, PF00289: Carbamoyl-phosphate synthase L chain
A001567_01	At1g07040	0	0.041	-0.958	-0.062	0.587	-0.337	-0.307	-0.1	-0.406	-1.422	0.205	0.109	-0.065	-0.261	0.565		0	-0.0784	0.556131		-0.337	-0.5144	0.520024		0.109	0.1106	0.309966		At1g07040	expressed protein
A001568_01	At1g09100	-0.046	0.117	-0.172	0.193	0	0.337	0.378	0.509	0.6	0.547	0.768	0.669	0.665	0.668	0.888		0	0.0184	0.142254		0.509	0.4742	0.112266		0.669	0.7316	0.0977052		At1g09100	26S protease regulatory subunit 6A, putative identical to SP:O04019 from [Arabidopsis thaliana]
A001569_01	At1g12650	0.029	0	0.534	-0.46	-0.319	0.358	0.125	-0.164	-0.139	-0.703	0.558	0.571	0.186	0.271	-0.008		0	-0.0432	0.384066		-0.139	-0.1046	0.396708		0.271	0.3156	0.248741		At1g12650	expressed protein similar to KED (GI:8096269) [Nicotiana tabacum]; similar to rRNA processing protein EBP2 (SP:P36049) [Saccharomyces cerevisiae]
A001572_01	At1g51100	0.125	0	-0.051	-0.123	0.116	-0.108	0.064	-0.442	-0.649	-1.085	0.027	0.152	0.003	-0.273	0.127		0	0.0134	0.107137		-0.442	-0.444	0.453836		0.027	0.0072	0.168998		At1g51100	expressed protein
A001573_01	At1g01290	-0.021	0.178	0.399	0	-0.197	0.022	0.036	-0.012	-0.149	0.075	-0.07	0.068	0.044	0.304	-0.182		0	0.0718	0.22603		0.022	-0.0056	0.0860134		0.044	0.0328	0.181398		At1g01290	molybdopterin biosynthesis CNX3 protein / molybdenum cofactor biosynthesis enzyme CNX3 (CNX3) identical to molybdopterin biosynthesis CNX3 protein SP|Q39056 from [Arabidopsis thaliana]
A001578_01	At1g51060	0.052	0.119	-0.076	0	-0.102	0.276	0.129	-0.177	-0.154	-0.529	-0.398	-0.142	-0.435	-0.416	-0.809		0	-0.0014	0.0908779		-0.154	-0.091	0.310764		-0.416	-0.44	0.238396		At1g51060	histone H2A, putative similar to histone H2A GI:7595337 from Arabidopsis thaliana, Triticum aestivum GI:536892, Picea abies SP|P35063; contains Pfam profile PF00125 Core histone H2A/H2B/H3/H4
A001582_01	At1g30210	0	-0.08	-0.926	0.103	0.013	-0.057	0.124	0.03	-0.227	-0.405	0.09	0.157	-0.086	-0.049	0.218		0	-0.178	0.423153		-0.057	-0.107	0.210852		0.09	0.066	0.130662		At1g30210	TCP family transcription factor, putative similar to TFPD (GI:6681577) [Arabidopsis thaliana]; contains similarity to cyc1A protein GI:6358548 from [Antirrhinum graniticum]
A001585_01	At1g66920	0.052	0.294	-0.449	0	-0.405	0.935	1.186	1.539	1.955	0.571	1.317	1.599	1.682	1.638	1.089		0	-0.1016	0.317472		1.186	1.2372	0.53481		1.599	1.465	0.254093		At1g66920	serine/threonine protein kinase, putative similar to receptor serine/threonine kinase PR55K gi|1235680|gb|AAC49208; contains protein kinase domain, Pfam:PF00069; contains serine/threonine protein kinase domain, INTERPRO:IPR002290
A001590_01	At1g61140	0	0.087	-0.197	0.004	-0.497	-0.141	-0.3	-0.016	0.79		-0.572	-0.429	-0.181	0.073	-0.305		0	-0.1206	0.234884		-0.078	0.08325	0.485288		-0.305	-0.2828	0.246202		At1g61140	SNF2 domain-containing protein / helicase domain-containing protein / zinc finger protein-related similar to ATPase [Homo sapiens] GI:531196; contains Pfam profiles PF00271: Helicase conserved C-terminal domain, PF00176: SNF2 family N-terminal domain, PF0
A001593_01	At1g61100	0.339	-0.125	0.624	0	-0.156	0.801	0.589	0.61	0.905	1.353	0.152	-0.371	0.544	0.266	-0.174		0	0.1364	0.335869		0.801	0.8516	0.309896		0.152	0.0834	0.361571		At1g61100	disease resistance protein (TIR class), putative domain signature TIR exists, suggestive of a disease resistance protein.
A001595_01	At1g26300	0	0.03	0.648	-0.111	-0.06	0.235	0.308	0.37	0.47	0.601	0.246	0.215	0.336	0.284	0.344		0	0.1014	0.310369		0.37	0.3968	0.143037		0.284	0.285	0.0559106		At1g26300	BSD domain-containing protein contains Pfam profile PF03909: BSD domain
A001596_01	At1g08315	-0.204	0	-1.378	0.493	0.409	0.013	-0.112	0.287	0.132	-0.263	0.315	0.403		-0.037	1.027		0	-0.136	0.75139		0.013	0.0114	0.212735		0.359	0.427	0.442875		At1g08315	armadillo/beta-catenin repeat family protein contains Pfam profile: PF00514 armadillo/beta-catenin-like repeat
A001599_01	At1g04620	-0.108	0.313	-0.224	0	0.312	-0.709	-0.664	-0.156	-0.366	-1.429	-0.099	-0.149	-0.364	-0.135	-0.368		0	0.0586	0.24494		-0.664	-0.6648	0.483248		-0.149	-0.223	0.131816		At1g04620	coenzyme F420 hydrogenase family / dehydrogenase, beta subunit family contains Pfam PF04432: Coenzyme F420 hydrogenase/dehydrogenase, beta domain; similar to Coenzyme F420 hydrogenase beta subunit (SP:Q00391) {Methanobacterium thermoautotrophicum}
A001601_01	At1g31810	0.082	-0.059	0.37	0	-0.561	-0.14	-0.134	-0.32	-0.195	0.351	-0.237	-0.133	-0.049	-0.046	-0.492		0	-0.0336	0.337706		-0.14	-0.0876	0.256327		-0.133	-0.1914	0.185249		At1g31810	formin homology 2 domain-containing protein / FH2 domain-containing protein low similarity to SP|P48608 Diaphanous protein {Drosophila melanogaster}; contains Pfam profile PF02181: Formin Homology 2(FH2) Domain
A001602_01	At1g04590	-0.036	0.021	0.075	-0.153	0	-0.055	0.044	-0.122	-0.268	0.083	0.103	-0.016	0.106	0.035	0.009		0	-0.0186	0.0852074		-0.055	-0.0636	0.13994		0.035	0.0474	0.0551661		At1g04590	expressed protein isoform contains GG acceptor splice site at intron 7
A001604_01	At1g31910	0.114	0	-0.558	0.068	-0.233	0.213	0.202	0.018	0.424	-0.864	0.265	0.359	0.07	0.203	-0.138		0	-0.1218	0.277982		0.202	-0.0014	0.50318		0.203	0.1518	0.19303		At1g31910	GHMP kinase family protein contains TIGRFAM profile TIGR01219: phosphomevalonate kinase; contains Pfam PF00288: GHMP kinases putative ATP-binding protein domain; similar to Phosphomevalonate kinase (EC 2.7.4.2) (Swiss-Prot:P24521) [Saccharomyces cerevisia
A001606_01	At1g04530	0.288	0.273	-0.508	0	-0.286	0.231	0.112	0.012	0.271	-1.313	-0.159	0.362	-0.048	0.151	-0.641		0	-0.0466	0.348739		0.112	-0.1374	0.665031		-0.048	-0.067	0.377447		At1g04530	expressed protein
A001607_01	At1g31790		0	0.433	-0.155		-0.272	0.156	0.295	0.292	0.841	0.129	0.49	0.631	0.388	0.759		0	0.0926667	0.304756		0.292	0.2624	0.398002		0.49	0.4794	0.241042		At1g31790	pentatricopeptide (PPR) repeat-containing protein contains Pfam profile PF01535: PPR repeat
A001609_01	At1g32070	-0.044	0	0.075	-0.158	0.047	-0.465	-0.508	-0.378	-0.261	-0.358	-0.723	-0.758	-0.516	-0.508	-0.696		0	-0.016	0.0914522		-0.378	-0.394	0.0965376		-0.696	-0.6402	0.11911		At1g32070	GCN5-related N-acetyltransferase (GNAT) family protein / nuclear shuttle interacting protein (NSI) very low similarity to SP|P09453 Ribosomal-protein-alanine acetyltransferase (EC 2.3.1.128) {Escherichia coli}; contains Pfam profile PF00583: acetyltransfe
A001611_01	At1g25540	-0.202	0	0.434	0.229	-0.406	0.306	0.366	0.505	0.371		0.409	0.629	0.127	0.62	0.833		0	0.011	0.333853		0.368	0.387	0.0840278		0.62	0.5236	0.267654		At1g25540	phytochrome and flowering time regulatory protein (PFT1) PMID: 12815435
A001614_01	At1g55080	0.108	-0.241	-0.122	0.127	0	0.253	-0.088	-0.062	0.251	-0.075	0.301	0.431	-0.058	-0.131	0.484		0	-0.0256	0.15611		-0.062	0.0558	0.179342		0.301	0.2054	0.28293		At1g55080	expressed protein
A001615_01	At1g24100	0.053	0	-1.315	0.095	-0.398	0.448	0.334	0.283	1.044	-0.462	0.163	0.439	0.269	0.067	-0.078		0	-0.313	0.593637		0.334	0.3294	0.536937		0.163	0.172	0.196408		At1g24100	UDP-glucoronosyl/UDP-glucosyl transferase family protein contains Pfam profile: PF00201 UDP-glucoronosyl and UDP-glucosyl transferase
A001617_01	At1g24140	0	0.334	-0.68	-0.02	1.225	0.64	0.555	1.806	2.205	1.259	0.651	-0.071	0.808	0.184	0.588		0	0.1718	0.694155		1.259	1.293	0.718874		0.588	0.432	0.363382		At1g24140	matrixin family protein similar to matrix metalloproteinase [Cucumis sativus] GI:7159629; contains InterPro accession IPR001818: Matrixin
A001619_01	At1g24160	-0.109	0.1	0.253	-0.117	0	-0.419	-0.24	0.06	-0.483	-1.067	-0.242	-0.323	-0.288	-0.171	-0.356		0	0.0254	0.155204		-0.419	-0.4298	0.413793		-0.288	-0.276	0.0723429		At1g24160	expressed protein Location of EST gb|H36355
A001621_01	At1g56310	0	0.165	0.271	-0.258	-0.159	-0.239	-0.445	-0.11	-0.39	0.11	-0.381	-0.281	-0.256	-0.003	-0.779		0	0.0038	0.219339		-0.239	-0.2148	0.224026		-0.281	-0.34	0.282183		At1g56310	3'-5' exonuclease domain-containing protein contains Pfam profile PF01612: 3'-5' exonuclease
A001624_01	At1g50950	0.02	0	0.242	-0.268	-0.705	0.184	0.403	0.368	0.35	-0.08	0.247	0.545	0.488	0.433	-0.097		0	-0.1422	0.362874		0.35	0.245	0.20029		0.433	0.3232	0.260185		At1g50950	thioredoxin-related contains weak hit to Pfam PF00085: Thioredoxin; contains 2 predicted transmembrane domains
A001630_01	At1g35830	0	-0.036	-0.271	0.161	0.036	-0.258	-0.308	-0.399	-0.598	-1.251	-0.042	0.017	-0.256	-0.12	-0.072		0	-0.022	0.157745		-0.399	-0.5628	0.406053		-0.072	-0.0946	0.102989		At1g35830	VQ motif-containing protein contains PF05678: VQ motif
A001631_01	At1g35910	0	0.043	-0.582	0.043	-0.115	0.575	0.239	0.175	0.281	-1.219	0.354	0.586	0.051	0.263	0.266		0	-0.1222	0.265039		0.239	0.0102	0.704055		0.266	0.304	0.193105		At1g35910	trehalose-6-phosphate phosphatase, putative similar to trehalose-6-phosphate phosphatase (AtTPPB) [Arabidopsis thaliana] GI:2944180; contains Pfam profile PF02358: Trehalose-phosphatase
A001641_01	At1g79030	0.1	0.098	-0.034	0	-0.566	-0.336	-0.499	-0.101	-0.258	-0.209		-0.397	-0.219	-0.011	-0.649		0	-0.0804	0.277847		-0.258	-0.2806	0.14888		-0.308	-0.319	0.270708		At1g79030	DNAJ heat shock N-terminal domain-containing protein / S-locus protein, putative similar to S-locus protein 5 (GI:6069485) [Brassica rapa]; contains Pfam profile PF00226 DnaJ domain
A001648_01	At1g31440	-0.31	-0.139	0.812	0	0.106	-0.6	-0.339	-0.293	-0.237	0.357	-0.333	-0.309	-0.076	-0.167	-0.408		0	0.0938	0.4307		-0.293	-0.2224	0.352519		-0.309	-0.2586	0.134284		At1g31440	SH3 domain-containing protein 1 (SH3P1) nearly identical to SH3 domain-containing protein 1 [Arabidopsis thaliana] GI:16974676; contains Pfam profile PF00018: SH3 domain
A001651_01	At1g33265	0.124	0	-0.377	-0.173	0.333	0.583	0.494	0.876	1.291	1.683	0.789	0.51	0.988	0.331	0.568		0	-0.0186	0.272302		0.876	0.9854	0.49885		0.568	0.6372	0.255358		At1g33265	expressed protein contains Pfam profile PF03647: Uncharacterised protein family (UPF0136); supporting cDNA gi|23198247|gb|BT000332.1|
A001653_01	At1g66080	0.076	0.004	0	-0.027	-0.069	0.745	0.433	0.942	1.353	1.279	0.173	0.546	0.359	0.305	0.324		0	-0.0032	0.0529877		0.942	0.9504	0.380798		0.324	0.3414	0.13431		At1g66080	expressed protein
A001654_01	At1g79020	-0.004	-0.029	0.099	0.181	0	-0.314	-0.347	-0.258	-0.158	0.532	-0.205	-0.19	-0.337	-0.16	-0.006		0	0.0494	0.0883419		-0.258	-0.109	0.365429		-0.19	-0.1796	0.118374		At1g79020	transcription factor-related similar to enhancer of polycomb (GI:3757890) [Drosophila melanogaster]; similar to enhancer of polycomb (GI:11907923) [Homo sapiens]
A001655_01	At1g66190	0.272	0	-0.419	-0.047	0.283	-0.503	-0.507	-0.232	-0.362	-0.616	-0.903	-0.941	-0.73	-0.716	-0.527		0	0.0178	0.287341		-0.503	-0.444	0.148914		-0.73	-0.7634	0.16604		At1g66190	expressed protein ; expression supported by MPSS
A001660_01	At1g12070		-0.024	0.426	0		-0.536	-0.422	-0.409	-0.23	0.122	-0.429	-0.707	-0.39	-0.249	-0.601		0	0.134	0.253164		-0.409	-0.295	0.257546		-0.429	-0.4752	0.180359		At1g12070	Rho GDP-dissociation inhibitor family protein similar to SP|P52565 Rho GDP-dissociation inhibitor 1 (Rho GDI 1) (Rho-GDI alpha) {Homo sapiens}; contains Pfam profile PF02115: RHO protein GDP dissociation inhibitor
A001663_01	At1g11960	-0.075	0	0.219	0.185	-0.009	0.992	0.64	1.042	1.169	1.521	0.674	-0.25	0.69	-0.066	-0.153		0	0.064	0.129819		1.042	1.0728	0.318171		-0.066	0.179	0.463798		At1g11960	early-responsive to dehydration protein-related / ERD protein-related low similarity to ERD4 protein [Arabidopsis thaliana] GI:15375406
A001664_01	At1g28110		-0.201	0.443		0	0.507	0.205	-0.194	-0.031	0.712	-0.249	-0.341	-0.089	0.166	-0.147		0	0.0806667	0.329491		0.205	0.2398	0.373194		-0.147	-0.132	0.192515		At1g28110	serine carboxypeptidase S10 family protein similar to H.vulgare gene encoding serine carboxypeptidase II, CP-MII GI:1731989
A001668_01	At1g11905	0.126	-0.03	-0.935	0.01	0	0.229	0.147	0.376	0.383	-0.421	0.217	0.292	0.155	0.258	0.021		0	-0.1658	0.434066		0.229	0.1428	0.33068		0.217	0.1886	0.106693		At1g11905	expressed protein
A001669_01	At1g11900	0.217	0	0.466	-0.141	-0.249	-0.391	-0.236	0.029	-0.165	0.115	-0.19	-0.151	-0.061	-0.104	-0.251		0	0.0586	0.286774		-0.165	-0.1296	0.203646		-0.151	-0.1514	0.0738735		At1g11900	pentatricopeptide (PPR) repeat-containing protein contains Pfam profile PF01535: PPR repeat
A001671_01	At1g27980	0	0.096	0.493	-0.063	-0.179	0.004	0.095	0.189	0.641	0.886	0.739	0.736	1.37	1.044	0.415		0	0.0694	0.256999		0.189	0.363	0.381377		0.739	0.8608	0.361246		At1g27980	pyridoxal-dependent decarboxylase family protein similar to sphingosine-1-phosphate lyase [Homo sapiens] GI:10129683; contains Pfam profile PF00282: Pyridoxal-dependent decarboxylase conserved domain
A001675_01	At1g52340	-0.007	0.083	0.512	-0.137	0	-0.222	-0.267	-0.21	-0.571	-0.231	-0.561	-0.437	-0.304	-0.356	-0.481		0	0.0902	0.248581		-0.231	-0.3002	0.152868		-0.437	-0.4278	0.101414		At1g52340	short-chain dehydrogenase/reductase (SDR) family protein similar to stem secoisolariciresinol dehydrogenase GI:13752458 from [Forsythia x intermedia]
A001677_01	At1g55300	0.053	0	0.035	-0.334	-0.039	-0.128	-0.11	-0.073	-0.005	-0.23	-0.194	-0.008	-0.175	-0.024	-0.186		0	-0.057	0.158797		-0.11	-0.1092	0.0823329		-0.175	-0.1174	0.0929828		At1g55300	TATA-binding protein-associated factor TAFII55 family protein contains Pfam profile: PF04658 TAFII55 protein conserved region
A001678_01	At1g55190	0	-0.006	-0.427	0.106	0.33	0.071	-0.039	-0.067	-0.133	0.3	-0.016	-0.176	-0.33	-0.348	0.15		0	0.0006	0.275		-0.039	0.0264	0.169746		-0.176	-0.144	0.212165		At1g55190	prenylated rab acceptor (PRA1) family protein contains Pfam profile PF03208: Prenylated rab acceptor (PRA1)
A001679_01	At1g55330	0.306	-0.341	0	-0.191	0.216	0.148	0.339	-0.309	0.066	-0.351	-0.4	-0.614	-0.704	0.231	-0.742		0	-0.002	0.270663		0.066	-0.0214	0.298987		-0.614	-0.4458	0.400889		At1g55330	arabinogalactan-protein (AGP21)
A001680_01	At1g70280	0.208	-0.024	-0.033	0	0.187	0.285	0.365	-0.045	-0.494	-0.755	0.09	0.243	-0.276	-0.236	0.038		0	0.0676	0.119425		-0.045	-0.1288	0.486721		0.038	-0.0282	0.221635		At1g70280	NHL repeat-containing protein contains Pfam profile PF01436: NHL repeat
A001681_01	At1g68920	-0.103	-0.083	0.235		0.083	-0.038	0.121	-0.054	-0.095	0.176	0.1	0.068	0.106	0.047	0.241		0	0.033	0.158384		-0.038	0.022	0.118935		0.1	0.1124	0.0757978		At1g68920	basic helix-loop-helix (bHLH) family protein contains Pfam profile: PF00010 helix-loop-helix DNA-binding domain
A001690_01	At1g63110	-0.002	0.008	-0.488	0	0.105	0.057	0.2	0.129	-0.13	-0.757	-0.002	0.077	-0.067	-0.027	0.015		0	-0.0754	0.234953		0.057	-0.1002	0.387182		-0.002	-0.0008	0.0533217		At1g63110	cell division cycle protein-related contains 9 transmembrane domains; similar to PIG-U (GI:27372215) [Rattus norvegicus]; similar to Cell division cycle protein 91-like 1 (CDC91-like 1 protein) (PIG-U) (Swiss-Prot:Q9H490) [Homo sapiens]
A001692_01	At1g77750	0.238	-0.044	0.072	0	-0.113	0.625	0.56	0.104	0.07	0.783	0.28	-0.081	-0.089	-0.047	0.513		0	0.0306	0.134025		0.56	0.4284	0.322257		-0.047	0.1152	0.270141		At1g77750	30S ribosomal protein S13, chloroplast, putative similar to putative 30S ribosomal protein S13, chloroplast precursor GB:P42732 [Arabidopsis thaliana]
A001693_01	At1g61010	-0.071	0	0.102	0.122	-0.422	0.168	0.113	0.027	-0.152	-0.505	0.382	0.387	0.31	0.189	0.145		0	-0.0538	0.220194		0.027	-0.0698	0.271795		0.31	0.2826	0.110934		At1g61010	cleavage and polyadenylation specificity factor, putative similar to cleavage and polyadenylation specificity factor 73 kDa subunit [Homo sapiens] SWISS-PROT:Q9UKF6
A001695_01	At1g77480	0.105	0.21	-0.41	0	-0.003	0.089	0.294	0.367	-0.036	-0.505	0.555	0.517	0.61	0.67	0.412		0	-0.0196	0.23522		0.089	0.0418	0.345192		0.555	0.5528	0.0976202		At1g77480	nucellin protein, putative similar to nucellin GB:AAB96882 GI:2290202 [Hordeum vulgare] (nucellin: similar to aspartic protease and its specific expression in nucellar cells during degeneration)
A001697_01	At1g77450	0.014	-0.003	-0.173	0.247	0	0.16	-0.236	0.542	0.96	1.171	0.424	0.043	0.214	0.288	0.645		0	0.017	0.149748		0.542	0.5194	0.574243		0.288	0.3228	0.2266		At1g77450	no apical meristem (NAM) family protein contains Pfam PF02365: No apical meristem (NAM) domain; similar to GRAB1 protein GB:CAA09371, a novel member of the NAC domain family
A001699_01	At1g64390	0.173	0	-0.129	0.517	-0.568	-0.693	-0.536	-0.87	-0.778	-1.581	-1.182	-1.63	-1.34	-0.903	-2.053		0	-0.0014	0.398896		-0.778	-0.8916	0.404517		-1.34	-1.4216	0.440201		At1g64390	endo-1,4-beta-glucanase, putative / cellulase, putative similar to endo-beta-1,4-glucanase GI:4972236 from [Fragaria x ananassa] (Plant Mol. Biol. 40, 323-332 (1999))
A001703_01	At1g29520	0.398	-0.111	-0.321	0	0.62	0.105	-0.428	-0.448	-0.215	-0.012	-0.727	-0.76	-1.23	-0.927	-0.536		0	0.1172	0.38389		-0.215	-0.1996	0.246009		-0.76	-0.836	0.260372		At1g29520	AWPM-19-like membrane family protein contains Pfam profile: PF05512 AWPM-19-like family
A001711_01	At1g77440	0.035	0	0.544	-0.139	0	0.336	0.187	0.097	0.402	0.526	0.026	0.091	0.259	0.06	0.12		0	0.088	0.263516		0.336	0.3096	0.170509		0.091	0.1112	0.0897368		At1g77440	20S proteasome beta subunit C (PBC2) identical to residues 14-204 of 20S proteasome beta subunit PBC2 GB:AAC32069 [Arabidopsis thaliana]
A001715_01	At1g72240	-0.247	0	-0.228	0.001	0.274	0.767	0.874	0.946	1.228	1.64	0.055	-0.011	0.042	-0.215	-0.426		0	-0.04	0.212173		0.946	1.091	0.351162		-0.011	-0.111	0.206764		At1g72240	expressed protein
A001717_01	At1g77290	0	-0.02	0.104	-0.002	0.252	0.139	0.181	0.059	-0.178	0.308	0.048	0.205	-0.137	0.001	0.067		0	0.0668	0.114469		0.139	0.1018	0.180482		0.048	0.0368	0.123305		At1g77290	tetrachloro-p-hydroquinone reductive dehalogenase-related contains similarity to tetrachloro-p-hydroquinone reductive dehalogenase GI:148689 from [Flavobacterium sp.]
A001728_01	At1g73730	-0.051	0	0.495	0.189	-0.161	-0.078	-0.319	-0.198	-0.126	0.188	-0.322	-0.046	-0.115	-0.147	0.03		0	0.0944	0.25725		-0.126	-0.1066	0.18805		-0.115	-0.12	0.131847		At1g73730	ethylene-insensitive3-like3 (EIL3) identical to ethylene-insensitive3-like3 (EIL3) GB:AF004215 [Arabidopsis thaliana] (Cell 89 (7), 1133-1144 (1997))
A001732_01	At1g54650	0.13	0	0.032	-0.375	-0.162	-0.004	0.136	0.39	0.268	0.085	0.039	0.11	0.092	0.196	0.132		0	-0.075	0.197907		0.136	0.175	0.155351		0.11	0.1138	0.0573864		At1g54650	expressed protein similar to Actin-binding protein ABP140 (Swiss-Prot:Q08641) [Saccharomyces cerevisiae]
A001736_01	At1g53670	0.049	0	-0.18	-0.163	0.071	-0.344	-0.369	-0.19	-0.205	-0.957	-0.457	-0.475	-0.397	-0.435	-0.278		0	-0.0446	0.118812		-0.344	-0.413	0.314494		-0.435	-0.4084	0.0784844		At1g53670	transcription factor-related similar to pilin-like transcription factor [Homo sapiens] GI:5059062; contains Pfam profile PF01641: SelR domain
A001739_01	At1g73720	0.108	0.069		-0.157	-0.069	-0.059	0.017	0.015	-0.039	-0.737	0.311	0.192	0.27	0.279	0.244		0	-0.01225	0.122794		-0.039	-0.1606	0.32393		0.27	0.2592	0.04455		At1g73720	transducin family protein / WD-40 repeat family protein contains 5 WD-40 repeats (PF00400); similar to Will die slowly protein (SP:Q9V3J8)[Drosophila melanogaster]
A001740_01	At1g73655	-0.047	0	0.414	-0.168	0.153	-0.351	-0.185	0.084	-0.082	0.08	-0.586	-0.639	-0.243	-0.263	-0.506		0	0.0704	0.223862		-0.082	-0.0908	0.18465		-0.506	-0.4474	0.183805		At1g73655	immunophilin / FKBP-type peptidyl-prolyl cis-trans isomerase family protein similar to (Peptidyl-prolyl cis-trans isomerase) (PPiase) (Rotamase) (SP:Q26486) [Spodoptera frugiperda]; contains Pfam PF00254: peptidyl-prolyl cis-trans isomerase, FKBP-type
A001741_01	At1g73840	0	-0.352	-0.65	0.261	0.661	-0.383	-0.468	-0.254	-0.43	-0.035	-0.417	-0.812	-0.577	-0.762	0.073		0	-0.016	0.512388		-0.383	-0.314	0.175623		-0.577	-0.499	0.356065		At1g73840	hydroxyproline-rich glycoprotein family protein similar to proline-rich protein precursor GB:AAC34889 [Glycine max]
A001745_01	At1g78210	0.036	0.092	-0.144	-0.063	0	0.08	0.057	-0.211	0.395	-0.539	-0.459	-0.525	-0.887	-0.625	-0.787		0	-0.0158	0.0911274		0.057	-0.0436	0.350432		-0.625	-0.6566	0.178502		At1g78210	hydrolase, alpha/beta fold family protein low similarity to hydrolases from Rhodococcus sp. EtbD2 GI:3273241, EtbD1 GI:3273239; contains Pfam profile PF00561: hydrolase, alpha/beta fold family
A001748_01	At1g03280	0	0.147	-0.323	0.203	0	-0.012	0.012	0.188	0.119	-0.94	0.059	0.152	0.142	0.18	0.009		0	0.0054	0.204329		0.012	-0.1266	0.461859		0.142	0.1084	0.0715493		At1g03280	transcription initiation factor IIE (TFIIE) alpha subunit family protein / general transcription factor TFIIE family protein contains Pfam profile: PF02002 TFIIE alpha subunit
A001749_01	At3g49400	-0.189	0.376	0.042	-0.042		1.505	2.099	2.199	1.307	1.781	1.754	1.984	1.823	1.711	1.995		0	0.04675	0.239362		1.781	1.7782	0.379691		1.823	1.8534	0.130565		At3g49400	transducin family protein / WD-40 repeat family protein contains 4 WD-40 repeats (PF00400); low similarity (47%) to Agamous-like MADS box protein AGL5 (SP:P29385) {Arabidopsis thaliana}
A001750_01	At1g36380	-0.015	0	0.331	-0.053	0.191	-0.034	-0.028	-0.016	-0.245	0.226	0.029	0.057	-0.158	-0.099	0.08		0	0.0908	0.164205		-0.028	-0.0194	0.166895		0.029	-0.0182	0.104402		At1g36380	expressed protein similar to vanilloid receptor-like protein GB:AAD26363 from [Homo sapiens]
A001752_01	At1g36390	0.678	-0.259	-0.581	1.669	0	1.649	2.023	1.691	2.434	2.173	2.17	1.499	2.11	1.818	2.172		0	0.3014	0.893823		2.023	1.994	0.330649		2.11	1.9538	0.293273		At1g36390	co-chaperone grpE family protein similar to co-chaperone CGE1 precursor isoform b [Chlamydomonas reinhardtii] GI:15384279; contains Pfam profile PF01025: co-chaperone GrpE
A001756_01	At1g78810	0.071	-0.071	0.499	-0.097		-0.199	-0.076	-0.107	-0.237		-0.566	-0.159	-0.402	-0.14	-0.717		0	0.1005	0.275736		-0.153	-0.15475	0.0757292		-0.402	-0.3968	0.251833		At1g78810	expressed protein
A001757_01	At1g71950	-0.063	0.152	0.262	0	-0.04	0.364	0.349	0.629	0.742	0.875	0.359	0.335	0.748	0.558	0.599		0	0.0622	0.139618		0.629	0.5918	0.231836		0.558	0.5198	0.173071		At1g71950	expressed protein similar to Pi starvation-induced protein GB:BAA06151 from [Nicotiana tabacum]
A001758_01	At1g53000	0	0.076	0.129	-0.22	-0.005	0.339	0.443	0.365	-0.035	-0.653	0.279	0.508	-0.026	0.112	0.133		0	-0.004	0.133006		0.339	0.0918	0.455492		0.133	0.2012	0.202736		At1g53000	cytidylyltransferase family contains Pfam profile: PF02348 cytidylyltransferase
A001760_01	At1g52930	0.04	0	0.091	-0.602	-0.604	0.772	0.689	0.055	0.194	-0.515	1.041	1.055	0.768	0.808	0.975		0	-0.215	0.35566		0.194	0.239	0.522251		0.975	0.9294	0.13332		At1g52930	brix domain-containing protein contains Pfam domain, PF04427: Brix domain
A001762_01	At1g52780	0.138	0	-0.159	0.317	-0.286	0.147	0.045	0.086	0.516	-0.044	-0.128	0.467	-0.147	-0.023	-0.037		0	0.002	0.238007		0.086	0.15	0.216057		-0.037	0.0264	0.252238		At1g52780	expressed protein
A001765_01	At1g74450	0.238	-0.046	-0.703	0.497	0	1.384	0.894	1.328	1.271	1.531	1.769	0.654	1.304	0.431	0.216		0	-0.0028	0.447196		1.328	1.2816	0.237268		0.654	0.8748	0.64489		At1g74450	expressed protein
A001766_01	At1g68490	0	0.36	-0.325	-0.108	0.197	-0.061	-0.223	-0.236	-0.419	-0.543	-0.175	0.074	-0.059	0.008	0.223		0	0.0248	0.265811		-0.236	-0.2964	0.187277		0.008	0.0142	0.148633		At1g68490	expressed protein
A001767_01	At1g63670	-0.012	0.042	0.499	0	-1.691	-0.8	0.066	0.005	-0.307	0.003	-0.648	0.082	0.182	0.091	-1.163		0	-0.2324	0.842666		0.003	-0.2066	0.362361		0.082	-0.2912	0.590892		At1g63670	expressed protein
A001770_01	At1g08810	0	0.213	0.678	-0.11	-0.383	-0.614	-0.537	0.198	-0.211	-0.245	-0.83	-0.654	0.013	-0.285	-0.866		0	0.0796	0.397543		-0.245	-0.2818	0.320959		-0.654	-0.5244	0.37848		At1g08810	myb family transcription factor (MYB60)
A001773_01	At1g70530	-0.086	-0.373	0.052	0.026	0	0.069	0.12	0.241	0.461	0.658	0.024	0.094	0.015	0.056	0.305		0	-0.0762	0.173834		0.241	0.3098	0.246397		0.056	0.0988	0.119364		At1g70530	protein kinase family protein contains Pfam domain, PF00069: Protein kinase domain
A001779_01	At1g73940	-0.006	0.148	-0.121	0.116	0	0.591	0.521	0.056	-0.013	-0.512	0.72	0.514	0.32	0.338	0.901		0	0.0274	0.107568		0.056	0.1286	0.448186		0.514	0.5586	0.250435		At1g73940	expressed protein
A001784_01	At1g73870	0.029	-0.147	-0.394	0.591	0	-0.893	-0.809	-1.089	-0.969	-0.346	-1.071	-0.775	-1.029	-0.619	-0.506		0	0.0158	0.362532		-0.893	-0.8212	0.284904		-0.775	-0.8	0.247843		At1g73870	zinc finger (B-box type) family protein
A001787_01	At1g69730	-0.125	0.023	0.563	-0.038	0	0.015	-0.009	0.165	0.525	1.583	-0.138	0.433	0.141	0.324	0.37		0	0.0846	0.273304		0.165	0.4558	0.665259		0.324	0.226	0.230711		At1g69730	protein kinase family protein contains Pfam profile: PF00069 Eukaryotic protein kinase domain
A001790_01	At1g64970	-0.036	0	0.323	0.188	-0.035	-0.387	-0.781	-0.856	-0.39	-0.741	-0.727	-0.598	-0.677	-0.689	-0.799		0	0.088	0.160837		-0.741	-0.631	0.22519		-0.689	-0.698	0.0734234		At1g64970	expressed protein
A001791_01	At1g69800	0	0.118	-0.749	0.18	-0.03	-0.259	-0.263	-0.334	-0.948	-1.178	0.106	0.123	-0.136	0.057	-0.114		0	-0.0962	0.374818		-0.334	-0.5964	0.434663		0.057	0.0072	0.123336		At1g69800	CBS domain-containing protein low similarity to SP|Q9UGI9 5'-AMP-activated protein kinase, gamma-3 subunit (AMPK gamma-3 chain) (AMPK gamma3) {Homo sapiens}; contains Pfam profile PF00571: CBS domain
A001792_01	At1g20050	0.066	0	-0.377	-0.083	0.189	-0.093	-0.132	-0.037	0.001	-0.496	0	0.01	-0.169	-0.097	0.254		0	-0.041	0.212538		-0.093	-0.1514	0.199279		0	-0.0004	0.160145		At1g20050	C-8,7 sterol isomerase identical to C-8,7 sterol isomerase GI:11279073 from [Arabidopsis thaliana] (Plant Mol. Biol. 38 (5), 807-815 (1998))
A001795_01	At1g72440	0.151	0	0.354	-0.329	-1.101	-0.491	-0.458	-0.832	-0.171	0.096	-0.405	-0.742	-0.612	-0.009	-0.398		0	-0.185	0.569525		-0.458	-0.3712	0.35092		-0.405	-0.4332	0.278077		At1g72440	CCAAT-box-binding transcription factor-related similar to CCAAT-box-binding transcription factor (CCAAT-binding factor) (CBF) (Swiss-Prot:Q03701) [Homo sapiens], GB:P53569 [Mus musculus]
A001801_01	At1g68190	0	-0.019	0.377	-0.051	0.125	-0.319	-0.165	-0.301	-0.836	-0.407	-0.431	-0.171	-0.466	-0.387	-0.023		0	0.0864	0.175635		-0.319	-0.4056	0.255722		-0.387	-0.2956	0.190761		At1g68190	zinc finger (B-box type) family protein
A001803_01	At1g68160	0.499	0.705	-0.004	0	-0.22	0.641	0.531	0.693	0.612	-1.558	0.41	0.682	0.69	0.862	0.019		0	0.196	0.38806		0.612	0.1838	0.97546		0.682	0.5326	0.329551		At1g68160	expressed protein
A001804_01	At1g51510	-0.01	0.016	0.319	0	-0.136	0.332	0.31	0.207	0.239	0.503	0.158	0.202	0.296	0.402	0.217		0	0.0378	0.168426		0.31	0.3182	0.115159		0.217	0.255	0.0961145		At1g51510	RNA-binding protein, putative similar to RNA-binding protein 8 (Ribonucleoprotein RBM8) SP:Q9Y5S9 from [Homo sapiens], RNA-binding protein Y14 [Xenopus laevis] GI:11034807; contains InterPro entry IPR000504: RNA-binding region RNP-1 (RNA recognition motif
A001805_01	At1g51580	-0.005	0	-0.106	0.299	0.284	-0.211	-0.102	-0.027	-0.459		-0.264	-0.268	-0.167	-0.043	-0.217		0	0.0944	0.184906		-0.156	-0.19975	0.188622		-0.217	-0.1918	0.0927507		At1g51580	KH domain-containing protein
A001806_01	At1g51540	0.17	0	-0.137	0.071	-0.174	0.427	0.202	0.239	0.489	-0.101	0.385	0.342	0.198	0.267	0.276		0	-0.014	0.143183		0.239	0.2512	0.231338		0.276	0.2936	0.0722032		At1g51540	kelch repeat-containing protein contains Pfam profile PF01344: Kelch motif
A001814_01	At1g69500	-3.342	0	2.063			2.03	0.539	-2.962	-2.845	-2.2	-1.831	-2.088	-1.382	-1.314	-1.167		0	-0.426333	2.7276		-2.2	-1.0876	2.24747		-1.382	-1.5564	0.386914		At1g69500	cytochrome P450 family protein similar to Cytochrome P450 86A2 (SP:O23066) [Arabidopsis thaliana]contains Pfam profile: PF00067: Cytochrome P450
A001819_01	At1g26940	0	0.014	0.205	-0.416	-0.296	-0.046	-0.243	-0.076	0.041	0.229	-0.304	-0.323	-0.353	-0.262	-0.508		0	-0.0986	0.252133		-0.046	-0.019	0.172669		-0.323	-0.35	0.0942894		At1g26940	peptidyl-prolyl cis-trans isomerase cyclophilin-type family protein contains Pfam domain, PF00160: peptidyl-prolyl cis-trans isomerase, cyclophilin-type
A001822_01	At1g09320	-0.145	0.116	0	0.138	-0.006	0.185	0.228	0.215	0.152	-0.015	0.182	0.423	0.201	-0.062	0.185		0	0.0206	0.113401		0.185	0.153	0.0983844		0.185	0.1858	0.171694		At1g09320	agenet domain-containing protein contains Pfam PF05641: Agenet domain
A001826_01	At1g17130	-0.109	-0.248	0.039	0.069	0	-0.228	-0.183	-0.096	-0.155	0.367	-0.281	-0.18	-0.322	-0.503	-0.127		0	-0.0498	0.129679		-0.155	-0.059	0.242898		-0.281	-0.2826	0.145662		At1g17130	cell cycle control protein-related contains similarity to Swiss-Prot:Q9P7C5 cell cycle control protein cwf16 [Schizosaccharomyces pombe]
A001827_01	At1g17050	0	0.012	-0.378	0.002	-0.451	-1.322	-1.435	-1.193	-1.115	-2.67	-1.219	-1.15	-0.903	-0.833	-1.509		0	-0.163	0.231078		-1.322	-1.547	0.639578		-1.15	-1.1228	0.269926		At1g17050	geranyl diphosphate synthase, putative / GPPS, putative / dimethylallyltransferase, putative / prenyl transferase, putative similar to GI:11322965; Except for first 55 amino acids, 52% identical to Prenyl transferase (Cyanophora paradoxa) (gi 99282). Loca
A001833_01	At1g04340	0.119	0	-0.521	-0.048	0.217	0.204	0.163	-0.045	-0.02	-0.253	-0.002	0.024	-0.148	0.062	0.116		0	-0.0466	0.284665		-0.02	0.0098	0.183125		0.024	0.0104	0.0990495		At1g04340	lesion inducing protein-related similar to ORF, able to induce HR-like lesions [Nicotiana tabacum]
A001838_01	At1g04950	0	0.2	0.898	-0.018	-0.061	0.147	-0.086	-0.139	-0.236	0.317	-0.079	0.027	0.056	0.249	-0.095		0	0.2038	0.400867		-0.086	0.0006	0.226113		0.027	0.0316	0.137967		At1g04950	TATA box-binding protein-associated factor (TAF) family protein contains Pfam profile: PF02969 TATA box binding protein associated factor
A001848_01	At1g55520	0	0.121	0.354	-0.188	-0.28	-0.231	-0.143	-0.21	-0.104	-0.215	-0.31	-0.354	-0.206	-0.065	-0.584		0	0.0014	0.251839		-0.21	-0.1806	0.0544729		-0.31	-0.3038	0.192133		At1g55520	transcription initiation factor IID-2 (TFIID-2) / TATA-box factor 2 / TATA sequence-binding protein 2 (TBP2) identical to Swiss-Prot:P28148|TF22_ARATH Transcription initiation factor TFIID-2 (TATA-box factor 2) (TATA sequence-binding protein 2) (TBP-2) [A
A001851_01	At1g67170	0	-0.005	0.185			-0.129	-0.38	-0.102	0.056	0.391	-0.239	-0.076	-0.14	-0.31	0.322		0	0.06	0.108282		-0.102	-0.0328	0.283762		-0.14	-0.0886	0.246491		At1g67170	expressed protein similar to enterophilin-2L (GI:12718845) [Cavia porcellus]; similar to Hyaluronan mediated motility receptor (Intracellular hyaluronic acid binding protein) (Receptor for hyaluronan-mediated motility) (CD168 antigen) (Swiss-Prot:O75330)
A001854_01	At1g22540	0.04	0	-0.559	0.166	-0.035	-0.065	-0.473	-0.172	-0.176		-0.454	-0.409	-0.281	-0.215	-0.125		0	-0.0776	0.279622		-0.174	-0.2215	0.175371		-0.281	-0.2968	0.135791		At1g22540	proton-dependent oligopeptide transport (POT) family protein contains Pfam profile: PF00854 POT family
A001859_01	At1g78590	0.081	0	-0.241	-0.339	0.325	0.179	0.254	-0.1	0.107	0.186	0.02	0.055	0.002	-0.083	0.028		0	-0.0348	0.264165		0.179	0.1252	0.136223		0.02	0.0044	0.0524528		At1g78590	ATP-NAD kinase family protein contains Pfam domain, PF01513: ATP-NAD kinase
A001861_01	At1g78510	0	0.01	-0.566	0.097	-0.267	-0.694	-0.561	-0.599	-0.749	-2.374	-0.675	-0.188	-0.389	-0.228	-0.673		0	-0.1452	0.271909		-0.694	-0.9954	0.774262		-0.389	-0.4306	0.234585		At1g78510	solanesyl diphosphate synthase (SPS) identical to solanesyl diphosphate synthase [Arabidopsis thaliana] GI:19911233; contains Pfam profile PF00348: Polyprenyl synthetase
A001864_01	At1g49380	0.34	-0.074	0.231	0	-0.007	-0.476	-0.342	-0.451	-0.642	-0.94	-0.689	-0.519	-0.432	-0.582	-0.747		0	0.098	0.17781		-0.476	-0.5702	0.232951		-0.582	-0.5938	0.126932		At1g49380	cytochrome c biogenesis protein family contains Pfam PF05140: ResB-like family; similar to CCS1 (GI:2749939) [Chlamydomonas reinhardtii]; similar to Ccs1 (GI:6137102) [Synechococcus sp. PCC 6301]
A001867_01	At1g49360	-0.042	0.129	0.039	0	-0.233	0.187	0.468	0.32	0.308	0.571	0.429	0.763	0.417	0.448	0.601		0	-0.0214	0.134094		0.32	0.3708	0.149862		0.448	0.5316	0.149174		At1g49360	F-box family protein contains Pfam PF00646: F-box domain
A001868_01	At1g54140	-0.029	0	0.279	-0.004	0.012	0.306	0.083	0.013	0.35	0.187	0.205	0.122	0.21	-0.213	0.709		0	0.0516	0.127993		0.187	0.1878	0.14302		0.205	0.2066	0.330016		At1g54140	transcription initiation factor IID (TFIID) 31 kDa subunit (TAFII-31) family protein contains Pfam profile: PF02291 transcription initiation factor IID, 31kD subunit
A001870_01	At1g73180	0	0.061	-0.002	0.198	-0.018	0.267	0.36	0.125	0.224	-0.169	0.466	0.623	0.362	0.567	0.42		0	0.0478	0.0892031		0.224	0.1614	0.203102		0.466	0.4876	0.106594		At1g73180	eukaryotic translation initiation factor-related similar to eukaryotic translation initiation factor 2A (GI:21956484) [Homo sapiens]; similar to Eukaryotic translation initiation factor 3 subunit 9 (eIF-3 eta) (eIF3 p116) (eIF3 p110) (eIF3b) (Swiss-Prot:P
A001874_01	At1g72680	0.15	0.178	-0.797	-0.279	0	0.357	0.023	0.217	0.378	-1.007	0.999	0.992	0.574	0.792	1		0	-0.1496	0.404763		0.217	-0.0064	0.577017		0.992	0.8714	0.188491		At1g72680	cinnamyl-alcohol dehydrogenase, putative similar to cinnamyl-alcohol dehydrogenase GB:AAC35846 [Medicago sativa], SP|Q08350 [Picea abies]
A001880_01	At1g76600	0	-0.213	-0.471	0.242	0.372	1.294	0.623	1.852	1.791	3.122	1.291	0.219	1.282	0.494	0.962		0	-0.014	0.340286		1.791	1.7364	0.918097		0.962	0.8496	0.479204		At1g76600	expressed protein
A001882_01	At1g11780	0.434	0.329	0	-0.283	-0.429	0.214	0.39	0.113	0.053	-0.452	0.106	0.391	0.222	0.222	-0.265		0	0.0102	0.374235		0.113	0.0636	0.315259		0.222	0.1352	0.245721		At1g11780	oxidoreductase, 2OG-Fe(II) oxygenase family protein low similarity to alkB proteins from Homo sapiens [SP|Q13686], Caulobacter crescentus [GI:2055386]; contains Pfam profile PF03171: oxidoreductase, 2OG-Fe(II) oxygenase family
A001883_01	At1g51730	0	0.332	0.985	-0.133	-0.121	0.384	0.338	0.111	0.204	0.334	0.369	0.394	0.629	0.667	0.312		0	0.2126	0.470846		0.334	0.2742	0.113209		0.394	0.4742	0.161974		At1g51730	RWD domain-containing protein contains Pfam profile PF05773: RWD domain; similar to GCN2 eIF2alpha kinase (GI:6066585) [Mus musculus]; similar to GCN2beta (GI:10764163) [Mus musculus]; similar to RING finger protein 25 (RING finger protein AO7) (Swiss-Pro
A001884_01	At1g11760	-0.117	0	-0.02	0.118	0.088	0.314	0.232	-0.058	-0.22	0.177	0.246	0.358	0.023	0.054	0.455		0	0.0138	0.0932802		0.177	0.089	0.221307		0.246	0.2272	0.187784		At1g11760	expressed protein weak similarity to Pfam PF01648: 4'-phosphopantetheinyl transferase superfamily
A001886_01	At1g11720	0.039	-0.217	0.406	0	-0.043	-0.672	-0.658	-0.765	-0.653	-0.147	-0.845	-0.844	-0.551	-0.802	-0.7		0	0.037	0.228282		-0.658	-0.579	0.245757		-0.802	-0.7484	0.125153		At1g11720	starch synthase, putative strong similarity to soluble-starch-synthase [Solanum tuberosum] GI:1911166
A001889_01	At1g11660	-0.196	0.033	0.494	0	-0.247	-0.06	-0.216	-0.085	-0.105	0.378	-0.429	-0.448	-0.241	-0.245	-0.381		0	0.0168	0.29289		-0.085	-0.0176	0.229042		-0.381	-0.3488	0.0996303		At1g11660	heat shock protein, putative strong similarity to gb|Z70314 heat-shock protein from Arabidopsis thaliana and is a member of the PF|00012 Hsp70 protein family
A001891_01	At1g64500	0	-0.094	-2.013	0.148	0.172	-1.06	-0.679	-0.371	-1.101	-1.845	-0.223	-0.2	-0.559	-0.528	-0.22		0	-0.3574	0.931909		-1.06	-1.0112	0.553598		-0.223	-0.346	0.180841		At1g64500	glutaredoxin family protein
A001894_01	At1g20960	0	-0.03	0.361	0.44	-0.206	0.189	0.171	0.228	0.097	-0.484	0.527	0.388	0.161	0.469	0.912		0	0.113	0.275414		0.171	0.0402	0.296872		0.469	0.4914	0.273189		At1g20960	U5 small nuclear ribonucleoprotein helicase, putative similar to SP|O75643 U5 small nuclear ribonucleoprotein 200 kDa helicase {Homo sapiens}; contains Pfam profiles PF00270: DEAD/DEAH box helicase, PF00271: Helicase conserved C-terminal domain, PF02889:
A001895_01	At1g58420	-0.068	0.033	-0.01	0.159	0	1.292	0.72	1.525	1.854	2.294	0.645	0.518	1.031	0.462	0.376		0	0.0228	0.084402		1.525	1.537	0.591861		0.518	0.6064	0.256674		At1g58420	expressed protein
A001896_01	At1g31730	0.101	-0.103	-0.069	0.182	0	0.102	0.011	0.018	-0.013	-0.793	0.075	0.256	0.006	-0.142	0.301		0	0.0222	0.118565		0.011	-0.135	0.370386		0.075	0.0992	0.18218		At1g31730	epsilon-adaptin, putative similar to SP|Q9UPM8 Adapter-related protein complex 4 epsilon 1 subunit (Epsilon subunit of AP-4) (AP-4 adapter complex epsilon subunit) {Homo sapiens}; contains Pfam profile: PF01602 Adaptin N terminal region
A001898_01	At1g63690	0.075	0.28	-0.76	0	-0.747	-0.546	0.103	-0.092	-0.17	-0.96	-0.886	-0.141	-0.316	-0.101	-1.139		0	-0.2304	0.488419		-0.17	-0.333	0.422269		-0.316	-0.5166	0.468476		At1g63690	protease-associated (PA) domain-containing protein contains protease associated (PA) domain, Pfam:PF02225
A001901_01	At1g05720	0	-0.033	0.042	-0.167	0.031	0.402	0.36	0.433	0.214	0.33	0.339	0.423	0.315	0.196	0.452		0	-0.0254	0.0843759		0.36	0.3478	0.0845056		0.339	0.345	0.100834		At1g05720	selenoprotein family protein contains Prosite PS00190: Cytochrome c family heme-binding site signature; similar to 15 kDa selenoprotein (GI:12314088) {Homo sapiens}
A001904_01	At1g51160	-0.006	0	0.43	-0.127	0.181	0.288	0.263	0.27	0.117	0.503	0.395	0.425	0.289	0.289	0.702		0	0.0956	0.216869		0.27	0.2882	0.138216		0.395	0.42	0.169186		At1g51160	synbindin, putative similar to Swiss-Prot:Q9ES56 synbindin (TRS23 homolog) [Mus musculus]
A001905_01	At1g51370		-0.183	0.687	-0.156	0.156	-0.182	-0.113	-0.055	-0.083	0.515	-0.215	0.024	-0.088	-0.163	-0.09		0	0.126	0.404403		-0.083	0.0164	0.282704		-0.09	-0.1064	0.0902901		At1g51370	F-box family protein contains F-box domain Pfam:PF00646
A001907_01	At1g51170	-0.065	0.171	-0.389	0	0.09	-0.222	-0.583	-0.083	-0.182	0.164	-1.206	-0.698	-1.025	-1.094	-0.899		0	-0.0386	0.215312		-0.182	-0.1812	0.270146		-1.025	-0.9844	0.194991		At1g51170	protein kinase family protein
A001910_01	At1g51200	-0.115	0.106	-0.418	0	0.032	-0.029	-0.026	0.024	-0.147	-0.825	0.409	0.123	-0.078	-0.01	0.238		0	-0.079	0.20555		-0.029	-0.2006	0.354657		0.123	0.1364	0.195073		At1g51200	zinc finger (AN1-like) family protein contains Pfam domains, PF01428: AN1-like Zinc finger and PF01754: A20-like zinc finger
A001912_01	At1g79510	0	-0.172	-0.676	0.102	0.301	-0.548	-0.523	-0.274	-0.443	-0.952	-0.295	-0.18	-0.395	-0.559	-0.044		0	-0.089	0.370122		-0.523	-0.548	0.249971		-0.295	-0.2946	0.197434		At1g79510	expressed protein
A001913_01	At1g55020	0	-0.188	-0.077	0.639	0.41	-1.49	-1.44	-1.726	-0.814	-1.327	-1.82	-1.661	-2.03	-1.731	-1.599		0	0.1568	0.351697		-1.44	-1.3594	0.337809		-1.731	-1.7682	0.167874		At1g55020	lipoxygenase (LOX1) identical to SP|Q06327
A001914_01	At1g50940	0	0.326	-0.197	-0.006	0.244	-0.207	-0.113	0.154	0.308	-0.552	0.05	0.337	0.101	0.228	0.298		0	0.0734	0.210784		-0.113	-0.082	0.333647		0.228	0.2028	0.123914		At1g50940	electron transfer flavoprotein alpha subunit family protein contains Pfam profile: PF00766 electron transfer flavoprotein, alpha subunit
A001915_01	At1g26630	0	-0.147	-0.774	0.072	0.082	0.304	0.193	0.035	-0.006	-0.448	0.187	0.2	-0.029	-0.032	0.609		0	-0.1534	0.358795		0.035	0.0156	0.287408		0.187	0.187	0.261185		At1g26630	eukaryotic translation initiation factor 5A, putative / eIF-5A, putative strong similariy to SP|Q9AXQ6 Eukaryotic translation initiation factor 5A-1 (eIF-5A 1) {Lycopersicon esculentum}
A001918_01	At1g51720	0	0.162	-0.357	0.075	-0.232	-0.09	-0.07	0.033	-0.016	-0.869	-0.05	0.027	0.047	0.15	-0.391		0	-0.0704	0.217003		-0.07	-0.2024	0.375725		0.027	-0.0434	0.207003		At1g51720	glutamate dehydrogenase, putative similar to NADP-specific glutatamate dehydrogenase (NADP-GDH) SP:P28724 [Giardia lamblia (Giardia intestinalis)]
A001919_01	At1g06900	0	-0.122	0.527	0.364	-0.316	0.166	0.291	0.235	0.026		0.138	0.171	-0.027	-0.061	-0.08		0	0.0906	0.347823		0.2	0.1795	0.114393		-0.027	0.0282	0.11743		At1g06900	peptidase M16 family protein / insulinase family protein contains Pfam domain, PF05193: Peptidase M16 inactive domain; similar to insulin-degrading enzyme (Insulysin, Insulinase, Insulin protease) [Mouse] SWISS-PROT:Q9JHR7
A001920_01	At1g70330	0.023	-0.216	-0.565	0	0.14	0.089	-0.066	-0.07	-0.018	-0.019	-0.044	0.121	-0.365	-0.311	0.039		0	-0.1236	0.27822		-0.019	-0.0168	0.0641303		-0.044	-0.112	0.215246		At1g70330	equilibrative nucleoside transporter family protein contains similarity to SWISS-PROT:Q14542 equilibrative nucleoside transporter 2 (Equilibrative nitrobenzylmercaptopurine riboside-insensitive nucleoside transporter, Equilibrative NBMPR-insensitive nucle
A001924_01	At1g09230	-0.083	0.055	0.527	-0.063	0	-0.14	-0.197	-0.443	-0.466	-0.183	-0.159	-0.189	0.087	0.095	-0.441		0	0.0872	0.25179		-0.197	-0.2858	0.15564		-0.159	-0.1214	0.222703		At1g09230	RNA recognition motif (RRM)-containing protein contains INTERPRO:IPR000504 RNA-binding region RNP-1 (RNA recognition motif) domain
A001926_01	At1g69850	0.033	-0.115	-0.541	0.226	0	0.433	0.547	0.481	0.334	-0.305	0.708	0.931	0.415	0.607	0.878		0	-0.0794	0.285722		0.433	0.298	0.345912		0.708	0.7078	0.208973		At1g69850	nitrate transporter (NTL1) identical to nitrate transporter (NTL1) GI:3377517 [Arabidopsis thaliana]
A001927_01	At1g55255	-0.116	-0.052	1.115	0	0.122	-0.057	-0.321	0.152	0.281	1.067	-0.144	-0.244	0.14	0.246	-0.045		0	0.2138	0.511301		0.152	0.2244	0.523227		-0.045	-0.0094	0.201228		At1g55255	zinc finger (C3HC4-type RING finger) family protein contains Pfam profile: PF00097 zinc finger, C3HC4 type (RING finger)
A001932_01	At1g25500	-0.168	0.014	0.184		-0.014	0.182	0.017	-0.171	0.117	0.535	0.26	0.374		0.356	0.147		0	0.004	0.144231		0.117	0.136	0.25985		0.308	0.28425	0.104289		At1g25500	choline transporter-related contains weak similarity to CD92 protein [Homo sapiens] gi|16945323|emb|CAC82175
A001933_01	At1g10200	-0.013	0.199	-0.241	0	0.306	0.349	0.591	0.676	0.119	-0.808	0.618	0.466	0.626	0.767	0.83		0	0.0502	0.211475		0.349	0.1854	0.596493		0.626	0.6614	0.14221		At1g10200	transcription factor LIM, putative strong similarity to transcription factor Ntlim1 [Nicotiana tabacum] GI:5689136, LIM domain protein WLIM-1 [Helianthus annuus] GI:5070280; contains Pfam profile PF00412: LIM domain
A001934_01	At1g17745	0.261	-0.261	0.326	-1.034		-0.065	-0.639	-0.104	0.019	0.202	-0.217	0.736	0.266	0.698	0.926		0	-0.177	0.62885		-0.065	-0.1174	0.314489		0.698	0.4818	0.459229		At1g17745	D-3-phosphoglycerate dehydrogenase / 3-PGDH identical to SP|O04130
A001936_01	At1g20850	0.633	0	0.061	-0.235	-0.239	-0.327	-0.392	0.045	0.195	-0.884	-1.143	-1.048	-0.837	-0.695	-1.103		0	0.044	0.356046		-0.327	-0.2726	0.421469		-1.048	-0.9652	0.191638		At1g20850	cysteine endopeptidase, papain-type (XCP2) identical to papain-type cysteine endopeptidase XCP2 GI:6708183 from [Arabidopsis thaliana]
A001937_01	At1g22160	0.061	-0.002	0.597	0	-0.49	-0.692	-1.023	-0.588	-0.846	-1.326	-1.353	-1.445	-1.499	-1.192	-1.753		0	0.0332	0.385591		-0.846	-0.895	0.291549		-1.445	-1.4484	0.206274		At1g22160	senescence-associated protein-related similar to senescence-associated protein SAG102 (GI:22331931) [Arabidopsis thaliana]
A001939_01	At1g10370	0	-0.173	-1.156	0.096	0.028	-0.988	-1.087	-1.039	-0.276	-1.938	-2.043	-2.083	-2.1	-1.781	-1.989		0	-0.241	0.521023		-1.039	-1.0656	0.58986		-2.043	-1.9992	0.129245		At1g10370	glutathione S-transferase, putative (ERD9) similar to glutathione S-transferase TSI-1 [Aegilops tauschii] gi:2190992 gb:AAD10129; similar to ESTs gb|R29860, emb|Z29757, and emb|Z29758; identical to cDNA ERD9 mRNA for glutathione S-transferase, GI:15375407
A001941_01	At1g21380	0.02	-0.656	-0.629	0.185	0	0.281	0.247	0.092	0.359	0.339	0.521	0.424	0.001	0.081	0.576		0	-0.216	0.396018		0.281	0.2636	0.105843		0.424	0.3206	0.262504		At1g21380	VHS domain-containing protein / GAT domain-containing protein weak similarity to Hrs [Rattus norvegicus] GI:8547026; contains Pfam profiles PF00790: VHS domain, PF03127: GAT domain
A001951_01	At1g75180	0.041	0.097	-1.201	-0.312	0	-0.322	0.056	-0.084	-0.701	-2.445	-0.294	0.118	-0.291	0.182	-0.449		0	-0.275	0.541459		-0.322	-0.6992	1.01721		-0.291	-0.1468	0.279291		At1g75180	expressed protein
A001952_01	At1g04850	0	-0.014	-0.11	0.027	0.071	0.353	0.241	0.015	-0.036	-0.385	0.345	0.428	0.059	0.115	0.412		0	-0.0052	0.066953		0.015	0.0376	0.285205		0.345	0.2718	0.172687		At1g04850	ubiquitin-associated (UBA)/TS-N domain-containing protein weak similarity to SP|P45974 Ubiquitin carboxyl-terminal hydrolase 5 (EC 3.1.2.15) {Homo sapiens}; contains Pfam profile PF00627: UBA/TS-N domain
A001955_01	At1g16500	-0.089	0	-0.547	0.226	0.061	0.442	0.499	0.601	0.943	0.17	0.275	0.785	0.392	0.309	0.692		0	-0.0698	0.290502		0.499	0.531	0.280138		0.392	0.4906	0.232603		At1g16500	expressed protein
A001956_01	At1g53165		-0.022	0.036	0.022	-0.408	0.064	-0.116	0.046	0.101	-0.785	-0.092	0.124	-0.01	0.17	-0.259		0	-0.093	0.211449		0.046	-0.138	0.371104		-0.01	-0.0134	0.172499		At1g53165	protein kinase, putative similar to serine/threonine protein kinase 24 [Homo sapiens] SWISS-PROT:Q9Y6E0
A001957_01	At1g27770	0.268	-0.268	0.225	-0.129	0	0.84	0.523	1.029	1.358	0.059	0.425	-0.076	0.583	-0.149	-0.471		0	0.0192	0.228621		0.84	0.7618	0.495963		-0.076	0.0624	0.433262		At1g27770	calcium-transporting ATPase 1, plasma membrane-type / Ca(2+)-ATPase isoform 1 (ACA1) / plastid envelope ATPase 1 (PEA1) identical to SP|Q37145 Calcium-transporting ATPase 1, plasma membrane-type (EC 3.6.3.8) (Ca(2+)-ATPase isoform 1) (Plastid envelope ATP
A001958_01	At1g20780	0	-0.244	0.22	0.068	-0.061	0.276	0.278	0.384	0.761	0.902	-0.011	0.064	-0.062	-0.063	-0.041		0	-0.0034	0.170458		0.384	0.5202	0.291805		-0.041	-0.0226	0.0528138		At1g20780	armadillo/beta-catenin repeat protein-related / U-box domain-containing protein low similarity to immediate-early fungal elicitor protein CMPG1 [Petroselinum crispum] GI:14582200; contains Pfam profile PF04564: U-box domain
A001959_01	At1g04400	-0.138	0	-0.036	0.389	0.091	0.095	0.076	-0.017	-0.057	-0.181	0.191	0.148	0.084	0.279	0.379		0	0.0612	0.200758		-0.017	-0.0168	0.111455		0.191	0.2162	0.115337		At1g04400	cryptochrome 2 apoprotein (CRY2) / blue light photoreceptor (PHH1) 97% identical to photolysase (PHH1) (SP:Q96524) and cryptochrome 2 apoprotein (CRY2) (SP:U43397). ESTs gb|W43661 and gb|Z25638 come from this gene; contains Pfam profiles PF03441: FAD bind
A001961_01	At1g28380	0	-0.311	-0.492	0.019	0.172	0.227	0.013	0.387	1.05	-0.656	0.172	-0.176	0.052	-0.17	-0.23		0	-0.1224	0.271026		0.227	0.2042	0.617619		-0.17	-0.0704	0.173409		At1g28380	expressed protein
A001962_01	At1g79975	0	-0.006	0.175	-0.228	0.083	-0.041	-0.118	-0.063	-0.014	-0.024	-0.008	-0.154	0.061	0.054	0.113		0	0.0048	0.149515		-0.041	-0.052	0.0413098		0.054	0.0132	0.102853		At1g79975	expressed protein
A001963_01	At1g08770	0	0.057	-1.016	-0.001	0.082	-0.024	-0.045	0.194	0.085	0.28	0	0.075	0.012	0.117	0.151		0	-0.1756	0.471183		0.085	0.098	0.139501		0.075	0.071	0.0652955		At1g08770	prenylated rab acceptor (PRA1) family protein weak similarity to prenylated Rab acceptor 1 (PRA1) [Homo sapiens] GI:4877285; contains Pfam profile PF03208: Prenylated rab acceptor (PRA1)
A001964_01	At1g54990	0.174	0	0.464	-0.002	-0.002	0.337	0.219	-0.02	0.343	0.675	0.042	0.184	0.168	0.227	0.038		0	0.1268	0.203217		0.337	0.3108	0.251108		0.168	0.1318	0.0865459		At1g54990	expressed protein
A001965_01	At1g54390	0.215	0.161	-0.306	0	-0.03	0.199	0.19	0.131	0.046	-0.705	0.012	0.139	0.118	0.225	0.108		0	0.008	0.203937		0.131	-0.0278	0.383451		0.118	0.1204	0.0761531		At1g54390	PHD finger protein-related contains low similarity to PHD-finger domain proteins
A001966_01	At1g14000	0.032	-0.099	0.543	-0.022	0	-0.077	-0.121	-0.083	0.342	-0.093	-0.099		0.062	-0.026	0.123		0	0.0908	0.257359		-0.083	-0.0064	0.195491		0.018	0.015	0.0975534		At1g14000	protein kinase family protein / ankyrin repeat family protein contains Pfam profiles: PF00069 protein kinase domain, PF00023 ankyrin repeat
A001967_01	At1g49430	0	-0.278	-0.704	0.004	0.211	-0.337	-0.676	-1.05	-0.633	-1.764	-1.014	-1.346	-1.668	-1.203	-1.56		0	-0.1534	0.353475		-0.676	-0.892	0.549343		-1.346	-1.3582	0.264296		At1g49430	long-chain-fatty-acid--CoA ligase / long-chain acyl-CoA synthetase nearly identical to acyl CoA synthetase (MF45P) GI:1617268 from [Brassica napus]
A001970_01	At1g06570	-0.159	0.001	-1.247	0	0.097	-0.684	-0.414	-0.329	-0.657	-1.803	0.283	-0.004	-0.072	0.14	-0.007		0	-0.2616	0.558464		-0.657	-0.7774	0.593337		-0.004	0.068	0.143019		At1g06570	4-hydroxyphenylpyruvate dioxygenase (HPD) identical to 4-hydroxyphenylpyruvate dioxygenase (HPD) SP:P93836 [Arabidopsis thaliana (Mouse-ear cress)]
A001972_01	At1g71990	0	-0.082	-0.134	0.345	0.376	-0.057	0.005	0.124	-0.303	0.416	0.103	0.036	-0.335	-0.237	0.552		0	0.101	0.241907		0.005	0.037	0.262997		0.036	0.0238	0.347193		At1g71990	alpha-(1,4)-fucosyltransferase / galactoside 3(4)-L-fucosyltransferase (FUT13) (FucTC) identical to SP|Q9C8W3 Alpha-(1,4)-fucosyltransferase (EC 2.4.1.-) (FT4-M) (Galactoside 3(4)- L-fucosyltransferase) (FucTC) (AtFUT13) {Arabidopsis thaliana}; identical
A001974_01	At1g63900	0.11	0.004	-0.165	0	-0.63	-0.635	-0.046	0.124	0.13	-0.025	-0.659	0.088	-0.037	0.082	-0.78		0	-0.1362	0.29304		-0.025	-0.0904	0.315191		-0.037	-0.2612	0.423495		At1g63900	zinc finger (C3HC4-type RING finger) family protein contains Pfam profile: PF00097 zinc finger, C3HC4 type (RING finger)
A001975_01	At1g64550	0	-0.011	0.278	0.335	-0.048	0.2	0.116	-0.166	0.009	-0.274	0.315	0.293	0.132	0.338	0.367		0	0.1108	0.180659		0.009	-0.023	0.195911		0.315	0.289	0.0919592		At1g64550	ABC transporter family protein similar to ABC transporter protein GB:AAF31030 GI:6899653 from [Leishmania major]
A001976_01	At1g64280	0	0.013	-0.029	-0.06	0.164	0.182	0.06	0.14	0.47	0.022	0.302	0.479	0.238	0.063	0.275		0	0.0176	0.0865407		0.14	0.1748	0.176729		0.275	0.2714	0.148823		At1g64280	regulatory protein (NPR1) identical to regulatory protein NPR1 (nonexpresser of PR genes 1, NPR1; noninducible immunity 1, Nim1; salicylic acid insensitive 1, Sai1) [Arabidopsis thaliana] SWISS-PROT:P93002
A001977_01	At1g14210	0	0.024	0.281	-0.519	-0.832	0.447	0.53	0.436	0.015	0.305	0.478	0.511	0.163	0.428	0.348		0	-0.2092	0.453403		0.436	0.3466	0.202112		0.428	0.3856	0.138767		At1g14210	ribonuclease T2 family protein contains similarity to RNase GI:7768564 from [Nicotiana tabacum]; contains Pfam profile PF00445: Ribonuclease T2 family
A001979_01	At1g16240	-0.148	0	0.342	-0.053	0.152	0.001	0.022	0.229	0.232	0.635	0.333	0.075	0.388	0.351	0.069		0	0.0586	0.192101		0.229	0.2238	0.254727		0.333	0.2432	0.157551		At1g16240	syntaxin 51 (SYP51) identical to SP|Q9SA23 Syntaxin 51 (AtSYP51) {Arabidopsis thaliana}; supporting cDNA gi|13811643|gb|AF355755.1|AF355755
A001980_01	At1g68570	-0.267	0.126	-0.262	0.194	0	0.317	0.331	-0.168	-0.241	0.184	-0.387	0.5	-0.043	-0.072	0.655		0	-0.0418	0.214889		0.184	0.0846	0.271305		-0.043	0.1306	0.43317		At1g68570	proton-dependent oligopeptide transport (POT) family protein contains Pfam profile: PF00854 POT family
A001981_01	At1g59960	0.066	-0.035	-0.027		0.027	-0.01	0.122	0.21	0.463	0.714	0.026	0.129	-0.029	0.257	0.303		0	0.00775	0.0476051		0.21	0.2998	0.288898		0.129	0.1372	0.143088		At1g59960	aldo/keto reductase, putative similar to NADPH-dependent codeinone reductase GI:6478210 [Papaver somniferum], NAD(P)H dependent 6'-deoxychalcone synthase [Glycine max][GI:18728]
A001984_01	At1g04170	0.053	0	-0.137	0.124	-0.003	0.277	0.339	-0.052	-0.005	0.097	0.103	0.333	-0.008	-0.03	0.197		0	0.0074	0.0957721		0.097	0.1312	0.171552		0.103	0.119	0.150388		At1g04170	eukaryotic translation initiation factor 2 subunit 3, putative / eIF2S3, putative / eIF-2-gamma, putative similar to gb|U37354 from S. pombe. ESTs gb|T41979, gb|N37284 and gb|N37529 come from this gene
A001985_01	At1g34290	-0.407	0.489	0	0.032	-0.221	1.39	0.797	-0.507	-0.122	-0.849	0.518	0.495	-0.302	0.082	0.365		0	-0.0214	0.336283		-0.122	0.1418	0.929987		0.365	0.2316	0.345076		At1g34290	leucine-rich repeat family protein conatins leucine rich repeat (LRR) domains, Pfam:PF00560; contains similarity to disease resistance protein GI:3894383 from [Lycopersicon esculentum]
A001986_01	At1g07080	0	-0.136	0.215	-0.033	0.112	-0.196	-0.111	0.024	-0.108	0.159	-0.271	-0.081	-0.126	-0.188	-0.199		0	0.0316	0.135426		-0.108	-0.0464	0.139188		-0.188	-0.173	0.0727633		At1g07080	gamma interferon responsive lysosomal thiol reductase family protein / GILT family protein similar to SP|P13284 Gamma-interferon inducible lysosomal thiol reductase precursor {Homo sapiens}; contains Pfam profile PF03227: Gamma interferon inducible lysoso
A001988_01	At1g27950	0.147	-0.169	-0.873	0	0.066	-0.532	-0.224	-0.215	0.134	-1.562	-0.486	-0.749	-0.659	-0.482	-0.501		0	-0.1658	0.41207		-0.224	-0.4798	0.649266		-0.501	-0.5754	0.121837		At1g27950	lipid transfer protein-related low similarity to lipid transfer protein Picea abies GI:2627141; contains Pfam profile: PF00234: Protease inhibitor/seed storage/LTP family
A001990_01	At1g15110	0	0.019	0.336	-0.059	-0.622	0.315	0.141	0.061	0.377	0.097	0.369	0.361	0.318	0.361	0.192		0	-0.0652	0.347263		0.141	0.1982	0.139597		0.361	0.3202	0.0744157		At1g15110	phosphatidyl serine synthase family protein contains Pfam profile: PF03034 phosphatidyl serine synthase
A001996_01	At1g07790	0.151	0	-0.727	0.014	-0.1	0.124	-0.015	-0.129	-0.424	-0.976	0.042	-0.018	-0.142	-0.25	-0.332		0	-0.1324	0.344194		-0.129	-0.284	0.436267		-0.142	-0.14	0.155705		At1g07790	histone H2B, putative strong similarity to histone H2B Arabidopsis thaliana GI:2407802, Gossypium hirsutum SP|O22582, Lycopersicon esculentum GI:3021489, Capsicum annuum SP|O49118; contains Pfam profile PF00125 Core histone H2A/H2B/H3/H4
A001997_01	At1g01120	0	-0.196	-1.767	0.14	0.081	-0.806	-0.719	-0.528	-0.281	-2.268	-0.979	-1.467	-1.471	-1.325	-1.707		0	-0.3484	0.803112		-0.719	-0.9204	0.779821		-1.467	-1.3898	0.267453		At1g01120	fatty acid elongase 3-ketoacyl-CoA synthase 1 (KCS1) nearly identical to GB:AAC99312 GI:4091810 from [Arabidopsis thaliana]
A001998_01	At1g15290	0	-0.19	0.265	0.235	-0.073	-0.453	-0.753	-0.374	-0.476	-2.359	-0.438	-0.054	-0.3	-0.207	-0.062		0	0.0474	0.197259		-0.476	-0.883	0.837423		-0.207	-0.2122	0.163025		At1g15290	tetratricopeptide repeat (TPR)-containing protein ESTs gb|F20110 and gb|F20109 come from this gene; contains Pfam profile PF00515: TPR Domain
A002002_01	At1g76490	-0.153	0	-0.546	0.367	0.374	-0.138	-0.285	0.136	-0.418	-0.779	0.354	-0.036	-0.015	-0.038	0.206		0	0.0084	0.38592		-0.285	-0.2968	0.339072		-0.015	0.0942	0.177728		At1g76490	3-hydroxy-3-methylglutaryl-CoA reductase 1 / HMG-CoA reductase 1 (HMG1) identical to HMG-CoA reductase 1 [SP|P14891]
A002003_01	At1g21610	-0.144	0.046	0	0.08	-0.028	0.043	0.042	0.202	-0.129	-0.203	0.164	0.232	0.135	0.23	0.138		0	-0.0092	0.0860419		0.042	-0.009	0.159579		0.164	0.1798	0.0480853		At1g21610	wound-responsive family protein similar to wound-responsive protein 14.05 (GI:16506638) [Castanea sativa]; ESTs gb T42839 and gb|AA395192 come from this gene
A002004_01	At1g33750	0	0.084	0.814	-0.11	-0.086	0.077	0.026	0.088	0.117	0.407	-0.354	-0.209	0.098	0.147	-0.26		0	0.1404	0.384248		0.088	0.143	0.151197		-0.209	-0.1156	0.224161		At1g33750	terpene synthase/cyclase family protein similar to DELTA-CADINENE SYNTHASE ISOZYME A GB:Q43714 from [Gossypium arboreum]
A002005_01	At1g48960	0.321	0	-0.241	-0.176	0.442	-0.023	0.023	0.23	-0.023	0.232	0.056	-0.125	0.071	-0.174	-0.029		0	0.0692	0.301463		0.023	0.0878	0.132067		-0.029	-0.0402	0.108211		At1g48960	universal stress protein (USP) family protein contains Pfam PF00582: universal stress protein family; similar to hypothetical protein GI:7770340 from [Arabidopsis thaliana]
A002007_01	At1g52280	0.17	0.194	-0.143	-0.154	0	0.215	0.528	0.472	0.458	-1.22	0.03	0.184	0.144	0.418	0.09		0	0.0134	0.165683		0.458	0.0906	0.742448		0.144	0.1732	0.148597		At1g52280	Ras-related GTP-binding protein, putative similar to RAB7D GI:1370187 from [Lotus japonicus] (Plant J. 11 (2), 237-250 (1997)); contains Pfam PF00071: Ras family
A002008_01	At1g47960	-0.111	0.017	-0.155	0.078	0	-0.135	-0.062	-0.152	-0.458	0.359	0.611	0.204	0.634	0.362	0.698		0	-0.0342	0.0960089		-0.135	-0.0896	0.29312		0.611	0.5018	0.209836		At1g47960	invertase/pectin methylesterase inhibitor family protein low similarity to SP|P83326 Pectinesterase inhibitor (Pectin methylesterase inhibitor) (PMEI) {Actinidia chinensis}; contains Pfam profile PF04043: Plant invertase/pectin methylesterase inhibitor
A002009_01	At1g28140	0.088	0	0.344	-0.114	-0.283	0.135	0.316	0.294	0.25	0.272	0.197	0.326	0.457	0.617	0.009		0	0.007	0.233944		0.272	0.2534	0.0706102		0.326	0.3212	0.233911		At1g28140	expressed protein contains similarity to cytochrome oxidase I GI:1289267 from (Xantholinus sp.)
A002011_01	At1g20440	-0.06	0	-0.55	0.458	0.536	0.609	0.607	1.003	0.558	0.489	1.241	0.713	0.505	0.469	1.071		0	0.0768	0.439792		0.607	0.6532	0.20154		0.713	0.7998	0.343539		At1g20440	dehydrin (COR47) identical to dehydrin COR47 (Cold-induced COR47 protein) [Arabidopsis thaliana] SWISS-PROT:P31168
A002012_01	At1g21700		-0.002	0.002	0.15	-0.088	-0.287	-0.492	-0.084	-0.017	-0.861	-0.161	-0.141	-0.083	0.012	-0.218		0	0.0155	0.0988113		-0.287	-0.3482	0.341644		-0.141	-0.1182	0.0873253		At1g21700	SWIRM domain-containing protein / DNA-binding family protein contains similarity to SWI/SNF complex 170 KDa subunit [Homo sapiens] gi|1549241|gb|AAC50694; contains Pfam domain PF04433: SWIRM domain, PF00249: Myb-like DNA-binding domain
A002013_01	At1g10470	0.075	0	-0.651	-0.076	0.283	-0.002	0.029	0.132	0.225	0.4	-0.141	-0.018	0.115	-0.11	0.034		0	-0.0738	0.349306		0.132	0.1568	0.16276		-0.018	-0.024	0.104649		At1g10470	two-component responsive regulator / response regulator 4 (ARR4) identical to responce regulator1 GI:3273195 from [Arabidopsis thaliana]; identical to cDNA ARR4 mRNA for response regulator 4 GI:3953596
A002014_01	At1g15950	-0.022	-0.264	0.011	0.248	0	-0.079	-0.145	-0.569	-0.19	-0.034	-0.055	-0.083	-0.444	-0.397	-0.065		0	-0.0054	0.181424		-0.145	-0.2034	0.21297		-0.083	-0.2088	0.194227		At1g15950	cinnamoyl-CoA reductase, putative nearly identical to CCR1 (GI:12034897), similar to cinnamoyl CoA reductase GI:2058310 from [Eucalyptus gunnii]
A002015_01	At1g07310	0	-0.029	-1.295	0.705	0.622	0.143	0.198	0.208	-0.056	-0.714	0.461	0.668	-0.057	0.052	1.1		0	0.0006	0.800277		0.143	-0.0442	0.389256		0.461	0.4448	0.470495		At1g07310	C2 domain-containing protein contains similarity to shock protein SRC2 [Glycine max] gi|2055230|dbj|BAA19769 ; contains Pfam profile PF00168:C2 domain
A002016_01	At1g54080	-0.104	0.013	-0.182	0.356	0	-0.161	-0.09	0.118	0.008	-0.039	0.284	0.113	0.034	0.075	0.587		0	0.0166	0.205832		-0.039	-0.0328	0.10506		0.113	0.2186	0.226851		At1g54080	oligouridylate-binding protein, putative similar to oligouridylate binding protein GI:6996560 from [Nicotiana plumbaginifolia]
A002017_01	At1g21830	0.12	-0.079	0.004	-0.273	0	0.05	-0.272	0.123	0.116	-0.116	-0.735	-0.338	-0.504	-0.639	-0.2		0	-0.0456	0.145593		0.05	-0.0198	0.170708		-0.504	-0.4832	0.217598		At1g21830	expressed protein EST gb|T21171 comes from this gene
A002019_01	At1g15030	0	0.092	-0.833	-0.077	0.045	-0.217	-0.156	-0.083	-0.244	-2.005	-0.426	0.016	-0.338	-0.416	-0.469		0	-0.1546	0.384318		-0.217	-0.541	0.820742		-0.416	-0.3266	0.197266		At1g15030	expressed protein
A002020_01	At1g34780	-0.162	0.022	-0.145	0	0.304	-0.422	-0.107	-0.206	0.049	0.332	-0.211	-0.293	-0.042	0	0.277		0	0.0038	0.187148		-0.107	-0.0708	0.282635		-0.042	-0.0538	0.220449		At1g34780	protein disulfide isomerase-related contains weak similarity to Pfam:P08003 protein disulfide isomerase A4 precursor (Protein ERp-72, ERp72) [Mus musculus]
A002023_01	At1g54780	0.319	0.207	-0.463	-0.088	0	-0.484	-0.492	-0.273	-0.318	-1.043	-0.847	-0.753	-0.399	-0.532	-0.659		0	-0.005	0.302737		-0.484	-0.522	0.307165		-0.659	-0.638	0.177274		At1g54780	thylakoid lumen 18.3 kDa protein SP:Q9ZVL6
A002024_01	At1g79430	0.15	0	-0.496	0.264	-0.197	-0.004	-0.403	-0.088	0.113	0.045	-0.483	-0.065	-0.304	-0.377	-0.025		0	-0.0558	0.300605		-0.004	-0.0674	0.201401		-0.304	-0.2508	0.19886		At1g79430	myb family transcription factor-related
A002026_01	At1g31812	0	-0.207	0.178	-0.021	0.148	0.448	0.288	0.206	0.204	0.528	0.47	0.336	-0.029	-0.126	0.567		0	0.0196	0.154076		0.288	0.3348	0.146653		0.336	0.2436	0.306308		At1g31812	acyl-CoA binding protein / ACBP identical to acyl-CoA-binding protein (ACBP) [Arabidopsis thaliana] SWISS-PROT:P57752
A002027_01	At1g06210	-0.079	0	-0.579	0.083	0.058	-0.485	-0.394	-0.087	-0.014	-0.712	0.044	-0.126	0.138	-0.003	0.159		0	-0.1034	0.273074		-0.394	-0.3384	0.288356		0.044	0.0424	0.115279		At1g06210	VHS domain-containing protein / GAT domain-containing protein weak similarity to SP|Q9UJY5 ADP-ribosylation factor binding protein GGA1 {Homo sapiens}; contains Pfam profiles PF00790: VHS domain, PF03127: GAT domain
A002028_01	At1g10030	0.068	-0.165	0	-0.362	0.248	-0.154	-0.063	-0.132	-0.168	0.372	-0.244	-0.622	-0.261	-0.27	0.05		0	-0.0422	0.232106		-0.132	-0.029	0.227767		-0.261	-0.2694	0.238254		At1g10030	integral membrane family protein contains Pfam PF03694: Erg28 like protein
A002031_01	At1g30820	-0.18	-0.017	0.364	0	0.319	0.092	-0.265	-0.333	-0.872	-0.679	-0.293	-0.36	-0.577	-0.755	-0.102		0	0.0972	0.234364		-0.333	-0.4114	0.37575		-0.36	-0.4174	0.253817		At1g30820	CTP synthase, putative / UTP--ammonia ligase, putative similar to SP|P17812 CTP synthase (EC 6.3.4.2) (UTP--ammonia ligase) {Homo sapiens}; contains Pfam profile PF00117: glutamine amidotransferase class-I; similar to ESTs gb|AA660762, gb|AA220982, dbj|AU
A002032_01	At1g04960	0.248	0.164	0	-0.064	-0.024	-0.061	-0.023	0.294	0.263	-0.425	0.042	0.157	0.239	0.162	-0.279		0	0.0648	0.134236		-0.023	0.0096	0.291556		0.157	0.0642	0.204335		At1g04960	expressed protein
A002033_01	At1g10940	0	-0.069	0.34	0.202	-0.148	0.31	0.157	0.155	0.154	0.549	-0.002	0.178	-0.041	-0.064	-0.273		0	0.065	0.201211		0.157	0.265	0.172312		-0.041	-0.0404	0.161116		At1g10940	serine/threonine protein kinase, putative similar to serine/threonine-protein kinase ASK1 [Arabidopsis thaliana] SWISS-PROT:P43291
A002035_01	At1g49970	0	-0.254	0.047	0.062	-0.03	0.093	0.164	0.13	0.136	0.24	0.171	0.214	0.172	0.043	0.243		0	-0.035	0.127812		0.136	0.1526	0.0550164		0.172	0.1686	0.0764676		At1g49970	ATP-dependent Clp protease proteolytic subunit (ClpR1) (nClpP5) identical to nClpP5 GB:BAA82069 GI:5360595 from [Arabidopsis thaliana]; identical to cDNA nClpP5 (nuclear encoded ClpP5) GI:5360594
A002037_01	At1g74320	0	0.029	0.529	-0.359	-0.347	-0.548	-0.403	-0.347	-0.326	-0.525	-0.5	-0.296	0.003	-0.054	-0.744		0	-0.0296	0.362488		-0.403	-0.4298	0.101714		-0.296	-0.3182	0.311376		At1g74320	choline kinase, putative similar to GmCK2p choline kinase gi|1438881|gb|AAC49375
A002038_01	At1g74740	0.103	-0.017	0.638	0	0	0.226	0.382	0.646	0.43	0.102	0.339	0.261	0.47	0.611	-0.03		0	0.1448	0.27978		0.382	0.3572	0.20716		0.339	0.3302	0.241352		At1g74740	calcium-dependent protein kinase, putative / CDPK, putative similar to calcium-dependent protein kinase [Arabidopsis thaliana] gi|604880|dbj|BAA04829; contains protein kinase domain, Pfam:PF00069; contains EF hand domain (calcium-binding EF-hand), Pfam:PF
A002042_01	At1g49410	-0.108	-0.173	0.147	0	0.09	0.264	0.183	-0.171	-0.082	0.542	0.283	0.202	-0.012	-0.11	0.774		0	-0.0088	0.133149		0.183	0.1472	0.284857		0.202	0.2274	0.344115		At1g49410	expressed protein
A002044_01	At1g27630	0.213	0.215	-0.213		-0.314	0.371	0.451	0.328	0.334		0.67	0.684	0.546	0.516	0.543		0	-0.02475	0.278752		0.353	0.371	0.0566216		0.546	0.5918	0.0788048		At1g27630	cyclin family protein similar to cyclin T1 [Homo sapiens] GI:2981196; contains Pfam profile PF00134: Cyclin, N-terminal domain
A002045_01	At1g74670	0.002	-0.163	0.054	-0.336	0	-0.202	-0.193	-0.214	-1.173	-0.693	-0.646	-0.744	-0.966	-1.237	-1.012		0	-0.0886	0.160573		-0.214	-0.495	0.434425		-0.966	-0.921	0.232979		At1g74670	gibberellin-responsive protein, putative similar to SP|P46690 Gibberellin-regulated protein 4 precursor {Arabidopsis thaliana} GASA4; contains Pfam profile PF02704: Gibberellin regulated protein
A002047_01	At1g15820	0.032	0	-1.477	0.102	-0.055	-0.384	0.063	-0.214	-0.219	-1.297	-0.318	-0.146	-0.016	0.04	0.012		0	-0.2796	0.67177		-0.219	-0.4102	0.521074		-0.016	-0.0856	0.148158		At1g15820	chlorophyll A-B binding protein, chloroplast (LHCB6) nearly identical to Lhcb6 protein [Arabidopsis thaliana] GI:4741960; contains Pfam profile PF00504: Chlorophyll A-B binding protein
A002048_01	At1g27200	-0.01	0	-0.219	0.556	0.098	0.104	-0.035	0.525	0.221	-0.115	0.557	0.123	0.686	0.245	0.298		0	0.085	0.287522		0.104	0.14	0.250865		0.298	0.3818	0.23235		At1g27200	expressed protein contains Pfam PF01697: Domain of unknown function
A002050_01	At1g07200	-0.082	0.162	0.889	0	-0.272	0.215	-0.174	-0.098	0.048	0.713	0.181	0.194	0.224	0.463	0.247		0	0.1394	0.447245		0.048	0.1408	0.352723		0.224	0.2618	0.115385		At1g07200	ATP-dependent Clp protease ClpB protein-related similar to ATP-dependent Clp protease, ATP-binding subunit ClpB (GI:24982014) [Pseudomonas putida KT2440]; similar to ClpB protein (SP:Q9RA63){Thermus thermophilus}
A002052_01	At1g20340	-0.129	0.235	-0.521	0.391	0	-0.167	0.214	0.279	-0.056	-0.749	-0.131	-0.115	0.057	-0.148	0		0	-0.0048	0.352162		-0.056	-0.0958	0.409199		-0.115	-0.0674	0.0905886		At1g20340	plastocyanin similar to plastocyanin GI:1865683 from [Arabidopsis thaliana]
A002054_01	At1g22750	-0.014	0.039	0.407	-0.055	0	-0.254	-0.303	-0.19	-0.084	0.396	-0.226	-0.111	0.205	-0.078	-0.077		0	0.0754	0.188391		-0.19	-0.087	0.282158		-0.078	-0.0574	0.158872		At1g22750	expressed protein
A002059_01	At1g62390	-0.043	0.013	0	0.16	-0.438	0.13	0.009	0.12	-0.033	-1.067	0.251	0.29	0.07	0.237	0		0	-0.0616	0.22388		0.009	-0.1682	0.507322		0.237	0.1696	0.126836		At1g62390	octicosapeptide/Phox/Bem1p (PB1) domain-containing protein / tetratricopeptide repeat (TPR)-containing protein contains Pfam profiles PF00564: PB1 domain, PF00515: TPR Domain
A002060_01	At1g50900	0	-0.003	-0.296	0.19	0.355	-0.511	-0.485	-0.621	-0.471	-0.413	-0.588	-0.695	-0.541	-0.636	0.021		0	0.0492	0.243745		-0.485	-0.5002	0.0764801		-0.588	-0.4878	0.290105		At1g50900	expressed protein
A002061_01	At1g21760	-0.002	0.109	-0.713	0	0.183	-0.296	-0.094	0.047	-0.287	-1.115	0.154	0.109	0.136	0.114	0.189		0	-0.0846	0.359846		-0.287	-0.349	0.451456		0.136	0.1404	0.0325929		At1g21760	F-box family protein Contains PF|00646 F-box domain. ESTs gb|Z37267, gb|R90412, gb|Z37268 and gb|T88189 come from this gene similar to SKP1 interacting partner 2 (SKIP2) TIGR_Ath1:At5g67250
A002062_01	At1g69830	0.12	-0.04	0.894	0	-0.321	0.239	0.198	0.24	0.068	0.685	-0.693	-0.682	-0.292	-0.226	-0.868		0	0.1306	0.456343		0.239	0.286	0.233877		-0.682	-0.5522	0.278618		At1g69830	alpha-amylase, putative / 1,4-alpha-D-glucan glucanohydrolase, putative similar to SP|P17859 Alpha-amylase precursor (EC 3.2.1.1) (1,4-alpha-D-glucan glucanohydrolase) {Vigna mungo}, alpha-amylase [Malus x domestica] GI:7532799; contains Pfam profile PF00
A002065_01	At1g72030	-0.01	0.237	-0.21	0	0.076	-0.451	-0.306	-0.373	-0.51	-1.083	-0.344	-0.284	-0.317	-0.284	-0.41		0	0.0186	0.161567		-0.451	-0.5446	0.310729		-0.317	-0.3278	0.0523756		At1g72030	GCN5-related N-acetyltransferase (GNAT) family protein contains Pfam profile PF00583: acetyltransferase, GNAT family
A002066_01	At1g74920	0.004	0	-0.054	0.034	-0.047	0.173	0.083	-0.015	0.002	-0.153	0.059	0.149	-0.112	-0.088	0.049		0	-0.0126	0.0370918		0.002	0.018	0.121281		0.049	0.0114	0.109226		At1g74920	betaine-aldehyde dehydrogenase, putative identical to betaine-aldehyde dehydrogenase, chloroplast precursor (BADH) [Arabidopsis thaliana] SWISS-PROT:Q9S795; strong similarity to betaine aldehyde dehydrogenase [Amaranthus hypochondriacus] GI:2388710
A002068_01	At1g74880	-0.109	-0.07	0	0.011	0.21	-0.535	-0.594	-0.406	-0.651	-0.584	-0.63	-0.748	-0.583	-0.752	-0.403		0	0.0084	0.123135		-0.584	-0.554	0.0924311		-0.63	-0.6232	0.143453		At1g74880	expressed protein
A002069_01	At1g47210	0	-0.563	0.025	-0.564	0.198	-0.823	-0.951	-0.917	-0.858	-0.226	-1.157	-1.325	-1.071	-0.924			0	-0.1808	0.357579		-0.858	-0.755	0.299889		-1.114	-1.11925	0.16754		At1g47210	cyclin family protein similar to A-type cyclin [Catharanthus roseus] GI:2190259; contains Pfam profile PF00134: Cyclin, N-terminal domain
A002070_01	At1g02500	0.173	-0.069	-1.211	0.168	0	-0.232	-0.248	-0.041	-0.124	-1.232	-0.287	-0.356	-0.413	-0.194	-0.156		0	-0.1878	0.581612		-0.232	-0.3754	0.486206		-0.287	-0.2812	0.107563		At1g02500	S-adenosylmethionine synthetase 1 (SAM1) identical to S-adenosylmethionine synthetase 1 (Methionine adenosyltransferase 1, AdoMet synthetase 1) [Arabidopsis thaliana] SWISS-PROT:P23686
A002075_01	At1g67740	-0.2	0	-0.278	0.331	0.071	-0.385	-0.047	-0.346	-0.184	-0.472	-0.435	-0.411	0.019	0.031	-0.009		0	-0.0152	0.240172		-0.346	-0.2868	0.16994		-0.009	-0.161	0.239762		At1g67740	photosystem II core complex proteins psbY, chloroplast (PSBY) / L-arginine metabolising enzyme identical to SP:O49347 Photosystem II core complex proteins psbY, chloroplast precursor (L-arginine metabolising enzyme) (L-AME) [Contains: Photosystem II prote
A002078_01	At1g27760	0	0.146	-0.14	0.048	-0.29	-0.081	-0.1	-0.038	0.209	-0.787	0.036	0.205	0.166	0.353	-0.275		0	-0.0472	0.170427		-0.081	-0.1594	0.37216		0.166	0.097	0.236678		At1g27760	interferon-related developmental regulator family protein / IFRD protein family contains Pfam PF05004: Interferon-related developmental regulator (IFRD); similar to IFR1 protein GI:16580630 [Gallus gallus]; similar to Interferon-related developmental regu
A002079_01	At1g77670	0	-0.03	-0.392	0.07	0.143	0.302		-0.288	-0.001	0.229	0.181	-0.358	-0.182	-0.473	0.419		0	-0.0418	0.206868		0.114	0.0605	0.2658		-0.182	-0.0826	0.373907		At1g77670	aminotransferase class I and II family protein similar to kynurenine aminotransferase /glutamine transaminase K GI:1030066 [Rattus norvegicus]
A002082_01	At1g72450	0.403	0	-0.288	-0.123	0.053	-0.242	-0.238	-0.094	0.349	-0.995	-0.211	-0.303	-0.149	-0.264	-0.238		0	0.009	0.256362		-0.238	-0.244	0.484301		-0.238	-0.233	0.0579353		At1g72450	expressed protein
A002083_01	At1g60200	-0.021	0	0.743	0.412	-0.123	0.166	0.297	0.219	-0.112	0.099	0.327	0.451	0.068	0.317	0.307		0	0.2022	0.365013		0.166	0.1338	0.15537		0.317	0.294	0.139205		At1g60200	splicing factor PWI domain-containing protein / RNA recognition motif (RRM)-containing protein contains Pfam profiles PF01480: PWI domain, PF00076: RNA recognition motif. (a.k.a. RRM, RBD, or RNP domain)
A002084_01	At1g01470	0.089	-0.001	-0.29	0.25	0	0.449	0.294	0.513	0.759	0.746	0.712	-0.228	0.089	-0.27	0.295		0	0.0096	0.196253		0.513	0.5522	0.199486		0.089	0.1196	0.404739		At1g01470	late embryogenesis abundant protein, putative / LEA protein, putative similar to SP|P46518 Late embryogenesis abundant protein Lea14-A {Gossypium hirsutum}; contains Pfam profile PF03168: Late embryogenesis abundant protein
A002085_01	At1g31130	0.291	0	-0.444	-0.077	0.037	0.486	0.372	0.743	0.957	0.941	0.239	0.169	0.308	0.026	-0.131		0	-0.0386	0.265361		0.743	0.6998	0.264272		0.169	0.1222	0.175868		At1g31130	expressed protein
A002086_01	At1g69620	0.057	0	-0.342	-0.155	0.03	0.448	0.333	-0.067	-0.158	-0.423	0.269	0.146	0.024	0.076	0.28		0	-0.082	0.166972		-0.067	0.0266	0.359318		0.146	0.159	0.114044		At1g69620	60S ribosomal protein L34 (RPL34B) similar to SP:Q42351 from [Arabidopsis thaliana]
A002088_01	At1g25550	0.128	-0.101	0.068	-0.174	0	0.619	0.8	0.944	0.829	1.417	1.01	1.07	1.361	1.2	1		0	-0.0158	0.122716		0.829	0.9218	0.300354		1.07	1.1282	0.152598		At1g25550	myb family transcription factor contains Pfam domain, PF00249: Myb-like DNA-binding domain
A002089_01	At1g80930	0.007	0	-0.143	0.174	-0.392	-0.039	0.041	0.094	0.03	-0.237	0.274	0.336	0.337	0.477	0.24		0	-0.0708	0.211763		0.03	-0.0222	0.129076		0.336	0.3328	0.0906791		At1g80930	MIF4G domain-containing protein / MA3 domain-containing protein similar to SP|Q9P6R9 Cell cycle control protein cwf22 {Schizosaccharomyces pombe}; contains Pfam profiles PF02854: MIF4G domain, PF02847: MA3 domain
A002090_01	At1g74730	0.275	0	-0.449	-0.002	0.256	-0.387	-0.458	-0.401	-0.259	-0.62	-0.652	-0.502	-0.449	-0.613	-0.244		0	0.016	0.292184		-0.401	-0.425	0.131044		-0.502	-0.492	0.161008		At1g74730	expressed protein
A002091_01	At1g80490	-0.165	0	0.311	0.431	-0.169	0.137	-0.018	-0.063	0.262	1.111	0.138	-0.111	0.272	-0.004	0.407		0	0.0816	0.276123		0.137	0.2858	0.478962		0.138	0.1404	0.207637		At1g80490	WD-40 repeat family protein contains 9 WD-40 repeats domain (PF00400) (6 weak)
A002092_01	At1g04000	-0.048	0	-0.898	0.168	0.257	-0.521	-0.363	-0.098	-0.36	-0.989	-0.505	-0.819	-0.25	-0.572	-0.47		0	-0.1042	0.460623		-0.363	-0.4662	0.329326		-0.505	-0.5232	0.204743		At1g04000	expressed protein Location of ESTs 203I24T7, gb|H76794 and 203I24XP, gb|AA605510
A002094_01	At1g74560	0.253	0.097	0	-0.094	0	0.36	0.26	0.108	-0.02	-0.096	0.504	0.369	0.239	0.437	0.788		0	0.0512	0.131479		0.108	0.1224	0.189454		0.437	0.4674	0.204265		At1g74560	nucleosome assembly protein (NAP) family protein similar to SP|Q01105 SET protein (HLA-DR associated protein II) (PHAPII) (Phosphatase 2A inhibitor I2PP2A) {Homo sapiens}; contains Pfam profile: PF00956 nucleosome assembly protein (NAP)
A002095_01	At1g62300	0	-0.493	0.23	-0.177	0.416	0.046	0.089	0.24	0.665	1.017	0.07	0.032	0.098	-0.095	0.539		0	-0.0048	0.353631		0.24	0.4114	0.417702		0.07	0.1288	0.240898		At1g62300	WRKY family transcription factor similar to putative DNA-binding protein GI:7268215 from [Arabidopsis thaliana]
A002096_01	At1g74470	0.164	-0.113	-0.502	0.096	0	0.063	0.076	-0.209	-0.672	-0.848	-0.034	0.122	-0.254	-0.402	-0.061		0	-0.071	0.262526		-0.209	-0.318	0.42382		-0.061	-0.1258	0.204177		At1g74470	geranylgeranyl reductase identical to geranylgeranyl reductase GB:Y14044 [Arabidopsis thaliana] (involvement: chlorophyll, the tocopherol and the phylloquinone pathways Eur J Biochem 1998 Jan 15;251(1-2):413-7)
A002102_01	At1g02640	-0.238	0	-0.016	0.201	0.24	0.089	-0.08	0.195	0.006	0.428	-0.326	-0.797	-0.39	-0.439	-0.057		0	0.0374	0.192294		0.089	0.1276	0.196314		-0.39	-0.4018	0.265678		At1g02640	glycosyl hydrolase family 3 protein similar to beta-xylosidase GB:Z84377 GI:2102655 from [Aspergillus niger]
A002103_01	At1g30360	-0.009	0	-0.483	0.288	0.253	0.52	0.728	0.837	0.729	0.277	0.671	0.328	0.276	0.349	0.608		0	0.0098	0.308157		0.728	0.6182	0.222636		0.349	0.4464	0.179653		At1g30360	early-responsive to dehydration stress protein (ERD4) nearly identical to ERD4 protein (early-responsive to dehydration stress) [Arabidopsis thaliana] GI:15375406; contains Pfam profile PF02714: Domain of unknown function DUF221
A002105_01	At1g68840	0.168	0	-1.01	-0.037	0.383	-0.173	-0.096	1.246	0.542	0.023	0.287	0.062	0.83	0.706	0.605		0	-0.0992	0.535532		0.023	0.3084	0.593802		0.605	0.498	0.316051		At1g68840	DNA-binding protein RAV2 (RAV2) / AP2 domain-containing protein RAP2.8 identical to RAV2 GI:3868859 from [Arabidopsis thaliana], AP2 domain containing protein RAP2.8 [Arabidopsis thaliana] GI:2281641; contains Pfam profile: PF00847 AP2-domain
A002106_01	At1g08680	-0.217	0	-0.351	0.264	0.128	-0.288	-0.26	-0.291	-0.456	-0.956	-0.082	0.016	-0.298	-0.13	-0.171		0	-0.0352	0.250087		-0.291	-0.4502	0.293128		-0.13	-0.133	0.115629		At1g08680	ARF GAP-like zinc finger-containing protein ZiGA4 (ZIGA4) nearly identical to ARF GAP-like zinc finger-containing protein ZiGA4 GI:10441354 from [Arabidopsis thaliana]; contains InterPro accession IPR001164: Human Rev interacting-like protein (hRIP)
A002107_01	At1g11360	-0.125	0	-0.625	0.062	0.006	0.19	0.271	0.447	0.092	-0.918	0.302	0.455	0.26	0.174	0.521		0	-0.1364	0.28156		0.19	0.0164	0.538329		0.302	0.3424	0.142616		At1g11360	universal stress protein (USP) family protein contains Pfam PF00582: universal stress protein family domain; similar to ethylene-responsive ER6 protein (GI:5669654) [Lycopersicon esculentum]
A002108_01	At1g10170		0.211	-0.211	0.521	-0.595	0.091	-0.087	0.598	0.698	-0.119	0.982	0.571	0.925	0.993	0.685		0	-0.0185	0.487558		0.091	0.2362	0.385962		0.925	0.8312	0.19157		At1g10170	NF-X1 type zinc finger family protein contains Pfam PF01422: NF-X1 type zinc finger; similar to transcriptional repressor NF-X1 (SP:Q12986) [Homo sapiens]; similar to EST gb|T21002
A002109_01	At1g08710	-0.044	0.073	-0.229	0.224	0	0.286	0.4	0.326	0.208	-0.37	0.453	0.564	0.133	0.203	0.612		0	0.0048	0.165655		0.286	0.17	0.309732		0.453	0.393	0.214768		At1g08710	F-box family protein similar to ESTs gb|T22270 and gb|T76886 ; similar to SKP1 interacting partner 2 (SKIP2) TIGR_Ath1:At5g67250
A002112_01	At1g53480	0	0.029	-0.698	-0.011	0.116	0.129	0.052	-0.204	-0.304	-1.053	0.359	0.336	0.037	0.169	0.468		0	-0.1128	0.330909		-0.204	-0.276	0.469389		0.336	0.2738	0.17022		At1g53480	expressed protein
A002115_01	At1g36310	-0.028	0.123	0.125	-0.072	0	0.504	0.458	0.162	0.169	0.063	0.595	0.624	0.273	0.405	0.458		0	0.0296	0.0899183		0.169	0.2712	0.196727		0.458	0.471	0.143626		At1g36310	expressed protein
A002116_01	At1g75840	0	-0.23	0.084	-0.266	0.06	0.429	0.384	0.197	0.185	0.473	-0.051	-0.184	0.034	0.014	-0.014		0	-0.0704	0.165477		0.384	0.3336	0.133992		-0.014	-0.0402	0.0864939		At1g75840	Rac-like GTP-binding protein (ARAC5) / Rho-like GTP-binding protein (ROP4) identical to RAC-like GTP-binding protein (ARAC5) SP:Q38937 [Arabidopsis thaliana], Rho-like GTP binding protein [Arabidopsis thaliana] GI:2654009; identical to cDNA Rho-like GTP b
A002117_01	At1g79350		-0.036	0.036	0.311	-0.357	-0.044	0.003	0.28	0.122		0.012	-0.029	0.052	0.272	0.08		0	-0.0115	0.274611		0.062	0.09025	0.144509		0.052	0.0774	0.116318		At1g79350	DNA-binding protein, putative contains Pfam PF00628: PHD-finger domain; contains TIGRFAMS TIGR01053: zinc finger domain, LSD1 subclass; contains Pfam PF00271: Helicase conserved C-terminal domain; similar to WSSV086 (GI:19481678)[shrimp white spot syndrom
A002130_01	At1g20670	-0.158	-0.131	0.291	0.129	0	0.016	0.154	-0.214	-0.15	0.074	0.024	0.405	-0.052	-0.132	0.258		0	0.0262	0.187093		0.016	-0.024	0.154		0.024	0.1006	0.223993		At1g20670	DNA-binding bromodomain-containing protein contains bromodomain, INTERPRO:IPR001487
A002135_01	At1g65280	-0.25	0	0.331	0.235	-0.422	0	-0.186	0.075	0.084	0.037	0.244	0.172	0.254	0.315	0.286		0	-0.0212	0.31746		0.037	0.002	0.110257		0.254	0.2542	0.0537792		At1g65280	DNAJ heat shock N-terminal domain-containing protein contains Pfam profile PF00226 DnaJ domain
A002138_01	At1g18890	0.267	0	0.864	-0.415	-0.103	0.606	0.522	0.749	1.593	1.42	0.056	0.432	0.756	0.733	-0.273		0	0.1226	0.481006		0.749	0.978	0.493039		0.432	0.3408	0.445082		At1g18890	calcium-dependent protein kinase 1 (CDPK1) identical to calcium-dependent protein kinase [Arabidopsis thaliana] gi|604880|dbj|BAA04829; contains protein kinase domain, Pfam:PF00069; contains EF hand domain (calcium-binding EF-hand), Pfam:PF00036, INTERPRO
A002139_01	At1g09770	-0.044	0	1.404	0.319	-0.091	0.691	0.496	0.121	0.085	0.769	0.497	0.629	0.164	0.264	0.375		0	0.3176	0.628261		0.496	0.4324	0.316968		0.375	0.3858	0.184159		At1g09770	myb family transcription factor contains Pfam profile: PF00249 myb-like DNA-binding domain
A002140_01	At1g15700	-0.023	0.14	0.509	0	-0.29	0.16	0.067	0.311	0.027	0.566	0.269	0.094	0.225	0.139	0.139		0	0.0672	0.291861		0.16	0.2262	0.219125		0.139	0.1732	0.0715416		At1g15700	ATP synthase gamma chain 2, chloroplast (ATPC2) identical to SP|Q01909 ATP synthase gamma chain 2, chloroplast precursor (EC 3.6.3.14) {Arabidopsis thaliana}; contains Pfam profile: PF00231 ATP synthase; similar to ATP synthase gamma-subunit GI:21241 from
A002142_01	At1g56450	0.18	0	0.573	-0.128	-0.081	0.35	0.309	0.485	0.639	0.792	0.504	0.525	0.784	0.765	0.393		0	0.1088	0.284819		0.485	0.515	0.201659		0.525	0.5942	0.172194		At1g56450	20S proteasome beta subunit G1 (PBG1) (PRCH) identical to 20S proteasome beta subunit (PBG1) GI:3421123 [Arabidopsis thaliana]; identical to cDNA proteasome subunit prch GI:2511597
A002146_01	At1g24360	0.16	0.191	-0.606	0	-0.096	0.185	0.113	0.144	0.143	-1.392	0.208	0.283	0.003	0.309	0.052		0	-0.0702	0.321673		0.143	-0.1614	0.688403		0.208	0.171	0.137242		At1g24360	3-oxoacyl-[acyl-carrier protein] reductase, chloroplast / 3-ketoacyl-acyl carrier protein reductase identical to 3-oxoacyl-[acyl-carrier protein] reductase SP:P33207 from [Arabidopsis thaliana]
A002153_01	At1g80680	0	-0.106	0.071	0.494	-0.264	0.226	-0.108	0.288	0.106		0.684	0.502	0.35	0.425	0.765		0	0.039	0.283903		0.166	0.128	0.174532		0.502	0.5452	0.174639		At1g80680	nucleoporin family protein contains Pfam profile: PF04096 nucleoporin autopeptidase
A002163_01	At1g13980	-0.031	-0.086	0.645	0.361	0	0.73	0.771	0.699	0.376	0.966	0.734	0.927	0.722	0.66	1.227		0	0.1778	0.314896		0.73	0.7084	0.212909		0.734	0.854	0.231256		At1g13980	pattern formation protein (EMB30) (GNOM) identical to SP|Q42510; contains Pfam profile PF01369: Sec7 domain
A002165_01	At1g54340	-0.073	0.039	0.464	0	-0.248	0.176	0.195	0.148	0.015	0.61	0.108	0.201	0.354	0.359	0.124		0	0.0364	0.263166		0.176	0.2288	0.224434		0.201	0.2292	0.121424		At1g54340	isocitrate dehydrogenase, putative / NADP+ isocitrate dehydrogenase, putative strong similarity to NADP-isocitrate dehydrogenase GI:5764653 from [Citrus limon]; Nicotiana tabacum SP|P50218
A002166_01	At1g71695	-0.036	0	-0.054	0.341	0.522	-0.375	-0.111	-0.162	-0.355	-0.418	-0.29	-0.551	-0.731	-0.509	0.231		0	0.1546	0.261472		-0.355	-0.2842	0.137923		-0.509	-0.37	0.370811		At1g71695	peroxidase 12 (PER12) (P12) (PRXR6) identical to SP|Q96520 Peroxidase 12 precursor (EC 1.11.1.7) (Atperox P12) (PRXR6) (ATP4a) {Arabidopsis thaliana}
A002167_01	At1g54360	0.023	-0.239	0.033	0	-0.008	-0.249	-0.299	-0.339	-0.184	0.232	-0.243	-0.114	-0.534	-0.404	0.011		0	-0.0382	0.113476		-0.249	-0.1678	0.230878		-0.243	-0.2568	0.218407		At1g54360	expressed protein
A002172_01	At1g28340	0.293	0	-0.177	0.115	-0.305	-0.153	0.076	0.141	0.166	-0.706	-0.291	-0.259	-0.026	0.072	-0.359		0	-0.0148	0.235761		0.076	-0.0952	0.363917		-0.259	-0.1726	0.185438		At1g28340	leucine-rich repeat family protein contains leucine rich-repeat (LRR) domains Pfam:PF00560, INTERPRO:IPR001611; contains some similarity to receptor-like protein kinases
A002175_01	At1g28510	0.37	0.005	-0.025	-0.089	0	0.424	0.368	0.222	0.418	-0.307	0.311	0.462	0.133	0.075	0.209		0	0.0522	0.181554		0.368	0.225	0.308355		0.209	0.238	0.153248		At1g28510	expressed protein
A002176_01	At1g15920	0.105	0	-0.3	-0.154	0.296	-0.057	-0.103	-0.276	-0.111	-0.378	-0.079	-0.111	-0.445	-0.21	-0.004		0	-0.0106	0.230106		-0.111	-0.185	0.136119		-0.111	-0.1698	0.170692		At1g15920	CCR4-NOT transcription complex protein, putative similar to SWISS-PROT:Q60809 CCR4-NOT transcription complex, subunit 7 (CCR4-associated factor 1, (CAF1) [Mus musculus]
A002177_01	At1g16020	0	-0.187	-0.766	0.078	0.394	-0.856	-0.714	-0.498	-0.57	-0.894	-0.786	-0.808	-0.575	-0.634	-0.55		0	-0.0962	0.429177		-0.714	-0.7064	0.172965		-0.634	-0.6706	0.119603		At1g16020	expressed protein
A002178_01	At1g16040	0.023	0.133	-0.316	-0.117	0	0.192	0.189	0.316	0.199	-0.037	0.319	0.491	0.547	0.471	0.564		0	-0.0554	0.1706		0.192	0.1718	0.128291		0.491	0.4784	0.0970247		At1g16040	expressed protein similar To Phosphatidylinositol-glycan biosynthesis, class F protein (PIG-F). (Mouse) (SP:O09101) [Mus musculus]; contains six transmembrane domains;
A002180_01	At1g30450	-0.311	-0.27	0.143	0.094	0	-0.016	-0.313	-0.177	0.073	0.54	-0.487	-0.316	-0.023	-0.076	-0.207		0	-0.0688	0.209308		-0.016	0.0214	0.325651		-0.207	-0.2218	0.187218		At1g30450	cation-chloride cotransporter, putative similar to cation-chloride co-transporter GB:AAC49874 GI:2582381 from [Nicotiana tabacum], Cation-Chloride Cotransporter (CCC) Family Member, PMID:11500563
A002183_01	At1g74430		-0.137	0.756	0		0.527	-0.111	-0.041	0.509	0.71	0.241	0.009	-0.112	-0.215	0.321		0	0.206333	0.480929		0.509	0.3188	0.369711		0.009	0.0488	0.228071		At1g74430	myb family transcription factor (MYB95) contains Pfam profile: PF00249 myb-like DNA-binding domain
A002191_01	At1g19080	0	0.155	0.108	-0.356	-0.031	0.059	0.32	0.214	0.216	0.102	0.035	0.195	0.427	0.409	0.334		0	-0.0248	0.200194		0.214	0.1822	0.103384		0.334	0.28	0.164633		At1g19080	expressed protein
A002195_01	At1g04830	0.192	0.068	-0.431	-0.002	0	-0.328	-0.35	-0.248	-0.307	-1.189	-0.15	0.075	-0.067	-0.081	-0.221		0	-0.0346	0.235195		-0.328	-0.4844	0.395709		-0.081	-0.0888	0.110214		At1g04830	RabGAP/TBC domain-containing protein low similarity to SP|Q08484 GTPase-activating protein GYP1 {Saccharomyces cerevisiae}; contains Pfam profile PF00566: TBC domain
A002198_01	At1g14290	0.142	0	-0.574	-0.32	0.627	-0.804	-0.758	-0.223	-0.742	-1.478	-1.141	-1.113	-0.932	-0.965	-0.74		0	-0.025	0.458815		-0.758	-0.801	0.446585		-0.965	-0.9782	0.16103		At1g14290	acid phosphatase, putative similar to acid phosphatase [Lupinus albus] GI:5360721; contains Pfam profile PF01598 sterol desaturase
A002199_01	At1g14300	0.021	0.065	-0.295	0	-0.045	0.367	0.263	0.067	0.193	-0.442	0.569	0.513	0.366	0.568	0.474		0	-0.0508	0.142138		0.193	0.0896	0.316551		0.513	0.498	0.0839136		At1g14300	expressed protein contains Pfam PF04063: Domain of unknown function (DUF383) and PF04064: Domain of unknown function (DUF384)
A002202_01	At1g14410	0.17	0.01	-0.223	-0.235	0	0.108	0.125	0.051	0.281	-0.529	0.367	0.446	0.319	0.134	0.657		0	-0.0556	0.172117		0.108	0.0072	0.311622		0.367	0.3846	0.190647		At1g14410	DNA-binding protein-related similar to DNA-binding protein p24 GI:9651810 from [Solanum tuberosum]
A002206_01	At1g14510	0.018	0.046	-0.252	-0.039	0	0.518	0.392	-0.01	0.11	-0.564	0.613	0.751	0.364	0.437	0.469		0	-0.0454	0.11954		0.11	0.0892	0.422049		0.469	0.5268	0.1546		At1g14510	PHD finger family protein contains Pfam domain, PF00628: PHD-finger
A002209_01	At1g43850	-0.054	-0.102	0.228	0.628	0	0.18		0.015	-0.066	-0.069	0.253	0.522	0.229		0.43		0	0.14	0.300703		-0.025	0.015	0.116679		0.342	0.3585	0.141121		At1g43850	SEUSS transcriptional co-regulator identical to SEUSS transcriptional co-regulator [Arabidopsis thaliana] gi|18033922|gb|AAL57277
A002210_01	At1g43670	0	0.22	-0.842	-0.215	0.131	-0.684	-0.297	-0.141	-0.328	-1.557	-0.272	-0.353	-0.374	-0.331	-0.208		0	-0.1412	0.424577		-0.328	-0.6014	0.569949		-0.331	-0.3076	0.0674633		At1g43670	fructose-1,6-bisphosphatase, putative / D-fructose-1,6-bisphosphate 1-phosphohydrolase, putative / FBPase, putative very strong similarity to SP|P46267 Fructose-1,6-bisphosphatase, cytosolic (EC 3.1.3.11) (D-fructose-1,6- bisphosphate 1-phosphohydrolase)
A002214_01	At1g16460	0.008	-0.084	-0.211	0	0.165	-0.025	0.176	0.169	-0.161	-0.394	0.056	0.165	0.087	0.087	0.007		0	-0.0244	0.13774		-0.025	-0.047	0.239934		0.087	0.0804	0.0575048		At1g16460	mercaptopyruvate sulfurtransferase (MST2) (RDH2) identical to mercaptopyruvate sulfurtransferase GI:6009983 and thiosulfate sulfurtransferase GI:5817004 from [Arabidopsis thaliana]; contains PF|00581 Rhodanese-like domain
A002218_01	At1g79700	0	0.189	-0.349	-0.177	0.431	-0.079	0.016	0.251	-0.398	-1.201	0.262	0.093	-0.266	-0.165	-0.015		0	0.0188	0.305305		-0.079	-0.2822	0.563941		-0.015	-0.0182	0.208472		At1g79700	ovule development protein, putative similar to ovule development protein AINTEGUMENTA (GI:1209099) [Arabidopsis thaliana]
A002220_01	At1g62370	0.209	-0.08	-0.509	0.296	0	-0.243	0.311	0.232	0.132	0.41	0.339	0.541	0.234	0.218	0.449		0	-0.0168	0.314391		0.232	0.1684	0.251657		0.339	0.3562	0.138826		At1g62370	zinc finger (C3HC4-type RING finger) family protein contains Pfam profile: PF00097 zinc finger, C3HC4 type (RING finger)
A002221_01	At1g62420	-0.199	0.164	0	-0.315	0.277	0.443	0.448	0.999	0.941	1.004	0.642	0.717	0.779	0.439	0.55		0	-0.0146	0.245655		0.941	0.767	0.294536		0.642	0.6254	0.134805		At1g62420	expressed protein contains Pfam profile PF04720: Protein of unknown function (DUF506)
A002224_01	At1g78460		0.068	0.464	-0.068	-0.463	-0.27	0.879	1.312	1.641	1.918	0.951		0.339	0.637	0.92		0	0.00025	0.382497		1.312	1.096	0.856214		0.778	0.71175	0.285855		At1g78460	SOUL heme-binding family protein weak similarity to SOUL protein [Mus musculus] GI:4886906; contains Pfam profile PF04832: SOUL heme-binding protein
A002225_01	At1g78410	0.366	-0.137	-0.023	0	0.633	0.244	0.44	1.073	1.388	1.981	0.088	-0.291	0.343	0.013	0.1		0	0.1678	0.321387		1.073	1.0252	0.707141		0.088	0.0506	0.227729		At1g78410	VQ motif-containing protein contains PF05678: VQ motif
A002226_01	At1g64810	0	0.082	-0.77	-0.114	0.005	0.053	-0.04	0.137	0.229	-0.851	-0.198	0.225	-0.001	-0.02	-0.3		0	-0.1594	0.348426		0.053	-0.0944	0.434529		-0.02	-0.0588	0.201831		At1g64810	expressed protein contains Pfam PF05634: Arabidopsis thaliana protein of unknown function (DUF794)
A002230_01	At1g07870	-0.033	0.017	0	0.013	-0.282	0.381	0.252	-0.311	0.214	-0.372	0.381	0.3	0.264	0.127	-0.3		0	-0.057	0.127305		0.214	0.0328	0.347918		0.264	0.1544	0.270088		At1g07870	protein kinase family protein contains protein kinase domain, Pfam:PF00069
A002232_01	At1g07720	0	-0.301	-0.732	0.167	0.107	-0.858	-0.669	-0.682	-0.551	-1.678	-0.523	-0.983	-1.126	-1.101	-0.897		0	-0.1518	0.370994		-0.682	-0.8876	0.455238		-0.983	-0.926	0.243477		At1g07720	beta-ketoacyl-CoA synthase family protein similar to GB:AAC99312 from [Arabidopsis thaliana] (Plant J. (1999) In press)
A002237_01	At1g62880	-0.033	0.212	0.265	-0.028	0	0.269	0.034	-0.063	-0.196	-0.293	0.011	0.138	-0.02	-0.023	0.261		0	0.0832	0.143554		-0.063	-0.0498	0.217572		0.011	0.0734	0.123771		At1g62880	cornichon family protein contains Pfam profile: PF03311 cornichon protein
A002243_01	At1g01800	0.049	0	-0.681	-0.087	0.278	0.059	0.021	-0.026	-0.031	-0.764	0.168	0.319	-0.083	-0.02	0.336		0	-0.0882	0.357812		-0.026	-0.1482	0.346208		0.168	0.144	0.19137		At1g01800	short-chain dehydrogenase/reductase (SDR) family protein similar to carbonyl reductase GI:1049108 from [Mus musculus]
A002244_01	At1g53560	0.069	-0.048	-0.12	0	0.081	-0.081	-0.129	0.046	-0.067	0.11	0.041	0	-0.086	-0.253	-0.063		0	-0.0036	0.083608		-0.067	-0.0242	0.0987152		-0.063	-0.0722	0.112906		At1g53560	expressed protein
A002246_01	At1g12830	0	0.164	-0.036	-0.123	0.042	0.546	0.549	0.193	0.317	0.035	0.603	0.856	0.359	0.434	0.752		0	0.0094	0.105645		0.317	0.328	0.22392		0.603	0.6008	0.208736		At1g12830	expressed protein
A002257_01	At1g14685	0.299	0.269	-0.074	-0.097	0	0.602	0.516	0.365	0.192	-1.145	0.366	0.592	0.164	0.321	0.246		0	0.0794	0.190477		0.365	0.106	0.716518		0.321	0.3378	0.1615		At1g14685	expressed protein
A002258_01	At1g14890	-0.179	0.219	-0.414	0	0.194	0.146	0.262	0.153	-0.046	-0.039	-0.029	0.386	0.072	0.027	0.38		0	-0.036	0.265779		0.146	0.0952	0.133876		0.072	0.1672	0.200232		At1g14890	invertase/pectin methylesterase inhibitor family protein similar to pectinesterase GB:X85216 GI:732912 SP|Q43111 [Phaseolus vulgaris], SP|Q42534 from Arabidopsis thaliana; contains Pfam profile PF04043: Plant invertase/pectin methylesterase inhibitor
A002259_01	At1g14920	-0.271	-0.118	0.004	0.001	0	-0.386	-0.49	-0.203	-0.738	-0.034	-0.624	-0.53	-0.756	-0.582	-0.561		0	-0.0768	0.120303		-0.386	-0.3702	0.269659		-0.582	-0.6106	0.0881692		At1g14920	gibberellin response modulator (GAI) (RGA2) / gibberellin-responsive modulator identical to GAI GB:CAA75492 GI:2569938 [Arabidopsis thaliana] (Genes Dev. In press)
A002260_01	At1g14790	-0.239	0.141	0	0.047	-0.122	0.074	0.014	0.207	0.392	0.132	-0.219	0.193	0.124	0.201	-0.227		0	-0.0346	0.148416		0.132	0.1638	0.146165		0.124	0.0144	0.218792		At1g14790	RNA-dependent RNA polymerase, putative similar to RNA-directed RNA polymerase GB:CAA09697 GI:4138282 [Nicotiana tabacum]
A002261_01	At1g14770	-0.017	-0.077	0.486		0.017	0.288	0.258	0.311	0.19	0.794	0.174	0.127		-0.022	0.119		0	0.10225	0.258768		0.288	0.3682	0.242337		0.123	0.0995	0.0845557		At1g14770	expressed protein
A002263_01	At1g34480	0.336	0.327	-0.171	0	-0.041	0.604	0.571	0.362	0.152	-0.598	0.441	0.578	0.231	0.455	0.29		0	0.0902	0.229165		0.362	0.2182	0.491058		0.441	0.399	0.138786		At1g34480	DC1 domain-containing protein contains Pfam protein PF03107 DC1 domain
A002265_01	At1g19010	0.067	-0.067	0.085	-0.162		-0.34	-0.594	0.052	0.108	0.216	-0.122	-0.36		0.087	-0.235		0	-0.01925	0.116854		0.052	-0.1116	0.341755		-0.179	-0.1575	0.189783		At1g19010	expressed protein
A002266_01	At1g19110	0	0.068	-0.077	0.259	-0.221	-0.37	-0.458	0.064	-0.204	-1.347	-0.137	-0.102	-0.05	0.152	-0.539		0	0.0058	0.177698		-0.37	-0.463	0.532668		-0.102	-0.1352	0.251944		At1g19110	inter-alpha-trypsin inhibitor heavy chain-related similar to SP|Q61704 Inter-alpha-trypsin inhibitor heavy chain H3 precursor {Mus musculus}; contains Pfam profile PF00092: von Willebrand factor type A domain
A002267_01	At1g55910	0.226	0.194	-0.13	0	-0.034	0.14	-0.089	-0.262	0.59	0.196	-0.545	0.117	-0.344	-0.038	-0.271		0	0.0512	0.15302		0.14	0.115	0.322706		-0.271	-0.2162	0.259915		At1g55910	metal transporter, putative (ZIP11) similar to putative zinc transporter ZIP2 [Arabidopsis thaliana] gi|3252868|gb|AAC24198; member of the Zinc (Zn2+)-Iron (Fe2+) permease (ZIP) family, PMID:11500563
A002272_01	At1g55830	0.029	0	0.017	-0.343	-0.352	-0.004	0.084	0.118	0.142	-0.166	-0.079	0.184	0.187	-0.036	-0.367		0	-0.1298	0.199024		0.084	0.0348	0.125161		-0.036	-0.0222	0.228357		At1g55830	expressed protein similar to M-type 9 protein (GI:507127) [Streptococcus pyogenes]
A002274_01	At1g35560	0.084	0.18	-0.657	0	-0.014	0.404	0.356	0.232	0.234	-1.045	0.493	0.419	0.324	0.359	0.446		0	-0.0814	0.330973		0.234	0.0362	0.609099		0.419	0.4082	0.0675404		At1g35560	TCP family transcription factor, putative similar to PCF2 (GI:2580440) and PCF1 (GI:2580438) [Oryza sativa]
A002279_01	At1g13880	0	0.141	-0.485	0.107	-0.027	0.145	0.133	0.033	0.142	-0.908	-0.072	0.108	0.061	0.088	-0.162		0	-0.0528	0.251667		0.133	-0.091	0.459082		0.061	0.0046	0.116674		At1g13880	ELM2 domain-containing protein contains Pfam profile: PF01448 ELM2 domain
A002280_01	At1g13910	-0.004	0.267	0.635	0	-0.129	-0.217	-0.126	-0.119	-0.275	0.107	-0.1	-0.1	0.303	0.359	0		0	0.1538	0.305327		-0.126	-0.126	0.145619		0	0.0924	0.222487		At1g13910	leucine-rich repeat family protein contains leucine rich-repeat (LRR) domains Pfam:PF00560, INTERPRO:IPR001611; contains similarity to Hcr2-0A [Lycopersicon esculentum] gi|3894385|gb|AAC78592
A002284_01	At1g17520	0.006	0.056	-0.622	-0.01	0	0.31	0.295	0.178	-0.19	-0.573	0.351	0.686	0.058	0.314	0.292		0	-0.114	0.285121		0.178	0.004	0.380512		0.314	0.3402	0.224912		At1g17520	DNA-binding protein, putative contains similarity to DNA-binding protein PcMYB1 [Petroselinum crispum] gi|2224899|gb|AAB61699
A002285_01	At1g17510	-0.164	0.165	0.847	-0.231	0	0.365	0.371	0.522	0.253	1.111	0.409	0.387	0.425	0.51	0.798		0	0.1234	0.432653		0.371	0.5244	0.341578		0.425	0.5058	0.169861		At1g17510	expressed protein
A002297_01	At1g12440	0	-0.117	-0.48	0.145	0.25	0.348	0.337	0.117	0.001	-0.127	0.709	0.765	0.094	0.187	0.645		0	-0.0404	0.282601		0.117	0.1352	0.208025		0.645	0.48	0.314538		At1g12440	zinc finger (AN1-like) family protein contains Pfam domains, PF01428: AN1-like Zinc finger and PF01754: A20-like zinc finger
A002307_01	At1g48620	-0.083	0	-0.633	0.402	0.638	0.011	0.069	-0.141	-0.243	-0.52	-0.026	0.272	-0.066	0.061	0.378		0	0.0648	0.48868		-0.141	-0.1648	0.233675		0.061	0.1238	0.192995		At1g48620	histone H1/H5 family protein weak similarity to HMG I/Y like protein [Glycine max] GI:15706274, HMG-I/Y protein HMGa [Triticum aestivum] GI:20502966; contains Pfam profiles PF00538: linker histone H1 and H5 family, PF02178: AT hook motif
A002308_01	At1g48605	0.01	-0.01	0.518		-0.276	0.439	0.374	0.541	0.528	0.806	0.3	0.497	0.685	0.725	0.51		0	0.0605	0.331692		0.528	0.5376	0.164795		0.51	0.5434	0.169957		At1g48605	halotolerance protein (HAL3B) contains Pfam PF02441: Flavoprotein; identical to Halotolerance protein Hal3b (SP:P94063)[Arabidopsis thaliana]
A002321_01	At1g75810	-0.124	0.129	-0.396	0.311	0	0.006	0.402	0.362	0.285	0.512	0.46	0.506	0.353	0.287	0.651		0	-0.016	0.266587		0.362	0.3134	0.190365		0.46	0.4514	0.141072		At1g75810	expressed protein
A002329_01	At1g20200	0	0	-0.305	0.119	0.178	-0.053	-0.111	0.016	0.063	-0.214	0.092	0.164	-0.095	0.036	0.459		0	-0.0016	0.186318		-0.053	-0.0598	0.108709		0.092	0.1312	0.206334		At1g20200	26S proteasome regulatory subunit S3, putative (RPN3) similar to SP:Q06364 from [Daucus carota]
A002330_01	At1g20100	0.455	0.476	-0.357	-0.013	0	0.775	0.567	0.281	1.085	0.701	0.556	0.686	0.543	0.805	0.336		0	0.1122	0.352943		0.701	0.6818	0.293873		0.556	0.5852	0.175504		At1g20100	expressed protein
A002338_01	At1g32360	-0.004	-0.021	0.146	0	0.07	0.088	-0.003	0.135	-0.023	0.205	0.18	0.148	0.171	0.066	0.237		0	0.0382	0.0696003		0.088	0.0804	0.0951462		0.171	0.1604	0.0621072		At1g32360	zinc finger (CCCH-type) family protein contains Pfam domain, PF00642: Zinc finger C-x8-C-x5-C-x3-H type (and similar)
A002340_01	At1g21170		-0.749	0.567	-0.37	0.37	-0.5	-0.55	-0.467	-0.193	0.78	-0.931		-0.452	-0.444	-0.208		0	-0.0455	0.618603		-0.467	-0.186	0.557507		-0.448	-0.50875	0.303402		At1g21170	expressed protein
A002345_01	At1g15880	0.002	0	-0.191	-0.223	0.139	-0.041	0.032	0.066	0.116	-1.045	0.218	0.239	0.173	0.084	0.312		0	-0.0546	0.150523		0.032	-0.1744	0.490017		0.218	0.2052	0.084319		At1g15880	Golgi SNARE 11 protein identical to Golgi SNARE 11 protein (GI:13898893) {Arabidopsis thaliana}; similar to putative cis-Golgi SNARE protein GI:2583133 from [Arabidopsis thaliana];similar toSP|O95249| 28 kDa Golgi SNARE protein (28 kDa cis-Golgi SNARE p28
A002347_01	At1g03700	-0.12	0	-0.269	0.188	0.828	-1.29	-1.077	-0.467	-0.393	0.475	-1.554	-1.559	-0.656	-0.855	-0.594		0	0.1254	0.426926		-0.467	-0.5504	0.69056		-0.855	-1.0436	0.47804		At1g03700	integral membrane family protein contains TIGRFAM TIGR01569 : plant integral membrane protein TIGR01569; contains Pfam PF04535 : Domain of unknown function (DUF588)
A002349_01	At1g22050	0	0.04	0.106	-0.367	-0.185	-0.482	-0.368	-0.394	-0.243	-0.412	-0.364	-0.465	-0.182	-0.08	-0.346		0	-0.0812	0.192862		-0.394	-0.3798	0.0873739		-0.346	-0.2874	0.154084		At1g22050	ubiquitin family protein contains INTERPRO:IPR000626 ubiquitin domain
A002353_01	At1g23230	-0.075	-0.034	0.034	0.526		-0.028	-0.088	0.15	0.249	0.553	0.101	0.15	0.178	0.002	0.372		0	0.11275	0.279143		0.15	0.1672	0.254489		0.15	0.1606	0.135841		At1g23230	expressed protein
A002356_01	At1g26690	-0.01	0.096	-0.164	0	0.401	0.085	-0.025	0.018	0.333	0.075	-0.213	0.064	-0.077	-0.074	0.316		0	0.0646	0.209849		0.075	0.0972	0.139148		-0.074	0.0032	0.200421		At1g26690	emp24/gp25L/p24 family protein similar to SP|P49755 Transmembrane protein Tmp21 precursor (21 kDa Transmembrane trafficking protein) {Homo sapiens}; contains Pfam profile PF01105: emp24/gp25L/p24 family
A002358_01	At1g22310	-0.118	0.042	0.614	-0.105	0	0.009	-0.004	-0.017	0.027	0.499	0.017	0.032	0.259	0.236	0.055		0	0.0866	0.302577		0.009	0.1028	0.222079		0.055	0.1198	0.117638		At1g22310	DNA-binding protein-related contains Pfam profiles PF02178: AT hook motif, PF01429: Methyl-CpG binding domain
A002359_01	At1g07110	-0.218	-0.019	0	0.241	0.091	-0.335	-0.237	-0.219	-0.481	-0.891	-0.098	-0.209	-0.13	-0.261	0.115		0	0.019	0.167662		-0.335	-0.4326	0.276534		-0.13	-0.1166	0.144528		At1g07110	fructose-6-phosphate 2-kinase / fructose-2,6-bisphosphatase (F2KP) identical to fructose-6-phosphate 2-kinase/fructose-2,6-bisphosphatase (F2KP) [Arabidopsis thaliana] GI:13096098
A002360_01	At1g22250	-0.52	0.312	0.757	-0.764	0	0.205	0.321	0.405	0.623	-0.04	-0.617	-0.045	-0.394	-0.139	-0.369		0	-0.043	0.615476		0.321	0.3028	0.245143		-0.369	-0.3128	0.22595		At1g22250	expressed protein
A002363_01	At1g09420	-0.12	-0.195	0	0.036	0.083	-0.071	-0.125	0.071	-0.256	-0.35	0.089	0.078	-0.147	-0.104	0.006		0	-0.0392	0.115029		-0.125	-0.1462	0.163455		0.006	-0.0156	0.106359		At1g09420	glucose-6-phosphate 1-dehydrogenase, putative / G6PD, putative similar to SP|Q43839 Glucose-6-phosphate 1-dehydrogenase, chloroplast precursor (EC 1.1.1.49) (G6PD) {Solanum tuberosum}; contains Pfam profiles PF02781: Glucose-6-phosphate dehydrogenase C-te
A002365_01	At1g21570	0.005	-0.106	-0.111	0.201	0	-0.315	-0.282	-0.261	-0.032	-0.081	-0.148	-0.198	-0.166	-0.23	-0.006		0	-0.0022	0.12645		-0.261	-0.1942	0.128342		-0.166	-0.1496	0.0861673		At1g21570	zinc finger (CCCH-type) family protein contains Pfam domain, PF00642: Zinc finger C-x8-C-x5-C-x3-H type (and similar)
A002367_01	At1g21480	0.217	0.01		-0.01	-0.015	0.111	0.063	0.357	-0.098	-2.128	0.154	0.365	0.135	0.299	-0.218		0	0.0505	0.111524		0.063	-0.339	1.0133		0.154	0.147	0.225857		At1g21480	exostosin family protein contains Pfam profile: PF03016 Exostosin family
A002369_01	At1g50670	0.123	0	0.358	-0.385	-0.259	0.024	0.009	0.045	0.154	-0.291	-0.207	-0.197	0.403	0.064	-0.363		0	-0.0326	0.297189		0.024	-0.0118	0.16612		-0.197	-0.06	0.300804		At1g50670	OTU-like cysteine protease family protein contains Pfam profile PF02338: OTU-like cysteine protease
A002370_01	At1g50620	0	0.106	0.499	-0.001	-0.396	0.049	0.138	0.01	-0.061	-0.164	-0.267	0.263	0.04	0.09	-0.199		0	0.0416	0.319531		0.01	-0.0056	0.114023		0.04	-0.0146	0.217194		At1g50620	PHD finger family protein contains Pfam domain, PF00628: PHD-finger
A002372_01	At1g50510	0	0.063	0.287	-0.036	-0.012	0.15	0.12	0.177	0.258	0.396	0.455	0.314	0.372	0.44	0.497		0	0.0604	0.13185		0.177	0.2202	0.11087		0.44	0.4156	0.0724521		At1g50510	indigoidine synthase A family protein similar to IndA protein (GI:7576263) [Erwinia chrysanthemi]; contains Pfam profile PF04227: Indigoidine synthase A like protein
A002376_01	At1g17780	-0.382	0.167	-0.142	0	0.131	0.056	-0.051	0.151	0.332	0.309	0.317	0.388	0.227	0.474	0.526		0	-0.0452	0.224122		0.151	0.1594	0.163708		0.388	0.3864	0.11978		At1g17780	expressed protein
A002378_01	At1g17930	0	0.074	0.649	-0.063	-0.426	0.303	0.346	0.198	0.101	0.08	0.119	0.385	0.279	0.346	0.075		0	0.0468	0.387676		0.198	0.2056	0.118293		0.279	0.2408	0.137518		At1g17930	expressed protein similar to hypothetical protein GI:4559351 from [Arabidopsis thaliana]
A002380_01	At1g17970	0	-0.025	-0.064	0.226	0.12	-0.588	-0.3	0.025	-0.517	-0.707	-0.49	-0.799	-0.203	-0.072	-0.225		0	0.0514	0.11936		-0.517	-0.4174	0.288268		-0.225	-0.3578	0.289575		At1g17970	zinc finger (C3HC4-type RING finger) family protein similar to Pfam domain, PF00097: Zinc finger, C3HC4 type (RING finger)
A002381_01	At1g17980		0.003	-0.049	0.266	-0.003	0.271	0.125	0.381	0.597	-0.662	0.232	0.419	0.345	0.351	0.241		0	0.05425	0.143065		0.271	0.1424	0.481532		0.345	0.3176	0.0795977		At1g17980	nucleotidyltransferase family protein contains Pfam profiles: PF01909 nucleotidyltransferase domain, PF04926 poly(A) polymerase predicted RNA binding domain
A002383_01	At1g33811	0.151	0.091	-0.035	-0.062	0	-0.489	-0.539	-0.385	-0.492	-1.115	-1.023	-0.722	-0.656	-0.802	-1.104		0	0.029	0.0893672		-0.492	-0.604	0.291151		-0.802	-0.8614	0.193726		At1g33811	GDSL-motif lipase/hydrolase family protein similar to family II lipases EXL3 GI:15054386, EXL1 GI:15054382, EXL2 GI:15054384 from [Arabidopsis thaliana]; contains Pfam profile PF00657: GDSL-like Lipase/Acylhydrolase
A002386_01	At1g18030	0	0.22	-0.142	0.058	-0.082	-0.091	0.025	0.524	0.399		0.154	0.467	0.409	0.166	0.225		0	0.0108	0.139704		0.212	0.21425	0.293865		0.225	0.2842	0.144412		At1g18030	protein phosphatase 2C, putative / PP2C, putative contains similarity to protein phosphatase 2C GI:3777604 from [Rattus norvegicus]
A002387_01	At1g24440	0	0.362	-0.417	-0.128	0.385	-0.14	-0.017	0.11	-0.085	-0.598	-0.009	0.313	0.147	0.322	0.438		0	0.0404	0.339625		-0.085	-0.146	0.269369		0.313	0.2422	0.174559		At1g24440	expressed protein similar to MTD2 [Medicago truncatula] GI:9294812
A002390_01	At1g24610	0.016	0	-0.146	-0.008	0.083	-0.311	-0.335	-0.233	-0.283	-0.437	-0.133	-0.208	-0.11	-0.236	-0.102		0	-0.011	0.0835464		-0.311	-0.3198	0.0757179		-0.133	-0.1578	0.0605161		At1g24610	SET domain-containing protein low similarity to SP|Q43088 Ribulose-1,5 bisphosphate carboxylase/oxygenase large subunit N- methyltransferase, chloroplast precursor (EC 2.1.1.127) {Pisum sativum}; contains Pfam profile PF00856: SET domain
A002399_01	At1g27310	-0.099	0.006	-0.797	0	0.181	0.189	0.332	0.229	0.174	0.021	0.452	0.381	0.352	0.253	0.454		0	-0.1418	0.379892		0.189	0.189	0.112359		0.381	0.3784	0.0830078		At1g27310	nuclear transport factor 2 (NTF2), putative similar to Swiss-Prot:P33331 nuclear transport factor 2 (NTF-2) (Nuclear transport factor P10) [Saccharomyces cerevisiae]
A002401_01	At1g47750	0	0.035	-0.316	-0.141	0.255	0.19	0.369	0.367	0.392	0.303	0.265	0.298	0.414	0.334	0.736		0	-0.0334	0.212373		0.367	0.3242	0.0819982		0.334	0.4094	0.190811		At1g47750	peroxisomal biogenesis factor 11 family protein / PEX11 family protein contains Pfam PF05648: Peroxisomal biogenesis factor 11 (PEX11)
A002404_01	At1g28280	0	-0.091	-0.065	0.17	0.384	0.046	-0.104	0.263	0.343	0.787	0.108	0.017	0.094	-0.092	0.538		0	0.0796	0.19823		0.263	0.267	0.340101		0.094	0.133	0.239923		At1g28280	VQ motif-containing protein contains PF05678: VQ motif
A002405_01	At1g28190	0.088	0.109	-0.303	0	-0.462	1.145	0.948	1.635	2.09	1.743	1.298	1.449	1.654	1.273	1.378		0	-0.1136	0.255124		1.635	1.5122	0.462428		1.378	1.4104	0.152802		At1g28190	expressed protein
A002408_01	At1g16960	-0.057	0.028	0.464	0	-0.191	-0.254	-0.42	0.009	-0.104	0.293	-0.579	-0.883	-0.459	-0.569	-0.592		0	0.0488	0.246933		-0.104	-0.0952	0.270346		-0.579	-0.6164	0.158186		At1g16960	expressed protein
A002410_01	At1g16930	-0.325	0.045	0			-0.533	0.032	0.002	0.089	0.772	-0.447	-0.492	-0.256	-0.172	-0.029		0	-0.0933333	0.201887		0.032	0.0724	0.464439		-0.256	-0.2792	0.1924		At1g16930	F-box family protein contains F-box domain Pfam:PF00646
A002413_01	At1g16870	0.084	0.127	-0.185	0	-0.014	0.313	0.068	0.105	0.207	-0.798	0.06	0.259	0.302	0.348	0.202		0	0.0024	0.119976		0.105	-0.021	0.444709		0.259	0.2342	0.111293		At1g16870	mitochondrial 28S ribosomal protein S29-related contains weak similarity to Swiss-Prot:P51398 mitochondrial 28S ribosomal protein S29 (MRP-S29, Death-associated protein 3, DAP-3) [Homo sapiens]
A002414_01	At1g67310		-0.105	0.284	-0.009	0.009	-0.702		0.012	-0.048	-0.172	-0.601	-0.522	-0.163	-0.455	-0.876		0	0.04475	0.167165		-0.11	-0.2275	0.32548		-0.522	-0.5234	0.257351		At1g67310	calmodulin-binding protein similar to anther ethylene-upregulated calmodulin-binding protein ER1 GI:11612392 from[Nicotiana tabacum]
A002417_01	At1g16730	0	0.125	-0.385	0.307	-0.021	-0.631	-0.713	-0.397	-0.416	-0.186	-0.104	-0.458	-0.401	-0.635	-0.489		0	0.0052	0.254168		-0.416	-0.4686	0.208483		-0.458	-0.4174	0.195329		At1g16730	expressed protein
A002425_01	At1g57540	0	-0.14	-0.278	0.001	0.241	-0.021	-0.031	-0.05	-0.154	0.602	0.275	0.309	-0.097	-0.062	0.734		0	-0.0352	0.192854		-0.031	0.0692	0.302522		0.275	0.2318	0.337068		At1g57540	expressed protein contains similarity to T-box domain GI:5931592 from (Cynops pyrrhogaster)
A002428_01	At1g34060	-0.019	0.046	-0.212	0.122	0	0.079	0.144	0.331	0.23	-0.469	0.349	0.425	0.274	0.313	-0.028		0	-0.0126	0.124007		0.144	0.063	0.312071		0.313	0.2666	0.173837		At1g34060	alliinase family protein contains Pfam profiles: PF04864 allinase C-terminal domain, PF04863 alliinase EGF-like domain
A002432_01	At1g53120	0	0.049	0.236	-0.359	-0.283	-0.28	-0.217	-0.447	-0.282	-0.723	-0.332	-0.237	-0.134	-0.193	-0.618		0	-0.0714	0.245753		-0.282	-0.3898	0.204836		-0.237	-0.3028	0.190449		At1g53120	RNA-binding S4 domain-containing protein
A002437_01	At1g75390	-0.304	0.55	1.213	0	-1.203	1.92	1.483	-0.015	0.882	0.525	0.816	0.624	0.672	0.693	0.244		0	0.0512	0.908348		0.882	0.959	0.765026		0.672	0.6098	0.216403		At1g75390	bZIP transcription factor family protein contains Pfam profile: PF00170 bZIP transcription factor
A002438_01	At1g75410	0	0.049	0.416	-0.158	-0.177	-0.543	-0.463	-0.227	0.005	-0.14	-0.165	-0.174	0.074	0.127	-0.355		0	0.026	0.23894		-0.227	-0.2736	0.226984		-0.165	-0.0986	0.197814		At1g75410	BEL1-like homeodomain 3 protein (BLH3) identical to BEL1-like homeodomain 3 (GI:13877515) [Arabidopsis thaliana]
A002441_01	At1g27100	0	-0.107	-1.539	0.032	0.164	0.181	-0.001	0.446	0.356	-1.443	0.499	0.284	0.435	0.264	-0.023		0	-0.29	0.704874		0.181	-0.0922	0.774299		0.284	0.2918	0.202096		At1g27100	expressed protein contains Pfam profile: PF04601 protein of unknown function (DUF569
A002446_01	At1g24764		0.011	0.054	-0.011	-0.564	-0.202	-0.02	-0.274	-0.387		-0.309	-0.448	-0.438	-0.218	-0.226		0	-0.1275	0.292249		-0.238	-0.22075	0.153977		-0.309	-0.3278	0.111091		At1g24764	expressed protein
A002454_01	At1g28680	0.093	0	0.066	-0.028	-0.157	-0.463	-0.524	-0.359	-0.234	-0.5	-0.561	-0.443	-0.319	-0.305	-0.713		0	-0.0052	0.0978555		-0.463	-0.416	0.119689		-0.443	-0.4682	0.171806		At1g28680	transferase family protein similar to elicitor inducible gene product EIG-I24 [Nicotiana tabacum] [gi:10798748]; contains Pfam transferase family domain PF00248
A002461_01	At1g06530	0	-0.133	-0.607	0.047	0.125	0.018	-0.117	-0.254	-0.139	-0.48	0.211	0.223	-0.09	-0.105	0.365		0	-0.1136	0.29131		-0.139	-0.1944	0.18661		0.211	0.1208	0.208349		At1g06530	myosin heavy chain-related similar to myosin heavy chain (GI:1408194) {Placopecten magellanicus}; similar to Myosin heavy chain, clone 203 (Fragment) (SP:P39922){Hydra attenuata}; contains one transmembrane domain
A002465_01	At1g31350	-0.184	0	-1.263	0.095	0.332	-0.578	-0.6	-0.468	-0.685	-1.605	-0.228	-0.308	-0.5	-0.543	-0.06		0	-0.204	0.620523		-0.6	-0.7872	0.463664		-0.308	-0.3278	0.198767		At1g31350	F-box family protein similar to hypothetical protein GB:AAF24593 GI:6692128 from [Arabidopsis thaliana] ; similar to SKP1 interacting partner 2 (SKIP2) TIGR_Ath1:At5g67250
A002471_01	At1g53200		0	0.629		-0.263	0.196	0.122	0.168	0.158	0.726	0.167	0.509	0.33	0.35	0.734		0	0.122	0.458344		0.168	0.274	0.254059		0.35	0.418	0.214188		At1g53200	expressed protein
A002476_01	At1g78020	-0.062	0	-0.778	0.422	0.065	-0.537	-0.804	-0.261	-0.429	-0.514	-0.594	-0.811	-0.711	-0.764	-0.596		0	-0.0706	0.437754		-0.514	-0.509	0.197318		-0.711	-0.6952	0.098075		At1g78020	senescence-associated protein-related similar to senescence-associated protein SAG102 (GI:22331931) [Arabidopsis thaliana]
A002480_01	At1g10660	0	0.349	-0.553	-0.404	0.014	-0.122	-0.217	-0.193	-0.312	-2.154	0	0.29	0.057	0.332	-0.252		0	-0.1188	0.360713		-0.217	-0.5996	0.871591		0.057	0.0854	0.236966		At1g10660	expressed protein
A002482_01	At1g64570	-0.164	-0.171	0.312	0	0.282	0.332	-0.102	-0.006	0.085	0.387	0.189	0.332	0.022	0.016	0.225		0	0.0518	0.234302		0.085	0.1392	0.212588		0.189	0.1568	0.136362		At1g64570	expressed protein
A002483_01	At1g76070	0.169	0	-0.542	-0.224	0.128	-0.502	-0.307	0.113	0.368	-0.376	-0.091	-0.247	0.04	-0.297	-0.121		0	-0.0938	0.293638		-0.307	-0.1408	0.366299		-0.121	-0.1432	0.133425		At1g76070	expressed protein
A002484_01	At1g76300	-0.207	0	0.232	0.035	-0.229	0.431	0.276	0.019	0.114	0.538	0.488	0.192	0.146	0.141	0.646		0	-0.0338	0.190149		0.276	0.2756	0.215036		0.192	0.3226	0.23085		At1g76300	small nuclear ribonucleoprotein D3, putative / snRNP core protein D3, putative / Sm protein D3, putative similar to SWISS-PROT:P43331 small nuclear ribonucleoprotein Sm D3 (snRNP core protein D3, Sm-D3) [Mouse]
A002488_01	At1g76110	0.177	0.129	-0.636	-0.09	0	-0.466	-0.229	-0.003	-0.489	-1.33	-0.616	-0.497	-0.241	-0.264	-0.657		0	-0.084	0.32607		-0.466	-0.5034	0.502635		-0.497	-0.455	0.194143		At1g76110	high mobility group (HMG1/2) family protein / ARID/BRIGHT DNA-binding domain-containing protein low similarity to high mobility group protein [Plasmodium falciparum] GI:790198; contains Pfam profiles PF00505: HMG (high mobility group) box, PF01388: ARID/B
A002490_01	At1g08250	0.055	-0.106	-1.094	0	0.358	-0.63	-0.78	-0.603	-0.627		-0.714	-0.402	-0.681	-0.509	-0.594		0	-0.1574	0.551223		-0.628	-0.66	0.0809074		-0.594	-0.58	0.127552		At1g08250	prephenate dehydratase family protein contains similarity to prephenate dehydratase GI:1008717 from [Amycolatopsis methanolica]
A002499_01	At1g18335	0	-0.051	0.775	-0.273	0.119	-0.143	-0.301	-0.327	-0.198	0.247	-0.415	-0.127	-0.069	-0.106	0.04		0	0.114	0.395896		-0.198	-0.1444	0.231266		-0.106	-0.1354	0.16903		At1g18335	GCN5-related N-acetyltransferase (GNAT) family protein contains Pfam profile PF00583: acetyltransferase, GNAT family
A002505_01	At1g49040	0.072	-0.172	0	0.528	-0.117	0.231	0.146	0.343	0.148	0.252	0.129	0.174	0.237	0.425	0.217		0	0.0622	0.277442		0.231	0.224	0.081936		0.217	0.2364	0.11333		At1g49040	stomatal cytokinesis defective / SCD1 protein (SCD1) contains Pfam PF02141: DENN (AEX-3) domain; contains Pfam PF00400: WD domain, G-beta repeat (8 copies); identical to stomatal cytokinesis defective [Arabidopsis thaliana] GI:19743728; supporting cDNA gi
A002506_01	At1g48970	-0.111	0.069	0	0.027	-0.379	-0.022	0.059	0.236	0.355	-0.639	0.061	0.367	0.441	0.237	-0.246		0	-0.0788	0.180558		0.059	-0.0022	0.385351		0.237	0.172	0.274616		At1g48970	eukaryotic translation initiation factor 2B family protein / eIF-2B family protein similar to guanine nucleotide exchange factor, eIF-2B, delta subunit [Mus musculus] GI:529428; contains Pfam profile PF01008: Initiation factor 2 subunit family
A002507_01	At1g48950	0	0.227	-0.058	-0.121	0.965	0.266	0.059	0.133	-0.093	-0.776	0.086	0.326	0.432		-0.134		0	0.2026	0.445961		0.059	-0.0822	0.408952		0.206	0.1775	0.253132		At1g48950	expressed protein
A002513_01	At1g19370		-0.177	0.075	-0.075	2.817	0.276	0.377	0.228	0.62	1.358	0.334	0.299	0.233	0.422	0.309		0	0.66	1.44172		0.377	0.5718	0.464779		0.309	0.3194	0.0684273		At1g19370	expressed protein
A002514_01	At1g19300	0.156	0	-0.37	0.232	-0.129	0.254	0.399	0.547	1.163	0.844	0.171	0.249	0.115	-0.029	0.383		0	-0.0222	0.239393		0.547	0.6414	0.364301		0.171	0.1778	0.153242		At1g19300	glycosyl transferase family 8 protein contains Pfam profile: PF01501 Glycosyl transferase family 8
A002522_01	At1g11090	0	-0.105	-0.263	0.161	0.139	0.164	0.069	-0.126	-0.131	-0.47	0.207	0.118	-0.157	-0.324	0.156		0	-0.0136	0.176431		-0.126	-0.0988	0.243304		0.118	-1.11022e-17	0.229529		At1g11090	hydrolase, alpha/beta fold family protein similar to monoglyceride lipase from [Homo sapiens] GI:14594904, [Mus musculus] GI:2632162; contains Pfam profile PF00561: hydrolase, alpha/beta fold family
A002523_01	At1g76810	0	-0.317	0.611	0.064	-0.318	0.308	0.173	0.044	0.488	0.855	0.046	0.042	0.199	0.231	0.153		0	0.008	0.380365		0.308	0.3736	0.315441		0.153	0.1342	0.0868948		At1g76810	eukaryotic translation initiation factor 2 family protein / eIF-2 family protein similar to IF2 protein [Drosophila melanogaster] GI:7108770; contains Pfam profile PF03144: Elongation factor Tu domain 2
A002525_01	At1g76650	0.018	0	-0.626	0.737	-0.448	2.576	1.052	3.517	2.968	3.385	3.377	0.025	2.626	0.184	-0.363		0	-0.0638	0.528138		2.968	2.6996	0.992449		0.184	1.1698	1.70471		At1g76650	calcium-binding EF hand family protein similar to regulator of gene silencing calmodulin-related protein GI:12963415 from [Nicotiana tabacum]; contains INTERPRO:IPR002048 calcium-binding EF-hand domain
A002534_01	At1g13690	-0.032	0.004	0.244	-0.107	0	0.347	0.416	0.155	0.043	0.393	0.466	0.433	0.158	0.241	0.471		0	0.0218	0.131955		0.347	0.2708	0.16365		0.433	0.3538	0.144619		At1g13690	RNA recognition motif (RRM)-containing protein contains Pfam profile: PF00076 RNA recognition motif
A002535_01	At1g07960	0.059	-0.124	0.106	-0.143	0	0.231	0.239	0.175	0.247	0.046	0.251	0.164	0.114	0.178	0.161		0	-0.0204	0.11007		0.231	0.1876	0.0840583		0.164	0.1736	0.0495308		At1g07960	thioredoxin family protein low similarity to protein disulfide isomerase 4 [Giardia intestinalis] GI:13489047; contains Pfam profile PF00085: Thioredoxin
A002540_01	At1g21710	0	0.172	0.763	-0.261	-0.214	0.05	-0.022	-0.055	0.162	0.395	-0.029	-0.01	0.363	0.514	0.034		0	0.092	0.413325		0.05	0.106	0.181726		0.034	0.1744	0.247984		At1g21710	8-oxoguanine-DNA glycosylase (OGG1) similar to SP|O15527 N-glycosylase/DNA lyase [Includes: 8-oxoguanine DNA glycosylase (EC 3.2.2.-); DNA-(apurinic or apyrimidinic site) lyase (EC 4.2.99.18) {Homo sapiens}; contains Pfam profiles PF00633: Helix-hairpin-h
A002542_01	At1g51140	0.021	0	0.057	-0.163	-0.339	-0.914	-1.226	-1.173	-1.355	-1.847	-1.365	-0.712		-0.984	-0.91		0	-0.0848	0.165246		-1.226	-1.303	0.343799		-0.947	-0.99275	0.273444		At1g51140	basic helix-loop-helix (bHLH) family protein contains Pfam profile: PF00010 helix-loop-helix DNA-binding domain
A002545_01	At1g77350	0	-0.045	0.329	-0.143	0.097	0.424	0.304	0.029	0.195	0.265	0.054	0.111	0.017	-0.154	0.286		0	0.0476	0.17944		0.265	0.2434	0.14583		0.054	0.0628	0.159153		At1g77350	expressed protein
A002549_01	At1g76970	0.367	0.16	-0.392	0	-0.458	1.392	1.053	1.325	1.899	0.991	0.919	1.188	0.981	0.977	0.895		0	-0.0646	0.35456		1.325	1.332	0.360298		0.977	0.992	0.11565		At1g76970	VHS domain-containing protein / GAT domain-containing protein weak similarity to HGF-regulated tyrosine kinase substrate [Mus musculus] GI:1089781; contains Pfam profiles PF00790: VHS domain, PF03127: GAT domain
A002557_01	At1g73250	0	-0.039	0.091	-0.306	0.169	0.019	-0.126	0.082	0.14	0.269	0.043	0.176	-0.194	0.033	0.187		0	-0.017	0.180661		0.082	0.0768	0.146143		0.043	0.049	0.153716		At1g73250	GDP-4-keto-6-deoxy-D-mannose-3,5-epimerase-4-reductase (GER1) identical to GDP-4-keto-6-deoxy-D-mannose-3,5-epimerase-4-reductase (GER1)GI:6016479 from [Arabidopsis thaliana]
A002558_01	At1g62250	0.206	0.104	-0.585	0	-0.033	-0.505	-0.411	-0.688	-0.509	-1.348	-0.447	-0.299	-0.389	-0.441	-0.714		0	-0.0616	0.307243		-0.509	-0.6922	0.380056		-0.441	-0.458	0.15491		At1g62250	expressed protein
A002560_01	At1g67190	0	-0.006	0.383	-0.104	0.099	0.101	-0.019	0.124	0.356	0.896	-0.349	-0.088	-0.244	-0.127	-0.086		0	0.0744	0.186859		0.124	0.2916	0.364121		-0.127	-0.1788	0.114846		At1g67190	F-box family protein
A002561_01	At1g55480	0.223	0	-0.286	-0.145	0.011	-0.723	-0.777	-0.674	-0.536	-1.61	-1.199	-1.111	-0.915	-0.986	-1.294		0	-0.0394	0.190335		-0.723	-0.864	0.426512		-1.111	-1.101	0.153927		At1g55480	expressed protein
A002568_01	At1g22570	-0.133	0	0.595	0.648	-0.717	1.411	1.305	1.52	1.694	2.536	2.041	1.372	1.982	1.434	1.464		0	0.0786	0.564539		1.52	1.6932	0.492607		1.464	1.6586	0.324527		At1g22570	proton-dependent oligopeptide transport (POT) family protein contains Pfam profile: PF00854 POT family
A002571_01	At1g70180	-0.013	0	0.277	0.33	-0.095	-0.118	-0.071	-0.098	-0.111	-0.226	-0.001	-0.024	-0.093	-0.187	0.165		0	0.0998	0.190409		-0.111	-0.1248	0.0593523		-0.024	-0.028	0.129904		At1g70180	sterile alpha motif (SAM) domain-containing protein contains Pfam profile PF00536: SAM domain (Sterile alpha motif)
A002572_01	At1g70190	-0.141	0.127	0	-0.032	0.04	0.309	0.23	0.283	0.121	-0.877	0.456	0.607	0.335	0.438	0.543		0	-0.0012	0.0982685		0.23	0.0132	0.502834		0.456	0.4758	0.104133		At1g70190	ribosomal protein L12 family protein contains similarity to ribosomal protein GI:7270590 from [Arabidopsis thaliana]
A002576_01	At1g70060	-0.109	0.071	-0.071	0.159		-0.118	-0.367	0.063	-0.025		0	0.076	0.176	0.024	-0.166		0	0.0125	0.124658		-0.071	-0.11175	0.185522		0.024	0.022	0.124964		At1g70060	paired amphipathic helix repeat-containing protein similar to transcription co-repressor Sin3 [Xenopus laevis] GI:4960210; contains Pfam profile PF02671: Paired amphipathic helix repeat
A002577_01	At1g70000	0.349	-0.093	-0.555	0	0.373	-0.617	-0.387	-0.28	-0.409	-0.838	-0.441	-0.45	-0.303	-0.77	-0.685		0	0.0148	0.379641		-0.409	-0.5062	0.222031		-0.45	-0.5298	0.192012		At1g70000	DNA-binding family protein contains Pfam domains, PF00249: Myb-like DNA-binding domain and PF00098: Zinc knuckle
A002578_01	At1g70150	0.001	0.238	-0.577	-0.334	0	0.18	0.265	0.071	0.02	-1.258	0.175	0.328	0.203	0.394	-0.319		0	-0.1344	0.320474		0.071	-0.1444	0.629757		0.203	0.1562	0.280367		At1g70150	zinc finger (MYND type) family protein contains Pfam profile PF01753: MYND finger
A002588_01	At1g22430	0	0.061	0.247	-0.338	-0.067	-0.728	-0.376	-0.73	-1.171	-1.776	-0.826	-0.444	-0.377	-0.327	-0.498		0	-0.0194	0.213062		-0.73	-0.9562	0.538072		-0.444	-0.4944	0.196416		At1g22430	alcohol dehydrogenase, putative similar to alcohol dehydrogenase ADH GI:7705214 from [Lycopersicon esculentum]; contains Pfam zinc-binding dehydrogenase domain PF00107
A002592_01	At1g05140	0.031	0.237	-0.414	-0.06	0	-0.373	-0.252	-0.074	-0.32	-0.839	-0.212	-0.142	0.141	-0.043	-0.358		0	-0.0412	0.236452		-0.32	-0.3716	0.284604		-0.142	-0.1228	0.186817		At1g05140	membrane-associated zinc metalloprotease, putative similar to Hypothetical zinc metalloprotease All3971 (SP:Q8YQ64) [strain PCC 7120] {Anabaena sp.}; Similar to Synechocystis hypothetical protein (gb|D90908);contains Pfam PF00595: PDZ domain (Also known a
A002596_01	At1g61260		0	-0.43		0.34	0.661	0.823	1.319	1.353	1.374	1.084	0.712	0.828	0.542	0.37		0	-0.03	0.385876		1.319	1.106	0.337756		0.712	0.7072	0.272759		At1g61260	expressed protein contains similarity to cotton fiber expressed protein 1 [Gossypium hirsutum] gi|3264828|gb|AAC33276
A002599_01	At1g78600	0	-0.026	0.66	-0.098	0.21	0.266	0.72	0.519	1.077	1.321	0.475	0.022	0.555	0.413	0.289		0	0.1492	0.307684		0.72	0.7806	0.423322		0.413	0.3508	0.207919		At1g78600	zinc finger (B-box type) family protein similar to zinc finger protein GI:3618316 from [Oryza sativa]
A002600_01	At1g41750	0.266	0	1.021	-0.247	-0.15	0.379	0.063	0.302	0.679	0.903	-0.578	-0.105	-0.295	-0.086	-0.362		0	0.178	0.509482		0.379	0.4652	0.329093		-0.295	-0.2852	0.20241		At1g41750	hypothetical protein
A002605_01	At1g34010	0.019	-0.014	-0.573	0.118	0	-0.141	-0.007	-0.264	-0.292	-0.223	-0.053	-0.043	-0.46	-0.353	-0.09		0	-0.09	0.274914		-0.223	-0.1854	0.11484		-0.09	-0.1998	0.19324		At1g34010	expressed protein
A002608_01	At1g30120	0	-0.139	-0.003	0.393	0.093	-0.508	-0.502	-0.286	-0.094	0.085	-0.553	-0.828	-0.598	-0.513	-0.294		0	0.0688	0.199224		-0.286	-0.261	0.258515		-0.553	-0.5572	0.191209		At1g30120	pyruvate dehydrogenase E1 component beta subunit, chloroplast identical to pyruvate dehydrogenase E1 beta subunit [Arabidopsis thaliana] GI:2454184; identical to cDNA pyruvate dehydrogenase E1 beta subunit mRNA, nuclear gene encoding plastid protein GI:24
A002609_01	At1g19220	-0.018	0.063	1.106	0	-0.218	-0.306	-0.416	0.134	-0.182	0.538	-0.24	-0.264	-0.117	-0.064	-0.472		0	0.1866	0.524632		-0.182	-0.0464	0.386151		-0.24	-0.2314	0.158221		At1g19220	transcriptional factor B3 family protein / auxin-responsive factor AUX/IAA-related contains Pfam profile: PF02309 AUX/IAA family
A002621_01	At1g76280	-0.122	0.046	0.227	0	-0.248	-0.358	-0.295	-0.269	-0.459	-0.128	-0.411	-0.109	-0.001	0.12	-0.446		0	-0.0194	0.178991		-0.295	-0.3018	0.121654		-0.109	-0.1694	0.250318		At1g76280	pentatricopeptide (PPR) repeat-containing protein contains Pfam profile PF01535: PPR repeat
A002623_01	At1g12420	0.056	0	0.101	-0.257	-0.367	0.191	-0.003	-0.001	0.255	-0.255	-0.345	-0.242	-0.388	-0.063	-0.647		0	-0.0934	0.206432		-0.001	0.0374	0.199717		-0.345	-0.337	0.213814		At1g12420	ACT domain-containing protein (ACR8) contains Pfam ACT domain PF01842
A002627_01	At1g12500	0	-0.141	-0.362	0.25	0.218	-0.564	-0.335	-0.381	-0.459	-0.843	-0.431	-0.559	-0.67	-0.752	-0.654		0	-0.007	0.255296		-0.459	-0.5164	0.202155		-0.654	-0.6132	0.122771		At1g12500	phosphate translocator-related low similarity to glucose-6-phosphate/phosphate-translocator precursor [Zea mays] GI:2997589, phosphoenolpyruvate/phosphate translocator precursor [Mesembryanthemum crystallinum] GI:9295275, SP|P21727|CPTR_PEA Triose phospha
A002632_01	At1g12580	0.065	-0.08	0.199	0	-0.07	0.302	0.219	0.1	0.078	-0.286	0.252	0.154	0.082	-0.103	0.058		0	0.0228	0.114594		0.1	0.0826	0.225239		0.082	0.0886	0.131022		At1g12580	protein kinase family protein contains protein kinase domain, Pfam:PF00069; contains similarity to calcium-dependent protein kinase GI:5162877 from [Marchantia polymorpha]
A002634_01	At1g73670	0.049	-0.001	0.542	0	-0.334	-0.278	-0.36	-0.218	0.392	0.584	-0.636	-0.62	-0.257	-0.213	-1.061		0	0.0512	0.314092		-0.218	0.024	0.431928		-0.62	-0.5574	0.343715		At1g73670	mitogen-activated protein kinase, putative / MAPK, putative (MPK15) similar to mitogen-activated protein kinase GB:A56042 [Dictyostelium discoideum]; mitogen-activated protein kinase (MAPK)(AtMPK15), PMID:12119167; contains Pfam profile: PF00069 Eukaryoti
A002638_01	At1g78930	-0.085	0.07	0.765	0	-0.526	-0.149	-0.102	-0.317	-0.631	0.425	0.414	0.326	0.534	0.57	0.154		0	0.0448	0.464756		-0.149	-0.1548	0.384729		0.414	0.3996	0.168109		At1g78930	mitochondrial transcription termination factor-related / mTERF-related contains Pfam profile PF02536: mTERF
A002641_01	At1g12350	0	0.097	-0.541	-0.236	0.093	-0.186	-0.122	-0.104	-0.007	-0.986	0.135	0.216	-0.011	0.299	0.164		0	-0.1174	0.272728		-0.122	-0.281	0.399292		0.164	0.1606	0.114387		At1g12350	DNA/panthothenate metabolism flavoprotein family protein contains Pfam domain PF04127: DNA / pantothenate metabolism flavoprotein
A002642_01	At1g73170	-0.058	-0.037	0.218	0.235	0	-0.629	-0.642	-0.647	-0.526	-0.415	-0.681	-0.793	-0.56	-0.465	-0.66		0	0.0716	0.143046		-0.629	-0.5718	0.100671		-0.66	-0.6318	0.124678		At1g73170	expressed protein
A002644_01	At1g73530	0.326	-0.064	-0.184	0	0.314	-0.094	-0.158	-0.212	-0.183	0.059	-0.32	-0.205	-0.462	-0.493	-0.06		0	0.0784	0.230267		-0.158	-0.1176	0.107895		-0.32	-0.308	0.180415		At1g73530	RNA recognition motif (RRM)-containing protein low similarity to SP|Q03251 Glycine-rich RNA-binding protein 8 (CCR1 protein) {Arabidopsis thaliana}; contains InterPro entry IPR000504: RNA-binding region RNP-1 (RNA recognition motif) (RRM)
A002646_01	At1g72710	0	-0.07	-0.642	0.268	0.061	0.129	0.119	0.083	-0.255	-0.511	0.374	0.444	-0.075	0.006	0.216		0	-0.0766	0.34032		0.083	-0.087	0.285479		0.216	0.193	0.225324		At1g72710	casein kinase, putative similar to casein kinase I, delta isoform [Arabidopsis thaliana] SWISS-PROT:P42158
A002647_01	At1g12330	-0.192	0	-0.645	0.321	0.242	0.03	-0.014	-0.204	-0.55	-0.587	-0.49	-0.445	-0.874	-0.369	-0.208		0	-0.0548	0.38713		-0.204	-0.265	0.290971		-0.445	-0.4772	0.246387		At1g12330	expressed protein
A002648_01	At1g11890	0.258	-0.041	0.04	-0.221	0	0.55	0.372	0.258	0.69	0.387	0.236	0.264	0.278	0.136	0.02		0	0.0072	0.172066		0.387	0.4514	0.169195		0.236	0.1868	0.108514		At1g11890	vesicle transport protein SEC22, putative identified as SEC22 by Raikhel, NV, et al. in Plant Physiol. 124: 1558-69 (2000); similar to vesicle trafficking protein gb|U91538 from Mus musculus; ESTs gb|F15494 and gb|F14097 come from this gene
A002650_01	At1g70420	-0.152	0	-0.325	0.347	0.205	-0.174	0.19	0.245	-0.063	-0.438	0.249	0.283	0.099	0.308	0.429		0	0.015	0.269276		-0.063	-0.048	0.2787		0.283	0.2736	0.11886		At1g70420	expressed protein
A002651_01	At1g70410	0.147	0	-0.769	-0.051	0.062	-0.688	-0.565	-0.243	-0.319	-2.391	-0.796	-0.671	-0.495	-0.652	-0.796		0	-0.1222	0.369036		-0.565	-0.8412	0.884897		-0.671	-0.682	0.124481		At1g70410	carbonic anhydrase, putative / carbonate dehydratase, putative similar to SP|P42737 Carbonic anhydrase 2 (EC 4.2.1.1) (Carbonate dehydratase 2) {Arabidopsis thaliana}; contains Pfam profile PF00484: Carbonic anhydrase
A002659_01	At1g73430	0	-0.045	0.209	0.211	-0.111	-0.055	0.059	-0.076	0.143	0.17	-0.092	-0.127	0.07	0.119	-0.08		0	0.0528	0.148836		0.059	0.0482	0.11182		-0.08	-0.022	0.109126		At1g73430	sec34-like family protein contains Pfam PF04136: Sec34-like family profile; similar to Conserved oligomeric Golgi complex component 3 (Vesicle docking protein SEC34 homolog) (p94) (Swiss-Prot:Q96JB2) [Homo sapiens]
A002660_01	At1g72640	0.212	0	-0.791	-0.123	0.346	-0.246	-0.036	-0.137	-0.57	-1.254	-0.187	-0.017	-0.446	-0.389	-0.319		0	-0.0712	0.441623		-0.246	-0.4486	0.492896		-0.319	-0.2716	0.172063		At1g72640	expressed protein
A002662_01	At1g72550	0	-0.104	0.148	0.055	0	0.137	0.073	-0.088	-0.262	-0.212	0.101	0.068	-0.081	0.077	0.168		0	0.0198	0.0919032		-0.088	-0.0704	0.173673		0.077	0.0666	0.0913252		At1g72550	tRNA synthetase beta subunit family protein contains Pfam profiles: PF03484 phenylalanine-tRNA synthetase, B5 domain, PF03483 B3/4 domain; an isoform contains a non-consensus TG acceptor splice site at a terminal exon.
A002664_01	At1g20410	-0.047	0	0.19	0.03	-0.631	0.106	-0.521	-0.136	-0.164	0.272	0.074	-0.003	0.218	0.4	-0.152		0	-0.0916	0.314411		-0.136	-0.0886	0.301166		0.074	0.1074	0.21121		At1g20410	expressed protein
A002670_01	At1g09160	0.202	-0.085	-0.616	0	0.244	-0.095	-0.042	-0.24	-0.165	-1.012	-0.411	-0.318	-0.505	-0.465	-0.26		0	-0.051	0.344244		-0.165	-0.3108	0.398991		-0.411	-0.3918	0.101684		At1g09160	protein phosphatase 2C-related / PP2C-related similar to GB:AAC16260
A002674_01	At1g67900	0.095	-0.054	-0.394	0	0.216	-0.569	-0.477	0.254	-0.243	0.099	-0.835	-0.775	-0.603	-0.771	-0.316		0	-0.0274	0.229172		-0.243	-0.1872	0.356874		-0.771	-0.66	0.210806		At1g67900	phototropic-responsive NPH3 family protein contains NPH3 family domain, Pfam:PF03000
A002675_01	At1g23400	0.021	-0.2	0.159	-0.102	0	-0.67	-0.412	-0.397	-0.61	-0.283	-0.616	-0.587	-0.499	-0.577	-0.294		0	-0.0244	0.135231		-0.412	-0.4744	0.160597		-0.577	-0.5146	0.130695		At1g23400	expressed protein
A002677_01	At1g61890	0.039	0	-0.273	0.307	-0.232	-0.334	-0.848	-0.68	0.004	-1.274	-0.529	-1.369	-0.471	-1.055	-1.284		0	-0.0318	0.234023		-0.68	-0.6264	0.488433		-1.055	-0.9416	0.419664		At1g61890	MATE efflux family protein similar to ripening regulated protein DDTFR18 [Lycopersicon esculentum] GI:12231296; contains Pfam profile PF01554: Uncharacterized membrane protein family
A002678_01	At1g61990	-0.314	0.062	0.549	0	-0.541	-0.065	-0.172	-0.229	0.238	0.466	-0.104	-0.145	0.216	0.182	0.002		0	-0.0488	0.413707		-0.065	0.0476	0.295263		0.002	0.0302	0.163604		At1g61990	mitochondrial transcription termination factor-related / mTERF-related contains Pfam profile PF02536: mTERF
A002687_01	At1g77250	0.09	0	0.684	-0.241	-0.204	0.01	-0.109	0.198	0.393	0.744	-0.094	-0.306	0.137	0.049	-0.151		0	0.0658	0.372157		0.198	0.2472	0.336761		-0.094	-0.073	0.173059		At1g77250	PHD finger family protein contains Pfam domain, PF00628: PHD-finger
A002691_01	At1g75940	-1.672	1.306	3.085	-1.306		5.784	2.365	-3.424	-0.222	-0.118	0.761	1.25	-1.486	-0.764	-1.414		0	0.35325	2.25277		-0.118	0.877	3.42743		-0.764	-0.3306	1.26357		At1g75940	glycosyl hydrolase family 1 protein / anther-specific protein ATA27 contains Pfam PF00232 : Glycosyl hydrolase family 1 domain; TIGRFAM TIGR01233: 6-phospho-beta-galactosidase; identical to anther-specific protein ATA27 (GI:2746341) [Arabidopsis thaliana]
A002694_01	At1g33960	0.03	0	-0.092	0.057	-0.648	0.1	0.06	0.252	0.887	-0.297	-0.078	-0.217	0.211	-0.029	-0.345		0	-0.1306	0.294633		0.1	0.2004	0.433382		-0.078	-0.0916	0.209528		At1g33960	avirulence-responsive protein / avirulence induced gene (AIG1) identical to AIG1 (exhibits RPS2- and avrRpt2-dependent induction early after infection with Pseudomonas) SP:U40856 [Arabidopsis thaliana] (Plant Cell 8 (2), 241-249 (1996))
A002695_01	At1g56340	0.4	0.039	-0.585	0	-0.162	0.891	0.262	0.501	0.937	-0.265	-0.153	-0.009	-0.04	0.222	0.031		0	-0.0616	0.357427		0.501	0.4652	0.49489		-0.009	0.0102	0.136761		At1g56340	calreticulin 1 (CRT1) identical to calreticulin (crt1) GI:2052379 [Arabidopsis thaliana]
A002696_01	At1g55510	0	0.319	-0.208	-0.141	0.372	0.683	0.607	0.795	0.288	-0.447	1.291	0.922	0.582	0.737	1.011		0	0.0684	0.264527		0.607	0.3852	0.501951		0.922	0.9086	0.270652		At1g55510	2-oxoisovalerate dehydrogenase, putative / 3-methyl-2-oxobutanoate dehydrogenase, putative / branched-chain alpha-keto acid dehydrogenase E1 beta subunit, putative strong similarity to branched chain alpha-keto acid dehydrogenase E1 beta subunit [Arabidop
A002698_01	At1g54740	0	0.038	-0.647	-0.186	0.269	-0.299	0.112	0.231	-0.574	-1.668	0.663	0.556	0.06	0.279	0.262		0	-0.1052	0.343393		-0.299	-0.4396	0.758414		0.279	0.364	0.243059		At1g54740	expressed protein
A002699_01	At1g54850	0	0.027	-0.335	-0.12	0.095	0.22	0.192	0.068	0.015	-0.281	0.124	0.126	-0.051	-0.084	0.255		0	-0.0666	0.168968		0.068	0.0428	0.199947		0.124	0.074	0.140137		At1g54850	expressed protein contains similarity to LMW heat shock protein GI:2326354 from (Arabidopsis thaliana)
A002702_01	At1g15100	0	-0.155	-0.484	0.219	0.134	0.051	0.026	-0.278	-0.156	-0.234	0.244	0.216	-0.213	-0.114	0.399		0	-0.0572	0.277416		-0.156	-0.1182	0.149831		0.216	0.1064	0.258434		At1g15100	zinc finger (C3HC4-type RING finger) family protein contains Pfam profile: PF00097 zinc finger, C3HC4 type (RING finger)
A002704_01	At1g23490	0.088	-0.233	0.07	-0.204	0	0.63	0.552	0.805	0.947	0.911	0.547	0.095	0.463	0.335	0.431		0	-0.0558	0.152464		0.805	0.769	0.172883		0.431	0.3742	0.173537		At1g23490	ADP-ribosylation factor identical to SP:Q9SRC3 ADP-ribosylation factor 1-like [Arabidopsis thaliana], ADP-ribosylation factor GI:166586 [Arabidopsis thaliana]
A002706_01	At1g03190	0	-0.175	0.025	0.088	-0.102	-0.543	-0.257	-0.247	-0.236	-0.43	-0.217	-0.173	-0.1	-0.013	-0.371		0	-0.0328	0.104903		-0.257	-0.3426	0.137504		-0.173	-0.1748	0.134213		At1g03190	DNA repair protein / transcription factor protein (UVH6) identical to DNA repair/transcription factor protein (UVH6) gi:22651569 gb:AY090788
A002708_01	At1g03250	0.28	0.167	-0.413	-0.073	0	0.018	-0.025	0.306	0.203	-0.846	0.18	-0.058	0.058	0.107	0.036		0	-0.0078	0.265463		0.018	-0.0688	0.454929		0.058	0.0646	0.0880443		At1g03250	expressed protein
A002709_01	At1g20030		-0.349	0.166	-0.166	1.118	-0.435	-0.183	0.222	-0.255	0.709	-0.574	-0.691	-0.33	-0.262	0.274		0	0.19225	0.652941		-0.183	0.0116	0.457993		-0.33	-0.3166	0.373631		At1g20030	pathogenesis-related thaumatin family protein similar to receptor serine/threonine kinase PR5K [Arabidopsis thaliana] GI:1235680; contains Pfam profile PF00314: Thaumatin family
A002712_01	At1g32220	0.201	0	0.237	-0.024	-0.09	-0.682	-0.679	-0.334	-0.119	-0.56	-0.951	-1.169	-0.683	-0.819	-1.189		0	0.0648	0.14513		-0.56	-0.4748	0.244083		-0.951	-0.9622	0.219539		At1g32220	expressed protein
A002718_01	At1g06890	-0.052	0.171	-0.457	0	0.171	0.161	0.243	0.086	-0.008	-0.541	0.412	0.271	0.129	0.278	0.791		0	-0.0334	0.257127		0.086	-0.0118	0.310006		0.278	0.3762	0.252566		At1g06890	transporter-related low similarity to SP|Q9NTN3 UDP-glucuronic acid/UDP-N-acetylgalactosamine transporter {Homo sapiens}, SP|Q95YI5 UDP-sugar transporter UST74c {Drosophila melanogaster}, SP|Q18779 UDP-sugar transporter sqv-7 {Caenorhabditis elegans}; con
A002721_01	At1g78790	0.068	-0.024	-0.298	0	0.264	-0.397	-0.347	-0.209	-0.367	-0.293	-0.161	-0.387	-0.215	-0.313	0.115		0	0.002	0.202287		-0.347	-0.3226	0.0739649		-0.215	-0.1922	0.192617		At1g78790	expressed protein
A002722_01	At1g66230	0.189	-0.363	0.29	-0.49	0	-0.849	-0.776	-0.009	-0.154	-0.636	-0.646	-0.866	-0.647	-0.611	-0.578		0	-0.0748	0.340483		-0.636	-0.4848	0.379511		-0.646	-0.6696	0.11343		At1g66230	myb family transcription factor (MYB20) similar to myb-related transcription factor GI:1430846 from [Lycopersicon esculentum]; contains PFAM profile: Myb DNA binding domain PF00249
A002724_01	At1g48050	0	0.005	0.835	-0.097	-0.25	0.04	-0.094	-0.247	-0.176	-0.351	-0.329	0.067	-0.069	0.038	-0.454		0	0.0986	0.424426		-0.176	-0.1656	0.148749		-0.069	-0.1494	0.231003		At1g48050	Ku80 family protein identical to Ku80-like protein [Arabidopsis thaliana] GI:12006422; contains Pfam profiles: PF02197 Regulatory subunit of type II PKA R-subunit, PF02735: Ku70/Ku80 beta-barrel domain, PF03731: Ku70/Ku80 N-terminal alpha/beta domain, PF0
A002725_01	At1g56345	0.312	0	0.018	-0.164	-0.164	0.122	0.317	0.426	0.32	0.177	-0.26	-0.172	-0.103	-0.287	-0.346		0	0.0004	0.194589		0.317	0.2724	0.122034		-0.26	-0.2336	0.0962201		At1g56345	pseudouridine synthase family protein low similarity to SP|P23851 Ribosomal large subunit pseudouridine synthase C (EC 4.2.1.70) (Pseudouridylate synthase) (Uracil hydrolyase) {Escherichia coli}; contains Pfam profile PF00849: RNA pseudouridylate synthase
A002728_01	At1g11350	0	-0.16	0.938	-0.144	0.013	-0.754	-0.201	0.212	0.383	0.762	-0.543	-0.702	-0.236	0.005	-0.303		0	0.1294	0.458974		0.212	0.0804	0.580705		-0.303	-0.3558	0.27487		At1g11350	S-locus lectin protein kinase family protein contains Serine/Threonine protein kinases active-site signature, PROSITE:PS00108
A002729_01	At1g23480	0.288	-0.334	0	-0.03	0.281	0.041	0.282	0.415	0.173	-0.17	-0.237	-0.679	-0.246	-0.364	-0.163		0	0.041	0.257855		0.173	0.1482	0.224968		-0.246	-0.3378	0.203867		At1g23480	glycosyl transferase family 2 protein similar to cellulose synthase from Agrobacterium tumeficiens [gi:710492] and Agrobacterium radiobacter [gi:710493]; contains Pfam glycosyl transferase, group 2 family protein domain PF00535 isoform contains GG accepto
A002732_01	At1g73680	-0.12	0	-0.733	0.6	0.238	-0.081	-0.113	0.128	-0.256	0.05	0.342	0.205	0.097	0.304	0.828		0	-0.003	0.492008		-0.081	-0.0544	0.149125		0.304	0.3552	0.280875		At1g73680	pathogen-responsive alpha-dioxygenase, putative similar to pathogen-inducible alpha-dioxygenase [Nicotiana attenuata] GI:12539609; contains Pfam profile PF03098: Animal haem peroxidase
A002733_01	At1g15400	-0.117	0	-0.565	0.13	0.262	-0.073	-0.12	-0.235	-0.281	-0.334	0.201	0.212	-0.121	-0.068	0.257		0	-0.058	0.316875		-0.235	-0.2086	0.109432		0.201	0.0962	0.176343		At1g15400	expressed protein ESTs gb|H37295 and gb|R64895 come from this gene
A002735_01	At1g55680	-0.054	0.01	0.328	0	-0.007	-0.017	-0.074	-0.085	-0.066	0.258	0.019	0.052	0.187	0.157	-0.262		0	0.0554	0.154356		-0.066	0.0032	0.144792		0.052	0.0306	0.177936		At1g55680	WD-40 repeat family protein contains 2 (1 significant) WD-40 repeats (PF0400); similar to Trp-Asp repeat protein (PIR:T40094) [Schizosaccharomyces]
A002736_01	At1g29760	-0.15	0.049	0.322	-0.353	0	-0.369	-0.397	-0.257	0.036	0.201	-0.165	-0.195	-0.008	0.059	-0.352		0	-0.0264	0.249855		-0.257	-0.1572	0.263608		-0.165	-0.1322	0.162261		At1g29760	expressed protein
A002741_01	At1g72610	0.418	-0.315	-0.276	0	0.358	0.334	0.684	0.365	0.39	0.589	0.317	0.379	0.365	0.191	0.922		0	0.037	0.343309		0.39	0.4724	0.154798		0.365	0.4348	0.282252		At1g72610	germin-like protein (GER1) identical to germin-like protein subfamily 3 member 1 SP|P94040; contains Pfam profile: PF01072 Germin family
A002742_01	At1g74950	0.067	0	-0.564	0.056	-0.193	0.171	-0.201	0.172	0.624	-0.449	0.014	-0.014	0.2	-0.013	0.082		0	-0.1268	0.265791		0.171	0.0634	0.4093		0.014	0.0538	0.0905715		At1g74950	expressed protein
A002744_01	At1g03970	0.044	0	-0.454	0.106	-0.012	0.299	0.291	0.326	0.248	-0.555	0.447	0.596	0.273	0.168	0.406		0	-0.0632	0.223305		0.291	0.1218	0.379378		0.406	0.378	0.164464		At1g03970	G-box binding factor 4 (GBF4) identical to G-box binding factor 4 (GBF4) SP:P42777 from [Arabidopsis thaliana]
A002746_01	At1g03420	0	-0.05	-0.275	0.001	0.161	-0.355	-0.46	0.177	0.038	0.305	-0.21	-0.332	-0.132	0.087	0.111		0	-0.0326	0.157109		0.038	-0.059	0.333923		-0.132	-0.0952	0.191261		At1g03420	expressed protein similar to gb|T45484, emb|Z30724, and emb|Z30531
A002747_01	At1g30300	-0.059	0.162	0.059	-0.376		0.402	0.341	0.304	0.229		0.046	0.31	0.205	0.342	-0.258		0	-0.0535	0.23319		0.322	0.319	0.0723372		0.205	0.129	0.245237		At1g30300	expressed protein similar to putative hydrolase GI:7270684 from [Arabidopsis thaliana]; similar to PhnP protein (GI:15620485) [Rickettsia conorii]
A002749_01	At1g03760	0.146	0.244	0	-0.078	-0.313	0.743	0.342	0.121	0.228	0.353	0.508	0.621	0.1	0.563	0.506		0	-0.0002	0.215003		0.342	0.3574	0.235358		0.508	0.4596	0.206488		At1g03760	prefoldin subunit family protein contains similarity to Swiss-Prot:O94763 RNA polymerase II subunit 5-mediating protein (RPB5-mediating protein) [Homo sapiens]; contains Pfam profile PF02996: Prefoldin subunit
A002750_01	At1g17720	0	0.074	0.314	-0.168	-0.206	-0.065	-0.172	-0.033	0.021	0.145	0.01	-0.131	0.209	0.214	-0.037		0	0.0028	0.208981		-0.033	-0.0208	0.116405		0.01	0.053	0.153348		At1g17720	serine/threonine protein phosphatase 2A (PP2A) 55 kDa regulatory subunit B identical to type 2A protein serine/threonine phosphatase 55 kDa B regulatory subunit (GI:1408460) [Arabidopsis thaliana]; similar to 55 kDa B regulatory subunit of phosphatase 2A
A002760_01	At1g04280	0	-0.116	-0.019	0.002	0.377	-0.359	-0.139	-0.038	-0.529	-0.476	-0.019	-0.044	-0.33	-0.14	-0.011		0	0.0488	0.189765		-0.359	-0.3082	0.212795		-0.044	-0.1088	0.133913		At1g04280	expressed protein
A002762_01	At1g52880	0	-0.17	-0.69	0.339	0.057	-0.329	-0.359	-0.358	-0.304	0.03	-0.002	-0.113	-0.14	-0.27	-0.238		0	-0.0928	0.380825		-0.329	-0.264	0.165923		-0.14	-0.1526	0.106634		At1g52880	no apical meristem (NAM) family protein contains Pfam PF02365: No apical meristem (NAM) domain; similar to NAM (no apical meristem) GB:CAA63101 from [Petunia x hybrida]; identical to cDNA NAC domain protein GI:4325285
A002771_01	At1g04390		-0.221	0.041	-0.041	0.108	-0.666	-0.553	-0.339	-0.003	0.401	-0.358	-0.512	-0.118	-0.104	-0.565		0	-0.02825	0.142214		-0.339	-0.232	0.434734		-0.358	-0.3314	0.215141		At1g04390	expressed protein
A002772_01	At1g17470	-0.015	0.174	0.712	0	-0.133	-0.071	-0.023	0.039	-0.015	0.261	-0.047	-0.158	0.044	0.359	-0.101		0	0.1476	0.333993		-0.015	0.0382	0.130519		-0.047	0.0194	0.203905		At1g17470	developmentally regulated GTP-binding protein (DRG1) identical to developmentally regulated GTP binding protein (DRG1) [Arabidopsis thaliana] GI:2345150
A002773_01	At1g57610	-0.152	0	0.399	0.017	-0.158	0.407	0.47	0.216	0.757	1.147	0.01	0.121	0.239	0.189	0.005		0	0.0212	0.226556		0.47	0.5994	0.362444		0.121	0.1128	0.104868		At1g57610	expressed protein contains Pfam domain, PF04678: Protein of unknown function, DUF607
A002774_01	At1g61790	0.28	0.272	-0.162	-0.209	0	0.225	0.173	0.377	0.347	0.211	0.085	0.237	0.399	0.486	0.05		0	0.0362	0.232248		0.225	0.2666	0.0897708		0.237	0.2514	0.190579		At1g61790	OST3/OST6 family protein weak similarity to SP|Q13454 N33 protein {Homo sapiens}; contains Pfam profile PF04756: OST3 / OST6 family
A002775_01	At1g22790	0	-0.262	-0.773	0.044	0.059	0.099	-0.021	-0.18	-0.288	-0.03	-0.235	-0.084	-0.357	-0.384	-0.13		0	-0.1864	0.352798		-0.03	-0.084	0.151002		-0.235	-0.238	0.133103		At1g22790	expressed protein identical to hypothetical protein GB:CAA72910
A002777_01	At1g04910	0	-0.09	0.212	-0.016	0.079	0.079	0.113	0.024	0.011	-0.141	-0.015	0.235	-0.045	0.099	0.117		0	0.037	0.114778		0.024	0.0172	0.0976074		0.099	0.0782	0.112237		At1g04910	expressed protein contains Pfam PF03138: Plant protein family. The function of this family of plant proteins is unknown; previously annotated as 'growth regulator protein' based on similarity to axi 1 protein (GB:X80301) (GI:559920) from [Nicotiana tabacu
A002778_01	At1g31230	0	-0.225	0.192	0.076	-0.374	-0.159	-0.12	-0.393	0.007	-0.01	-0.258	-0.381	-0.212	-0.124	-0.5		0	-0.0662	0.229798		-0.12	-0.135	0.160588		-0.258	-0.295	0.147411		At1g31230	bifunctional aspartate kinase/homoserine dehydrogenase / AK-HSDH nearly identical to gb|X71364 [PIR|S46497] aspartate kinase / homoserine dehydrogenase from Arabidopsis thaliana; contains ACT domain
A002779_01	At1g69740	0.095	-0.191	-0.539	0	0.075	0.06	0.147	0.316	0.329	-0.26	0.092	-0.055	-0.043	0.06	0.218		0	-0.112	0.26407		0.147	0.1184	0.240215		0.06	0.0544	0.111428		At1g69740	porphobilinogen synthase, putative / delta-aminolevulinic acid dehydratase, putative similar to delta-aminolevulinic acid dehydratase (Alad) GI:493019 [SP|P43210] from Glycine max, SP|P24493 from Spinacia oleracea, SP|P30124 from Pisum sativum
A002780_01	At1g74210	0.052	0.223	-0.261	-0.356	0	0.27	0.021	0.024	0.326		-0.409	0.034	0.023	0.214	-0.349		0	-0.0684	0.236589		0.147	0.16025	0.160699		0.023	-0.0974	0.268854		At1g74210	glycerophosphoryl diester phosphodiesterase family protein low similarity to glycerophosphodiester phosphodiesterase [Borrelia hermsii] GI:1399038; contains Pfam profile PF03009: Glycerophosphoryl diester phosphodiesterase family
A002782_01	At1g67950	0.281	-0.007	0.754	-0.221	0	0.358	0.259	0.168	0.384	0.839	-0.213	-0.465	-0.001	0.052	-0.237		0	0.1614	0.376204		0.358	0.4016	0.259053		-0.213	-0.1728	0.206863		At1g67950	RNA recognition motif (RRM)-containing protein
A002784_01	At1g61640	0.28	0	0.971	-0.095	-1.131	0.926	0.568	0.584	1.475	1.856	0.388	0.353	0.43	0.554	0.228		0	0.005	0.759819		0.926	1.0818	0.567904		0.388	0.3906	0.118439		At1g61640	ABC1 family protein contains Pfam domain, PF03109: ABC1 family
A002788_01	At1g17550	-0.006	0	0.426	0.152	-0.083	-0.262	-0.295	-0.479	-0.332	-0.331	-0.004	-0.145	-0.194	-0.085	-0.113		0	0.0978	0.202287		-0.331	-0.3398	0.0830283		-0.113	-0.1082	0.0709486		At1g17550	protein phosphatase 2C-related / PP2C-related similar to protein phosphatase 2C GI:3242077 from (Arabidopsis thaliana)
A002791_01	At1g54030	0	0.439	-0.103	0.079	-0.081	0.018	0.171	0.406	0.349	0.159	0.01	0.433	0.246	0.312	0.194		0	0.0668	0.220125		0.171	0.2206	0.156653		0.246	0.239	0.156109		At1g54030	GDSL-motif lipase, putative similar to myrosinase-associated proteins GI:1769968, GI:1769970, GI:1216391, GI:1216389 from [Brassica napus]; contains Pfam profile PF00657: GDSL-like Lipase/Acylhydrolase
A002792_01	At1g08760	-0.086	0	0.347	0.169	-0.33	-0.047	-0.198	-0.379	-0.306	-0.37	-0.086	-0.013	-0.237	-0.118	-0.042		0	0.02	0.256547		-0.306	-0.26	0.139275		-0.086	-0.0992	0.0869178		At1g08760	expressed protein similar to At1g21030, At5g44890, At2g29240, At1g08740; similar to EST gb|N96641
A002795_01	At1g17490	0	0.053	0.912	-0.099	-0.355	0.431	0.361	0.516	0.559	0.649	0.398	0.634	0.78	0.464	0.599		0	0.1022	0.479102		0.516	0.5032	0.111769		0.599	0.575	0.149777		At1g17490	expressed protein
A002797_01	At1g54710	0.197	-0.06	0	0.264	-0.04	-0.192	-0.264	-0.152	-0.346	-0.84	0.028	0.1	-0.118	0.018	-0.12		0	0.0722	0.148021		-0.264	-0.3588	0.278968		0.018	-0.0184	0.0971329		At1g54710	expressed protein contains 3 WD-40 repeats (PF00400) (1 weak) submitForm();
A002798_01	At1g53570	0	-0.026	-0.105	0.136	0.16	-0.151	-0.174	-0.051	-0.158	-1.105	0.07	0.028	-0.245	-0.128	0.135		0	0.033	0.112196		-0.158	-0.3278	0.437151		0.028	-0.028	0.15524		At1g53570	mitogen-activated protein kinase kinase kinase (MAPKKK), putative (MAP3Ka) identical to MEK kinase (MAP3Ka)[Arabidopsis thaliana] gi|4204912|gb|AAD10848
A002800_01	At1g76150	0	0.21	-0.627	-0.101	0.09		0.185	0.407	0.276	-1.288	0.353	0.519	0.453	0.501	0.281		0	-0.0856	0.32361		0.231	-0.105	0.793913		0.453	0.4214	0.101552		At1g76150	maoC-like dehydratase domain-containing protein contains similarity to Swiss-Prot:P51659 estradiol 17 beta-dehydrogenase 4 (17-beta-HSD 4) (17-beta-hydroxysteroid dehydrogenase 4) [Homo sapiens]; contains Pfam profile PF01575: MaoC like domain
A002803_01	At1g04260	0	-0.085	-0.523	0.048	0.166	0.189	-0.003	0.033	0.309	0.203	0.188	0.2	0.091	0.1	0.424		0	-0.0788	0.26437		0.189	0.1462	0.129071		0.188	0.2006	0.13435		At1g04260	prenylated rab acceptor (PRA1) family protein weak similarity to prenylated Rab acceptor [Mus musculus] GI:7716652; contains Pfam profile PF03208: Prenylated rab acceptor (PRA1)
A002806_01	At1g35550	0.048	0	0.276	-0.831	-0.468	-0.496	-1.075	-0.264	-0.651	-0.716		-1.187	-0.998	-0.873	-1.333		0	-0.195	0.446637		-0.651	-0.6404	0.298845		-1.093	-1.09775	0.203118		At1g35550	elongation factor Tu C-terminal domain-containing protein similar to SP|P13905 Elongation factor 1-alpha (EF-1-alpha) {Arabidopsis thaliana}; contains Pfam profile PF03143: Elongation factor Tu C-terminal domain
A002808_01	At1g08660	0.116	0.068	-0.197		-0.068	0.329	0.171	0.209	0.037	-0.522	-0.024	0.074	0.108	0.372	0.143		0	-0.02025	0.141271		0.171	0.0448	0.333534		0.108	0.1346	0.146597		At1g08660	glycosyl transferase family 29 protein / sialyltransferase family protein contains Pfam profile: PF00777 sialyltransferase (Glycosyltransferase family 29)
A002816_01	At1g05600	0	0.096	-0.094	-0.329	0.326	-0.163	-0.122	0.071	-0.497		-0.122	0.071		0.106	-0.23		0	-0.0002	0.241127		-0.143	-0.17775	0.236025		-0.025	-0.04375	0.159588		At1g05600	pentatricopeptide (PPR) repeat-containing protein contains Pfam profile: PF01535 PPR repeat
A002818_01	At1g21920	-0.719	0.125	-0.399	0.156	0	-0.749	-0.49	-0.318	-0.667	-0.871	-0.233	-0.066	-0.229	-0.144	-0.408		0	-0.1674	0.379476		-0.667	-0.619	0.217916		-0.229	-0.216	0.127481		At1g21920	MORN (Membrane Occupation and Recognition Nexus) repeat-containing protein /phosphatidylinositol-4-phosphate 5-kinase-related similar to phosphatidylinositol-4-phosphate 5-kinase AtPIP5K1 [Arabidopsis thaliana] GI:3702691; contains Pfam profile PF02493: M
A002822_01	At1g19580	0.043	0.087	0	-0.146	-0.149	0.115	0.117	0.125	0.179	-0.391	-0.064	-0.043	-0.09	-0.056	-0.246		0	-0.033	0.108961		0.117	0.029	0.23625		-0.064	-0.0998	0.0835117		At1g19580	bacterial transferase hexapeptide repeat-containing protein contains Pfam profile PF00132: Bacterial transferase hexapeptide (four repeats)
A002823_01	At1g08640	0	0.093	0.178	-0.214	-0.292	0.03	0.021	-0.118	-0.143	0.074	0.023	-0.078	-0.074	0.052	-0.246		0	-0.047	0.200217		0.021	-0.0272	0.0968127		-0.074	-0.0646	0.116665		At1g08640	expressed protein
A002825_01	At1g29150	-0.028	0	-0.297	0.196	0.24	0.188	0.058	0.145	0.352	-0.262	0.455	0.43	0.23	0.361	0.346		0	0.0222	0.213626		0.145	0.0962	0.226941		0.361	0.3644	0.0879278		At1g29150	26S proteasome regulatory subunit, putative (RPN6) similar to 19S proteosome subunit 9 GB:AAC34120 GI:3450889 from [Arabidopsis thaliana]
A002830_01	At1g29260	0.025	0	-0.619	-0.046	0.011	0.096	0.063	0.187	-0.075	-0.342	0.443	0.238	0.075	0.11	0.403		0	-0.1258	0.27699		0.063	-0.0142	0.205994		0.238	0.2538	0.166549		At1g29260	peroxisomal targeting signal type 2 receptor (PEX7) identical to peroxisomal targeting signal type 2 receptor (Pex7p) (GI:9502414) [Arabidopsis thaliana]; WD-40 repeat protein family member; contains 6 WD-40 repeats (PF00400); similar to peroxismal target
A002831_01	At1g52690	2.642	0	1.515	-0.408	-0.051	0.111	-1.061	-0.992	-0.926	-0.632	-0.507	-0.574	-0.808	-0.678	0.723		0	0.7396	1.29513		-0.926	-0.7	0.481925		-0.574	-0.3688	0.620833		At1g52690	late embryogenesis abundant protein, putative / LEA protein, putative similar to SP|P13934 Late embryogenesis abundant protein 76 (LEA 76) {Brassica napus}; contains Pfam profile PF02987: Late embryogenesis abundant protein
A002834_01	At1g10500	0	0.055	0.013	-0.277	-0.248	-0.297	-0.374	-0.163	0.165	-0.121	-0.301	-0.242	-0.001	-0.05	-0.366		0	-0.0914	0.157843		-0.163	-0.158	0.207183		-0.242	-0.192	0.15914		At1g10500	hesB-like domain-containing protein similar to IscA (putative iron-sulfur cluster assembly protein) [Azotobacter vinelandii] GI:2271523; contains Pfam profile PF01521: HesB-like domain
A002835_01	At1g09740	0	-0.186	-0.351	0.181	0.191	0.37	0.452	0.376	0.039	0.52	0.799	0.884	0.55	0.423	0.938		0	-0.033	0.235369		0.376	0.3514	0.185129		0.799	0.7188	0.222353		At1g09740	ethylene-responsive protein, putative similar to ER6 protein [Lycopersicon esculentum] GI:5669654; contains Pfam profile PF00582: universal stress protein family
A002836_01	At1g10330		0	0.35	-0.49		-0.273	-0.153	-0.294	0.19	0.609	-0.483	-0.152	0.2	0.03	-0.238		0	-0.0466667	0.42194		-0.153	0.0158	0.384092		-0.152	-0.1286	0.260407		At1g10330	pentatricopeptide (PPR) repeat-containing protein contains Pfam profile PF01535: PPR repeat
A002838_01	At1g08980	0	-0.028	-0.651	0.134	0.278	0.455	0.625	0.522	0.276	0.018	0.723	0.671	0.441	0.368	0.772		0	-0.0534	0.355516		0.455	0.3792	0.238574		0.671	0.595	0.179398		At1g08980	amidase family protein similar to component of chloroplast outer membrane translocon Toc64 [Pisum sativum] GI:7453538; contains Pfam profile PF01425: Amidase; supporting cDNA gi|11493701|gb|AF202077.1|AF202077
A002839_01	At1g36060	0	-0.543	-1.306	0.04	0.854	-0.276	-0.346	0.123	-0.298	-0.347	0.575	0.413	0.453	0.574	1.008		0	-0.191	0.798279		-0.298	-0.2288	0.199052		0.574	0.6046	0.236768		At1g36060	AP2 domain-containing transcription factor, putative similar to AP2 domain transcription factor GI:4567204 from [Arabidopsis thaliana]
A002842_01	At1g16340	0	0.128	0.658	-0.404	-0.411	0.347	0.09	-0.419	-0.302	-0.414	-0.36	-0.42	-0.445	-0.211	-0.324		0	-0.0058	0.441961		-0.302	-0.1396	0.342502		-0.36	-0.352	0.0921982		At1g16340	2-dehydro-3-deoxyphosphooctonate aldolase, putative / phospho-2-dehydro-3-deoxyoctonate aldolase, putative / 3-deoxy-D-manno-octulosonic acid 8-phosphate synthetase, putative similar to Swiss-Prot:Q9AV97 2-dehydro-3-deoxyphosphooctonate aldolase (EC 4.1.2
A002846_01	At1g05055		-0.037	0.221	0.011	-0.011	-0.069	-0.037	0.048	-0.082		0.162	0.219	-0.046	-0.049	-0.092		0	0.046	0.118305		-0.053	-0.035	0.0584751		-0.046	0.0388	0.141119		At1g05055	basic transcription factor 2, 44kD subunit-related contains weak similarity to Swiss-Prot:Q13888 TFIIH basal transcription factor complex p44 subunit (Basic transcription factor 2 44 kDa subunit, BTF2-p44, General transcription factor IIH polypeptide 2) [
A002849_01	At1g16510	-0.087	0.116	0	0.444	-0.071	0.593	0.415	0.557	0.814	1.58	0.713	0.525	0.641	0.407	1.355		0	0.0804	0.21845		0.593	0.7918	0.463245		0.641	0.7282	0.369179		At1g16510	auxin-responsive family protein similar to indole-3-acetic acid induced protein (SP:D14414) [Vigna radiata.]; ESTs gb|AA712892 and gb|Z17613 come from this gene
A002851_01	At1g43710	0.115	-0.041	-0.33	0.254	0	-0.089	-0.079	-0.182	-0.277	-0.749	-0.228	-0.007	-0.406	-0.299	-0.214		0	-0.0004	0.21698		-0.182	-0.2752	0.27674		-0.228	-0.2308	0.146392		At1g43710	serine decarboxylase identical to serine decarboxylase [Arabidopsis thaliana] GI:15011302; contains Pfam profile PF00282: Pyridoxal-dependent decarboxylase conserved domain
A002852_01	At1g55890		0.604	-0.317	0.186	-0.186	1.059	0.981	0.699	0.72	-1.062	1.306	1.163	0.701	0.718	1.013		0	0.07175	0.413886		0.72	0.4794	0.876009		1.013	0.9802	0.26802		At1g55890	pentatricopeptide (PPR) repeat-containing protein contains Pfam profile PF01535: PPR repeat
A002854_01	At1g80310	-0.065	0	-0.379	0.425	0.174	-0.506	-0.352	-0.305	-0.471	0.178	-0.15	-0.098	-0.327	-0.397	0.06		0	0.031	0.297474		-0.352	-0.2912	0.275001		-0.15	-0.1824	0.182957		At1g80310	expressed protein
A002855_01	At1g32700	-0.068	0.132	0.481	-0.015	0	-0.091	0.002	0.384	0.294	-0.031	0.198	0.433	0.677	0.62	0.48		0	0.106	0.222179		0.002	0.1116	0.212641		0.48	0.4816	0.187169		At1g32700	zinc-binding family protein similar to zinc-binding protein [Pisum sativum] GI:16117799; contains Pfam profile PF04640 : Protein of unknown function, DUF597
A002857_01	At1g13940		-0.113	0.294	0.113	-0.405	-0.199		0.056	0.131	0.307	-0.192	-0.033	0.282	0.275	0.092		0	-0.02775	0.301617		0.093	0.07375	0.210072		0.092	0.0848	0.203477		At1g13940	expressed protein
A002858_01	At1g26580	-0.182	-0.003	0.349	0.29	0	0.388	0.444	0.249	0.164	-0.014	0.354	0.312	0.2	0.198	0.197		0	0.0908	0.22238		0.249	0.2462	0.182826		0.2	0.2522	0.0752476		At1g26580	expressed protein similar to putative MYB family transcription factor GB:AAD17429 GI:4335752 from [Arabidopsis thaliana]
A002862_01	At1g09390	0.007	-0.088	-0.629	0	0.429	-0.012	0.118	-0.129	-0.037		-0.323	-0.364	-0.29	-0.414	-0.439		0	-0.0562	0.378049		-0.024	-0.015	0.101944		-0.364	-0.366	0.0617697		At1g09390	GDSL-motif lipase/hydrolase family protein Similar to early nodulin ENOD8 [Medicago sativa] GI:304037, lanatoside 15'-O-acetylesterase [Digitalis lanata] GI:3688284, elicitor-induced glycoprotein iEP4 [Daucus carota] GI:1911765; contains InterPro Entry IP
A002863_01	At1g54520	0	-0.177	-0.372	0.074	0.098	-0.334	-0.331	-0.113	-0.04	-0.985	-0.324	-0.183	-0.31	-0.296	-0.028		0	-0.0754	0.197716		-0.331	-0.3606	0.372676		-0.296	-0.2282	0.125089		At1g54520	expressed protein
A002869_01	At1g30400	0	-0.04	0.16	0.067	-0.514	0.045	0.049	-0.083	-0.163	-0.432	0.105	0.265	0.353	0.341	-0.073		0	-0.0654	0.261963		-0.083	-0.1168	0.197672		0.265	0.1982	0.181006		At1g30400	glutathione S-conjugate ABC transporter (MRP1) identical to glutathione S-conjugate transporting ATPase (AtMRP1) [Arabidopsis thaliana] GI:2340166
A002871_01	At1g34300	0.136	0.127	-0.037	-0.167	0	-0.059	0.164	0.324	0.098	-0.3	0.092	0.285	0.424	0.561	-0.038		0	0.0118	0.125685		0.098	0.0454	0.236987		0.285	0.2648	0.242402		At1g34300	lectin protein kinase family protein contains Pfam domains, PF01453: Lectin (probable mannose binding) and PF00069: Protein kinase domain
A002872_01	At1g34270	0	0.067	-1.059	0.032	-0.096	-0.154	-0.037	0.291	-0.061	-1.746	0.09	0.105	0.137	0.118	0.047		0	-0.2112	0.477803		-0.061	-0.3414	0.803		0.105	0.0994	0.0340044		At1g34270	exostosin family protein contains Pfam profile: PF03016 Exostosin family
A002876_01	At1g15220		-0.035	0.035	-0.223	0.617	0.003	-0.318	0.244	-0.074	0.162	0.056	0.071		-0.049	0.157		0	0.0985	0.362427		0.003	0.0034	0.219278		0.064	0.05875	0.0845		At1g15220	cytochrome c biogenesis protein family contains Pfam PF03918: Cytochrome C biogenesis protein; similar to Cytochrome c-type biogenesis protein cycL precursor.(SP:P45405) {Bradyrhizobium japonicum}
A002877_01	At1g15240	-0.267	0.139	0	0.283	-0.403	-0.182	-0.235	0.133	0.048		-0.129	0.08	0.357	0.536	-0.146		0	-0.0496	0.283199		-0.067	-0.059	0.177405		0.08	0.1396	0.300691		At1g15240	phox (PX) domain-containing protein weak similarity to SP|Q9Y5W8 Sorting nexin 13 {Homo sapiens}; contains Pfam profiles PF00787: PX domain, PF02194: PXA domain
A002880_01	At1g55850	-0.796	-0.011	0.428	0	0.254	0.153	0.28	0.255	0.175	0.795	0.689	0.807	0.663	0.515	1.032		0	-0.025	0.468592		0.255	0.3316	0.264429		0.689	0.7412	0.192938		At1g55850	cellulose synthase family protein similar to cellulose synthase catalytic subunit [gi:13925881] from Nicotiana alata, cellulose synthase-5 [gi:9622882] from Zea mays
A002881_01	At1g15420	0	0.094	-0.094	0.183	-0.019	0.463	0.393	-0.155	0.161	0.305	0.599	0.449	0.17	0.295	1.024		0	0.0328	0.107404		0.305	0.2334	0.244648		0.449	0.5074	0.330768		At1g15420	expressed protein
A002882_01	At1g30825	0.19	0.089	-0.211	-0.318	0	-0.132	-0.28	-0.013	-0.013	-0.466	-0.185	-0.217	-0.068	-0.232	-0.105		0	-0.05	0.210455		-0.132	-0.1808	0.193568		-0.185	-0.1614	0.071654		At1g30825	actin-related protein 2/3 complex 34kDa subunit family / arp2/3 complex 34kDa subunit family contains Pfam PF04045: Arp2/3 complex, 34kD subunit p34-Arc; similar to ARP2/3 complex 34 kDa subunit (P34-ARC) (Swiss-Prot:O96623) [Dictyostelium discoideum]; si
A002883_01	At1g10120	-0.059	0.073	-0.254		0.059	0.624	0.641	0.291	0.275		0.401	0.461	0.384	0.298	0.381		0	-0.04525	0.151236		0.457	0.45775	0.202009		0.384	0.385	0.0583481		At1g10120	basic helix-loop-helix (bHLH) family protein contains Pfam domain, PF00010: Helix-loop-helix DNA-binding domain
A002895_01	At1g56190	0	-0.127	0.653	-0.034	0.028	-0.288	-0.597	-0.451	-0.28	0.248	-0.857	-0.853	-0.763	-0.567	-0.695		0	0.104	0.312409		-0.288	-0.2736	0.31952		-0.763	-0.747	0.121136		At1g56190	phosphoglycerate kinase, putative similar to SP|P41758 Phosphoglycerate kinase, chloroplast precursor (EC 2.7.2.3) {Chlamydomonas reinhardtii}; contains Pfam profile PF00162: phosphoglycerate kinase
A002896_01	At1g32760	-0.083	0	0.051	0.203	-0.051	-0.014	-0.033	0.02	-0.261	0.47	0.068	0.056	0.147	0.263	0.17		0	0.024	0.112272		-0.014	0.0364	0.266496		0.147	0.1408	0.084135		At1g32760	glutaredoxin family protein contains Pfam profile PF00462: Glutaredoxin
A002898_01	At1g34630	0.126	0	0	-0.007	0.177	0.146	0.096	-0.011	0.134	-0.137	0.104	0.143	0.044	0.082	0.348		0	0.0592	0.0862131		0.096	0.0456	0.119354		0.104	0.1442	0.119437		At1g34630	expressed protein
A002901_01	At1g32790	0	0.345	0.392	-0.106	-0.122	-0.982	-1.213	-1.037	-0.62	-0.681	-1.25	-0.999	-0.656	-0.558	-1.13		0	0.1018	0.248492		-0.982	-0.9066	0.249803		-0.999	-0.9186	0.299988		At1g32790	RNA-binding protein, putative similar to RNA-binding protein GB:CAB40027 GI:4539439 from [Arabidopsis thaliana]
A002902_01	At1g76920	0.048	0	-0.148	-0.207	0.002	0.049	0.073	0.003	-0.086	-0.043	0.067	0.19	-0.063	-0.1	-0.004		0	-0.061	0.110064		0.003	-0.0008	0.0651552		-0.004	0.018	0.115059		At1g76920	F-box family protein (FBX3) contains similarity to stamina pistilloidia GI:4101570, the pea ortholog of Fim and UFO from [Pisum sativum]
A002907_01	At1g21500	0	-0.44	-0.799	0.087	0.164	-0.207	-0.477	-0.528	-0.345	-0.418	-0.46	-0.398	-0.674	-0.837	-0.322		0	-0.1976	0.409645		-0.418	-0.395	0.125286		-0.46	-0.5382	0.212272		At1g21500	expressed protein
A002908_01	At1g52420	0	-0.015	0.943	0.117	-0.153	0.427	0.261	0.218	0.205	0.505	0.187	0.353	0.142	0.38	0.23		0	0.1784	0.438018		0.261	0.3232	0.134845		0.23	0.2584	0.10391		At1g52420	glycosyl transferase family 1 protein contains Pfam profile: PF00534 Glycosyl transferases group 1
A002910_01	At1g27600		-0.074	-0.431	0.074	0.287	0.056	-0.07	-0.087	-0.117	-1.098	0.245	0.113		0.012	0.267		0	-0.036	0.302158		-0.087	-0.2632	0.471308		0.179	0.15925	0.119422		At1g27600	glycosyl transferase family 43 protein similar to Galactosylgalactosylxylosylprotein 3-beta-glucuronosyltransferase 1, Rattus norvegicus [SP|O35789], Homo sapiens [SP|Q9P2W7]; contains Pfam domain Glycosyltransferase family 43 [PF03360]
A002912_01	At1g10020	0	-0.662	-0.944	0.129	0.145	0.374	0.413	0.06	0.044	-0.83	0.39	-0.109	-0.086	-0.106	0.375		0	-0.2664	0.503041		0.06	0.0122	0.501033		-0.086	0.0928	0.26466		At1g10020	expressed protein
A002913_01	At1g68720	0	-0.168	0.342	0.313	-0.109	-0.212	-0.309	-0.095	0.134	0.766	-0.043	-0.251	0.151	-0.073	0.252		0	0.0756	0.23794		-0.095	0.0568	0.429544		-0.043	0.0072	0.197626		At1g68720	cytidine/deoxycytidylate deaminase family protein contains Pfam profile PF00383: Cytidine and deoxycytidylate deaminase zinc-binding region
A002914_01	At1g68730	0.147	0.018	0	-0.42	-0.111	-0.018	0.137	0.279	0.132	-0.146	-0.127	0.226	0.227	0.01	0.414		0	-0.0732	0.214396		0.132	0.0768	0.162929		0.226	0.15	0.21079		At1g68730	zinc finger (DNL type) family protein contains Pfam profile PF05180: DNL zinc finger
A002916_01	At1g68670	-0.04	0	-0.983	0.26	0.111	0.068	0.214	0.201	-0.179	-1	0.335	0.429	0.281	0.381	0.294		0	-0.1304	0.490609		0.068	-0.1392	0.506453		0.335	0.344	0.0615305		At1g68670	myb family transcription factor contains Pfam domain, PF00249: Myb-like DNA-binding domain
A002917_01	At1g68620	0	0.114	-0.192	0.31	-0.156	-0.466	-0.415	-0.078	0.043	0.122	-0.002	-0.509	-0.116	-0.213	-0.002		0	0.0152	0.205634		-0.078	-0.1588	0.267447		-0.116	-0.1684	0.209834		At1g68620	expressed protein similar to PrMC3 [Pinus radiata] GI:5487873
A002919_01	At1g65260	0.107	0	-0.33	-0.102	0.012	-0.429	-0.229	0.03	-0.113	-0.463	-0.305	-0.367	-0.233	-0.316	-0.6		0	-0.0626	0.166811		-0.229	-0.2408	0.208924		-0.316	-0.3642	0.140224		At1g65260	PspA/IM30 family protein contains Pfam PF04012: PspA/IM30 family profile; similar to Membrane-associated 30 kDa protein, chloroplast precursor (M30) (Swiss-Prot:Q03943) [Pisum sativum]; similar to phage shock protein A (GI:28806161) [Vibrio parahaemolytic
A002923_01	At1g74940	0	0.217	0.162	-0.273	-0.216	-0.341	0.063	0.237	-0.038	-0.326	-0.127	0.139	0.247	0.793	-0.276		0	-0.022	0.219145		-0.038	-0.081	0.250666		0.139	0.1552	0.412628		At1g74940	senescence-associated protein-related similar to senescence-associated protein SAG102 (GI:22331931) [Arabidopsis thaliana]
A002932_01	At1g80190	0.063	-0.063	-0.257	0.166		-0.434	-0.329	0.212	0.09		0.487	-0.106	0.118	0.23	0.73		0	-0.02275	0.182092		-0.119	-0.11525	0.314383		0.23	0.2918	0.324959		At1g80190	expressed protein
A002934_01	At1g80000	0	-0.167	0.004	0.158	-0.268	-0.063	-0.169	0.126	0.113	0.083	0.336	0.218	0.229	0.177	0.292		0	-0.0546	0.165671		0.083	0.018	0.128884		0.229	0.2504	0.063153		At1g80000	expressed protein identical to unknown protein GB:AAD55481 [Arabidopsis thaliana]
A002939_01	At1g80230	0	-0.161	-0.375	0.193	0.148	0.183	0.092	-0.177	0.086	-0.38	0.105	0.12	-0.421	-0.227	0.244		0	-0.039	0.233503		0.086	-0.0392	0.233128		0.105	-0.0358	0.277184		At1g80230	cytochrome c oxidase family protein contains Pfam domain, PF01215: Cytochrome c oxidase subunit Vb
A002940_01	At1g34560	0	0.146	0.52	-0.052	-0.265	0.237	0.097	0.288	0.486	0.399	0.184	0.221	0.271	0.347	-0.036		0	0.0698	0.29167		0.288	0.3014	0.149757		0.221	0.1974	0.144057		At1g34560	hypothetical protein
A002941_01	At1g70760	0.239	-0.01	0	-0.093	0.231	-0.414	-0.376	-0.39	-0.726	-0.763	-0.792	-0.65	-0.546	-0.705	-0.244		0	0.0734	0.151899		-0.414	-0.5338	0.193265		-0.65	-0.5874	0.211688		At1g70760	inorganic carbon transport protein-related contains weak similarity to Swiss-Prot:P27372 inorganic carbon transport protein [Synechocystis sp.]
A002946_01	At1g52720	0.228	-0.023	0	-0.015	0.295	0.805	0.784	0.477	0.791	0.813	0.45	0.515	0.195	0.022	0.624		0	0.097	0.152248		0.791	0.734	0.144118		0.45	0.3612	0.246619		At1g52720	expressed protein
A002947_01	At1g30330	-0.267	0.149	0.26	0	-0.497	0.535	0.653	0.304	0.641	0.391	0.404	-0.207	0.041	0.542	-0.133		0	-0.071	0.309392		0.535	0.5048	0.153864		0.041	0.1294	0.329953		At1g30330	auxin-responsive factor (ARF6) identical to ARF6 [Arabidopsis thaliana] GI:4102600 (Science 276 (5320), 1865-1868 (1997))
A002950_01	At1g52590	0	0.077	0.452	-0.317	-0.098	-0.283	-0.207	0.007	-0.016	-0.101	-0.562	-0.492	-0.019	-0.266	-0.272		0	0.0228	0.281836		-0.101	-0.12	0.12394		-0.272	-0.3222	0.214444		At1g52590	expressed protein
A002951_01	At1g52540	0	0.045	0.036	-0.1	-0.131	-0.34	-0.308	-0.045	-0.134	-0.552	-0.505	-0.663	-0.155	-0.145	-1.044		0	-0.03	0.0805947		-0.308	-0.2758	0.196736		-0.505	-0.5024	0.37668		At1g52540	protein kinase, putative contains protein kinase domain, Pfam:PF00069
A002952_01	At1g34640	-0.08	0	-0.192	0.078	0.293	-0.677	-0.455	-0.303	-0.988	-0.231	-0.478	-0.737	-0.291	-0.336	-0.205		0	0.0198	0.182508		-0.455	-0.5308	0.307378		-0.336	-0.4094	0.208094		At1g34640	expressed protein
A002953_01	At1g15130	0	0.08	-0.374	0.699	-0.114	0.029	0.187	0.457	0.227	-0.834	0.413	0.545	0.329	0.388	0.413		0	0.0582	0.397158		0.187	0.0132	0.497713		0.413	0.4176	0.0790557		At1g15130	hydroxyproline-rich glycoprotein family protein
A002955_01	At1g72820	0.021	-0.102	-0.572	0	0.145	-0.243	-0.242	-0.101	-0.641	-1.68	-0.028	-0.022	-0.321	-0.253	-0.064		0	-0.1016	0.277237		-0.243	-0.5814	0.646329		-0.064	-0.1376	0.139414		At1g72820	mitochondrial substrate carrier family protein contains Pfam profile: PF00153 mitochondrial carrier protein
A002956_01	At1g72840	-0.415	0	0.844	0.285	-0.365	-0.487	-0.011	0.159	0.057	1.686	0.055	-0.31	0.412		0.388		0	0.0698	0.518327		0.057	0.2808	0.823737		0.221	0.13625	0.339194		At1g72840	disease resistance protein (TIR-NBS-LRR class), putative domain signature TIR-NBS-LRR exists, suggestive of a disease resistance protein.
A002958_01	At1g22610	0.102	0	-0.096	0.148	-0.009	-0.074	-0.218	-0.31	0.171	-0.363	-0.12	-0.258	-0.325		-0.024		0	0.029	0.0966954		-0.218	-0.1588	0.214489		-0.189	-0.18175	0.135441		At1g22610	C2 domain-containing protein contains INTERPRO:IPR000008 C2 domain
A002959_01	At1g72940	0.19	-0.35	0.282	-0.73	0	-0.053	0.162	0.842	0.493	0.702	-0.902	-1.066	-0.093	-0.956	-1.002		0	-0.1216	0.41746		0.493	0.4292	0.371755		-0.956	-0.8038	0.401895		At1g72940	disease resistance protein (TIR-NBS class), putative domain signature TIR-NBS exists, suggestive of a disease resistance protein.
A002968_01	At1g02990	0	-0.033	0.16	0.333	-0.005	-0.404	-0.353	-0.107	0.012		-0.117	-0.094	-0.116	-0.018	-0.12		0	0.091	0.155079		-0.23	-0.213	0.198278		-0.116	-0.093	0.0431856		At1g02990	expressed protein similar to mature-parasite-infected erythrocyte surface antigen (GI:160409) {Plasmodium falciparum}
A002969_01	At1g74790	0.04	-0.436	-0.537	0	0.747	-1.128	-1.174	-0.623	-0.123	-1.399	-1.296	-1.315	-1.476	-1.164	0.207		0	-0.0372	0.507729		-1.128	-0.8894	0.513799		-1.296	-1.0088	0.688617		At1g74790	expressed protein contains similarity to hedgehog-interacting protein GI:4868122 from [Mus musculus]
A002971_01	At1g06510	0.326	0.176	-0.217	0	-0.083	-0.054	0.052	0.318	0.081	-1.115	0.067	0.211	0.317	0.167	-0.017		0	0.0404	0.213933		0.052	-0.1436	0.559782		0.167	0.149	0.129105		At1g06510	expressed protein
A002973_01	At1g14700	0.17	0.015	-0.032	-0.412	0	-0.868	-0.852	-0.534	-1.287	-0.966	-1.141	-1.157	-0.915	-0.948	-0.95		0	-0.0518	0.215915		-0.868	-0.9014	0.269907		-0.95	-1.0222	0.116721		At1g14700	purple acid phosphatase, putative contains Pfam profile: PF00149 calcineurin-like phosphoesterase; similar to purple acid phosphatase (GI:20257479) [Arabidopsis thaliana]
A002977_01	At1g19130	0	0.002	-0.113	-0.056	0.229	0.327	0.403	0.239	0.211	0.544	0.399	0.536	0.226	0.174	0.498		0	0.0124	0.129982		0.327	0.3448	0.134611		0.399	0.3666	0.161148		At1g19130	expressed protein
A002978_01	At1g17340	-0.123	-0.352	0.627	0	0.036	-0.278	-0.413	0.199	0.148	0.679	-0.364	-0.397	-0.174	-0.351	0.11		0	0.0376	0.362763		0.148	0.067	0.432422		-0.351	-0.2352	0.211593		At1g17340	phosphoinositide phosphatase family protein contains similarity to phosphoinositide phosphatase SAC1 [Rattus norvegicus] gi|11095248|gb|AAG29810; contains Pfam domain, PF02383: SacI homology domain; identical to cDNA SAC domain protein 5 (SAC5) GI:3141572
A002987_01	At1g63540	0	0.138	-0.541	0.462	-0.613	-0.467	-0.02	0.191	-0.086		-0.022	0.493	0.142	-0.05	0.093		0	-0.1108	0.458136		-0.053	-0.0955	0.274399		0.093	0.1312	0.217243		At1g63540	hydroxyproline-rich glycoprotein family protein
A002988_01	At1g04220	0.231	0	0.691	-0.174	-0.237	-1.62	-1.806	-1.619	-1.098	-1.303	-2.332	-2.435	-2.456	-1.774	-1.96		0	0.1022	0.375853		-1.619	-1.4892	0.283737		-2.332	-2.1914	0.306957		At1g04220	beta-ketoacyl-CoA synthase, putative Strong similarity to beta-keto-Coa synthase gb|U37088 from Simmondsia chinensis, GI:4091810
A002991_01	At1g63460	0.06	0	0.766	-0.149	-0.559	-0.134	0.475	0.528	0.553	1.222	-0.27	0.556	0.524	0.335	-0.101		0	0.0236	0.48017		0.528	0.5288	0.480445		0.335	0.2088	0.374517		At1g63460	glutathione peroxidase, putative contains Pfam profile: PF00255 glutathione peroxidases
A002993_01	At1g63430	0	0.201	-0.052	0.18	-1.056	-0.343	0.222	-0.057	-0.366	-0.756	-0.852	0.151	-0.27	-0.131	-1.087		0	-0.1454	0.520801		-0.343	-0.26	0.366631		-0.27	-0.4378	0.515265		At1g63430	leucine-rich repeat transmembrane protein kinase, putative contains Pfam profiles: PF00069 Eukaryotic protein kinase domain, PF00560 Leucine Rich Repeat; contains 1 predicted transmembrane domain
A002996_01	At1g56120	0	0.071	0.305	-1.017	-0.286	-0.092	-0.884	-0.996	-0.007	1.203	-1.076	-0.306	-0.67	0.108	-0.824		0	-0.1854	0.510462		-0.092	-0.1552	0.881584		-0.67	-0.5536	0.4633		At1g56120	leucine-rich repeat family protein / protein kinase family protein contains Pfam domains PF00560: Leucine Rich Repeat and PF00069: Protein kinase domain
A002997_01	At1g56140	0	-0.257	0.195	0.126	-0.079	0.41	0.435	0.857	1.688	2.037	0.682	0.226	0.785	0.282	0.399		0	-0.003	0.177585		0.857	1.0854	0.741623		0.399	0.4748	0.246969		At1g56140	leucine-rich repeat family protein / protein kinase family protein contains Pfam domains PF00560: Leucine Rich Repeat and PF00069: Protein kinase domain
A002998_01	At1g50320	0	-0.067	-0.728	0.022	0.286	-0.262	-0.309	-0.096	-0.204	-0.824	-0.253	-0.084	-0.245	-0.348	0.096		0	-0.0974	0.377266		-0.262	-0.339	0.282546		-0.245	-0.1668	0.174856		At1g50320	thioredoxin x nearly identical to thioredoxin x GB:AAF15952 GI:6539616 from [Arabidopsis thaliana]
A002999_01	At1g56580	0	0.281	0.382	-0.257	-0.082	0.174	-0.311	-0.521	-0.45	-0.331	-0.742	-1.108	-0.97	-0.794	-0.855		0	0.0648	0.262994		-0.331	-0.2878	0.272192		-0.855	-0.8938	0.146796		At1g56580	expressed protein contains Pfam profile PF04398: Protein of unknown function, DUF538
A003002_01	At1g01970	0.113	-0.008	0	-0.047	0.118	-0.461	-0.074	-0.21	-0.267	-0.432	-0.305	-0.088	-0.186	-0.116	-0.475		0	0.0352	0.07545		-0.267	-0.2888	0.160455		-0.186	-0.234	0.15864		At1g01970	pentatricopeptide (PPR) repeat-containing protein low similarity to 67 kD chloroplastic RNA-binding protein RSP67.2 [Raphanus sativus] GI:9755888; contains Pfam profile PF01535: PPR repeat
A003004_01	At1g77930	0.125	0	0.133	-0.091	-0.12	-0.215	-0.284	-0.142	0.036	-0.187	-0.402	-0.195	-0.143	-0.171	-0.579		0	0.0094	0.117849		-0.187	-0.1584	0.120268		-0.195	-0.298	0.187443		At1g77930	DNAJ heat shock N-terminal domain-containing protein similar to J-Domain (Residues 1-77) Of The Escherichia Coli N-Terminal Fragment (Residues 1-104) Of The Molecular Chaperone Dnaj GI:5542126; contains Pfam profile PF00226 DnaJ domain
A003006_01	At1g79850	0	-0.173	-0.603	0.055	0.098	-0.136	-0.158	-0.344	-0.453	-0.43	-0.291	-0.22	-0.419	-0.471	-0.021		0	-0.1246	0.286593		-0.344	-0.3042	0.149346		-0.291	-0.2844	0.177839		At1g79850	30S ribosomal protein S17, chloroplast / CS17 (RPS17) identical to 30S ribosomal protein S17, chloroplast precursor GB:P16180 [Arabidopsis thaliana]
A003009_01	At1g27750	-0.091	0	0.124	0.291	-0.181	-0.066	-0.137	0.15	0.195	0.217	0.073	0.186	-0.12	0.168	0.043		0	0.0286	0.185074		0.15	0.0718	0.16199		0.073	0.07	0.12237		At1g27750	ubiquitin system component Cue domain-containing protein very low similarity to ASC-1 complex subunit P100 [Homo sapiens] GI:12061187; contains Pfam profile PF02845: CUE domain
A003010_01	At1g68780	0.015	-0.196	-0.628	0	0.571	-0.628	-0.985	-0.474	-1.149		-0.879	-1.144	-1.305	-1.434			0	-0.0476	0.432359		-0.807	-0.809	0.311749		-1.225	-1.1905	0.239163		At1g68780	leucine-rich repeat family protein contains leucine rich-repeat (LRR) domains Pfam:PF00560, INTERPRO:IPR001611; contains similarity to disease resistance protein [Lycopersicon esculentum] gi|3894383|gb|AAC78591
A003012_01	At1g71480	0	-0.162	-0.579	0.227	0.397	-0.547	-0.681	-0.291	-0.272	-0.685	-0.395	-0.382	-0.658	-0.696	0.058		0	-0.0234	0.376791		-0.547	-0.4952	0.202944		-0.395	-0.4146	0.301342		At1g71480	nuclear transport factor 2 (NTF2) family protein contains Pfam domain, PF02136: Nuclear transport factor 2 (NTF2) domain
A003016_01	At1g55000	-0.121	0.068	0.449	-0.191	0	-0.246	-0.111	-0.081	-0.168	0.089	-0.093	-0.115	0.264	0.147	-0.057		0	0.041	0.24947		-0.111	-0.1034	0.124585		-0.057	0.0292	0.167455		At1g55000	peptidoglycan-binding LysM domain-containing protein contains Pfam profile PF01476: LysM domain
A003019_01	At1g15010	-0.937	0	0.211	0.149	-0.563	1.77	1.059	2.566	2.491	3.053	2.164	0.695	1.947	0.732	1.175		0	-0.228	0.500435		2.491	2.1878	0.779789		1.175	1.3426	0.681965		At1g15010	expressed protein
A003022_01	At1g69070	0.067	0.123	-0.045	0	-0.996	0.414	0.117	0.009	0.488		0.264	0.344	0.052	0.495	0.126		0	-0.1702	0.466052		0.266	0.257	0.2303		0.264	0.2562	0.175674		At1g69070	expressed protein
A003024_01	At1g01610	-0.075	-0.12	0.152	0.387	0	0.041	0.024	0.002	-0.222	-0.103	-0.166	-0.414	-0.536	-0.49	-0.672		0	0.0688	0.205688		0.002	-0.0516	0.1105		-0.49	-0.4556	0.187133		At1g01610	phospholipid/glycerol acyltransferase family protein similar to unknown protein GI:3335359 from [Arabidopsis thaliana]
A003028_01	At1g67320	-0.153	-0.05	0.448	0	0.171	0.108	-0.142	-0.534	-0.443	0.259	-0.485	-0.229	-0.376	-0.581	-0.138		0	0.0832	0.235182		-0.142	-0.1504	0.341765		-0.376	-0.3618	0.181074		At1g67320	DNA primase, large subunit family contains Pfam profile PF04104: Eukaryotic-type DNA primase, large subunit; similar to DNA primase large subunit (EC 2.7.7.-) (DNA primase 58 kDa subunit) (p58) (Swiss-Prot:P49643) [Homo sapiens]
A003029_01	At1g62780	0.008	0	0.389	-0.351	-0.384	-0.58	-0.293	-0.51	-0.396	-0.873	-0.673	-0.388	0.022	-0.119	-0.798		0	-0.0676	0.315909		-0.51	-0.5304	0.220609		-0.388	-0.3912	0.349905		At1g62780	expressed protein
A003034_01	At1g21980	0	0.109	0.208	-0.017	-0.706	-0.817	-1.025	-1.077	-0.53	-0.478	-1.983	-1.895	-1.695	-1.172	-1.917		0	-0.0812	0.360868		-0.817	-0.7854	0.2753		-1.895	-1.7324	0.331196		At1g21980	1-phosphatidylinositol-4-phosphate 5-kinase, putative / PIP kinase, putative / PtdIns(4)P-5-kinase, putative / diphosphoinositide kinase, putative strong similarity to phosphatidylinositol-4-phosphate 5-kinase AtPIP5K1 [Arabidopsis thaliana] GI:3702691; c
A003037_01	At1g10690	-0.018	0.209	-0.023	0	0.248	0.149	0.209	0.353	0.382	0.637	-0.029	0.49	0.505	0.417	0.708		0	0.0832	0.133629		0.353	0.346	0.189476		0.49	0.4182	0.272334		At1g10690	expressed protein
A003039_01	At1g28440	0	0.189	-0.149	0.331	-0.205	-0.115	-0.139	-0.089	-0.472	-2.053	-0.374	-0.272	-0.354	-0.292	-0.799		0	0.0332	0.22583		-0.139	-0.5736	0.841572		-0.354	-0.4182	0.217017		At1g28440	leucine-rich repeat transmembrane protein kinase, putative similar to receptor kinase GI:4105699 from [Arabidopsis thaliana]
A003050_01	At1g16570	0	0.025	-0.012	0.024	-0.181	-0.06	0.068	0.246	0.062	0.397	-0.001	0.108	0.199	0.407	-0.011		0	-0.0288	0.0865431		0.068	0.1426	0.179248		0.108	0.1404	0.172101		At1g16570	glycosyl transferase family 1 protein contains similarity to mannosyltransferase GI:1800223 from Dictyostelium discoideum; contains Pfam glycosyl transferase, group 1 family protein domain PF00534
A003054_01	At1g16810	0.057	0	0.108	-0.26	-0.061	0.187	0.155	0.271	0.158	0.278	0.517	0.555	0.424	0.368	0.55		0	-0.0312	0.142624		0.187	0.2098	0.060421		0.517	0.4828	0.0829681		At1g16810	expressed protein
A003055_01	At1g18060	0	-0.204	0.088	-0.095	0.049	-0.889	-0.999	-0.819	-0.651	-0.769	-1.357	-1.398	-1.108	-1.322	-1.053		0	-0.0324	0.117832		-0.819	-0.8254	0.130211		-1.322	-1.2476	0.15611		At1g18060	expressed protein
A003056_01	At1g28150	0	0.066	0.036	-0.365	-0.128	0.053	0.059	-0.155	-0.147	-0.033	0.016	0.177	-0.111	0.02	0.173		0	-0.0782	0.176554		-0.033	-0.0446	0.103763		0.02	0.055	0.121563		At1g28150	expressed protein
A003058_01	At1g77180	-0.053	-0.185	0.175	0.216	0	-0.009	-0.071	-0.062	-0.164	0.245	0.197	0.227	-0.071	0.027	0.122		0	0.0306	0.165555		-0.062	-0.0122	0.154226		0.122	0.1004	0.123076		At1g77180	chromatin protein family contains Pfam domain, PF02731: SKIP/SNW domain found in chromatin proteins.
A003059_01	At1g26220	0.135	0.081	-0.139	-0.082	0	-0.645	-0.402	-0.475	-0.796	-0.57	-0.686	-0.562	-0.522	-0.796	-0.865		0	-0.001	0.112723		-0.57	-0.5776	0.153021		-0.686	-0.6862	0.14698		At1g26220	GCN5-related N-acetyltransferase (GNAT) family protein low similarity to SP|P09453 Ribosomal-protein-alanine acetyltransferase (EC 2.3.1.128) {Escherichia coli}; contains Pfam profile PF00583: acetyltransferase, GNAT family
A003060_01	At1g17620	0	-0.226	-0.541	0.13	0.099	0.781	0.565	0.614	1.036	0.16	0.47	0.012	0.445	0.137	0.374		0	-0.1076	0.279539		0.614	0.6312	0.32133		0.374	0.2876	0.202574		At1g17620	expressed protein
A003062_01	At1g58025	-0.454	0	-1.59	0.054	0.594	0.538	-0.621	-1.086	0.053	-0.607	0.184	-0.611	-0.075	1.76	0.496		0	-0.2792	0.821615		-0.607	-0.3446	0.638747		0.184	0.3508	0.88616		At1g58025	DNA-binding bromodomain-containing protein contains bromodomain, INTERPRO:IPR001487; contains prenyl group binding site (CAAX box) Prosite:PS00294
A003069_01	At1g53290	0	0.014	-0.791	-0.196	0.285	-0.258	-0.138	-0.103	-0.535	-1.343	-0.25	-0.291	-0.339	-0.37	-0.147		0	-0.1376	0.403376		-0.258	-0.4754	0.513825		-0.291	-0.2794	0.087019		At1g53290	galactosyltransferase family protein contains Pfam profile: PF01762 galactosyltransferase ;contains similarity to Avr9 elicitor response protein GI:4138265 from [Nicotiana tabacum]
A003073_01	At1g62790	0.307	-0.252	-0.104	0.019	0	0.565	0.592	0.629	0.863	1.011	0.306	0.231	0.357	0.431	0.8		0	-0.006	0.205396		0.629	0.732	0.19564		0.357	0.425	0.22197		At1g62790	protease inhibitor/seed storage/lipid transfer protein (LTP) family protein contains Pfam protease inhibitor/seed storage/LTP family domain PF00234
A003074_01	At1g18300	0	0.423	-0.336	1.125	-0.205	1.659	0.324	2	1.326	2.434	1.597	0.234	1.241	0.424	-0.062		0	0.2014	0.590903		1.659	1.5486	0.798292		0.424	0.6868	0.701854		At1g18300	MutT/nudix family protein similar to SP|Q09790 Diadenosine 5',5'''-P1,P6-hexaphosphate hydrolase (EC 3.6.1.-) (Ap6A hydrolase) {Schizosaccharomyces pombe}; contains Pfam profile PF00293: NUDIX domain
A003078_01	At1g52980	0	0.033	0.877	-0.047	-0.394	0	0.109	-0.264	0.005	0.136	0.037	0.242	0.358	0.396	0.121		0	0.0938	0.470019		0.005	-0.0028	0.15816		0.242	0.2308	0.152652		At1g52980	GTP-binding family protein contains Pfam domain, PF01926: GTPase of unknown function
A003079_01	At1g31870	-0.008	0.048	0.419	0	-0.323	0.006	0.06	0.072	0.075	0.438	-0.032	0.043	0.111	0.168	-0.229		0	0.0272	0.263893		0.072	0.1302	0.174305		0.043	0.0122	0.154203		At1g31870	expressed protein
A003084_01	At1g05340	0.195	-0.336	-0.375	0.006	0	0.224	0.189	0.338	0.679	1.064	1.176	0.588	0.6	0.506	1.44		0	-0.102	0.244725		0.338	0.4988	0.370564		0.6	0.862	0.419266		At1g05340	expressed protein
A003087_01	At1g03380	0	0.32	0.394	-0.108	-0.45	-0.049	-0.017	0.331	-0.042	-1.789	0.027	-0.017	0.44	0.471	-0.377		0	0.0312	0.341662		-0.042	-0.3132	0.840248		0.027	0.1088	0.353341		At1g03380	expressed protein
A003088_01	At1g58230		-0.105	0.105	-0.157	1.388	-0.311	-0.263	-0.008	0.214	0.107	-0.307	-0.104	0.14	0.077	-0.009		0	0.30775	0.729018		-0.008	-0.0522	0.228897		-0.009	-0.0406	0.174952		At1g58230	WD-40 repeat family protein / beige-related contains Pfam PF00400: WD domain, G-beta repeat; similar to Lipopolysaccharide-responsive and beige-like anchor protein (CDC4-like protein) (Beige-like protein) (SP:P50851) [Homo sapiens}
A003091_01	At1g22620	-0.31	-0.208	0.162	0.453	0	-0.179	-0.091	0.075	-0.108	0.482	0.124	-0.277	0.06	0.139	0.066		0	0.0194	0.3037		-0.091	0.0358	0.266236		0.066	0.0224	0.170934		At1g22620	phosphoinositide phosphatase family protein contains similarity to phosphoinositide phosphatase SAC1 [Rattus norvegicus] gi|11095248|gb|AAG29810; contains Pfam domain, PF02383: SacI homology domain; identical to cDNA SAC domain protein 1 (SAC1) SAC1-FRA7
A003096_01	At1g12960	0	-0.038	0.616	-0.052	0.318	-0.598	-0.37	-0.151	-0.197	0.183	-0.432	-0.454	-0.034	-0.272	-0.388		0	0.1688	0.292515		-0.197	-0.2266	0.288472		-0.388	-0.316	0.172586		At1g12960	60S ribosomal protein L27A (RPL27aA) similar to GB:BAA96068 from [Panax ginseng]
A003099_01	At1g22690	0.34	-0.289	0	-0.188	0.77	-0.076	-0.171	-0.455	-0.843	-0.356	-0.386	-0.043	-0.226	-0.623	0.006		0	0.1266	0.432212		-0.356	-0.3802	0.298608		-0.226	-0.2544	0.258113		At1g22690	gibberellin-responsive protein, putative similar to SP|P46688 Gibberellin-regulated protein 2 precursor {Arabidopsis thaliana}; contains Pfam profile PF02704: Gibberellin regulated protein
A003104_01	At1g25580		0.216	0.12	-0.12	-0.181	0.816	0.547	0.734	0.819	0.081	0.152	0.703	0.214	0.409	0.158		0	0.00875	0.189658		0.734	0.5994	0.310138		0.214	0.3272	0.23455		At1g25580	no apical meristem (NAM) family protein contains Pfam PF02365: No apical meristem (NAM) domain; similar to putative NAM protein (GP:21554371) (Arabidopsis thaliana)
A003105_01	At1g18460	-0.243	0.071	-1.518	0.093	0	-0.755	-0.299	-0.252	-0.605		-0.384	-0.245	-0.534	-0.233	-0.774		0	-0.3194	0.683188		-0.452	-0.47775	0.242195		-0.384	-0.434	0.225955		At1g18460	lipase family protein similar to triacylglycerol lipase, gastric precursor (EC 3.1.1.3) {Canis familiaris} [SP|P80035]
A003106_01	At1g47830	0.106	0.324	-0.146	0	-0.043	0.281	0.357	0.549	0.732	0.051	0.398	0.458	0.609	0.649	0.3		0	0.0482	0.178718		0.357	0.394	0.259835		0.458	0.4828	0.145577		At1g47830	clathrin coat assembly protein, putative similar to clathrin coat assembly protein AP17 GB:CAA65533 GI:2959358 from [Zea mays]; contains Pfam profile: PF01217 clathrin adaptor complex small chain
A003107_01	At1g27210	0.138	0	0.088	-0.247	-0.147	-0.434	-0.516	-0.223	-0.587	-0.952	-0.809	-0.553	-0.714	-0.812	-0.904		0	-0.0336	0.16106		-0.516	-0.5424	0.266564		-0.809	-0.7584	0.133035		At1g27210	expressed protein
A003108_01	At1g12860	0	0.061	-0.554	-0.266	0.109	-0.367	-0.49	-0.463	-0.874	-1.133	-1.01	-0.632	-0.911	-0.852	-0.779		0	-0.13	0.277837		-0.49	-0.6654	0.325168		-0.852	-0.8368	0.142319		At1g12860	basic helix-loop-helix (bHLH) family protein / F-box family protein contains Pfam profiles: PF00646 F-box domain, PF00010 helix-loop-helix DNA-binding domain
A003111_01	At1g12790	0.179	0.282	-0.376	-0.179		-0.181	-0.282	-0.138	-0.158		-0.165	-0.196	-0.168	0.068	-0.174		0	-0.0235	0.307014		-0.17	-0.18975	0.0639603		-0.168	-0.127	0.109681		At1g12790	expressed protein
A003112_01	At1g27385	0.247	0.112	-0.229	-0.02	0	-0.2	-0.083	0.058	0.149	-0.243	0.023	-0.166	-0.01	-0.119	0.09		0	0.022	0.17605		-0.083	-0.0638	0.166696		-0.01	-0.0364	0.104668		At1g27385	expressed protein
A003113_01	At1g25420	-0.006	0.253	0	-0.001	0.316	-0.035	0.053	0.13	0.129	0.209	0.088	0.12	0.073	0.037	0.119		0	0.1124	0.158692		0.129	0.0972	0.0922182		0.088	0.0874	0.0346742		At1g25420	expressed protein contains Pfam profile: PF03398 eukaryotic protein of unknown function, DUF292
A003114_01	At1g19450	0.137	-0.046	-0.323	0	0.038	0.176	0.272	-0.073	-0.102	-0.839	0.304	0.134	0.148	0.101	0.169		0	-0.0388	0.172577		-0.073	-0.1132	0.436046		0.148	0.1712	0.0782477		At1g19450	integral membrane protein, putative / sugar transporter family protein similar to GB:U43629 GI:1209756 integral membrane protein from [Beta vulgaris]; contains Pfam profile PF00083: major facilitator superfamily protein; contains TIGRfam TIGR00879: Sugar
A003115_01	At1g27480	0.169	0.196	-1.196	-0.043	0	-0.532	-0.25	-0.267	-0.702		-0.057	-0.08	-0.098	-0.119	0.293		0	-0.1748	0.580187		-0.399	-0.43775	0.218416		-0.08	-0.0122	0.172133		At1g27480	lecithin:cholesterol acyltransferase family protein / LACT family protein similar to LCAT-like lysophospholipase (LLPL) [Homo sapiens] GI:4589720; contains Pfam profile PF02450: Lecithin:cholesterol acyltransferase (phosphatidylcholine-sterol acyltransfer
A003117_01	At1g29820	0.183	0.095	0	-0.021	-0.085	0.146	-0.146	0.135	-0.127	0.179	-0.258	-0.057	-0.118	-0.103	-0.354		0	0.0344	0.105194		0.135	0.0374	0.159713		-0.118	-0.178	0.123736		At1g29820	expressed protein
A003119_01	At1g55170	0	0.03	-0.332	0.035	-0.452	0.062	0.183	0.311	0.199	-0.493	0.287	0.517	0.247	0.098	-0.042		0	-0.1438	0.230901		0.183	0.0524	0.317402		0.247	0.2214	0.210324		At1g55170	expressed protein
A003121_01	At1g55110	-0.33	-0.126	0.138	0.194	0	-0.097	-0.182	-0.275	-0.234	-0.039	0.07	-0.031	-0.216	-0.191	0.185		0	-0.0248	0.211176		-0.182	-0.1654	0.097017		-0.031	-0.0366	0.170679		At1g55110	zinc finger (C2H2 type) family protein contains Pfam domain, PF00096: Zinc finger, C2H2 type
A003123_01	At1g19170	0.108	0.091	-0.041	0	-0.013	0.024	-0.093	0.089	0.068	-0.475	-0.196	0.05	0.052	0.183	-0.331		0	0.029	0.0663136		0.024	-0.0774	0.233153		0.05	-0.0484	0.209139		At1g19170	glycoside hydrolase family 28 protein / polygalacturonase (pectinase) family protein low similarity to SP|P27644 Polygalacturonase (EC 3.2.1.15) (Pectinase) {Agrobacterium tumefaciens}; contains PF00295: Glycosyl hydrolases family 28
A003124_01	At1g19200	0.452	0	-0.516	-0.414	0.165	-0.824	-0.806	-0.162	-0.216	-1.064	0.176	-0.637	-0.043	-0.068	-0.376		0	-0.0626	0.402985		-0.806	-0.6144	0.401924		-0.068	-0.1896	0.31814		At1g19200	senescence-associated protein-related similar to senescence-associated protein SAG102 (GI:22331931) [Arabidopsis thaliana];
A003130_01	At1g30090	0	0.131	-1.016	0.143	-0.054	-0.035	0.098	0.217	-0.107	-1.9	0.283	0.457	0.165	0.363	-0.052		0	-0.1592	0.486328		-0.035	-0.3454	0.877904		0.283	0.2432	0.19679		At1g30090	kelch repeat-containing F-box family protein similar to SP|O95198 Kelch-like protein 2 (Actin-binding protein Mayven) {Homo sapiens}; contains Pfam profiles PF01344: Kelch motif, PF00646: F-box domain
A003131_01	At1g49180	0	0.203	-0.048	-0.349	0.043	-0.137	0.02	-0.257	-0.316	-1.253	-0.07	0.363	0.109	0.263	0.019		0	-0.0302	0.20162		-0.257	-0.3886	0.500008		0.109	0.1368	0.176429		At1g49180	protein kinase family protein contains eukaryotic protein kinase domain, INTERPRO:IPR000719
A003132_01	At1g50040	0.193	-0.193	-1.203		0.243	0.64	0.72	0.994	0.523	-1.225	1.089	0.916	0.777	0.785	1.079		0	-0.24	0.670909		0.64	0.3304	0.886618		0.916	0.9292	0.151747		At1g50040	expressed protein
A003134_01	At1g26440	-0.005	0.212	0.425	0	-0.045	0.115	0.286	0.335	0.382	0.762	-0.122	0.284	0.253	0.313	-0.066		0	0.1174	0.199189		0.335	0.376	0.238188		0.253	0.1324	0.208701		At1g26440	expressed protein similar to SP|Q41706 A3 protein (unknown function) {Vigna unguiculata}
A003137_01	At1g25350	0	-0.108	0.067	0.063	-0.18	-0.075	-0.173	-0.439	0.051	-0.024	-0.023	-0.113	0.051	0.157	-0.011		0	-0.0316	0.109006		-0.075	-0.132	0.189955		-0.011	0.0122	0.099906		At1g25350	glutamine-tRNA ligase, putative / glutaminyl-tRNA synthetase, putative / GlnRS, putative similar to tRNA-glutamine synthetase GI:2995454 from [Lupinus luteus]
A003138_01	At1g78570	0	-0.017	-0.815	0.119	0.018	-0.018	-0.079	-0.15	0.243	-0.699	0.049	-0.302	-0.311	-0.174	-0.278		0	-0.139	0.381574		-0.079	-0.1406	0.345642		-0.278	-0.2032	0.151191		At1g78570	NAD-dependent epimerase/dehydratase family protein similar to dTDP-glucose 4,6-dehydratase from Aneurinibacillus thermoaerophilus GI:16357461, RmlB from Leptospira borgpetersenii GI:4234803; contains Pfam profile PF01370 NAD dependent epimerase/dehydratas
A003141_01	At1g21065	0	-0.01	0.063	-0.196	0.043	-0.238	-0.285	0.039	0.005	-0.337	-0.422	-0.298	-0.197	-0.341	-0.329		0	-0.02	0.102876		-0.238	-0.1632	0.17307		-0.329	-0.3174	0.0814021		At1g21065	expressed protein
A003142_01	At1g49170	-0.177	-0.086	0.185	0	0.109	-0.093	-0.029	0.11	-0.077	0.324	0.273	0.266	0.176	0.073	0.522		0	0.0062	0.145464		-0.029	0.047	0.174248		0.266	0.262	0.166474		At1g49170	expressed protein
A003144_01	At1g56300	-0.345	0.129	0	0.362	-0.246	1.133	1.203	1.419	1.643	1.831	1.341	1.086			1.299		0	-0.02	0.285143		1.419	1.4458	0.29359		1.299	1.242	0.136722		At1g56300	DNAJ heat shock N-terminal domain-containing protein similar to SP|Q9QYI7 DnaJ homolog subfamily B member 8 Mus musculus; contains Pfam profile: PF00226: DnaJ domain
A003154_01	At1g61870	0	0.227	0.003	-0.303	-1.117	0.675	0.466	-0.198	0.111	-0.777	0.425	0.641	0.139	0.336	-0.045		0	-0.238	0.526264		0.111	0.0554	0.572863		0.336	0.2992	0.263697		At1g61870	pentatricopeptide (PPR) repeat-containing protein contains Pfam profile PF01535: PPR repeat
A003156_01	At1g16670	0.137	0.27	-0.173	0	-0.025	0.249	0.052	0.561	1.006	-0.154	-0.025	0.438	0.239	0.176	-0.205		0	0.0418	0.168439		0.249	0.3428	0.454868		0.176	0.1246	0.24747		At1g16670	protein kinase family protein contains protein kinase domain, Pfam:PF00069; similar to receptor-like serine/threonine kinase GI:2465923 from [Arabidopsis thaliana]
A003158_01	At1g49000	0.388	0	-0.544	-0.05	0.546	0.303	0.247	0.929	1.265	1.509	0.678	0.352	0.692	0.484	0.694		0	0.068	0.425434		0.929	0.8506	0.564704		0.678	0.58	0.155197		At1g49000	expressed protein
A003161_01	At1g01770		0.725	-0.013	0.013	-0.334	-0.035	-0.056	-0.262	-0.139		-0.191	-0.161	-0.189	0.497	-0.321		0	0.09775	0.446952		-0.097	-0.123	0.102972		-0.189	-0.073	0.324626		At1g01770	expressed protein
A003164_01	At1g01230	0	0.038	-0.307	-0.1	0.024	0.002	0.13	0.225	0.034	-0.458	0.091	0.247	-0.025	0.106	0.223		0	-0.069	0.143583		0.034	-0.0134	0.263416		0.106	0.1284	0.110054		At1g01230	ORMDL family protein contains Pfam domain PF04061: ORMDL family
A003165_01	At1g66160	0	-0.044	0.353	-0.424	0.307	1.557	1.166	1.884	2.608	0.977	1.569	0.568	1.995	0.839	0.538		0	0.0384	0.313527		1.557	1.6384	0.645694		0.839	1.1018	0.649607		At1g66160	U-box domain-containing protein similar to immediate-early fungal elicitor protein CMPG1 [Petroselinum crispum] GI:14582200; contains Pfam profile PF04564: U-box domain
A003170_01	At1g52730	0.108	0	0.593	-0.198	-0.015	0.14	0.155	0.124	0.17	0.378	-0.068	0.103	0.146	0.091	0.027		0	0.0976	0.297957		0.155	0.1934	0.104603		0.091	0.0598	0.0831847		At1g52730	transducin family protein / WD-40 repeat family protein contains 7 WD-40 repeats (PF00400); similar to UNR-interacting protein (WD-40 repeat protein PT-WD) (SP:Q9Y3F4) [Homo sapiens]
A003174_01	At1g13640	-0.361	0	-0.065	0.162	0.015	-0.09	-0.167	-0.205	-0.413	-0.244	0.087	0.009	-0.061	-0.12	0.114		0	-0.0498	0.192753		-0.205	-0.2238	0.12009		0.009	0.0058	0.0982329		At1g13640	phosphatidylinositol 3- and 4-kinase family protein low similarity to phosphatidylinositol 4-kinase type-II beta [Homo sapiens] GI:20159767; contains Pfam profile PF00454: Phosphatidylinositol 3- and 4-kinase
A003176_01	At1g49600	-0.075	-0.075	0.043	0	0.104	0.072	0.088	-0.211	-0.418	-0.678	-0.097	0.16	-0.269	-0.039	0.275		0	-0.0006	0.0773195		-0.211	-0.2294	0.327389		-0.039	0.006	0.214672		At1g49600	RNA-binding protein 47 (RBP47), putative similar to DNA binding protein ACBF GB:U90212 GI:1899187 from [Nicotiana tabacum]
A003181_01	At1g72090	0.075	0	0.127	-0.134	-0.303	0.495	0.369	-0.118	0.002	0.225	0.259	0.153	0.167	0.067	0.428		0	-0.047	0.173547		0.225	0.1946	0.253176		0.167	0.2148	0.137256		At1g72090	radical SAM domain-containing protein / TRAM domain-containing protein contains Pfam profiles PF00919: UPF0004 family protein, PF04055: radical SAM domain protein, PF01938: TRAM domain
A003183_01	At1g18630	0.32	0	-0.391	0.112	-0.109	-0.035	0.092	-0.067	0.328	0.537	-0.297	-0.325	-0.225	0.324	-0.044		0	-0.0136	0.263999		0.092	0.171	0.256869		-0.225	-0.1134	0.267896		At1g18630	glycine-rich RNA-binding protein, putative similar to glycine-rich RNA-binding protein from {Sorghum bicolor} SP|Q99070, GI:1778373 from [Pisum sativum]; contains InterPro entry IPR000504: RNA-binding region RNP-1 (RNA recognition motif) (RRM)
A003184_01	At1g72050	0	0.148	-0.337	0.151	-0.069	0.471	0.387	-0.094	0.144	-0.441	0.65	0.503	0.29	0.467	0.637		0	-0.0214	0.200465		0.144	0.0934	0.371499		0.503	0.5094	0.14665		At1g72050	zinc finger (C2H2 type) family protein contains multiple zinc finger domains: PF00096: Zinc finger, C2H2 type
A003185_01	At1g34575	-0.025	0.015	0.416	-0.673	0	-0.171	-0.334	-0.742	-0.302	-0.685	-1.324	-1.444	-1.766	-1.344	-1.741		0	-0.0534	0.391337		-0.334	-0.4468	0.251813		-1.444	-1.5238	0.21474		At1g34575	FAD-binding domain-containing protein similar to SP|P30986 reticuline oxidase precursor (Berberine-bridge-forming enzyme) (BBE) (Tetrahydroprotoberberine synthase) [Eschscholzia californica]; contains PF01565 FAD binding domain
A003186_01	At1g67070	-0.059	0.087	0.252	0	-0.098	0.239	-0.182	0.15	-0.061	0.274	0.118	0.07	-0.241	-0.103	0.296		0	0.0364	0.139224		0.15	0.084	0.19765		0.07	0.028	0.206888		At1g67070	phosphomannose isomerase, putative (DIN9) contains Pfam profile: PF01238 phosphomannose isomerase type I ;similar to phosphomannose isomerase GI:10834550 from [Arabidopsis thaliana]; identical to cDNA phosphomannose isomerase (din9) partial cds GI:1083454
A003187_01	At1g73480	-0.123	0.126	-0.862	0.297	0	-0.313	-0.429	-0.253	-0.632	-0.869	-0.132	-0.051	-0.531	-0.454	0.034		0	-0.1124	0.446959		-0.429	-0.4992	0.25229		-0.132	-0.2268	0.251031		At1g73480	hydrolase, alpha/beta fold family protein low similarity to monoglyceride lipase from [Homo sapiens] GI:14594904, [Mus musculus] GI:2632162; contains Pfam profile PF00561: hydrolase, alpha/beta fold family
A003190_01	At1g60000	0.15	0	-0.345	0.001	-0.084	-0.217	-0.237	-0.55	-0.872	-0.722	-0.67	-0.32	-0.531	-0.526	-0.387		0	-0.0556	0.182432		-0.55	-0.5196	0.290476		-0.526	-0.4868	0.13678		At1g60000	29 kDa ribonucleoprotein, chloroplast, putative / RNA-binding protein cp29, putative similar to 29 kDa ribonucleoprotein chloroplast precursor {Nicotiana sylvestris} SP|Q08935, SP|Q08937; contains InterPro entry IPR000504: RNA-binding region RNP-1 (RNA re
A003194_01	At1g18490	0	0.121	0.623	-0.286	-0.087	-0.102	0.039	0.156	0.114	0.44	-0.344	-0.25	0.157	0.065	-0.087		0	0.0742	0.34081		0.114	0.1294	0.199459		-0.087	-0.0918	0.20925		At1g18490	expressed protein
A003197_01	At1g54500	0	-0.19	0.157	-0.147	0.006	-0.43	-0.495	-0.64	-0.615	-0.261	-0.622	-0.625	-0.476	-0.709	-0.405		0	-0.0348	0.138147		-0.495	-0.4882	0.15344		-0.622	-0.5674	0.123569		At1g54500	rubredoxin family protein similar to SP|P00270 Rubredoxin (Rd) {Desulfovibrio gigas}; contains Pfam profile PF00301: Rubredoxin
A003198_01	At1g08460	0	-0.04	-0.646	0.138	0.161	0.146	0.104	0.062	-0.016	-0.044	0.025	0.156	-0.176	-0.209	-0.102		0	-0.0774	0.329366		0.062	0.0504	0.0797922		-0.102	-0.0612	0.151075		At1g08460	histone deacetylase family protein (HDA8) identical to HDA8 [Arabidopsis thaliana] GI:21360988low similarity to SP|Q9Z2V5 Histone deacetylase 6 (HD6) (Histone deacetylase mHDA2) {Mus musculus}; contains Pfam profile PF00850: Histone deacetylase family; su
A003199_01	At1g49150	0	-0.025	-0.97	0.136	0.054	-0.307	-0.206	-0.328	-0.272	-0.724	-0.434	-0.297	-0.626	-0.611	-0.099		0	-0.161	0.456435		-0.307	-0.3674	0.204643		-0.434	-0.4134	0.22196		At1g49150	hypothetical protein
A003200_01	At1g12550	0.004	0	-0.401	-0.03	0.072	-0.215	-0.262	-0.101	-0.081		-0.36	-0.13	-0.367	-0.317	0.015		0	-0.071	0.188213		-0.158	-0.16475	0.0876751		-0.317	-0.2318	0.168261		At1g12550	oxidoreductase family protein similar to glyoxylate reductase from Homo sapiens (gi:6002730); contains Pfam D-isomer specific 2-hydroxyacid dehydrogenase, NAD binding domain PF02826
A003201_01	At1g01640	-0.177	0.194	0.177		-0.564	0.61	0.713	0.491	0.558	0.637	1.054	0.882	1.084	1.021	1.315		0	-0.0925	0.357848		0.61	0.6018	0.0834668		1.054	1.0712	0.156696		At1g01640	speckle-type POZ protein-related contains Pfam profile:PF00651 BTB/POZ domain; similar to Speckle-type POZ protein (SP:O43791) [Homo sapiens]
A003203_01	At1g31580	-0.107	0.222	0	-0.451	0.218	0.324	-0.116	-0.371	0.045	1.073	-0.165	0.418	-0.354	0.049	-0.033		0	-0.0236	0.277882		0.045	0.191	0.553855		-0.033	-0.017	0.286928		At1g31580	expressed protein identical to ORF1 [Arabidopsis thaliana] gi|457716|emb|CAA50905
A003208_01	At1g49950	0.102	0.227	-0.847	0	-0.016	0.331	0.121	0.36	0.217	-0.994	0.411	0.347	0.124	0.208	0.011		0	-0.1068	0.42502		0.217	0.007	0.567601		0.208	0.2202	0.16252		At1g49950	DNA-binding protein, putative contains similarity to DNA-binding protein PcMYB1 [Petroselinum crispum] gi|2224899|gb|AAB61699
A003214_01	At1g65650	0.026	0	0.085	-0.032	-0.039	0.061	0.127	0.089	0.033	0.033	0.196	0.334	0.035	0.061	0.191		0	0.008	0.050314		0.061	0.0686	0.04006		0.191	0.1634	0.120313		At1g65650	ubiquitin carboxyl-terminal hydrolase family 1 protein similar to 26S proteasome regulatory complex subunit p37A [Drosophila melanogaster] GI:6434962; contains Pfam profile PF01088: Ubiquitin carboxyl-terminal hydrolase, family 1
A003217_01	At1g53210	0	-0.034	-0.238	0.127	0.068	0.348	0.225	0.353	0.515	0.484	0.167	-0.286	-0.046	-0.157	-0.031		0	-0.0154	0.139075		0.353	0.385	0.116934		-0.046	-0.0706	0.167697		At1g53210	sodium/calcium exchanger family protein / calcium-binding EF hand family protein contains Pfam profiles: PF01699 sodium/calcium exchanger protein, PF00036 EF hand
A003218_01	At1g13820	0.074	0.044	0	-0.208	-0.002	-0.631	-0.378	-0.386	-0.295	-0.142	-0.763	-0.855	-0.28	-0.432	-0.684		0	-0.0184	0.110665		-0.378	-0.3664	0.177472		-0.684	-0.6028	0.239392		At1g13820	hydrolase, alpha/beta fold family protein contains Pfam profile PF00561: hydrolase, alpha/beta fold family
A003222_01	At1g41830	-0.35	0	-0.626	0.232	0.181	0.003	0.03	-0.077	-0.19	0.082	0.284	0.324	-0.054	-0.011	0.367		0	-0.1126	0.366595		0.003	-0.0304	0.106115		0.284	0.182	0.198581		At1g41830	multi-copper oxidase type I family protein similar to pollen-specific BP10 protein [SP|Q00624][Brassica napus]; contains Pfam profile: PF00394 Multicopper oxidase
A003229_01	At1g24120	0.029	0.058	-0.859	-0.167	0	0.043	0.047	-0.143	-0.451		-0.128	0.104	-0.342	-0.251	-0.317		0	-0.1878	0.385237		-0.05	-0.126	0.234097		-0.251	-0.1868	0.182471		At1g24120	DNAJ heat shock protein, putative similar to Altered Response to Gravity [Arabidopsis thaliana] GI:4249662; contains Pfam profile PF00226 DnaJ domain
A003235_01	At1g04690	-0.019	0.091	-0.861	0.075	0	0.298	0.244	0.158	0.361	-0.978	0.387	0.498	0.323	0.455	0.22		0	-0.1428	0.404237		0.244	0.0166	0.560966		0.387	0.3766	0.109988		At1g04690	potassium channel protein, putative nearly identical to K+ channel protein [Arabidopsis thaliana] GI:1063415; contains Pfam profile PF00248: oxidoreductase, aldo/keto reductase family
A003236_01	At1g62940	-2.675	2.214	3.795	-2.214		4.376	0.668		-1.124	-0.55	0.936	0.085	-0.514	0.288	1.456		0	0.28	3.21702		0.059	0.8425	2.47132		0.288	0.4502	0.764362		At1g62940	4-coumarate--CoA ligase family protein / 4-coumaroyl-CoA synthase family protein similar to gi:112801 from Petroselinum crispum, GB:AAD40664 from [Solanum tuberosum] (J. Biol. Chem. 266 (13), 8551-8559 (1991)); contains Pfam AMP-binding enzyme domain PF00
A003237_01	At1g19380	0.185	-0.16	-0.867	0	0.162	1.671	1.626	2.525	2.883	2.952	1.474	0.49	1.917	0.595	1.13		0	-0.136	0.431647		2.525	2.3314	0.644322		1.13	1.1212	0.59857		At1g19380	expressed protein
A003241_01	At1g10870	-0.085	-0.19	0.397	0.09	0	-0.188	-0.424	-0.25	0.023	0.416	-0.729	-0.567	-0.425	-0.248	-0.368		0	0.0424	0.223632		-0.188	-0.0846	0.322265		-0.425	-0.4674	0.185856		At1g10870	ARF GTPase-activating domain-containing protein
A003242_01	At1g80300	-0.115	-0.016	0.287	0.666	0	-0.002	-0.189	-0.218	-0.136	0.243	0.207	-0.04	-0.165	-0.203	0.079		0	0.1644	0.317911		-0.136	-0.0604	0.188781		-0.04	-0.0244	0.170402		At1g80300	chloroplast ADP, ATP carrier protein 1 / ADP, ATP translocase 1 / adenine nucleotide translocase 1 (AATP1) identical to SP|Q39002 Chloroplast ADP,ATP carrier protein 1, chloroplast precursor (ADP/ATP translocase 1) (Adenine nucleotide translocase 1) {Arab
A003245_01	At1g24450	-0.122	0	0.369	-0.362	0.031	0.356	0.339	0.319	-0.032	0.279	0.298	0.319	0.272	0.292	0.47		0	-0.0168	0.265348		0.319	0.2522	0.161446		0.298	0.3302	0.0799262		At1g24450	ribonuclease III family protein contains similarity to Swiss-Prot:P51837 ribonuclease III (EC 3.1.26.3) (RNase III) [Coxiella burnetii]
A003253_01	At1g33330	0	-0.097	0.463	-0.089	0.01	0.393	0.333	0.34	0.188	0.404	0.332	0.536	0.258	0.246	0.267		0	0.0574	0.232016		0.34	0.3316	0.086176		0.267	0.3278	0.121063		At1g33330	peptide chain release factor, putative similar to peptide chain release factor 2 [Campylobacter jejuni] GI:6469929; contains Pfam profile PF00472: Peptidyl-tRNA hydrolase domain
A003262_01	At1g07630	-0.095	0	-1.086	0.108	0.341	-0.342	-0.122	-0.046	0.296	-0.993	-0.258	0.322	-0.217	-0.255	-0.388		0	-0.1464	0.549818		-0.122	-0.2414	0.478607		-0.255	-0.1592	0.276669		At1g07630	protein phosphatase 2C family protein / PP2C family protein similar to protein phosphatase-2c (GI:3608412) [Mesembryanthemum crystallinum]; contains Pfam PF00481 : Protein phosphatase 2C domain
A003264_01	At1g64720	-0.155	0.252	0.055	0	-0.326	-0.15	0.005	-0.042	-0.144	-0.228	-0.196	-0.265	0.01	-0.073	-0.409		0	-0.0348	0.218389		-0.144	-0.1118	0.0928881		-0.196	-0.1866	0.163748		At1g64720	expressed protein weak similarity to SP|P53809 Phosphatidylcholine transfer protein (PC-TP) {Rattus norvegicus}
A003265_01	At1g07840	0.126	0.205	-0.457	0	-0.008	0.189	0.036	0.037	0.072	-1.136	0.293	0.435	0.222	0.331	0.017		0	-0.0268	0.256526		0.037	-0.1604	0.548959		0.293	0.2596	0.155922		At1g07840	leucine zipper factor-related similar to charged amino acid rich leucine zipper factor-1 (GI:12061569) {Mus musculus}
A003266_01	At1g55920	0.031	0	-0.982	0.731	-0.031	0.265	0.485	0.429	0.618	0.262	0.898	0.851	0.629	0.554	0.614		0	-0.0502	0.609919		0.429	0.4118	0.151792		0.629	0.7092	0.154382		At1g55920	serine O-acetyltransferase, putative identical to GI:608677 from [Arabidopsis thaliana]
A003271_01	At1g01440	0.111	-0.15	-0.478	0.439	0	-0.093	-0.29	0.197	-0.044	-0.925	-0.225	-0.045	-0.386	-0.25	0.012		0	-0.0156	0.337198		-0.093	-0.231	0.424945		-0.225	-0.1788	0.161588		At1g01440	extra-large G-protein-related weak similarity to extra-large G-protein (AtXLG1) (GI:3201682) [Arabidopsis thaliana]
A003274_01	At1g30610	0.256	0	0.676	-0.072	-0.111	-0.341	-0.248	-0.261	-0.357	0.477	-0.689	-0.454	-0.186	-0.153	-0.543		0	0.1498	0.327039		-0.261	-0.146	0.351534		-0.454	-0.405	0.231066		At1g30610	pentatricopeptide (PPR) repeat-containing protein contains Pfam profile PF01535: PPR repeat
A003276_01	At1g11860	0.075	-0.063	-1.133	0.081	0	-0.569	-0.518	-0.405	-0.77	-1.765	-0.849	-0.63	-0.919	-0.775	-0.824		0	-0.208	0.520462		-0.569	-0.8054	0.552469		-0.824	-0.7994	0.108006		At1g11860	aminomethyltransferase, putative similar to aminomethyltransferase, mitochondrial precursor SP:O49849 from [Flaveria anomala]
A003277_01	At1g61670	0	0.087	0.249	-0.037	-0.101	0.254	0.185	0.023	0.249	0.327	0	0.155	0.124	-0.048	0.22		0	0.0396	0.135369		0.249	0.2076	0.114795		0.124	0.0902	0.111158		At1g61670	expressed protein similar to membrane protein PTM1 precursor isolog GI:1931644 from [Arabidopsis thaliana]
A003278_01	At1g24260	-0.353	0.881	0.869	0	-0.661	2.127	1.841	-0.412	1.054	-0.059	1.14	0.657	-0.485	-0.346	0.356		0	0.1472	0.704364		1.054	0.9102	1.12419		0.356	0.2644	0.68253		At1g24260	MADS-box protein (AGL9) strongly similar to GB:O22456, MADS-box protein, Location of EST gb|H37053
A003280_01	At1g28060		-0.083	0.083	-0.131	0.475	-0.291	-0.225	-0.084	0.016		-0.205	-0.025	0.02	0.302	-0.044		0	0.086	0.275064		-0.154	-0.146	0.138268		-0.025	0.0096	0.184207		At1g28060	small nuclear ribonucleoprotein family protein / snRNP family protein contains similarity to U4/U6 small nuclear ribonucleoprotein hPrp3 [Homo sapiens] gi|2708307|gb|AAC51926
A003281_01	At1g79830	-0.22	-0.08	0.247	0.633	0	-0.011	0.12	0.238	0.07	0.725	0.304	0.038	0.062	0.182	0.609		0	0.116	0.335119		0.12	0.2284	0.291915		0.182	0.239	0.232435		At1g79830	expressed protein weak similarity to TATA element modulatory factor (TMF) (Swiss-Prot:P82094) [Homo sapiens]
A003286_01	At1g19310	0	-0.077	-0.553	0.311	0.468	0.246	0.302	0.328	0.283	0.14	0.236	0.224	-0.001	-0.152	0.535		0	0.0298	0.394665		0.283	0.2598	0.0733362		0.224	0.1684	0.261443		At1g19310	zinc finger (C3HC4-type RING finger) family protein contains Pfam profile: PF00097 zinc finger, C3HC4 type (RING finger)
A003287_01	At1g56500	0	-0.088	-0.226	0.141	0.036	-1.042	-0.968	-0.403	-0.64	-1.222	-1.233	-1.23	-0.871	-0.752	-1.212		0	-0.0274	0.138061		-0.968	-0.855	0.328997		-1.212	-1.0596	0.230498		At1g56500	haloacid dehalogenase-like hydrolase family protein low similarity to SP|P95649 CbbY protein {Rhodobacter sphaeroides}; contains InterPro accession IPR005834: Haloacid dehalogenase-like hydrolase
A003290_01	At1g01260	0	0.015	-0.829	0.357	-0.023	0.201	-0.192	0.438	0.498	-0.112	0.043	0.124	0.076	0.189	-0.014		0	-0.096	0.438567		0.201	0.1666	0.312602		0.076	0.0836	0.0774164		At1g01260	basic helix-loop-helix (bHLH) family protein contains Pfam profile: PF00010 helix-loop-helix DNA-binding domain
A003291_01	At1g58290	0.157	-0.048	-1.122	0	0.047	-0.595	-0.6	-0.714	-0.799	-2.198	-0.682	-0.591	-0.713	-0.724	-0.912		0	-0.1932	0.524742		-0.714	-0.9812	0.685503		-0.713	-0.7244	0.117172		At1g58290	glutamyl-tRNA reductase 1 / GluTR (HEMA1) identical to glutamyl-tRNA reductase 1, chloroplast [SP|P42804]
A003295_01	At1g47980	-0.189	2.342	4.764	0	-0.543	4.667	3.27	-0.36	0.695	0.19	1.29	1.439	1.016	1.226	2.462		0	1.2748	2.25752		0.695	1.6924	2.16803		1.29	1.4866	0.566061		At1g47980	expressed protein
A003299_01	At1g73885	0.147	0.072	-0.092	-0.007	0	0.089	-0.058	-0.013	-0.149	-0.571	0.046	0.051	-0.015	-0.143	0.021		0	0.024	0.0900361		-0.058	-0.1404	0.255507		0.021	-0.008	0.0798624		At1g73885	expressed protein
A003301_01	At1g52310	0.127	0.255	-0.314	0	-0.081	0.083	0.114	0.053	-0.239	-1.088	-0.093	0.238	0.132	0.123	-0.251		0	-0.0026	0.215799		0.053	-0.2154	0.507832		0.123	0.0298	0.197741		At1g52310	protein kinase family protein / C-type lectin domain-containing protein contains protein kinase domain, Pfam:PF00069, PF00059 Lectin C-type domain
A003304_01	At1g27520	-0.107	0	-0.242	0.184	0.027	-0.074	-0.192	-0.203	-0.207		-0.063	0.012	-0.247	-0.1	-0.005		0	-0.0276	0.158737		-0.197	-0.169	0.0636501		-0.063	-0.0806	0.103278		At1g27520	glycoside hydrolase family 47 protein Similar to gb|U04299 mannosyl-oligosaccharide alpha-1,2-mannosidase from Mus musculus. ESTs gb|R84145 and gb|AA394707 come from this gene
A003307_01	At1g30640	0.168	0.211	0	-0.061	-0.162	0.343	0.347	0.752	1.013	-0.56	0.389	0.386	0.609	0.656	0.259		0	0.0312	0.156399		0.347	0.379	0.596893		0.389	0.4598	0.166984		At1g30640	protein kinase, putative contains protein kinase domain, Pfam:PF00069
A003311_01	At1g55340	0.111	0.034	-0.473	-0.174	0	0.255	0.255	-0.064	-0.49	-1.622	-0.004	0.211	-0.08	0.008	-0.167		0	-0.1004	0.23296		-0.064	-0.3332	0.782627		-0.004	-0.0064	0.140254		At1g55340	expressed protein
A003312_01	At1g06050	0.002	0	-0.861	-0.47	0.035	-0.304	-0.555	-0.252	-0.312	-1.161	-0.288	-0.134	-0.496	-0.218	-0.316		0	-0.2588	0.39641		-0.312	-0.5168	0.378748		-0.288	-0.2904	0.134755		At1g06050	expressed protein
A003317_01	At1g27850	0	-0.122	0.566	0.088	-0.888	0.012	-0.138	0.131	-0.075	0.387	0.373	0.159	0.387	0.2	0.178		0	-0.0712	0.525876		0.012	0.0634	0.20715		0.2	0.2594	0.111154		At1g27850	expressed protein similar to En/Spm-like transposon protein GB:AAB95292 GI:2088658 from [Arabidopsis thaliana]
A003325_01	At1g78310	0.047	-0.156	0	0.197	-0.055	0.372	0.45	0.493	0.585	1.31	0.758	0.77	0.687	0.525	1.111		0	0.0066	0.130539		0.493	0.642	0.38126		0.758	0.7702	0.21409		At1g78310	VQ motif-containing protein contains PF05678: VQ motif
A003327_01	At1g78480	-0.085	0.444	0.866	-0.166	0	-0.26	0.099	-0.04	-0.302	0.519	-0.179		-0.347	0.173	-0.596		0	0.2118	0.435194		-0.04	0.0032	0.33148		-0.263	-0.23725	0.32272		At1g78480	prenyltransferase/squalene oxidase repeat-containing protein similar to beta-Amyrin Synthase GI:3688600 from [Panax ginseng]
A003329_01	At1g63090	0.069	-0.083	-0.495	0	0.068	0.185	0.14	0.148	0.561	0.579	0.587	0.215	0.603	0.411	0.672		0	-0.0882	0.235798		0.185	0.3226	0.226571		0.587	0.4976	0.184986		At1g63090	F-box family protein / SKP1 interacting partner 3-related contains Pfam profile PF00646: F-box domain
A003330_01	At1g74680	0.006	0.268	-0.394	-0.218	0	-0.348	-0.147	0.385	0.402	-0.923	-0.132	0.151	0.167	0.277	-0.304		0	-0.0676	0.250884		-0.147	-0.1262	0.553362		0.151	0.0318	0.240937		At1g74680	exostosin family protein contains Pfam profile: PF03016 Exostosin family
A003334_01	At1g33760	0.005	0.009	-0.133	0	-0.119	0.441	0.329	0.335	0.206	0.454	0.375	0.117	0.392	0.255	0.474		0	-0.0476	0.0718109		0.335	0.353	0.100566		0.375	0.3226	0.139037		At1g33760	AP2 domain-containing transcription factor, putative similar to TINY GB: CAA64359 GI:1246403 from [Arabidopsis thaliana]; contains Pfam profile PF00847: AP2 domain
A003335_01	At1g12560	-0.304	0	0.333			-0.733	-0.457	0.215	-0.06	0.402	-0.087	-0.147	0.464	0.371	-0.658		0	0.00966667	0.31861		-0.06	-0.1266	0.468356		-0.087	-0.0114	0.451229		At1g12560	expansin, putative (EXP7) similar to expansin GI:2828241 from [Brassica napus]; alpha-expansin gene family, PMID:11641069
A003337_01	At1g52760	0.128	0	0.15	-0.228	-0.081	0.325	0.177	0.084	0.107	-0.375	0.065	0.427	0.126	0.26	0.276		0	-0.0062	0.155914		0.107	0.0636	0.262612		0.26	0.2308	0.1413		At1g52760	esterase/lipase/thioesterase family protein low similarity to monoglyceride lipase from [Homo sapiens] GI:14594904, [Mus musculus] GI:2632162; contains Interpro entry IPR000379
A003338_01	At1g63150	-0.098	0.098	0.539		-0.424	0.184	0.338	0.24	0.076		0.204	0.154	0.507	0.308	0.174		0	0.02875	0.402575		0.212	0.2095	0.109415		0.204	0.2694	0.145464		At1g63150	pentatricopeptide (PPR) repeat-containing protein contains Pfam profile PF01535: PPR repeat
A003339_01	At1g63050	0.14	0.086	-0.455	0	-0.248	-0.076	-0.152	-0.411	-0.298	-0.878	-0.403	-0.191	-0.387	-0.197	-0.637		0	-0.0954	0.25001		-0.298	-0.363	0.315691		-0.387	-0.363	0.183298		At1g63050	membrane bound O-acyl transferase (MBOAT) family protein low similarity to porcupine from [Xenopus laevis] GI:6714514, GI:6714520, GI:6714518, GI:6714516; contains Pfam profile PF03062: MBOAT family
A003340_01	At1g30890	0.288	0	-0.107	-0.039	0.178	0.001	-0.016	0.35	0.215		0.247	-0.006	0.181	0.005	0.281		0	0.064	0.163644		0.108	0.1375	0.176406		0.181	0.1416	0.134666		At1g30890	integral membrane HRF1 family protein contains Pfam domain PF03878: Hrf1 family
[truncated: 12,472 more rows]
