# Supplementary material for: Virus Adaptation by Manipulation of Host's Gene Expression
Source: PLoS One. 2008 Jun 11;3(6):e2397. doi: 10.1371/journal.pone.0002397 (PMC2398778; doi:10.1371/journal.pone.0002397)
Supplement: Table S2 — Significantly up-regulated genes between TEV- and TEV-At17-infected plants. Genes were ordered based on the score in SAM output with a FDR of 5.38% (533 spots, corresponding with 496 genes). (0.49 MB XLS) [file pone.0002397.s003.xls]

## Sheet: Differential Upregulated
Differentially (SAM FDR 5%) upregulated genes between TEV and TEV-AT infected plants
id	Score(d) Up 5%	Numerator(r)	Denominator(s+s0)	Fold Change	q-value(%)		Oligo ID	Gene AGI	Mock 1	Mock 2	Mock 3	Mock 4	Mock 5	TEV 1	TEV 2	TEV 3	TEV 4	TEV 5	TEV-At 1	TEV-At 2	TEV-At 3	TEV-At 4	TEV-At 5		Mock Median	Mock Mean	Mock SD		TEV Median	TEV Mean	TEV SD		TEV-At Median	TEV-At Mean	TEV-At SD		Gene AGI	Annotation
A000002_01	2.49324	0.4534	0.181852	1.34934	5.37887		A000002_01	At1g26110	0	0.064	-0.076	0.66	-0.074	0.087	0.003	0.216	-0.06	-0.616	0.441	0.573	0.239	0.265	0.379		0	0.1148	0.310263		0.003	-0.074	0.320121		0.379	0.3794	0.136084		At1g26110	expressed protein
A000025_01	3.79704	0.322	0.0848029	1.25244	0.760034		A000025_01	At1g11650	0	-0.165	-0.713	0.107	0.131	0.07	0.032	0.115	-0.029	-0.019	0.522	0.401	0.229	0.266	0.361		0	-0.128	0.347233		0.032	0.0338	0.0604955		0.361	0.3558	0.116012		At1g11650	RNA-binding protein 45 (RBP45), putative similar to gb|U90212 DNA binding protein ACBF from Nicotiana tabacum and contains 3 PF|00076 RNA recognition motif domains.
A000061_01	2.82367	0.6462	0.228851	1.55254	2.75256		A000061_01	At1g76590	0	0.142	-0.355	0.283	-0.046	0.335	0.97	1.153	0.418	0.629	1.249	1.26	1.017	1.424	1.786		0	0.0048	0.238893		0.629	0.701	0.352099		1.26	1.3472	0.284922		At1g76590	zinc-binding family protein similar to zinc-binding protein [Pisum sativum] GI:16117799; contains Pfam profile PF04640 : Protein of unknown function, DUF597
A000153_01	3.5115	1.1776	0.335355	2.18411	1.24313		A000153_01	At1g09240	-0.099	0	-0.002	1.601	0.166	0.953	0.289	-0.367	0.576	1.105	2.053	1.294	2.095	1.584	1.418		0	0.3332	0.715096		0.576	0.5112	0.585789		1.584	1.6888	0.366682		At1g09240	nicotianamine synthase, putative similar to nicotianamine synthase [Lycopersicon esculentum][GI:4753801], nicotianamine synthase 2 [Hordeum vulgare][GI:4894912]
A000400_01	2.61396	0.37924	0.145082	1.28744	4.47718		A000400_01	At1g32400	0.075	0	-0.683	-0.026	0.162	0.11	0.164	0.044	0.13	-0.446	0.502		0.362	0.282	0.394		0	-0.0944	0.337075		0.11	0.0004	0.253351		0.378	0.385	0.091119		At1g32400	senescence-associated family protein contains Pfam profile PF00335: Tetraspanin family
A000602_01	2.64425	0.6016	0.227512	1.47068	4.47718		A000602_01	At1g29640		0.584	-0.351	0.292	-0.292	0.78	0.246	-0.146	0.238	-0.319	0.719	0.578	0.886	0.94	0.684		0	0.05825	0.45505		0.238	0.1598	0.424546		0.719	0.7614	0.149036		At1g29640	expressed protein contains Pfam profile PF04520: Protein of unknown function, DUF584
A000639_01	2.71485	0.5746	0.211651	1.45133	3.27795		A000639_01	At1g16320	-0.116	0.037	-0.732	0	0.304	-0.728	-0.521	-0.463	-0.73	-1.466	-0.194	-0.201	-0.265	-0.328	-0.047		0	-0.1014	0.384596		-0.728	-0.7816	0.401048		-0.201	-0.207	0.104654		At1g16320	expressed protein ESTs gb|T76348, gb|N65615 and gb|Z18119 come from this gene
A000735_01	3.09484	0.44375	0.143384	1.35849	1.7537		A000735_01	At1g21690		0.003	-0.348	0.003	-0.003	0.085	-0.262	-0.104	0.066		0.503	0.388	0.032	0.339	0.396		0	-0.08625	0.174523		-0.019	-0.05375	0.162773		0.388	0.3316	0.177849		At1g21690	replication factor C 37 kDa, putative Similar to SWISS-PROT:P35249 activator 1 37 kDa subunit (Replication factor C 37 kDa subunit, A1 37 kDa subunit, RF-C 37 kDa subunit, RFC37) [Homo sapiens]; contains Pfam domain, PF00004: ATPase, AAA family
A000741_01	3.04835	0.243	0.0797152	1.18139	2.16718		A000741_01	At1g66130	-0.046	0	-0.033	0.06	0.122	-0.534	-0.414	-0.285	-0.551	-0.475	-0.184	-0.237	-0.247	-0.247	-0.129		0	0.0206	0.0699414		-0.475	-0.4518	0.107688		-0.237	-0.2088	0.0517127		At1g66130	oxidoreductase N-terminal domain-containing protein similar to AX110P [Daucus carota] GI:285739; contains Pfam profile PF01408: Oxidoreductase family NAD-binding Rossmann fold
A000827_01	4.27035	1.292	0.302552	2.40808	0.527996		A000827_01	At1g80160	0.823	-0.039	-0.225	0.325	0	0.413	0.058	-0.399	-0.148	-0.887	1.426	0.925	0.895	0.684	1.567		0	0.1768	0.411949		-0.148	-0.1926	0.488961		0.925	1.0994	0.377515		At1g80160	lactoylglutathione lyase family protein / glyoxalase I family protein contains glyoxalase family protein domain, Pfam:PF00903
A001098_01	2.79412	0.3108	0.111234	1.24697	2.75256		A001098_01	At1g35780	0	-0.092	-0.956	0.285	0.124	-0.119	-0.168	-0.134	-0.007	-0.173	0.254	0.186	0.024	0.034	0.455		0	-0.1278	0.484081		-0.134	-0.1202	0.0672287		0.186	0.1906	0.177642		At1g35780	expressed protein
A001103_01	5.30639	0.785	0.147935	1.71262	0		A001103_01	At1g01060	0	-0.121	-0.001	0.278	0.117	-0.968	-1.148	-1.556	-1.009	-1.212	-0.148	-0.452	-0.5	-0.438	-0.43		0	0.0546	0.15059		-1.148	-1.1786	0.233238		-0.438	-0.3936	0.139953		At1g01060	myb family transcription factor contains Pfam profile: PF00249 myb-like DNA-binding domain; identical to cDNA LATE ELONGATED HYPOCOTYL MYB transcription factor GI:3281845
A001154_01	3.27566	0.449	0.137072	1.36775	1.47491		A001154_01	At1g21780	-0.224	0	-0.437	0.049	0.42	-0.234	-0.102	-0.117	-0.234	-0.506	0.186	0.276	-0.024	0.131	0.483		0	-0.0384	0.321159		-0.234	-0.2386	0.162012		0.186	0.2104	0.187388		At1g21780	BTB/POZ domain-containing protein Contains similarity to gb|AJ000644 SPOP (speckle-type POZ protein) from Homo sapiens and contains a PF|00651 BTB/POZ domain. ESTs gb|T75841, gb|R89974, gb|R30221, gb|N96386, gb|T76457, gb|AI100013 and gb|T76456 come from
A001155_01	4.23556	0.4626	0.109218	1.37931	0.527996		A001155_01	At1g69490	0	0.102	0.086	-0.002	-0.036	-0.684	-0.625	-0.736	-0.738	-0.95	-0.385	-0.089	-0.324	-0.197	-0.425		0	0.03	0.0604152		-0.736	-0.7466	0.122743		-0.324	-0.284	0.138993		At1g69490	no apical meristem (NAM) family protein similar to N-term half of NAC domain protein NAM [Arabidopsis thaliana] GI:4325282
A001204_01	3.05709	0.388	0.126918	1.30758	2.16718		A001204_01	At1g33350	0	0.337	0.447	-0.144	-0.031	0.634	0.452	0.194	0.387	0.307	0.827	0.618	0.635	0.976	0.858		0	0.1218	0.255391		0.387	0.3948	0.164756		0.827	0.7828	0.153247		At1g33350	pentatricopeptide (PPR) repeat-containing protein contains multiple Pfam domains: PF01535: PPR repeat
A001212_01	2.52299	0.7472	0.296157	1.60486	4.47718		A001212_01	At1g56220	-0.236	0.111	-0.732	0	0.085	-0.066	0.112	0.207	-0.215	-1.201	0.575	0.634	0.139	0.596	0.629		0	-0.1544	0.350667		-0.066	-0.2326	0.565213		0.596	0.5146	0.211361		At1g56220	dormancy/auxin associated family protein similar to Auxin-repressed 12.5 kDa protein (Swiss-Prot:Q05349) [Fragaria ananassa]; similar to auxin-repressed protein (GI:927034) [Fragaria x ananassa]; similar to dormancy-associated protein (GI:2605887) [Pisum
A001224_01	2.99113	0.42984	0.143705	1.34746	2.16718		A001224_01	At1g78270		0.037	-1.04	0.24	-0.037	-0.179	-0.151	0.27	-0.086		0.511	0.565	0.27	0.13	0.525		0	-0.2	0.572112		-0.118	-0.0365	0.208014		0.511	0.4002	0.190375		At1g78270	UDP-glucose glucosyltransferase, putative similar to UDP-glucose glucosyltransferase GI:3928543 from [Arabidopsis thaliana]
A001247_01	2.49423	0.3684	0.147701	1.29148	5.37887		A001247_01	At1g50420		-0.039	0.131	0.039	-0.223	0.064	-0.012	-0.305	-0.134	-0.391	0.209	0.545	0.134	0.084	0.092		0	-0.023	0.150351		-0.134	-0.1556	0.191732		0.134	0.2128	0.1922		At1g50420	scarecrow-like transcription factor 3 (SCL3) identical to GB:AAD24404 GI:4580515 from [Arabidopsis thaliana] (Plant J. 18 (1), 111-119 (1999))
A001308_01	2.87208	0.331	0.115247	1.25729	2.75256		A001308_01	At1g01725	-0.224	0.057	0.552	0	-0.185	0.283	0.392	0.337	0.067	0.446	0.601	0.731	0.818	0.513	0.517		0	0.04	0.309981		0.337	0.305	0.146289		0.601	0.636	0.134781		At1g01725	expressed protein
A001313_01	3.26048	0.815	0.249963	1.73232	1.47491		A001313_01	At1g80130	-0.015	0.135	-0.543	0.58	0	-0.127	-0.391	-0.26	-0.714	-1.149	0.56	0.461	-0.186	0.307	0.292		0	0.0314	0.401488		-0.391	-0.5282	0.409765		0.307	0.2868	0.286775		At1g80130	expressed protein
A001426_01	2.64711	0.4674	0.17657	1.36182	4.47718		A001426_01	At1g17210	0.022	0	-0.074	0.477	-0.126	-0.024	-0.182	0.153	-0.26	-0.682	0.337	0.452	0.192	0.189	0.172		0	0.0598	0.240564		-0.182	-0.199	0.312981		0.192	0.2684	0.12232		At1g17210	expressed protein distantly related to dentin phosphoryn [Homo sapiens] (GI:4322670)
A001495_01	6.5904	0.9322	0.141448	1.88957	0		A001495_01	At1g52890	0.332	0.187	-1.019	0	-0.609	-0.202	-0.658	-0.295	0.015	-0.231	0.59	0.643	0.763	0.574	0.72		0	-0.2218	0.571939		-0.231	-0.2742	0.244157		0.643	0.658	0.0818138		At1g52890	no apical meristem (NAM) family protein contains Pfam PF02365: No apical meristem (NAM) domain; similar to NAM (no apical meristem) GB:CAA63101 from [Petunia x hybrida]
A001513_01	2.99359	0.3248	0.108499	1.25044	2.16718		A001513_01	At1g09620	-0.147	0.01	0.178	0	-0.413	0.248	0.237	0.132	0.092	-0.113	0.4	0.275	0.519	0.559	0.467		0	-0.0744	0.22152		0.132	0.1192	0.14602		0.467	0.444	0.111665		At1g09620	tRNA synthetase class I (I, L, M and V) family protein similar to cytosolic leucyl-tRNA synthetase [Candida albicans] GI:9858190; contains Pfam profile PF00133: tRNA synthetases class I (I, L, M and V)
A001521_01	3.5313	0.3406	0.0964516	1.26359	1.02009		A001521_01	At1g73380	0	0.104	-0.188	0.023	-0.013	0.528	0.508	0.435	0.398	0.191	0.753	0.853	0.76	0.77	0.627		0	-0.0148	0.106961		0.435	0.412	0.134386		0.76	0.7526	0.0809525		At1g73380	expressed protein
A001568_01	2.77225	0.2574	0.0928489	1.19468	3.27795		A001568_01	At1g09100	-0.046	0.117	-0.172	0.193	0	0.337	0.378	0.509	0.6	0.547	0.768	0.669	0.665	0.668	0.888		0	0.0184	0.142254		0.509	0.4742	0.112266		0.669	0.7316	0.0977052		At1g09100	26S protease regulatory subunit 6A, putative identical to SP:O04019 from [Arabidopsis thaliana]
A001695_01	2.73672	0.511	0.18672	1.39713	3.27795		A001695_01	At1g77480	0.105	0.21	-0.41	0	-0.003	0.089	0.294	0.367	-0.036	-0.505	0.555	0.517	0.61	0.67	0.412		0	-0.0196	0.23522		0.089	0.0418	0.345192		0.555	0.5528	0.0976202		At1g77480	nucellin protein, putative similar to nucellin GB:AAB96882 GI:2290202 [Hordeum vulgare] (nucellin: similar to aspartic protease and its specific expression in nucellar cells during degeneration)
A001760_01	2.58249	0.6904	0.267339	1.54049	4.47718		A001760_01	At1g52930	0.04	0	0.091	-0.602	-0.604	0.772	0.689	0.055	0.194	-0.515	1.041	1.055	0.768	0.808	0.975		0	-0.215	0.35566		0.194	0.239	0.522251		0.975	0.9294	0.13332		At1g52930	brix domain-containing protein contains Pfam domain, PF04427: Brix domain
A001791_01	2.64329	0.6036	0.228352	1.47242	4.47718		A001791_01	At1g69800	0	0.118	-0.749	0.18	-0.03	-0.259	-0.263	-0.334	-0.948	-1.178	0.106	0.123	-0.136	0.057	-0.114		0	-0.0962	0.374818		-0.334	-0.5964	0.434663		0.057	0.0072	0.123336		At1g69800	CBS domain-containing protein low similarity to SP|Q9UGI9 5'-AMP-activated protein kinase, gamma-3 subunit (AMPK gamma-3 chain) (AMPK gamma3) {Homo sapiens}; contains Pfam profile PF00571: CBS domain
A001870_01	2.53123	0.3262	0.12887	1.24691	4.47718		A001870_01	At1g73180	0	0.061	-0.002	0.198	-0.018	0.267	0.36	0.125	0.224	-0.169	0.466	0.623	0.362	0.567	0.42		0	0.0478	0.0892031		0.224	0.1614	0.203102		0.466	0.4876	0.106594		At1g73180	eukaryotic translation initiation factor-related similar to eukaryotic translation initiation factor 2A (GI:21956484) [Homo sapiens]; similar to Eukaryotic translation initiation factor 3 subunit 9 (eIF-3 eta) (eIF3 p116) (eIF3 p110) (eIF3b) (Swiss-Prot:P
A001874_01	2.94801	0.8778	0.29776	1.75175	2.16718		A001874_01	At1g72680	0.15	0.178	-0.797	-0.279	0	0.357	0.023	0.217	0.378	-1.007	0.999	0.992	0.574	0.792	1		0	-0.1496	0.404763		0.217	-0.0064	0.577017		0.992	0.8714	0.188491		At1g72680	cinnamyl-alcohol dehydrogenase, putative similar to cinnamyl-alcohol dehydrogenase GB:AAC35846 [Medicago sativa], SP|Q08350 [Picea abies]
A001970_01	2.82517	0.8454	0.299239	1.70311	2.75256		A001970_01	At1g06570	-0.159	0.001	-1.247	0	0.097	-0.684	-0.414	-0.329	-0.657	-1.803	0.283	-0.004	-0.072	0.14	-0.007		0	-0.2616	0.558464		-0.657	-0.7774	0.593337		-0.004	0.068	0.143019		At1g06570	4-hydroxyphenylpyruvate dioxygenase (HPD) identical to 4-hydroxyphenylpyruvate dioxygenase (HPD) SP:P93836 [Arabidopsis thaliana (Mouse-ear cress)]
A001975_01	2.53501	0.312	0.123077	1.23435	4.47718		A001975_01	At1g64550	0	-0.011	0.278	0.335	-0.048	0.2	0.116	-0.166	0.009	-0.274	0.315	0.293	0.132	0.338	0.367		0	0.1108	0.180659		0.009	-0.023	0.195911		0.315	0.289	0.0919592		At1g64550	ABC transporter family protein similar to ABC transporter protein GB:AAF31030 GI:6899653 from [Leishmania major]
A002008_01	3.15405	0.5914	0.187505	1.49369	1.7537		A002008_01	At1g47960	-0.111	0.017	-0.155	0.078	0	-0.135	-0.062	-0.152	-0.458	0.359	0.611	0.204	0.634	0.362	0.698		0	-0.0342	0.0960089		-0.135	-0.0896	0.29312		0.611	0.5018	0.209836		At1g47960	invertase/pectin methylesterase inhibitor family protein low similarity to SP|P83326 Pectinesterase inhibitor (Pectin methylesterase inhibitor) (PMEI) {Actinidia chinensis}; contains Pfam profile PF04043: Plant invertase/pectin methylesterase inhibitor
A002044_01	2.76315	0.28584	0.103447	1.21526	3.27795		A002044_01	At1g27630	0.213	0.215	-0.213		-0.314	0.371	0.451	0.328	0.334		0.67	0.684	0.546	0.516	0.543		0	-0.02475	0.278752		0.353	0.371	0.0566216		0.546	0.5918	0.0788048		At1g27630	cyclin family protein similar to cyclin T1 [Homo sapiens] GI:2981196; contains Pfam profile PF00134: Cyclin, N-terminal domain
A002089_01	3.66598	0.355	0.0968363	1.27705	0.760034		A002089_01	At1g80930	0.007	0	-0.143	0.174	-0.392	-0.039	0.041	0.094	0.03	-0.237	0.274	0.336	0.337	0.477	0.24		0	-0.0708	0.211763		0.03	-0.0222	0.129076		0.336	0.3328	0.0906791		At1g80930	MIF4G domain-containing protein / MA3 domain-containing protein similar to SP|Q9P6R9 Cell cycle control protein cwf22 {Schizosaccharomyces pombe}; contains Pfam profiles PF02854: MIF4G domain, PF02847: MA3 domain
A002108_01	2.71701	0.595	0.21899	1.47733	3.27795		A002108_01	At1g10170		0.211	-0.211	0.521	-0.595	0.091	-0.087	0.598	0.698	-0.119	0.982	0.571	0.925	0.993	0.685		0	-0.0185	0.487558		0.091	0.2362	0.385962		0.925	0.8312	0.19157		At1g10170	NF-X1 type zinc finger family protein contains Pfam PF01422: NF-X1 type zinc finger; similar to transcriptional repressor NF-X1 (SP:Q12986) [Homo sapiens]; similar to EST gb|T21002
A002135_01	3.10776	0.2522	0.0811518	1.18897	1.7537		A002135_01	At1g65280	-0.25	0	0.331	0.235	-0.422	0	-0.186	0.075	0.084	0.037	0.244	0.172	0.254	0.315	0.286		0	-0.0212	0.31746		0.037	0.002	0.110257		0.254	0.2542	0.0537792		At1g65280	DNAJ heat shock N-terminal domain-containing protein contains Pfam profile PF00226 DnaJ domain
A002178_01	3.12142	0.3066	0.0982247	1.23516	1.7537		A002178_01	At1g16040	0.023	0.133	-0.316	-0.117	0	0.192	0.189	0.316	0.199	-0.037	0.319	0.491	0.547	0.471	0.564		0	-0.0554	0.1706		0.192	0.1718	0.128291		0.491	0.4784	0.0970247		At1g16040	expressed protein similar To Phosphatidylinositol-glycan biosynthesis, class F protein (PIG-F). (Mouse) (SP:O09101) [Mus musculus]; contains six transmembrane domains;
A002638_01	2.58999	0.5544	0.214055	1.43384	4.47718		A002638_01	At1g78930	-0.085	0.07	0.765	0	-0.526	-0.149	-0.102	-0.317	-0.631	0.425	0.414	0.326	0.534	0.57	0.154		0	0.0448	0.464756		-0.149	-0.1548	0.384729		0.414	0.3996	0.168109		At1g78930	mitochondrial transcription termination factor-related / mTERF-related contains Pfam profile PF02536: mTERF
A002733_01	2.5591	0.3048	0.119104	1.23967	4.47718		A002733_01	At1g15400	-0.117	0	-0.565	0.13	0.262	-0.073	-0.12	-0.235	-0.281	-0.334	0.201	0.212	-0.121	-0.068	0.257		0	-0.058	0.316875		-0.235	-0.2086	0.109432		0.201	0.0962	0.176343		At1g15400	expressed protein ESTs gb|H37295 and gb|R64895 come from this gene
A002788_01	3.08257	0.2316	0.0751321	1.17375	1.7537		A002788_01	At1g17550	-0.006	0	0.426	0.152	-0.083	-0.262	-0.295	-0.479	-0.332	-0.331	-0.004	-0.145	-0.194	-0.085	-0.113		0	0.0978	0.202287		-0.331	-0.3398	0.0830283		-0.113	-0.1082	0.0709486		At1g17550	protein phosphatase 2C-related / PP2C-related similar to protein phosphatase 2C GI:3242077 from (Arabidopsis thaliana)
A002818_01	2.89518	0.403	0.139197	1.31415	2.75256		A002818_01	At1g21920	-0.719	0.125	-0.399	0.156	0	-0.749	-0.49	-0.318	-0.667	-0.871	-0.233	-0.066	-0.229	-0.144	-0.408		0	-0.1674	0.379476		-0.667	-0.619	0.217916		-0.229	-0.216	0.127481		At1g21920	MORN (Membrane Occupation and Recognition Nexus) repeat-containing protein /phosphatidylinositol-4-phosphate 5-kinase-related similar to phosphatidylinositol-4-phosphate 5-kinase AtPIP5K1 [Arabidopsis thaliana] GI:3702691; contains Pfam profile PF02493: M
A002839_01	5.06243	0.8334	0.164624	1.78781	0		A002839_01	At1g36060	0	-0.543	-1.306	0.04	0.854	-0.276	-0.346	0.123	-0.298	-0.347	0.575	0.413	0.453	0.574	1.008		0	-0.191	0.798279		-0.298	-0.2288	0.199052		0.574	0.6046	0.236768		At1g36060	AP2 domain-containing transcription factor, putative similar to AP2 domain transcription factor GI:4567204 from [Arabidopsis thaliana]
A002934_01	2.56861	0.2324	0.0904768	1.17201	4.47718		A002934_01	At1g80000	0	-0.167	0.004	0.158	-0.268	-0.063	-0.169	0.126	0.113	0.083	0.336	0.218	0.229	0.177	0.292		0	-0.0546	0.165671		0.083	0.018	0.128884		0.229	0.2504	0.063153		At1g80000	expressed protein identical to unknown protein GB:AAD55481 [Arabidopsis thaliana]
A003054_01	3.78161	0.273	0.0721914	1.20905	0.760034		A003054_01	At1g16810	0.057	0	0.108	-0.26	-0.061	0.187	0.155	0.271	0.158	0.278	0.517	0.555	0.424	0.368	0.55		0	-0.0312	0.142624		0.187	0.2098	0.060421		0.517	0.4828	0.0829681		At1g16810	expressed protein
A003115_01	2.96419	0.52264	0.176318	1.42277	2.16718		A003115_01	At1g27480	0.169	0.196	-1.196	-0.043	0	-0.532	-0.25	-0.267	-0.702		-0.057	-0.08	-0.098	-0.119	0.293		0	-0.1748	0.580187		-0.399	-0.43775	0.218416		-0.08	-0.0122	0.172133		At1g27480	lecithin:cholesterol acyltransferase family protein / LACT family protein similar to LCAT-like lysophospholipase (LLPL) [Homo sapiens] GI:4589720; contains Pfam profile PF02450: Lecithin:cholesterol acyltransferase (phosphatidylcholine-sterol acyltransfer
A003201_01	4.44134	0.4694	0.105689	1.38934	0.21257		A003201_01	At1g01640	-0.177	0.194	0.177		-0.564	0.61	0.713	0.491	0.558	0.637	1.054	0.882	1.084	1.021	1.315		0	-0.0925	0.357848		0.61	0.6018	0.0834668		1.054	1.0712	0.156696		At1g01640	speckle-type POZ protein-related contains Pfam profile:PF00651 BTB/POZ domain; similar to Speckle-type POZ protein (SP:O43791) [Homo sapiens]
A003384_01	3.14661	0.4048	0.128646	1.31942	1.7537		A003384_01	At1g71140	-0.073	0	-0.138	0.191	0.048	-0.486	-0.066	-0.161	-0.011	-0.079	0.328	0.422	0.21	0.131	0.13		0	0.0056	0.1255		-0.079	-0.1606	0.189653		0.21	0.2442	0.128122		At1g71140	MATE efflux family protein similar to ripening regulated protein DDTFR18 [Lycopersicon esculentum] GI:12231296; contains Pfam profile PF01554: Uncharacterized membrane protein family
A003434_01	4.40441	0.3796	0.0861864	1.30161	0.21257		A003434_01	At1g15350	0	-0.1	-0.114	0.038	0.112	-0.396	-0.306	-0.232	-0.416	-0.231	0.147	-0.078	0.043	0.03	0.175		0	-0.0128	0.0950852		-0.306	-0.3162	0.0877223		0.043	0.0634	0.101204		At1g15350	expressed protein
A003567_01	3.3667	0.8382	0.248968	1.75853	1.47491		A003567_01	At1g64660	-0.197	0	-0.36	0.187	0.084	-0.197	0.139	0.625	-0.243	-0.374	1.176	0.714	0.46	0.714	1.077		0	-0.0572	0.22027		-0.197	-0.01	0.402237		0.714	0.8282	0.293479		At1g64660	Cys/Met metabolism pyridoxal-phosphate-dependent enzyme family protein similar to SP|P13254 Methionine gamma-lyase (EC 4.4.1.11) (L-methioninase) {Pseudomonas putida}; contains Pfam profile PF01053: Cys/Met metabolism PLP-dependent enzyme
A003671_01	2.44788	0.29	0.11847	1.21392	5.37887		A003671_01	At1g13450	-0.233	0	-0.138	0.007	0.041	-0.186	-0.086	0.107	-0.128	-0.448	0.073	0.157	0.143	0.13	0.206		0	-0.0646	0.116401		-0.128	-0.1482	0.200445		0.143	0.1418	0.0480281		At1g13450	DNA binding protein GT-1 identical to DNA binding protein GT-1 GI:598073 from [Arabidopsis thaliana]
A003892_01	3.44423	0.6118	0.17763	1.50661	1.24313		A003892_01	At1g09530	0.207	-0.061	-0.948	0.146	0	-0.751	-0.699	-0.527	-0.964	-1.336	-0.186	-0.307	-0.279	-0.046	-0.4		0	-0.1312	0.469181		-0.751	-0.8554	0.310635		-0.279	-0.2436	0.134255		At1g09530	phytochrome interacting factor 3 (PIF3) identical to phytochrome interacting factor 3 (PIF3) GI:3929585 from [Arabidopsis thaliana]
A003898_01	2.75301	0.3156	0.114638	1.24945	3.27795		A003898_01	At1g23780	0.015	-0.015	-0.143	0.183	0	0.026	0.082	0.205	0.077	0.252	0.515	0.646	0.277	0.249	0.533		0	0.008	0.116263		0.082	0.1284	0.0954269		0.515	0.444	0.172974		At1g23780	F-box family protein contains Pfam PF00646: F-box domain; similar to SP:Q9Y3I1 F-box only protein 7 {Homo sapiens}; similar to SKP1 interacting partner 2 (SKIP2) TIGR_Ath1:At5g67250
A003991_01	2.63304	0.3748	0.142345	1.29475	4.47718		A003991_01	At1g74850	0	-0.075	0.516	0.066	-0.372	-0.156	-0.222	-0.348	-0.644	-0.468	-0.091	0.273	-0.081	-0.145	0.08		0	0.027	0.320537		-0.348	-0.3676	0.195471		-0.081	0.0072	0.170687		At1g74850	pentatricopeptide (PPR) repeat-containing protein contains Pfam profile PF01535: PPR repeat
A004044_01	2.55954	0.5434	0.212304	1.42325	4.47718		A004044_01	At1g45230	0	0.078	0.449	-0.244	-0.216	-0.486	-0.187	-0.36	-0.85	-1.148	-0.19	-0.026	0.101	0.044	-0.243		0	0.0134	0.279723		-0.486	-0.6062	0.388515		-0.026	-0.0628	0.148528		At1g45230	defective chloroplasts and leaves protein-related / DCL protein-related similar to defective chloroplasts and leaves (DCL) protein SP:Q42463 from [Lycopersicon esculentum]
A004214_01	2.53557	0.71	0.280016	1.58397	4.47718		A004214_01	At1g29400	0	0.047	-0.28	0.374	-0.211	-0.037	-0.042	-0.192	-0.471	-1.256	0.303	0.674	-0.015	0.358	0.232		0	-0.014	0.256917		-0.192	-0.3996	0.51014		0.303	0.3104	0.248273		At1g29400	RNA recognition motif (RRM)-containing protein similar to GI:6650523 from [Arabidopsis thaliana]
A004263_01	3.7689	0.3574	0.0948287	1.28273	0.760034		A004263_01	At1g73820	-0.115	0	-0.098	0.199	0.301	0	0.026	0.165	-0.011	-0.082	0.497	0.376	0.422	0.17	0.42		0	0.0574	0.184768		0	0.0196	0.0905886		0.42	0.377	0.123616		At1g73820	Ssu72-like family protein contains Pfam profile PF04722: Ssu72-like protein; similar to SSU72 protein (Swiss-Prot:P53538) [Saccharomyces cerevisiae]
A004317_01	2.79757	0.3666	0.131042	1.2805	2.75256		A004317_01	At1g70690	0.055	0	-0.744	0.565	-0.428	0.455	0.697	0.416	0.943	0.614	1.027	1.123	1.014	0.855	0.939		0	-0.1104	0.499507		0.614	0.625	0.211548		1.014	0.9916	0.100557		At1g70690	kinase-related contains Pfam PF01657:Domain of unknown function; similar to receptor-like protein kinase 4 GI:13506745 [Arabidopsis thaliana]
A004431_01	2.57322	0.6596	0.256332	1.62814	4.47718		A004431_01	At1g08630	-0.544	0.109	0.171	-0.561	0	-0.004	0.282	0.013	0.002	-0.385	1.309	0.764	0.062	0.454	0.617		0	-0.165	0.359045		0.002	-0.0184	0.237826		0.617	0.6412	0.456108		At1g08630	L-allo-threonine aldolase-related similar to L-allo-threonine aldolase (EC 4.1.2.-) (L-allo-TA) (L-allo-threonine acetaldehyde-lyase) (SP:O07051) {Aeromonas jandaei}; similar to ESTs gb|R30517, gb|T42772, gb|R90493, and gb|R90493
A004469_01	2.62746	0.5242	0.199508	1.40483	4.47718		A004469_01	At1g08230	-0.101	0	0.147	0.452	-0.007	-0.077	0.069	-0.2	-0.848	0.052	0.459	0.303	0.256	0.251	0.348		0	0.0982	0.216764		-0.077	-0.2008	0.377788		0.303	0.3234	0.0854301		At1g08230	amino acid transporter family protein low similarity to amino acid permease [Oryza sativa] GI:7415521; contains Pfam profile PF01490: Transmembrane amino acid transporter protein
A004596_01	2.72015	0.2248	0.0826424	1.16952	3.27795		A004596_01	At1g68070	-0.064	-0.037	0.309	0	0.065	0.155	0.184	0.027	0.008	0.109	0.245	0.464	0.214	0.319	0.365		0	0.0546	0.150221		0.109	0.0966	0.0772936		0.319	0.3214	0.0995153		At1g68070	zinc finger (C3HC4-type RING finger) family protein very low similarity to RING-H2 finger protein RHG1a [Arabidopsis thaliana] GI:3822225; contains Pfam profile: PF00097 zinc finger, C3HC4 type (RING finger)
A004597_01	2.92521	0.5626	0.192328	1.45968	2.16718		A004597_01	At1g23390	-0.104	0.104	-0.731		0.175	-0.703	-0.358	-0.044	-0.435	-0.854	-0.138	-0.072	0.074	0.222	0.333		0	-0.139	0.412041		-0.435	-0.4788	0.314882		0.074	0.0838	0.196701		At1g23390	kelch repeat-containing F-box family protein similar to hypothetical protein GB:AAF27090 GI:6730669 from (Arabidopsis thaliana); contains Pfam profiles PF01344: Kelch motif, PF00646: F-box domain
A004598_01	3.94816	0.2516	0.063726	1.19148	0.534461		A004598_01	At1g28200	0	-0.024	0.341	0.015	-0.01	0.132	0.11	0.049	0.106	0.051	0.347	0.425	0.3	0.238	0.396		0	0.0644	0.155278		0.106	0.0896	0.0374873		0.347	0.3412	0.0748445		At1g28200	GRAM domain-containing protein / ABA-responsive protein-related similar to ABA-responsive protein [Hordeum vulgare] GI:4103635; contains Pfam profile PF02893: GRAM domain
A004629_01	2.93668	0.5302	0.180544	1.4172	2.16718		A004629_01	At1g24370	-0.042	0.004	0.047	0	-0.139	0.479	0.307	-0.045	0.054	-0.379	0.603	0.725	0.591	0.469	0.679		0	-0.026	0.0705868		0.054	0.0832	0.33078		0.603	0.6134	0.0977487		At1g24370	hypothetical protein contains Pfam profiles PF04776: Protein of unknown function (DUF626), PF04827: Protein of unknown function (DUF635)
A004707_01	3.47445	0.6448	0.185583	1.54377	1.24313		A004707_01	At1g19610	0.043	0.116	0	-0.161	-0.166	0.928	0.753	0.977	1.201	1.553	1.644	1.686	1.945	1.496	1.865		0	-0.0336	0.125636		0.977	1.0824	0.307808		1.686	1.7272	0.179234		At1g19610	plant defensin-fusion protein, putative (PDF1.4) plant defensin protein family member, personal communication, Bart Thomma (Bart.Thomma@agr.kuleuven.ac.be); similar to SWISS-PROT:P30224, Cysteine-rich antifungal protein 1 precursor (AFP1)[Arabidopsis thal
A004915_01	2.76235	0.3846	0.139229	1.30702	3.27795		A004915_01	At1g60140	-0.014	0.048	-0.047	0.174	0	0.521	0.682	0.632	0.619	0.251	0.818	0.727	1.181	1.048	0.854		0	0.0322	0.0863145		0.619	0.541	0.172298		0.854	0.9256	0.184633		At1g60140	glycosyl transferase family 20 protein / trehalose-phosphatase family protein contains Pfam profile: PF02358 trehalose-phosphatase
A004931_01	3.3289	0.5218	0.156748	1.4234	1.47491		A004931_01	At1g21000	-0.208	0	-0.182	0.167	0.031	-0.512	-0.393	-0.166	-0.532	-0.871	0.043	-0.016	-0.181	0.091	0.198		0	-0.0384	0.156417		-0.512	-0.4948	0.255773		0.043	0.027	0.140273		At1g21000	zinc-binding family protein similar to zinc-binding protein [Pisum sativum] GI:16117799; contains Pfam profile PF04640 : Protein of unknown function, DUF597
A005086_01	2.87866	0.6624	0.230107	1.53223	2.75256		A005086_01	At1g22930	0	0.245	-0.147	0.41	-0.192	0.014	0.241	0.203	0.232	-0.807	0.663	0.69	0.585	0.735	0.522		0	0.0632	0.25818		0.203	-0.0234	0.447722		0.663	0.639	0.085144		At1g22930	T-complex protein 11 contains Pfam PF05794: T-complex protein 11
A005192_01	3.55534	0.307	0.086349	1.23546	1.02009		A005192_01	At1g09290	-0.025	0.53	0.001	-0.019	0	0.499	0.516	0.379	0.246	0.345	0.818	0.701	0.626	0.72	0.655		0	0.0974	0.242102		0.379	0.397	0.112243		0.701	0.704	0.0737326		At1g09290	expressed protein This gene is continued on the 5' end of BAC T12M14
A005214_01	6.07078	0.6328	0.104237	1.55411	0		A005214_01	At1g04310	-0.366	0	0.553	-0.179	0.304	-0.858	-0.934	-0.729	-0.879	-0.719	-0.081	-0.375	-0.324	-0.095	-0.08		0	0.0624	0.369037		-0.858	-0.8238	0.0953032		-0.095	-0.191	0.14593		At1g04310	ethylene receptor-related similar to ethylene receptor CS-ETR2 [Cucumis sativus] GI:6136818; contains Pfam profiles PF01590: GAF domain, PF00512: His Kinase A (phosphoacceptor) domain
A005226_01	6.06209	0.5478	0.0903649	1.46192	0		A005226_01	At1g45249	-0.166	0	-0.446	0.21	0.229	-1.104	-1.289	-1.137	-1.339	-1.259	-0.744	-0.709	-0.79	-0.545	-0.601		0	-0.0346	0.281526		-1.259	-1.2256	0.100786		-0.709	-0.6778	0.101832		At1g45249	ABA-responsive element-binding protein 1 (AREB1) identical to ABA-responsive element binding protein 1 (AREB1) [Arabidopsis thaliana] GI:9967417
A005439_01	2.91444	0.3538	0.121395	1.27345	2.16718		A005439_01	At3g51870	-0.15	0.03	0	-0.108	0.104	0.076	0.156	0.032	0.169	-0.274	0.52	0.322	0.477	0.243	0.366		0	-0.0248	0.103447		0.076	0.0318	0.180081		0.366	0.3856	0.113116		At3g51870	mitochondrial substrate carrier family protein peroxisomal Ca-dependent solute carrier - Oryctolagus cuniculus, EMBL:AF004161
A005634_01	3.25552	0.5826	0.178957	1.47838	1.47491		A005634_01	At5g21160	0	-0.038	0.747	0.194	-0.161	0.101	0.098	0.084	0.163	-0.578	0.464	0.348	0.646	0.658	0.665		0	0.1484	0.358084		0.098	-0.0264	0.30985		0.646	0.5562	0.143277		At5g21160	La domain-containing protein / proline-rich family protein contains proline-rich extensin domains, INTERPRO:IPR002965, PF05383: La domain
A005687_01	2.56179	0.4228	0.165041	1.32171	4.47718		A005687_01	At5g58570	-0.512	0	0.215	-0.139	0.024	0.279	0.581	0.441	0.683	1.046	1.1	0.978	1.14	0.858	1.068		0	-0.0824	0.271255		0.581	0.606	0.289097		1.068	1.0288	0.112611		At5g58570	expressed protein
A005885_01	2.63468	0.1954	0.0741645	1.14462	4.47718		A005885_01	At1g49590	0	0.084	-0.182	0.025	-0.078	-0.02	-0.117	0.095	0.032	-0.059	0.091	0.259	0.189	0.234	0.135		0	-0.0302	0.10287		-0.02	-0.0138	0.0816499		0.189	0.1816	0.0692301		At1g49590	formin-binding protein-related similar to formin binding protein 21 (GI:3550080) [Homo sapiens]; similar to formin binding protein 21 (GI:3550077) [Mus musculus]; similar to Dinap1-interacting protein 1 (GI:8745458) [Crypthecodinium cohnii]
A005955_01	3.60909	0.2376	0.0658338	1.17775	1.02009		A005955_01	At3g16190	-0.001	0.122	0	-0.124	0.095	0.049	0.248	0.201	0.215	0.247	0.424	0.444	0.425	0.384	0.471		0	0.0184	0.0969448		0.215	0.192	0.0824924		0.425	0.4296	0.0318324		At3g16190	isochorismatase hydrolase family protein low similarity to SP|P32400 N-carbamoylsarcosine amidase (EC 3.5.1.59) (N-carbamoylsarcosine amidohydrolase) {Arthrobacter sp}; contains Pfam profile PF00857: isochorismatase family protein
A006030_01	3.13131	0.3988	0.127359	1.30956	1.7537		A006030_01	At2g40880	0	0.042	0.077	-0.343	-0.074	-0.008	0.115	0.414	0.378	-0.015	0.653	0.662	0.485	0.604	0.474		0	-0.0596	0.16812		0.115	0.1768	0.207064		0.604	0.5756	0.0905445		At2g40880	cysteine protease inhibitor, putative / cystatin, putative (FL3-27) similar to PRLI-interacting factor M [Arabidopsis thaliana] GI:11139270, cysteine proteinase inhibitor [Brassica rapa] GI:762785; contains Pfam profile PF00031: Cystatin domain
A006150_01	3.04259	0.8974	0.294947	1.85243	2.16718		A006150_01	At2g43570	0.701	0	0.043	-0.483	-0.085	1.203	0.718	0.652	1.695	0.875	1.28	2.32	1.814	1.941	2.275		0	0.0352	0.426488		0.875	1.0286	0.429068		1.941	1.926	0.420453		At2g43570	chitinase, putative similar to chitinase class IV GI:722272 from [Brassica napus]
A006161_01	5.05419	0.813	0.160857	1.76127	0		A006161_01	At2g43820	-0.139	0	-0.752	0.073	0.194	-0.73	-0.609	-0.645	-0.728	-1.112	-0.101	0.15	-0.178	-0.014	0.384		0	-0.1248	0.370781		-0.728	-0.7648	0.201084		-0.014	0.0482	0.223842		At2g43820	UDP-glucoronosyl/UDP-glucosyl transferase family protein contains Pfam profile: PF00201 UDP-glucoronosyl and UDP-glucosyl transferase
A006379_01	2.7637	0.37708	0.13644	1.29517	3.27795		A006379_01	At2g02740	0.465	0.224	0	-0.137	-0.24	0.246	0.148	-0.241	0.153		0.401	0.355	0.4	0.3	0.685		0	0.0624	0.284298		0.15	0.0765	0.216411		0.4	0.4282	0.149394		At2g02740	transcription factor, putative similar to DNA-binding protein p24 [Solanum tuberosum] GI:9651810, Plant Transcriptional Regulator Pbf-2 [Solanum tuberosum] (GI:21730639, GI:21730638, GI:21730640, GI:21730637)
A006422_01	2.5016	0.6694	0.267589	1.53609	5.37887		A006422_01	At2g18950	0	0.127	-0.937	0.13	-0.12	0.097	0.167	0.122	0.309	-0.938	0.682	0.892	0.583	0.589	0.358		0	-0.16	0.446486		0.122	-0.0486	0.503909		0.589	0.6208	0.192872		At2g18950	homogentisate phytylprenyltransferase family protein (HPT1) / tocopherol phytyltransferase family protein (TPT1) identical to gi:17104828; contains Pfam profile PF01040: UbiA prenyltransferase family; identical to cDNA tocopherol polyprenyltransferase (TP
A006497_01	5.44687	1.136	0.20856	2.17473	0		A006497_01	At2g41190	0.838	0.123	-0.399	0	-0.2	-1.32	-1.342	-1.21	-1.374	-2.059	-0.075	-0.379	-0.64	-0.142	-0.389		0	0.0724	0.471796		-1.342	-1.461	0.339932		-0.379	-0.325	0.224848		At2g41190	amino acid transporter family protein low similarity to vesicular GABA transporter [Rattus norvegicus] GI:2587061; belongs to INTERPRO:IPR002422 amino acid/polyamine transporter, family II
A006539_01	2.46491	0.3422	0.138829	1.25575	5.37887		A006539_01	At2g34260	0.168	0	0.803	-0.056	-0.552	0.581	0.324	-0.05	0.247	0.455	0.71	0.566	0.622	0.76	0.61		0	0.0726	0.488497		0.324	0.3114	0.238863		0.622	0.6536	0.0791758		At2g34260	transducin family protein / WD-40 repeat family protein similar to Vegetatible incompatibility protein HET-E-1 (SP:Q00808) {Podospora anserina}
A006596_01	2.5686	1.413	0.550106	2.45685	4.47718		A006596_01	At2g29350	1.231	0	1.45	-0.86	-1.04	1.948	2.017	2.06	3.485	3.902	3.273	3.949	4.873	4.768	3.614		0	0.1562	1.15294		2.06	2.6824	0.935558		3.949	4.0954	0.704729		At2g29350	tropinone reductase, putative / tropine dehydrogenase, putative similar to tropinone reductase SP:P50165 from [Datura stramonium]
A006614_01	3.02236	0.5822	0.192631	1.46352	2.16718		A006614_01	At2g37760	0.006	0.061	-0.282	-0.056	0	-0.491	-0.635	-0.821	0.055	-0.766	0.093	-0.072	0.03	0.235	-0.033		0	-0.0542	0.133911		-0.635	-0.5316	0.351829		0.03	0.0506	0.12067		At2g37760	aldo/keto reductase family protein similar to chalcone reductase [Sesbania rostrata][GI:2792155], and aldose reductase ALDRXV4 [Xerophyta viscosa][GI:4539944], [Hordeum vulgare][GI:728592]
A006661_01	3.11218	0.4704	0.151148	1.38678	1.7537		A006661_01	At2g16890	-0.231	0	-0.458	0.102	0.336	-0.617	-0.39	-0.197	-0.684	-0.426	-0.054	-0.029	-0.162	-0.073	0.356		0	-0.0502	0.305706		-0.426	-0.4628	0.193656		-0.054	0.0076	0.201108		At2g16890	UDP-glucoronosyl/UDP-glucosyl transferase family protein contains Pfam profile: PF00201 UDP-glucoronosyl and UDP-glucosyl transferase
A006794_01	3.30578	0.2232	0.0675181	1.16648	1.47491		A006794_01	At2g01060	-0.024	0.039	-0.524	0	0.401	0.058	0.12	0.026	0.153	-0.046	0.283	0.277	0.237	0.264	0.366		0	-0.0216	0.329826		0.058	0.0622	0.0784551		0.277	0.2854	0.0484076		At2g01060	myb family transcription factor contains Pfam profile: PF00249 myb-like DNA-binding domain
A006795_01	2.63305	0.6474	0.245874	1.52018	4.47718		A006795_01	At2g21560	0	0.408	-0.443	0.347	-0.152	-0.179	-0.758	-0.233	-0.75	-1.275	-0.04	0.287	-0.267	0.038	0.024		0	0.032	0.353944		-0.75	-0.639	0.449281		0.024	0.0084	0.198069		At2g21560	expressed protein contains weak similarity to reticulocyte-binding protein 2 homolog A [Plasmodium falciparum] gi|9754767|gb|AAF98066
A006797_01	3.00575	0.325	0.108126	1.24789	2.16718		A006797_01	At2g23070	-0.026	0.07	-0.028	0	0.139	-0.097	-0.12	-0.234	-0.184	-0.507	0.138	0.086	-0.033	0.116	0.176		0	0.031	0.0722426		-0.184	-0.2284	0.164801		0.116	0.0966	0.0795349		At2g23070	casein kinase II alpha chain, putative similar to casein kinase II, alpha chain (CK II) [Zea mays] SWISS-PROT:P28523; contains protein kinase domain, Pfam:PF00069
A006857_01	2.54168	0.2392	0.094111	1.1764	4.47718		A006857_01	At2g34520	0.059	0.149	-0.39	-0.187	0	0.167	0.323	0.168	0.117	-0.074	0.368	0.336	0.365	0.359	0.469		0	-0.0738	0.215359		0.167	0.1402	0.142589		0.365	0.3794	0.0516362		At2g34520	ribosomal protein S14 mitochondrial family protein identical to ribosomal protein S14 {Arabidopsis thaliana} NCBI_gi:4583554
A006885_01	3.16653	0.6096	0.192514	1.49946	1.7537		A006885_01	At2g02710	0.103	0.223	-0.316	-0.143	0	-0.246	-0.047	0.069	-0.055	-0.8	0.413	0.231	0.341	0.606	0.378		0	-0.0266	0.210419		-0.055	-0.2158	0.345566		0.378	0.3938	0.136875		At2g02710	PAC motif-containing protein similar to nonphototropic hypocotyl 1 [Zea mays] GI:2687358; contains Pfam profile PF00785: PAC motif
A006952_01	2.47448	0.4018	0.162377	1.30462	5.37887		A006952_01	At2g13840	-0.136	0.029	0	-0.108	0.312	0.025	0.143	0.13	-0.175	-0.539	0.346	0.348	0.436	0.144	0.319		0	0.0194	0.177808		0.025	-0.0832	0.284828		0.346	0.3186	0.107102		At2g13840	PHP domain-containing protein contains Pfam PF02231: PHP domain N-terminal region and Pfam PF02811: PHP domain C-terminal region; identical to Protein trpH. (Swiss-Prot:O54453) [Salmonella typhimurium]
A006970_01	2.78313	0.2392	0.0859465	1.17951	3.27795		A006970_01	At2g19870	-0.183	-0.025	0.072	0.205	0	0.259	0.213	0.2	0.319	0.041	0.482	0.49	0.497	0.462	0.297		0	0.0138	0.141749		0.213	0.2064	0.103546		0.482	0.4456	0.084097		At2g19870	tRNA/rRNA methyltransferase (SpoU) family protein similar to SP|P25270 Ribose methyltransferase PET56 (EC 2.1.1.-) {Saccharomyces cerevisiae}; contains Pfam profile PF00588: SpoU rRNA Methylase (RNA methyltransferase, TrmH) family
A006975_01	3.47156	0.6198	0.178537	1.54758	1.24313		A006975_01	At2g46680	0	0.033	0.25	-0.422	-0.569	-1.329	-1.372	-0.91	-1.285	-1.338	-0.576	-0.623	-0.513	-0.332	-1.091		0	-0.1416	0.341021		-1.329	-1.2468	0.190816		-0.576	-0.627	0.281928		At2g46680	homeobox-leucine zipper protein 7 (HB-7) / HD-ZIP transcription factor 7 identical to homeobox-leucine zipper protein ATHB-7 (HD-ZIP protein ATHB-7) (SP:P46897) [Arabidopsis thaliana];
A006996_01	3.1431	0.6002	0.190958	1.50922	1.7537		A006996_01	At2g02230	-0.021	0.036	-0.427	0.011	0	0.409	0.332	0.701	0.706	0.021	1.059	0.953	0.832	0.904	1.422		0	-0.0802	0.194953		0.409	0.4338	0.285863		0.953	1.034	0.232074		At2g02230	F-box family protein / SKP1 interacting partner 3-related contains similarity to SKP1 interacting partner 3 GI:10716951 from [Arabidopsis thaliana]
A007045_01	2.81186	0.3036	0.107971	1.23351	2.75256		A007045_01	At2g01440	0.044	-0.025	0	0.405	-0.175	0.065	-0.002	0.275	0.076	-0.086	0.459	0.393	0.489		0.176		0	0.0498	0.214948		0.065	0.0656	0.133706		0.426	0.37925	0.141309		At2g01440	ATP-dependent DNA helicase, putative
A007075_01	3.93738	0.6426	0.163205	1.54239	0.534461		A007075_01	At2g21180	-0.263	0	-0.59	0.406	0.172	-0.625	-0.252	-0.185	-0.801	-0.199	0.252	0.2	0.099	0.183	0.417		0	-0.055	0.386188		-0.252	-0.4124	0.282483		0.2	0.2302	0.118028		At2g21180	expressed protein
A007132_01	3.06083	0.313	0.10226	1.23801	2.16718		A007132_01	At2g21240	0	0.265	-0.086	-0.004	0.209	0.42	0.25	0.168	0.191	-0.004	0.551	0.6	0.474	0.552	0.413		0	0.0768	0.151515		0.191	0.205	0.152886		0.551	0.518	0.0740439		At2g21240	expressed protein
A007275_01	2.71561	0.2836	0.104433	1.22215	3.27795		A007275_01	At2g01540	0.039	0.118	-0.704	-0.364	0	0.253	0.196	0.261	0.305	0.117	0.516	0.779	0.438	0.447	0.37		0	-0.1822	0.345533		0.253	0.2264	0.0724141		0.447	0.51	0.15902		At2g01540	C2 domain-containing protein similar to zinc finger and C2 domain protein GI:9957238 from [Arabidopsis thaliana]
A007535_01	4.19759	0.4416	0.105203	1.36227	0.527996		A007535_01	At2g15960	-0.087	0	0.285	-0.177	0.069	0.464	0.36	0.285	0.507	0.38	1.059	0.871	0.657	0.74	0.877		0	0.018	0.175545		0.38	0.3992	0.0877023		0.871	0.8408	0.153115		At2g15960	expressed protein
A007696_01	3.80763	0.9258	0.243143	1.83242	0.760034		A007696_01	At2g39400	-0.056	-0.054	0.08	0	0.451	-1.128	-0.614	0.093	-0.181	-0.318	0.619	0.308	0.513	0.422	0.619		0	0.0842	0.21237		-0.318	-0.4296	0.466137		0.513	0.4962	0.133573		At2g39400	hydrolase, alpha/beta fold family protein similar to monoglyceride lipase from [Homo sapiens] GI:14594904, [Mus musculus] GI:2632162; contains Pfam profile PF00561: hydrolase, alpha/beta fold family
A007756_01	3.66133	0.8222	0.224563	1.72819	0.760034		A007756_01	At2g41250	0.012	0.054	-0.354	0	-0.114	-0.317	-0.368	-0.804	-0.894	-1.28	0.079	0.309	0.08	0.192	-0.212		0	-0.0804	0.165115		-0.804	-0.7326	0.398889		0.08	0.0896	0.193513		At2g41250	haloacid dehalogenase-like hydrolase family protein low similarity to SP|Q94915 Rhythmically expressed gene 2 protein (DREG-2) {Drosophila melanogaster}; contains InterPro accession IPR005834: Haloacid dehalogenase-like hydrolase
A007835_01	4.1519	0.3128	0.075339	1.24169	0.527996		A007835_01	At2g04410	0	0.07	-0.105	-0.092	0.257	0.365	0.479	0.472	0.469	0.6	0.788	0.759	0.73	0.76	0.912		0	0.026	0.147528		0.472	0.477	0.0833157		0.76	0.7898	0.0713246		At2g04410	expressed protein
A007844_01	2.61565	0.3298	0.126087	1.24938	4.47718		A007844_01	At2g36320	-0.109	0	-0.874	0.002	0.221	-0.457	-0.277	-0.2	-0.121	-0.619	0.065	0.012	-0.139	-0.059	0.096		0	-0.152	0.421035		-0.277	-0.3348	0.20182		0.012	-0.005	0.0952129		At2g36320	zinc finger (AN1-like) family protein contains Pfam domain, PF01428: AN1-like Zinc finger
A007852_01	2.62077	0.443	0.169035	1.33843	4.47718		A007852_01	At2g36340	-0.212	0.027	0.09	0	-0.391	0.314	0.469	0.095	0.232	-0.337	0.672	0.657	0.659	0.509	0.491		0	-0.0972	0.199634		0.232	0.1546	0.306378		0.657	0.5976	0.0895087		At2g36340	DNA-binding storekeeper protein-related contains similarity to storekeeper protein [Solanum tuberosum] gi|14268476|emb|CAC39398; contains PF04504: Protein of unknown function, DUF573
A007862_01	2.59846	0.338	0.130077	1.25541	4.47718		A007862_01	At2g43650	0	-0.042	0.333	0.127	-0.235	0.406	0.241	-0.114	0.151	-0.042	0.522	0.533	0.305	0.447	0.525		0	0.0366	0.21054		0.151	0.1284	0.210977		0.522	0.4664	0.0966788		At2g43650	Sas10/U3 ribonucleoprotein (Utp) family protein contains Pfam profile PF04000: Sas10/Utp3 family; contains Prosite PS00761: Signal peptidases I signature 3; weak similarity to PEBP2 beta-binding protein / charged amino acid rich leucine zipper factor-1 (G
A007867_01	2.96341	0.5856	0.19761	1.47494	2.16718		A007867_01	At2g36900	-0.067	0.304	-0.278	0	0.252	0.099	0.275	0.095	-0.069	-0.635	0.602	0.718	0.295	0.545	0.533		0	0.0422	0.239159		0.095	-0.047	0.350497		0.545	0.5386	0.15461		At2g36900	Golgi SNARE protein membrin 11 (MEMB11) / Golgi SNAP receptor complex member 2-1 identical to SP:Q9SJL6; identical to Probable 27 kDa Golgi SNARE protein (Golgi SNAP receptor complex member 2) (SP:Q9SJL6) [Arabidopsis thaliana]
A007901_01	2.60463	0.3254	0.124931	1.25657	4.47718		A007901_01	At2g27860	-0.172	0	-0.574	0.213	0.276	0.094	0.116	0.222	0.269	0.423	0.552	0.438	0.45	0.456	0.855		0	-0.0514	0.341832		0.222	0.2248	0.132468		0.456	0.5502	0.176358		At2g27860	expressed protein
A007977_01	3.49681	1.2544	0.358727	2.18449	1.24313		A007977_01	At2g18050	-0.809	0	0.225	0.262	-0.974	0.034	0.474	-0.024	-0.837	-1.312	0.915	1.132	0.658	0.972	0.93		0	-0.2592	0.588749		-0.024	-0.333	0.723512		0.93	0.9214	0.170592		At2g18050	histone H1-3 (HIS1-3) similar to histone H1 [Lycopersicon pennellii] SWISS-PROT:P40267; identical to cDNA histone H1-3 (His1-3) GI:1809314, histone H1-3 [Arabidopsis thaliana] GI:1809305
A008108_01	3.34929	0.5442	0.162482	1.4671	1.47491		A008108_01	At2g43060	0	-0.291	-1.04	0.255	0.078	-0.237	-0.062	0.052	-0.245	-0.4	0.632	0.149	0.154	0.258	0.636		0	-0.1996	0.509458		-0.237	-0.1784	0.175791		0.258	0.3658	0.248673		At2g43060	expressed protein similar to cDNA bHLH transcription factor (bHLH zeta gene) GI:32563005
A008214_01	2.79521	0.5144	0.184029	1.40119	2.75256		A008214_01	At2g07000	-0.219	0.198	-0.105	0	0.144	-0.516	-0.012	0.052	-0.683	-0.021	0.346	0.254	0.293	0.378	0.121		0	0.0036	0.172381		-0.021	-0.236	0.338214		0.293	0.2784	0.100091		At2g07000	expressed protein
A008459_01	3.5082	1.0104	0.288011	1.92467	1.24313		A008459_01	At2g45210	0.573	-0.464	-0.018	0.018		0.803	0.655	0.375	1.58	1.525	2.272	1.875	1.85	1.775	2.218		0	0.02725	0.424776		0.803	0.9876	0.53845		1.875	1.998	0.229259		At2g45210	auxin-responsive protein-related weakly similar to small auxin up RNA (GI:546362) {Arabidopsis thaliana}
A008500_01	3.04348	0.331	0.108757	1.25375	2.16718		A008500_01	At2g35940	-0.063	0	0.081	0.654	-0.063	-0.253	-0.238	-0.257	-0.219	0.11	0.14	0.112	0.275	0.233	0.038		0	0.1218	0.303331		-0.238	-0.1714	0.158014		0.14	0.1596	0.0950542		At2g35940	homeodomain-containing protein contains 'Homeobox' domain signature, Prosite:PS00027
A008572_01	3.55115	0.3932	0.110725	1.31757	1.02009		A008572_01	At2g42280	0	-0.059	-0.094	0.116	0.003	-0.36	-0.39	-0.304	-0.274	-0.526	-0.144	-0.112	0.013	0.106	0.249		0	-0.0068	0.0799231		-0.36	-0.3708	0.0979857		0.013	0.0224	0.161382		At2g42280	basic helix-loop-helix (bHLH) family protein
A008604_01	2.54767	0.2994	0.117519	1.22627	4.47718		A008604_01	At2g37340	-0.423	0.003	0.041	0	-0.163	0.036	-0.006	-0.359	-0.21	-0.286	0.284	0.085	-0.008	0.14	0.171		0	-0.1084	0.192636		-0.21	-0.165	0.173194		0.14	0.1344	0.107784		At2g37340	splicing factor RSZ33 (RSZ33) nearly identical to splicing factor RSZ33 [Arabidopsis thaliana] GI:9843663; contains Pfam profiles PF00076: RNA recognition motif. (a.k.a. RRM, RBD, or RNP domain), PF00098: Zinc knuckle
A008667_01	2.46523	0.3754	0.152278	1.28648	5.37887		A008667_01	At2g46030	0.094	-0.033	-0.214	0	0.342	-0.373	-0.203	-0.358	-0.306	-0.853	-0.067	0.008	-0.172	-0.132	0.147		0	0.0378	0.203434		-0.358	-0.4186	0.251802		-0.067	-0.0432	0.126332		At2g46030	ubiquitin-conjugating enzyme 6 (UBC6) E2; identical to gi|431267, SP:P42750, PIR:S52661; contains a ubiquitin-conjugating enzymes active site (PDOC00163)
A008742_01	3.17639	0.5296	0.16673	1.437	1.7537		A008742_01	At2g33380	0.146	0	0.281	-0.69	-0.764	-0.685	-0.75	-0.59	-0.572	-1.188	-0.377	-0.135	-0.231	0.036	-0.43		0	-0.2054	0.487116		-0.685	-0.757	0.251549		-0.231	-0.2274	0.187987		At2g33380	calcium-binding RD20 protein (RD20) induced by abscisic acid during dehydration PMID:10965948; putative transmembrane channel protein PMID:10965948; identical to GI:10862968 [Arabidopsis thaliana]; contains EF-hand domain
A008794_01	2.8521	0.2366	0.0829564	1.17757	2.75256		A008794_01	At2g34750	-0.274	0	0.573	0.097	-0.1	0.111	0.105	0.046	0.082	0.295	0.372	0.315	0.351	0.498	0.286		0	0.0592	0.318312		0.105	0.1278	0.096885		0.351	0.3644	0.0816597		At2g34750	RNA polymerase I specific transcription initiation factor RRN3 family protein contains Pfam PF05327: RNA polymerase I specific transcription initiation factor RRN3; similar to RRN3 (GI:7670100) [Homo sapiens] similar to RNA polymerase I specific transcrip
A008840_01	2.84352	0.3716	0.130683	1.29573	2.75256		A008840_01	At2g45620	-0.383	-0.095	0.343	0.439	0	0.14	0.227	0.351	-0.066	0.142	0.708	0.432	0.279	0.562	0.671		0	0.0608	0.334515		0.142	0.1588	0.152285		0.562	0.5304	0.176913		At2g45620	nucleotidyltransferase family protein low similarity to SP|O13833| Caffeine-induced death protein 1 {Schizosaccharomyces pombe}; contains Pfam profiles PF03828: PAP/25A associated domain, PF01909: Nucleotidyltransferase domain
A008873_01	4.41776	1.5904	0.360001	2.86685	0.21257		A008873_01	At3g04070	0	0.391	-0.182	0.168	-0.775	1.077	0.748	0.329	0.763	-0.608	2.234	2.047	2.189	2.35	1.441		0	-0.0796	0.442485		0.748	0.4618	0.654448		2.189	2.0522	0.358484		At3g04070	no apical meristem (NAM) family protein contains Pfam PF02365: No apical meristem (NAM) domain; similar to NAM GB:CAA63101 [Petunia x hybrida]
A009139_01	3.88701	0.8556	0.220118	1.81353	0.534461		A009139_01	At3g51600	0	-0.002	-0.478	0.162	0.387	-0.286	0.118	0.195	-0.103	-0.524	0.939	0.241	0.653	0.778	1.067		0	0.0138	0.317627		-0.103	-0.12	0.294504		0.778	0.7356	0.317981		At3g51600	nonspecific lipid transfer protein 5 (LTP5) identical to SP|Q9XFS7 Nonspecific lipid-transfer protein 5 (LTP 5) {Arabidopsis thaliana}
A009205_01	3.63453	0.5748	0.15815	1.50313	1.02009		A009205_01	At3g01470	-0.284	0	-0.36	0.43	0.308	-0.281	-0.04	-0.018	-0.057	0.122	0.648	0.421	0.306	0.317	0.908		0	0.0188	0.349375		-0.04	-0.0548	0.144916		0.421	0.52	0.256775		At3g01470	homeobox-leucine zipper protein 5 (HAT5) / HD-ZIP protein 5 / HD-ZIP protein (HB-1) identical to homeobox-leucine zipper protein HAT5 (HD-ZIP protein 5) (HD-ZIP protein ATHB-1) GB:Q02283 [Arabidopsis thaliana]
A009209_01	2.51354	0.3528	0.14036	1.276	5.37887		A009209_01	At3g07660	-0.24	-0.018	0.681	0.467	0	0.579	0.526	0.513	0.32	0.838	0.983	0.86	0.819	0.711	1.167		0	0.178	0.381233		0.526	0.5552	0.186074		0.86	0.908	0.174456		At3g07660	expressed protein
A009501_01	2.98845	0.3626	0.121334	1.28863	2.16718		A009501_01	At3g48740	-0.175	0	-0.778	0.229	0.086	-0.312	-0.485	-0.378	-0.315	-0.129	0.13	-0.163	-0.055	0.009	0.273		0	-0.1276	0.391898		-0.315	-0.3238	0.129506		0.009	0.0388	0.168506		At3g48740	nodulin MtN3 family protein similar to MtN3 GI:1619602 (root nodule development) from [Medicago truncatula]
A009535_01	2.66102	0.8132	0.305597	1.64595	4.47718		A009535_01	At3g49790	-0.224	0.176	-0.719	0	0.226	-0.448	-0.091	0.431	-0.449	-1.238	0.497	0.238	0.406	0.555	0.575		0	-0.1082	0.38427		-0.448	-0.359	0.609218		0.497	0.4542	0.137523		At3g49790	expressed protein predicted protein, Arabidopsis thaliana
A009763_01	2.46948	0.5332	0.215916	1.41794	5.37887		A009763_01	At3g23880	0	0.214	-0.413	-0.115	0.067	-0.536	-0.232	-0.177	-0.861	-1.044	-0.249	-0.011	-0.098	-0.086	0.26		0	-0.0494	0.235519		-0.536	-0.57	0.380528		-0.086	-0.0368	0.18705		At3g23880	F-box family protein contains F-box domain Pfam:PF00646
A009822_01	4.09718	0.6884	0.168018	1.58494	0.527996		A009822_01	At3g11600	-0.149	0	0.503	-0.451	0.215	-0.058	0.549	0.065	-0.262	0.205	0.823	0.756	0.704	0.731	0.927		0	0.0236	0.361266		0.065	0.0998	0.30408		0.756	0.7882	0.0892676		At3g11600	expressed protein weak similarity to B-type cyclin (GI:849074) [Nicotiana tabacum]
A009836_01	3.38204	0.9942	0.293964	1.88838	1.24313		A009836_01	At3g01970	0.047	-0.014	0.618	0	-0.074	-0.336	-0.083	-0.222	0.599	0.939	1.458	1.062	1.244	0.884	1.22		0	0.1154	0.284262		-0.083	0.1794	0.558719		1.22	1.1736	0.21466		At3g01970	WRKY family transcription factor similar to WRKY1 GB:AAC49527 [Petroselinum crispum]
A010007_01	4.26712	0.393	0.0920996	1.31621	0.527996		A010007_01	At3g10572	-0.171	0	0.023	-0.327	0.128	-0.333	-0.288	-0.196	-0.258	-0.378	-0.011	0.157	0.06	0.004	0.302		0	-0.0694	0.179584		-0.288	-0.2906	0.0697409		0.06	0.1024	0.129577		At3g10572	3-phosphoinositide-dependent protein kinase-1, putative annotation temporarily based on supporting cDNA gi|17065215|gb|AY062684.1|
A010057_01	2.49528	0.7628	0.305697	1.71169	5.37887		A010057_01	At3g29035	-0.335	0.182	0.121	0	-0.03	-1.168	-0.633	-0.096	-0.214	-0.353	-0.022	-0.019	0.644	0.874	-0.127		0	-0.0124	0.200076		-0.353	-0.4928	0.427281		-0.019	0.27	0.45582		At3g29035	no apical meristem (NAM) family protein contains Pfam PF02365 : No apical meristem (NAM) protein; similar to cup-shaped cotyledon CUC2 (GI:1944132) [Arabidopsis thaliana]
A010200_01	2.63848	0.3514	0.133183	1.27032	4.47718		A010200_01	At3g03880	0	0.304	-0.088	-0.02	0.179	-0.167	0.041	0.254	0.14	-0.215	0.241	0.223	0.412	0.54	0.394		0	0.075	0.161614		0.041	0.0106	0.199593		0.394	0.362	0.131501		At3g03880	expressed protein
A010262_01	2.96333	0.3528	0.119055	1.27147	2.16718		A010262_01	At3g53970	0	0.198	-0.509	0.202	-0.073	-0.009	-0.031	0.184	0.152	-0.274	0.357	0.227	0.296	0.447	0.459		0	-0.0364	0.2906		-0.009	0.0044	0.182333		0.357	0.3572	0.0988999		At3g53970	proteasome inhibitor-related similar to proteasome inhibitor PI31 subunit (hPI31) SP:Q92530 from [Homo sapiens]
A010276_01	2.49466	0.4488	0.179904	1.34073	5.37887		A010276_01	At3g54500	0.045	-0.07	0	0.269	-0.118	-0.55	-0.539	-0.838	-0.873	-1.348	-0.306	-0.246	-0.459	-0.439	-0.454		0	0.0252	0.150029		-0.838	-0.8296	0.329134		-0.439	-0.3808	0.0982685		At3g54500	expressed protein
A010318_01	2.80629	0.5984	0.213235	1.47154	2.75256		A010318_01	At3g51730	0	0.15	-0.448	-0.132	0.239	-0.249	0.013	0.286	-0.142	-0.815	0.583	0.394	0.373	0.357	0.378		0	-0.0382	0.269468		-0.142	-0.1814	0.407377		0.378	0.417	0.093731		At3g51730	saposin B domain-containing protein contains Pfam profiles: PF00026 eukaryotic aspartyl protease, PF03489 surfactant protein B, PF05184 saposin-like type B, region 1
A010364_01	2.51435	0.6682	0.265755	1.5249	5.37887		A010364_01	At3g11100	-0.031	0.368	-0.379	0.131	0	0.176	0.18	0.524	-0.107	-0.836	0.578	0.785	0.729	0.771	0.415		0	0.0178	0.271847		0.176	-0.0126	0.511738		0.729	0.6556	0.157606		At3g11100	expressed protein similar to 6b-interacting protein 1 (NtSIP1) [Nicotiana tabacum] GI:18149189
A010456_01	2.9296	0.302	0.103086	1.22699	2.16718		A010456_01	At3g24200	0.127	0	-0.109	0.03	-0.037	-0.269	-0.236	-0.131	-0.435	-0.545	-0.046	-0.048	0.026	0.032	-0.07		0	0.0022	0.0869695		-0.269	-0.3232	0.16521		-0.046	-0.0212	0.0468316		At3g24200	monooxygenase family protein low similarity to VisC [Escherichia coli][GI:216629]; contains Pfam profile: PF01360 Monooxygenase
A010667_01	2.66156	0.6982	0.262327	1.55628	4.47718		A010667_01	At3g19520	0.058	0.201	-0.677	0	-0.003	0.205	0.276	0.32	0.139	-0.911	0.582	0.796	0.599	0.748	0.795		0	-0.0842	0.341561		0.205	0.0058	0.517125		0.748	0.704	0.105582		At3g19520	expressed protein contains Pfam profile PF04776: Protein of unknown function (DUF626)
A010682_01	3.05504	0.4038	0.132175	1.33433	2.16718		A010682_01	At3g58180	0.165	0.035	-0.327	-0.1	0	0.115	0.21	0.074	0.262	0.151	0.741	0.609	0.353	0.315	0.813		0	-0.0454	0.183762		0.151	0.1624	0.0747951		0.609	0.5662	0.22464		At3g58180	PBS lyase HEAT-like repeat-containing protein contains Pfam profile: PF03130: PBS lyase HEAT-like repeat; contains alternative donor splice site TT at exon 2,hypothetical protein C14A4.1 - Caenorhabditis elegans, PIR:T19243
A010696_01	2.94467	0.358	0.121576	1.27855	2.16718		A010696_01	At3g04520	0.019	-0.018	-0.32	0	0.276	-0.19	-0.096	-0.125	-0.274	-0.523	0.136	0.252	0.044	-0.06	0.21		0	-0.0086	0.211478		-0.19	-0.2416	0.171532		0.136	0.1164	0.126384		At3g04520	threonine aldolase family protein similar to L-allo-threonine aldolase SP:O07051 from [Aeromonas jandaei]
A010711_01	2.65887	0.454	0.170749	1.36806	4.47718		A010711_01	At3g56080	0	-0.008	-0.74	0.215	0.334	-0.669	-0.568	-0.733	-0.953	-1.154	-0.573	-0.164	-0.243	-0.2	-0.627		0	-0.0398	0.41759		-0.733	-0.8154	0.236121		-0.243	-0.3614	0.220428		At3g56080	dehydration-responsive protein-related similar to early-responsive to dehydration stress ERD3 protein [Arabidopsis thaliana] GI:15320410; contains Pfam profile PF03141: Putative methyltransferase
A010743_01	2.85863	0.4654	0.162805	1.36868	2.75256		A010743_01	At3g10810	-0.263	0	-0.484	0.541	0.282	-0.402	-0.461	-0.183	-0.646	-0.884	0.079	-0.211	-0.041	-0.197	0.121		0	0.0152	0.410632		-0.461	-0.5152	0.264211		-0.041	-0.0498	0.152883		At3g10810	zinc finger (C3HC4-type RING finger) family protein contains Pfam profile: PF00097 Zinc finger, C3HC4 type (RING finger)
A010853_01	2.54074	0.3208	0.126262	1.25335	4.47718		A010853_01	At3g23920	0	-0.074	-0.612	0.21	0.011	-0.304	-0.469	-0.451	-0.159	-0.294	0.111	-0.156	-0.099	-0.173	0.244		0	-0.093	0.308624		-0.304	-0.3354	0.127504		-0.099	-0.0146	0.183615		At3g23920	beta-amylase, putative / 1,4-alpha-D-glucan maltohydrolase, putative similar to beta-amylase enzyme [Arabidopsis thaliana] GI:6065749, beta-amylase PCT-BMYI from [Solanum tuberosum]; contains Pfam profile PF01373: Glycosyl hydrolase family 14
A010857_01	3.07807	0.5024	0.163219	1.41877	1.7537		A010857_01	At3g24080	0.006	-0.098	0	0.086	-0.525	0.369	0.514	0.131	-0.005	0.167	0.953	0.777	0.575	0.439	0.944		0	-0.1062	0.243037		0.167	0.2352	0.205449		0.777	0.7376	0.227019		At3g24080	KRR1 family protein contains Pfam PF05178: Krr1 family
A010872_01	2.53502	0.4618	0.182168	1.35553	4.47718		A010872_01	At3g58670	-0.054	0.082	0.164	-0.205	0	-0.268	-0.322	-0.218	-0.235	-0.988	-0.089	0.1	0.012	0.024	0.231		0	-0.0026	0.140114		-0.268	-0.4062	0.327646		0.024	0.0556	0.118896		At3g58670	expressed protein
A010893_01	2.92607	0.2012	0.0687611	1.14935	2.16718		A010893_01	At3g15290	-0.023	-0.026	0	0.158	0.231	0.101	0.097	0.129	0.172	0.271	0.368	0.346	0.283	0.328	0.451		0	0.068	0.118754		0.129	0.154	0.0719305		0.346	0.3552	0.0620056		At3g15290	3-hydroxybutyryl-CoA dehydrogenase, putative similar to S(+)-beta-hydroxybutyryl CoA dehydrogenase (3-hydroxybutyryl-CoA dehydrogenase) [Paracoccus denitrificans] GI:12003356; contains Pfam profiles PF02737: 3-hydroxyacyl-CoA dehydrogenase NAD binding, PF
A010911_01	2.63525	0.5122	0.194365	1.44025	4.47718		A010911_01	At3g47800	-0.157	0	0.046	-0.242	0.286	1.087	0.918	0.595	0.874	1.159	1.467	1.424	1.212	1.16	1.931		0	-0.0134	0.203855		0.918	0.9266	0.219395		1.424	1.4388	0.30514		At3g47800	aldose 1-epimerase family protein similar to ALDOSE 1-EPIMERASE PRECURSOR GB:P05149 [SP|P05149] from [Acinetobacter calcoaceticus]; contains Pfam profile PF01263 Aldose 1-epimerase
A011094_01	6.17761	0.7688	0.124449	1.69936	0		A011094_01	At3g21790	0	0.357	-0.936	-0.078	0.161	-0.069	0.105	0.306	0	-0.144	0.865	0.982	0.788	0.618	0.789		0	-0.0992	0.496575		0	0.0396	0.174869		0.789	0.8084	0.132651		At3g21790	UDP-glucoronosyl/UDP-glucosyl transferase family protein contains Pfam profile: PF00201 UDP-glucoronosyl and UDP-glucosyl transferase
A011130_01	3.17984	0.418	0.131453	1.34135	1.7537		A011130_01	At3g14280	0.678	0.121	-0.405	-0.145	0	-0.372	-0.417	-0.273	-0.098	-0.382	0.192	0.339	0.121	0.094	-0.198		0	0.0498	0.402174		-0.372	-0.3084	0.129206		0.121	0.1096	0.196472		At3g14280	expressed protein
A011198_01	16.2805	3.2756	0.201198	9.59838	0		A011198_01	At3g60140	-1.732	0.437	2.494	-0.437		1.137	0.461	0.35	0.779	0.852	4.33	3.681	3.949	4.01	3.987		0	0.1905	1.77545		0.779	0.7158	0.315708		3.987	3.9914	0.230847		At3g60140	glycosyl hydrolase family 1 protein contains Pfam PF00232 : Glycosyl hydrolase family 1 domain; TIGRFAM TIGR01233: 6-phospho-beta-galactosidase; similar to Cyanogenic Beta-Glucosidase (GI:1311386)(pdb:1CBG) [Trifolium Repens]; identical beta-glucosidase G
A011200_01	3.35663	0.4748	0.141451	1.38697	1.47491		A011200_01	At3g60180	0	0.306	0.195	-0.222	-0.216	0.381	0.521	0.257	0.432	0.008	0.715	1.078	0.753	0.767	0.66		0	0.0126	0.238121		0.381	0.3198	0.198733		0.753	0.7946	0.163754		At3g60180	uridylate kinase, putative / uridine monophosphate kinase, putative / UMP kinase, putative similar to uridylate kinase (EC 2.7.4.-) (UK) (Uridine monophosphate kinase) (UMP kinase) (UMP/CMP kinase) (Swiss-Prot:O04905) [Arabidopsis thaliana]
A011231_01	3.73196	0.567	0.151931	1.46324	0.760034		A011231_01	At3g43440	-0.105	0.193	0	-0.092	0.203	-0.367	-0.351	-0.371	-0.262	-0.94	0.04	0.158	0.167	0.033	0.146		0	0.0398	0.150022		-0.367	-0.4582	0.272965		0.146	0.1088	0.0664658		At3g43440	expressed protein
A011301_01	2.6648	0.2856	0.107175	1.21308	3.27795		A011301_01	At3g26080	0	0.164	-0.088	-0.086	0.023	0.076	0.303	0.249	0.172	-0.131	0.439	0.503	0.417	0.341	0.397		0	0.0026	0.103115		0.172	0.1338	0.170894		0.417	0.4194	0.0592182		At3g26080	plastid-lipid associated protein PAP / fibrillin family protein low similarity to Plastid-lipid-Associated Protein [Nicotiana tabacum] GI:2632088; contains Pfam profile PF04755: PAP_fibrillin
A011500_01	4.89128	1.4946	0.305564	2.74034	0.21257		A011500_01	At3g09270	-0.005	0.023	-0.276	0.005		1.376	1.206	0.678	1.546	2.103	3.267	2.772	2.563	2.555	3.225		0	-0.06325	0.142306		1.376	1.3818	0.518017		2.772	2.8764	0.34875		At3g09270	glutathione S-transferase, putative similar to glutathione transferase GB:CAA71784 [Glycine max]
A011648_01	3.31635	0.2976	0.0897372	1.22975	1.47491		A011648_01	At3g54660	0	-0.115	-0.094	0.353	0.026	-0.896	-0.863	-0.724	-0.765	-0.95	-0.633	-0.652	-0.499	-0.389	-0.537		0	0.034	0.188126		-0.863	-0.8396	0.0933343		-0.537	-0.542	0.106846		At3g54660	gluthatione reductase, chloroplast nearly identical to SP|P42770 Glutathione reductase, chloroplast precursor (EC 1.8.1.7) (GR) (GRASE) {Arabidopsis thaliana}; identical to cDNA glutathione reductase GI:451197
A011649_01	4.57774	0.3224	0.0704277	1.24904	0.21257		A011649_01	At3g10770	-0.132	0.021	0.324	-0.18	0	0.035	-0.07	-0.111	-0.022	0.112	0.306	0.282	0.269	0.314	0.385		0	0.0066	0.196865		-0.022	-0.0112	0.0878163		0.306	0.3112	0.0450411		At3g10770	expressed protein
A011658_01	6.39085	1.2132	0.189834	2.26213	0		A011658_01	At3g17790	0	0.121	-0.242	0.128	-0.395	-1.482	-1.105	-0.87	-1.15	-0.51	0.254	0.136	0.156	0.258	0.145		0	-0.0776	0.232113		-1.105	-1.0234	0.360594		0.156	0.1898	0.0608621		At3g17790	acid phosphatase type 5 (ACP5) contains Pfam profile: PF00149 calcineurin-like phosphoesterase; nearly identical to acid phosphatase type 5 (GI:10278031) [Arabidopsis thaliana]
A011677_01	2.65987	0.2638	0.0991779	1.19991	4.47718		A011677_01	At3g45600	-0.109	0	-0.124	0.304	0.205	-0.134	0.103	0.146	-0.098	-0.006	0.285	0.296	0.194	0.136	0.419		0	0.0552	0.191352		-0.006	0.0022	0.12196		0.285	0.266	0.108113		At3g45600	senescence-associated family protein similar to senescence-associated protein 5 [Hemerocallis hybrid cultivar] gi|3551954|gb|AAC34855
A011684_01	2.47571	0.4742	0.191541	1.41231	5.37887		A011684_01	At3g53630		0.013	-0.581	-0.013	0.323	-0.007	0.085	-0.094	0.124	-0.289	0.548	0.416	0.066	0.229	0.931		0	-0.0645	0.376646		-0.007	-0.0362	0.164662		0.416	0.438	0.330794		At3g53630	expressed protein predicted proteins, Arabidopsis thaliana
A011717_01	2.46726	0.5274	0.21376	1.41493	5.37887		A011717_01	At3g11830	-0.257	0	0.09	0.104	-0.092	0.363	0.082	-0.451	-0.1	-0.514	0.58	0.436	0.082	0.355	0.564		0	-0.031	0.148849		-0.1	-0.124	0.367155		0.436	0.4034	0.202289		At3g11830	chaperonin, putative similar to SWISS-PROT:P80313 T-complex protein 1, eta subunit (TCP-1-eta) [Mus musculus]; contains Pfam:PF00118 domain, TCP-1/cpn60 chaperonin family
A011743_01	3.5245	0.5328	0.15117	1.43097	1.02009		A011743_01	At3g19290	-0.17	0.043	-0.445	0.313	0	-0.251	-0.109	-0.025	-0.488	-0.65	0.298	0.16	0.092	0.26	0.331		0	-0.0518	0.279878		-0.251	-0.3046	0.260886		0.26	0.2282	0.0995651		At3g19290	ABA-responsive element-binding protein 2 (AREB2) almost identical (one amino acid) to GB:AAF27182 from (Arabidopsis thaliana); contains Pfam profile PF00170:bZIP transcription factor; identical to cDNA abscisic acid responsive elements-binding factor (ABR
A011912_01	3.19662	0.7896	0.247011	1.68169	1.7537		A011912_01	At3g45300	0.074	0	-0.894	-0.315	0.229	-0.2	-0.15	0.429	-0.065	-0.813	0.923	0.379	0.494	0.58	0.773		0	-0.1812	0.445031		-0.15	-0.1598	0.442734		0.58	0.6298	0.218114		At3g45300	isovaleryl-CoA-dehydrogenase (IVD) identical to isovaleryl-CoA-dehydrogenase precursor [Arabidopsis thaliana] GI:5596622
A011977_01	2.55142	0.4702	0.184289	1.37494	4.47718		A011977_01	At3g54380	0	0.256	0.395	-0.15	-0.297	0.119	0.202	0.231	0.135	-0.471	0.457	0.672	0.566	0.678	0.194		0	0.0408	0.284582		0.135	0.0432	0.291145		0.566	0.5134	0.200132		At3g54380	SAC3/GANP family protein contains Pfam profile: PF03399 SAC3/GANP family
A011996_01	2.82453	0.2012	0.0712331	1.15062	2.75256		A011996_01	At3g09650	-0.016	-0.023	0	0.176	0.059	-0.271	-0.308	-0.239	-0.302	-0.178	0.046	-0.035	-0.017	-0.171	-0.115		0	0.0392	0.0830042		-0.271	-0.2596	0.0532757		-0.035	-0.0584	0.0852103		At3g09650	pentatricopeptide (PPR) repeat-containing protein contains Pfam profile PF01535: PPR repeat
A012079_01	2.50299	0.2096	0.0837398	1.15582	5.37887		A012079_01	At3g26730	-0.027	0	-0.053	0.481	0.118	-0.193	-0.22	-0.153	-0.173	-0.397	0.099	-0.111	0.007	0	-0.083		0	0.1038	0.220766		-0.193	-0.2272	0.098103		0	-0.0176	0.0829325		At3g26730	zinc finger (C3HC4-type RING finger) family protein contains Pfam profile: PF00097 zinc finger, C3HC4 type (RING finger)
A012086_01	3.16352	0.2508	0.0792788	1.18949	1.7537		A012086_01	At3g17000	-0.065	-0.062	0	0.052	0.12	-0.393	-0.436	-0.454	-0.456	-0.246	-0.135	-0.215	-0.236	-0.098	-0.047		0	0.009	0.0786893		-0.436	-0.397	0.0881306		-0.135	-0.1462	0.0791941		At3g17000	ubiquitin-conjugating enzyme, putative similar to Non-Canonical UBiquitin Conjugating Enzyme 1 (NCUBE1) from [Gallus gallus] GI:7362937, [Mus musculus] GI:7363050, [Homo sapiens] GI:7362973; contains Pfam profile PF00179: Ubiquitin-conjugating enzyme
A012171_01	4.4014	0.3806	0.0864726	1.29926	0.21257		A012171_01	At3g04780	0.014	0	0.359	-0.368	-0.033	0.105	-0.094	0.009	0.075	-0.183	0.367	0.454	0.38	0.301	0.313		0	-0.0056	0.257601		0.009	-0.0176	0.119903		0.367	0.363	0.0610942		At3g04780	expressed protein
A012219_01	2.68611	0.2496	0.0929225	1.19109	3.27795		A012219_01	At3g01740	0.053	-0.018	-0.446	0	0.186	0.104	0.241	0.17	0.101	0.277	0.568	0.349	0.358	0.305	0.561		0	-0.045	0.237971		0.17	0.1786	0.0794311		0.358	0.4282	0.126054		At3g01740	expressed protein
A012256_01	4.7263	1.5798	0.334257	2.96758	0.21257		A012256_01	At3g10320	0.279	-0.764	-0.279	0.354		-0.78	-0.644	-1.207	-0.696	0.137	1.362	0.811	1.195	1.192	0.149		0	-0.1025	0.523663		-0.696	-0.638	0.486814		1.192	0.9418	0.487062		At3g10320	expressed protein contains Pfam domain, PF04577: Protein of unknown function (DUF563)
A012310_01	3.59923	0.3688	0.102466	1.28722	1.02009		A012310_01	At3g08700	-0.15	0.064	-0.375	0	0.212	-0.275	-0.116	0.039	-0.191	-0.351	0.194	0.099	0.184	0.317	0.156		0	-0.0498	0.223475		-0.191	-0.1788	0.150364		0.184	0.19	0.0800281		At3g08700	ubiquitin-conjugating enzyme, putative strong similar to ubiquitin-conjugating enzymes E2-17 from [Arabidopsis thaliana] SP|P35134, SP|P35132, SP|P35133; contains Pfam profile PF00179: Ubiquitin-conjugating enzyme
A012359_01	2.9975	0.319	0.106422	1.24164	2.16718		A012359_01	At3g26618	0	0.083	0.526	-0.046	-0.097	0.198	0.29	0.423	0.166	-0.034	0.58	0.52	0.445	0.498	0.595		0	0.0932	0.250828		0.198	0.2086	0.168356		0.52	0.5276	0.0613294		At3g26618	eukaryotic release factor 1 family protein / eRF1 family protein contains Pfam profiles: PF03463 eRF1 domain 1, PF03464 eRF1 domain 2, PF03465 eRF1 domain 3
A012502_01	3.8025	0.3312	0.0871006	1.25775	0.760034		A012502_01	At3g07870	-0.124	0.047	0	-0.205	0.091	-0.453	-0.294	-0.18	-0.345	-0.348	-0.131	0.072	0.006	0.11	-0.021		0	-0.0382	0.12308		-0.345	-0.324	0.0991136		0.006	0.0072	0.0930897		At3g07870	F-box family protein contains F-box domain Pfam:PF00646
A012533_01	2.89882	0.3204	0.110528	1.24683	2.75256		A012533_01	At3g54760	-0.058	-0.027	0.347	0.456	0	0.353	0.331	0.016	0.26	0.102	0.635	0.408	0.417	0.547	0.657		0	0.1436	0.239444		0.26	0.2124	0.147361		0.547	0.5328	0.117321		At3g54760	dentin sialophosphoprotein-related contains weak similarity to Swiss-Prot:Q9NZW4 dentin sialophosphoprotein precursor (Dentin phosphophoryn DPP, Dentin sialoprotein DSP) [Homo sapiens]
A012540_01	2.45468	0.42324	0.172422	1.33599	5.37887		A012540_01	At3g54650		-0.203	-0.978	0.203	1.318	-0.397	-0.761	-0.477	-1.029		-0.128	-0.341	-0.288	-0.434	0.088		0	0.085	0.956927		-0.619	-0.666	0.288025		-0.288	-0.2206	0.205175		At3g54650	F-box family protein (FBL17) contains similarity to F-box protein FBL2 GI:6010699 from [Rattus norvegicus]
A012572_01	2.70536	0.3568	0.131886	1.28593	3.27795		A012572_01	At3g06510	0	0.178	-0.688	0.048	-0.128	-0.324	-0.06	-0.022	-0.228	-0.253	0.067	0.144	0.391	0.365	-0.07		0	-0.118	0.336933		-0.228	-0.1774	0.130095		0.144	0.1794	0.197046		At3g06510	glycosyl hydrolase family 1 protein similar to Beta-galactosidase (SP:P22498) [Sulfolobus solfataricus}; almost identical to beta-glucosidase GB:AAF23823 GI:6685165 from [Arabidopsis thaliana]
A012649_01	4.52274	0.7338	0.162247	1.67651	0.21257		A012649_01	At3g03640	0.24	0	0.307	-0.077	-0.204	0.557	0.747	1.009	0.843	0.842	1.431	1.968	1.305	1.524	1.439		0	0.0532	0.215199		0.842	0.7996	0.16519		1.439	1.5334	0.25521		At3g03640	glycosyl hydrolase family 1 protein contains Pfam PF00232 : Glycosyl hydrolase family 1 domain; TIGRFAM TIGR01233: 6-phospho-beta-galactosidase; identical to beta-glucosidase GB:AAC31962 [Arabidopsis thaliana]; similar to thioglucoside glucohydrolase (GI:
A012706_01	3.395	0.3502	0.103152	1.27613	1.24313		A012706_01	At3g29090	0.016	0.023	-0.114	0	-0.066	-0.065	-0.079	-0.292	-0.262	-0.249	0.164	0.283	-0.037	0.112	0.282		0	-0.0282	0.0594996		-0.249	-0.1894	0.108413		0.164	0.1608	0.133359		At3g29090	pectinesterase family protein similar to pectinesterase precursor GB:Q43043 [Petunia integrifolia]; contains Pfam profile: PF01095 pectinesterase
A012801_01	2.53715	0.3944	0.15545	1.30236	4.47718		A012801_01	At3g16740	0.095	0.031	-0.79	-0.079	0	-0.046	0.036	0.087	-0.222	-0.554	0.125	0.45	0.252	0.283	0.163		0	-0.1486	0.363977		-0.046	-0.1398	0.259548		0.252	0.2546	0.12667		At3g16740	F-box family protein contains F-box domain Pfam:PF00646
A012865_01	3.44436	0.762	0.221231	1.69846	1.24313		A012865_01	At4g19420	-0.03	0.061	0	0.152	-0.061	-1.079	-0.789	-0.314	-0.477	-0.818	-0.045	-0.325	0.316	0.454	-0.067		0	0.0244	0.0843641		-0.789	-0.6954	0.301706		-0.045	0.0666	0.314616		At4g19420	pectinacetylesterase family protein contains Pfam profile: PF03283 pectinacetylesterase
A012866_01	3.8781	0.4486	0.115675	1.36456	0.534461		A012866_01	At4g23450	-0.06	0	-0.253	0.197	0.656	-0.04	0.164	0.331	0.277	0.152	0.459	0.677	0.687	0.506	0.798		0	0.108	0.345845		0.164	0.1768	0.142828		0.677	0.6254	0.139815		At4g23450	zinc finger (C3HC4-type RING finger) family protein contains Pfam profile: PF00097 zinc finger, C3HC4 type
A012880_01	7.78525	3.473	0.4461	11.2558	0		A012880_01	At4g11650	0.139	-0.215	-0.785	0.29	0	0.807	0.088	-0.943	0.138	0.301	2.546	3.261	4.083	4.271	3.595		0	-0.1142	0.418528		0.138	0.0782	0.63783		3.595	3.5512	0.688746		At4g11650	osmotin-like protein (OSM34) nearly identical to SP|P50700|OSL3_ARATH Osmotin-like protein OSM34 precursor {Arabidopsis thaliana}; contains Pfam profile PF00314: Thaumatin family
A013121_01	3.76755	0.5718	0.15177	1.47107	0.760034		A013121_01	At4g33080	-0.282	0.114	-0.592	0.304	0	-0.395	-0.258	-0.446	-0.419	-0.942	0.072	0.105	-0.05	0.228	0.044		0	-0.0912	0.351359		-0.419	-0.492	0.261778		0.072	0.0798	0.100981		At4g33080	protein kinase, putative contains protein kinase domain, Pfam:PF00069
A013207_01	2.80535	0.5888	0.209884	1.47956	2.75256		A013207_01	At4g34830	0	0.093	-0.487	0.265	-0.113	-0.639	-0.248	-0.358	-0.751		-0.265	0.142	-0.044	0.168			0	-0.0484	0.281558		-0.498	-0.499	0.23522		0.049	0.00025	0.200457		At4g34830	pentatricopeptide (PPR) repeat-containing protein contains Pfam profile PF01535: PPR repeat
A013212_01	2.46778	0.315	0.127645	1.23947	5.37887		A013212_01	At4g15490	0	0.297	-0.438	0.774	-0.052	-0.2	-0.007	0.004	0.247	-0.21	0.459	0.338	0.187	0.133	0.292		0	0.1162	0.451199		-0.007	-0.0332	0.186857		0.292	0.2818	0.128249		At4g15490	UDP-glucoronosyl/UDP-glucosyl transferase family protein contains Pfam profile: PF00201 UDP-glucoronosyl and UDP-glucosyl transferase ;simalr to UDP-glucose:sinapate glucosyltransferase GI:9794913 from [Brassica napus]
A013240_01	3.72526	0.7088	0.190269	1.60274	0.760034		A013240_01	At4g10920	-0.16	0.349	0.135	-0.592	0	0.559	0.682	0.628	0.036	-0.042	1.163	1.236	0.936	1.013	1.059		0	-0.0536	0.354163		0.559	0.3726	0.346733		1.059	1.0814	0.119249		At4g10920	transcriptional coactivator p15 (PC4) family protein (KELP) similar to SP|P53999 Activated RNA polymerase II transcriptional coactivator p15 (PC4) (p14) {Homo sapiens}; contains Pfam profile PF02229: Transcriptional Coactivator p15 (PC4); supporting cDNA
A013320_01	2.76534	0.7518	0.271865	1.64285	3.27795		A013320_01	At4g25700	0	-0.099	-1.011	0.121	0.19	-0.995	-1.217	-1.107	-0.663	-1.942	-0.18	-0.846	-0.545	-0.426	-0.168		0	-0.1598	0.488616		-1.107	-1.1848	0.471365		-0.426	-0.433	0.28169		At4g25700	beta-carotene hydroxylase identical to GI:1575296
A013351_01	6.56294	1.0484	0.159745	2.08169	0		A013351_01	At4g39190	-0.22	0.127	0.627	-0.127		0.655	0.452	0.621	0.396	0.244	1.597	1.888	1.28	1.312	1.533		0	0.10175	0.379638		0.452	0.4736	0.168699		1.533	1.522	0.246153		At4g39190	expressed protein ; expression supported by MPSS
A013363_01	3.25706	0.6012	0.184584	1.5116	1.47491		A013363_01	At4g13250	-0.003	0.291	-0.564	0.035	0	-0.096	-0.027	0.112	-0.114	-0.601	0.543	0.447	0.537	0.679	0.074		0	-0.0482	0.313207		-0.096	-0.1452	0.269848		0.537	0.456	0.229055		At4g13250	short-chain dehydrogenase/reductase (SDR) family protein contains INTERPRO family IPR002198 Short-chain dehydrogenase/reductase (SDR) superfamily
A013421_01	2.48268	0.3996	0.160955	1.30502	5.37887		A013421_01	At4g32520	0.006	0	-0.38	0.175	-0.05	-0.115	-0.134	-0.115	-0.198	-0.754	0.153	0.165	-0.03	0.095	0.299		0	-0.0498	0.2032		-0.134	-0.2632	0.276475		0.153	0.1364	0.119305		At4g32520	glycine hydroxymethyltransferase, putative / serine hydroxymethyltransferase, putative / serine/threonine aldolase, putative similar to serine hydroxymethyltransferase [Chlamydomonas reinhardtii] GI:17066746; contains Pfam profile PF00464: serine hydroxym
A013634_01	3.58665	0.2638	0.0735506	1.19938	1.02009		A013634_01	At4g36720	-0.06	0.191	0	-0.05	0.062	0.308	0.089	0.099	0.11	0.158	0.408	0.502	0.352	0.402	0.419		0	0.0286	0.102878		0.11	0.1528	0.0907067		0.408	0.4166	0.0542199		At4g36720	abscisic acid-responsive HVA22 family protein low similarity to SP|Q00765 Polyposis locus protein 1 (TB2 protein) {Homo sapiens}; contains Pfam profile PF03134: TB2/DP1, HVA22 family
A013662_01	2.59896	0.4574	0.175994	1.35567	4.47718		A013662_01	At4g33240	-0.121	0.002	0.376	0	-0.506	-0.228	-0.194	-0.131	-0.277	-0.879	0.253	0.071	0.168	0.188	-0.102		0	-0.0498	0.316092		-0.228	-0.3418	0.304965		0.168	0.1156	0.138026		At4g33240	phosphatidylinositol-4-phosphate 5-kinase family protein similar to SP|Q9Z1T6 FYVE finger-containing phosphoinositide kinase (EC 2.7.1.68) (1- phosphatidylinositol-4-phosphate kinase) (PIP5K) (PtdIns(4)P-5-kinase) {Mus musculus}; contains Pfam profiles PF
A013697_01	7.4406	1.6298	0.219042	3.06367	0		A013697_01	At4g15610	0.056	0	-0.448	0.406	-0.527	1.05	0.737	0.682	1.453	0.642	2.953	2.37	2.276	2.506	2.608		0	-0.1026	0.385283		0.737	0.9128	0.342106		2.506	2.5426	0.26216		At4g15610	integral membrane family protein contains TIGRFAM TIGR01569 : plant integral membrane protein TIGR01569; contains Pfam PF04535 : Domain of unknown function (DUF588)
A013721_01	2.57775	0.6576	0.255107	1.51327	4.47718		A013721_01	At4g39140	-0.229	0	-0.554	0.091	0.143	-0.396	-0.287	-0.283	-0.272	-1.44	0.132	0.139	0.199	0.108	0.032		0	-0.1098	0.286272		-0.287	-0.5356	0.508065		0.132	0.122	0.0604442		At4g39140	expressed protein
A013780_01	3.04622	0.5144	0.168865	1.40631	2.16718		A013780_01	At4g09760	0.049	0	-0.587	0.185	-0.007	0.067	0.532	0.7	0.133	0.044	0.785	0.793	0.767	0.991	0.712		0	-0.072	0.298045		0.133	0.2952	0.300592		0.785	0.8096	0.106216		At4g09760	choline kinase, putative similar to GmCK2p choline kinase gi|1438881|gb|AAC49375
A013805_01	3.48312	0.429	0.123165	1.34511	1.24313		A013805_01	At4g21980	0.068	-0.011	-0.151	0	0.03	0.025	-0.012	-0.01	-0.003	-0.363	0.25	0.572	0.206	0.369	0.385		0	-0.0128	0.0831066		-0.01	-0.0726	0.163013		0.369	0.3564	0.142654		At4g21980	autophagy 8a (APG8a) identical to autophagy 8a [Arabidopsis thaliana] GI:19912151; contains Pfam profile PF02991: Microtubule associated protein 1A/1B, light chain 3
A014042_01	2.706	0.4722	0.174501	1.37696	3.27795		A014042_01	At4g02990	0	0.061	-0.733	-0.098	0.59	-0.392	-0.265	-0.135	-0.409	-0.867	0.079	-0.098	0.118	-0.129	0.323		0	-0.036	0.472291		-0.392	-0.4136	0.276477		0.079	0.0586	0.182736		At4g02990	mitochondrial transcription termination factor family protein / mTERF family protein weak similarity to mtDBP protein [Paracentrotus lividus] GI:4584695; contains Pfam profile PF02536: mTERF
A014046_01	4.802	1.0844	0.225823	2.1325	0.21257		A014046_01	At4g25000	0.26	0.043	-0.747	-0.043		1.278	1.592	1.029	1.334	0.83	1.858	2.78	2.406	2.178	2.263		0	-0.12175	0.435896		1.278	1.2126	0.292853		2.263	2.297	0.336604		At4g25000	alpha-amylase, putative / 1,4-alpha-D-glucan glucanohydrolase, putative similar to alpha-amylase from Vigna mungo SP|P17859, Ipomoea nil GI:21670851; contains Pfam profile PF00128: Alpha amylase, catalytic domain
A014115_01	3.36836	0.6832	0.202829	1.57587	1.24313		A014115_01	At4g28040	0.053	-0.012	0.369	-0.089	0	-1.037	-0.689	-0.642	-1.544	-0.979	-0.194	-0.216	-0.517	-0.409	-0.139		0	0.0642	0.177783		-0.979	-0.9782	0.360643		-0.216	-0.295	0.160513		At4g28040	nodulin MtN21 family protein similar to MtN21 GI:2598575 (root nodule development) from [Medicago truncatula]
A014176_01	3.20283	0.3618	0.112962	1.28621	1.7537		A014176_01	At4g39100	-0.281	0.006	0.076	-0.021	0	-0.591	-0.39	-0.294	-0.567	-0.536	-0.238	-0.239	-0.167	-0.012	0.087		0	-0.044	0.137417		-0.536	-0.4756	0.128087		-0.167	-0.1138	0.145443		At4g39100	PHD finger family protein / bromo-adjacent homology (BAH) domain-containing protein contains Pfam domain, PF00628: PHD-finger and PF01426: BAH domain
A014179_01	3.87205	0.4044	0.104441	1.32227	0.534461		A014179_01	At4g24680		-0.092	0.542	0		-0.007	-0.186	-0.102	0.115	0.118	0.529	0.497	0.311	0.285	0.338		0	0.15	0.342584		-0.007	-0.0124	0.133631		0.338	0.392	0.112606		At4g24680	expressed protein
A014180_01	6.27921	0.9788	0.155879	1.97871	0		A014180_01	At4g38540	0	0.462	-0.875	1.113	-0.244	1.086	1.242	1.246	1.481	1.031	2.379	2.374	1.921	1.968	2.338		0	0.0912	0.747627		1.242	1.2172	0.175299		2.338	2.196	0.23073		At4g38540	monooxygenase, putative (MO2) identical to GI:3426064
A014239_01	2.93403	0.342	0.116563	1.25971	2.16718		A014239_01	At4g25910	-0.22	0.164	-0.082	0	0.116	-0.426	-0.435	-0.535	-0.848	-0.754	-0.229	-0.315	-0.328	-0.176	-0.24		0	-0.0044	0.154418		-0.535	-0.5996	0.191667		-0.24	-0.2576	0.063319		At4g25910	nitrogen fixation protein, putative nitrogen fixation protein nifU (SP:Q43885) [Anabaena sp.]; contains Pfam profile: PF01106 NifU-like domain
A014304_01	3.1959	0.5662	0.177165	1.51095	1.7537		A014304_01	At4g29110	-0.188	0.293	-0.395	0.308	0	-0.168	-0.109	-0.016	-0.249	-0.219	0.316	0.978	0.22	0.182	0.374		0	0.0036	0.304966		-0.168	-0.1522	0.0928693		0.316	0.414	0.32433		At4g29110	hypothetical protein
A014430_01	3.00515	0.348	0.115801	1.26984	2.16718		A014430_01	At4g02210	-0.243	0	0.287	-0.307	0.119	-0.537	-0.403	-0.351	-0.339	-0.093	-0.1	-0.103	0.188	0.012	0.02		0	-0.0288	0.247831		-0.351	-0.3446	0.161093		0.012	0.0034	0.118785		At4g02210	expressed protein
A014438_01	3.48621	0.7714	0.221272	1.66594	1.24313		A014438_01	At4g12290		0.238	-0.318	0.645	-0.238	0.142	0.249	0.385	0.474	-0.554	0.785	1.104	0.96	0.98	0.724		0	0.08175	0.448592		0.249	0.1392	0.407768		0.96	0.9106	0.154317		At4g12290	copper amine oxidase, putative similar to copper amine oxidase [Cicer arietinum] gi|3819099|emb|CAA08855
A014534_01	2.5734	0.4268	0.16585	1.33788	4.47718		A014534_01	At4g34000	-0.105	0	0.044	0.303	-0.042	-0.487	-0.521	-0.546	-0.967	-0.969	-0.275	-0.262	-0.577	-0.176	-0.066		0	0.04	0.156951		-0.546	-0.698	0.247364		-0.262	-0.2712	0.190252		At4g34000	ABA-responsive element-binding protein / abscisic acid responsive elements-binding factor (ABRE) / ABA-responsive elements-binding factor (ABF3) identical to abscisic acid responsive elements-binding factor (ABF3) GI:6739280 from [Arabidopsis thaliana]; i
A014596_01	4.71377	0.5402	0.1146	1.46315	0.21257		A014596_01	At4g19410	-0.093	0.101	0	-0.014	0.03	-0.006	0.092	-0.035	0.087	-0.032	0.636	0.454	0.395	0.467	0.855		0	0.0048	0.0704109		-0.006	0.0212	0.0633853		0.467	0.5614	0.187017		At4g19410	pectinacetylesterase, putative similar to pectinacetylesterase precursor GI:1431629 from [Vigna radiata]
A014699_01	3.93235	0.3626	0.0922096	1.28147	0.534461		A014699_01	At4g33090	0	-0.189	-0.075	0.515	0.011	-0.101	-0.121	-0.031	-0.214	-0.395	0.144	0.236	0.217	0.213	0.141		0	0.0524	0.27063		-0.121	-0.1724	0.140548		0.213	0.1902	0.0444151		At4g33090	aminopeptidase M similar to SP|Q11011 Puromycin-sensitive aminopeptidase (EC 3.4.11.-) (PSA) {Mus musculus}; contains Pfam profile PF01433: Peptidase family M1
A014707_01	2.58987	0.6156	0.237695	1.47726	4.47718		A014707_01	At4g15780	-0.151	0.231	-0.195	0	0.173	-0.164	-0.022	0.035	-0.434	-1.107	0.39	0.325	0.223	0.238	0.21		0	0.0116	0.189369		-0.164	-0.3384	0.466325		0.238	0.2772	0.0774577		At4g15780	synaptobrevin-related family protein similar to Vesicle-associated membrane protein 722 (AtVAMP722) Synaptobrevin-related protein 1 (SP:P47192) {Arabidopsis thaliana}
A014798_01	2.4645	0.4294	0.174234	1.34572	5.37887		A014798_01	At4g14430	-0.11	0	-1.004	0.181	0.295	0.054	-0.055	0.231	0.334	-0.273	0.646	0.455	0.332	0.221	0.784		0	-0.1276	0.514415		0.054	0.0582	0.238983		0.455	0.4876	0.228743		At4g14430	enoyl-CoA hydratase/isomerase family protein low siimilarity to 2-cyclohexenylcarbonyl CoA isomerase [Streptomyces collinus] GI:8133118, enoyl-CoA isomerase [Escherichia coli] GI:2764829; contains Pfam profile PF00378 enoyl-CoA hydratase/isomerase family
A014919_01	2.47212	0.4496	0.181868	1.35033	5.37887		A014919_01	At4g38060	0.107	0.42	-0.3	-0.046	0	-0.603	-0.246	-0.366	-0.487	-1.037	-0.094	-0.052	-0.204	0.152	-0.293		0	0.0362	0.261444		-0.487	-0.5478	0.304218		-0.094	-0.0982	0.16874		At4g38060	expressed protein
A014928_01	3.35207	1.17956	0.35189	2.04863	1.47491		A014928_01	At4g03320	0.001	-0.267	-0.001	0.147		0.26	-0.194	-0.436	0.271		1.71	1.508	1.3	1.296	1.389		0	-0.03	0.17253		0.033	-0.02475	0.349439		1.389	1.4406	0.173536		At4g03320	chloroplast protein import component-related similar to P. sativum Tic20 chloroplast protein import component (GI:3769673)
A015257_01	2.88716	0.355	0.122958	1.27	2.75256		A015257_01	At4g34450	0	0.109	-0.153	0.566	-0.045	0.205	0.222	0.205	0.199	-0.256	0.397	0.451	0.456	0.484	0.562		0	0.0954	0.279359		0.205	0.115	0.207573		0.456	0.47	0.0603034		At4g34450	coatomer gamma-2 subunit, putative / gamma-2 coat protein, putative / gamma-2 COP, putative similar to SP|Q9UBF2 Coatomer gamma-2 subunit (Gamma-2 coat protein) (Gamma-2 COP) {Homo sapiens}; contains Pfam profile: PF01602 Adaptin N terminal region
A015279_01	4.23296	0.7606	0.179685	1.67655	0.527996		A015279_01	At4g16690	-0.195	0.095	-0.666	0	0.102	-0.052	0.033	-0.119	-0.219	-0.726	0.588	0.368	0.512	0.446	0.806		0	-0.1328	0.32126		-0.119	-0.2166	0.299338		0.512	0.544	0.167469		At4g16690	esterase/lipase/thioesterase family protein similar to ethylene-induced esterase [Citrus sinensis] GI:14279437, polyneuridine aldehyde esterase [Rauvolfia serpentina] GI:6651393, SP|Q40708 PIR7A protein {Oryza sativa}; contains Interpro entry IPR000379
A015330_01	4.5585	0.7244	0.158912	1.65185	0.21257		A015330_01	At4g33540	0.134	0	-0.79	0.219	-0.031	0.443	0.354	0.189	0.668	0.138	1.129	0.992	0.953	0.916	1.424		0	-0.0936	0.402235		0.354	0.3584	0.212309		0.992	1.0828	0.207043		At4g33540	metallo-beta-lactamase family protein
A015404_01	3.98649	0.3822	0.0958737	1.29906	0.534461		A015404_01	At4g27000	-0.32	-0.063	0.334	0.224	0	0.181	0.194	0.189	-0.096	0.288	0.578	0.453	0.567	0.494	0.575		0	0.035	0.255918		0.189	0.1512	0.144889		0.567	0.5334	0.0567124		At4g27000	RNA-binding protein 45 (RBP45), putative DNA binding protein ACBF - Nicotiana tabacum, PID:g1899188
A015433_01	2.60396	0.814	0.312601	1.66345	4.47718		A015433_01	At4g36670	0.123	-0.325	-1.373	0.082	0	0.509	0.713	1.026	1.13	-0.401	1.56	1.299	1.225	1.288	1.675		0	-0.2986	0.625859		0.713	0.5954	0.609369		1.299	1.4094	0.196312		At4g36670	mannitol transporter, putative similar to mannitol transporter [Apium graveolens var. dulce] GI:12004316; contains Pfam profile PF00083: major facilitator superfamily protein
A015457_01	2.905	0.1786	0.0614802	1.13184	2.75256		A015457_01	At4g33630	0.116	0	-0.369	-0.031	0.018	-0.353	-0.33	-0.311	-0.395	-0.447	-0.22	-0.183	-0.115	-0.264	-0.161		0	-0.0532	0.184899		-0.353	-0.3672	0.0545087		-0.183	-0.1886	0.0567477		At4g33630	expressed protein
A015504_01	2.45042	0.7876	0.321414	1.63711	5.37887		A015504_01	At5g11090	-0.219	0.022	-0.724	0.183	0	-0.312	-0.076	-0.248	-0.359	-1.623	0.577	0.312	0.132	0.006	0.293		0	-0.1476	0.352555		-0.312	-0.5236	0.623869		0.293	0.264	0.215117		At5g11090	serine-rich protein-related contains some similarity to serine-rich proteins
A015540_01	3.82042	0.6726	0.176054	1.58734	0.760034		A015540_01	At5g53730	-0.289	0.077	0	0.084	-0.02	0.605	0.838	0.746	0.5	1.171	1.524	1.333	1.354	1.234	1.778		0	-0.0296	0.15209		0.746	0.772	0.257927		1.354	1.4446	0.213586		At5g53730	harpin-induced family protein / HIN1 family protein / harpin-responsive family protein similar to harpin-induced protein hin1 ( GI:1619321) [Nicotiana tabacum];
A015573_01	2.9828	0.6988	0.234277	1.56888	2.16718		A015573_01	At5g07950	0	0.078	-0.276	0.01	-0.296	0.139	0.19	-0.124	-0.388	-0.913	0.428	0.659	0.383	0.518	0.41		0	-0.0968	0.175446		-0.124	-0.2192	0.451294		0.428	0.4796	0.112358		At5g07950	expressed protein ferredoxin (2Fe-2S), Arabidopsis thaliana, PIR:B71412
A015678_01	3.26146	0.2712	0.083153	1.20799	1.47491		A015678_01	At5g10070	0.121	0.188	-0.392	-0.054	0	-0.018	-0.021	-0.125	-0.002	-0.167	0.255	0.213	0.168	0.332	0.055		0	-0.0274	0.225173		-0.021	-0.0666	0.0743391		0.213	0.2046	0.103152		At5g10070	RNase L inhibitor protein-related contains Pfam profiles PF04034: Domain of unknown function (DUF367), PF04068: Possible metal-binding domain in RNase L inhibitor, RLI
A015776_01	2.53675	0.407	0.160442	1.30634	4.47718		A015776_01	At5g41350	-0.137	0.022	-0.492	0	0.104	-0.114	-0.016	0.095	0.238	-0.535	0.371	0.3	0.25	0.369	0.413		0	-0.1006	0.235336		-0.016	-0.0664	0.292874		0.369	0.3406	0.0648637		At5g41350	zinc finger (C3HC4-type RING finger) family protein contains Pfam profile: PF00097 zinc finger, C3HC4 type (RING finger)
A015805_01	3.08376	0.3558	0.115379	1.27585	1.7537		A015805_01	At5g52820	-0.019	0.192	0.642	0	-0.132	0.3	0.105	-0.051	0.146	0.37	0.514	0.623	0.569	0.596	0.347		0	0.1366	0.305579		0.146	0.174	0.166179		0.569	0.5298	0.109853		At5g52820	WD-40 repeat family protein / notchless protein, putative similar to notchless [Xenopus laevis] GI:3687833; contains Pfam PF00400: WD domain, G-beta repeat (8 copies)
A015870_01	2.77111	0.5764	0.208003	1.45977	3.27795		A015870_01	At5g03470	-0.221	0	0.367	0.256	-0.144	-0.156	0.273	0.348	-0.136	0.73	0.783	0.641	0.944	0.97	0.603		0	0.0516	0.253224		0.273	0.2118	0.36982		0.783	0.7882	0.168314		At5g03470	serine/threonine protein phosphatase 2A (PP2A) regulatory subunit B' (B'alpha) similar to SWISS-PROT:Q28653 serine/threonine protein phosphatase 2A, 56 kDa regulatory subunit, delta isoform (PP2A, B subunit, B' delta isoform, PP2A, B subunit, B56 delta is
A016052_01	2.84948	0.3574	0.125426	1.28671	2.75256		A016052_01	At5g52040	-0.135	0	-0.511	0.311	0.185	-0.243	0.026	-0.128	-0.052	-0.234	0.366	0.1	0.154	0.046	0.49		0	-0.03	0.318509		-0.128	-0.1262	0.116121		0.154	0.2312	0.188826		At5g52040	arginine/serine-rich splicing factor RSP41 (RSP41) nearly identical to SP|P92966 Arginine/serine-rich splicing factor RSP41 {Arabidopsis thaliana}
A016193_01	3.06758	1.3432	0.43787	2.26953	1.7537		A016193_01	At5g01600	0.376	0.258	-0.626	0	-0.012	0.642	0.256	-0.347	-0.345	-1.662	0.856	0.976	1.493	1.167	0.768		0	-0.0008	0.387284		-0.345	-0.2912	0.873984		0.976	1.052	0.288337		At5g01600	ferritin 1 (FER1) identical to ferritin [Arabidopsis thaliana] GI:1246401, GI:8163920
A016197_01	3.11976	0.2406	0.0771214	1.17934	1.7537		A016197_01	At5g44200	-0.076	0	0.296	-0.09	0.163	0.023	0.021	-0.041	-0.234	-0.094	0.194	0.213	0.207	0.128	0.136		0	0.0586	0.166502		-0.041	-0.065	0.106205		0.194	0.1756	0.0404883		At5g44200	nuclear cap-binding protein, putative similar to SP|P52298 20 kDa nuclear cap binding protein (CBP20) (NCBP interacting protein 1) {Homo sapiens}; non-consensus AT donor splice site at exon 4, AC acceptor splice site at exon 5; contains InterPro entry IPR
A016210_01	2.6614	0.6568	0.246787	1.52823	4.47718		A016210_01	At5g14780	-0.252	0	-0.688	0.291	0.033	-0.402	-0.394	-0.054	-0.515	-1.296	0.352	0.161	-0.104	0.012	0.202		0	-0.1232	0.369705		-0.402	-0.5322	0.460547		0.161	0.1246	0.176042		At5g14780	formate dehydrogenase (FDH) identical to GI:7677266
A016226_01	3.24736	0.495	0.152432	1.39589	1.47491		A016226_01	At5g01820	-0.055	0.442	-0.589	0.739	0	-0.313	-0.148	-0.311	-0.435	-0.831	-0.014	0.247	0.022	0.17	0.012		0	0.1074	0.508369		-0.313	-0.4076	0.257726		0.022	0.0874	0.114607		At5g01820	CBL-interacting protein kinase 14 (CIPK14) identical to CBL-interacting protein kinase 14 [Arabidopsis thaliana] gi|13249127|gb|AAK16689; contains Pfam profiles PF00069: Protein kinase domain and PF03822: NAF domain; identical to cDNA CBL-interacting prot
A016324_01	5.60647	0.8572	0.152895	1.82418	0		A016324_01	At5g39610	-0.245	0.099	-0.53	0	0.167	-1.037	-0.976	-0.849	-0.842	-1.218	-0.282	-0.181	-0.28	-0.18	0.287		0	-0.1018	0.285832		-0.976	-0.9844	0.154933		-0.181	-0.1272	0.236936		At5g39610	no apical meristem (NAM) family protein contains Pfam PF02365 : No apical meristem (NAM) protein; similar to cup-shaped cotyledon CUC2 (GI:1944132) [Arabidopsis thaliana]
A016351_01	2.5726	0.3152	0.122522	1.24532	4.47718		A016351_01	At5g47180	-0.291	-0.142	0.009	0	0.171	-0.199	-0.151	-0.386	-0.483	-0.193	0.141	0.096	-0.17	-0.101	0.198		0	-0.0506	0.174188		-0.199	-0.2824	0.144211		0.096	0.0328	0.159705		At5g47180	vesicle-associated membrane family protein / VAMP family protein similar to VAP27 GI:6688926 [Nicotiana plumbaginifolia], to VAMP-associated protein B GI:4240464 [Rattus norvegicus] and to Vesicle-associated membrane protein/synaptobrevin binding protein
A016404_01	2.51952	0.437	0.173446	1.33556	4.47718		A016404_01	At5g24320	-0.032	0	-0.871	0.45	0.043	-0.389	-0.266	-0.079	-0.485	-0.888	0.023	-0.045	0.15	0.123	-0.173		0	-0.082	0.482285		-0.389	-0.4214	0.301744		0.023	0.0156	0.131239		At5g24320	WD-40 repeat family protein contains Pfam PF00400: WD domain, G-beta repeat; similar to WD-repeat protein 5 (WD repeat protein BIG-3) (SP: Q9UGP9) [Homo sapiens]
A016406_01	2.45608	0.9638	0.392414	1.78781	5.37887		A016406_01	At5g59540	0.049	-0.042	-1.079	0.11	0	-0.59	-0.479	-0.401	-0.429	-2.246	0.379	0.183	0.008	0.223	-0.119		0	-0.1924	0.498853		-0.479	-0.829	0.795408		0.183	0.1348	0.193797		At5g59540	oxidoreductase, 2OG-Fe(II) oxygenase family protein similar to desacetoxyvindoline-4-hydroxylase [Catharanthus roseus] GI:2352812; contains Pfam profile PF03171: oxidoreductase, 2OG-Fe(II) oxygenase family
A016483_01	3.31638	0.4496	0.13557	1.36764	1.47491		A016483_01	At5g59950	-0.346	0	-0.847	0.216	0.13	-0.08	-0.077	-0.16	-0.063	-0.45	0.338	0.324	0.042	0.186	0.528		0	-0.1694	0.435086		-0.08	-0.166	0.163262		0.324	0.2836	0.18181		At5g59950	RNA and export factor-binding protein, putative
A016516_01	3.07775	0.4504	0.146341	1.35333	1.7537		A016516_01	At5g47690	0	-0.114	0.345	0.083	-0.551	-0.063	0.081	0.36	0.015	-0.324	0.433	0.349	0.513	0.619	0.407		0	-0.0474	0.328358		0.015	0.0138	0.247173		0.433	0.4642	0.104715		At5g47690	expressed protein
A016540_01	3.03002	0.2756	0.0909566	1.21183	2.16718		A016540_01	At5g06450	-0.117	0.106	-0.425	0	0.117	0.197	0.253	0.148	0.172	0.366	0.515	0.581	0.372	0.402	0.644		0	-0.0638	0.222984		0.197	0.2272	0.0868372		0.515	0.5028	0.115619		At5g06450	expressed protein
A016545_01	2.52962	0.3831	0.151446	1.2901	4.47718		A016545_01	At5g52660	-0.073	0.111	-0.193	0.01	0	-0.391	0.015	-0.064	-0.436		0.28	0.278	0.058	0.262	0.321		0	-0.029	0.112688		-0.227	-0.219	0.227636		0.278	0.2398	0.103938		At5g52660	myb family transcription factor contains PFAM profile: PF00249 myb-like DNA-binding domain
A016586_01	4.22412	0.8982	0.212636	1.82658	0.527996		A016586_01	At5g06370	-0.098	0.085	-1.109	0	0.112	0.27	0.124	0.115	-0.046	-0.701	0.913	0.947	0.662	0.69	1.041		0	-0.202	0.513623		0.115	-0.0476	0.381998		0.913	0.8506	0.166434		At5g06370	NC domain-containing protein contains Pfam domain, PF04970: NC domain
A016697_01	3.30486	0.3582	0.108386	1.28441	1.47491		A016697_01	At5g02830	-0.003	-0.194	0.214	0.05	0	-0.926	-0.897	-1.098	-1.111	-0.901	-0.671	-0.699	-0.43	-0.533	-0.809		0	0.0134	0.145811		-0.926	-0.9866	0.108297		-0.671	-0.6284	0.148222		At5g02830	pentatricopeptide (PPR) repeat-containing protein contains Pfam profile PF01535: PPR repeat
A016826_01	2.68276	0.6114	0.2279	1.49765	3.27795		A016826_01	At5g03230	-0.022	0.218	-0.482	0.606	0	-0.419	-0.16	-0.057	-0.884	-0.895	-0.044	0.449	-0.101	0.124	0.214		0	0.064	0.395944		-0.419	-0.483	0.393842		0.124	0.1284	0.219361		At5g03230	expressed protein contains Pfam profile PF04520: Protein of unknown function, DUF584
A016937_01	3.06111	0.7262	0.237234	1.62747	2.16718		A016937_01	At5g64570	0	-0.033	-0.746	0.566	0.207	-0.548	-0.341	-0.281	-0.323	-1.244	0.515	-0.148	0.06	0.213	0.254		0	-0.0012	0.479792		-0.341	-0.5474	0.402858		0.213	0.1788	0.24534		At5g64570	glycosyl hydrolase family 3 protein
A016946_01	2.7851	0.3764	0.135148	1.29964	3.27795		A016946_01	At5g11520	-0.114	-0.016	0.241	0	0.186	-0.036	-0.231	0.184	0.091	-0.095	0.536	0.071	0.302	0.42	0.466		0	0.0594	0.148566		-0.036	-0.0174	0.161482		0.42	0.359	0.182135		At5g11520	aspartate aminotransferase, chloroplast / transaminase A (ASP3) (YLS4) identical to SP|P46644 Aspartate aminotransferase, chloroplast precursor (EC 2.6.1.1) (Transaminase A) {Arabidopsis thaliana}; identical to cDNA YLS4 mRNA for aspartate aminotransferas
A016955_01	2.81269	0.277	0.0984822	1.21	2.75256		A016955_01	At5g38895	-0.051	0	0.072	-0.085	0.258	0.02	0.131	0.35	0.117	0.255	0.407	0.537	0.344	0.399	0.571		0	0.0388	0.136058		0.131	0.1746	0.128792		0.407	0.4516	0.097318		At5g38895	zinc finger (C3HC4-type RING finger) family protein contains Pfam profile: PF00097 zinc finger, C3HC4 type (RING finger)
A016960_01	2.4468	0.44725	0.18279	1.35091	5.37887		A016960_01	At5g02880		-0.408	-0.151	0.151	1.929	-0.225	-0.213	-0.473	-0.277		0.082	0.225	-0.184	-0.154	0.161		0	0.38025	1.05747		-0.251	-0.297	0.120576		0.082	0.026	0.185379		At5g02880	HECT-domain-containing protein / ubiquitin-transferase family protein / armadillo/beta-catenin-like repeat-containing protein similar to SP|Q14669 Thyroid receptor interacting protein 12 (TRIP12) {Homo sapiens}; contains Pfam profiles PF00632: HECT-domain
A016971_01	6.53009	1.2722	0.194821	2.37098	0		A016971_01	At5g39520	0.572	0	-1.567	0.476	-0.771	-0.013	0.482	0.536	0.096	-0.286	1.574	1.446	1.451	1.521	1.184		0	-0.258	0.904277		0.096	0.163	0.345672		1.451	1.4352	0.150079		At5g39520	expressed protein predicted protein, Synechocystis sp., PIR:S77152
A016980_01	2.66437	0.3948	0.148178	1.32055	3.27795		A016980_01	At5g55700		0.111	-0.507	-0.111	0.183	0.042	0.317	0.006	0.156	-0.104	0.688	0.363	0.222	0.388	0.73		0	-0.081	0.310342		0.042	0.0834	0.160205		0.388	0.4782	0.220491		At5g55700	glycosyl hydrolase family 14 protein similar to beta-amylase enzyme GI:6065749 from [Arabidopsis thaliana]; contains Pfam profile PF01373: Glycosyl hydrolase family 14
A017013_01	3.0922	0.3826	0.123731	1.30857	1.7537		A017013_01	At5g55530	-0.203	0.011	0.161	-0.148	0	0.33	0.417	0.15	0.459	0.366	0.962	0.735	0.526	0.571	0.841		0	-0.0358	0.143829		0.366	0.3444	0.119236		0.735	0.727	0.182361		At5g55530	C2 domain-containing protein low similarity to cold-regulated gene SRC2 [Glycine max] GI:2055230; contains Pfam profile PF00168: C2 domain
A017066_01	4.82242	0.4216	0.087425	1.33951	0.21257		A017066_01	At5g35330	-0.057	0.222	0	-0.101	0.092	0.022	0.136	0.213	-0.008	0.01	0.526	0.466	0.399	0.44	0.65		0	0.0312	0.128774		0.022	0.0746	0.0957695		0.466	0.4962	0.0975459		At5g35330	methyl-CpG-binding domain-containing protein similar to methyl-CpG binding protein MBD4 [Mus musculus] GI:3800807; contains Pfam profile PF01429: Methyl-CpG binding domain
A017194_01	2.4498	0.4536	0.185158	1.35471	5.37887		A017194_01	At5g02710	0.104	0	-0.015	-0.196	0.315	-0.22	-0.039	-0.269	-0.626	-0.776	0.039	0.055	-0.03	-0.101	0.375		0	0.0416	0.187102		-0.269	-0.386	0.304694		0.039	0.0676	0.182636		At5g02710	expressed protein contains Pfam PF03692: Uncharacterised protein family (UPF0153)
A017227_01	2.60744	0.4994	0.191529	1.42049	4.47718		A017227_01	At5g06360	-0.272	0.062	0.071	-0.057	0	0.408	0.229	-0.216	0.07	-0.001	0.815	0.563	0.244	0.422	0.943		0	-0.0392	0.140031		0.07	0.098	0.235819		0.563	0.5974	0.284442		At5g06360	ribosomal protein S8e family protein contains Pfam profile PF01201: Ribosomal protein S8e
A017277_01	2.69142	0.6146	0.228355	1.48734	3.27795		A017277_01	At5g17860	-0.021	0.304	0	0.172	-0.464	-0.127	0.188	0.569	0.681	-0.287	0.841	0.895	0.977	0.836	0.548		0	-0.0018	0.290569		0.188	0.2048	0.421796		0.841	0.8194	0.161982		At5g17860	cation exchanger, putative (CAX7) contains similarity to SWISS-PROT:Q9HC58 NKX3_HUMAN Sodium/potassium/calcium exchanger 3 precursor {Homo sapiens}; Ca2+:Cation Antiporter (CaCA) Family member PMID:11500563
A017284_01	3.6314	0.6404	0.176351	1.53151	1.02009		A017284_01	At5g40690	0	0.342	-0.357	-0.353	0.541	-0.209	-0.328	0.04	0.418	-0.321	0.416	0.527	0.716	0.623	0.52		0	0.0346	0.404882		-0.209	-0.08	0.315686		0.527	0.5604	0.11372		At5g40690	expressed protein
A017311_01	3.10402	1.123	0.361788	2.03238	1.7537		A017311_01	At5g13330	0.508	0	0.622	-0.002	-0.662	1.443	1.128	-0.336	1.082	0.517	2.089	1.802	1.721	1.596	2.241		0	0.0932	0.509844		1.082	0.7668	0.701005		1.802	1.8898	0.267181		At5g13330	AP2 domain-containing transcription factor family protein similar to AP2 domain containing protein RAP2.6, Arabidopsis thaliana, EMBL:AF003099; contains Pfam profile PF00847: AP2 domain
A017384_01	3.64996	0.29012	0.0794857	1.22267	1.02009		A017384_01	At5g37055	0.035	-0.035	-0.054		0.212	0.196	0.343	0.119	0.25		0.58	0.382	0.493	0.492	0.588		0	0.0395	0.121201		0.223	0.227	0.0941807		0.493	0.507	0.0835703		At5g37055	zinc finger (HIT type) family protein contains Pfam profile: PF04438 HIT zinc finger
A017527_01	2.52229	0.4776	0.189352	1.4226	4.47718		A017527_01	At5g64430	-0.324	0	-0.374	0.498	0.276	-0.112	0.026	-0.154	-0.269	-0.096	0.41	0.474	-0.061	0.116	0.844		0	0.0152	0.376788		-0.112	-0.121	0.106428		0.41	0.3566	0.348737		At5g64430	octicosapeptide/Phox/Bem1p (PB1) domain-containing protein contains Pfam profile PF00564: PB1 domain
A017542_01	3.48601	0.3568	0.102352	1.28142	1.24313		A017542_01	At5g53460	-0.06	0.189	0	0.593	-0.331	0.328	0.471	0.574	0.302	0.464	0.81	0.578	0.819	0.787	0.929		0	0.0782	0.342766		0.464	0.4278	0.112179		0.81	0.7846	0.127837		At5g53460	glutamate synthase [NADH], chloroplast, putative similar to SP|Q03460 Glutamate synthase [NADH], chloroplast precursor (EC 1.4.1.14) (NADH- GOGAT) {Medicago sativa}
A017595_01	2.94233	0.4232	0.143831	1.32682	2.16718		A017595_01	At5g01880	-0.296	0.004	-0.539	0	0.142	-1.019	-0.69	-0.583	-1.204	-0.897	-0.568	-0.473	-0.466	-0.432	-0.338		0	-0.1378	0.275396		-0.897	-0.8786	0.249442		-0.466	-0.4554	0.0828118		At5g01880	zinc finger (C3HC4-type RING finger) family protein contains Pfam domain, PF00097: Zinc finger, C3HC4 type (RING finger)
A017612_01	3.03536	0.7122	0.234635	1.64557	2.16718		A017612_01	At5g57550	0.111	-0.573	0	-0.788	0.403	-0.154	0.274	-0.385	0.3	0.288	0.399	0.493	1.248	0.925	0.819		0	-0.1694	0.495106		0.274	0.0646	0.31587		0.819	0.7768	0.342436		At5g57550	xyloglucan:xyloglucosyl transferase / xyloglucan endotransglycosylase / endo-xyloglucan transferase (XTR3) identical to endoxyloglucan transferase GI:5533317 from [Arabidopsis thaliana]
A017703_01	3.12151	0.2976	0.0953385	1.22432	1.7537		A017703_01	At5g50230	-0.217	-0.275	0.098	0	0.025	-0.316	-0.185	-0.22	-0.155	-0.525	0.007	0.052	-0.041	0.05	0.019		0	-0.0738	0.162566		-0.22	-0.2802	0.149642		0.019	0.0174	0.0380171		At5g50230	transducin family protein / WD-40 repeat family protein contains 7 WD-40 repeats (PF00400); similar to TIPD PROTEIN (SP:O15736)[Dictyostelium discoideum]
A017717_01	2.44605	0.7332	0.299749	1.75266	5.37887		A017717_01	At5g47610		-0.072	0.027	-0.027	1.327	-1.059	-0.783	-0.834	-1.401		-0.364	-0.153	-0.791	-0.603	0.643		0	0.31375	0.676711		-0.947	-1.01925	0.281333		-0.364	-0.2536	0.55612		At5g47610	zinc finger (C3HC4-type RING finger) family protein contains Pfam profile: PF00097 zinc finger, C3HC4 type (RING finger)
A017735_01	2.87052	0.2962	0.103187	1.23133	2.75256		A017735_01	At5g05000	-0.141	0.089	-0.56	0.161	0	0.504	0.412	0.487	0.293	0.483	0.742	0.663	0.937	0.782	0.536		0	-0.0902	0.285763		0.483	0.4358	0.0872622		0.742	0.732	0.148157		At5g05000	translocate of chloroplast 34 (TOC34) / GTP-binding protein (OEP34) contains Pfam PF04548: AIG1 family;contains TIGRFAM TIGR00991: GTP-binding protein and TIGR00231: small GTP-binding protein domain; 99.7% identical to atToc34 protein (GI:11557975) [Arabi
A017767_01	3.22965	1.174	0.363507	2.10402	1.47491		A017767_01	At5g13080	0.283	-0.494	0.826	-0.283		1.124	0.716	0.537	1.64	2.181	2.321	2.703	2.726	2.411	1.907		0	0.083	0.59412		1.124	1.2396	0.675966		2.411	2.4136	0.33413		At5g13080	WRKY family transcription factor WRKY DNA binding protein - Solanum tuberosum, EMBL:AJ278507
A017857_01	2.91237	0.43972	0.150984	1.35358	2.16718		A017857_01	At5g16610		-0.076	-0.399	0.076	0.774	-0.496	-0.262	-0.358	-0.453		0.158	-0.261	-0.092	0.137	-0.134		0	0.09375	0.494865		-0.405	-0.39225	0.104232		-0.092	-0.0384	0.180901		At5g16610	expressed protein
A017934_01	2.6901	0.2562	0.0952381	1.19245	3.27795		A017934_01	At5g47880	-0.126	0	-0.385	0.254	0.005	-0.067	-0.122	-0.183	0.043	0.129	0.059	0.231	0.26	0.268	0.263		0	-0.0504	0.232347		-0.067	-0.04	0.125849		0.26	0.2162	0.0890545		At5g47880	eukaryotic peptide chain release factor subunit 1-1 (ERF1-1) identical to SP|Q39097 Eukaryotic peptide chain release factor subunit 1-1 (eRF1-1) (Eukaryotic release factor 1-1) (Omnipotent suppressor protein 1 homolog 1) (SUP1 homolog 1) {Arabidopsis thal
A017975_01	3.0457	0.4806	0.157796	1.39977	2.16718		A017975_01	At5g49980	-0.064	0.141	-0.144	0.42	0	0.141	0.315	0.213	0.122	-0.191	0.875	0.419	0.407	0.491	0.811		0	0.0706	0.221467		0.141	0.12	0.189631		0.491	0.6006	0.224742		At5g49980	transport inhibitor response protein, putative E3 ubiquitin ligase SCF complex F-box subunit; similar to F-box containing protein TIR1 GI:13249030 from [Populus tremula x Populus tremuloides]
A017977_01	4.42039	0.608	0.137544	1.52111	0.21257		A017977_01	At5g01520	-0.208	0	-0.051	0.039	0.318	-0.756	-0.537	-0.246	-0.62	-0.48	-0.032	-0.15	0.213	0.183	0.187		0	0.0196	0.191435		-0.537	-0.5278	0.188651		0.183	0.0802	0.162166		At5g01520	zinc finger (C3HC4-type RING finger) family protein similar to MTD2 [Medicago truncatula] GI:9294812; contains Pfam profile PF00097: Zinc finger, C3HC4 type (RING finger)
A018068_01	2.59749	0.43	0.165544	1.33386	4.47718		A018068_01	At5g65110	0	0.072	0.246	-0.006	-0.097	-0.367	-0.159	0.054	-0.211	-0.685	0.207	0.015	0.172	0.367	0.021		0	0.043	0.128355		-0.211	-0.2736	0.274931		0.172	0.1564	0.146188		At5g65110	acyl-CoA oxidase (ACX2) identical to acyl-CoA oxidase [Arabidopsis thaliana] GI:3044212
A018159_01	2.45202	0.7252	0.295756	1.59589	5.37887		A018159_01	At5g24160	0	0.017	-0.932	0.085	-0.219	-0.2	-0.008	0.039	-0.075	-1.258	0.096	0.623	0.632	0.587	0.186		0	-0.2098	0.419529		-0.075	-0.3004	0.542811		0.587	0.4248	0.261562		At5g24160	squalene monooxygenase 1,2 / squalene epoxidase 1,2 (SQP1,2) identical to SP|O65402
A018239_01	2.90295	0.476	0.163971	1.37233	2.75256		A018239_01	At5g11950	0	0.004	-0.311	-0.075	0.192	-0.31	-0.598	-0.408	-0.279	-0.987	-0.05	0.054	0.066	-0.107	-0.165		0	-0.038	0.181663		-0.408	-0.5164	0.291047		-0.05	-0.0404	0.100356		At5g11950	expressed protein contains Pfam profile PF03641: decarboxylase family protein
A018250_01	2.8573	0.522	0.18269	1.41775	2.75256		A018250_01	At5g42420		-0.033	-0.801	0.033	0.196	0.204	0.664	0.36	0.19		0.927	0.902	0.54	0.652	0.823		0	-0.15125	0.44373		0.282	0.3545	0.220251		0.823	0.7688	0.167107		At5g42420	transporter-related low similarity to phosphoenolpyruvate/phosphate translocator precursor [Mesembryanthemum crystallinum] GI:9295275, glucose-6-phosphate/phosphate-translocator precursor [Solanum tuberosum] GI:2997593
A018282_01	3.74897	0.5912	0.157697	1.51228	0.760034		A018282_01	At5g11150		0.044	-0.377	-0.044	0.058	0.547	0.712	0.734	0.517	0.271	1.52	1.124	0.926	1.013	1.154		0	-0.07975	0.203244		0.547	0.5562	0.186311		1.124	1.1474	0.227213		At5g11150	synaptobrevin / vesicle-associated membrane protein 713 (VAMP713) identified as AtVAMP713 by Sanderfoot, A.A., et al. in Plant Physiol. 124: 1558-69 (2000); similar to Vesicle-associated membrane protein 722 (AtVAMP722) Synaptobrevin-related protein 1 (SP
A018289_01	3.01426	0.384	0.127394	1.29235	2.16718		A018289_01	At5g43210	0.038	0	-0.573	-0.319	0.347	-0.349	-0.34	-0.036	-0.371	-0.673	0.026	0.021	0.034	0.014	0.056		0	-0.1014	0.353742		-0.349	-0.3538	0.225497		0.026	0.0302	0.0161617		At5g43210	endo/excinuclease amino terminal domain-containing protein contains Pfam domain PF01541: Endo/excinuclease amino terminal domain
A018314_01	2.69303	0.2424	0.0900102	1.18125	3.27795		A018314_01	At5g13570	-0.255	0.126	0.499	0	-0.246	0.023	0.108	0.156	-0.143	-0.035	0.358	0.176	0.318	0.28	0.189		0	0.0248	0.311184		0.023	0.0218	0.118138		0.28	0.2642	0.0796505		At5g13570	MutT/nudix family protein similar to mRNA-decapping enzyme [Homo sapiens] GI:23268269; contains Pfam profile PF00293: NUDIX domain
A018332_01	4.03026	1.2294	0.305042	2.304	0.534461		A018332_01	At5g42900	-0.633	0.309	-0.813	0.013	0	-0.83	-1.053	-1.465	-1.78	-1.999	0.076	0.219	-0.404	-0.119	-0.752		0	-0.2248	0.475561		-1.465	-1.4254	0.487214		-0.119	-0.196	0.38876		At5g42900	expressed protein similar to unknown protein (pir||T05226)
A018348_01	2.71389	0.5316	0.195881	1.43875	3.27795		A018348_01	At5g56550	0	-0.13	0.271	-0.623	0.078	-0.255	0.05	0.037	-0.402	-0.639	0.138	0.222	0.114	0.273	0.702		0	-0.0808	0.336122		-0.255	-0.2418	0.294314		0.222	0.2898	0.239132		At5g56550	expressed protein
A018561_01	3.71062	0.4284	0.115452	1.34901	0.760034		A018561_01	At5g64270	-0.065	0	-0.026	0.467	0.356	0.103	0.13	-0.043	0.21	-0.068	0.525	0.438	0.372	0.379	0.76		0	0.1464	0.246253		0.103	0.0664	0.118361		0.438	0.4948	0.160436		At5g64270	splicing factor, putative similar to splicing factor 3B subunit 1 (Spliceosome associated protein 155) (SAP 155) (SF3b155) (Pre-mRNA splicing factor SF3b 155 kDa subunit) (146 kDa nuclear protein) SP:O57683 from [Xenopus laevis]
A018578_01	5.41378	0.766	0.141491	1.68638	0		A018578_01	At5g40720	-0.222	0.159	0	0.201	-0.252	0.048	0.089	0.325	0.558	0.006	0.878	1.147	0.956	0.995	0.88		0	-0.0228	0.209685		0.089	0.2052	0.232763		0.956	0.9712	0.110348		At5g40720	expressed protein contains Pfam profile PF01697: Domain of unknown function
A018604_01	2.50592	0.4432	0.176861	1.35052	5.37887		A018604_01	At5g14800	-0.01	0.137	0.195	0	-0.001	0.482	0.282	-0.185	0.104	-0.095	0.614	0.328	0.534	0.467	0.861		0	0.0642	0.0952455		0.104	0.1176	0.272381		0.534	0.5608	0.197903		At5g14800	pyrroline-5-carboxylate reductase identical to pyrroline-5-carboxylate reductase SP:P54904 from [Arabidopsis thaliana]
A018678_01	3.40856	0.57656	0.16915	1.46666	1.24313		A018678_01	At5g55560	0.039	-0.039	-0.299		0.441	0.296	0.285	0.08	0.53	0.878	1.118	0.994	1.03		0.954		0	0.0355	0.306531		0.296	0.4138	0.304497		1.012	1.024	0.0699333		At5g55560	protein kinase family protein contains protein kinase domain, Pfam:PF00069
A018719_01	4.52814	0.7344	0.162186	1.65513	0.21257		A018719_01	At5g23920	-0.125	0.055	-0.499	0.238	0	-0.66	-0.335	-0.384	-0.942	-0.663	0.005	-0.015	0.279	0.041	0.378		0	-0.0662	0.274947		-0.66	-0.5968	0.245643		0.041	0.1376	0.178876		At5g23920	expressed protein
A018803_01	2.89909	0.3024	0.104309	1.23698	2.75256		A018803_01	At5g65430	0	0.132	0.434	-0.188	-0.083	0.182	0.181	0.363	0.312	0.298	0.627	0.65	0.624	0.652	0.295		0	0.059	0.240108		0.298	0.2672	0.0818883		0.627	0.5696	0.15404		At5g65430	14-3-3 protein GF14 kappa (GRF8) identical to 14-3-3 protein GF14 kappa GI:5802794, SP:P48348 from [Arabidopsis thaliana]
A018807_01	2.79385	0.4698	0.168155	1.36857	2.75256		A018807_01	At5g40200	0.066	0.051	0	-0.102	-0.187	-0.038	-0.08	-0.355	0.02	-0.672	0.233	0.19	0.332	0.406	0.063		0	-0.0344	0.107719		-0.08	-0.225	0.288413		0.233	0.2448	0.132082		At5g40200	DegP protease, putative contains similarity to DegP2 protease GI:13172275 from [Arabidopsis thaliana]
A018815_01	2.63275	0.3346	0.127091	1.25973	4.47718		A018815_01	At5g65990	-0.017	0.038	-0.509	0.28	0	-0.222	-0.401	-0.555	-0.657	-0.378	-0.074	-0.109	-0.266	-0.213	0.122		0	-0.0416	0.287472		-0.401	-0.4426	0.168203		-0.109	-0.108	0.150038		At5g65990	amino acid transporter family protein similar to proton/amino acid transporter 1 [Mus musculus] GI:21908024; contains Pfam profile PF01490: Transmembrane amino acid transporter protein
A018825_01	3.67667	1.0338	0.281178	1.95081	0.760034		A018825_01	At5g17760	0	0.014	-1.126			1.514	0.746	0.622	1.086	0.066	1.72	2.15	1.688	1.808	1.837		0	-0.370667	0.654175		0.746	0.8068	0.53961		1.808	1.8406	0.183463		At5g17760	AAA-type ATPase family protein contains Pfam profile: ATPase family PF00004
A018904_01	4.7441	0.554	0.116777	1.46798	0.21257		A018904_01	At5g58575	-0.414	0.193	-0.277	0	0.028	-0.101	-0.091	-0.328	-0.357	-0.051	0.547	0.329	0.233	0.248	0.485		0	-0.094	0.245956		-0.101	-0.1856	0.14481		0.329	0.3684	0.141311		At5g58575	expressed protein
A018925_01	3.37626	0.5632	0.166812	1.45527	1.24313		A018925_01	At5g46180	-0.153	0.041	-0.875	0.08	0	-0.172	0.088	0.234	-0.116	-0.557	0.535	0.421	0.505	0.518	0.314		0	-0.1814	0.397676		-0.116	-0.1046	0.300451		0.505	0.4586	0.0919799		At5g46180	ornithine aminotransferase, putative / ornithine--oxo-acid aminotransferase, putative similar to SP|Q92413 Ornithine aminotransferase (EC 2.6.1.13) (Ornithine--oxo-acid aminotransferase) [Aspergillus nidulans] {Emericella nidulans}; contains Pfam profile
A018952_01	2.7663	0.4094	0.147996	1.34116	3.27795		A018952_01	At5g39590	0	-0.039	0.31	0.051	-0.351	0.06	0.179	0.276	0.098	0.034	0.673	0.496	0.678	0.733	0.114		0	-0.0058	0.236249		0.098	0.1294	0.0985586		0.673	0.5388	0.253667		At5g39590	expressed protein
A018964_01	3.48675	0.4468	0.128142	1.35128	1.24313		A018964_01	At5g56180	-0.052	0.07	-0.789	0.05	0	-0.236	0.111	0.161	-0.003	-0.348	0.43	0.416	0.382	0.401	0.29		0	-0.1442	0.363544		-0.003	-0.063	0.220911		0.401	0.3838	0.0553823		At5g56180	actin-related protein, putative (ARP8) strong similarity to actin-related protein 8A (ARP8) [Arabidopsis thaliana] GI:21427473; contains Pfam profile PF00022: Actin; supporting cDNA gi|21427470|gb|AF507916.1|
A018974_01	2.88133	0.5988	0.20782	1.47714	2.75256		A018974_01	At5g23340	-0.071	0.125	-0.347	0	0.215	-0.167	-0.131	-0.304	-0.46	-1.095	0.217	0.309	0.071	0.069	0.171		0	-0.0156	0.215687		-0.304	-0.4314	0.392925		0.171	0.1674	0.101857		At5g23340	expressed protein
A019281_01	2.49225	0.4122	0.165393	1.33804	5.37887		A019281_01	At5g14420	-0.01	0	-0.031	0.361	0.413	0.221	0.184	0.058	-0.197	-0.13	0.573	0.417	0.284	0.141	0.782		0	0.1466	0.220507		0.058	0.0272	0.185789		0.417	0.4394	0.249458		At5g14420	copine-related low similarity to SP|Q99829 Copine I {Homo sapiens}
A019331_01	6.55699	0.5702	0.0869606	1.48285	0		A019331_01	At5g14940	-0.365	0	0.244	0.289	-0.711	0.193	0.043	-0.011	0.139	-0.085	0.631	0.757	0.574	0.585	0.583		0	-0.1086	0.425098		0.043	0.0558	0.112023		0.585	0.626	0.076518		At5g14940	proton-dependent oligopeptide transport (POT) family protein contains Pfam profile: PF00854 POT family
A019361_01	2.72952	0.266	0.0974532	1.19774	3.27795		A019361_01	At5g16680	0	-0.07	0.365	0.152	-0.309	0.089	0.16	0.072	0.288	-0.129	0.443	0.329	0.329	0.365	0.344		0	0.0276	0.251446		0.089	0.096	0.15183		0.344	0.362	0.0476235		At5g16680	PHD finger family protein contains Pfam domain, PF00628: PHD-finger
A019466_01	2.59144	0.5838	0.22528	1.46582	4.47718		A019466_01	At5g54250	0.002	0	-0.467	0.479	-0.26	-0.772	-0.636	-0.516	-0.791	-1.551	-0.249	-0.196	-0.253	-0.078	-0.571		0	-0.0492	0.354623		-0.772	-0.8532	0.405668		-0.249	-0.2694	0.182804		At5g54250	cyclic nucleotide-regulated ion channel / cyclic nucleotide-gated channel (CNGC4) identical to cyclic nucleotide and calmodulin-regulated ion channel (cngc4) GI:4581203 from [Arabidopsis thaliana]
A019494_01	2.72676	0.545	0.199871	1.43978	3.27795		A019494_01	At3g50440	-0.193	0	0.055	-0.166	0.039	-0.424	-0.058	0.165	-0.593	-0.545	0.389	0.118	0.106	0.108	0.549		0	-0.053	0.117586		-0.424	-0.291	0.330013		0.118	0.254	0.204307		At3g50440	hydrolase, alpha/beta fold family protein similar to ethylene-induced esterase [Citrus sinensis] GI:14279437, polyneuridine aldehyde esterase [Rauvolfia serpentina] GI:6651393; contains Pfam profile PF00561: hydrolase, alpha/beta fold family
A019512_01	2.66039	0.5016	0.188544	1.39781	4.47718		A019512_01	At4g32340	-0.466	0	-1.265	0.739	0.126	0.031	0.519	0.514	-0.035	-0.134	0.801	0.692	0.534	0.468	0.908		0	-0.1732	0.746557		0.031	0.179	0.313646		0.692	0.6806	0.182364		At4g32340	expressed protein
A019513_01	3.16798	0.5632	0.177779	1.47699	1.7537		A019513_01	At4g32250	0	-0.144	-0.543	0.512	0.27	-0.171	-0.561	-0.578	-0.767	-0.744	0.312	0.04	-0.201	-0.277	0.121		0	0.019	0.402748		-0.578	-0.5642	0.238884		0.04	-0.001	0.240161		At4g32250	protein kinase family protein contains protein kinase domain, Pfam:PF00069
A019515_01	2.47103	0.2916	0.118007	1.22208	5.37887		A019515_01	At4g17840	0.07	-0.003	-0.28	0.202	0	-0.311	-0.465	-0.424	-0.238	-0.652	-0.006	-0.077	-0.264	-0.267	-0.018		0	-0.0022	0.176131		-0.424	-0.418	0.158784		-0.077	-0.1264	0.129797		At4g17840	expressed protein
A019541_01	3.12072	0.3478	0.111449	1.27339	1.7537		A019541_01	At4g32900	0	0.142	-0.326	-0.089	0.349	-0.337	-0.297	-0.329	-0.404	-0.619	0.121	-0.121	-0.204	-0.116	0.073		0	0.0152	0.252491		-0.337	-0.3972	0.129958		-0.116	-0.0494	0.139177		At4g32900	expressed protein
A019553_01	2.50273	0.5078	0.202898	1.40427	5.37887		A019553_01	At4g40050	-0.156	0.074	-0.38	0.211	0	-0.264	-0.267	-0.138	-0.293	-0.99	0.185	0.134	-0.145	0.019	0.394		0	-0.0502	0.227009		-0.267	-0.3904	0.340557		0.134	0.1174	0.199931		At4g40050	expressed protein
A019580_01	2.49137	0.3222	0.129326	1.25134	5.37887		A019580_01	At4g01410	-0.499	0	0.095	-0.07	0.081	0.093	0.06	-0.115	-0.219	-0.25	0.245	0.091	0.202	0.125	0.517		0	-0.0786	0.244232		-0.115	-0.0862	0.157149		0.202	0.236	0.168481		At4g01410	harpin-induced family protein / HIN1 family protein / harpin-responsive family protein similar to harpin-induced protein hin1 ( GI:1619321) [Nicotiana tabacum]
A019812_01	2.48053	1.0604	0.427489	1.86368	5.37887		A019812_01	At3g51860	0	0.265	-0.504	0.003	-0.406	1.77	1.739	0.794	1.414	-0.306	1.814	2.433	2.138	2.189	2.139		0	-0.1284	0.318847		1.414	1.0822	0.869584		2.139	2.1426	0.220509		At3g51860	cation exchanger, putative (CAX3) similar to high affinity calcium antiporter CAX1 [Arabidopsis thaliana] gi|9256741|gb|AAB05913; Ca2+:Cation Antiporter (CaCA) Family member PMID:11500563; non-consensus AT-acceptor splice site at intron 1
A019892_01	4.74366	0.9096	0.191751	1.84582	0.21257		A019892_01	At1g78290	-0.148	0.356	-0.344	0.176	0	0.76	0.975	1.096	0.626	0.22	1.734	1.781	1.467	1.515	1.728		0	0.008	0.272778		0.76	0.7354	0.341193		1.728	1.645	0.143082		At1g78290	serine/threonine protein kinase, putative similar to serine-threonine protein kinase [Triticum aestivum] gi|2055374|gb|AAB58348
A019925_01	3.36976	0.6168	0.18304	1.52851	1.24313		A019925_01	At1g64050	-0.041	-0.221	0.023	0	0.024	-0.235	-0.404	-0.411	-0.693	-0.901	0.195	0.327	-0.159	-0.156	0.233		0	-0.043	0.102934		-0.411	-0.5288	0.265172		0.195	0.088	0.229205		At1g64050	expressed protein
A019928_01	2.61876	0.2934	0.112038	1.22753	4.47718		A019928_01	At1g64490	0	0.058	0.293	-0.383	-0.183	0.104	0.202	0.005	-0.102	-0.025	0.454	0.478	0.189	0.152	0.378		0	-0.043	0.255023		0.005	0.0368	0.118219		0.378	0.3302	0.150954		At1g64490	expressed protein
A019985_01	2.4676	0.2794	0.113227	1.20979	5.37887		A019985_01	At3g19800	0.114	0	-0.21	-0.018	0.162	-0.337	-0.22	-0.253	-0.277	-0.633	-0.168	-0.104	-0.017	-0.118	0.084		0	0.0096	0.144225		-0.277	-0.344	0.16712		-0.104	-0.0646	0.0993016		At3g19800	expressed protein
A019997_01	2.45203	0.1912	0.0779763	1.13948	5.37887		A019997_01	At5g54900	0.186	-0.213	0.279	0	-0.239	0.229	0.12	-0.036	0.123	0.23	0.366	0.355	0.268	0.317	0.316		0	0.0026	0.231783		0.123	0.1332	0.108921		0.317	0.3244	0.0386432		At5g54900	RNA-binding protein 45 (RBP45), putative contains similarity to polyadenylate-binding protein 5
A020071_01	2.47584	0.9324	0.376599	1.72876	5.37887		A020071_01	At1g22990	2.178	0	1.731	-0.195	-0.914	0.5	0.886	0.203	0.655	2.087	1.686	1.68	2.258	1.886	1.483		0	0.56	1.32716		0.655	0.8662	0.726169		1.686	1.7986	0.293698		At1g22990	heavy-metal-associated domain-containing protein / copper chaperone (CCH)-related low similarity to copper homeostasis factor [GI:3168840][PMID:9701579]; strong similarity to farnesylated protein ATFP7 [GI:4097555]; contains heavy-metal-associated domain
A020116_01	2.99224	0.2592	0.0866239	1.19624	2.16718		A020116_01	At5g12170	-0.126	0	0.406	0.144	-0.12	-0.342	-0.41	-0.157	-0.376	-0.262	0.041	-0.057	-0.094	0.031	-0.172		0	0.0608	0.222129		-0.342	-0.3094	0.101355		-0.057	-0.0502	0.0890376		At5g12170	expressed protein similar to unknown protein (pir||T09909)
A020194_01	3.53649	0.4988	0.141044	1.40386	1.02009		A020194_01	At3g53700	-0.034	0.054	0	0.252	-0.239	-0.418	-0.092	-0.152	-0.369	-0.651	0.128	0.189	0.301	0.226	-0.032		0	0.0066	0.176408		-0.369	-0.3364	0.223847		0.189	0.1624	0.125436		At3g53700	pentatricopeptide (PPR) repeat-containing protein low similarity to fertility restorer [Petunia x hybrida] GI:22128587; contains Pfam profile PF01535: PPR repeat
A020207_01	2.52231	0.487	0.193077	1.38619	4.47718		A020207_01	At1g20190	0	0.196	-0.279	-0.046	0.583	-1.131	-1.136	-0.608	-1.419	-1.286	-0.383	-0.956	-0.627	-0.533	-0.646		0	0.0908	0.322893		-1.136	-1.116	0.307976		-0.627	-0.629	0.21033		At1g20190	expansin, putative (EXP11) similar to GB:U30460 from [Cucumis sativus]; alpha-expansin gene family, PMID:11641069
A020210_01	3.10063	0.4034	0.130102	1.31575	1.7537		A020210_01	At1g31970	0.029	0	-0.255	0.027	-0.042	0.179	0.255	-0.125	-0.022	-0.223	0.583	0.351	0.295	0.369	0.483		0	-0.0482	0.119104		-0.022	0.0128	0.201299		0.369	0.4162	0.115599		At1g31970	DEAD/DEAH box helicase, putative similar to p68 RNA helicase [Schizosaccharomyces pombe] GI:173419
A020278_01	3.10839	0.2134	0.0686529	1.15922	1.7537		A020278_01	At3g47290	-0.066	0	-0.401	0.207	0.277	-0.342	-0.318	-0.169	-0.31	-0.323	-0.121	0.015	-0.129	-0.12	-0.04		0	0.0034	0.266776		-0.318	-0.2924	0.0699807		-0.12	-0.079	0.0638396		At3g47290	phosphoinositide-specific phospholipase C family protein similar to phosphoinositide-specific phospholipase C [Nicotiana rustica] GI:1771381, 1-phosphatidylinositol-4,5-bisphosphate phosphodiesterase [Nicotiana rustica] GI:2765140; contains Pfam profiles
A020285_01	3.22293	1.2748	0.39554	2.60354	1.47491		A020285_01	At1g19530		0	1.402	-0.97		0.851	1.594	0.604	0.686	0.87	3.266	2.309	1.391	2.348	1.665		0	0.144	1.19254		0.851	0.921	0.392474		2.309	2.1958	0.726423		At1g19530	expressed protein
A020316_01	2.94021	0.3316	0.112781	1.25285	2.16718		A020316_01	At5g01350	-0.019	0.415	0.619	-0.043	0	0.66	0.611	0.517	0.382	0.232	0.746	0.931	0.864	0.78	0.739		0	0.1944	0.303578		0.517	0.4804	0.174669		0.78	0.812	0.0830271		At5g01350	expressed protein
A020342_01	2.69715	0.2876	0.106631	1.21922	3.27795		A020342_01	At2g05630	-0.059	0	0.237	0.174	-0.11	0.516	0.454	0.325	0.337	0.658	0.838	0.773	0.594	0.66	0.863		0	0.0484	0.150261		0.454	0.458	0.137577		0.773	0.7456	0.115522		At2g05630	autophagy 8d (APG8d) identical to autophagy 8d [Arabidopsis thaliana] GI:19912157; contains Pfam profile PF02991: Microtubule associated protein 1A/1B, light chain 3
A020350_01	5.25488	1.0448	0.198825	2.07724	0		A020350_01	At3g15500		0.188	0.194	-0.188	-0.54	-0.218	-0.126	-0.302	-0.547	-0.694	0.839	0.366	0.942	0.883	0.307		0	-0.0865	0.351186		-0.302	-0.3774	0.236271		0.839	0.6674	0.304986		At3g15500	no apical meristem (NAM) family protein (NAC3) identical to AtNAC3 [Arabidopsis thaliana] GI:12060424; contains Pfam PF02365: No apical meristem (NAM) domain; similar to jasmonic acid 2 GB:AAF04915 from [Lycopersicon esculentum]
A020351_01	2.469	0.4642	0.188011	1.35408	5.37887		A020351_01	At2g21210	0.225	-0.077	0	0.331	-0.088	-0.026	0.032	-0.678	-0.647	-0.189	0.254	0.16	0.312	0.004	0.083		0	0.0782	0.189264		-0.189	-0.3016	0.339449		0.16	0.1626	0.124671		At2g21210	auxin-responsive protein, putative similar to small auxin-up regulated protein SAUR (GI:3043536) [Raphanus sativus]
A020368_01	2.61108	0.332	0.12715	1.26104	4.47718		A020368_01	At2g31380	0.123	0	-0.546	-0.015	0.218	-0.68	-0.637	-0.474	-0.355	-0.678	-0.322	-0.422	-0.196	-0.263	0.039		0	-0.044	0.296359		-0.637	-0.5648	0.144533		-0.263	-0.2328	0.173129		At2g31380	zinc finger (B-box type) family protein / salt tolerance-like protein (STH) contains Pfam profile PF00643: B-box zinc finger; identical to cDNA B-box zinc finger protein STH GI:12698721, SP|Q9SID1 Salt tolerance-like protein (Arabidopsis thaliana)
A020589_01	4.1707	0.548	0.131393	1.46862	0.527996		A020589_01	At5g65210	0	0.062	0.077	-0.024	-0.078	-0.309	-0.219	-0.201	-0.026	-0.029	0.387	0.414	0.423	0.645	0.087		0	0.0074	0.0635594		-0.201	-0.1568	0.124929		0.414	0.3912	0.199061		At5g65210	bZIP family transcription factor (TGA1) identical to transcription factor (TGA1) GI:16550 from [Arabidopsis thaliana]
A020605_01	5.27028	1.9498	0.369961	3.60914	0		A020605_01	At2g25450	0.266	0	-0.301	-0.231	0.082	0.355	0.17	-0.746	1.152	0.643	2.017	1.843	2.593	2.454	2.416		0	-0.0368	0.231663		0.355	0.3148	0.699375		2.416	2.2646	0.31847		At2g25450	2-oxoglutarate-dependent dioxygenase, putative similar to 2A6 (GI:599622) and tomato ethylene synthesis regulatory protein E8 (SP|P10967)
A020617_01	3.69786	0.477	0.128994	1.38607	0.760034		A020617_01	At1g54100	0.166	-0.023	0.103	0	-0.014	-0.185	-0.333	-0.194	0.018	0.154	0.557	0.257	0.259	0.417	0.355		0	0.0464	0.0838528		-0.185	-0.108	0.192659		0.355	0.369	0.124988		At1g54100	aldehyde dehydrogenase, putative / antiquitin, putative strong similarity to SP|Q41247 Aldehyde dehydrogenase family 7 member A1 (EC 1.2.1.3) (Antiquitin 1) (Brassica turgor-responsive/drought-induced gene 26 protein) (Btg-26) {Brassica napus}; similar to
A020661_01	3.1156	0.457	0.146681	1.36044	1.7537		A020661_01	At3g02220	0.056	0.079	0	-0.034	-0.157	0.236	0.201	0.208	-0.073	-0.332	0.602	0.382	0.454	0.453	0.634		0	-0.0112	0.0929446		0.201	0.048	0.246675		0.454	0.505	0.107801		At3g02220	expressed protein
A020666_01	2.72275	1.1936	0.43838	2.11767	3.27795		A020666_01	At4g33150	1.135	0.064	-0.164	0	-0.661	-0.3	-0.344	-0.628	-0.597	-2.312	0.792	0.346	0.151	0.657	-0.159		0	0.0748	0.657298		-0.597	-0.8362	0.837902		0.346	0.3574	0.383418		At4g33150	lysine-ketoglutarate reductase/saccharopine dehydrogenase bifunctional enzyme identical to lysine-ketoglutarate reductase/saccharopine dehydrogenase GI:2052508 from [Arabidopsis thaliana]
A020693_01	2.98238	0.2978	0.0998532	1.22628	2.16718		A020693_01	At3g62650	-0.329	0.045	0.237	-0.201	0	-0.4	-0.229	-0.131	-0.195	-0.015	0.189	0.04	0.148	0.152	-0.01		0	-0.0496	0.220531		-0.195	-0.194	0.141131		0.148	0.1038	0.0844938		At3g62650	expressed protein putative mitochondrial carrier protein At2g47490 - Arabidopsis thaliana, EMBL:AC002535
A020748_01	3.94148	0.8556	0.217076	1.83897	0.534461		A020748_01	At2g05540	0	-0.236	-0.992	0.635	0.012	0.043	0.491	0.485	0.243	0.038	1.565	0.873	0.752	0.947	1.441		0	-0.1162	0.586433		0.243	0.26	0.223969		0.947	1.1156	0.363088		At2g05540	glycine-rich protein
A020765_01	2.70802	0.307	0.113367	1.23104	3.27795		A020765_01	At2g22690	0.008	0.066	-0.047	-0.2	0	-0.146	-0.141	-0.168	-0.082	-0.532	0.066	0.204	0.044	0.026	0.126		0	-0.0346	0.100801		-0.146	-0.2138	0.180705		0.066	0.0932	0.0725066		At2g22690	expressed protein
A020803_01	2.76209	0.5796	0.209841	1.45904	3.27795		A020803_01	At4g37520	0.05	-0.053	-0.7	0	0.028	0.09	0.157	0.337	0.275	-0.637	0.454	0.64	0.668	0.582	0.776		0	-0.135	0.318185		0.157	0.0444	0.393019		0.64	0.624	0.118279		At4g37520	peroxidase 50 (PER50) (P50) (PRXR2) identical to SP|Q43731 Peroxidase 50 precursor (EC 1.11.1.7) (Atperox P50) (PRXR2) (ATP9a)] {Arabidopsis thaliana}
A020869_01	3.09079	0.4988	0.161383	1.42393	1.7537		A020869_01	At5g54080	-0.279	0	-0.076	0.253	0.335	-0.177	-0.069	-0.053	-0.264	-0.444	0.593	0.311	-0.004	0.089	0.498		0	0.0466	0.249496		-0.177	-0.2014	0.160407		0.311	0.2974	0.255967		At5g54080	homogentisate 1,2-dioxygenase / homogentisicase/homogentisate oxygenase / homogentisic acid oxidase (HGO) identical to SP|Q9ZRA2 Homogentisate 1,2-dioxygenase (EC 1.13.11.5) (Homogentisicase) (Homogentisate oxygenase) (Homogentisic acid oxidase) {Arabidop
A020952_01	3.50594	0.3904	0.111354	1.30363	1.24313		A020952_01	At1g22640	-0.178	0	-0.635	0.203	0.045	-0.721	-0.688	-0.483	-0.876	-0.942	-0.402	-0.326	-0.416	-0.257	-0.357		0	-0.113	0.32183		-0.721	-0.742	0.179161		-0.357	-0.3516	0.0638772		At1g22640	myb family transcription factor (MYB4) similar to myb-related protein GI:1020155 from [Arabidopsis thaliana]
A020984_01	2.4873	0.4074	0.163792	1.30724	5.37887		A020984_01	At4g22540	-0.081	0.072	-0.104	0.14	0	0.082	0.428	0.401	-0.017	-0.265	0.45	0.593	0.516	0.664	0.443		0	0.0054	0.102488		0.082	0.1258	0.292444		0.516	0.5332	0.0949194		At4g22540	oxysterol-binding family protein similar to SP|P16258 Oxysterol-binding protein 1 {Oryctolagus cuniculus}; contains Pfam profiles PF00169: PH domain, PF01237: Oxysterol-binding protein
A021109_01	2.59808	0.8964	0.345024	1.76472	4.47718		A021109_01	At5g53970	0.003	-0.07	-1.197	0	0.018	-1.031	-1.04	-0.969	-1.027	-2.49	-0.108	-0.157	-0.67	-0.474	-0.666		0	-0.2492	0.530928		-1.031	-1.3114	0.659451		-0.474	-0.415	0.270333		At5g53970	aminotransferase, putative similar to nicotianamine aminotransferase from Hordeum vulgare [GI:6498122, GI:6469087]; contains Pfam profile PF00155 aminotransferase, classes I and II
A021295_01	2.65359	0.3184	0.119989	1.24841	4.47718		A021295_01	At4g25690	-0.051	0.071	0.183	-0.152	0	0.008	-0.095	0.042	-0.051	-0.308	0.38	0.347	0.009	0.313	0.139		0	0.0102	0.126209		-0.051	-0.0808	0.137545		0.313	0.2376	0.158044		At4g25690	expressed protein
A021709_01	3.09683	0.6938	0.224035	1.59857	1.7537		A021709_01	At1g49660	0	0.21	-0.568	-0.178	0.085	-1.214	-1.06	-0.652	-1.181	-1.651	-0.492	-0.831	-0.142	-0.299	-0.525		0	-0.0902	0.302057		-1.181	-1.1516	0.357823		-0.492	-0.4578	0.259765		At1g49660	expressed protein
A021858_01	2.60968	0.2368	0.0907391	1.17444	4.47718		A021858_01	At1g64750	0.086	0	0.271	-0.293	-0.241	0.414	0.383	0.258	0.255	0.062	0.576	0.506	0.501	0.471	0.502		0	-0.0354	0.233721		0.258	0.2744	0.138781		0.502	0.5112	0.0388291		At1g64750	DSS1/SEM1 family protein contains Pfam profile PF05160: DSS1/SEM1 family
A021885_01	2.47445	0.3352	0.135465	1.27024	5.37887		A021885_01	At5g17190	-0.17	0.065	-0.146	0	0.074	0.379	0.386	0.437	0.581	0.621	0.855	0.79	0.634	0.638	1.163		0	-0.0354	0.115814		0.437	0.4808	0.112877		0.79	0.816	0.216457		At5g17190	expressed protein similar to unknown protein (gb|AAF26109.1)
A021954_01	2.75247	0.7778	0.282582	1.74074	3.27795		A021954_01	At2g05380	0	-0.29	-1.762	0.614	0.017	1.618	1.555	0.979	1.088	0.827	2.008	2.175	1.429	1.726	2.618		0	-0.2842	0.889126		1.088	1.2134	0.353682		2.008	1.9912	0.450928		At2g05380	glycine-rich protein (GRP3S) identical to cDNA glycine-rich protein 3 short isoform (GRP3S) GI:4206766
A022124_01	2.62429	2.0886	0.795873	3.05877	4.47718		A022124_01	At2g14610	1.957	0	2.395	-1.124	-1.35	1.593	-0.442	-0.289	2.094	3.199	2.847	2.83	3.918	4.243	2.76		0	0.3756	1.72818		1.593	1.231	1.56989		2.847	3.3196	0.704798		At2g14610	pathogenesis-related protein 1 (PR-1) identical to GB:M90508 SP|P33154
A022247_01	2.48368	0.401	0.161454	1.30791	5.37887		A022247_01	At3g12590	0.03	0	-0.085	0.273	-0.083	0.109	0.296	0.291	0.206	-0.353	0.643	0.504	0.492	0.617	0.298		0	0.027	0.146542		0.206	0.1098	0.269696		0.504	0.5108	0.136417		At3g12590	expressed protein
A022339_01	3.13927	0.6184	0.196989	1.50224	1.7537		A022339_01	At4g34020	-0.29	0	-0.907	0.01	0.322	-0.296	-0.232	-0.301	-0.802	-1.04	0.127	0.01	0.025	-0.008	0.267		0	-0.173	0.46392		-0.301	-0.5342	0.364004		0.025	0.0842	0.114846		At4g34020	DJ-1 family protein similar to CAP1 [Rattus norvegicus] GI:3250916, ThiJ protein, Escherichia coli, PIR:H64771; contains Pfam profile PF01965 ThiJ/PfpI family
A022369_01	2.89094	0.5074	0.175514	1.39963	2.75256		A022369_01	At4g19700	-0.508	0.058	-0.772	0	0.04	-0.124	0.073	-0.211	-0.109	-0.759	0.124	0.356	0.244	0.276	0.407		0	-0.2364	0.380653		-0.124	-0.226	0.31536		0.276	0.2814	0.109022		At4g19700	expressed protein
A022485_01	3.26041	0.46772	0.143454	1.3704	1.47491		A022485_01	At4g11110		-0.192	-0.219	0.247	0.192	-0.214	-0.48	-0.405	-0.364		-0.081	-0.07	0.126	-0.05	0.085		0	0.007	0.246645		-0.385	-0.36575	0.111989		-0.05	0.002	0.0962315		At4g11110	WD-40 repeat family protein / phytochrome A-related contains 7 WD-40 repeats (PF00400); similar to phytochrome A supressor spa1 (GI:4809171) [Arabidopsis thaliana]; contains non-consensus (GC) donor splice sites at introns 4 and 6
A022543_01	4.1499	0.8904	0.214559	1.82735	0.527996		A022543_01	At4g01430		-0.183	0	0.408		1.481	1.151	0.643	1.019	1.515	2.084	1.941	1.976	1.846	2.414		0	0.075	0.302554		1.151	1.1618	0.35927		1.976	2.0522	0.219432		At4g01430	nodulin MtN21 family protein similar to MtN21 GI:2598575 (root nodule development) from [Medicago truncatula]
A022555_01	4.2722	0.503	0.117738	1.41946	0.527996		A022555_01	At4g02860	0	0.093	-0.015	0.077	-0.053	0.073	0.087	0.115	0.281	-0.079	0.662	0.734	0.475	0.386	0.735		0	0.0204	0.0623121		0.087	0.0954	0.128276		0.662	0.5984	0.159243		At4g02860	phenazine biosynthesis PhzC/PhzF family protein contains Pfam profile: PF02567 phenazine biosynthesis-like protein
A022634_01	4.94009	0.8062	0.163195	1.72911	0		A022634_01	At4g37150	0	-0.391	0.067			0.092	-0.033	-0.088	0.08	0.596	0.828	0.969	0.817	1.163	0.901		0	-0.108	0.247364		0.08	0.1294	0.271658		0.901	0.9356	0.141127		At4g37150	esterase, putative similar to ethylene-induced esterase [Citrus sinensis] GI:14279437, polyneuridine aldehyde esterase [Rauvolfia serpentina] GI:6651393; contains Pfam profile PF00561: hydrolase, alpha/beta fold family
A022924_01	2.97517	0.7148	0.240255	1.58178	2.16718		A022924_01	At5g39850	-0.077	0.245	-0.23	0.182	0	0.919	0.797	0.398	0.104	-0.18	0.976	1.138	1.166	1.029	1.303		0	0.024	0.193066		0.398	0.4076	0.461167		1.138	1.1224	0.127394		At5g39850	40S ribosomal protein S9 (RPS9C) 40S ribosomal protein S9 - Chlamydomonas sp.,EMBL:AU066528
A023030_01	3.02823	0.4414	0.145762	1.34721	2.16718		A023030_01	At5g23870	0	-0.145	-0.339	0.366	0.421	0.071	0.139	0.007	0.125	-0.441	0.502	0.425	0.374	0.256	0.551		0	0.0606	0.327407		0.071	-0.0198	0.241121		0.425	0.4216	0.11501		At5g23870	pectinacetylesterase family protein contains Pfam profile: PF03283 pectinacetylesterase
A023066_01	2.61459	0.182	0.0696095	1.13439	4.47718		A023066_01	At5g12190	-0.046	0.133	-0.122	0.077	0	0.33	0.414	0.273	0.36	0.45	0.472	0.553	0.62	0.606	0.486		0	0.0084	0.100331		0.36	0.3654	0.0695327		0.553	0.5474	0.0674374		At5g12190	RNA recognition motif (RRM)-containing protein similar to SP|P52298 20 kDa nuclear cap binding protein (NCBP 20 kDa subunit) (CBP20) (NCBP interacting protein 1) (NIP1) {Homo sapiens}; contains InterPro entry IPR000504: RNA-binding region RNP-1 (RNA recog
A023091_01	4.92608	0.798	0.161995	1.73644	0		A023091_01	At5g40240	0.096	0	-0.512	0.459	-0.405	0.297	0.38	-0.018	0.315	-0.127	0.871	1.325	0.835	0.919	0.887		0	-0.0724	0.393655		0.297	0.1694	0.226277		0.887	0.9674	0.20218		At5g40240	nodulin MtN21 family protein similar to MtN21 [Medicago truncatula] GI:2598575; contains Pfam profile PF00892: Integral membrane protein
A023177_01	3.20649	0.2828	0.0881963	1.2139	1.7537		A023177_01	At5g08750	0.106	0.091	-0.505	-0.192	0	-0.17	0.136	0.026	-0.124	-0.079	0.246	0.219	0.169	0.228	0.341		0	-0.1	0.255639		-0.079	-0.0422	0.123273		0.228	0.2406	0.0629706		At5g08750	zinc finger (C3HC4-type RING finger) family protein contains Pfam profile: PF00097 zinc finger, C3HC4 type (RING finger)
A023609_01	3.39748	0.3844	0.113143	1.31067	1.24313		A023609_01	At2g01860	0	0.168	0.086	-0.392	-0.119	0.084	0.205	0.299	0.251	0.11	0.466	0.479	0.761	0.758	0.407		0	-0.0514	0.21808		0.205	0.1898	0.0914642		0.479	0.5742	0.17132		At2g01860	pentatricopeptide (PPR) repeat-containing protein contains Pfam profile PF01535: PPR repeat
A023725_01	2.66777	0.7414	0.27791	1.60667	3.27795		A023725_01	At1g34440	0	0.213	-0.547	-0.014	0.33	0.541	0.443	0.445	0.225	-0.746	0.805	0.991	0.762	0.841	1.216		0	-0.0036	0.336753		0.443	0.1816	0.53132		0.841	0.923	0.185096		At1g34440	hypothetical protein
A023979_01	2.51512	0.5655	0.22484	1.44279	5.37887		A023979_01	At3g08620	-0.061	0.053	-0.923	0.011	0	-0.601	-0.34	-0.307	-0.427		0.128	0.118	-0.13	-0.061	-0.218		0	-0.184	0.41512		-0.383	-0.41875	0.131622		-0.061	-0.0326	0.152594		At3g08620	KH domain-containing protein
A024003_01	2.82559	0.50848	0.179955	1.40876	2.75256		A024003_01	At1g49840	0.179	0.28	-0.57	0	-0.305	0.619	0.469	0.707	0.159		1.013	0.868	1.015	0.601	1.035		0	-0.0832	0.351338		0.544	0.4885	0.24064		1.013	0.9064	0.18333		At1g49840	expressed protein contains Pfam profile PF04788: Protein of unknown function (DUF620)
A024114_01	5.00445	0.7452	0.148908	1.68069	0		A024114_01	At4g19390	-0.369	0	0.149	0.086	-0.215	0.095	-0.053	-0.127	-0.357	0.048	0.989	0.528	0.458	0.738	0.619		0	-0.0698	0.216577		-0.053	-0.0788	0.177953		0.619	0.6664	0.208584		At4g19390	expressed protein
A024172_01	2.64683	0.3476	0.131327	1.26406	4.47718		A024172_01	At5g17440	-0.253	0.144	-0.416	0.355	0	-0.033	0.151	0.084	-0.196	-0.371	0.3	0.379	0.109	0.274	0.311		0	-0.034	0.307427		-0.033	-0.073	0.212343		0.3	0.2746	0.100366		At5g17440	LUC7 N_terminus domain-containing protein contains Pfam domain PF03194: Protein of unknown function, DUF259
A024181_01	3.30048	0.4044	0.122528	1.31389	1.47491		A024181_01	At2g18750	0	0.036	-0.084	0.199	-0.144	-0.16	-0.065	-0.057	-0.162	-0.563	0.202	0.217	0.116	0.215	0.265		0	0.0014	0.131034		-0.16	-0.2014	0.208253		0.215	0.203	0.0542079		At2g18750	calmodulin-binding protein similar to calmodulin-binding protein TCB60 GI:1698548 from [Nicotiana tabacum]
A024201_01	2.9535	0.3334	0.112883	1.26007	2.16718		A024201_01	At4g28200	-0.137	0.166	0.313	0	-0.248	0.307	0.264	0.155	0.106	-0.039	0.426	0.618	0.408	0.658	0.35		0	0.0188	0.225849		0.155	0.1586	0.136892		0.426	0.492	0.136938		At4g28200	expressed protein
A024282_01	2.91766	0.5292	0.181379	1.45247	2.16718		A024282_01	At5g62740	0	-0.1	-0.078	0.072	0.157	0.682	0.796	0.647	0.836	1.179	1.374	1.162	1.298	1.135	1.817		0	0.0102	0.106533		0.796	0.828	0.211167		1.298	1.3572	0.275081		At5g62740	band 7 family protein strong similarity to hypersensitive-induced response protein [Zea mays] GI:7716470; contains Pfam profile PF01145: SPFH domain / Band 7 family; supporting cDNA gi|17065547|gb|AY062850.1|
A024336_01	3.42732	1.1532	0.336473	2.10364	1.24313		A024336_01	At3g48360	-0.068	0	-0.527	0.337	0.196	1.167	1.83	2.385	0.852	1.193	2.535	2.431	2.386	2.664	3.177		0	-0.0124	0.32923		1.193	1.4854	0.61565		2.535	2.6386	0.319436		At3g48360	speckle-type POZ protein-related contains Pfam PF00651 : BTB/POZ domain; similar to Speckle-type POZ protein (SP:O43791) [Homo sapiens]
A024372_01	3.04066	0.3248	0.106819	1.24931	2.16718		A024372_01	At3g27020	-0.395	0	-0.543	0.33	0.17	-0.635	-0.472	-0.281	-0.316	-0.548	-0.063	-0.295	-0.065	-0.13	-0.075		0	-0.0876	0.370913		-0.472	-0.4504	0.150689		-0.075	-0.1256	0.0985738		At3g27020	oligopeptide transporter OPT family protein similar to iron-phytosiderophore transporter protein yellow stripe 1 [Zea mays] GI:10770865; contains Pfam profile PF03169: OPT oligopeptide transporter protein
A024460_01	4.06493	1.0336	0.254273	2.00447	0.534461		A024460_01	At1g13340	0.243	0.227	-0.289	0	-0.307	1.797	1.789	2.109	2.293	1.151	3.086	3.086	2.924	2.76	2.451		0	-0.0252	0.267008		1.797	1.8278	0.43474		2.924	2.8614	0.266233		At1g13340	expressed protein contains Pfam profile: PF03398 eukaryotic protein of unknown function, DUF292
A024478_01	3.13289	0.41	0.130869	1.32005	1.7537		A024478_01	At5g36160	0.188	0.119	-0.067	0	-0.07	-0.286	-0.439	-0.558	-0.15	-0.679	-0.079	0.15	0.008	-0.029	-0.112		0	0.034	0.115232		-0.439	-0.4224	0.210543		-0.029	-0.0124	0.101761		At5g36160	aminotransferase-related similar to nicotianamine aminotransferase B GI:6469087 from [Hordeum vulgare subsp. vulgare]
A024503_01	5.39963	1.156	0.214089	2.19564	0		A024503_01	At2g37750	0	0.219	-0.364	0.438	-0.385	-0.122	0.378	0.266	0.448	0.862	1.567	1.557	1.651	1.704	1.133		0	-0.0184	0.36015		0.378	0.3664	0.353916		1.567	1.5224	0.226017		At2g37750	expressed protein
A024527_01	3.48863	0.748	0.214411	1.6724	1.24313		A024527_01	At1g75750	0.546	-0.14	-0.042	0.086	0	2.044	2.189	1.633	2.453	1.842	2.835	2.534	3.136	2.929	2.467		0	0.09	0.267571		2.044	2.0322	0.315172		2.835	2.7802	0.278589		At1g75750	gibberellin-regulated protein 1 (GASA1) / gibberellin-responsive protein 1 identical to SP|P46689 Gibberellin-regulated protein 1 precursor {Arabidopsis thaliana}; supporting cDNA gi|887938|gb|U11766.1|ATU11766
A024548_01	3.41607	0.28	0.0819655	1.21287	1.24313		A024548_01	At2g46550	-0.042	-0.056	0.122	0.045	0	-0.183	-0.025	-0.182	-0.314	-0.157	-0.006	0.135	0.1	0.183	0.127		0	0.0138	0.0722094		-0.182	-0.1722	0.102736		0.127	0.1078	0.0703114		At2g46550	expressed protein
A024612_01	2.74363	0.9002	0.328105	1.75258	3.27795		A024612_01	At5g53160	-0.094	0.289	-0.108	0.108	0	0.259	0.398	0.219	-0.073	-1.209	1.084	0.864	0.639	0.729	0.779		0	0.039	0.164378		0.219	-0.0812	0.653355		0.779	0.819	0.169078		At5g53160	expressed protein similar to unknown protein (pir||T02893)
A024620_01	3.74589	0.9966	0.266052	1.90821	0.760034		A024620_01	At4g24690	0	0.392	-0.601	0.572	-0.025	0.577	0.684	0.798	0.531	-0.513	1.541	1.398	1.381	1.435	1.305		0	0.0676	0.452721		0.577	0.4154	0.529134		1.398	1.412	0.0862786		At4g24690	ubiquitin-associated (UBA)/TS-N domain-containing protein / octicosapeptide/Phox/Bemp1 (PB1) domain-containing protein contains Pfam profiles PF00627: Ubiquitin-associated (UBA)/TS-N domain, PF00569: Zinc finger ZZ type domain, PF00564: PB1 domain
A024675_01	3.41992	0.2568	0.0750895	1.19596	1.24313		A024675_01	At4g27780	-0.118	0	-0.272	0.301	0.182	-0.249	-0.17	-0.249	-0.243	-0.336	0.081	0.026	-0.072	-0.103	0.105		0	0.0186	0.229076		-0.249	-0.2494	0.0588328		0.026	0.0074	0.0918983		At4g27780	acyl-CoA binding protein 2 (ACBP2) identical to acyl-CoA binding protein 2 [Arabidopsis thaliana] gi|12039034|gb|AAG46057
A024676_01	5.03911	0.584	0.115894	1.4929	0		A024676_01	At4g04620	-0.223	0.101	0	-0.165	0.234	-0.075	-0.132	-0.078	-0.244	-0.497	0.403	0.406	0.298	0.277	0.51		0	-0.0106	0.187982		-0.132	-0.2052	0.176878		0.403	0.3788	0.0941154		At4g04620	autophagy 8b (APG8b) identical to autophagy 8b [Arabidopsis thaliana] GI:19912153; contains Pfam profile PF02991: Microtubule associated protein 1A/1B, light chain 3
A024781_01	3.0719	0.3144	0.102347	1.23908	1.7537		A024781_01	At1g72650	-0.278	0.018	-0.169	0.246	0	-0.103	-0.119	-0.213	-0.471	-0.332	0.095	0.167	-0.007	0.073	0.006		0	-0.0366	0.199992		-0.213	-0.2476	0.154657		0.073	0.0668	0.0707404		At1g72650	myb family transcription factor contains Pfam PF00249: Myb-like DNA-binding domain
A024799_01	3.11761	0.6844	0.219527	1.57207	1.7537		A024799_01	At3g44320	-0.065	0.037	-0.986	0	0.035	-0.342	-0.312	-0.094	-0.043	-1.038	0.605	0.199	0.201	0.326	0.262		0	-0.1958	0.443657		-0.312	-0.3658	0.397929		0.262	0.3186	0.168387		At3g44320	nitrilase 3 (NIT3) identical to SP|P46010 Nitrilase 3 (EC 3.5.5.1) {Arabidopsis thaliana}
A024872_01	2.54368	0.41	0.161184	1.33351	4.47718		A024872_01	At4g18210	0.033	0.031	-0.185	-0.219	0	-0.435	-0.303	-0.401	-0.238	-0.731	0.091	-0.029	0.272	-0.022	-0.37		0	-0.068	0.123608		-0.401	-0.4216	0.189807		-0.022	-0.0116	0.234423		At4g18210	purine permease family protein similar to purine permease [Arabidopsis thaliana] GI:7620007, contains Pfam profile PF03151: Domain of unknown function, DUF250
A024961_01	2.81633	0.53872	0.191284	1.42047	2.75256		A024961_01	At4g12310	-0.163	0.017	-1.597	0.027	0	-0.606	-0.244	0.025	-0.629		0.021	0.24	-0.037	0.053	0.091		0	-0.3432	0.705171		-0.425	-0.3635	0.31332		0.053	0.0736	0.104182		At4g12310	cytochrome P450, putative similar to P450 monooxygenase GI:14334057 from [Gossypium arboreum ]
A025060_01	9.01104	3.5598	0.395049	10.6158	0		A025060_01	At3g44300	0.01	0	0.85	-0.088	-0.423	1.252	1.343	-0.674	0.837	0.48	4.168	4.085	4.33	4.345	4.109		0	0.0698	0.470349		0.837	0.6476	0.815394		4.168	4.2074	0.122659		At3g44300	nitrilase 2 (NIT2) identical to SP|P32962 Nitrilase 2 (EC 3.5.5.1) {Arabidopsis thaliana}
A025167_01	2.5624	0.5234	0.204262	1.40361	4.47718		A025167_01	At3g14640	0	0.105	-0.621	0.085	-0.115	-0.201	0.033	-0.042	-0.261	-0.935	0.327	0.302	0.275	0.242	0.065		0	-0.1092	0.298954		-0.201	-0.2812	0.384133		0.275	0.2422	0.103975		At3g14640	cytochrome P450, putative similar to GB:Q05047 from [Catharanthus roseus]
A025232_01	2.78684	0.7668	0.275151	1.63528	3.27795		A025232_01	At5g59530	-0.006	0	-0.56	0.113	0.11	-0.518	-0.364	-0.292	-0.143	-1.467	0.494	0.276	0.132	0.042	0.106		0	-0.0686	0.280613		-0.364	-0.5568	0.526424		0.132	0.21	0.180372		At5g59530	2-oxoglutarate-dependent dioxygenase, putative similar to 2A6 (GI:599622) and tomato ethylene synthesis regulatory protein E8 (SP|P10967); 1-aminocyclopropane-1-carboxylate oxidase kidney bean, PIR:T10818
A025980_01	2.44913	0.861	0.351553	1.68418	5.37887		A025980_01	At3g32980	0	0.213	-1.095	-0.164	0.707	-0.536	0.208	0.538	-0.487	-1.204	0.698	0.378	0.276	0.573	0.899		0	-0.0678	0.661089		-0.487	-0.2962	0.683395		0.573	0.5648	0.248897		At3g32980	peroxidase 32 (PER32) (P32) (PRXR3) identical to SP|Q9LHB9 Peroxidase 32 precursor (EC 1.11.1.7) (Atperox P32) (PRXR3) (ATP16a) {Arabidopsis thaliana}
A200033_01	2.65547	0.2022	0.0761447	1.15079	4.47718		A200033_01	At1g73650	0.056	0.101	-0.235	-0.236	0	-0.083	-0.201	-0.204	-0.092	-0.248	-0.038	0.12	0.047	0.114	-0.06		0	-0.0628	0.161662		-0.201	-0.1656	0.0737516		0.047	0.0366	0.0835931		At1g73650	expressed protein
A200110_01	4.17216	0.6722	0.161115	1.59245	0.527996		A200110_01	At4g27410	0.122	0	-0.605	0.122	-0.026	-0.619	-0.526	-0.341	-0.199	-0.733	0.185	-0.167	0.351	0.225	0.349		0	-0.0774	0.302702		-0.526	-0.4836	0.21428		0.225	0.1886	0.212068		At4g27410	no apical meristem (NAM) family protein (RD26) contains Pfam PF02365: No apical meristem (NAM) domain; Arabidopsis thaliana nap gene,PID:e1234813; identical to cDNA RD26 mRNA for NAM-like protein GI:15375403
A200148_01	2.48943	0.3744	0.150396	1.29087	5.37887		A200148_01	At5g23405	0	0.453	0.364	-0.236	-0.005	0.747	0.713	0.648	0.435	0.218	1.03	1.026	0.99	0.951	0.636		0	0.1152	0.285951		0.648	0.5522	0.222714		0.99	0.9266	0.165556		At5g23405	high mobility group (HMG1/2) family protein contains Pfam profile PF00505: HMG (high mobility group) box
A200149_01	2.88092	0.4488	0.155784	1.35285	2.75256		A200149_01	At5g25280	-0.037	0.369	-0.325	0	0.015	-0.113	0.369	0.148	0.464	-0.061	0.481	0.646	0.72	0.753	0.451		0	0.0044	0.246619		0.148	0.1614	0.254755		0.646	0.6102	0.137629		At5g25280	serine-rich protein-related contains some similarity to serine-rich proteins
A200159_01	2.51524	0.495867	0.197145	1.39775	5.37887		A200159_01	At5g39660	0	-0.076	-0.523	0.498	0.832	-0.295	-0.188	-0.626	-0.509		0.136	0.181	-0.349	-0.15	0.059		0	0.1462	0.527414		-0.402	-0.4045	0.199035		0.059	-0.0246	0.221367		At5g39660	Dof-type zinc finger domain-containing protein similar to H-protein promoter binding factor-2a GI:3386546 from [Arabidopsis thaliana]
A200160_01	2.52546	0.4048	0.160287	1.318	4.47718		A200160_01	At5g42080	-0.032	0	-0.473	0.426	0.119	0.065	-0.029	-0.1	0.061	-0.517	0.461	0.3	0.042	0.229	0.472		0	0.008	0.324064		-0.029	-0.104	0.24083		0.3	0.3008	0.17826		At5g42080	GTP-binding protein / phragmoplastin, putative strong similarity to GTP-binding protein [Arabidopsis thaliana] GI:807577, phragmoplastin SDL5A [Glycine max] GI:1218004; contains Pfam profiles PF01031: Dynamin central region, PF00350: Dynamin family
A200218_01	6.1694	1.3426	0.217622	2.49646	0		A200218_01	At1g02470	0.296	0	-0.147	0.473	-0.492	-0.159	-0.233	-0.376	0.187	0.513	1.126	1.453	1.531	1.501	1.034		0	0.026	0.378034		-0.159	-0.0136	0.359916		1.453	1.329	0.2313		At1g02470	expressed protein contains non-consensus splice sites;
A200380_01	2.9249	0.4914	0.168006	1.39005	2.16718		A200380_01	At1g13810	0.216	0.226	0	-0.047	-0.37	0.135	0.156	0.273	0.211	-0.439	0.549	0.387	0.58	0.755	0.522		0	0.005	0.243267		0.156	0.0672	0.28799		0.549	0.5586	0.132202		At1g13810	expressed protein ; expression supported by MPSS
A200385_01	2.56628	0.3036	0.118304	1.23063	4.47718		A200385_01	At1g14340	-0.006	0	-0.956	0.019	0.137	-0.179	0.015	0.079	-0.269	-0.298	0.045	0.319	0.135	0.096	0.271		0	-0.1612	0.4481		-0.179	-0.1304	0.169301		0.135	0.1732	0.116915		At1g14340	RNA recognition motif (RRM)-containing protein
A200400_01	2.51312	0.6	0.238747	1.47511	5.37887		A200400_01	At1g15250	0.021	0	0.05	-0.133	-0.322	0.494	0.446	-0.098	-0.294	-0.442	0.813	0.573	0.376	0.49	0.854		0	-0.0768	0.153967		-0.098	0.0212	0.427817		0.573	0.6212	0.206545		At1g15250	60S ribosomal protein L37 (RPL37A) almost identical to GB:Q43292
A200509_01	3.05329	0.3668	0.120133	1.28846	2.16718		A200509_01	At1g22985	-0.178	0.011	-0.25	0.102	0	-0.136	0.08	0.202	-0.123	-0.133	0.209	0.401	0.323	0.233	0.558		0	-0.063	0.145657		-0.123	-0.022	0.154998		0.323	0.3448	0.141447		At1g22985	AP2 domain-containing transcription factor, putative
A200542_01	3.01084	0.6938	0.230434	1.58311	2.16718		A200542_01	At1g26665	-0.565	0.523	0.806	0	-0.17	0.712	0.678	-0.08	-0.128	0.354	1.2	1.084	0.904	1.151	0.666		0	0.1188	0.547887		0.354	0.3072	0.400895		1.084	1.001	0.218303		At1g26665	expressed protein
A200908_01	2.62711	0.21	0.0799356	1.15541	4.47718		A200908_01	At1g62040	0	0.004	-0.65	-0.255	0.014	0.041	0.242	0.278	0.099	0.119	0.262	0.365	0.42	0.426	0.356		0	-0.1774	0.287395		0.119	0.1558	0.100153		0.365	0.3658	0.0660167		At1g62040	autophagy 8c (APG8c) identical to autophagy 8c [Arabidopsis thaliana] GI:19912155; contains Pfam profile PF02991: Microtubule associated protein 1A/1B, light chain 3
A200982_01	3.22639	0.9822	0.304426	1.93776	1.47491		A200982_01	At1g67980	0.295	0	1.067	-0.245	-0.756	2.262	2.226	2.625	3.187	3.262	3.409	3.771	4.206	3.842	3.245		0	0.0722	0.676574		2.625	2.7124	0.493556		3.771	3.6946	0.378418		At1g67980	caffeoyl-CoA 3-O-methyltransferase, putative similar to GI:2960356 [Populus balsamifera subsp. trichocarpa], GI:684942 [Medicago sativa subsp. sativa]
A201082_01	3.42235	0.36984	0.108066	1.29247	1.24313		A201082_01	At1g79190	-0.56	0.063	0.033	0	-0.216	0.072	0.014	-0.024	0.008		0.505	0.313	0.141	0.369	0.333		0	-0.136	0.261168		0.011	0.0175	0.0399792		0.333	0.3322	0.130519		At1g79190	expressed protein
A201084_01	2.9411	0.5436	0.184829	1.45748	2.16718		A201084_01	At1g79520	0	0.2	0.793	-0.12	-0.403	-0.524	-0.664	-0.622	-1.108	-0.466	-0.262	-0.062	0.009	0.141	-0.492		0	0.094	0.447627		-0.622	-0.6768	0.253419		-0.062	-0.1332	0.247893		At1g79520	cation efflux family protein contains cation efflux family protein domain, Pfam:PF01545
A201140_01	3.67581	0.2564	0.0697533	1.19354	0.760034		A201140_01	At2g06010	0.014	0	0.364	-0.14	-0.089	-0.072	-0.04	-0.159	-0.244	-0.178	0.058	0.156	0.081	0.182	0.112		0	0.0298	0.19734		-0.159	-0.1386	0.0825155		0.112	0.1178	0.0513439		At2g06010	expressed protein
A201287_01	5.27255	0.6562	0.124456	1.56489	0		A201287_01	At2g16595		0	0.315	-0.246		0.353	0.563	0.456	0.812	0.804	1.234	1.37	1.159	1.243	1.263		0	0.023	0.281206		0.563	0.5976	0.20594		1.243	1.2538	0.0759651		At2g16595	translocon-associated protein (TRAP), putative similar to Swiss-Prot:P45434 translocon-associated protein, alpha subunit precursor (TRAP-alpha, Signal sequence receptor alpha subunit, SSR-alpha) [Arabidopsis thaliana]
A201410_01	5.04946	0.5918	0.117201	1.50974	0		A201410_01	At2g31200	0	0.228	0.696	-0.388	-0.487	0.741	0.824	0.889	1.074	0.972	1.387	1.432	1.767	1.403	1.47		0	0.0098	0.480529		0.889	0.9	0.129072		1.432	1.4918	0.157047		At2g31200	actin-depolymerizing factor 6 (ADF6) identical to SP|Q9ZSK2 Actin-depolymerizing factor 6 (ADF-6) (AtADF6) {Arabidopsis thaliana}
A201468_01	2.76808	0.222	0.0802001	1.16547	3.27795		A201468_01	At2g36835	0	-0.019	-0.506	0.057	0.156	-0.071	0.125	0.094	-0.081	0.07	0.212	0.2	0.258	0.205	0.372		0	-0.0624	0.257154		0.07	0.0274	0.0964484		0.212	0.2494	0.0723104		At2g36835	expressed protein
A201494_01	3.36388	0.6252	0.185857	1.53006	1.47491		A201494_01	At2g39705	-0.379	0.142	-0.03	0	0.009	-0.979	-0.628	-0.417	-1.163	-0.809	-0.362	-0.143	-0.357	-0.148	0.14		0	-0.0516	0.194598		-0.809	-0.7992	0.291617		-0.148	-0.174	0.205588		At2g39705	expressed protein
A201585_01	2.64012	0.2522	0.0955261	1.18917	4.47718		A201585_01	At3g05935	0.084	0	-0.054	-0.04	0.232	-0.313	-0.329	-0.141	-0.496	-0.352	-0.071	-0.131	0.043	-0.186	-0.025		0	0.0444	0.117834		-0.329	-0.3262	0.12647		-0.071	-0.074	0.0892917		At3g05935	expressed protein
A202027_01	2.93436	0.7056	0.240461	1.58079	2.16718		A202027_01	At3g61890	0	0.18	0.124	-0.186	-0.387	-1.399	-1.187	-0.66	-1.685	-1.733	-0.682	-0.501	-0.697	-0.372	-0.884		0	-0.0538	0.233275		-1.399	-1.3328	0.436608		-0.682	-0.6272	0.196771		At3g61890	homeobox-leucine zipper protein 12 (HB-12) / HD-ZIP transcription factor 12 identical to homeobox-leucine zipper protein ATHB-12 (GI:6899887) [Arabidopsis thaliana]
A202078_01	3.65244	0.6448	0.176539	1.56096	1.02009		A202078_01	At4g02715	-0.3	0	-1.047	0.25	0.415	-0.418	-0.731	-0.649	-0.769		0.16	0.126	-0.326	-0.115	-0.292		0	-0.1364	0.576175		-0.69	-0.64175	0.157348		-0.115	-0.0894	0.22709		At4g02715	expressed protein
A202131_01	3.09028	0.2764	0.0894418	1.21227	1.7537		A202131_01	At4g06599	-0.019	0	-0.047	0.136	0.281	-0.031	-0.041	-0.155	0.025	-0.178	0.192	0.259	0.204	0.024	0.323		0	0.0702	0.137283		-0.041	-0.076	0.086741		0.204	0.2004	0.111428		At4g06599	ubiquitin family protein contains Pfam domian PF00240: Ubiquitin family
A202715_01	2.66049	0.2972	0.111709	1.2235	4.47718		A202715_01	At5g19850	0.105	0	-0.186	-0.001	0.366	-0.876	-0.893	-0.94	-0.736	-0.521	-0.544	-0.456	-0.475	-0.616	-0.389		0	0.0568	0.202143		-0.876	-0.7932	0.170096		-0.475	-0.496	0.0868821		At5g19850	hydrolase, alpha/beta fold family protein low similarity to hydrolase [Terrabacter sp. DBF63] GI:14196240; contains Pfam profile PF00561: hydrolase, alpha/beta fold family
A202745_01	3.79607	0.2668	0.0702832	1.20422	0.760034		A202745_01	At5g20300	-0.308	0	-0.472	0.236	0.023	-0.446	-0.39	-0.325	-0.34	-0.403	-0.081	-0.265	-0.067	-0.063	-0.094		0	-0.1042	0.282659		-0.39	-0.3808	0.0490071		-0.081	-0.114	0.0852936		At5g20300	chloroplast outer membrane protein, putative similar to chloroplast protein import component Toc159 [Pisum sativum] GI:8489806, chloroplast outer envelope protein 86 [Pisum sativum] GI:599958, GTP-binding protein [Pisum sativum] GI:576509
A202750_01	4.30768	0.4608	0.106972	1.37489	0.21257		A202750_01	At5g20380	-0.003	0.097	-0.131	0.017	0	-0.457	-0.315	-0.275	-0.344	-0.618	0.22	-0.093	0.003	0.092	0.073		0	-0.004	0.0818352		-0.344	-0.4018	0.138512		0.073	0.059	0.115592		At5g20380	transporter-related low similarity to vesicular glutamate transporter 3 [Rattus norvegicus] GI:21685382
A202756_01	2.96911	0.4396	0.148058	1.35908	2.16718		A202756_01	At5g20460	-0.02	0.439	1.09	0	-0.773	0.632	0.384	0.725	0.598	0.864	1.006	1.119	1.211	1.3	0.765		0	0.1472	0.683815		0.632	0.6406	0.176609		1.119	1.0802	0.207233		At5g20460	hypothetical protein
A202833_01	3.27748	0.4952	0.151092	1.39137	1.47491		A202833_01	At5g24870	-0.159	0	-0.485	0.257	0.327	-0.615	-0.441	-0.378	-0.594	-1.076	-0.145	-0.075	-0.15	-0.195	-0.063		0	-0.012	0.328924		-0.594	-0.6208	0.273514		-0.145	-0.1256	0.0553787		At5g24870	zinc finger (C3HC4-type RING finger) family protein similar to Pfam domain, PF00097: Zinc finger, C3HC4 type (RING finger)
A202864_01	3.29872	0.7216	0.218752	1.62799	1.47491		A202864_01	At5g25350	-0.188	0.019	-0.707	0.177	0	-0.285	-0.405	-0.347	-0.538	-1.179	0.312	0.227	-0.07	-0.063	0.448		0	-0.1398	0.342477		-0.405	-0.5508	0.363401		0.227	0.1708	0.230534		At5g25350	F-box family protein contains Pfam PF00646: F-box domain and Pfam PF00560: Leucine Rich Repeat (6 copies); similar to F-box protein FBL6 (GI:4432860) [Homo sapiens]
A202865_01	2.48642	0.3748	0.150739	1.28144	5.37887		A202865_01	At5g25360	-0.079	0.011	0	-0.231	0.079	-0.264	-0.343	-0.344	-0.403	-0.929	0.015	-0.148	-0.13	-0.122	-0.024		0	-0.044	0.118621		-0.344	-0.4566	0.26866		-0.122	-0.0818	0.0725134		At5g25360	expressed protein
A202894_01	4.86328	0.6626	0.136245	1.57767	0.21257		A202894_01	At5g25770	0.183	0.078	-0.021	0	-0.059	0.391	0.287	0.18	0.281	-0.129	0.824	1.08	0.679	0.867	0.873		0	0.0362	0.0961025		0.281	0.202	0.199519		0.867	0.8646	0.143674		At5g25770	expressed protein
A202946_01	3.15522	0.3168	0.100405	1.24743	1.7537		A202946_01	At5g27320	-0.261	0.042	0.047	0	-0.011	-0.498	-0.49	-0.45	-0.473	-0.261	-0.289	-0.09	-0.097	0.072	-0.184		0	-0.0366	0.127982		-0.473	-0.4344	0.0986626		-0.097	-0.1176	0.133155		At5g27320	expressed protein similar to PrMC3 [Pinus radiata] GI:5487873
A203319_01	3.34181	0.406	0.121491	1.32655	1.47491		A203319_01	At5g52470	0	0.016	0.466	-0.123	-0.265	0.339	0.382	0.184	0.344	0.048	0.696	0.444	0.752	0.858	0.577		0	0.0188	0.274317		0.339	0.2594	0.140445		0.696	0.6654	0.159971		At5g52470	fibrillarin 1 (FBR1) (FIB1) (SKIP7) identical to fibrillarin 1 GI:9965653 from [Arabidopsis thaliana]; C-terminus identical to SKP1 interacting partner 7 GI:10716959 from [Arabidopsis thaliana]; contains Pfam domain PF01269: Fibrillarin
A203384_01	2.50222	0.5782	0.231075	1.45733	5.37887		A203384_01	At5g60540	-0.106	0.165	-0.616	0.063	0	0.096	0.179	-0.094	-0.268	-0.873	0.585	0.584	0.183	0.276	0.303		0	-0.0988	0.305401		-0.094	-0.192	0.418248		0.303	0.3862	0.186415		At5g60540	SNO glutamine amidotransferase family protein similar to pyridoxine synthesis protein PDX2 [Cercospora nicotianae] GI:9954418; contains Pfam profile PF01174: SNO glutamine amidotransferase family
At30000007	5.14348	0.5656	0.109964	1.47438	0		At30000007	At1g01070	-0.072	0.011	0	0.046	-0.587	0.022	-0.057	0.252	0.189	-0.142	0.626	0.645	0.665	0.689	0.467		0	-0.1204	0.264343		0.022	0.0528	0.165214		0.645	0.6184	0.0878112		At1g01070	nodulin MtN21 family protein similar to MtN21 GI:2598575 (root nodule development) from [Medicago truncatula]
At30000209	2.67821	1.0134	0.378387	1.88941	3.27795		At30000209	At1g02850	0	-0.095	0.883	0.021	-1.128	1.307	0.882	-0.621	0.516	0.556	1.372	1.749	1.337	1.238	2.011		0	-0.0638	0.714351		0.556	0.528	0.716465		1.372	1.5414	0.326401		At1g02850	glycosyl hydrolase family 1 protein contains Pfam PF00232 : Glycosyl hydrolase family 1 domain; TIGRFAM TIGR01233: 6-phospho-beta-galactosidase; similar to hydroxyisourate hydrolase (GI:19569603) [Glycine max]
At30000328	2.51414	1.1466	0.456061	1.95196	5.37887		At30000328	At1g03850	-0.001	0	0.412	-1.173	0.793	0.429	-0.328	-0.453	0.195	1.707	1.066	1.014	1.59	1.567	2.046		0	0.0062	0.737281		0.195	0.31	0.861424		1.567	1.4566	0.425981		At1g03850	glutaredoxin family protein contains INTERPRO Domain IPR002109, Glutaredoxin (thioltransferase)
At30000647	2.48989	0.1812	0.0727744	1.13336	5.37887		At30000647	At1g06640	0.065	0.05	-0.094	-0.061	0	-0.146	0.004	0.055	-0.057	-0.102	0.071	0.216	0.143	0.061	0.169		0	-0.008	0.0688513		-0.057	-0.0492	0.0804779		0.143	0.132	0.0657799		At1g06640	2-oxoglutarate-dependent dioxygenase, putative similar to 2A6 (GI:599622) and tomato ethylene synthesis regulatory protein E8 (SP|P10967); contains Pfam profile: PF00671 Iron/Ascorbate oxidoreductase family
At30000987	3.64542	0.58136	0.159477	1.4793	1.02009		At30000987	At1g09480	-0.036	0	-0.656	0.105	1.318	-0.528	-0.353	-0.272	-0.356		0.05	0.2	0.155	0.119	-0.085		0	0.1462	0.71988		-0.355	-0.37725	0.107769		0.119	0.0878	0.111093		At1g09480	cinnamyl-alcohol dehydrogenase family / CAD family similar to cinnamyl alcohol dehydrogenase, Eucalyptus gunnii [gi:1143445], CPRD14 protein, Vigna unguiculata [gi:1854445]
At30000990	2.81624	1.3276	0.471409	2.38985	2.75256		At30000990	At1g09500	0.493	-0.656	1.384		-0.493	-0.121	-0.962	-2.024	-0.054	-1.15	0.145	0.027	0.06	0.747	1.348		0	0.182	0.948577		-0.962	-0.8622	0.813193		0.145	0.4654	0.573908		At1g09500	cinnamyl-alcohol dehydrogenase family / CAD family similar to cinnamyl alcohol dehydrogenase, Eucalyptus gunnii [gi:1143445], CPRD14 protein, Vigna unguiculata [gi:1854445]
At30001243	2.6905	0.2864	0.106449	1.21573	3.27795		At30001243	At1g11650	0.08	-0.007	-0.617	0	0.028	-0.173	-0.156	-0.072	-0.012	-0.423	0.21	0.11	0.041	0.205	0.03		0	-0.1032	0.289254		-0.156	-0.1672	0.157117		0.11	0.1192	0.0862595		At1g11650	RNA-binding protein 45 (RBP45), putative similar to gb|U90212 DNA binding protein ACBF from Nicotiana tabacum and contains 3 PF|00076 RNA recognition motif domains. ESTs gb|T44278, gb|R65195, gb|N65904, gb|H37499, gb|R90487, gb|N95952, gb|T44278, gb|Z2016
At30001244	3.09694	0.297	0.095901	1.22663	1.7537		At30001244	At1g11650	0.037	-0.061	-0.878	0.03	0	-0.218	-0.249	-0.205	-0.107	-0.456	0.176	0.022	-0.054	0.095	0.011		0	-0.1744	0.395221		-0.218	-0.247	0.128345		0.022	0.05	0.0880653		At1g11650	RNA-binding protein 45 (RBP45), putative similar to gb|U90212 DNA binding protein ACBF from Nicotiana tabacum and contains 3 PF|00076 RNA recognition motif domains. ESTs gb|T44278, gb|R65195, gb|N65904, gb|H37499, gb|R90487, gb|N95952, gb|T44278, gb|Z2016
At30001332	2.98329	0.281	0.0941912	1.21227	2.16718		At30001332	At1g12390	0.072	-0.001	-0.076	0	0.19	-0.06	-0.056	-0.11	-0.187	-0.376	0.182	0.102	0.182	0.006	0.144		0	0.037	0.10027		-0.11	-0.1578	0.132926		0.144	0.1232	0.0733703		At1g12390	cornichon family protein contains Pfam profile: PF03311 cornichon protein
At30001371	2.48614	0.7542	0.303362	1.61614	5.37887		At30001371	At1g12780	-0.228	0.44	-0.222	0	0.227	0.471	0.506	0.405	0.231	-0.858	1.108	1.192	0.747	0.825	0.654		0	0.0434	0.29025		0.405	0.151	0.573895		0.825	0.9052	0.233422		At1g12780	UDP-glucose 4-epimerase / UDP-galactose 4-epimerase / Galactowaldenase identical to SP|Q42605 [GB:CAA90941] from [Arabidopsis thaliana] (Arch. Biochem. Biophys. 327 (1), 27-34 (1996))
At30001496	3.78353	0.54864	0.145007	1.47765	0.760034		At30001496	At1g13960	-0.061	0.259	-1.366		0.061	-0.219	-0.216	-0.007	-0.079		0.412	0.658	0.087	0.654	0.258		0	-0.27675	0.738042		-0.148	-0.13025	0.104955		0.412	0.4138	0.249201		At1g13960	WRKY family transcription factor similar to WKRY DNA-binding protein GB:AAD17441
At30001661	3.32728	0.6014	0.180748	1.4926	1.47491		At30001661	At1g15350	0	-0.1	-0.895	0.118	0.175	-0.484	-0.519	-0.117	-0.259	-0.965	0.259	0.04	-0.032	0.188	0.208		0	-0.1404	0.435033		-0.484	-0.4688	0.322779		0.188	0.1326	0.122881		At1g15350	expressed protein
At30001662	3.72802	0.5516	0.147961	1.45782	0.760034		At30001662	At1g15350	-0.086	0	-0.647	0.152	0.259	-0.191	-0.351	-0.158	-0.099	-0.667	0.389	0.18	0.165	0.115	0.443		0	-0.0644	0.351942		-0.191	-0.2932	0.228858		0.18	0.2584	0.147112		At1g15350	expressed protein
At30002189	3.8361	0.6332	0.165064	1.54525	0.534461		At30002189	At1g20280	-0.031	0	-0.355	0.358	0.308	-0.368	0.029	0.222	-0.235	-0.238	0.691	0.556	0.359	0.263	0.707		0	0.056	0.289108		-0.235	-0.118	0.238641		0.556	0.5152	0.198344		At1g20280	homeobox-leucine zipper protein-related similar to SP|Q02283 Homeobox-leucine zipper protein HAT5 (HD-ZIP protein 5) (HD-ZIP protein ATHB-1) {Arabidopsis thaliana}
At30002228	2.52676	0.5412	0.214187	1.44207	4.47718		At30002228	At1g20620	0	0.084	-0.272	0.41	-0.05	0.892	0.936	0.692	0.344	0.176	1.252	1.442	0.856	0.915	1.281		0	0.0344	0.247852		0.692	0.608	0.336012		1.252	1.1492	0.252233		At1g20620	catalase 3 (SEN2) almost identical to catalase 3 SP:Q42547, GI:3123188 from [Arabidopsis thaliana]; identical to catalase 3 (SEN2) mRNA, partial cds GI:3158369
At30002312	3.62838	0.5492	0.151362	1.48204	1.02009		At30002312	At1g21410	0	0.249	0.536	-0.047	-0.103	-0.603	-0.495	-0.5	-0.664	-0.533	-0.013	-0.115	0.165	0.309	-0.395		0	0.127	0.265269		-0.533	-0.559	0.0728251		-0.013	-0.0098	0.270021		At1g21410	F-box family protein similar to SKP1 interacting partner 2 (SKIP2) TIGR_Ath1:At5g67250
At30002693	2.60112	0.3488	0.134096	1.27709	4.47718		At30002693	At1g25054	-0.073	0	-0.141	0.225	0.209	0.133	0.172	-0.041	0.333	0.31	0.403	0.495	0.446	0.446	0.861		0	0.044	0.165708		0.172	0.1814	0.151173		0.446	0.5302	0.187768		At1g25054	UDP-3-O-acyl N-acetylglycosamine deacetylase family protein contains Pfam domain PF03331: UDP-3-O-acyl N-acetylglycosamine deacetylase
At30002798	3.33938	0.7514	0.225012	1.65587	1.47491		At30002798	At1g26665	-0.412	0.629	0.8	0	-0.078	0.831	0.722	0.061	0.022	0.276	1.369	1.207	0.95	1.323	0.82		0	0.1878	0.508705		0.276	0.3824	0.374525		1.207	1.1338	0.239127		At1g26665	expressed protein
At30002799	2.99018	0.724	0.242126	1.6061	2.16718		At30002799	At1g26665	-0.422	0.573	0.876	0	-0.104	0.906	0.771	-0.029	-0.018	0.532	1.342	1.253	0.999	1.307	0.881		0	0.1846	0.527783		0.532	0.4324	0.437212		1.253	1.1564	0.204377		At1g26665	expressed protein
At30002990	2.57894	0.4812	0.186588	1.3881	4.47718		At30002990	At1g28330	-0.454	0.336	0.541	0	-0.05	0.891	1.026	0.781	0.542	0.321	1.382	1.084	0.88	1.202	1.419		0	0.0746	0.382873		0.781	0.7122	0.281593		1.202	1.1934	0.22177		At1g28330	dormancy-associated protein, putative (DRM1) identical to dormancy-associated protein [Arabidopsis thaliana] GI:2995990; similar to dormancy-associated protein GI:2605887 from [Pisum sativum]; contains Pfam profile PF05564: Dormancy/auxin associated prote
At30003025	4.62889	0.69704	0.150585	1.61863	0.21257		At30003025	At1g28580		0.519	-0.972	0.045	-0.045	0.024	0.269	0.475	0.424		0.875	1.103	1.042	1.065	0.651		0	-0.11325	0.62367		0.346	0.298	0.202585		1.042	0.9472	0.18714		At1g28580	GDSL-motif lipase, putative similar to lipase [Arabidopsis thaliana] GI:1145627; contains InterPro Entry IPR001087 Lipolytic enzyme, G-D-S-L family
At30003430	3.29215	0.376	0.114211	1.30121	1.47491		At30003430	At1g32650	-0.107	0.02	0.115	0	-0.065	-0.249	-0.003	-0.044	-0.02	-0.184	0.282	0.342	0.297	0.45	0.009		0	-0.0074	0.0851839		-0.044	-0.1	0.109775		0.297	0.276	0.163094		At1g32650	hypothetical protein
At30003482	2.52658	0.2402	0.0950693	1.18501	4.47718		At30003482	At1g33135	0	0.085	0.344	-0.334	-0.025	-0.19	-0.214	-0.094	-0.248	-0.156	-0.074	0.131	0.263	0.047	-0.068		0	0.014	0.243291		-0.19	-0.1804	0.0588456		0.047	0.0598	0.14209		At1g33135	hypothetical protein
At30004215	4.27508	0.667	0.15602	1.56633	0.21257		At30004215	At1g49470	-0.348	0	0.049	0.123	-0.625	-0.216	-0.12	0.067	0.027	0.499	0.565	0.775	0.793	0.698	0.761		0	-0.1602	0.316599		0.027	0.0514	0.274802		0.761	0.7184	0.0929129		At1g49470	expressed protein contains Pfam profile PF04819: Family of unknown function (DUF716) (Plant viral-response family)
At30004573	5.23562	0.5144	0.0982501	1.43132	0		At30004573	At1g52855	-0.023	0.046	0	-0.026	0.201	-0.443	-0.29	-0.401	-0.525	-0.356	-0.003	0.328	0.036	0.043	0.153		0	0.0396	0.0947117		-0.401	-0.403	0.0886933		0.043	0.1114	0.134255		At1g52855	expressed protein
At30004772	2.53752	1.45468	0.573267	2.24537	4.47718		At30004772	At1g54575	-0.176	-1.015	0.2	0.176		0.883		-1.829	1.207	-0.125	1.617	1.752	1.086	1.47	1.798		0	-0.20375	0.567486		0.379	0.034	1.36538		1.617	1.5446	0.286508		At1g54575	expressed protein
At30004824	3.09989	0.6394	0.206265	1.53005	1.7537		At30004824	At1g55060	-0.138	0.028	-0.681	0.256	0	-0.243	-0.156	-0.353	-0.547	-1.069	0.157	0.38	-0.101	0.184	0.209		0	-0.107	0.350671		-0.353	-0.4736	0.363483		0.184	0.1658	0.172727		At1g55060	polyubiquitin (UBQ12) identical to polyubiquitin (ubq12) gene sequence GI:304121 from [Arabidopsis thaliana]
At30005243	3.55441	0.4104	0.115462	1.33402	1.02009		At30005243	At1g60730	-0.068	0	-0.125	0.062	0.131	-0.12	-0.35	-0.225	-0.086	-0.191	0.143	0.228	0.194	0.026	0.489		0	0	0.101555		-0.191	-0.1944	0.103011		0.194	0.216	0.170723		At1g60730	aldo/keto reductase family protein contains Pfam profile PF00248: oxidoreductase, aldo/keto reductase family
At30005244	2.51153	0.7786	0.310011	1.59085	5.37887		At30005244	At1g60730	-0.337	0.036	0.491	0	-0.46	0.706	0.515	0.59	1.444	1.931	1.752	1.696	2.023	1.832	1.776		0	-0.054	0.371808		0.706	1.0372	0.62184		1.776	1.8158	0.125699		At1g60730	aldo/keto reductase family protein contains Pfam profile PF00248: oxidoreductase, aldo/keto reductase family
At30005245	5.48601	1.2916	0.235435	2.46621	0		At30005245	At1g60740	-0.744	0.465	0	0.114	-0.236	0.751	1.363	1.225	0.643	1.041	2.837	2.456	1.958	2.156	2.074		0	-0.0802	0.448969		1.041	1.0046	0.30554		2.156	2.2962	0.354051		At1g60740	peroxiredoxin type 2, putative strong similarity to type 2 peroxiredoxin [Brassica rapa subsp. pekinensis] GI:4928472; contains Pfam profile: PF00578 AhpC/TSA (alkyl hydroperoxide reductase and thiol-specific antioxidant) family
At30005297	4.30583	0.5992	0.13916	1.50787	0.21257		At30005297	At1g61200	-0.239	0	-0.743	0.4	0.288	-0.319	-0.049	0.125	-0.21	-0.391	0.513	0.442	0.257	0.328	0.612		0	-0.0588	0.456844		-0.21	-0.1688	0.208747		0.442	0.4304	0.141853		At1g61200	homeobox-leucine zipper protein-related similar to SP|Q02283 Homeobox-leucine zipper protein HAT5 (HD-ZIP protein 5) (HD-ZIP protein ATHB-1) {Arabidopsis thaliana}
At30005754	3.84366	0.438	0.113954	1.34881	0.534461		At30005754	At1g65350	-0.19	0	-0.478	0.155	0.097	-0.15	-0.223	-0.529	-0.286	-0.525	0.153	0.14	-0.05	0.074	0.16		0	-0.0832	0.256616		-0.286	-0.3426	0.175084		0.14	0.0954	0.0881465		At1g65350	polyubiquitin, putative similar to polyubiquitin GI:248337 from [Zea mays]
At30006039	4.12852	1.3414	0.324911	2.51054	0.527996		At30006039	At1g67980	0.247	0	0.337	-0.614	-0.998	2.514	1.929	2.414	2.994	1.762	3.593	3.806	4.218	3.733	2.97		0	-0.2056	0.577975		2.414	2.3226	0.491162		3.733	3.664	0.45236		At1g67980	caffeoyl-CoA 3-O-methyltransferase, putative similar to GI:2960356 [Populus balsamifera subsp. trichocarpa], GI:684942 [Medicago sativa subsp. sativa]
At30006040	3.71593	1.2138	0.326648	2.29109	0.760034		At30006040	At1g67980	0.275	0	0.953	-0.494	-0.602	2.985	2.089	2.317	2.899	1.828	3.53	3.851	4.186	3.636	2.984		0	0.0264	0.629839		2.317	2.4236	0.504786		3.636	3.6374	0.443017		At1g67980	caffeoyl-CoA 3-O-methyltransferase, putative similar to GI:2960356 [Populus balsamifera subsp. trichocarpa], GI:684942 [Medicago sativa subsp. sativa]
At30006361	3.05554	0.531	0.173783	1.43607	2.16718		At30006361	At1g70810	0.045	-0.087	0.035	-0.035		0.652	0.721	0.663	1.278	0.897	1.284	1.684	1.423	1.325	1.15		0	-0.0105	0.0621906		0.721	0.8422	0.262632		1.325	1.3732	0.199484		At1g70810	C2 domain-containing protein similar to zinc finger and C2 domain protein GI:9957238 from [Arabidopsis thaliana]
At30006467	2.57156	0.2318	0.0901397	1.17124	4.47718		At30006467	At1g71860	0.013	-0.121	0.007	-0.271	0	-0.23	-0.239	-0.132	-0.122	-0.448	-0.073	0.022	0.02	0.066	-0.047		0	-0.0744	0.123109		-0.23	-0.2342	0.131134		0.02	-0.0024	0.0564562		At1g71860	protein tyrosine phosphatase 1 (PTP1) identical to protein tyrosine phosphatase 1 GI:3170531 from [Arabidopsis thaliana]; contains Pfam profile: PF00102 protein-tyrosine phosphatase
At30006698	2.60622	0.4974	0.190851	1.38765	4.47718		At30006698	At1g73950	0	0.097	-0.458	0.084	-0.038	-0.076	-0.065	-0.269	-0.367	-0.901	0.288	0.296	0.09	0.165	-0.03		0	-0.063	0.227941		-0.269	-0.3356	0.341217		0.165	0.1618	0.13774		At1g73950	zinc finger (C3HC4-type RING finger) family protein contains Pfam profile: PF00097 zinc finger, C3HC4 type
At30006801	2.58219	0.247	0.0956551	1.18462	4.47718		At30006801	At1g74910	-0.09	-0.078	0.218	0	0.092	-0.306	-0.244	-0.137	-0.296	-0.494	-0.03	-0.09	-0.071	-0.138	0.087		0	0.0284	0.128588		-0.296	-0.2954	0.129699		-0.071	-0.0484	0.0850606		At1g74910	ADP-glucose pyrophosphorylase family protein contains Pfam profile PF00483: Nucleotidyl transferase; low similarity to mannose-1-phosphate guanylyltransferase [Hypocrea jecorina] GI:3323397
At30007048	4.64955	1.4406	0.309836	2.66211	0.21257		At30007048	At1g77145	-0.017	0	0.397	0.396	-0.638	-0.157	0.569	0.546	-0.231	0.912	2.118	1.714	1.892	1.998	1.12		0	0.0276	0.423659		0.546	0.3278	0.49859		1.892	1.7684	0.391662		At1g77145	expressed protein contains Pfam profile PF04720: Protein of unknown function (DUF506)
At30007499	2.49126	0.5052	0.202789	1.39498	5.37887		At30007499	At2g01100	-0.112	0.469	-0.411	0	0.247	0.062	0.35	0.179	0.072	-0.591	0.562	0.372	0.323	0.629	0.712		0	0.0386	0.337263		0.072	0.0144	0.357706		0.562	0.5196	0.166749		At2g01100	expressed protein
At30007637	2.89412	0.6748	0.233162	1.54695	2.75256		At30007637	At2g02390	0.468	0.235	-0.609	-0.064	0	0.315	0.293	0.417	0.554	-0.58	0.766	0.85	0.965	0.77	1.022		0	0.006	0.402817		0.315	0.1998	0.447962		0.85	0.8746	0.115368		At2g02390	glutathione S-transferase zeta 1 (GSTZ1) (GST18) identical to SP|Q9ZVQ3|GTZ1_ARATH Glutathione S-transferase zeta-class 1 (EC 2.5.1.18) (AtGSTZ1) (Maleylacetone isomerase) (EC 5.2.1.-) (MAI) {Arabidopsis thaliana}; contains Pfam profiles PF02798: Glutathi
At30007788	2.77434	0.42432	0.152944	1.32728	3.27795		At30007788	At2g03890	-0.047	0.047	-0.912	0.555		-0.193	-0.022	0.309	-0.377		0.431	0.199	0.321	0.233	0.449		0	-0.08925	0.608913		-0.108	-0.07075	0.291731		0.321	0.3266	0.112866		At2g03890	phosphatidylinositol 3- and 4-kinase family protein low similarity to phosphatidylinositol 4-kinase type-II beta [Homo sapiens] GI:20159767; contains Pfam profile PF00454: Phosphatidylinositol 3- and 4-kinase
At30008653	3.73433	1.3844	0.370722	2.36567	0.760034		At30008653	At2g18050	-0.719	0.194	0	0.392	-0.895	0.065	0.609	0.198	-0.667	-1.301	1.088	1.246	1.037	1.338	1.117		0	-0.2056	0.569633		0.065	-0.2192	0.76019		1.117	1.1652	0.123599		At2g18050	histone H1-3 (HIS1-3) similar to histone H1 [Lycopersicon pennellii] SWISS-PROT:P40267; identical to cDNA histone H1-3 (His1-3) GI:1809314, histone H1-3 [Arabidopsis thaliana] GI:1809305
At30008654	2.87391	1.1824	0.411426	2.02473	2.75256		At30008654	At2g18050	-0.467	0.365	0	0.566	-0.676	0.524	0.903	0.458	-0.531	-1.116	1.207	1.48	1.038	1.371	1.054		0	-0.0424	0.529069		0.458	0.0476	0.839023		1.207	1.23	0.194133		At2g18050	histone H1-3 (HIS1-3) similar to histone H1 [Lycopersicon pennellii] SWISS-PROT:P40267; identical to cDNA histone H1-3 (His1-3) GI:1809314, histone H1-3 [Arabidopsis thaliana] GI:1809305
At30009056	2.44877	0.3752	0.15322	1.29629	5.37887		At30009056	At2g21620	0	-0.194	-0.737	0.022	0.065	-0.12	-0.161	0.03	0.118	-0.414	0.398	0.409	-0.01	0.122	0.41		0	-0.1688	0.332809		-0.12	-0.1094	0.204144		0.398	0.2658	0.197181		At2g21620	universal stress protein (USP) family protein / responsive to dessication protein (RD2) strong similarity to RD2 protein [Arabidopsis thaliana] GI:15320408; contains Pfam profile PF00582: universal stress protein family; identical to cDNA RD2 GI:15320407
At30009625	2.6362	0.3472	0.131705	1.26633	4.47718		At30009625	At2g26980	0	-0.099	0.482	0.11	-0.176	0.415	0.739	0.503	0.279	0.725	0.741	0.761	1.03	0.965	0.9		0	0.0634	0.257441		0.503	0.5322	0.199146		0.9	0.8794	0.1261		At2g26980	CBL-interacting protein kinase 3 (CIPK3) identical to CBL-interacting protein kinase 3 [Arabidopsis thaliana] gi|9280638|gb|AAF86507
At30010024	2.57244	0.2378	0.0924416	1.18012	4.47718		At30010024	At2g30530	0	0.082	0.041	-0.168	-0.07	-0.038	-0.1	0.08	0.078	0.126	0.241	0.099	0.277	0.414	0.304		0	-0.023	0.0985951		0.078	0.0292	0.0942613		0.277	0.267	0.113993		At2g30530	expressed protein
At30010257	3.17688	0.5722	0.180114	1.49786	1.7537		At30010257	At2g32530	-0.165	0.041	0.215	0	-0.225	-1.161	-0.954	-1.184	-0.937	-1.419	-0.96	-0.309	-0.324	-0.467	-0.734		0	-0.0268	0.17476		-1.161	-1.131	0.197242		-0.467	-0.5588	0.281787		At2g32530	cellulose synthase family protein similar to cellulose synthase catalytic subunit from Arabidopsis thaliana [gi:5230423], cellulose synthase-5 from Zea mays [gi:9622882]
At30010258	3.16957	0.4674	0.147465	1.38263	1.7537		At30010258	At2g32540	-0.202	0.121	-1.236	0.074	0	-1.021	-0.633	-0.51	-0.668		-0.343	0.025	-0.307	-0.182	-0.478		0	-0.2486	0.565599		-0.651	-0.708	0.219392		-0.307	-0.257	0.189662		At2g32540	cellulose synthase family protein similar to cellulose synthase catalytic subunit from Arabidopsis thaliana [gi:5230423], cellulose synthase-5 from Zea mays [gi:9622882]
At30010674	2.68981	0.89	0.330878	1.84766	3.27795		At30010674	At2g36080	-0.359	0.29	0.547		-0.29	0.877	1.044	-0.17	0.457	0.147	1.38	1.107	0.94	1.248	2.13		0	0.047	0.442513		0.457	0.471	0.502299		1.248	1.361	0.459959		At2g36080	DNA-binding protein, putative strong similarity to DNA-binding proteins from [Arabidopsis thaliana] RAV1 GI:3868857, RAV2 GI:3868859; contains Pfam profile PF02362: B3 DNA binding domain
At30010676	2.86697	0.7594	0.264879	1.63063	2.75256		At30010676	At2g36080	0	0.715	1.09	-0.177	-0.032	1.594	1.491	0.345	1.014	0.974	1.723	1.787	1.838	1.693	2.174		0	0.3192	0.552774		1.014	1.0836	0.49721		1.787	1.843	0.193405		At2g36080	DNA-binding protein, putative strong similarity to DNA-binding proteins from [Arabidopsis thaliana] RAV1 GI:3868857, RAV2 GI:3868859; contains Pfam profile PF02362: B3 DNA binding domain
At30010870	2.45577	0.4814	0.196028	1.36554	5.37887		At30010870	At2g37760	0.065	0	0.133	-0.105	-0.015	-0.458	-0.647	-0.863	0.054	-0.212	0.004	-0.086	0.149	0.213	0.001		0	0.0156	0.0893689		-0.458	-0.4252	0.359523		0.004	0.0562	0.121646		At2g37760	aldo/keto reductase family protein similar to chalcone reductase [Sesbania rostrata][GI:2792155], and aldose reductase ALDRXV4 [Xerophyta viscosa][GI:4539944], [Hordeum vulgare][GI:728592]
At30010872	2.6697	0.4556	0.170656	1.34651	3.27795		At30010872	At2g37760	0.028	-0.009	0.099	-0.04	0	-0.423	-0.69	-0.735	-0.005	-0.188	-0.004	-0.036	0.107	0.126	0.044		0	0.0156	0.0525576		-0.423	-0.4082	0.315233		0.044	0.0474	0.0695327		At2g37760	aldo/keto reductase family protein similar to chalcone reductase [Sesbania rostrata][GI:2792155], and aldose reductase ALDRXV4 [Xerophyta viscosa][GI:4539944], [Hordeum vulgare][GI:728592]
At30011547	3.58794	1.073	0.299057	2.06983	1.02009		At30011547	At2g43510	0.065	0	0.634	-0.617	-0.976	0.879	0.709	0.11	1.432	0.981	1.4	2.029	2.254	2.193	1.6		0	-0.1788	0.62841		0.879	0.8222	0.479672		2.029	1.8952	0.376726		At2g43510	trypsin inhibitor, putative similar to SP|P26780 Trypsin inhibitor 2 precursor (MTI-2) {Sinapis alba}
At30012051	2.97388	0.4262	0.143314	1.34826	2.16718		At30012051	At2g47910	0	-0.072	-0.316	0.243	0.608	-0.347	-0.034	-0.11	-0.278	-0.414	0.227	0.127	0.17	-0.075	0.499		0	0.0926	0.350314		-0.278	-0.2366	0.160037		0.17	0.1896	0.207029		At2g47910	expressed protein
At30012052	3.25856	0.4742	0.145524	1.38293	1.47491		At30012052	At2g47910	0	-0.03	-0.903	0.271	0.39	-0.456	-0.094	-0.192	-0.479	-0.616	0.249	0.124	0.002	-0.099	0.258		0	-0.0544	0.506718		-0.456	-0.3674	0.216575		0.124	0.1068	0.155495		At2g47910	expressed protein
At30012094	3.19623	0.3852	0.120517	1.30026	1.7537		At30012094	At3g01060	0	0.034	-0.187	0.103	-0.006	-0.791	-0.825	-0.82	-0.612	-1.126	-0.571	-0.414	-0.3	-0.466	-0.497		0	-0.0112	0.107404		-0.82	-0.8348	0.184845		-0.466	-0.4496	0.10112		At3g01060	expressed protein
At30012380	2.60381	0.323	0.124049	1.24445	4.47718		At30012380	At3g03470	-0.084	0.217	-0.903	0.523	0	-0.4	-0.047	0.054	-0.159	0.079	0.144	0.338	0.249	0.302	0.109		0	-0.0494	0.531714		-0.047	-0.0946	0.194873		0.249	0.2284	0.0990369		At3g03470	cytochrome P450, putative similar to cytochrome P450 89A2 GB:Q42602 [Arabidopsis thaliana]
At30012481	3.65363	0.3456	0.0945908	1.27227	1.02009		At30012481	At3g04350	-0.306	0.003	-0.076	0.029	0	-0.42	-0.322	-0.194	-0.416	-0.359	0.206	-0.059	-0.101	0.022	-0.051		0	-0.07	0.137624		-0.359	-0.3422	0.0924024		-0.051	0.0034	0.121599		At3g04350	expressed protein
At30012507	2.49053	0.412267	0.165534	1.33712	5.37887		At30012507	At3g04590	-0.029	0.029	-0.818	0.354		-0.407	-0.22	-0.253	-0.324		0.151	-0.224	-0.18	0.039	0.37		0	-0.116	0.497426		-0.289	-0.301	0.0829257		0.039	0.0312	0.244403		At3g04590	DNA-binding family protein contains a AT hook motif (DNA binding motifs with a preference for A/T rich regions), Pfam:PF02178
At30012672	4.51745	0.5718	0.126576	1.4888	0.21257		At30012672	At3g05937	-0.062	0	-0.146	0.278	0.06	-0.36	-0.253	-0.009	-0.355	-0.176	0.621	0.247	0.276	0.187	0.375		0	0.026	0.160206		-0.253	-0.2306	0.14561		0.276	0.3412	0.170538		At3g05937	expressed protein no suitable start codon was identified.
At30012894	2.97883	0.6174	0.207263	1.51173	2.16718		At30012894	At3g07760	-0.04	0.23	-0.47	0	0.249	0.204	0.223	0.138	0.061	-0.626	0.759	0.61	0.41	0.45	0.858		0	-0.0062	0.290348		0.138	-2.22045e-17	0.355663		0.61	0.6174	0.193023		At3g07760	expressed protein
At30013200	2.82127	0.3564	0.126326	1.27522	2.75256		At30013200	At3g10770	0	0.039	-0.209	-0.085	0.109	0.214	0.148	-0.062	-0.067	-0.256	0.473	0.493	0.272	0.238	0.283		0	-0.0292	0.12252		-0.062	-0.0046	0.188058		0.283	0.3518	0.121119		At3g10770	expressed protein
At30013201	2.72759	0.3652	0.133891	1.27952	3.27795		At30013201	At3g10770	-0.006	0.193	-0.168	0	0.221	0.157	0.016	0.071	-0.072	-0.406	0.436	0.308	0.167	0.292	0.389		0	0.048	0.160336		0.016	-0.0468	0.217379		0.308	0.3184	0.103128		At3g10770	expressed protein
At30013693	3.00964	0.4334	0.144004	1.34824	2.16718		At30013693	At3g14690	-0.007	-0.062	0	0.186	0.221	-0.088	-0.008	0.045	-0.041	0.399	0.57	0.522	0.323	0.321	0.738		0	0.0676	0.126966		-0.008	0.0614	0.194849		0.522	0.4948	0.176962		At3g14690	cytochrome P450, putative similar to GB:Q05047 from [Catharanthus roseus]
At30014767	2.60014	0.2526	0.0971487	1.18669	4.47718		At30014767	At3g24120	0	0.238	-0.016	-0.032	0.326	0.133	-0.02	0.266	0.109	-0.128	0.36	0.284	0.313	0.278	0.388		0	0.1032	0.166545		0.109	0.072	0.150988		0.313	0.3246	0.0480292		At3g24120	myb family transcription factor contains Pfam profile: PF00249 myb-like DNA-binding domain
At30015201	5.1807	0.542	0.104619	1.44886	0		At30015201	At3g28100	-0.077	0	-0.543	0.075	0.041	-0.607	-0.345	-0.425	-0.573	-0.777	-0.004	-0.03	0.023	-0.068	0.062		0	-0.1008	0.253614		-0.573	-0.5454	0.167967		-0.004	-0.0034	0.0496367		At3g28100	nodulin MtN21 family protein similar to MtN21 [Medicago truncatula] GI:2598575
At30015204	2.63028	0.4378	0.166446	1.33823	4.47718		At30015204	At3g28130	0.087	0.13	-0.436	-0.066	0	-0.564	-0.53	-0.445	-0.732	-1.169	-0.416	-0.162	-0.15	-0.176	-0.347		0	-0.057	0.225098		-0.564	-0.688	0.288395		-0.176	-0.2502	0.122663		At3g28130	nodulin MtN21 family protein similar to MtN21 GI:2598575 (root nodule development) from [Medicago truncatula]
At30015326	3.2132	0.4298	0.133761	1.33745	1.7537		At30015326	At3g29200	0.156	0	-0.006	-0.015	0.142	-0.225	-0.342	-0.446	-0.687	-0.73	0.081	-0.047	-0.13	-0.175	-0.01		0	0.0554	0.0857543		-0.446	-0.486	0.218171		-0.047	-0.0562	0.100751		At3g29200	chorismate mutase, chloroplast (CM1) identical to chorismate mutase GB:Z26519 [SP|P42738] [Arabidopsis thaliana]
At30016161	3.2974	0.3332	0.101049	1.25752	1.47491		At30016161	At3g48320	0	0.077	-0.051	-0.313	0.033	-0.262	0.054	0.091	-0.056	-0.037	0.153	0.329	0.414	0.294	0.266		0	-0.0508	0.153854		-0.037	-0.042	0.13741		0.294	0.2912	0.0951982		At3g48320	cytochrome P450 71A21, putative (CYP71A21) identical to Cytochrome P450 71A21 (SP:Q9STL2) [Arabidopsis thaliana]
At30016439	2.75031	0.4668	0.169726	1.36485	3.27795		At30016439	At3g51000	-0.154	0.005	0.253	-0.372	0	0.233	0.095	0.351	-0.087	-0.395	0.698	0.589	0.403	0.429	0.412		0	-0.0536	0.230092		0.095	0.0394	0.292552		0.429	0.5062	0.13146		At3g51000	epoxide hydrolase, putative similar to epoxide hydrolase [Glycine max] GI:2764806; contains Pfam profile PF00561: hydrolase, alpha/beta fold family
At30016486	3.21492	0.3484	0.10837	1.27265	1.7537		At30016486	At3g51430	0	0.354	-0.513	-0.02	0.231	0.263	0.411	0.55	0.608	0.446	0.618	0.938	0.867	0.74	0.857		0	0.0104	0.332305		0.446	0.4556	0.133523		0.857	0.804	0.125923		At3g51430	strictosidine synthase, putative (YLS2) similar to hemomucin [Drosophila melanogaster][GI:1280434], strictosidine synthase [Rauvolfia serpentina][SP|P15324]; contains strictosidine synthase domain PF03088; identical to cDNA YLS2 mRNA for strictosidine syn
At30016794	2.67085	1.7228	0.645038	3.55618	3.27795		At30016794	At3g53980	1.73	-1.505	1.505	-3.679		-1.498	-3.065	-3.791	-2.806	-2.827	-1.368	-0.892	-2.696	0.366	-0.783		0	-0.48725	2.58897		-2.827	-2.7974	0.828891		-0.892	-1.0746	1.10778		At3g53980	protease inhibitor/seed storage/lipid transfer protein (LTP) family protein contains Pfam protease inhibitor/seed storage/LTP family domain PF00234
At30016839	4.0328	0.3108	0.077068	1.23837	0.534461		At30016839	At3g54380	-0.153	0	0.344	-0.196	0.004	-0.023	0.079	0	-0.017	0.221	0.432	0.354	0.309	0.386	0.333		0	-0.0002	0.212236		0	0.052	0.102932		0.354	0.3628	0.0479239		At3g54380	SAC3/GANP family protein contains Pfam profile: PF03399 SAC3/GANP family
At30016888	2.65188	0.56275	0.212208	1.46413	4.47718		At30016888	At3g54830		-0.032	-0.853	0.409	0.032	-0.275	0.042	0.239	-0.045		0.767	0.184	0.579	0.396	0.215		0	-0.111	0.531556		-0.002	-0.00975	0.213037		0.396	0.4282	0.246805		At3g54830	amino acid transporter family protein belongs to INTERPRO:IPR002422 amino acid/polyamine transporter, family II
At30017041	3.48476	0.5298	0.152033	1.45185	1.24313		At30017041	At3g56170	0	0.133	0.089	-0.191	-0.094	0.076	0.162	0.383	0.101	-0.039	0.681	0.642	0.715	0.975	0.319		0	-0.0126	0.132413		0.101	0.1366	0.155831		0.681	0.6664	0.234036		At3g56170	Ca(2+)-dependent nuclease identical to Ca(2+)-dependent nuclease [Arabidopsis thaliana] GI:7684292; supporting cDNA gi|7684291|dbj|D84226.1|
At30017178	2.87351	0.293	0.101966	1.21989	2.75256		At30017178	At3g57490	0.122	0.031	-0.29	0	-0.357	0.536	0.585	0.201	0.426	0.299	0.68	0.754	0.672	0.641	0.765		0	-0.0988	0.211298		0.426	0.4094	0.160279		0.68	0.7024	0.0542614		At3g57490	40S ribosomal protein S2 (RPS2D) 40S ribosomal protein S2 - Arabidopsis thaliana, SWISSPROT:RS2_ARATH
At30017469	2.57424	0.3934	0.152822	1.30937	4.47718		At30017469	At3g60180	0	0.178	0.622	-0.118	-0.173	0.488	0.65	0.311	0.614	0.906	0.749	1.231	1.07	0.966	0.92		0	0.1018	0.320392		0.614	0.5938	0.219206		0.966	0.9872	0.178885		At3g60180	uridylate kinase, putative / uridine monophosphate kinase, putative / UMP kinase, putative similar to uridylate kinase (EC 2.7.4.-) (UK) (Uridine monophosphate kinase) (UMP kinase) (UMP/CMP kinase) (Swiss-Prot:O04905) [Arabidopsis thaliana]
At30018032	4.14449	0.6292	0.151816	1.52526	0.527996		At30018032	At4g01430		-0.033	-0.164	0.033	0.362	0.533	0.354	-0.048	0.22		0.778	0.846	0.788	0.768	0.897		0	0.0495	0.223843		0.287	0.26475	0.244771		0.788	0.8154	0.0547522		At4g01430	nodulin MtN21 family protein similar to MtN21 GI:2598575 (root nodule development) from [Medicago truncatula]
At30018034	4.48163	0.8326	0.185781	1.75325	0.21257		At30018034	At4g01430		-0.137	0.013	0		1.052	0.815	0.187	0.589	0.535	1.505	1.524	1.389	1.263	1.66		0	-0.0413333	0.0831044		0.589	0.6356	0.323692		1.505	1.4682	0.149695		At4g01430	nodulin MtN21 family protein similar to MtN21 GI:2598575 (root nodule development) from [Medicago truncatula]
At30018371	4.41945	0.6424	0.145357	1.54335	0.21257		At30018371	At4g04620	-0.265	0.325	0	-0.218	0.095	0.017	-0.063	0.034	-0.132	-0.596	0.387	0.514	0.539	0.525	0.507		0	-0.0126	0.240627		-0.063	-0.148	0.259101		0.514	0.4944	0.0612438		At4g04620	autophagy 8b (APG8b) identical to autophagy 8b [Arabidopsis thaliana] GI:19912153; contains Pfam profile PF02991: Microtubule associated protein 1A/1B, light chain 3
At30018467	2.50551	0.3176	0.126761	1.24291	5.37887		At30018467	At4g05460	0	0.243	0.563	-0.186	-0.05	0.421	0.405	0.13	0.406	0.636	0.639	0.8	0.779	0.848	0.52		0	0.114	0.295014		0.406	0.3996	0.17965		0.779	0.7172	0.134895		At4g05460	F-box family protein (FBL20) contains similarity to N7 protein GI:3273101 from [Medicago truncatula]
At30018480	3.26948	0.4614	0.141123	1.36317	1.47491		At30018480	At4g05590	0.15	0.201	-0.124	-0.056	0	0.112	0.642	0.756	0.568	0.47	0.964	0.92	1.064	1.026	0.881		0	0.0342	0.137445		0.568	0.5096	0.245615		0.964	0.971	0.0748732		At4g05590	expressed protein contains Pfam domain, PF03650: Uncharacterized protein family (UPF0041)
At30018722	2.50998	0.6626	0.263986	1.5152	5.37887		At30018722	At4g09760	-0.011	0.044	-0.836	0.253	0	-0.036	0.353	0.439	-0.129	-0.86	0.606	0.797	0.458	0.673	0.546		0	-0.11	0.419661		-0.036	-0.0466	0.515754		0.606	0.616	0.128427		At4g09760	choline kinase, putative similar to GmCK2p choline kinase gi|1438881|gb|AAC49375
At30019140	3.80915	0.2934	0.0770251	1.22367	0.760034		At30019140	At4g13530	-0.06	-0.02	0.277	0	0.044	-0.194	0.04	0.056	-0.089	-0.054	0.264	0.274	0.232	0.291	0.165		0	0.0482	0.133275		-0.054	-0.0482	0.101972		0.264	0.2452	0.0497162		At4g13530	expressed protein predicted protein, Arabidopsis thaliana
At30019141	3.1898	0.3028	0.0949276	1.2316	1.7537		At30019141	At4g13530	-0.082	0	0.27	-0.028	0.039	-0.156	0.046	0.194	0.007	-0.013	0.402	0.344	0.336	0.342	0.168		0	0.0398	0.136023		0.007	0.0156	0.125588		0.342	0.3184	0.0882202		At4g13530	expressed protein predicted protein, Arabidopsis thaliana
At30019217	2.68354	0.2642	0.0984519	1.20392	3.27795		At30019217	At4g14160	-0.104	0	-0.016	0.265	0.01	-0.042	-0.063	-0.064	-0.081	-0.246	0.209	0.068	0.127	0.038	0.383		0	0.031	0.138376		-0.064	-0.0992	0.0832208		0.127	0.165	0.138241		At4g14160	transport protein, putative similar to Swiss-Prot:Q15436 protein transport protein Sec23A [Homo sapiens]
At30019767	2.86466	0.3658	0.127694	1.28592	2.75256		At30019767	At4g18580	-0.166	0	0.2	0.264	-0.253	0.647	0.638	0.628	0.861	1.02	0.958	1.128	1.285	1.005	1.247		0	0.009	0.224085		0.647	0.7588	0.175265		1.128	1.1246	0.143859		At4g18580	expressed protein
At30020191	2.64082	0.3112	0.117842	1.23871	4.47718		At30020191	At4g22380	0.005	0	0.183	-0.361	-0.175	0.628	0.532	0.23	0.366	0.547	0.655	0.738	0.769	0.71	0.987		0	-0.0696	0.2063		0.532	0.4606	0.160243		0.738	0.7718	0.1274		At4g22380	ribosomal protein L7Ae/L30e/S12e/Gadd45 family protein Similar to NHP2/L7Ae family proteins, see SWISSPROT:P32495 and PMID:2063628.
At30020528	3.50748	0.4018	0.114555	1.32456	1.24313		At30020528	At4g25300	0.088	-0.12	-0.742	0	0.071	-0.285	-0.108	-0.067	-0.226	-0.011	0.327	0.301	0.121	0.084	0.479		0	-0.1406	0.346016		-0.108	-0.1394	0.113372		0.301	0.2624	0.161554		At4g25300	oxidoreductase, 2OG-Fe(II) oxygenase family protein similar to flavonol synthase [Petunia x hybrida][GI:311658], anthocyanidin synthase [Torenia fournieri][GI:12583673]; contains PF03171 2OG-Fe(II) oxygenase superfamily domain
At30020529	3.22451	0.4668	0.144766	1.37953	1.47491		At30020529	At4g25300	-0.063	0	-0.373	0.005	0.316	-0.179	-0.268	-0.138	0.02	0.237	0.45	0.415	0.292	0.193	0.656		0	-0.023	0.245119		-0.138	-0.0656	0.198722		0.415	0.4012	0.17519		At4g25300	oxidoreductase, 2OG-Fe(II) oxygenase family protein similar to flavonol synthase [Petunia x hybrida][GI:311658], anthocyanidin synthase [Torenia fournieri][GI:12583673]; contains PF03171 2OG-Fe(II) oxygenase superfamily domain
At30021884	2.57717	0.345	0.133868	1.2656	4.47718		At30021884	At4g36760	-0.215	0	0.056	0.087	-0.011	0.251	0.156	0.039	0.003	-0.269	0.412	0.509	0.212	0.262	0.51		0	-0.0166	0.117976		0.039	0.036	0.19669		0.412	0.381	0.138481		At4g36760	aminopeptidase P similar to Xaa-Pro aminopeptidase 2 [Lycopersicon esculentum] GI:15384991; contains Pfam profile PF00557: metallopeptidase family M24
At30021885	3.13785	0.3606	0.114919	1.28749	1.7537		At30021885	At4g36760	-0.169	-0.082	0.081	0.047	0	0.134	0.203	0.033	0.109	-0.094	0.408	0.501	0.327	0.269	0.683		0	-0.0246	0.101278		0.109	0.077	0.113276		0.408	0.4376	0.162615		At4g36760	aminopeptidase P similar to Xaa-Pro aminopeptidase 2 [Lycopersicon esculentum] GI:15384991; contains Pfam profile PF00557: metallopeptidase family M24
At30022022	2.48762	0.4128	0.165942	1.33142	5.37887		At30022022	At4g38060	0.169	0.458	-0.169	-0.131	0	-0.636	-0.215	-0.366	-0.396	-0.774	-0.131	-0.173	-0.119	0.318	-0.218		0	0.0654	0.256252		-0.396	-0.4774	0.224174		-0.131	-0.0646	0.21739		At4g38060	expressed protein
At30022331	3.57179	0.5618	0.157288	1.4655	1.02009		At30022331	At5g01520	-0.296	0	-0.06	0.031	0.271	-0.984	-0.709	-0.615	-0.69	-0.294	-0.179	-0.329	0.041	-0.05	0.034		0	-0.0108	0.203122		-0.69	-0.6584	0.247106		-0.05	-0.0966	0.15729		At5g01520	zinc finger (C3HC4-type RING finger) family protein similar to MTD2 [Medicago truncatula] GI:9294812; contains Pfam profile PF00097: Zinc finger, C3HC4 type (RING finger)
At30022388	3.16795	0.6852	0.216291	1.57509	1.7537		At30022388	At5g02020	-0.299	0.465	0	-0.155	0.131	-1.376	-0.678	-0.363	-1.035	-0.887	-0.44	-0.137	-0.219	0.09	-0.207		0	0.0284	0.292737		-0.887	-0.8678	0.379947		-0.207	-0.1826	0.190109		At5g02020	expressed protein
At30022389	2.9537	0.554	0.187562	1.44803	2.16718		At30022389	At5g02020	-0.223	0.561	0	-0.099	0.164	-0.989	-0.471	-0.159	-0.758	-0.721	-0.275	-0.063	-0.076	0.205	-0.119		0	0.0806	0.303589		-0.721	-0.6196	0.316278		-0.076	-0.0656	0.173233		At5g02020	expressed protein
At30022904	2.76657	0.237	0.0856656	1.18033	3.27795		At30022904	At5g06530	-0.028	0.082	-0.031	0.753	0	-0.122	-0.056	0.01	-0.105	0.037	0.26	0.107	0.33	0.202	0.05		0	0.1552	0.337284		-0.056	-0.0472	0.0695967		0.202	0.1898	0.113063		At5g06530	ABC transporter family protein
At30022967	2.57725	0.4016	0.155825	1.32464	4.47718		At30022967	At5g07100	0.058	-0.322	-0.554	0	0.235	-0.337	-0.135	0.108	0.067	-0.189	0.454	0.378	0.19	-0.026	0.526		0	-0.1166	0.316706		-0.135	-0.0972	0.184681		0.378	0.3044	0.223134		At5g07100	WRKY family transcription factor SPF1 protein - Ipomoea batatas (sweet potato), PIR:S51529
At30022968	3.3223	0.621	0.186918	1.519	1.47491		At30022968	At5g07100	0	-0.258	-0.93	0.045	0.335	0.091	0.206	0.468	0.473	-0.289	1.09	0.75	0.749	0.629	0.836		0	-0.1616	0.478315		0.206	0.1898	0.314988		0.75	0.8108	0.172594		At5g07100	WRKY family transcription factor SPF1 protein - Ipomoea batatas (sweet potato), PIR:S51529
At30023328	2.85794	0.51648	0.180718	1.42814	2.75256		At30023328	At5g10710	0	0.325	-0.602	-0.117	0.295	0.155	0.369	0.223	-0.131		0.665	0.926	0.572	0.509	0.284		0	-0.0198	0.376425		0.189	0.154	0.20993		0.572	0.5912	0.234006		At5g10710	expressed protein
At30023352	3.39176	0.4782	0.140989	1.38712	1.24313		At30023352	At5g10930	0	0.028	-0.414	0.209	-0.145	-1.641	-1.411	-1.217	-1.697	-1.673	-1.175	-0.973	-0.978	-0.883	-1.239		0	-0.0644	0.232459		-1.641	-1.5278	0.207825		-0.978	-1.0496	0.150289		At5g10930	CBL-interacting protein kinase 5 (CIPK5) identical to CBL-interacting protein kinase 5 GP|9280632|gb|AAF86504 [Arabidopsis thaliana]
At30023967	2.44698	0.285	0.11647	1.21381	5.37887		At30023967	At5g16880	-0.107	0	0.349	-0.083	0.096	0.163	0.068	0.181	0.226	-0.211	0.331	0.419	0.224	0.488	0.39		0	0.051	0.184628		0.163	0.0854	0.175418		0.39	0.3704	0.09945		At5g16880	VHS domain-containing protein / GAT domain-containing protein weak similarity to hepatocyte growth factor-regulated tyrosine kinase substrate [Homo sapiens] GI:2731383; contains Pfam profiles PF00790: VHS domain, PF03127: GAT domain
At30024067	3.29052	0.5256	0.159732	1.43473	1.47491		At30024067	At5g17760	0	0.065	-0.001			1.49	1.031	0.872	1.224	1.156	1.437	1.661	1.645	1.69	1.968		0	0.0213333	0.0378197		1.156	1.1546	0.230462		1.661	1.6802	0.189525		At5g17760	AAA-type ATPase family protein contains Pfam profile: ATPase family PF00004
At30024173	3.00213	0.3546	0.118116	1.26962	2.16718		At30024173	At5g18640	-0.295	-0.212	0.125	0	0.005	-0.126	0.08	-0.026	-0.388	-0.332	0.151	0.245	0.196	0.249	0.14		0	-0.0754	0.172622		-0.126	-0.1584	0.198914		0.196	0.1962	0.0509186		At5g18640	lipase class 3 family protein low similarity to Triacylglycerol Acylhydrolase (E.C.3.1.1.3) [Rhizomucor miehei] GI:230348; contains Pfam profile PF01764: Lipase
At30024256	3.89963	0.5436	0.139398	1.45726	0.534461		At30024256	At5g19330	-0.159	0.06	-0.085	0.246	0	-0.007	0.056	-0.027	-0.219	-0.383	0.424	0.523	0.172	0.374	0.645		0	0.0124	0.154801		-0.027	-0.116	0.181166		0.424	0.4276	0.17648		At5g19330	armadillo/beta-catenin repeat family protein / BTB/POZ domain-containing protein contains armadillo/beta-catenin-like repeats, Pfam:PF00514 and a BTB/POZ domain, Pfam:PF00651
At30024398	4.52025	0.4478	0.0990653	1.36478	0.21257		At30024398	At5g20620	0	0.229	0.241	-0.071	-0.095	0.021	0	-0.192	-0.182	0.009	0.258	0.461	0.404	0.522	0.25		0	0.0608	0.162869		0	-0.0688	0.108216		0.404	0.379	0.121532		At5g20620	polyubiquitin (UBQ4) identical to GI:17677
At30024512	2.55221	0.4404	0.172556	1.34257	4.47718		At30024512	At5g22290	-0.078	0.269	0.628	0	-0.029	-0.389	-0.428	-0.382	-1.017	-0.3	-0.02	-0.037	-0.099	0.127	-0.285		0	0.158	0.295318		-0.389	-0.5032	0.290975		-0.037	-0.0628	0.149336		At5g22290	no apical meristem (NAM) family protein contains Pfam PF02365: No apical meristem (NAM) domain
At30024642	2.9376	0.3012	0.102533	1.23214	2.16718		At30024642	At5g23405	-0.111	0.535	0.439	-0.17	0	0.753	0.675	0.591	0.467	0.491	0.996	1.055	0.826	0.813	0.793		0	0.1386	0.325621		0.591	0.5954	0.121016		0.826	0.8966	0.12008		At5g23405	high mobility group (HMG1/2) family protein contains Pfam profile PF00505: HMG (high mobility group) box
At30025734	3.6785	0.4478	0.121734	1.37181	0.760034		At30025734	At5g39140	-0.475	0	-0.515	0.45	0.275	0.207	0.374	0.312	0.261	0.144	0.921	0.645	0.539	0.526	0.906		0	-0.053	0.434434		0.261	0.2596	0.0893941		0.645	0.7074	0.193794		At5g39140	hypothetical protein
At30026142	3.78764	0.8814	0.232704	1.83511	0.760034		At30026142	At5g42900	-0.648	0	-0.502	0.08	0.1	-0.8	-0.882	-1.465	-1.568	-1.23	0.046	-0.012	-0.66	-0.409	-0.503		0	-0.194	0.353599		-1.23	-1.189	0.341712		-0.409	-0.3076	0.310266		At5g42900	expressed protein similar to unknown protein (pir||T05226)
At30026143	2.82398	0.8834	0.31282	1.85812	2.75256		At30026143	At5g42900	-0.575	0.023	-0.562	0	0.047	-0.766	-0.98	-1.596	-1.816	-1.212	0.099	0.078	-1.005	-0.55	-0.575		0	-0.2134	0.324619		-1.212	-1.274	0.431796		-0.55	-0.3906	0.473337		At5g42900	expressed protein similar to unknown protein (pir||T05226)
At30027319	3.76889	0.8694	0.230678	1.77415	0.760034		At30027319	At5g53160	-0.135	0.073	0.171	-0.027	0	0.067	0.377	-0.001	-0.137	-0.794	0.907	0.875	0.542	0.715	0.82		0	0.0164	0.114214		-0.001	-0.0976	0.432491		0.82	0.7718	0.147722		At5g53160	expressed protein similar to unknown protein (pir||T02893)
At30027636	2.63941	0.6128	0.232173	1.4811	4.47718		At30027636	At5g55970	-0.25	0.1	-0.544	0.16	0	-0.834	-0.453	0.032	-0.847		-0.218	0.113	0.126	0.073	-0.182		0	-0.1068	0.290261		-0.644	-0.5255	0.414165		0.073	-0.0176	0.168132		At5g55970	zinc finger (C3HC4-type RING finger) family protein contains Pfam profile: PF00097 zinc finger, C3HC4 type (RING finger)
At30027789	2.55984	0.5226	0.204153	1.40711	4.47718		At30027789	At5g57340	0	0.228	-1.101	0.127	-0.047	-0.306	-0.15	0.117	-0.613	-0.804	0.081	0.068	0.162	0.443	0.103		0	-0.1586	0.537762		-0.306	-0.3512	0.365822		0.103	0.1714	0.156043		At5g57340	expressed protein
At30027823	2.86356	0.6004	0.209669	1.47322	2.75256		At30027823	At5g57650	0	0.209	-0.357	-0.117	0.111	0.366	0.345	0.118	0.065	-0.639	0.695	0.63	0.612	0.628	0.692		0	-0.0308	0.219315		0.118	0.051	0.408181		0.63	0.6514	0.0390743		At5g57650	eukaryotic translation initiation factor-related contains weak similarity to Swiss-Prot:Q38884 eukaryotic translation initiation factor 3 subunit 2 (eIF-3 beta) (eIF3 p36) (eIF3i) (TGF-beta receptor interacting protein 1) (TRIP-1) [Arabidopsis thaliana]
At30027914	3.73527	0.5266	0.140981	1.43126	0.760034		At30027914	At5g58370	-0.167	0	0.609	0.076	-0.23	-0.269	-0.194	-0.471	-0.723	-0.208	0.222	-0.037	0.146	0.294	0.143		0	0.0576	0.331985		-0.269	-0.373	0.224825		0.146	0.1536	0.123379		At5g58370	expressed protein
At30028076	2.75553	0.5956	0.216147	1.49188	3.27795		At30028076	At5g59780	0	0.206	-0.163	0.101	-0.027	-0.66	-0.345	-0.537	-0.675	-1.296	-0.421	0.016	-0.013	0.146	-0.263		0	0.0234	0.138922		-0.66	-0.7026	0.357072		-0.013	-0.107	0.229623		At5g59780	myb family transcription factor (MYB59) contains PFAM profile: myb DNA binding domain PF00249
At30028708	4.67512	0.69	0.14759	1.60015	0.21257		At30028708	At5g65210	-0.064	-0.049	0.006	0	0.082	-0.686	-0.48	-0.086	-0.167	-0.375	0.488	0.32	0.355	0.35	0.143		0	-0.005	0.0572975		-0.375	-0.3588	0.241464		0.35	0.3312	0.123542		At5g65210	bZIP family transcription factor (TGA1) identical to transcription factor (TGA1) GI:16550 from [Arabidopsis thaliana]
At30028733	2.93491	0.3166	0.107874	1.24148	2.16718		At30028733	At5g65430	0	0.122	-0.033	-0.178	0.111	-0.062	-0.074	-0.006	0.139	-0.299	0.367	0.275	0.233	0.288	0.118		0	0.0044	0.122353		-0.062	-0.0604	0.157985		0.275	0.2562	0.0912124		At5g65430	14-3-3 protein GF14 kappa (GRF8) identical to 14-3-3 protein GF14 kappa GI:5802794, SP:P48348 from [Arabidopsis thaliana]
