# Supplementary material for: Virus Adaptation by Manipulation of Host's Gene Expression
Source: PLoS One. 2008 Jun 11;3(6):e2397. doi: 10.1371/journal.pone.0002397 (PMC2398778; doi:10.1371/journal.pone.0002397)
Supplement: Table S4 — SOM clustering of significant genes, both up- and down-regulated, between TEV- and TEV-At17-infected plants. Genes belonging to each of the eight SOMs in Figure 3 are listed on different spreadsheets, along with their annotation and mean expression data in control and in TEV- and TEV-At17-infected plants. (0.48 MB XLS) [file pone.0002397.s005.xls]

## Sheet: SOM1 Up
Oligo ID	Mock	TEV	TEV-At		Gene	Annotation
A004707_01	0	0.977	1.686		At1g19610	plant defensin-fusion protein, putative (PDF1.4) plant defensin protein family member, personal communication, Bart Thomma (Bart.Thomma@agr.kuleuven.ac.be); similar to SWISS-PROT:P30224, Cysteine-rich antifungal protein 1 precursor (AFP1)[Arabidopsis thal
A006150_01	0	0.875	1.941		At2g43570	chitinase, putative similar to chitinase class IV GI:722272 from [Brassica napus]
A006596_01	0	2.06	3.949		At2g29350	tropinone reductase, putative / tropine dehydrogenase, putative similar to tropinone reductase SP:P50165 from [Datura stramonium]
A008459_01	0	0.803	1.875		At2g45210	auxin-responsive protein-related weakly similar to small auxin up RNA (GI:546362) {Arabidopsis thaliana}
A008873_01	0	0.748	2.189		At3g04070	no apical meristem (NAM) family protein contains Pfam PF02365: No apical meristem (NAM) domain; similar to NAM GB:CAA63101 [Petunia x hybrida]
A011198_01	0	0.779	3.987		At3g60140	glycosyl hydrolase family 1 protein contains Pfam PF00232 : Glycosyl hydrolase family 1 domain; TIGRFAM TIGR01233: 6-phospho-beta-galactosidase; similar to Cyanogenic Beta-Glucosidase (GI:1311386)(pdb:1CBG) [Trifolium Repens]; identical beta-glucosidase G
A011500_01	0	1.376	2.772		At3g09270	glutathione S-transferase, putative similar to glutathione transferase GB:CAA71784 [Glycine max]
A012880_01	0	0.138	3.595		At4g11650	osmotin-like protein (OSM34) nearly identical to SP|P50700|OSL3_ARATH Osmotin-like protein OSM34 precursor {Arabidopsis thaliana}; contains Pfam profile PF00314: Thaumatin family
A013697_01	0	0.737	2.506		At4g15610	integral membrane family protein contains TIGRFAM TIGR01569 : plant integral membrane protein TIGR01569; contains Pfam PF04535 : Domain of unknown function (DUF588)
A014046_01	0	1.278	2.263		At4g25000	alpha-amylase, putative / 1,4-alpha-D-glucan glucanohydrolase, putative similar to alpha-amylase from Vigna mungo SP|P17859, Ipomoea nil GI:21670851; contains Pfam profile PF00128: Alpha amylase, catalytic domain
A014180_01	0	1.242	2.338		At4g38540	monooxygenase, putative (MO2) identical to GI:3426064
A017311_01	0	1.082	1.802		At5g13330	AP2 domain-containing transcription factor family protein similar to AP2 domain containing protein RAP2.6, Arabidopsis thaliana, EMBL:AF003099; contains Pfam profile PF00847: AP2 domain
A017767_01	0	1.124	2.411		At5g13080	WRKY family transcription factor WRKY DNA binding protein - Solanum tuberosum, EMBL:AJ278507
A018825_01	0	0.746	1.808		At5g17760	AAA-type ATPase family protein contains Pfam profile: ATPase family PF00004
A019812_01	0	1.414	2.139		At3g51860	cation exchanger, putative (CAX3) similar to high affinity calcium antiporter CAX1 [Arabidopsis thaliana] gi|9256741|gb|AAB05913; Ca2+:Cation Antiporter (CaCA) Family member PMID:11500563; non-consensus AT-acceptor splice site at intron 1
A019892_01	0	0.76	1.728		At1g78290	serine/threonine protein kinase, putative similar to serine-threonine protein kinase [Triticum aestivum] gi|2055374|gb|AAB58348
A020071_01	0	0.655	1.686		At1g22990	heavy-metal-associated domain-containing protein / copper chaperone (CCH)-related low similarity to copper homeostasis factor [GI:3168840][PMID:9701579]; strong similarity to farnesylated protein ATFP7 [GI:4097555]; contains heavy-metal-associated domain
A020605_01	0	0.355	2.416		At2g25450	2-oxoglutarate-dependent dioxygenase, putative similar to 2A6 (GI:599622) and tomato ethylene synthesis regulatory protein E8 (SP|P10967)
A021954_01	0	1.088	2.008		At2g05380	glycine-rich protein (GRP3S) identical to cDNA glycine-rich protein 3 short isoform (GRP3S) GI:4206766
A022124_01	0	1.593	2.847		At2g14610	pathogenesis-related protein 1 (PR-1) identical to GB:M90508 SP|P33154
A024336_01	0	1.193	2.535		At3g48360	speckle-type POZ protein-related contains Pfam PF00651 : BTB/POZ domain; similar to Speckle-type POZ protein (SP:O43791) [Homo sapiens]
A024460_01	0	1.797	2.924		At1g13340	expressed protein contains Pfam profile: PF03398 eukaryotic protein of unknown function, DUF292
A024527_01	0	2.044	2.835		At1g75750	gibberellin-regulated protein 1 (GASA1) / gibberellin-responsive protein 1 identical to SP|P46689 Gibberellin-regulated protein 1 precursor {Arabidopsis thaliana}; supporting cDNA gi|887938|gb|U11766.1|ATU11766
A025060_01	0	0.837	4.168		At3g44300	nitrilase 2 (NIT2) identical to SP|P32962 Nitrilase 2 (EC 3.5.5.1) {Arabidopsis thaliana}
A200982_01	0	2.625	3.771		At1g67980	caffeoyl-CoA 3-O-methyltransferase, putative similar to GI:2960356 [Populus balsamifera subsp. trichocarpa], GI:684942 [Medicago sativa subsp. sativa]
At30005244	0	0.706	1.776		At1g60730	aldo/keto reductase family protein contains Pfam profile PF00248: oxidoreductase, aldo/keto reductase family
At30005245	0	1.041	2.156		At1g60740	peroxiredoxin type 2, putative strong similarity to type 2 peroxiredoxin [Brassica rapa subsp. pekinensis] GI:4928472; contains Pfam profile: PF00578 AhpC/TSA (alkyl hydroperoxide reductase and thiol-specific antioxidant) family
At30006039	0	2.414	3.733		At1g67980	caffeoyl-CoA 3-O-methyltransferase, putative similar to GI:2960356 [Populus balsamifera subsp. trichocarpa], GI:684942 [Medicago sativa subsp. sativa]
At30006040	0	2.317	3.636		At1g67980	caffeoyl-CoA 3-O-methyltransferase, putative similar to GI:2960356 [Populus balsamifera subsp. trichocarpa], GI:684942 [Medicago sativa subsp. sativa]
At30007048	0	0.546	1.892		At1g77145	expressed protein contains Pfam profile PF04720: Protein of unknown function (DUF506)
At30010676	0	1.014	1.787		At2g36080	DNA-binding protein, putative strong similarity to DNA-binding proteins from [Arabidopsis thaliana] RAV1 GI:3868857, RAV2 GI:3868859; contains Pfam profile PF02362: B3 DNA binding domain
At30011547	0	0.879	2.029		At2g43510	trypsin inhibitor, putative similar to SP|P26780 Trypsin inhibitor 2 precursor (MTI-2) {Sinapis alba}
At30024067	0	1.156	1.661		At5g17760	AAA-type ATPase family protein contains Pfam profile: ATPase family PF00004
A020285_01	0	0.851	2.309		At1g19530	expressed protein
A022543_01	0	1.151	1.976		At4g01430	nodulin MtN21 family protein similar to MtN21 GI:2598575 (root nodule development) from [Medicago truncatula]

## Sheet: SOM2 Up
Oligo ID	Mock	TEV	TEV-At		Gene	Annotation
A000061_01	0	0.629	1.26		At1g76590	zinc-binding family protein similar to zinc-binding protein [Pisum sativum] GI:16117799; contains Pfam profile PF04640 : Protein of unknown function, DUF597
A000153_01	0	0.576	1.584		At1g09240	nicotianamine synthase, putative similar to nicotianamine synthase [Lycopersicon esculentum][GI:4753801], nicotianamine synthase 2 [Hordeum vulgare][GI:4894912]
A000827_01	0	-0.148	0.925		At1g80160	lactoylglutathione lyase family protein / glyoxalase I family protein contains glyoxalase family protein domain, Pfam:PF00903
A001204_01	0	0.387	0.827		At1g33350	pentatricopeptide (PPR) repeat-containing protein contains multiple Pfam domains: PF01535: PPR repeat
A001308_01	0	0.337	0.601		At1g01725	expressed protein
A001521_01	0	0.435	0.76		At1g73380	expressed protein
A001568_01	0	0.509	0.669		At1g09100	26S protease regulatory subunit 6A, putative identical to SP:O04019 from [Arabidopsis thaliana]
A001760_01	0	0.194	0.975		At1g52930	brix domain-containing protein contains Pfam domain, PF04427: Brix domain
A001874_01	0	0.217	0.992		At1g72680	cinnamyl-alcohol dehydrogenase, putative similar to cinnamyl-alcohol dehydrogenase GB:AAC35846 [Medicago sativa], SP|Q08350 [Picea abies]
A002044_01	0	0.353	0.546		At1g27630	cyclin family protein similar to cyclin T1 [Homo sapiens] GI:2981196; contains Pfam profile PF00134: Cyclin, N-terminal domain
A003201_01	0	0.61	1.054		At1g01640	speckle-type POZ protein-related contains Pfam profile:PF00651 BTB/POZ domain; similar to Speckle-type POZ protein (SP:O43791) [Homo sapiens]
A004317_01	0	0.614	1.014		At1g70690	kinase-related contains Pfam PF01657:Domain of unknown function; similar to receptor-like protein kinase 4 GI:13506745 [Arabidopsis thaliana]
A004915_01	0	0.619	0.854		At1g60140	glycosyl transferase family 20 protein / trehalose-phosphatase family protein contains Pfam profile: PF02358 trehalose-phosphatase
A005086_01	0	0.203	0.663		At1g22930	T-complex protein 11 contains Pfam PF05794: T-complex protein 11
A005192_01	0	0.379	0.701		At1g09290	expressed protein This gene is continued on the 5' end of BAC T12M14
A005687_01	0	0.581	1.068		At5g58570	expressed protein
A006539_01	0	0.324	0.622		At2g34260	transducin family protein / WD-40 repeat family protein similar to Vegetatible incompatibility protein HET-E-1 (SP:Q00808) {Podospora anserina}
A006996_01	0	0.409	0.953		At2g02230	F-box family protein / SKP1 interacting partner 3-related contains similarity to SKP1 interacting partner 3 GI:10716951 from [Arabidopsis thaliana]
A007535_01	0	0.38	0.871		At2g15960	expressed protein
A007835_01	0	0.472	0.76		At2g04410	expressed protein
A007852_01	0	0.232	0.657		At2g36340	DNA-binding storekeeper protein-related contains similarity to storekeeper protein [Solanum tuberosum] gi|14268476|emb|CAC39398; contains PF04504: Protein of unknown function, DUF573
A007977_01	0	-0.024	0.93		At2g18050	histone H1-3 (HIS1-3) similar to histone H1 [Lycopersicon pennellii] SWISS-PROT:P40267; identical to cDNA histone H1-3 (His1-3) GI:1809314, histone H1-3 [Arabidopsis thaliana] GI:1809305
A009209_01	0	0.526	0.86		At3g07660	expressed protein
A009822_01	0	0.065	0.756		At3g11600	expressed protein weak similarity to B-type cyclin (GI:849074) [Nicotiana tabacum]
A009836_01	0	-0.083	1.22		At3g01970	WRKY family transcription factor similar to WRKY1 GB:AAC49527 [Petroselinum crispum]
A010364_01	0	0.176	0.729		At3g11100	expressed protein similar to 6b-interacting protein 1 (NtSIP1) [Nicotiana tabacum] GI:18149189
A010667_01	0	0.205	0.748		At3g19520	expressed protein contains Pfam profile PF04776: Protein of unknown function (DUF626)
A010857_01	0	0.167	0.777		At3g24080	KRR1 family protein contains Pfam PF05178: Krr1 family
A010911_01	0	0.918	1.424		At3g47800	aldose 1-epimerase family protein similar to ALDOSE 1-EPIMERASE PRECURSOR GB:P05149 [SP|P05149] from [Acinetobacter calcoaceticus]; contains Pfam profile PF01263 Aldose 1-epimerase
A011094_01	0	0	0.789		At3g21790	UDP-glucoronosyl/UDP-glucosyl transferase family protein contains Pfam profile: PF00201 UDP-glucoronosyl and UDP-glucosyl transferase
A011200_01	0	0.381	0.753		At3g60180	uridylate kinase, putative / uridine monophosphate kinase, putative / UMP kinase, putative similar to uridylate kinase (EC 2.7.4.-) (UK) (Uridine monophosphate kinase) (UMP kinase) (UMP/CMP kinase) (Swiss-Prot:O04905) [Arabidopsis thaliana]
A012649_01	0	0.842	1.439		At3g03640	glycosyl hydrolase family 1 protein contains Pfam PF00232 : Glycosyl hydrolase family 1 domain; TIGRFAM TIGR01233: 6-phospho-beta-galactosidase; identical to beta-glucosidase GB:AAC31962 [Arabidopsis thaliana]; similar to thioglucoside glucohydrolase (GI:
A012866_01	0	0.164	0.677		At4g23450	zinc finger (C3HC4-type RING finger) family protein contains Pfam profile: PF00097 zinc finger, C3HC4 type
A013240_01	0	0.559	1.059		At4g10920	transcriptional coactivator p15 (PC4) family protein (KELP) similar to SP|P53999 Activated RNA polymerase II transcriptional coactivator p15 (PC4) (p14) {Homo sapiens}; contains Pfam profile PF02229: Transcriptional Coactivator p15 (PC4); supporting cDNA
A013351_01	0	0.452	1.533		At4g39190	expressed protein ; expression supported by MPSS
A013780_01	0	0.133	0.785		At4g09760	choline kinase, putative similar to GmCK2p choline kinase gi|1438881|gb|AAC49375
A014928_01	0	0.033	1.389		At4g03320	chloroplast protein import component-related similar to P. sativum Tic20 chloroplast protein import component (GI:3769673)
A015330_01	0	0.354	0.992		At4g33540	metallo-beta-lactamase family protein
A015433_01	0	0.713	1.299		At4g36670	mannitol transporter, putative similar to mannitol transporter [Apium graveolens var. dulce] GI:12004316; contains Pfam profile PF00083: major facilitator superfamily protein
A015540_01	0	0.746	1.354		At5g53730	harpin-induced family protein / HIN1 family protein / harpin-responsive family protein similar to harpin-induced protein hin1 ( GI:1619321) [Nicotiana tabacum];
A015870_01	0	0.273	0.783		At5g03470	serine/threonine protein phosphatase 2A (PP2A) regulatory subunit B' (B'alpha) similar to SWISS-PROT:Q28653 serine/threonine protein phosphatase 2A, 56 kDa regulatory subunit, delta isoform (PP2A, B subunit, B' delta isoform, PP2A, B subunit, B56 delta is
A016586_01	0	0.115	0.913		At5g06370	NC domain-containing protein contains Pfam domain, PF04970: NC domain
A016971_01	0	0.096	1.451		At5g39520	expressed protein predicted protein, Synechocystis sp., PIR:S77152
A017013_01	0	0.366	0.735		At5g55530	C2 domain-containing protein low similarity to cold-regulated gene SRC2 [Glycine max] GI:2055230; contains Pfam profile PF00168: C2 domain
A017277_01	0	0.188	0.841		At5g17860	cation exchanger, putative (CAX7) contains similarity to SWISS-PROT:Q9HC58 NKX3_HUMAN Sodium/potassium/calcium exchanger 3 precursor {Homo sapiens}; Ca2+:Cation Antiporter (CaCA) Family member PMID:11500563
A017542_01	0	0.464	0.81		At5g53460	glutamate synthase [NADH], chloroplast, putative similar to SP|Q03460 Glutamate synthase [NADH], chloroplast precursor (EC 1.4.1.14) (NADH- GOGAT) {Medicago sativa}
A017612_01	0	0.274	0.819		At5g57550	xyloglucan:xyloglucosyl transferase / xyloglucan endotransglycosylase / endo-xyloglucan transferase (XTR3) identical to endoxyloglucan transferase GI:5533317 from [Arabidopsis thaliana]
A017735_01	0	0.483	0.742		At5g05000	translocate of chloroplast 34 (TOC34) / GTP-binding protein (OEP34) contains Pfam PF04548: AIG1 family;contains TIGRFAM TIGR00991: GTP-binding protein and TIGR00231: small GTP-binding protein domain; 99.7% identical to atToc34 protein (GI:11557975) [Arabi
A018578_01	0	0.089	0.956		At5g40720	expressed protein contains Pfam profile PF01697: Domain of unknown function
A018678_01	0	0.296	1.012		At5g55560	protein kinase family protein contains protein kinase domain, Pfam:PF00069
A018803_01	0	0.298	0.627		At5g65430	14-3-3 protein GF14 kappa (GRF8) identical to 14-3-3 protein GF14 kappa GI:5802794, SP:P48348 from [Arabidopsis thaliana]
A020316_01	0	0.517	0.78		At5g01350	expressed protein
A020342_01	0	0.454	0.773		At2g05630	autophagy 8d (APG8d) identical to autophagy 8d [Arabidopsis thaliana] GI:19912157; contains Pfam profile PF02991: Microtubule associated protein 1A/1B, light chain 3
A020748_01	0	0.243	0.947		At2g05540	glycine-rich protein
A021885_01	0	0.437	0.79		At5g17190	expressed protein similar to unknown protein (gb|AAF26109.1)
A022634_01	0	0.08	0.901		At4g37150	esterase, putative similar to ethylene-induced esterase [Citrus sinensis] GI:14279437, polyneuridine aldehyde esterase [Rauvolfia serpentina] GI:6651393; contains Pfam profile PF00561: hydrolase, alpha/beta fold family
A022924_01	0	0.398	1.138		At5g39850	40S ribosomal protein S9 (RPS9C) 40S ribosomal protein S9 - Chlamydomonas sp.,EMBL:AU066528
A023066_01	0	0.36	0.553		At5g12190	RNA recognition motif (RRM)-containing protein similar to SP|P52298 20 kDa nuclear cap binding protein (NCBP 20 kDa subunit) (CBP20) (NCBP interacting protein 1) (NIP1) {Homo sapiens}; contains InterPro entry IPR000504: RNA-binding region RNP-1 (RNA recog
A023091_01	0	0.297	0.887		At5g40240	nodulin MtN21 family protein similar to MtN21 [Medicago truncatula] GI:2598575; contains Pfam profile PF00892: Integral membrane protein
A023725_01	0	0.443	0.841		At1g34440	hypothetical protein
A024003_01	0	0.544	1.013		At1g49840	expressed protein contains Pfam profile PF04788: Protein of unknown function (DUF620)
A024282_01	0	0.796	1.298		At5g62740	band 7 family protein strong similarity to hypersensitive-induced response protein [Zea mays] GI:7716470; contains Pfam profile PF01145: SPFH domain / Band 7 family; supporting cDNA gi|17065547|gb|AY062850.1|
A024503_01	0	0.378	1.567		At2g37750	expressed protein
A024612_01	0	0.219	0.779		At5g53160	expressed protein similar to unknown protein (pir||T02893)
A024620_01	0	0.577	1.398		At4g24690	ubiquitin-associated (UBA)/TS-N domain-containing protein / octicosapeptide/Phox/Bemp1 (PB1) domain-containing protein contains Pfam profiles PF00627: Ubiquitin-associated (UBA)/TS-N domain, PF00569: Zinc finger ZZ type domain, PF00564: PB1 domain
A200148_01	0	0.648	0.99		At5g23405	high mobility group (HMG1/2) family protein contains Pfam profile PF00505: HMG (high mobility group) box
A200218_01	0	-0.159	1.453		At1g02470	expressed protein contains non-consensus splice sites;
A200542_01	0	0.354	1.084		At1g26665	expressed protein
A201410_01	0	0.889	1.432		At2g31200	actin-depolymerizing factor 6 (ADF6) identical to SP|Q9ZSK2 Actin-depolymerizing factor 6 (ADF-6) (AtADF6) {Arabidopsis thaliana}
A202756_01	0	0.632	1.119		At5g20460	hypothetical protein
A202894_01	0	0.281	0.867		At5g25770	expressed protein
A203319_01	0	0.339	0.696		At5g52470	fibrillarin 1 (FBR1) (FIB1) (SKIP7) identical to fibrillarin 1 GI:9965653 from [Arabidopsis thaliana]; C-terminus identical to SKP1 interacting partner 7 GI:10716959 from [Arabidopsis thaliana]; contains Pfam domain PF01269: Fibrillarin
At30000209	0	0.556	1.372		At1g02850	glycosyl hydrolase family 1 protein contains Pfam PF00232 : Glycosyl hydrolase family 1 domain; TIGRFAM TIGR01233: 6-phospho-beta-galactosidase; similar to hydroxyisourate hydrolase (GI:19569603) [Glycine max]
At30000328	0	0.195	1.567		At1g03850	glutaredoxin family protein contains INTERPRO Domain IPR002109, Glutaredoxin (thioltransferase)
At30001371	0	0.405	0.825		At1g12780	UDP-glucose 4-epimerase / UDP-galactose 4-epimerase / Galactowaldenase identical to SP|Q42605 [GB:CAA90941] from [Arabidopsis thaliana] (Arch. Biochem. Biophys. 327 (1), 27-34 (1996))
At30002228	0	0.692	1.252		At1g20620	catalase 3 (SEN2) almost identical to catalase 3 SP:Q42547, GI:3123188 from [Arabidopsis thaliana]; identical to catalase 3 (SEN2) mRNA, partial cds GI:3158369
At30002798	0	0.276	1.207		At1g26665	expressed protein
At30002799	0	0.532	1.253		At1g26665	expressed protein
At30002990	0	0.781	1.202		At1g28330	dormancy-associated protein, putative (DRM1) identical to dormancy-associated protein [Arabidopsis thaliana] GI:2995990; similar to dormancy-associated protein GI:2605887 from [Pisum sativum]; contains Pfam profile PF05564: Dormancy/auxin associated prote
At30004772	0	0.379	1.617		At1g54575	expressed protein
At30006361	0	0.721	1.325		At1g70810	C2 domain-containing protein similar to zinc finger and C2 domain protein GI:9957238 from [Arabidopsis thaliana]
At30007637	0	0.315	0.85		At2g02390	glutathione S-transferase zeta 1 (GSTZ1) (GST18) identical to SP|Q9ZVQ3|GTZ1_ARATH Glutathione S-transferase zeta-class 1 (EC 2.5.1.18) (AtGSTZ1) (Maleylacetone isomerase) (EC 5.2.1.-) (MAI) {Arabidopsis thaliana}; contains Pfam profiles PF02798: Glutathi
At30008653	0	0.065	1.117		At2g18050	histone H1-3 (HIS1-3) similar to histone H1 [Lycopersicon pennellii] SWISS-PROT:P40267; identical to cDNA histone H1-3 (His1-3) GI:1809314, histone H1-3 [Arabidopsis thaliana] GI:1809305
At30008654	0	0.458	1.207		At2g18050	histone H1-3 (HIS1-3) similar to histone H1 [Lycopersicon pennellii] SWISS-PROT:P40267; identical to cDNA histone H1-3 (His1-3) GI:1809314, histone H1-3 [Arabidopsis thaliana] GI:1809305
At30009625	0	0.503	0.9		At2g26980	CBL-interacting protein kinase 3 (CIPK3) identical to CBL-interacting protein kinase 3 [Arabidopsis thaliana] gi|9280638|gb|AAF86507
At30010674	0	0.457	1.248		At2g36080	DNA-binding protein, putative strong similarity to DNA-binding proteins from [Arabidopsis thaliana] RAV1 GI:3868857, RAV2 GI:3868859; contains Pfam profile PF02362: B3 DNA binding domain
At30016486	0	0.446	0.857		At3g51430	strictosidine synthase, putative (YLS2) similar to hemomucin [Drosophila melanogaster][GI:1280434], strictosidine synthase [Rauvolfia serpentina][SP|P15324]; contains strictosidine synthase domain PF03088; identical to cDNA YLS2 mRNA for strictosidine syn
At30017178	0	0.426	0.68		At3g57490	40S ribosomal protein S2 (RPS2D) 40S ribosomal protein S2 - Arabidopsis thaliana, SWISSPROT:RS2_ARATH
At30017469	0	0.614	0.966		At3g60180	uridylate kinase, putative / uridine monophosphate kinase, putative / UMP kinase, putative similar to uridylate kinase (EC 2.7.4.-) (UK) (Uridine monophosphate kinase) (UMP kinase) (UMP/CMP kinase) (Swiss-Prot:O04905) [Arabidopsis thaliana]
At30018467	0	0.406	0.779		At4g05460	F-box family protein (FBL20) contains similarity to N7 protein GI:3273101 from [Medicago truncatula]
At30018480	0	0.568	0.964		At4g05590	expressed protein contains Pfam domain, PF03650: Uncharacterized protein family (UPF0041)
At30019767	0	0.647	1.128		At4g18580	expressed protein
At30020191	0	0.532	0.738		At4g22380	ribosomal protein L7Ae/L30e/S12e/Gadd45 family protein Similar to NHP2/L7Ae family proteins, see SWISSPROT:P32495 and PMID:2063628.
At30022968	0	0.206	0.75		At5g07100	WRKY family transcription factor SPF1 protein - Ipomoea batatas (sweet potato), PIR:S51529
At30024642	0	0.591	0.826		At5g23405	high mobility group (HMG1/2) family protein contains Pfam profile PF00505: HMG (high mobility group) box
At30025734	0	0.261	0.645		At5g39140	hypothetical protein
At30027319	0	-0.001	0.82		At5g53160	expressed protein similar to unknown protein (pir||T02893)
A000602_01	0	0.238	0.719		At1g29640	expressed protein contains Pfam profile PF04520: Protein of unknown function, DUF584
A002108_01	0	0.091	0.925		At1g10170	NF-X1 type zinc finger family protein contains Pfam PF01422: NF-X1 type zinc finger; similar to transcriptional repressor NF-X1 (SP:Q12986) [Homo sapiens]; similar to EST gb|T21002
A014438_01	0	0.249	0.96		At4g12290	copper amine oxidase, putative similar to copper amine oxidase [Cicer arietinum] gi|3819099|emb|CAA08855
A018250_01	0	0.282	0.823		At5g42420	transporter-related low similarity to phosphoenolpyruvate/phosphate translocator precursor [Mesembryanthemum crystallinum] GI:9295275, glucose-6-phosphate/phosphate-translocator precursor [Solanum tuberosum] GI:2997593
A018282_01	0	0.547	1.124		At5g11150	synaptobrevin / vesicle-associated membrane protein 713 (VAMP713) identified as AtVAMP713 by Sanderfoot, A.A., et al. in Plant Physiol. 124: 1558-69 (2000); similar to Vesicle-associated membrane protein 722 (AtVAMP722) Synaptobrevin-related protein 1 (SP
A201287_01	0	0.563	1.243		At2g16595	translocon-associated protein (TRAP), putative similar to Swiss-Prot:P45434 translocon-associated protein, alpha subunit precursor (TRAP-alpha, Signal sequence receptor alpha subunit, SSR-alpha) [Arabidopsis thaliana]
At30003025	0	0.346	1.042		At1g28580	GDSL-motif lipase, putative similar to lipase [Arabidopsis thaliana] GI:1145627; contains InterPro Entry IPR001087 Lipolytic enzyme, G-D-S-L family
At30018032	0	0.287	0.788		At4g01430	nodulin MtN21 family protein similar to MtN21 GI:2598575 (root nodule development) from [Medicago truncatula]
At30018034	0	0.589	1.505		At4g01430	nodulin MtN21 family protein similar to MtN21 GI:2598575 (root nodule development) from [Medicago truncatula]

## Sheet: SOM3 Up
Oligo ID	Mock	TEV	TEV-At		Gene	Annotation
A000639_01	0	-0.728	-0.201		At1g16320	expressed protein ESTs gb|T76348, gb|N65615 and gb|Z18119 come from this gene
A000741_01	0	-0.475	-0.237		At1g66130	oxidoreductase N-terminal domain-containing protein similar to AX110P [Daucus carota] GI:285739; contains Pfam profile PF01408: Oxidoreductase family NAD-binding Rossmann fold
A001103_01	0	-1.148	-0.438		At1g01060	myb family transcription factor contains Pfam profile: PF00249 myb-like DNA-binding domain; identical to cDNA LATE ELONGATED HYPOCOTYL MYB transcription factor GI:3281845
A001155_01	0	-0.736	-0.324		At1g69490	no apical meristem (NAM) family protein similar to N-term half of NAC domain protein NAM [Arabidopsis thaliana] GI:4325282
A001791_01	0	-0.334	0.057		At1g69800	CBS domain-containing protein low similarity to SP|Q9UGI9 5'-AMP-activated protein kinase, gamma-3 subunit (AMPK gamma-3 chain) (AMPK gamma3) {Homo sapiens}; contains Pfam profile PF00571: CBS domain
A001970_01	0	-0.657	-0.004		At1g06570	4-hydroxyphenylpyruvate dioxygenase (HPD) identical to 4-hydroxyphenylpyruvate dioxygenase (HPD) SP:P93836 [Arabidopsis thaliana (Mouse-ear cress)]
A002788_01	0	-0.331	-0.113		At1g17550	protein phosphatase 2C-related / PP2C-related similar to protein phosphatase 2C GI:3242077 from (Arabidopsis thaliana)
A002818_01	0	-0.667	-0.229		At1g21920	MORN (Membrane Occupation and Recognition Nexus) repeat-containing protein /phosphatidylinositol-4-phosphate 5-kinase-related similar to phosphatidylinositol-4-phosphate 5-kinase AtPIP5K1 [Arabidopsis thaliana] GI:3702691; contains Pfam profile PF02493: M
A003115_01	0	-0.399	-0.08		At1g27480	lecithin:cholesterol acyltransferase family protein / LACT family protein similar to LCAT-like lysophospholipase (LLPL) [Homo sapiens] GI:4589720; contains Pfam profile PF02450: Lecithin:cholesterol acyltransferase (phosphatidylcholine-sterol acyltransfer
A003434_01	0	-0.306	0.043		At1g15350	expressed protein
A003892_01	0	-0.751	-0.279		At1g09530	phytochrome interacting factor 3 (PIF3) identical to phytochrome interacting factor 3 (PIF3) GI:3929585 from [Arabidopsis thaliana]
A003991_01	0	-0.348	-0.081		At1g74850	pentatricopeptide (PPR) repeat-containing protein contains Pfam profile PF01535: PPR repeat
A004044_01	0	-0.486	-0.026		At1g45230	defective chloroplasts and leaves protein-related / DCL protein-related similar to defective chloroplasts and leaves (DCL) protein SP:Q42463 from [Lycopersicon esculentum]
A004597_01	0	-0.435	0.074		At1g23390	kelch repeat-containing F-box family protein similar to hypothetical protein GB:AAF27090 GI:6730669 from (Arabidopsis thaliana); contains Pfam profiles PF01344: Kelch motif, PF00646: F-box domain
A004931_01	0	-0.512	0.043		At1g21000	zinc-binding family protein similar to zinc-binding protein [Pisum sativum] GI:16117799; contains Pfam profile PF04640 : Protein of unknown function, DUF597
A005214_01	0	-0.858	-0.095		At1g04310	ethylene receptor-related similar to ethylene receptor CS-ETR2 [Cucumis sativus] GI:6136818; contains Pfam profiles PF01590: GAF domain, PF00512: His Kinase A (phosphoacceptor) domain
A005226_01	0	-1.259	-0.709		At1g45249	ABA-responsive element-binding protein 1 (AREB1) identical to ABA-responsive element binding protein 1 (AREB1) [Arabidopsis thaliana] GI:9967417
A006161_01	0	-0.728	-0.014		At2g43820	UDP-glucoronosyl/UDP-glucosyl transferase family protein contains Pfam profile: PF00201 UDP-glucoronosyl and UDP-glucosyl transferase
A006497_01	0	-1.342	-0.379		At2g41190	amino acid transporter family protein low similarity to vesicular GABA transporter [Rattus norvegicus] GI:2587061; belongs to INTERPRO:IPR002422 amino acid/polyamine transporter, family II
A006614_01	0	-0.635	0.03		At2g37760	aldo/keto reductase family protein similar to chalcone reductase [Sesbania rostrata][GI:2792155], and aldose reductase ALDRXV4 [Xerophyta viscosa][GI:4539944], [Hordeum vulgare][GI:728592]
A006661_01	0	-0.426	-0.054		At2g16890	UDP-glucoronosyl/UDP-glucosyl transferase family protein contains Pfam profile: PF00201 UDP-glucoronosyl and UDP-glucosyl transferase
A006795_01	0	-0.75	0.024		At2g21560	expressed protein contains weak similarity to reticulocyte-binding protein 2 homolog A [Plasmodium falciparum] gi|9754767|gb|AAF98066
A006975_01	0	-1.329	-0.576		At2g46680	homeobox-leucine zipper protein 7 (HB-7) / HD-ZIP transcription factor 7 identical to homeobox-leucine zipper protein ATHB-7 (HD-ZIP protein ATHB-7) (SP:P46897) [Arabidopsis thaliana];
A007756_01	0	-0.804	0.08		At2g41250	haloacid dehalogenase-like hydrolase family protein low similarity to SP|Q94915 Rhythmically expressed gene 2 protein (DREG-2) {Drosophila melanogaster}; contains InterPro accession IPR005834: Haloacid dehalogenase-like hydrolase
A007844_01	0	-0.277	0.012		At2g36320	zinc finger (AN1-like) family protein contains Pfam domain, PF01428: AN1-like Zinc finger
A008572_01	0	-0.36	0.013		At2g42280	basic helix-loop-helix (bHLH) family protein
A008667_01	0	-0.358	-0.067		At2g46030	ubiquitin-conjugating enzyme 6 (UBC6) E2; identical to gi|431267, SP:P42750, PIR:S52661; contains a ubiquitin-conjugating enzymes active site (PDOC00163)
A008742_01	0	-0.685	-0.231		At2g33380	calcium-binding RD20 protein (RD20) induced by abscisic acid during dehydration PMID:10965948; putative transmembrane channel protein PMID:10965948; identical to GI:10862968 [Arabidopsis thaliana]; contains EF-hand domain
A009501_01	0	-0.315	0.009		At3g48740	nodulin MtN3 family protein similar to MtN3 GI:1619602 (root nodule development) from [Medicago truncatula]
A009763_01	0	-0.536	-0.086		At3g23880	F-box family protein contains F-box domain Pfam:PF00646
A010007_01	0	-0.288	0.06		At3g10572	3-phosphoinositide-dependent protein kinase-1, putative annotation temporarily based on supporting cDNA gi|17065215|gb|AY062684.1|
A010057_01	0	-0.353	-0.019		At3g29035	no apical meristem (NAM) family protein contains Pfam PF02365 : No apical meristem (NAM) protein; similar to cup-shaped cotyledon CUC2 (GI:1944132) [Arabidopsis thaliana]
A010276_01	0	-0.838	-0.439		At3g54500	expressed protein
A010456_01	0	-0.269	-0.046		At3g24200	monooxygenase family protein low similarity to VisC [Escherichia coli][GI:216629]; contains Pfam profile: PF01360 Monooxygenase
A010711_01	0	-0.733	-0.243		At3g56080	dehydration-responsive protein-related similar to early-responsive to dehydration stress ERD3 protein [Arabidopsis thaliana] GI:15320410; contains Pfam profile PF03141: Putative methyltransferase
A010743_01	0	-0.461	-0.041		At3g10810	zinc finger (C3HC4-type RING finger) family protein contains Pfam profile: PF00097 Zinc finger, C3HC4 type (RING finger)
A010853_01	0	-0.304	-0.099		At3g23920	beta-amylase, putative / 1,4-alpha-D-glucan maltohydrolase, putative similar to beta-amylase enzyme [Arabidopsis thaliana] GI:6065749, beta-amylase PCT-BMYI from [Solanum tuberosum]; contains Pfam profile PF01373: Glycosyl hydrolase family 14
A010872_01	0	-0.268	0.024		At3g58670	expressed protein
A011130_01	0	-0.372	0.121		At3g14280	expressed protein
A011231_01	0	-0.367	0.146		At3g43440	expressed protein
A011648_01	0	-0.863	-0.537		At3g54660	gluthatione reductase, chloroplast nearly identical to SP|P42770 Glutathione reductase, chloroplast precursor (EC 1.8.1.7) (GR) (GRASE) {Arabidopsis thaliana}; identical to cDNA glutathione reductase GI:451197
A011658_01	0	-1.105	0.156		At3g17790	acid phosphatase type 5 (ACP5) contains Pfam profile: PF00149 calcineurin-like phosphoesterase; nearly identical to acid phosphatase type 5 (GI:10278031) [Arabidopsis thaliana]
A011996_01	0	-0.271	-0.035		At3g09650	pentatricopeptide (PPR) repeat-containing protein contains Pfam profile PF01535: PPR repeat
A012079_01	0	-0.193	0		At3g26730	zinc finger (C3HC4-type RING finger) family protein contains Pfam profile: PF00097 zinc finger, C3HC4 type (RING finger)
A012086_01	0	-0.436	-0.135		At3g17000	ubiquitin-conjugating enzyme, putative similar to Non-Canonical UBiquitin Conjugating Enzyme 1 (NCUBE1) from [Gallus gallus] GI:7362937, [Mus musculus] GI:7363050, [Homo sapiens] GI:7362973; contains Pfam profile PF00179: Ubiquitin-conjugating enzyme
A012502_01	0	-0.345	0.006		At3g07870	F-box family protein contains F-box domain Pfam:PF00646
A012865_01	0	-0.789	-0.045		At4g19420	pectinacetylesterase family protein contains Pfam profile: PF03283 pectinacetylesterase
A013121_01	0	-0.419	0.072		At4g33080	protein kinase, putative contains protein kinase domain, Pfam:PF00069
A013207_01	0	-0.498	0.049		At4g34830	pentatricopeptide (PPR) repeat-containing protein contains Pfam profile PF01535: PPR repeat
A013320_01	0	-1.107	-0.426		At4g25700	beta-carotene hydroxylase identical to GI:1575296
A014042_01	0	-0.392	0.079		At4g02990	mitochondrial transcription termination factor family protein / mTERF family protein weak similarity to mtDBP protein [Paracentrotus lividus] GI:4584695; contains Pfam profile PF02536: mTERF
A014115_01	0	-0.979	-0.216		At4g28040	nodulin MtN21 family protein similar to MtN21 GI:2598575 (root nodule development) from [Medicago truncatula]
A014176_01	0	-0.536	-0.167		At4g39100	PHD finger family protein / bromo-adjacent homology (BAH) domain-containing protein contains Pfam domain, PF00628: PHD-finger and PF01426: BAH domain
A014239_01	0	-0.535	-0.24		At4g25910	nitrogen fixation protein, putative nitrogen fixation protein nifU (SP:Q43885) [Anabaena sp.]; contains Pfam profile: PF01106 NifU-like domain
A014430_01	0	-0.351	0.012		At4g02210	expressed protein
A014534_01	0	-0.546	-0.262		At4g34000	ABA-responsive element-binding protein / abscisic acid responsive elements-binding factor (ABRE) / ABA-responsive elements-binding factor (ABF3) identical to abscisic acid responsive elements-binding factor (ABF3) GI:6739280 from [Arabidopsis thaliana]; i
A014919_01	0	-0.487	-0.094		At4g38060	expressed protein
A015457_01	0	-0.353	-0.183		At4g33630	expressed protein
A016210_01	0	-0.402	0.161		At5g14780	formate dehydrogenase (FDH) identical to GI:7677266
A016226_01	0	-0.313	0.022		At5g01820	CBL-interacting protein kinase 14 (CIPK14) identical to CBL-interacting protein kinase 14 [Arabidopsis thaliana] gi|13249127|gb|AAK16689; contains Pfam profiles PF00069: Protein kinase domain and PF03822: NAF domain; identical to cDNA CBL-interacting prot
A016324_01	0	-0.976	-0.181		At5g39610	no apical meristem (NAM) family protein contains Pfam PF02365 : No apical meristem (NAM) protein; similar to cup-shaped cotyledon CUC2 (GI:1944132) [Arabidopsis thaliana]
A016404_01	0	-0.389	0.023		At5g24320	WD-40 repeat family protein contains Pfam PF00400: WD domain, G-beta repeat; similar to WD-repeat protein 5 (WD repeat protein BIG-3) (SP: Q9UGP9) [Homo sapiens]
A016406_01	0	-0.479	0.183		At5g59540	oxidoreductase, 2OG-Fe(II) oxygenase family protein similar to desacetoxyvindoline-4-hydroxylase [Catharanthus roseus] GI:2352812; contains Pfam profile PF03171: oxidoreductase, 2OG-Fe(II) oxygenase family
A016697_01	0	-0.926	-0.671		At5g02830	pentatricopeptide (PPR) repeat-containing protein contains Pfam profile PF01535: PPR repeat
A016826_01	0	-0.419	0.124		At5g03230	expressed protein contains Pfam profile PF04520: Protein of unknown function, DUF584
A017194_01	0	-0.269	0.039		At5g02710	expressed protein contains Pfam PF03692: Uncharacterised protein family (UPF0153)
A017595_01	0	-0.897	-0.466		At5g01880	zinc finger (C3HC4-type RING finger) family protein contains Pfam domain, PF00097: Zinc finger, C3HC4 type (RING finger)
A017703_01	0	-0.22	0.019		At5g50230	transducin family protein / WD-40 repeat family protein contains 7 WD-40 repeats (PF00400); similar to TIPD PROTEIN (SP:O15736)[Dictyostelium discoideum]
A017977_01	0	-0.537	0.183		At5g01520	zinc finger (C3HC4-type RING finger) family protein similar to MTD2 [Medicago truncatula] GI:9294812; contains Pfam profile PF00097: Zinc finger, C3HC4 type (RING finger)
A018239_01	0	-0.408	-0.05		At5g11950	expressed protein contains Pfam profile PF03641: decarboxylase family protein
A018289_01	0	-0.349	0.026		At5g43210	endo/excinuclease amino terminal domain-containing protein contains Pfam domain PF01541: Endo/excinuclease amino terminal domain
A018332_01	0	-1.465	-0.119		At5g42900	expressed protein similar to unknown protein (pir||T05226)
A018719_01	0	-0.66	0.041		At5g23920	expressed protein
A018815_01	0	-0.401	-0.109		At5g65990	amino acid transporter family protein similar to proton/amino acid transporter 1 [Mus musculus] GI:21908024; contains Pfam profile PF01490: Transmembrane amino acid transporter protein
A019466_01	0	-0.772	-0.249		At5g54250	cyclic nucleotide-regulated ion channel / cyclic nucleotide-gated channel (CNGC4) identical to cyclic nucleotide and calmodulin-regulated ion channel (cngc4) GI:4581203 from [Arabidopsis thaliana]
A019494_01	0	-0.424	0.118		At3g50440	hydrolase, alpha/beta fold family protein similar to ethylene-induced esterase [Citrus sinensis] GI:14279437, polyneuridine aldehyde esterase [Rauvolfia serpentina] GI:6651393; contains Pfam profile PF00561: hydrolase, alpha/beta fold family
A019513_01	0	-0.578	0.04		At4g32250	protein kinase family protein contains protein kinase domain, Pfam:PF00069
A019515_01	0	-0.424	-0.077		At4g17840	expressed protein
A019541_01	0	-0.337	-0.116		At4g32900	expressed protein
A019925_01	0	-0.411	0.195		At1g64050	expressed protein
A019985_01	0	-0.277	-0.104		At3g19800	expressed protein
A020116_01	0	-0.342	-0.057		At5g12170	expressed protein similar to unknown protein (pir||T09909)
A020194_01	0	-0.369	0.189		At3g53700	pentatricopeptide (PPR) repeat-containing protein low similarity to fertility restorer [Petunia x hybrida] GI:22128587; contains Pfam profile PF01535: PPR repeat
A020207_01	0	-1.136	-0.627		At1g20190	expansin, putative (EXP11) similar to GB:U30460 from [Cucumis sativus]; alpha-expansin gene family, PMID:11641069
A020278_01	0	-0.318	-0.12		At3g47290	phosphoinositide-specific phospholipase C family protein similar to phosphoinositide-specific phospholipase C [Nicotiana rustica] GI:1771381, 1-phosphatidylinositol-4,5-bisphosphate phosphodiesterase [Nicotiana rustica] GI:2765140; contains Pfam profiles
A020368_01	0	-0.637	-0.263		At2g31380	zinc finger (B-box type) family protein / salt tolerance-like protein (STH) contains Pfam profile PF00643: B-box zinc finger; identical to cDNA B-box zinc finger protein STH GI:12698721, SP|Q9SID1 Salt tolerance-like protein (Arabidopsis thaliana)
A020666_01	0	-0.597	0.346		At4g33150	lysine-ketoglutarate reductase/saccharopine dehydrogenase bifunctional enzyme identical to lysine-ketoglutarate reductase/saccharopine dehydrogenase GI:2052508 from [Arabidopsis thaliana]
A020952_01	0	-0.721	-0.357		At1g22640	myb family transcription factor (MYB4) similar to myb-related protein GI:1020155 from [Arabidopsis thaliana]
A021109_01	0	-1.031	-0.474		At5g53970	aminotransferase, putative similar to nicotianamine aminotransferase from Hordeum vulgare [GI:6498122, GI:6469087]; contains Pfam profile PF00155 aminotransferase, classes I and II
A021709_01	0	-1.181	-0.492		At1g49660	expressed protein
A022339_01	0	-0.301	0.025		At4g34020	DJ-1 family protein similar to CAP1 [Rattus norvegicus] GI:3250916, ThiJ protein, Escherichia coli, PIR:H64771; contains Pfam profile PF01965 ThiJ/PfpI family
A023979_01	0	-0.383	-0.061		At3g08620	KH domain-containing protein
A024372_01	0	-0.472	-0.075		At3g27020	oligopeptide transporter OPT family protein similar to iron-phytosiderophore transporter protein yellow stripe 1 [Zea mays] GI:10770865; contains Pfam profile PF03169: OPT oligopeptide transporter protein
A024478_01	0	-0.439	-0.029		At5g36160	aminotransferase-related similar to nicotianamine aminotransferase B GI:6469087 from [Hordeum vulgare subsp. vulgare]
A024675_01	0	-0.249	0.026		At4g27780	acyl-CoA binding protein 2 (ACBP2) identical to acyl-CoA binding protein 2 [Arabidopsis thaliana] gi|12039034|gb|AAG46057
A024872_01	0	-0.401	-0.022		At4g18210	purine permease family protein similar to purine permease [Arabidopsis thaliana] GI:7620007, contains Pfam profile PF03151: Domain of unknown function, DUF250
A024961_01	0	-0.425	0.053		At4g12310	cytochrome P450, putative similar to P450 monooxygenase GI:14334057 from [Gossypium arboreum ]
A025232_01	0	-0.364	0.132		At5g59530	2-oxoglutarate-dependent dioxygenase, putative similar to 2A6 (GI:599622) and tomato ethylene synthesis regulatory protein E8 (SP|P10967); 1-aminocyclopropane-1-carboxylate oxidase kidney bean, PIR:T10818
A200110_01	0	-0.526	0.225		At4g27410	no apical meristem (NAM) family protein (RD26) contains Pfam PF02365: No apical meristem (NAM) domain; Arabidopsis thaliana nap gene,PID:e1234813; identical to cDNA RD26 mRNA for NAM-like protein GI:15375403
A200159_01	0	-0.402	0.059		At5g39660	Dof-type zinc finger domain-containing protein similar to H-protein promoter binding factor-2a GI:3386546 from [Arabidopsis thaliana]
A201084_01	0	-0.622	-0.062		At1g79520	cation efflux family protein contains cation efflux family protein domain, Pfam:PF01545
A201494_01	0	-0.809	-0.148		At2g39705	expressed protein
A201585_01	0	-0.329	-0.071		At3g05935	expressed protein
A202027_01	0	-1.399	-0.682		At3g61890	homeobox-leucine zipper protein 12 (HB-12) / HD-ZIP transcription factor 12 identical to homeobox-leucine zipper protein ATHB-12 (GI:6899887) [Arabidopsis thaliana]
A202078_01	0	-0.69	-0.115		At4g02715	expressed protein
A202715_01	0	-0.876	-0.475		At5g19850	hydrolase, alpha/beta fold family protein low similarity to hydrolase [Terrabacter sp. DBF63] GI:14196240; contains Pfam profile PF00561: hydrolase, alpha/beta fold family
A202745_01	0	-0.39	-0.081		At5g20300	chloroplast outer membrane protein, putative similar to chloroplast protein import component Toc159 [Pisum sativum] GI:8489806, chloroplast outer envelope protein 86 [Pisum sativum] GI:599958, GTP-binding protein [Pisum sativum] GI:576509
A202750_01	0	-0.344	0.073		At5g20380	transporter-related low similarity to vesicular glutamate transporter 3 [Rattus norvegicus] GI:21685382
A202833_01	0	-0.594	-0.145		At5g24870	zinc finger (C3HC4-type RING finger) family protein similar to Pfam domain, PF00097: Zinc finger, C3HC4 type (RING finger)
A202864_01	0	-0.405	0.227		At5g25350	F-box family protein contains Pfam PF00646: F-box domain and Pfam PF00560: Leucine Rich Repeat (6 copies); similar to F-box protein FBL6 (GI:4432860) [Homo sapiens]
A202865_01	0	-0.344	-0.122		At5g25360	expressed protein
A202946_01	0	-0.473	-0.097		At5g27320	expressed protein similar to PrMC3 [Pinus radiata] GI:5487873
At30000987	0	-0.355	0.119		At1g09480	cinnamyl-alcohol dehydrogenase family / CAD family similar to cinnamyl alcohol dehydrogenase, Eucalyptus gunnii [gi:1143445], CPRD14 protein, Vigna unguiculata [gi:1854445]
At30000990	0	-0.962	0.145		At1g09500	cinnamyl-alcohol dehydrogenase family / CAD family similar to cinnamyl alcohol dehydrogenase, Eucalyptus gunnii [gi:1143445], CPRD14 protein, Vigna unguiculata [gi:1854445]
At30001244	0	-0.218	0.022		At1g11650	RNA-binding protein 45 (RBP45), putative similar to gb|U90212 DNA binding protein ACBF from Nicotiana tabacum and contains 3 PF|00076 RNA recognition motif domains. ESTs gb|T44278, gb|R65195, gb|N65904, gb|H37499, gb|R90487, gb|N95952, gb|T44278, gb|Z2016
At30001661	0	-0.484	0.188		At1g15350	expressed protein
At30002312	0	-0.533	-0.013		At1g21410	F-box family protein similar to SKP1 interacting partner 2 (SKIP2) TIGR_Ath1:At5g67250
At30004573	0	-0.401	0.043		At1g52855	expressed protein
At30004824	0	-0.353	0.184		At1g55060	polyubiquitin (UBQ12) identical to polyubiquitin (ubq12) gene sequence GI:304121 from [Arabidopsis thaliana]
At30006467	0	-0.23	0.02		At1g71860	protein tyrosine phosphatase 1 (PTP1) identical to protein tyrosine phosphatase 1 GI:3170531 from [Arabidopsis thaliana]; contains Pfam profile: PF00102 protein-tyrosine phosphatase
At30006801	0	-0.296	-0.071		At1g74910	ADP-glucose pyrophosphorylase family protein contains Pfam profile PF00483: Nucleotidyl transferase; low similarity to mannose-1-phosphate guanylyltransferase [Hypocrea jecorina] GI:3323397
At30010257	0	-1.161	-0.467		At2g32530	cellulose synthase family protein similar to cellulose synthase catalytic subunit from Arabidopsis thaliana [gi:5230423], cellulose synthase-5 from Zea mays [gi:9622882]
At30010258	0	-0.651	-0.307		At2g32540	cellulose synthase family protein similar to cellulose synthase catalytic subunit from Arabidopsis thaliana [gi:5230423], cellulose synthase-5 from Zea mays [gi:9622882]
At30010870	0	-0.458	0.004		At2g37760	aldo/keto reductase family protein similar to chalcone reductase [Sesbania rostrata][GI:2792155], and aldose reductase ALDRXV4 [Xerophyta viscosa][GI:4539944], [Hordeum vulgare][GI:728592]
At30010872	0	-0.423	0.044		At2g37760	aldo/keto reductase family protein similar to chalcone reductase [Sesbania rostrata][GI:2792155], and aldose reductase ALDRXV4 [Xerophyta viscosa][GI:4539944], [Hordeum vulgare][GI:728592]
At30012052	0	-0.456	0.124		At2g47910	expressed protein
At30012094	0	-0.82	-0.466		At3g01060	expressed protein
At30012481	0	-0.359	-0.051		At3g04350	expressed protein
At30012507	0	-0.289	0.039		At3g04590	DNA-binding family protein contains a AT hook motif (DNA binding motifs with a preference for A/T rich regions), Pfam:PF02178
At30015201	0	-0.573	-0.004		At3g28100	nodulin MtN21 family protein similar to MtN21 [Medicago truncatula] GI:2598575
At30015204	0	-0.564	-0.176		At3g28130	nodulin MtN21 family protein similar to MtN21 GI:2598575 (root nodule development) from [Medicago truncatula]
At30015326	0	-0.446	-0.047		At3g29200	chorismate mutase, chloroplast (CM1) identical to chorismate mutase GB:Z26519 [SP|P42738] [Arabidopsis thaliana]
At30016794	0	-2.827	-0.892		At3g53980	protease inhibitor/seed storage/lipid transfer protein (LTP) family protein contains Pfam protease inhibitor/seed storage/LTP family domain PF00234
At30022022	0	-0.396	-0.131		At4g38060	expressed protein
At30022331	0	-0.69	-0.05		At5g01520	zinc finger (C3HC4-type RING finger) family protein similar to MTD2 [Medicago truncatula] GI:9294812; contains Pfam profile PF00097: Zinc finger, C3HC4 type (RING finger)
At30022388	0	-0.887	-0.207		At5g02020	expressed protein
At30022389	0	-0.721	-0.076		At5g02020	expressed protein
At30023352	0	-1.641	-0.978		At5g10930	CBL-interacting protein kinase 5 (CIPK5) identical to CBL-interacting protein kinase 5 GP|9280632|gb|AAF86504 [Arabidopsis thaliana]
At30024512	0	-0.389	-0.037		At5g22290	no apical meristem (NAM) family protein contains Pfam PF02365: No apical meristem (NAM) domain
At30026142	0	-1.23	-0.409		At5g42900	expressed protein similar to unknown protein (pir||T05226)
At30026143	0	-1.212	-0.55		At5g42900	expressed protein similar to unknown protein (pir||T05226)
At30027636	0	-0.644	0.073		At5g55970	zinc finger (C3HC4-type RING finger) family protein contains Pfam profile: PF00097 zinc finger, C3HC4 type (RING finger)
At30027789	0	-0.306	0.103		At5g57340	expressed protein
At30028076	0	-0.66	-0.013		At5g59780	myb family transcription factor (MYB59) contains PFAM profile: myb DNA binding domain PF00249
A012540_01	0	-0.619	-0.288		At3g54650	F-box family protein (FBL17) contains similarity to F-box protein FBL2 GI:6010699 from [Rattus norvegicus]
A016960_01	0	-0.251	0.082		At5g02880	HECT-domain-containing protein / ubiquitin-transferase family protein / armadillo/beta-catenin-like repeat-containing protein similar to SP|Q14669 Thyroid receptor interacting protein 12 (TRIP12) {Homo sapiens}; contains Pfam profiles PF00632: HECT-domain
A017717_01	0	-0.947	-0.364		At5g47610	zinc finger (C3HC4-type RING finger) family protein contains Pfam profile: PF00097 zinc finger, C3HC4 type (RING finger)
A017857_01	0	-0.405	-0.092		At5g16610	expressed protein
A022485_01	0	-0.385	-0.05		At4g11110	WD-40 repeat family protein / phytochrome A-related contains 7 WD-40 repeats (PF00400); similar to phytochrome A supressor spa1 (GI:4809171) [Arabidopsis thaliana]; contains non-consensus (GC) donor splice sites at introns 4 and 6

## Sheet: SOM4 Up
Oligo ID	Mock	TEV	TEV-At		Gene	Annotation
A000002_01	0	0.003	0.379		At1g26110	expressed protein
A000025_01	0	0.032	0.361		At1g11650	RNA-binding protein 45 (RBP45), putative similar to gb|U90212 DNA binding protein ACBF from Nicotiana tabacum and contains 3 PF|00076 RNA recognition motif domains.
A000400_01	0	0.11	0.378		At1g32400	senescence-associated family protein contains Pfam profile PF00335: Tetraspanin family
A001098_01	0	-0.134	0.186		At1g35780	expressed protein
A001154_01	0	-0.234	0.186		At1g21780	BTB/POZ domain-containing protein Contains similarity to gb|AJ000644 SPOP (speckle-type POZ protein) from Homo sapiens and contains a PF|00651 BTB/POZ domain. ESTs gb|T75841, gb|R89974, gb|R30221, gb|N96386, gb|T76457, gb|AI100013 and gb|T76456 come from
A001212_01	0	-0.066	0.596		At1g56220	dormancy/auxin associated family protein similar to Auxin-repressed 12.5 kDa protein (Swiss-Prot:Q05349) [Fragaria ananassa]; similar to auxin-repressed protein (GI:927034) [Fragaria x ananassa]; similar to dormancy-associated protein (GI:2605887) [Pisum
A001313_01	0	-0.391	0.307		At1g80130	expressed protein
A001426_01	0	-0.182	0.192		At1g17210	expressed protein distantly related to dentin phosphoryn [Homo sapiens] (GI:4322670)
A001495_01	0	-0.231	0.643		At1g52890	no apical meristem (NAM) family protein contains Pfam PF02365: No apical meristem (NAM) domain; similar to NAM (no apical meristem) GB:CAA63101 from [Petunia x hybrida]
A001513_01	0	0.132	0.467		At1g09620	tRNA synthetase class I (I, L, M and V) family protein similar to cytosolic leucyl-tRNA synthetase [Candida albicans] GI:9858190; contains Pfam profile PF00133: tRNA synthetases class I (I, L, M and V)
A001695_01	0	0.089	0.555		At1g77480	nucellin protein, putative similar to nucellin GB:AAB96882 GI:2290202 [Hordeum vulgare] (nucellin: similar to aspartic protease and its specific expression in nucellar cells during degeneration)
A001870_01	0	0.224	0.466		At1g73180	eukaryotic translation initiation factor-related similar to eukaryotic translation initiation factor 2A (GI:21956484) [Homo sapiens]; similar to Eukaryotic translation initiation factor 3 subunit 9 (eIF-3 eta) (eIF3 p116) (eIF3 p110) (eIF3b) (Swiss-Prot:P
A001975_01	0	0.009	0.315		At1g64550	ABC transporter family protein similar to ABC transporter protein GB:AAF31030 GI:6899653 from [Leishmania major]
A002008_01	0	-0.135	0.611		At1g47960	invertase/pectin methylesterase inhibitor family protein low similarity to SP|P83326 Pectinesterase inhibitor (Pectin methylesterase inhibitor) (PMEI) {Actinidia chinensis}; contains Pfam profile PF04043: Plant invertase/pectin methylesterase inhibitor
A002089_01	0	0.03	0.336		At1g80930	MIF4G domain-containing protein / MA3 domain-containing protein similar to SP|Q9P6R9 Cell cycle control protein cwf22 {Schizosaccharomyces pombe}; contains Pfam profiles PF02854: MIF4G domain, PF02847: MA3 domain
A002135_01	0	0.037	0.254		At1g65280	DNAJ heat shock N-terminal domain-containing protein contains Pfam profile PF00226 DnaJ domain
A002178_01	0	0.192	0.491		At1g16040	expressed protein similar To Phosphatidylinositol-glycan biosynthesis, class F protein (PIG-F). (Mouse) (SP:O09101) [Mus musculus]; contains six transmembrane domains;
A002638_01	0	-0.149	0.414		At1g78930	mitochondrial transcription termination factor-related / mTERF-related contains Pfam profile PF02536: mTERF
A002733_01	0	-0.235	0.201		At1g15400	expressed protein ESTs gb|H37295 and gb|R64895 come from this gene
A002839_01	0	-0.298	0.574		At1g36060	AP2 domain-containing transcription factor, putative similar to AP2 domain transcription factor GI:4567204 from [Arabidopsis thaliana]
A002934_01	0	0.083	0.229		At1g80000	expressed protein identical to unknown protein GB:AAD55481 [Arabidopsis thaliana]
A003054_01	0	0.187	0.517		At1g16810	expressed protein
A003384_01	0	-0.079	0.21		At1g71140	MATE efflux family protein similar to ripening regulated protein DDTFR18 [Lycopersicon esculentum] GI:12231296; contains Pfam profile PF01554: Uncharacterized membrane protein family
A003567_01	0	-0.197	0.714		At1g64660	Cys/Met metabolism pyridoxal-phosphate-dependent enzyme family protein similar to SP|P13254 Methionine gamma-lyase (EC 4.4.1.11) (L-methioninase) {Pseudomonas putida}; contains Pfam profile PF01053: Cys/Met metabolism PLP-dependent enzyme
A003671_01	0	-0.128	0.143		At1g13450	DNA binding protein GT-1 identical to DNA binding protein GT-1 GI:598073 from [Arabidopsis thaliana]
A003898_01	0	0.082	0.515		At1g23780	F-box family protein contains Pfam PF00646: F-box domain; similar to SP:Q9Y3I1 F-box only protein 7 {Homo sapiens}; similar to SKP1 interacting partner 2 (SKIP2) TIGR_Ath1:At5g67250
A004214_01	0	-0.192	0.303		At1g29400	RNA recognition motif (RRM)-containing protein similar to GI:6650523 from [Arabidopsis thaliana]
A004263_01	0	0	0.42		At1g73820	Ssu72-like family protein contains Pfam profile PF04722: Ssu72-like protein; similar to SSU72 protein (Swiss-Prot:P53538) [Saccharomyces cerevisiae]
A004431_01	0	0.002	0.617		At1g08630	L-allo-threonine aldolase-related similar to L-allo-threonine aldolase (EC 4.1.2.-) (L-allo-TA) (L-allo-threonine acetaldehyde-lyase) (SP:O07051) {Aeromonas jandaei}; similar to ESTs gb|R30517, gb|T42772, gb|R90493, and gb|R90493
A004469_01	0	-0.077	0.303		At1g08230	amino acid transporter family protein low similarity to amino acid permease [Oryza sativa] GI:7415521; contains Pfam profile PF01490: Transmembrane amino acid transporter protein
A004596_01	0	0.109	0.319		At1g68070	zinc finger (C3HC4-type RING finger) family protein very low similarity to RING-H2 finger protein RHG1a [Arabidopsis thaliana] GI:3822225; contains Pfam profile: PF00097 zinc finger, C3HC4 type (RING finger)
A004598_01	0	0.106	0.347		At1g28200	GRAM domain-containing protein / ABA-responsive protein-related similar to ABA-responsive protein [Hordeum vulgare] GI:4103635; contains Pfam profile PF02893: GRAM domain
A004629_01	0	0.054	0.603		At1g24370	hypothetical protein contains Pfam profiles PF04776: Protein of unknown function (DUF626), PF04827: Protein of unknown function (DUF635)
A005439_01	0	0.076	0.366		At3g51870	mitochondrial substrate carrier family protein peroxisomal Ca-dependent solute carrier - Oryctolagus cuniculus, EMBL:AF004161
A005634_01	0	0.098	0.646		At5g21160	La domain-containing protein / proline-rich family protein contains proline-rich extensin domains, INTERPRO:IPR002965, PF05383: La domain
A005885_01	0	-0.02	0.189		At1g49590	formin-binding protein-related similar to formin binding protein 21 (GI:3550080) [Homo sapiens]; similar to formin binding protein 21 (GI:3550077) [Mus musculus]; similar to Dinap1-interacting protein 1 (GI:8745458) [Crypthecodinium cohnii]
A005955_01	0	0.215	0.425		At3g16190	isochorismatase hydrolase family protein low similarity to SP|P32400 N-carbamoylsarcosine amidase (EC 3.5.1.59) (N-carbamoylsarcosine amidohydrolase) {Arthrobacter sp}; contains Pfam profile PF00857: isochorismatase family protein
A006030_01	0	0.115	0.604		At2g40880	cysteine protease inhibitor, putative / cystatin, putative (FL3-27) similar to PRLI-interacting factor M [Arabidopsis thaliana] GI:11139270, cysteine proteinase inhibitor [Brassica rapa] GI:762785; contains Pfam profile PF00031: Cystatin domain
A006379_01	0	0.15	0.4		At2g02740	transcription factor, putative similar to DNA-binding protein p24 [Solanum tuberosum] GI:9651810, Plant Transcriptional Regulator Pbf-2 [Solanum tuberosum] (GI:21730639, GI:21730638, GI:21730640, GI:21730637)
A006422_01	0	0.122	0.589		At2g18950	homogentisate phytylprenyltransferase family protein (HPT1) / tocopherol phytyltransferase family protein (TPT1) identical to gi:17104828; contains Pfam profile PF01040: UbiA prenyltransferase family; identical to cDNA tocopherol polyprenyltransferase (TP
A006794_01	0	0.058	0.277		At2g01060	myb family transcription factor contains Pfam profile: PF00249 myb-like DNA-binding domain
A006797_01	0	-0.184	0.116		At2g23070	casein kinase II alpha chain, putative similar to casein kinase II, alpha chain (CK II) [Zea mays] SWISS-PROT:P28523; contains protein kinase domain, Pfam:PF00069
A006857_01	0	0.167	0.365		At2g34520	ribosomal protein S14 mitochondrial family protein identical to ribosomal protein S14 {Arabidopsis thaliana} NCBI_gi:4583554
A006885_01	0	-0.055	0.378		At2g02710	PAC motif-containing protein similar to nonphototropic hypocotyl 1 [Zea mays] GI:2687358; contains Pfam profile PF00785: PAC motif
A006952_01	0	0.025	0.346		At2g13840	PHP domain-containing protein contains Pfam PF02231: PHP domain N-terminal region and Pfam PF02811: PHP domain C-terminal region; identical to Protein trpH. (Swiss-Prot:O54453) [Salmonella typhimurium]
A006970_01	0	0.213	0.482		At2g19870	tRNA/rRNA methyltransferase (SpoU) family protein similar to SP|P25270 Ribose methyltransferase PET56 (EC 2.1.1.-) {Saccharomyces cerevisiae}; contains Pfam profile PF00588: SpoU rRNA Methylase (RNA methyltransferase, TrmH) family
A007045_01	0	0.065	0.426		At2g01440	ATP-dependent DNA helicase, putative
A007075_01	0	-0.252	0.2		At2g21180	expressed protein
A007132_01	0	0.191	0.551		At2g21240	expressed protein
A007275_01	0	0.253	0.447		At2g01540	C2 domain-containing protein similar to zinc finger and C2 domain protein GI:9957238 from [Arabidopsis thaliana]
A007696_01	0	-0.318	0.513		At2g39400	hydrolase, alpha/beta fold family protein similar to monoglyceride lipase from [Homo sapiens] GI:14594904, [Mus musculus] GI:2632162; contains Pfam profile PF00561: hydrolase, alpha/beta fold family
A007862_01	0	0.151	0.522		At2g43650	Sas10/U3 ribonucleoprotein (Utp) family protein contains Pfam profile PF04000: Sas10/Utp3 family; contains Prosite PS00761: Signal peptidases I signature 3; weak similarity to PEBP2 beta-binding protein / charged amino acid rich leucine zipper factor-1 (G
A007867_01	0	0.095	0.545		At2g36900	Golgi SNARE protein membrin 11 (MEMB11) / Golgi SNAP receptor complex member 2-1 identical to SP:Q9SJL6; identical to Probable 27 kDa Golgi SNARE protein (Golgi SNAP receptor complex member 2) (SP:Q9SJL6) [Arabidopsis thaliana]
A007901_01	0	0.222	0.456		At2g27860	expressed protein
A008108_01	0	-0.237	0.258		At2g43060	expressed protein similar to cDNA bHLH transcription factor (bHLH zeta gene) GI:32563005
A008214_01	0	-0.021	0.293		At2g07000	expressed protein
A008500_01	0	-0.238	0.14		At2g35940	homeodomain-containing protein contains 'Homeobox' domain signature, Prosite:PS00027
A008604_01	0	-0.21	0.14		At2g37340	splicing factor RSZ33 (RSZ33) nearly identical to splicing factor RSZ33 [Arabidopsis thaliana] GI:9843663; contains Pfam profiles PF00076: RNA recognition motif. (a.k.a. RRM, RBD, or RNP domain), PF00098: Zinc knuckle
A008794_01	0	0.105	0.351		At2g34750	RNA polymerase I specific transcription initiation factor RRN3 family protein contains Pfam PF05327: RNA polymerase I specific transcription initiation factor RRN3; similar to RRN3 (GI:7670100) [Homo sapiens] similar to RNA polymerase I specific transcrip
A008840_01	0	0.142	0.562		At2g45620	nucleotidyltransferase family protein low similarity to SP|O13833| Caffeine-induced death protein 1 {Schizosaccharomyces pombe}; contains Pfam profiles PF03828: PAP/25A associated domain, PF01909: Nucleotidyltransferase domain
A009139_01	0	-0.103	0.778		At3g51600	nonspecific lipid transfer protein 5 (LTP5) identical to SP|Q9XFS7 Nonspecific lipid-transfer protein 5 (LTP 5) {Arabidopsis thaliana}
A009205_01	0	-0.04	0.421		At3g01470	homeobox-leucine zipper protein 5 (HAT5) / HD-ZIP protein 5 / HD-ZIP protein (HB-1) identical to homeobox-leucine zipper protein HAT5 (HD-ZIP protein 5) (HD-ZIP protein ATHB-1) GB:Q02283 [Arabidopsis thaliana]
A009535_01	0	-0.448	0.497		At3g49790	expressed protein predicted protein, Arabidopsis thaliana
A010200_01	0	0.041	0.394		At3g03880	expressed protein
A010262_01	0	-0.009	0.357		At3g53970	proteasome inhibitor-related similar to proteasome inhibitor PI31 subunit (hPI31) SP:Q92530 from [Homo sapiens]
A010318_01	0	-0.142	0.378		At3g51730	saposin B domain-containing protein contains Pfam profiles: PF00026 eukaryotic aspartyl protease, PF03489 surfactant protein B, PF05184 saposin-like type B, region 1
A010682_01	0	0.151	0.609		At3g58180	PBS lyase HEAT-like repeat-containing protein contains Pfam profile: PF03130: PBS lyase HEAT-like repeat; contains alternative donor splice site TT at exon 2,hypothetical protein C14A4.1 - Caenorhabditis elegans, PIR:T19243
A010696_01	0	-0.19	0.136		At3g04520	threonine aldolase family protein similar to L-allo-threonine aldolase SP:O07051 from [Aeromonas jandaei]
A010893_01	0	0.129	0.346		At3g15290	3-hydroxybutyryl-CoA dehydrogenase, putative similar to S(+)-beta-hydroxybutyryl CoA dehydrogenase (3-hydroxybutyryl-CoA dehydrogenase) [Paracoccus denitrificans] GI:12003356; contains Pfam profiles PF02737: 3-hydroxyacyl-CoA dehydrogenase NAD binding, PF
A011301_01	0	0.172	0.417		At3g26080	plastid-lipid associated protein PAP / fibrillin family protein low similarity to Plastid-lipid-Associated Protein [Nicotiana tabacum] GI:2632088; contains Pfam profile PF04755: PAP_fibrillin
A011649_01	0	-0.022	0.306		At3g10770	expressed protein
A011677_01	0	-0.006	0.285		At3g45600	senescence-associated family protein similar to senescence-associated protein 5 [Hemerocallis hybrid cultivar] gi|3551954|gb|AAC34855
A011717_01	0	-0.1	0.436		At3g11830	chaperonin, putative similar to SWISS-PROT:P80313 T-complex protein 1, eta subunit (TCP-1-eta) [Mus musculus]; contains Pfam:PF00118 domain, TCP-1/cpn60 chaperonin family
A011743_01	0	-0.251	0.26		At3g19290	ABA-responsive element-binding protein 2 (AREB2) almost identical (one amino acid) to GB:AAF27182 from (Arabidopsis thaliana); contains Pfam profile PF00170:bZIP transcription factor; identical to cDNA abscisic acid responsive elements-binding factor (ABR
A011912_01	0	-0.15	0.58		At3g45300	isovaleryl-CoA-dehydrogenase (IVD) identical to isovaleryl-CoA-dehydrogenase precursor [Arabidopsis thaliana] GI:5596622
A011977_01	0	0.135	0.566		At3g54380	SAC3/GANP family protein contains Pfam profile: PF03399 SAC3/GANP family
A012171_01	0	0.009	0.367		At3g04780	expressed protein
A012219_01	0	0.17	0.358		At3g01740	expressed protein
A012256_01	0	-0.696	1.192		At3g10320	expressed protein contains Pfam domain, PF04577: Protein of unknown function (DUF563)
A012310_01	0	-0.191	0.184		At3g08700	ubiquitin-conjugating enzyme, putative strong similar to ubiquitin-conjugating enzymes E2-17 from [Arabidopsis thaliana] SP|P35134, SP|P35132, SP|P35133; contains Pfam profile PF00179: Ubiquitin-conjugating enzyme
A012359_01	0	0.198	0.52		At3g26618	eukaryotic release factor 1 family protein / eRF1 family protein contains Pfam profiles: PF03463 eRF1 domain 1, PF03464 eRF1 domain 2, PF03465 eRF1 domain 3
A012533_01	0	0.26	0.547		At3g54760	dentin sialophosphoprotein-related contains weak similarity to Swiss-Prot:Q9NZW4 dentin sialophosphoprotein precursor (Dentin phosphophoryn DPP, Dentin sialoprotein DSP) [Homo sapiens]
A012572_01	0	-0.228	0.144		At3g06510	glycosyl hydrolase family 1 protein similar to Beta-galactosidase (SP:P22498) [Sulfolobus solfataricus}; almost identical to beta-glucosidase GB:AAF23823 GI:6685165 from [Arabidopsis thaliana]
A012706_01	0	-0.249	0.164		At3g29090	pectinesterase family protein similar to pectinesterase precursor GB:Q43043 [Petunia integrifolia]; contains Pfam profile: PF01095 pectinesterase
A012801_01	0	-0.046	0.252		At3g16740	F-box family protein contains F-box domain Pfam:PF00646
A013212_01	0	-0.007	0.292		At4g15490	UDP-glucoronosyl/UDP-glucosyl transferase family protein contains Pfam profile: PF00201 UDP-glucoronosyl and UDP-glucosyl transferase ;simalr to UDP-glucose:sinapate glucosyltransferase GI:9794913 from [Brassica napus]
A013363_01	0	-0.096	0.537		At4g13250	short-chain dehydrogenase/reductase (SDR) family protein contains INTERPRO family IPR002198 Short-chain dehydrogenase/reductase (SDR) superfamily
A013421_01	0	-0.134	0.153		At4g32520	glycine hydroxymethyltransferase, putative / serine hydroxymethyltransferase, putative / serine/threonine aldolase, putative similar to serine hydroxymethyltransferase [Chlamydomonas reinhardtii] GI:17066746; contains Pfam profile PF00464: serine hydroxym
A013634_01	0	0.11	0.408		At4g36720	abscisic acid-responsive HVA22 family protein low similarity to SP|Q00765 Polyposis locus protein 1 (TB2 protein) {Homo sapiens}; contains Pfam profile PF03134: TB2/DP1, HVA22 family
A013662_01	0	-0.228	0.168		At4g33240	phosphatidylinositol-4-phosphate 5-kinase family protein similar to SP|Q9Z1T6 FYVE finger-containing phosphoinositide kinase (EC 2.7.1.68) (1- phosphatidylinositol-4-phosphate kinase) (PIP5K) (PtdIns(4)P-5-kinase) {Mus musculus}; contains Pfam profiles PF
A013721_01	0	-0.287	0.132		At4g39140	expressed protein
A013805_01	0	-0.01	0.369		At4g21980	autophagy 8a (APG8a) identical to autophagy 8a [Arabidopsis thaliana] GI:19912151; contains Pfam profile PF02991: Microtubule associated protein 1A/1B, light chain 3
A014304_01	0	-0.168	0.316		At4g29110	hypothetical protein
A014596_01	0	-0.006	0.467		At4g19410	pectinacetylesterase, putative similar to pectinacetylesterase precursor GI:1431629 from [Vigna radiata]
A014699_01	0	-0.121	0.213		At4g33090	aminopeptidase M similar to SP|Q11011 Puromycin-sensitive aminopeptidase (EC 3.4.11.-) (PSA) {Mus musculus}; contains Pfam profile PF01433: Peptidase family M1
A014707_01	0	-0.164	0.238		At4g15780	synaptobrevin-related family protein similar to Vesicle-associated membrane protein 722 (AtVAMP722) Synaptobrevin-related protein 1 (SP:P47192) {Arabidopsis thaliana}
A014798_01	0	0.054	0.455		At4g14430	enoyl-CoA hydratase/isomerase family protein low siimilarity to 2-cyclohexenylcarbonyl CoA isomerase [Streptomyces collinus] GI:8133118, enoyl-CoA isomerase [Escherichia coli] GI:2764829; contains Pfam profile PF00378 enoyl-CoA hydratase/isomerase family
A015257_01	0	0.205	0.456		At4g34450	coatomer gamma-2 subunit, putative / gamma-2 coat protein, putative / gamma-2 COP, putative similar to SP|Q9UBF2 Coatomer gamma-2 subunit (Gamma-2 coat protein) (Gamma-2 COP) {Homo sapiens}; contains Pfam profile: PF01602 Adaptin N terminal region
A015279_01	0	-0.119	0.512		At4g16690	esterase/lipase/thioesterase family protein similar to ethylene-induced esterase [Citrus sinensis] GI:14279437, polyneuridine aldehyde esterase [Rauvolfia serpentina] GI:6651393, SP|Q40708 PIR7A protein {Oryza sativa}; contains Interpro entry IPR000379
A015404_01	0	0.189	0.567		At4g27000	RNA-binding protein 45 (RBP45), putative DNA binding protein ACBF - Nicotiana tabacum, PID:g1899188
A015504_01	0	-0.312	0.293		At5g11090	serine-rich protein-related contains some similarity to serine-rich proteins
A015573_01	0	-0.124	0.428		At5g07950	expressed protein ferredoxin (2Fe-2S), Arabidopsis thaliana, PIR:B71412
A015678_01	0	-0.021	0.213		At5g10070	RNase L inhibitor protein-related contains Pfam profiles PF04034: Domain of unknown function (DUF367), PF04068: Possible metal-binding domain in RNase L inhibitor, RLI
A015776_01	0	-0.016	0.369		At5g41350	zinc finger (C3HC4-type RING finger) family protein contains Pfam profile: PF00097 zinc finger, C3HC4 type (RING finger)
A015805_01	0	0.146	0.569		At5g52820	WD-40 repeat family protein / notchless protein, putative similar to notchless [Xenopus laevis] GI:3687833; contains Pfam PF00400: WD domain, G-beta repeat (8 copies)
A016052_01	0	-0.128	0.154		At5g52040	arginine/serine-rich splicing factor RSP41 (RSP41) nearly identical to SP|P92966 Arginine/serine-rich splicing factor RSP41 {Arabidopsis thaliana}
A016193_01	0	-0.345	0.976		At5g01600	ferritin 1 (FER1) identical to ferritin [Arabidopsis thaliana] GI:1246401, GI:8163920
A016197_01	0	-0.041	0.194		At5g44200	nuclear cap-binding protein, putative similar to SP|P52298 20 kDa nuclear cap binding protein (CBP20) (NCBP interacting protein 1) {Homo sapiens}; non-consensus AT donor splice site at exon 4, AC acceptor splice site at exon 5; contains InterPro entry IPR
A016351_01	0	-0.199	0.096		At5g47180	vesicle-associated membrane family protein / VAMP family protein similar to VAP27 GI:6688926 [Nicotiana plumbaginifolia], to VAMP-associated protein B GI:4240464 [Rattus norvegicus] and to Vesicle-associated membrane protein/synaptobrevin binding protein
A016483_01	0	-0.08	0.324		At5g59950	RNA and export factor-binding protein, putative
A016516_01	0	0.015	0.433		At5g47690	expressed protein
A016540_01	0	0.197	0.515		At5g06450	expressed protein
A016545_01	0	-0.227	0.278		At5g52660	myb family transcription factor contains PFAM profile: PF00249 myb-like DNA-binding domain
A016937_01	0	-0.341	0.213		At5g64570	glycosyl hydrolase family 3 protein
A016946_01	0	-0.036	0.42		At5g11520	aspartate aminotransferase, chloroplast / transaminase A (ASP3) (YLS4) identical to SP|P46644 Aspartate aminotransferase, chloroplast precursor (EC 2.6.1.1) (Transaminase A) {Arabidopsis thaliana}; identical to cDNA YLS4 mRNA for aspartate aminotransferas
A016955_01	0	0.131	0.407		At5g38895	zinc finger (C3HC4-type RING finger) family protein contains Pfam profile: PF00097 zinc finger, C3HC4 type (RING finger)
A017066_01	0	0.022	0.466		At5g35330	methyl-CpG-binding domain-containing protein similar to methyl-CpG binding protein MBD4 [Mus musculus] GI:3800807; contains Pfam profile PF01429: Methyl-CpG binding domain
A017227_01	0	0.07	0.563		At5g06360	ribosomal protein S8e family protein contains Pfam profile PF01201: Ribosomal protein S8e
A017284_01	0	-0.209	0.527		At5g40690	expressed protein
A017384_01	0	0.223	0.493		At5g37055	zinc finger (HIT type) family protein contains Pfam profile: PF04438 HIT zinc finger
A017527_01	0	-0.112	0.41		At5g64430	octicosapeptide/Phox/Bem1p (PB1) domain-containing protein contains Pfam profile PF00564: PB1 domain
A017934_01	0	-0.067	0.26		At5g47880	eukaryotic peptide chain release factor subunit 1-1 (ERF1-1) identical to SP|Q39097 Eukaryotic peptide chain release factor subunit 1-1 (eRF1-1) (Eukaryotic release factor 1-1) (Omnipotent suppressor protein 1 homolog 1) (SUP1 homolog 1) {Arabidopsis thal
A017975_01	0	0.141	0.491		At5g49980	transport inhibitor response protein, putative E3 ubiquitin ligase SCF complex F-box subunit; similar to F-box containing protein TIR1 GI:13249030 from [Populus tremula x Populus tremuloides]
A018068_01	0	-0.211	0.172		At5g65110	acyl-CoA oxidase (ACX2) identical to acyl-CoA oxidase [Arabidopsis thaliana] GI:3044212
A018159_01	0	-0.075	0.587		At5g24160	squalene monooxygenase 1,2 / squalene epoxidase 1,2 (SQP1,2) identical to SP|O65402
A018314_01	0	0.023	0.28		At5g13570	MutT/nudix family protein similar to mRNA-decapping enzyme [Homo sapiens] GI:23268269; contains Pfam profile PF00293: NUDIX domain
A018348_01	0	-0.255	0.222		At5g56550	expressed protein
A018561_01	0	0.103	0.438		At5g64270	splicing factor, putative similar to splicing factor 3B subunit 1 (Spliceosome associated protein 155) (SAP 155) (SF3b155) (Pre-mRNA splicing factor SF3b 155 kDa subunit) (146 kDa nuclear protein) SP:O57683 from [Xenopus laevis]
A018604_01	0	0.104	0.534		At5g14800	pyrroline-5-carboxylate reductase identical to pyrroline-5-carboxylate reductase SP:P54904 from [Arabidopsis thaliana]
A018807_01	0	-0.08	0.233		At5g40200	DegP protease, putative contains similarity to DegP2 protease GI:13172275 from [Arabidopsis thaliana]
A018904_01	0	-0.101	0.329		At5g58575	expressed protein
A018925_01	0	-0.116	0.505		At5g46180	ornithine aminotransferase, putative / ornithine--oxo-acid aminotransferase, putative similar to SP|Q92413 Ornithine aminotransferase (EC 2.6.1.13) (Ornithine--oxo-acid aminotransferase) [Aspergillus nidulans] {Emericella nidulans}; contains Pfam profile
A018952_01	0	0.098	0.673		At5g39590	expressed protein
A018964_01	0	-0.003	0.401		At5g56180	actin-related protein, putative (ARP8) strong similarity to actin-related protein 8A (ARP8) [Arabidopsis thaliana] GI:21427473; contains Pfam profile PF00022: Actin; supporting cDNA gi|21427470|gb|AF507916.1|
A018974_01	0	-0.304	0.171		At5g23340	expressed protein
A019281_01	0	0.058	0.417		At5g14420	copine-related low similarity to SP|Q99829 Copine I {Homo sapiens}
A019331_01	0	0.043	0.585		At5g14940	proton-dependent oligopeptide transport (POT) family protein contains Pfam profile: PF00854 POT family
A019361_01	0	0.089	0.344		At5g16680	PHD finger family protein contains Pfam domain, PF00628: PHD-finger
A019512_01	0	0.031	0.692		At4g32340	expressed protein
A019553_01	0	-0.267	0.134		At4g40050	expressed protein
A019580_01	0	-0.115	0.202		At4g01410	harpin-induced family protein / HIN1 family protein / harpin-responsive family protein similar to harpin-induced protein hin1 ( GI:1619321) [Nicotiana tabacum]
A019928_01	0	0.005	0.378		At1g64490	expressed protein
A019997_01	0	0.123	0.317		At5g54900	RNA-binding protein 45 (RBP45), putative contains similarity to polyadenylate-binding protein 5
A020210_01	0	-0.022	0.369		At1g31970	DEAD/DEAH box helicase, putative similar to p68 RNA helicase [Schizosaccharomyces pombe] GI:173419
A020351_01	0	-0.189	0.16		At2g21210	auxin-responsive protein, putative similar to small auxin-up regulated protein SAUR (GI:3043536) [Raphanus sativus]
A020589_01	0	-0.201	0.414		At5g65210	bZIP family transcription factor (TGA1) identical to transcription factor (TGA1) GI:16550 from [Arabidopsis thaliana]
A020617_01	0	-0.185	0.355		At1g54100	aldehyde dehydrogenase, putative / antiquitin, putative strong similarity to SP|Q41247 Aldehyde dehydrogenase family 7 member A1 (EC 1.2.1.3) (Antiquitin 1) (Brassica turgor-responsive/drought-induced gene 26 protein) (Btg-26) {Brassica napus}; similar to
A020661_01	0	0.201	0.454		At3g02220	expressed protein
A020693_01	0	-0.195	0.148		At3g62650	expressed protein putative mitochondrial carrier protein At2g47490 - Arabidopsis thaliana, EMBL:AC002535
A020765_01	0	-0.146	0.066		At2g22690	expressed protein
A020803_01	0	0.157	0.64		At4g37520	peroxidase 50 (PER50) (P50) (PRXR2) identical to SP|Q43731 Peroxidase 50 precursor (EC 1.11.1.7) (Atperox P50) (PRXR2) (ATP9a)] {Arabidopsis thaliana}
A020869_01	0	-0.177	0.311		At5g54080	homogentisate 1,2-dioxygenase / homogentisicase/homogentisate oxygenase / homogentisic acid oxidase (HGO) identical to SP|Q9ZRA2 Homogentisate 1,2-dioxygenase (EC 1.13.11.5) (Homogentisicase) (Homogentisate oxygenase) (Homogentisic acid oxidase) {Arabidop
A020984_01	0	0.082	0.516		At4g22540	oxysterol-binding family protein similar to SP|P16258 Oxysterol-binding protein 1 {Oryctolagus cuniculus}; contains Pfam profiles PF00169: PH domain, PF01237: Oxysterol-binding protein
A021295_01	0	-0.051	0.313		At4g25690	expressed protein
A021858_01	0	0.258	0.502		At1g64750	DSS1/SEM1 family protein contains Pfam profile PF05160: DSS1/SEM1 family
A022247_01	0	0.206	0.504		At3g12590	expressed protein
A022369_01	0	-0.124	0.276		At4g19700	expressed protein
A022555_01	0	0.087	0.662		At4g02860	phenazine biosynthesis PhzC/PhzF family protein contains Pfam profile: PF02567 phenazine biosynthesis-like protein
A023030_01	0	0.071	0.425		At5g23870	pectinacetylesterase family protein contains Pfam profile: PF03283 pectinacetylesterase
A023177_01	0	-0.079	0.228		At5g08750	zinc finger (C3HC4-type RING finger) family protein contains Pfam profile: PF00097 zinc finger, C3HC4 type (RING finger)
A023609_01	0	0.205	0.479		At2g01860	pentatricopeptide (PPR) repeat-containing protein contains Pfam profile PF01535: PPR repeat
A024114_01	0	-0.053	0.619		At4g19390	expressed protein
A024172_01	0	-0.033	0.3		At5g17440	LUC7 N_terminus domain-containing protein contains Pfam domain PF03194: Protein of unknown function, DUF259
A024181_01	0	-0.16	0.215		At2g18750	calmodulin-binding protein similar to calmodulin-binding protein TCB60 GI:1698548 from [Nicotiana tabacum]
A024201_01	0	0.155	0.426		At4g28200	expressed protein
A024548_01	0	-0.182	0.127		At2g46550	expressed protein
A024676_01	0	-0.132	0.403		At4g04620	autophagy 8b (APG8b) identical to autophagy 8b [Arabidopsis thaliana] GI:19912153; contains Pfam profile PF02991: Microtubule associated protein 1A/1B, light chain 3
A024781_01	0	-0.213	0.073		At1g72650	myb family transcription factor contains Pfam PF00249: Myb-like DNA-binding domain
A024799_01	0	-0.312	0.262		At3g44320	nitrilase 3 (NIT3) identical to SP|P46010 Nitrilase 3 (EC 3.5.5.1) {Arabidopsis thaliana}
A025167_01	0	-0.201	0.275		At3g14640	cytochrome P450, putative similar to GB:Q05047 from [Catharanthus roseus]
A025980_01	0	-0.487	0.573		At3g32980	peroxidase 32 (PER32) (P32) (PRXR3) identical to SP|Q9LHB9 Peroxidase 32 precursor (EC 1.11.1.7) (Atperox P32) (PRXR3) (ATP16a) {Arabidopsis thaliana}
A200033_01	0	-0.201	0.047		At1g73650	expressed protein
A200149_01	0	0.148	0.646		At5g25280	serine-rich protein-related contains some similarity to serine-rich proteins
A200160_01	0	-0.029	0.3		At5g42080	GTP-binding protein / phragmoplastin, putative strong similarity to GTP-binding protein [Arabidopsis thaliana] GI:807577, phragmoplastin SDL5A [Glycine max] GI:1218004; contains Pfam profiles PF01031: Dynamin central region, PF00350: Dynamin family
A200380_01	0	0.156	0.549		At1g13810	expressed protein ; expression supported by MPSS
A200385_01	0	-0.179	0.135		At1g14340	RNA recognition motif (RRM)-containing protein
A200400_01	0	-0.098	0.573		At1g15250	60S ribosomal protein L37 (RPL37A) almost identical to GB:Q43292
A200509_01	0	-0.123	0.323		At1g22985	AP2 domain-containing transcription factor, putative
A200908_01	0	0.119	0.365		At1g62040	autophagy 8c (APG8c) identical to autophagy 8c [Arabidopsis thaliana] GI:19912155; contains Pfam profile PF02991: Microtubule associated protein 1A/1B, light chain 3
A201082_01	0	0.011	0.333		At1g79190	expressed protein
A201140_01	0	-0.159	0.112		At2g06010	expressed protein
A201468_01	0	0.07	0.212		At2g36835	expressed protein
A202131_01	0	-0.041	0.204		At4g06599	ubiquitin family protein contains Pfam domian PF00240: Ubiquitin family
A203384_01	0	-0.094	0.303		At5g60540	SNO glutamine amidotransferase family protein similar to pyridoxine synthesis protein PDX2 [Cercospora nicotianae] GI:9954418; contains Pfam profile PF01174: SNO glutamine amidotransferase family
At30000007	0	0.022	0.645		At1g01070	nodulin MtN21 family protein similar to MtN21 GI:2598575 (root nodule development) from [Medicago truncatula]
At30000647	0	-0.057	0.143		At1g06640	2-oxoglutarate-dependent dioxygenase, putative similar to 2A6 (GI:599622) and tomato ethylene synthesis regulatory protein E8 (SP|P10967); contains Pfam profile: PF00671 Iron/Ascorbate oxidoreductase family
At30001243	0	-0.156	0.11		At1g11650	RNA-binding protein 45 (RBP45), putative similar to gb|U90212 DNA binding protein ACBF from Nicotiana tabacum and contains 3 PF|00076 RNA recognition motif domains. ESTs gb|T44278, gb|R65195, gb|N65904, gb|H37499, gb|R90487, gb|N95952, gb|T44278, gb|Z2016
At30001332	0	-0.11	0.144		At1g12390	cornichon family protein contains Pfam profile: PF03311 cornichon protein
At30001496	0	-0.148	0.412		At1g13960	WRKY family transcription factor similar to WKRY DNA-binding protein GB:AAD17441
At30001662	0	-0.191	0.18		At1g15350	expressed protein
At30002189	0	-0.235	0.556		At1g20280	homeobox-leucine zipper protein-related similar to SP|Q02283 Homeobox-leucine zipper protein HAT5 (HD-ZIP protein 5) (HD-ZIP protein ATHB-1) {Arabidopsis thaliana}
At30002693	0	0.172	0.446		At1g25054	UDP-3-O-acyl N-acetylglycosamine deacetylase family protein contains Pfam domain PF03331: UDP-3-O-acyl N-acetylglycosamine deacetylase
At30003430	0	-0.044	0.297		At1g32650	hypothetical protein
At30003482	0	-0.19	0.047		At1g33135	hypothetical protein
At30004215	0	0.027	0.761		At1g49470	expressed protein contains Pfam profile PF04819: Family of unknown function (DUF716) (Plant viral-response family)
At30005243	0	-0.191	0.194		At1g60730	aldo/keto reductase family protein contains Pfam profile PF00248: oxidoreductase, aldo/keto reductase family
At30005297	0	-0.21	0.442		At1g61200	homeobox-leucine zipper protein-related similar to SP|Q02283 Homeobox-leucine zipper protein HAT5 (HD-ZIP protein 5) (HD-ZIP protein ATHB-1) {Arabidopsis thaliana}
At30005754	0	-0.286	0.14		At1g65350	polyubiquitin, putative similar to polyubiquitin GI:248337 from [Zea mays]
At30006698	0	-0.269	0.165		At1g73950	zinc finger (C3HC4-type RING finger) family protein contains Pfam profile: PF00097 zinc finger, C3HC4 type
At30007499	0	0.072	0.562		At2g01100	expressed protein
At30007788	0	-0.108	0.321		At2g03890	phosphatidylinositol 3- and 4-kinase family protein low similarity to phosphatidylinositol 4-kinase type-II beta [Homo sapiens] GI:20159767; contains Pfam profile PF00454: Phosphatidylinositol 3- and 4-kinase
At30009056	0	-0.12	0.398		At2g21620	universal stress protein (USP) family protein / responsive to dessication protein (RD2) strong similarity to RD2 protein [Arabidopsis thaliana] GI:15320408; contains Pfam profile PF00582: universal stress protein family; identical to cDNA RD2 GI:15320407
At30010024	0	0.078	0.277		At2g30530	expressed protein
At30012051	0	-0.278	0.17		At2g47910	expressed protein
At30012380	0	-0.047	0.249		At3g03470	cytochrome P450, putative similar to cytochrome P450 89A2 GB:Q42602 [Arabidopsis thaliana]
At30012672	0	-0.253	0.276		At3g05937	expressed protein no suitable start codon was identified.
At30012894	0	0.138	0.61		At3g07760	expressed protein
At30013200	0	-0.062	0.283		At3g10770	expressed protein
At30013201	0	0.016	0.308		At3g10770	expressed protein
At30013693	0	-0.008	0.522		At3g14690	cytochrome P450, putative similar to GB:Q05047 from [Catharanthus roseus]
At30014767	0	0.109	0.313		At3g24120	myb family transcription factor contains Pfam profile: PF00249 myb-like DNA-binding domain
At30016161	0	-0.037	0.294		At3g48320	cytochrome P450 71A21, putative (CYP71A21) identical to Cytochrome P450 71A21 (SP:Q9STL2) [Arabidopsis thaliana]
At30016439	0	0.095	0.429		At3g51000	epoxide hydrolase, putative similar to epoxide hydrolase [Glycine max] GI:2764806; contains Pfam profile PF00561: hydrolase, alpha/beta fold family
At30016839	0	0	0.354		At3g54380	SAC3/GANP family protein contains Pfam profile: PF03399 SAC3/GANP family
At30017041	0	0.101	0.681		At3g56170	Ca(2+)-dependent nuclease identical to Ca(2+)-dependent nuclease [Arabidopsis thaliana] GI:7684292; supporting cDNA gi|7684291|dbj|D84226.1|
At30018371	0	-0.063	0.514		At4g04620	autophagy 8b (APG8b) identical to autophagy 8b [Arabidopsis thaliana] GI:19912153; contains Pfam profile PF02991: Microtubule associated protein 1A/1B, light chain 3
At30018722	0	-0.036	0.606		At4g09760	choline kinase, putative similar to GmCK2p choline kinase gi|1438881|gb|AAC49375
At30019140	0	-0.054	0.264		At4g13530	expressed protein predicted protein, Arabidopsis thaliana
At30019141	0	0.007	0.342		At4g13530	expressed protein predicted protein, Arabidopsis thaliana
At30019217	0	-0.064	0.127		At4g14160	transport protein, putative similar to Swiss-Prot:Q15436 protein transport protein Sec23A [Homo sapiens]
At30020528	0	-0.108	0.301		At4g25300	oxidoreductase, 2OG-Fe(II) oxygenase family protein similar to flavonol synthase [Petunia x hybrida][GI:311658], anthocyanidin synthase [Torenia fournieri][GI:12583673]; contains PF03171 2OG-Fe(II) oxygenase superfamily domain
At30020529	0	-0.138	0.415		At4g25300	oxidoreductase, 2OG-Fe(II) oxygenase family protein similar to flavonol synthase [Petunia x hybrida][GI:311658], anthocyanidin synthase [Torenia fournieri][GI:12583673]; contains PF03171 2OG-Fe(II) oxygenase superfamily domain
At30021884	0	0.039	0.412		At4g36760	aminopeptidase P similar to Xaa-Pro aminopeptidase 2 [Lycopersicon esculentum] GI:15384991; contains Pfam profile PF00557: metallopeptidase family M24
At30021885	0	0.109	0.408		At4g36760	aminopeptidase P similar to Xaa-Pro aminopeptidase 2 [Lycopersicon esculentum] GI:15384991; contains Pfam profile PF00557: metallopeptidase family M24
At30022904	0	-0.056	0.202		At5g06530	ABC transporter family protein
At30022967	0	-0.135	0.378		At5g07100	WRKY family transcription factor SPF1 protein - Ipomoea batatas (sweet potato), PIR:S51529
At30023328	0	0.189	0.572		At5g10710	expressed protein
At30023967	0	0.163	0.39		At5g16880	VHS domain-containing protein / GAT domain-containing protein weak similarity to hepatocyte growth factor-regulated tyrosine kinase substrate [Homo sapiens] GI:2731383; contains Pfam profiles PF00790: VHS domain, PF03127: GAT domain
At30024173	0	-0.126	0.196		At5g18640	lipase class 3 family protein low similarity to Triacylglycerol Acylhydrolase (E.C.3.1.1.3) [Rhizomucor miehei] GI:230348; contains Pfam profile PF01764: Lipase
At30024256	0	-0.027	0.424		At5g19330	armadillo/beta-catenin repeat family protein / BTB/POZ domain-containing protein contains armadillo/beta-catenin-like repeats, Pfam:PF00514 and a BTB/POZ domain, Pfam:PF00651
At30024398	0	0	0.404		At5g20620	polyubiquitin (UBQ4) identical to GI:17677
At30027823	0	0.118	0.63		At5g57650	eukaryotic translation initiation factor-related contains weak similarity to Swiss-Prot:Q38884 eukaryotic translation initiation factor 3 subunit 2 (eIF-3 beta) (eIF3 p36) (eIF3i) (TGF-beta receptor interacting protein 1) (TRIP-1) [Arabidopsis thaliana]
At30027914	0	-0.269	0.146		At5g58370	expressed protein
At30028708	0	-0.375	0.35		At5g65210	bZIP family transcription factor (TGA1) identical to transcription factor (TGA1) GI:16550 from [Arabidopsis thaliana]
At30028733	0	-0.062	0.275		At5g65430	14-3-3 protein GF14 kappa (GRF8) identical to 14-3-3 protein GF14 kappa GI:5802794, SP:P48348 from [Arabidopsis thaliana]
A000735_01	0	-0.019	0.388		At1g21690	replication factor C 37 kDa, putative Similar to SWISS-PROT:P35249 activator 1 37 kDa subunit (Replication factor C 37 kDa subunit, A1 37 kDa subunit, RF-C 37 kDa subunit, RFC37) [Homo sapiens]; contains Pfam domain, PF00004: ATPase, AAA family
A001224_01	0	-0.118	0.511		At1g78270	UDP-glucose glucosyltransferase, putative similar to UDP-glucose glucosyltransferase GI:3928543 from [Arabidopsis thaliana]
A001247_01	0	-0.134	0.134		At1g50420	scarecrow-like transcription factor 3 (SCL3) identical to GB:AAD24404 GI:4580515 from [Arabidopsis thaliana] (Plant J. 18 (1), 111-119 (1999))
A011684_01	0	-0.007	0.416		At3g53630	expressed protein predicted proteins, Arabidopsis thaliana
A014179_01	0	-0.007	0.338		At4g24680	expressed protein
A016980_01	0	0.042	0.388		At5g55700	glycosyl hydrolase family 14 protein similar to beta-amylase enzyme GI:6065749 from [Arabidopsis thaliana]; contains Pfam profile PF01373: Glycosyl hydrolase family 14
A020350_01	0	-0.302	0.839		At3g15500	no apical meristem (NAM) family protein (NAC3) identical to AtNAC3 [Arabidopsis thaliana] GI:12060424; contains Pfam PF02365: No apical meristem (NAM) domain; similar to jasmonic acid 2 GB:AAF04915 from [Lycopersicon esculentum]
At30016888	0	-0.002	0.396		At3g54830	amino acid transporter family protein belongs to INTERPRO:IPR002422 amino acid/polyamine transporter, family II

## Sheet: SOM1 Down
Oligo ID	Mock	TEV	TEV-At		Gene	Annotation
A000027_01	0	0.727	0.333		At1g75860	expressed protein
A000091_01	0	0.477	0.125		At1g73200	expressed protein
A000163_01	0	0.397	-0.382		At1g68400	leucine-rich repeat transmembrane protein kinase, putative similar to receptor kinase GB:AAA33715 from [Petunia integrifolia]
A000217_01	0	0.555	-0.245		At1g76360	protein kinase, putative similar to protein kinase APK1B, SWISS-PROT:P46573; contains protein kinase domain, Pfam:PF00069
A000231_01	0	0.29	-0.183		At1g48700	oxidoreductase, 2OG-Fe(II) oxygenase-related contains weak hit to Pfam PF03171: oxidoreductase, 2OG-Fe(II) oxygenase family
A000296_01	0	0.354	-0.326		At1g69900	expressed protein contains Pfam profile: PF04601 protein of unknown function (DUF569
A000362_01	0	0.396	-0.045		At1g03370	C2 domain-containing protein / GRAM domain-containing protein contains Pfam profiles PF00168: C2 domain; contains PF02893: GRAM domain; similar to Chain A, Crystal Structure Of Synaptotagmin Iii C2aC2B Length(GI:6980525); similar to Synaptotagmin III (Syt
A000469_01	0	0.478	-0.099		At1g63260	senescence-associated family protein similar to senescence-associated protein 5 [Hemerocallis hybrid cultivar] gi|3551954|gb|AAC34855
A000555_01	0	0.225	-0.365		At1g72180	leucine-rich repeat transmembrane protein kinase, putative similar to GI:3641252 from [Malus x domestica] (Plant Mol. Biol. 40 (6), 945-957 (1999))
A001006_01	0	0.463	-0.025		At1g75310	DNAJ heat shock N-terminal domain-containing protein low similarity to SP|Q27974 Auxilin {Bos taurus}; contains Pfam profile PF00226: DnaJ domain
A001033_01	0	0.681	-0.112		At1g51660	mitogen-activated protein kinase kinase (MAPKK), putative (MKK4) identical to MAP kinase kinase 4 [Arabidopsis thaliana] gi|3219271|dbj|BAA28830 gi_13265419
A001163_01	0	0.598	0.164		At1g54410	dehydrin family protein contains Pfam domain, PF00257: Dehydrin
A001239_01	0	0.377	-0.058		At1g28350	tRNA synthetase class I (W and Y) family protein contains Pfam profile: PF00579 tRNA synthetases class I (W and Y)
A001316_01	0	0.236	-0.266		At1g76550	pyrophosphate--fructose-6-phosphate 1-phosphotransferase alpha subunit, putative / pyrophosphate-dependent 6-phosphofructose-1-kinase, putative strong similarity to SP|Q41140 Pyrophosphate--fructose 6-phosphate 1-phosphotransferase alpha subunit (EC 2.7.1
A001392_01	0	0.176	-0.178		At1g19660	wound-responsive family protein similar to wound inducive gene (GI:8096273)[Nicotiana tabacum]
A001593_01	0	0.801	0.152		At1g61100	disease resistance protein (TIR class), putative domain signature TIR exists, suggestive of a disease resistance protein.
A001715_01	0	0.946	-0.011		At1g72240	expressed protein
A001957_01	0	0.84	-0.076		At1g27770	calcium-transporting ATPase 1, plasma membrane-type / Ca(2+)-ATPase isoform 1 (ACA1) / plastid envelope ATPase 1 (PEA1) identical to SP|Q37145 Calcium-transporting ATPase 1, plasma membrane-type (EC 3.6.3.8) (Ca(2+)-ATPase isoform 1) (Plastid envelope ATP
A001958_01	0	0.384	-0.041		At1g20780	armadillo/beta-catenin repeat protein-related / U-box domain-containing protein low similarity to immediate-early fungal elicitor protein CMPG1 [Petroselinum crispum] GI:14582200; contains Pfam profile PF04564: U-box domain
A002033_01	0	0.157	-0.041		At1g10940	serine/threonine protein kinase, putative similar to serine/threonine-protein kinase ASK1 [Arabidopsis thaliana] SWISS-PROT:P43291
A002085_01	0	0.743	0.169		At1g31130	expressed protein
A002116_01	0	0.384	-0.014		At1g75840	Rac-like GTP-binding protein (ARAC5) / Rho-like GTP-binding protein (ROP4) identical to RAC-like GTP-binding protein (ARAC5) SP:Q38937 [Arabidopsis thaliana], Rho-like GTP binding protein [Arabidopsis thaliana] GI:2654009; identical to cDNA Rho-like GTP b
A002360_01	0	0.321	-0.369		At1g22250	expressed protein
A002514_01	0	0.547	0.171		At1g19300	glycosyl transferase family 8 protein contains Pfam profile: PF01501 Glycosyl transferase family 8
A002560_01	0	0.124	-0.127		At1g67190	F-box family protein
A002600_01	0	0.379	-0.295		At1g41750	hypothetical protein
A002648_01	0	0.387	0.236		At1g11890	vesicle transport protein SEC22, putative identified as SEC22 by Raikhel, NV, et al. in Plant Physiol. 124: 1558-69 (2000); similar to vesicle trafficking protein gb|U91538 from Mus musculus; ESTs gb|F15494 and gb|F14097 come from this gene
A002704_01	0	0.805	0.431		At1g23490	ADP-ribosylation factor identical to SP:Q9SRC3 ADP-ribosylation factor 1-like [Arabidopsis thaliana], ADP-ribosylation factor GI:166586 [Arabidopsis thaliana]
A002725_01	0	0.317	-0.26		At1g56345	pseudouridine synthase family protein low similarity to SP|P23851 Ribosomal large subunit pseudouridine synthase C (EC 4.2.1.70) (Pseudouridylate synthase) (Uracil hydrolyase) {Escherichia coli}; contains Pfam profile PF00849: RNA pseudouridylate synthase
A002729_01	0	0.173	-0.246		At1g23480	glycosyl transferase family 2 protein similar to cellulose synthase from Agrobacterium tumeficiens [gi:710492] and Agrobacterium radiobacter [gi:710493]; contains Pfam glycosyl transferase, group 2 family protein domain PF00535 isoform contains GG accepto
A002773_01	0	0.47	0.121		At1g57610	expressed protein contains Pfam domain, PF04678: Protein of unknown function, DUF607
A002782_01	0	0.358	-0.213		At1g67950	RNA recognition motif (RRM)-containing protein
A002946_01	0	0.791	0.45		At1g52720	expressed protein
A003217_01	0	0.353	-0.046		At1g53210	sodium/calcium exchanger family protein / calcium-binding EF hand family protein contains Pfam profiles: PF01699 sodium/calcium exchanger protein, PF00036 EF hand
A003408_01	0	0.227	0.069		At1g24180	pyruvate dehydrogenase E1 component alpha subunit, mitochondrial, putative similar to SP|P52901 Pyruvate dehydrogenase E1 component alpha subunit, mitochondrial precursor (EC 1.2.4.1) (PDHE1-A) {Arabidopsis thaliana}; contains Pfam profile PF00676: Dehydr
A003479_01	0	0.241	0.001		At1g34420	leucine-rich repeat family protein / protein kinase family protein contains leucine rich repeat (LRR) domains, Pfam:PF00560; contains protein kinase domain, Pfam:PF00069
A003500_01	0	0.345	0.018		At1g68760	MutT/nudix family protein similar to SP|Q58549 ADP-ribose pyrophosphatase (EC 3.6.1.13) {Methanococcus jannaschii}; contains Pfam profile PF00293: NUDIX domain
A003559_01	0	0.491	0.239		At1g33930	avirulence-responsive family protein / avirulence induced gene (AIG1) family protein similar to SP|P54120 AIG1 protein {Arabidopsis thaliana}; contains Pfam profile PF04548: AIG1 family
A003683_01	0	0.435	-0.37		At1g01110	expressed protein contains Prosite PS00165: Serine/threonine dehydratases pyridoxal-phosphate attachment site
A003716_01	0	0.519	-0.679		At1g28400	expressed protein similar to E6 (GI:1000090) [Gossypium barbadense]
A003745_01	0	0.282	-0.014		At3g29770	hydrolase, alpha/beta fold family protein similar to SP|Q40708 PIR7A protein {Oryza sativa}, polyneuridine aldehyde esterase [Rauvolfia serpentina] GI:6651393; contains Pfam profile: PF00561 alpha/beta hydrolase fold
A003863_01	0	0.582	0.086		At1g53230	TCP family transcription factor 3 (TCP3) identical to transcription factor 3 (TCP3) [Arabidopsis thaliana] (GI:3243274); similar to flower development protein cycloidea (cyc3) GI:6358611 from [Misopates orontium]
A003931_01	0	0.123	-0.234		At1g11800	endonuclease/exonuclease/phosphatase family protein contains Pfam profile PF03372: Endonuclease/Exonuclease/phosphatase family
A004233_01	0	0.505	-0.595		At1g11050	protein kinase family protein contains protein kinase domain, Pfam:PF00069
A004279_01	0	0.298	-0.23		At1g03740	protein kinase family protein contains protein kinase domain, Pfam:PF00069
A004344_01	0	0.755	-0.177		At1g06000	UDP-glucoronosyl/UDP-glucosyl transferase family protein contains similarity to UDPG glucosyltransferase GB:AAB62270 GI:2232354 from [Solanum berthaultii]
A004464_01	0	0.771	0.207		At1g17290	alanine aminotransferase, putative similar to alanine aminotransferase from Panicum miliaceum [SP|P34106], GB:AAC62456 GI:3694807 from [Zea mays], GI:4730884 from Oryza sativa
A004632_01	0	0.58	-0.227		At1g07520	scarecrow transcription factor family protein similar to GB:AAD24412 from [Arabidopsis thaliana] (Plant J. 18 (1), 111-119 (1999)); contains Pfam profile: PF03514 GRAS family transcription factor
A004656_01	0	0.246	-0.216		At1g53840	pectinesterase family protein contains Pfam profile: PF01095 pectinesterase
A004728_01	0	0.454	-0.21		At1g44100	amino acid permease 5, putative (AAP5) nearly identical to amino acid permease (AAP5) GI:608673 from [Arabidopsis thaliana]
A004777_01	0	0.647	-0.399		At1g51700	Dof-type zinc finger domain-containing protein (ADOF1) identical to cDNA adof1 mRNA for dof zinc finger protein, GI:3608260; contains Pfam profile PF02701: Dof domain, zinc finger
A004860_01	0	0.77	0.32		At1g01140	CBL-interacting protein kinase 9 (CIPK9) identical to CBL-interacting protein kinase 9 [Arabidopsis thaliana] gi|13249117|gb|AAK16684; contains Pfam profiles PF00069: Protein kinase domain and PF03822: NAF domain; identical to cDNA CBL-interacting protein
A004927_01	0	0.786	0.376		At3g49390	RNA-binding protein, putative RNA-binding protein RBP37, Arabidopsis thaliana, PIR:T04196
A004968_01	0	0.302	-0.07		At4g15800	rapid alkalinization factor (RALF) family protein similar to RALF precursor [Nicotiana tabacum] GI:16566316
A005174_01	0	0.314	-0.03		At1g09630	Ras-related GTP-binding protein, putative similar to GTP-binding protein GI:1370146 from [Lotus japonicus]
A005197_01	0	0.909	0.065		At1g27350	expressed protein contains 1 transmembrane domain; similar to ribosome associated membrane protein RAMP4 GI:4585827 [Rattus norvegicus]; similar to ESTs gb|T20610 and gb|AA586199
A005224_01	0	0.643	-0.195		At5g26030	ferrochelatase I identical to Swiss-Prot:P42043 ferrochelatase I, chloroplast/mitochondrial precursor (EC 4.99.1.1) (Protoheme ferro-lyase) (Heme synthetase) [Arabidopsis thaliana]
A005229_01	0	0.212	-0.134		At2g17950	homeodomain transcription factor (WUSCHEL) 99.4% identical to WUSCHELL (GI:4090200) [Arabidopsis thaliana]
A005246_01	0	0.715	-0.185		At1g02660	lipase class 3 family protein contains Pfam profile PF01764: Lipase
A005749_01	0	0.422	-0.18		At2g47730	glutathione S-transferase 6 (GST6) identical to GB:X95295. Based on identical cDNA hits, the translation is now 40 AAs longer at the N-terminal, and start of exon2 is also corrected.
A005892_01	0	0.172	-0.075		At3g57650	acyl-CoA:1-acylglycerol-3-phosphate acyltransferase, putative similar to acyl-CoA:1-acylglycerol-3-phosphate acyltransferase GI:4583544 from [Brassica napus]
A006284_01	0	0.173	-0.07		At2g45290	transketolase, putative strong similarity to transketolase 1 [Capsicum annuum] GI:3559814; contains Pfam profiles PF02779: Transketolase, pyridine binding domain, PF02780: Transketolase, C-terminal domain, PF00456: Transketolase, thiamine diphosphate bind
A006343_01	0	1.034	-0.353		At2g38470	WRKY family transcription factor contains Pfam profile: PF03106 WRKY DNA -binding domain;
A006384_01	0	0.171	-0.191		At2g47410	transducin family protein / WD-40 repeat family protein contains 5 WD-40 repeats (PF00400); similar to WDR protein, form B (GI:14970593) [Mus musculus]
A006387_01	0	0.598	0.068		At2g38640	expressed protein contains Pfam profile PF04525: Protein of unknown function (DUF567)
A006496_01	0	0.718	0.325		At2g41180	sigA-binding protein-related low similarity to SigA binding protein [Arabidopsis thaliana] GI:6980074; contains Pfam domain PF05678: VQ motif
A006851_01	0	1.011	-0.34		At2g26530	expressed protein
A006880_01	0	0.112	-0.072		At2g20140	26S protease regulatory complex subunit 4, putative similar to Swiss-Prot:P48601 26S protease regulatory subunit 4 (P26S4) [Drosophila melanogaster]
A007030_01	0	0.618	-0.236		At2g46140	late embryogenesis abundant protein, putative / LEA protein, putative similar to SP|P46518 Late embryogenesis abundant protein Lea14-A {Gossypium hirsutum}; contains Pfam profile PF03168: Late embryogenesis abundant protein
A007064_01	0	0.393	-0.399		At2g38870	protease inhibitor, putative similar to SP|P24076 Glu S.griseus protease inhibitor (BGIA) {Momordica charantia}; contains Pfam profile PF00280: Potato inhibitor I family
A007242_01	0	0.141	-0.15		At2g30120	expressed protein
A007296_01	0	0.575	0.072		At2g05940	protein kinase, putative similar to auxin-regulated dual specificity cytosolic kinase [Lycopersicon esculentum] gi|14484938|gb|AAK62821
A007409_01	0	0.588	0.13		At2g38580	expressed protein ; expression supported by MPSS
A007658_01	0	0.911	-0.004		At2g32380	expressed protein
A007697_01	0	0.12	-0.015		At2g19160	expressed protein contains Pfam profile PF03267: Arabidopsis protein of unknown function, DUF266
A007739_01	0	0.234	-0.342		At2g17120	peptidoglycan-binding LysM domain-containing protein contains Pfam profile PF01476: LysM domain; supporting cDNA gi|16226688|gb|AF428464.1|AF428464
A007876_01	0	0.343	-0.049		At2g40270	protein kinase family protein contains Pfam domain, PF00069: Protein kinase domain
A007964_01	0	0.778	-0.287		At2g06850	xyloglucan:xyloglucosyl transferase / xyloglucan endotransglycosylase / endo-xyloglucan transferase (EXT) (EXGT-A1) identical to endo-xyloglucan transferase (ext) GI:469484 and endoxyloglucan transferase (EXGT-A1) GI:5533309 from [Arabidopsis thaliana]
A007975_01	0	0.293	-0.139		At2g22420	peroxidase 17 (PER17) (P17) identical to SP|Q9SJZ2 Peroxidase 17 precursor (EC 1.11.1.7) (Atperox P17) (ATP25a) {Arabidopsis thaliana}
A007982_01	0	0.47	0.158		At2g21520	SEC14 cytosolic factor, putative / phosphoglyceride transfer protein, putative contains Pfam PF00650 : CRAL/TRIO domain; contains Pfam PF03765 : CRAL/TRIO, N-terminus; similar to phosphatidylinositol transfer-like protein IV (GI:14486707) [Lotus japonicus
A007984_01	0	0.27	-0.181		At2g20720	pentatricopeptide (PPR) repeat-containing protein contains Pfam TIGR00756: pentatricopeptide repeat domain
A008022_01	0	0.808	-0.156		At2g26190	calmodulin-binding family protein contains Pfam profile PF00612: IQ calmodulin-binding motif
A008191_01	0	0.346	-0.103		At2g22860	phytosulfokines 2 (PSK2) identical to phytosulfokines 2 (PSK2) from [Arabidopsis thaliana]
A008364_01	0	0.377	-0.474		At2g47240	long-chain-fatty-acid--CoA ligase family protein / long-chain acyl-CoA synthetase family protein similar to GI:1617270 (MF7P) and gi:1617628 (MF45P) from [Brassica napus] ; contains Pfam AMP-binding enzyme domain PF00501
A008545_01	0	0.406	-0.027		At2g02860	sucrose transporter / sucrose-proton symporter (SUC3) identical to sucrose transporter [Arabidopsis thaliana] GI:8052190; similar to sucrose transporters from [Oryza sativa (japonica cultivar-group)] GI:2723471, [Zea mays] GI:5771354, [Triticum aestivum]
A008560_01	0	0.976	-0.105		At2g01180	phosphatidic acid phosphatase family protein / PAP2 family protein similar to phosphatidic acid phosphatase 2a2 [Cavia porcellus] GI:3641336; contains Pfam profile PF01569 PAP2 superfamily
A008800_01	0	0.233	-0.165		At2g43130	Ras-related protein (ARA-4) / small GTP-binding protein, putative identical to SP:P28187 Ras-related protein ARA-4 {Arabidopsis thaliana}
A008872_01	0	0.153	0.032		At3g28920	zinc finger homeobox family protein / ZF-HD homeobox family protein contains Pfam PF04770: ZF-HD protein dimerisation region; contains Pfam TIGR01566: ZF-HD homeobox protein Cys/His-rich domain; contains TIGRFAM TIGR01565: homeobox domain, ZF-HD class; si
A008882_01	0	0.123	-0.089		At3g53490	expressed protein ADAM 13, Xenopus laevis, EMBL:XLU66003
A008933_01	0	0.707	-0.038		At3g49530	no apical meristem (NAM) family protein contains Pfam PF02365: No apical meristem (NAM) domain; similar to NAC2 - Arabidopsis thaliana, EMBL:AF201456
A008983_01	0	0.682	0.307		At3g07090	expressed protein
A009023_01	0	0.821	0.289		At3g11820	syntaxin 121 (SYP121) / syntaxin-related protein (SYR1) contains Pfam profiles: PF00804 syntaxin and PF05739: SNARE domain; identical to cDNA syntaxin-related protein At-SYR1 (At-Syr1) GI:4206788, SP|Q9ZSD4 Syntaxin 121 (AtSYP121) (Syntaxin-related protei
A009033_01	0	0.207	0.059		At3g22950	ADP-ribosylation factor, putative similar to ADP-ribosylation factor GB:P91924 [Dugesia japonica]
A009054_01	0	0.131	-0.132		At3g17430	phosphate translocator-related low similarity to phosphoenolpyruvate/phosphate translocator precursor [Mesembryanthemum crystallinum] GI:9295275, SP|P52178 Triose phosphate/phosphate translocator, non-green plastid, chloroplast precursor (CTPT) {Brassica
A009066_01	0	1.04	-0.15		At3g48090	disease resistance protein (EDS1) identical to disease resistance protein/lipase homolog EDS1 GI:4454567; contains Pfam profile PF01764: Lipase
A009105_01	0	0.837	0.358		At3g09830	protein kinase, putative similar to protein kinase [Lophopyrum elongatum] gi|13022177|gb|AAK11674
A009118_01	0	0.594	-0.083		At3g16700	fumarylacetoacetate hydrolase family protein contains Pfam domain, PF01557: fumarylacetoacetate hydrolase family protein
A009178_01	0	0.943	0.133		At3g48640	expressed protein
A009232_01	0	0.259	-0.103		At3g62370	expressed protein
A009328_01	0	0.442	-0.003		At3g56880	VQ motif-containing protein contains PF05678: VQ motif
A009333_01	0	0.343	-0.33		At3g18690	VQ motif-containing protein contains PF05678: VQ motif
A009443_01	0	0.327	0.186		At3g58600	expressed protein hypothetical protein F21M11.17 - Arabidopsis thaliana, EMBL:AC003027
A009476_01	0	0.322	-0.268		At3g57730	protein kinase, putative contains protein kinase domain, Pfam:PF00069
A009495_01	0	0.245	0.066		At3g21640	FKBP-type peptidyl-prolyl cis-trans isomerase family protein similar to rof1 [Arabidopsis thaliana] GI:1354207; contains Pfam profile: PF00254 FKBP-type peptidyl-prolyl cis-trans isomerases
A009578_01	0	0.379	0.044		At3g02170	expressed protein
A009600_01	0	0.722	-0.244		At3g47380	invertase/pectin methylesterase inhibitor family protein low similarity to SP|Q42534 Pectinesterase 2 precursor (EC 3.1.1.11) (Pectin methylesterase 2) (PE 2) {Arabidopsis thaliana}; contains Pfam profile PF04043: Plant invertase/pectin methylesterase inh
A009658_01	0	0.309	-0.026		At3g22620	protease inhibitor/seed storage/lipid transfer protein (LTP) family protein similar to pEARLI 1 (Accession No. L43080): an Arabidopsis member of a conserved gene family (PGF95-099), Plant Physiol. 109 (4), 1497 (1995); contains Pfam protease inhibitor/see
A009681_01	0	1.114	-1.059		At3g21150	zinc finger (B-box type) family protein contains Pfam profile:PF01760 CONSTANS family zinc finger
A009682_01	0	0.341	0.093		At3g07680	emp24/gp25L/p24 family protein similar to SP|Q15363 Cop-coated vesicle membrane protein p24 precursor (p24A) {Homo sapiens}; contains Pfam profile PF01105: emp24/gp25L/p24 family
A009691_01	0	0.245	-0.005		At3g21070	ATP-NAD kinase family protein contains Pfam domain, PF01513: ATP-NAD kinase
A009751_01	0	0.325	-0.142		At3g07470	expressed protein contains Pfam profile PF04398: Protein of unknown function, DUF538
A009769_01	0	0.612	-0.002		At3g02230	reversibly glycosylated polypeptide-1 (RGP1) identical to reversibly glycosylated polypeptide-1 (AtRGP) [Arabidopsis thaliana] GI:2317729
A009980_01	0	0.27	-0.253		At3g07060	expressed protein ; expression supported by MPSS
A010011_01	0	0.2	-0.123		At3g06760	drought-responsive family protein similar to drought-induced mRNA, Di19 [Arabidopsis thaliana] gi|469110|emb|CAA55321
A010031_01	0	0.342	-0.124		At3g09490	chloroplast lumen common family protein 2 TPR domains; similar to chloroplast lumen proteins [GI:4056493 (F3G5.19)(At2g37400)] and [GI:7413648 (T22P11.180),(At5g02590)] [Arabidopsis thaliana]; +
A010066_01	0	0.295	-0.32		At3g23820	NAD-dependent epimerase/dehydratase family protein similar to nucleotide sugar epimerase from Vibrio vulnificus GI:3093975 [PID:g3093975], WbnF [Escherichia coli] GI:5739472, CAPI protein {Staphylococcus aureus} SP|P39858; contains Pfam profile: PF01370 N
A010122_01	0	0.367	0.12		At3g25230	peptidyl-prolyl cis-trans isomerase / FK506-binding protein (ROF1) identical to rotamase FKBP (ROF1) GB:U49453 [Arabidopsis thaliana] (Mol. Gen. Genet. 252 (5), 510-517 (1996))
A010132_01	0	0.197	-0.042		At3g49720	expressed protein
A010208_01	0	0.755	0.177		At3g54420	class IV chitinase (CHIV) almost identical to class IV chitinase from GI:2597826 [Arabidopsis thaliana]
A010234_01	0	0.193	0.045		At3g48190	ataxia-telangiectasia mutated protein (Atm) identical to ataxia-telangiectasia mutated protein (Atm) [Arabidopsis thaliana] GI:7529272; contains Pfam profile PF00855: PWWP domain; contains GA donor splice site at exon 73
A010345_01	0	0.205	-0.095		At3g43240	ARID/BRIGHT DNA-binding domain-containing protein contains Pfam profile PF01388: ARID/BRIGHT DNA binding domain
A010420_01	0	0.116	-0.063		At3g07568	expressed protein
A010656_01	0	0.289	0.085		At3g18410	NADH-ubiquinone oxidoreductase-related similar to NADH-ubiquinone oxidoreductase 12 kDa subunit, mitochondrial precursor (EC 1.6.5.3) (EC 1.6.99.3) (Complex I-12KD) (CI-12KD). (Swiss-Prot:Q03015) [Neurospora crassa]
A010678_01	0	0.224	-0.034		At3g21220	mitogen-activated protein kinase kinase (MAPKK), putative (MKK5) identical to GB:BAA28831 from [Arabidopsis thaliana]; mitogen-activated protein kinase kinase (MAPKK) family, PMID:12119167
A010741_01	0	0.227	0.006		At3g10820	transcription elongation factor-related low similarity to transcription elongation factor TFIIS.h [Mus musculus] GI:3288547
A010871_01	0	0.336	-0.082		At3g27200	plastocyanin-like domain-containing protein contains similarity to uclacyanin I GI:3399767 GB:AAC32038 from [Arabidopsis thaliana]
A011085_01	0	0.526	0.084		At3g14840	leucine-rich repeat family protein / protein kinase family protein contains Pfam domains PF00560: Leucine Rich Repeat and PF00069: Protein kinase domain; contains 2 predicted transmembrane domains
A011223_01	0	0.178	-0.079		At3g27930	expressed protein
A011227_01	0	0.978	-0.227		At3g60420	expressed protein
A011374_01	0	0.219	-0.127		At3g12360	ankyrin repeat family protein contains ankyrin repeat domains, Pfam:PF00023
A011409_01	0	0.828	0.059		At3g07580	expressed protein
A011629_01	0	0.056	-0.095		At3g45240	protein kinase family protein contains eukaryotic protein kinase domain, INTERPRO:IPR000719
A011678_01	0	0.748	0.225		At3g54960	thioredoxin family protein similar to protein disulfide isomerase GI:5902592 from [Volvox carteri f. nagariensis], GI:2708314 from Chlamydomonas reinhardtii; contains Pfam profile: PF00085 Thioredoxin
A011689_01	0	1.018	-0.482		At3g50060	myb family transcription factor contains Pfam profile: PF00249 myb-like DNA-binding domain; identical to cDNA MYB-related protein (1107 bp) GI:1263096
A011728_01	0	0.696	0.141		At3g14200	DNAJ heat shock N-terminal domain-containing protein low similarity to SP|O75190|DJB6_HUMAN DnaJ homolog subfamily B member 6 (Heat shock protein J2) {Homo sapiens}; contains Pfam profile PF00226 DnaJ domain
A011732_01	0	0.419	-0.027		At3g62420	bZIP transcription factor family protein similar to common plant regulatory factor 6 GI:9650826 from [Petroselinum crispum]
A011781_01	0	0.717	0.273		At3g51920	calmodulin-9 (CAM9) identical to calmodulin 9 GI:5825602 from [Arabidopsis thaliana]; contains Pfam profile PF00036: EF hand
A011854_01	0	0.764	0.021		At3g45640	mitogen-activated protein kinase, putative / MAPK, putative (MPK3) identical to mitogen-activated protein kinase homolog (AtMPK3)[Arabidopsis thaliana] SWISS-PROT:Q39023; PMID:12119167
A012031_01	0	0.283	-0.045		At3g02880	leucine-rich repeat transmembrane protein kinase, putative contains Pfam profiles: PF00069 Eukaryotic protein kinase domain, PF00560 Leucine Rich Repeat (5 copies)
A012185_01	0	0.664	0.141		At3g51160	GDP-D-mannose-4,6-dehydratase (MUR1) almost identical to GDP-D-mannose-4,6-dehydratase (MUR1) GI:1764100 from [Arabidopsis thaliana]
A012314_01	0	0.423	-0.113		At3g08670	expressed protein
A012326_01	0	0.488	0.16		At3g08710	thioredoxin family protein similar to thioredoxin H-type GB:P29448 SP|P29448 [Arabidopsis thaliana], Thioredoxin H-type 2 (TRX-H2) SP|Q07090 {Nicotiana tabacum}; contains Pfam profile: PF00085 Thioredoxin
A012468_01	0	0.447	-0.115		At3g53810	lectin protein kinase, putative similar to receptor lectin kinase 3 [Arabidopsis thaliana] gi|4100060|gb|AAD00733; contains protein kinase domain, Pfam:PF00069; contains legume lectins alpha and beta domains, Pfam:PF00138 and Pfam:PF00139
A012586_01	0	0.711	-0.063		At3g59880	expressed protein hypothetical protein F6E13.14 - Arabidopsis thaliana, PIR:T00681; expression supported by MPSS
A012647_01	0	0.192	-0.211		At3g16400	jacalin lectin family protein similar to myrosinase-binding protein homolog [Arabidopsis thaliana] GI:2997767, epithiospecifier [Arabidopsis thaliana] GI:16118845; contains Pfam profiles PF01419 jacalin-like lectin family, PF01344 Kelch motif
A012672_01	0	0.532	-0.086		At3g52800	zinc finger (AN1-like) family protein contains Pfam domain, PF01428: AN1-like Zinc finger
A012734_01	0	0.899	-0.154		At3g59080	aspartyl protease family protein contains similarity to CND41, chloroplast nucleoid DNA binding protein (GI:2541876) [Nicotiana tabacum]; contains Pfam profile PF00026: Eukaryotic aspartyl protease
A012810_01	0	0.5	-0.274		At3g56240	copper homeostasis factor / copper chaperone (CCH) (ATX1) identical to gi:3168840 Pfam profile PF00403: Heavy-metal-associated domain
A012854_01	0	0.302	-0.226		At4g26400	zinc finger (C3HC4-type RING finger) family protein contains Pfam domain, PF00097: Zinc finger, C3HC4 type (RING finger)
A012885_01	0	0.21	0.049		At4g02980	auxin-binding protein 1 (ABP1) identical to Auxin-binding protein 1 precursor (ABP) (Swiss-Prot:P33487) [Arabidopsis thaliana]
A012989_01	0	0.215	-0.008		At4g25030	expressed protein
A013019_01	0	0.539	0.104		At4g13350	human Rev interacting-like protein-related / hRIP protein-related similar to SP|P52594 Nucleoporin-like protein RIP (HIV-1 Rev-binding protein) (Rev interacting protein) (Rev/Rex activation domain-binding protein) {Homo sapiens}; contains Pfam profile PF0
A013235_01	0	0.653	0.186		At4g35310	calcium-dependent protein kinase, putative / CDPK, putative similar to calmodulin-domain protein kinase CDPK isoform 6 [Arabidopsis thaliana] gi|1399275|gb|AAB03246; contains protein kinase domain, Pfam:PF00069; contains EF hand domain (calcium-binding EF
A013375_01	0	0.471	-0.049		At4g33060	peptidyl-prolyl cis-trans isomerase cyclophilin-type family protein contains Pfam domain, PF00160: peptidyl-prolyl cis-trans isomerase, cyclophilin-type
A013447_01	0	0.555	0.238		At4g02410	lectin protein kinase family protein contains Pfam domains, PF00069: Protein kinase domain, PF00139: Legume lectins beta domain and PF00138: Legume lectins alpha domain
A013669_01	0	0.71	0.15		At4g24190	shepherd protein (SHD) / clavata formation protein, putative nearly identical to SHEPHERD [Arabidopsis thaliana] GI:19570872; contains Pfam profiles PF02518: ATPase, histidine kinase-, DNA gyrase B-, and HSP90-like domain protein, PF00183: Hsp90 protein
A013749_01	0	0.734	-0.132		At4g30660	hydrophobic protein, putative / low temperature and salt responsive protein, putative similar to SP|Q9ZNQ7 Hydrophobic protein RCI2A (Low temperature and salt responsive protein LTI6A) {Arabidopsis thaliana}; contains Pfam profile PF01679: Uncharacterized
A013788_01	0	0.342	0.085		At4g39830	L-ascorbate oxidase, putative similar to SP|P14133 L-ascorbate oxidase precursor (EC 1.10.3.3) (Ascorbase) {Cucumis sativus}; contains Pfam profile PF00394: Multicopper oxidase
A013807_01	0	0.102	-0.119		At4g09720	Ras-related GTP-binding protein, putative similar to GTP-binding protein RAB7A from [Lotus japonicus]
A014027_01	0	0.766	0.159		At4g08470	mitogen-activated protein kinase, putative similar to mitogen-activated protein kinase [Arabidopsis thaliana] gi|1255448|dbj|BAA09057; contains Pfam PF00069: Protein kinase domain
A014074_01	0	0.717	0.125		At4g35480	zinc finger (C3HC4-type RING finger) family protein contains Pfam domain PF00097: Zinc finger, C3HC4 type (RING finger)
A014075_01	0	0.392	-0.043		At4g00490	beta-amylase, putative / 1,4-alpha-D-glucan maltohydrolase, putative similar to beta-amylase from SP:O64407 [Vigna unguiculata]; contains Pfam profile PF01373: Glycosyl hydrolase family 14
A014105_01	0	0.338	0.023		At4g26690	glycerophosphoryl diester phosphodiesterase family protein weak similarity to glycerophosphodiester phosphodiesterase [Borrelia hermsii] GI:1399038; contains Pfam profile PF03009: Glycerophosphoryl diester phosphodiesterase family
A014310_01	0	0.382	-0.131		At4g39400	brassinosteroid insensitive 1 (BRI1) identical to GI:2392895
A014348_01	0	1.106	-0.844		At4g11280	1-aminocyclopropane-1-carboxylate synthase 6 / ACC synthase 6 (ACS6) identical to GI:3746125
A014374_01	0	0.241	-0.306		At4g00880	auxin-responsive family protein similar to small auxin up RNA (GI:546362) {Arabidopsis thaliana}
A014426_01	0	0.193	-0.114		At4g18950	ankyrin protein kinase, putative similar to ankyrin-kinase [Medicago truncatula] gi|18700701|gb|AAL78674
A014779_01	0	0.338	-0.196		At4g22580	exostosin family protein contains Pfam profile: PF03016 Exostosin family
A014794_01	0	0.41	0.028		At4g17230	scarecrow-like transcription factor 13 (SCL13)
A014930_01	0	0.606	0.166		At4g38400	expansin family protein (EXPL2) contains Pfam profile: PF01357 pollen allergen; expansin-like gene, PMID:11641069, www.bio.psu.edu/expansins
A014941_01	0	0.263	-0.099		At4g14220	zinc finger (C3HC4-type RING finger) family protein contains Pfam profile: PF00097 zinc finger, C3HC4 type (RING finger)
A014946_01	0	0.493	-0.268		At4g30110	ATPase E1-E2 type family protein / haloacid dehalogenase-like hydrolase family protein / heavy-metal-associated domain-containing protein similar to cadmium efflux pump protein from Geobacillus stearothermophilus [GI:16753175], cadmium resistance protein
A015047_01	0	1.014	-0.327		At4g24380	expressed protein contains Pfam profile: PF03959 domain of unknown function (DUF341)
A015084_01	0	0.751	0.266		At4g34390	extra-large guanine nucleotide binding protein, putative / G-protein, putative similar to extra-large G-protein (XLG) [Arabidopsis thaliana] GI:3201680; contains Pfam profile PF00503: G-protein alpha subunit
A015456_01	0	0.412	-0.179		At4g38700	disease resistance-responsive family protein related to disease resistance response protein 206-d [Pisum sativum] gi|508844|gb|AAB18669G
A015464_01	0	0.267	-0.33		At4g37240	expressed protein
A015541_01	0	0.481	0.036		At5g60950	phytochelatin synthetase-related contains Pfam profile PF04833: Phytochelatin synthetase-like conserved region
A015777_01	0	0.024	-0.131		At5g56340	zinc finger (C3HC4-type RING finger) family protein contains Pfam domain, PF00097: Zinc finger, C3HC4 type (RING finger)
A015874_01	0	0.388	-0.097		At5g03380	heavy-metal-associated domain-containing protein similar to farnesylated protein ATFP2 [GI:4097545]; contains Pfam profile PF00403: Heavy-metal-associated domain
A015881_01	0	0.244	-0.043		At5g36880	acetyl-CoA synthetase, putative / acetate-CoA ligase, putative similar to SP|P27550 (Escherichia coli) and gi:8439651 (Homo sapiens); contains Pfam AMP-binding enzyme domain PF00501
A015903_01	0	0.391	0.116		At5g54470	zinc finger (B-box type) family protein similar to unknown protein (pir||T05755)
A015955_01	0	0.162	-0.047		At5g16730	expressed protein weak similarity to microtubule binding protein D-CLIP-190 [Drosophila melanogaster] GI:2773363, SMC2-like condensin [Arabidopsis thaliana] GI:14279543
A015973_01	0	0.301	-0.035		At5g58430	exocyst subunit EXO70 family protein leucine zipper-containing protein, Lycopersicon esculentum, PIR:S21495; contains Pfam domain PF03081: Exo70 exocyst complex subunit; similar to rexo70 (GI:2827160) {Rattus norvegicus}
A016204_01	0	0.339	-0.396		At5g55050	GDSL-motif lipase/hydrolase family protein similar to family II lipases EXL3 GI:15054386, EXL1 GI:15054382, EXL2 GI:15054384 from [Arabidopsis thaliana]; contains Pfam profile PF00657: GDSL-like Lipase/Acylhydrolase
A016222_01	0	0.294	-0.267		At5g64850	expressed protein
A016227_01	0	0.585	-0.496		At5g48540	33 kDa secretory protein-related contains Pfam PF01657: Domain of unknown function, duplicated in 33 KDa secretory proteins
A016237_01	0	0.412	-0.192		At5g64820	hypothetical protein
A016306_01	0	0.06	-0.184		At5g38290	peptidyl-tRNA hydrolase family protein contains Pfam profile PF01195: peptidyl-tRNA hydrolase
A016636_01	0	0.728	-0.376		At5g55450	protease inhibitor/seed storage/lipid transfer protein (LTP) family protein contains Pfam protease inhibitor/seed storage/LTP family domain PF00234
A016645_01	0	0.274	-0.217		At5g03990	expressed protein predicted protein, Arabidopsis thaliana
A016664_01	0	0.766	0.151		At5g04560	DEMETER protein (DME) identical to DEMETER protein [Arabidopsis thaliana] GI:21743571; contains Pfam profile PF00730: HhH-GPD superfamily base excision DNA repair protein
A016680_01	0	0.351	-0.043		At5g57000	expressed protein similar to unknown protein (gb|AAF21159.1)
A016708_01	0	0.742	-0.409		At5g03120	expressed protein
A016735_01	0	0.828	0.139		At5g11970	expressed protein
A016745_01	0	0.295	-0.006		At5g11800	K+ efflux antiporter, putative (KEA6) Monovalent cation:proton antiporter family 2 (CPA2 family) member, PMID:11500563; similar to glutathione-regulated potassium-efflux system protein KEFB, Escherichia coli, SWISSPROT:P45522
A016769_01	0	0.215	-0.018		At5g07320	mitochondrial substrate carrier family protein similar to peroxisomal Ca-dependent solute carrier [Oryctolagus cuniculus] GI:2352427 (mitochondrial carrier superfamily); contains INTERPRO:IPR001993 Mitochondrial substrate carrier family, INTERPRO:IPR00204
A016812_01	0	0.783	0.229		At5g08660	expressed protein contains Pfam domain PF05003: protein of unknown function (DUF668)
A016853_01	0	0.307	-0.268		At5g12140	cysteine protease inhibitor, putative / cystatin, putative similar to SP|P31726 Cystatin I precursor (CORN kernel cysteine proteinase inhibitor) {Zea mays}; contains Pfam profile PF00031: Cystatin domain
A016943_01	0	0.768	0.26		At5g02290	protein kinase, putative similar to protein kinase APK1A [Arabidopsis thaliana] SWISS-PROT:Q06548
A016950_01	0	0.687	-0.274		At5g61790	calnexin 1 (CNX1) identical to calnexin homolog 1, Arabidopsis thaliana, EMBL:AT08315 [SP|P29402]
A016969_01	0	0.355	-0.093		At5g62570	calmodulin-binding protein similar to calmodulin-binding protein TCB60 GI:1698548 from [Nicotiana tabacum]
A017088_01	0	0.415	-0.06		At5g15350	plastocyanin-like domain-containing protein contains plastocyanin-like domain Pfam:PF02298
A017118_01	0	0.214	-0.315		At5g61660	glycine-rich protein
A017131_01	0	0.482	-0.235		At5g44060	expressed protein similar to unknown protein (gb|AAD10670.1)
A017173_01	0	0.814	0.03		At5g54860	integral membrane transporter family protein contains 10 transmembrane domains; contains Pfam PF03092: BT1 family; contains TIGRFAMS TIGR00788: folate/biopterin transporter; similar to high affinity folic acid/methotrexate transporter 5 (GI:21898554) [Lei
A017394_01	0	0.976	0.026		At5g65870	phytosulfokines 5 (PSK5) identical to phytosulfokines 5 (PSK5) from [Arabidopsis thaliana]
A017426_01	0	0.607	-0.163		At5g14700	cinnamoyl-CoA reductase-related similar to cinnamoyl-CoA reductase from Pinus taeda [GI:17978649], Saccharum officinarum [GI:3341511]
A017523_01	0	0.164	-0.26		At5g64740	cellulose synthase, catalytic subunit, putative similar to gi:2827141 cellulose synthase catalytic subunit (Ath-A), Arabidopsis thaliana
A017884_01	0	0.295	0.027		At5g42650	allene oxide synthase (AOS) / hydroperoxide dehydrase / cytochrome P450 74A (CYP74A) identical to Allene oxide synthase, chloroplast precursor (Hydroperoxide dehydrase) (Cytochrome P450 74A) (SP:Q96242) {Arabidopsis thaliana}
A017885_01	0	0.216	-0.211		At5g50370	adenylate kinase, putative similar to adenylate kinase (ATP-AMP transphosphorylase) [Arabidopsis thaliana] SWISS-PROT:O82514
A017891_01	0	0.216	-0.066		At5g48970	mitochondrial substrate carrier family protein contains Pfam profile: PF00153 mitochondrial carrier protein
A017922_01	0	0.689	0.251		At5g04930	phospholipid-transporting ATPase 1 / aminophospholipid flippase 1 / magnesium-ATPase 1 (ALA1) nearly identical to SP|P98204 Phospholipid-transporting ATPase 1 (EC 3.6.3.1) (Aminophospholipid flippase 1) {Arabidopsis thaliana}; contains InterPro accession
A017998_01	0	0.381	-0.073		At5g44680	methyladenine glycosylase family protein similar to SP|P05100 DNA-3-methyladenine glycosylase I (EC 3.2.2.20) (3-methyladenine-DNA glycosylase I, constitutive) {Escherichia coli}; contains Pfam profile PF03352: Methyladenine glycosylase
A018032_01	0	0.567	-0.242		At5g09220	amino acid permease 2 (AAP2) identical to amine acid permease AAP2 [Arabidopsis thaliana] GI:510236
A018097_01	0	0.269	-0.117		At5g46330	leucine-rich repeat transmembrane protein kinase, putative
A018102_01	0	0.325	-0.063		At5g40910	disease resistance protein (TIR-NBS-LRR class), putative domain signature TIR-NBS-LRR exists, suggestive of a disease resistance protein. Non-consensus TT donor splice site at exon 1
A018315_01	0	0.182	-0.09		At5g13610	expressed protein
A018384_01	0	0.174	-0.169		At5g61560	protein kinase family protein contains protein kinase domain, Pfam:PF00069
A018600_01	0	0.61	0.002		At5g62350	invertase/pectin methylesterase inhibitor family protein / DC 1.2 homolog (FL5-2I22) similar to SP|Q42534 Pectinesterase 2 precursor (EC 3.1.1.11) (Pectin methylesterase 2) (PE 2) {Arabidopsis thaliana}; contains Pfam profile PF04043: Plant invertase/pect
A018725_01	0	0.758	-0.272		At5g44070	phytochelatin synthase 1 (PCS1) identical to phytochelatin synthase [Arabidopsis thaliana] gi|18254401|gb|AAL66747; identical to cDNA phytochelatin synthase, GI:18254400
A018742_01	0	0.41	0.118		At5g36290	expressed protein contains Pfam profile PF01169: Uncharacterized protein family UPF0016
A018752_01	0	0.316	0.002		At5g53370	pectinesterase family protein
A018764_01	0	0.376	-0.008		At5g54850	expressed protein
A018915_01	0	0.288	0.041		At5g65440	expressed protein
A018937_01	0	0.454	-0.096		At5g41800	amino acid transporter family protein similar to amino acid permease 1 [Nicotiana sylvestris] GI:976402; belongs to INTERPRO:IPR002422 amino acid/polyamine transporter, family II
A019015_01	0	0.654	0.201		At5g06750	protein phosphatase 2C family protein / PP2C family protein similar to Ser/Thr protein phosphatase 2C (PP2C6) (GI:15020818) [Arabidopsis thaliana]; similar to protein phosphatase 2C (GI:3608412) [Mesembryanthemum crystallinum]; contains Pfam PF00481 : Pro
A019032_01	0	0.433	-0.233		At5g66530	aldose 1-epimerase family protein similar to apospory-associated protein C; APOC [Chlamydomonas reinhardtii] GI:6970044; contains Pfam profile PF01263: Aldose 1-epimerase
A019084_01	0	0.302	-0.142		At5g17210	expressed protein
A019121_01	0	0.197	-0.175		At5g61010	exocyst subunit EXO70 family protein leucine zipper-containing protein, tomato, PIR:S21495; contains Pfam domain PF03081: Exo70 exocyst complex subunit; similar to rexo70 (GI:2827160) {Rattus norvegicus}
A019155_01	0	0.652	0.368		At5g15730	serine/threonine protein kinase, putative similar to protein-serine/threonine kinase [Nicotiana tabacum] gi|505146|dbj|BAA06538
A019195_01	0	0.407	0.116		At5g09240	transcriptional coactivator p15 (PC4) family protein similar to SP|P11031 Activated RNA polymerase II transcriptional coactivator p15 precursor (PC4) (p14) (Single-stranded DNA binding protein p9) {Mus musculus}; contains Pfam profile PF02229: Transcripti
A019221_01	0	0.737	0.238		At5g11250	disease resistance protein (TIR-NBS-LRR class), putative domain signature TIR-NBS-LRR exists, suggestive of a disease resistance protein.
A019247_01	0	0.456	-0.257		At5g06860	polygalacturonase inhibiting protein 1 (PGIP1) identical to polygalacturonase inhibiting protein 1 (PGIP1) [Arabidopsis thaliana] gi|7800199|gb|AAF69827; contains leucine rich-repeat (LRR) domains Pfam:PF00560, INTERPRO:IPR001611
A019496_01	0	0.917	0.063		At1g09210	calreticulin 2 (CRT2) identical to SP|Q38858 Calreticulin 2 precursor {Arabidopsis thaliana}
A019526_01	0	0.405	0.077		At4g35110	expressed protein
A019531_01	0	0.277	-0.284		At4g34710	arginine decarboxylase 2 (SPE2) identical to SP|O23141 Arginine decarboxylase 2 (EC 4.1.1.19) (ARGDC 2) (ADC 2) (ADC-N) {Arabidopsis thaliana}
A019584_01	0	0.557	-0.132		At4g05020	NADH dehydrogenase-related similar to alternative NADH-dehydrogenase [Yarrowia lipolytica] GI:3718005, 64 kDa mitochondrial NADH dehydrogenase [Neurospora crassa] GI:4753821; contains Pfam profile PF00070: Pyridine nucleotide-disulphide oxidoreductase
A019618_01	0	0.096	-0.134		At5g03030	DNAJ heat shock N-terminal domain-containing protein contains Pfam profile PF00226 DnaJ domain; DNAJ domain-containing protein, Homo sapiens, EMBL:AF126743
A019634_01	0	0.48	0.051		At3g27230	expressed protein
A019646_01	0	0.706	-0.252		At5g53830	VQ motif-containing protein contains PF05678: VQ motif
A019664_01	0	0.19	-0.01		At3g23660	transport protein, putative similar to Swiss-Prot:Q15436 protein transport protein Sec23A [Homo sapiens]
A019688_01	0	1.003	-0.577		At5g66650	expressed protein contains Pfam domain, PF04678: Protein of unknown function, DUF607
A019702_01	0	0.483	-0.588		At5g44130	fasciclin-like arabinogalactan-protein, putative similar to gi_13377784_gb_AAK20861
A019735_01	0	0.482	-0.354		At5g62070	calmodulin-binding family protein contains Pfam profile PF00612: IQ calmodulin-binding motif
A019785_01	0	0.955	0.076		At1g13210	haloacid dehalogenase-like hydrolase family protein similar to Potential phospholipid-transporting ATPase (EC 3.6.3.1) (Chromaffin granule ATPase) from {Homo sapiens} SP|Q9Y2Q0, {Mus musculus} SP|P98200, {Bos taurus} SP|Q29449; contains InterPro accession
A019826_01	0	0.235	-0.017		At2g47070	squamosa promoter-binding protein-like 1 (SPL1) identical to squamosa promoter binding protein-like 1 [Arabidopsis thaliana] GI:5931655; contains Pfam profile PF03110: SBP domain
A019843_01	0	1.035	-0.122		At2g38310	expressed protein low similarity to early flowering protein 1 [Asparagus officinalis] GI:1572683, SP|P80889 Ribonuclease 1 (EC 3.1.-.-) {Panax ginseng}
A019851_01	0	0.613	-0.21		At2g37710	lectin protein kinase, putative similar to receptor lectin kinase 3 [Arabidopsis thaliana] gi|4100060|gb|AAD00733; contains protein kinase domain, Pfam:PF00069; contains legume lectins alpha and beta domains, Pfam:PF00138 and Pfam:PF00139
A019963_01	0	0.516	-0.061		At1g74440	expressed protein similar to YGL010w-like protein GB:AAC32136 [Picea mariana]
A020151_01	0	0.636	0.083		At3g53370	DNA-binding S1FA family protein contains Pfam profile: PF04689 DNA binding protein S1FA
A020203_01	0	0.341	0.119		At1g26270	phosphatidylinositol 3- and 4-kinase family protein similar to phosphatidylinositol 4-kinase type-II beta [Homo sapiens] GI:20159767; contains Pfam profile PF00454: Phosphatidylinositol 3- and 4-kinase
A020239_01	0	0.869	-0.05		At5g59450	scarecrow-like transcription factor 11 (SCL11) scarecrow-like 11, Arabidopsis thaliana, EMBL:AF036307
A020265_01	0	0.207	-0.12		At4g13950	rapid alkalinization factor (RALF) family protein similar to RALF precursor [Nicotiana tabacum] GI:16566316
A020297_01	0	0.726	0.023		At4g24160	hydrolase, alpha/beta fold family protein contains Pfam profile PF00561: hydrolase, alpha/beta fold family
A020420_01	0	0.846	-0.429		At1g55450	embryo-abundant protein-related similar to embryo-abundant protein GI:1350531 from [Picea glauca]
A020482_01	0	0.854	0.164		At2g23810	senescence-associated family protein similar to senescence-associated protein 5 [Hemerocallis hybrid cultivar] gi|3551954|gb|AAC34855
A020546_01	0	0.522	0.116		At2g17220	protein kinase, putative similar to protein kinase APK1A [Arabidopsis thaliana] Swiss-Prot:Q06548
A020554_01	0	0.86	0.244		At2g06530	SNF7 family protein contains Pfam domain, PF03357: SNF7 family
A020599_01	0	0.24	-0.152		At1g79500	2-dehydro-3-deoxyphosphooctonate aldolase / phospho-2-dehydro-3-deoxyoctonate aldolase / 3-deoxy-D-manno-octulosonic acid 8-phosphate synthetase (KDSA) identical to Swiss-Prot:Q9AV97 2-dehydro-3-deoxyphosphooctonate aldolase (EC 4.1.2.16) (Phospho-2- dehy
A020625_01	0	0.748	0.292		At5g22060	DNAJ heat shock protein, putative strong similarity to SP|O60884 DnaJ homolog subfamily A member 2 (Dnj3) Homo sapiens, several plant DnaJ proteins from PGR; contains Pfam profiles PF00226 DnaJ domain, PF00684 DnaJ central domain (4 repeats), PF01556 DnaJ
A020631_01	0	0.914	0.018		At5g54720	ankyrin repeat family protein contains ankyrin repeats, Pfam:PF00023
A020698_01	0	0.989	-0.305		At1g73500	mitogen-activated protein kinase kinase (MAPKK), putative (MKK9) mitogen-activated protein kinase kinase (MAPKK) family, PMID:12119167
A020702_01	0	0.59	0.036		At4g30440	NAD-dependent epimerase/dehydratase family protein similar to nucleotide sugar epimerase from Vibrio vulnificus GI:3093975 [PID:g3093975], WbnF [Escherichia coli] GI:5739472, CAPI protein {Staphylococcus aureus} SP|P39858; contains Pfam profile PF01370 NA
A021034_01	0	0.447	0.099		At4g27440	protochlorophyllide reductase B, chloroplast / PCR B / NADPH-protochlorophyllide oxidoreductase B (PORB) identical to SP:P21218 protochlorophyllide reductase B, chloroplast precursor (EC 1.3.1.33) (PCR B) (NADPH-protochlorophyllide oxidoreductase B) (POR
A021070_01	0	0.413	0.042		At3g08580	ADP, ATP carrier protein 1, mitochondrial / ADP/ATP translocase 1 / adenine nucleotide translocator 1 (ANT1) identical to SWISS-PROT:P31167 ADP,ATP carrier protein 1 (Adenine nucleotide translocator 1) [Arabidopsis thaliana]
A021072_01	0	0.33	-0.212		At1g23130	Bet v I allergen family protein similar to Csf-2 [Cucumis sativus][GI:5762258][J Am Soc Hortic Sci 124, 136-139 (1999)]; location of ESTs gb|T45139 and gb|T43456 ; contains Pfam profile PF00407: Pathogenesis-related protein Bet v I family
A021074_01	0	0.5	-0.244		At1g03870	fasciclin-like arabinogalactan-protein (FLA9) identical to gi_13377784_gb_AAK20861
A021136_01	0	0.968	-0.011		At4g37640	calcium-transporting ATPase 2, plasma membrane-type / Ca(2+)-ATPase isoform 2 (ACA2) identical to SP|O81108 Calcium-transporting ATPase 2, plasma membrane-type (EC 3.6.3.8) (Ca(2+)-ATPase isoform 2) {Arabidopsis thaliana}
A021505_01	0	0.565	-0.703		At5g47330	palmitoyl protein thioesterase family protein
A022242_01	0	0.593	-0.106		At3g59310	expressed protein identical to anthocyanin-related membrane protein 1 [Arabidopsis thaliana] GI:16416383; supporting cDNA gi|16416382|dbj|AB060644.1|
A022482_01	0	1.099	-1.014		At3g50800	expressed protein
A022607_01	0	0.262	0.06		At4g15450	senescence/dehydration-associated protein-related similar to senescence-associated protein 12 [Hemerocallis hybrid cultivar] gi|3551958|gb|AAC34857; similar to early-responsive to dehydration stress ERD7 protein [Arabidopsis thaliana] gi|15320412|dbj|BAB6
A022782_01	0	0.189	-0.196		At3g26020	serine/threonine protein phosphatase 2A (PP2A) regulatory subunit B', putative similar to SWISS-PROT:Q28653 serine/threonine protein phosphatase 2A, 56 kDa regulatory subunit, delta isoform (PP2A, B subunit, B' delta isoform, PP2A, B subunit, B56 delta is
A022873_01	0	0.8	-0.058		At5g46710	zinc-binding family protein similar zinc-binding protein [Pisum sativum] GI:16117799; contains Pfam profile PF04640 : Protein of unknown function, DUF597
A022909_01	0	0.634	0.328		At5g13860	tumour susceptibility gene 101 (TSG101) family protein similar to SP|Q99816 Tumor susceptibility gene 101 protein {Homo sapiens}; contains Pfam profile PF05743: Tumour susceptibility gene 101 protein (TSG101)
A022922_01	0	0.149	-0.086		At5g22730	F-box family protein contains F-box domain Pfam:PF00646
A023080_01	0	0.306	0.059		At5g63370	protein kinase family protein contains protein kinase domain, Pfam:PF00069
A023354_01	0	0.194	-0.26		At2g23200	protein kinase family protein contains protein kinase domain, Pfam:PF00069
A023363_01	0	0.645	0.209		At2g32920	thioredoxin family protein similar to SP|Q15084 Protein disulfide isomerase A6 precursor (EC 5.3.4.1) {Homo sapiens}; contains Pfam profile PF00085: Thioredoxin
A023591_01	0	0.259	-0.052		At2g16430	purple acid phosphatase (PAP10) identical to purple acid phosphatase (PAP10) GI:20257482 from [Arabidopsis thaliana]
A023896_01	0	0.655	0.015		At1g64610	WD-40 repeat family protein contains Pfam PF00400: WD domain, G-beta repeat; similar to WD-repeat protein 5 (WD repeat protein BIG-3) (SP: Q9UGP9) [Homo sapiens]
A023913_01	0	0.256	-0.003		At1g68410	protein phosphatase 2C-related / PP2C-related similar to protein phosphatase-2C GB:AAC36697 from [Mesembryanthemum crystallinum]
A024198_01	0	0.499	0.195		At4g26810	SWIB complex BAF60b domain-containing protein contains Pfam profile PF02201: BAF60b domain of the SWIB complex
A024219_01	0	0.262	-0.146		At5g57710	heat shock protein-related contains similarity to 101 kDa heat shock protein; HSP101 [Triticum aestivum] gi|11561808|gb|AAC83689
A024226_01	0	0.482	-0.051		At1g74380	galactosyl transferase GMA12/MNN10 family protein very low similarity to alpha-1,2-galactosyltransferase, Schizosaccharomyces pombe [SP|Q09174]
A024311_01	0	0.47	0.029		At2g19620	Ndr family protein similar to SP|O23969 Pollen specific protein SF21 {Helianthus annuus}; contains Pfam profile PF03096: Ndr family
A024322_01	0	0.462	-0.275		At1g76160	multi-copper oxidase type I family protein similar to pollen-specific BP10 protein [SP|Q00624][Brassica napus]; contains Pfam profile: PF00394 Multicopper oxidase
A024390_01	0	0.827	-0.005		At1g34130	oligosaccharyl transferase STT3 subunit, putative similar to SP|P39007 Oligosaccharyl transferase STT3 subunit {Saccharomyces cerevisiae}; contains Pfam profile PF02516: Oligosaccharyl transferase STT3 subunit
A024438_01	0	0.375	-0.233		At2g34300	dehydration-responsive protein-related similar to early-responsive to dehydration stress ERD3 protein [Arabidopsis thaliana] GI:15320410; contains Pfam profile PF03141: Putative methyltransferase
A024444_01	0	0.634	-0.355		At3g28180	glycosyl transferase family 2 protein similar to beta-(1-3)-glucosyl transferase GB:AAC62210 GI:3687658 from [Bradyrhizobium japonicum], cellulose synthase from Agrobacterium tumeficiens [gi:710492] and Agrobacterium radiobacter [gi:710493]; contains Pfam
A024510_01	0	0.909	0.205		At3g05490	rapid alkalinization factor (RALF) family protein similar to RALF precursor [Nicotiana tabacum] GI:16566316
A024568_01	0	0.19	-0.121		At2g30880	pleckstrin homology (PH) domain-containing protein contains Pfam profile PF00169: PH domain
A024601_01	0	0.346	-0.079		At1g63220	C2 domain-containing protein similar to phloem protein RPP16 [Oryza sativa (japonica cultivar-group)] GI:21998839; contains Pfam profile PF00168: C2 domain
A024619_01	0	0.416	-0.19		At3g25500	formin homology 2 domain-containing protein / FH2 domain-containing protein contains formin homology 2 domain, Pfam:PF02181
A024621_01	0	0.465	-0.291		At2g46330	arabinogalactan-protein (AGP16) identical to gi|10880509|gb|AAG24284
A024647_01	0	0.274	-0.11		At3g28860	multidrug resistance P-glycoprotein, putative similar to mdr-like P-glycoprotein GI:3849833 from [Arabidopsis thaliana]; contains Pfam profiles PF00005: ABC transporter and PF00664: ABC transporter transmembrane region; identical to cDNA MDR-like p-glycop
A024651_01	0	0.384	0.136		At3g54110	plant uncoupling mitochondrial protein (PUMP) identical to plant uncoupling mitochondrial protein [Arabidopsis thaliana] GI:3115108
A024699_01	0	0.149	-0.179		At1g05300	metal transporter, putative (ZIP5) identical to putative metal transporter ZIP5 [Arabidopsis thaliana] gi|17385784|gb|AAL38432; similar to zinc transporter protein ZIP1 [Glycine max] gi|15418778|gb|AAK37761; member of the Zinc (Zn2+)-Iron (Fe2+) permease
A024785_01	0	0.283	-0.366		At1g48610	AT hook motif-containing protein contains Pfam profile PF02178: AT hook motif
A200032_01	0	0.422	0.168		At1g70790	C2 domain-containing protein similar to zinc finger and C2 domain protein GI:9957238 from [Arabidopsis thaliana]
A200092_01	0	0.3	-0.345		At4g08170	inositol 1,3,4-trisphosphate 5/6-kinase family protein similar to inositol phosphate kinase (GI:27549256) [Zea mays]; similar to inositol 1,3,4-trisphosphate 5/6-kinase (GI:3396079) [Arabidopsis thaliana]
A200130_01	0	0.77	0.177		At5g14930	leaf senescence-associated protein (SAG101) nearly identical to leaf senescence-associated gene SAG101 (putative acyl hydrolase) [Arabidopsis thaliana] GI:8699168; contains Pfam profile PF01764: Lipase
A200274_01	0	0.392	0.179		At1g07140	Ran-binding protein 1a (RanBP1a) identical to Ran-binding protein (atranbp1a) GI:2058282 from [Arabidopsis thaliana]
A200319_01	0	0.29	0.042		At1g09580	emp24/gp25L/p24 family protein similar to SP|P49755 Transmembrane protein Tmp21 precursor (21 kDa Transmembrane trafficking protein) {Homo sapiens}; contains Pfam profile PF01105: emp24/gp25L/p24 family
A200340_01	0	0.305	-0.131		At1g10630	ADP-ribosylation factor, putative similar to ADP-ribosylation factor GI:166586 from [Arabidopsis thaliana]
A200382_01	0	0.748	0.281		At1g14010	emp24/gp25L/p24 family protein similar to SP|P49755 Transmembrane protein Tmp21 precursor (21 kDa Transmembrane trafficking protein) {Homo sapiens}; contains Pfam profile PF01105: emp24/gp25L/p24 family
A200424_01	0	0.639	0.105		At1g17500	haloacid dehalogenase-like hydrolase family protein similar to Potential phospholipid-transporting ATPase (EC 3.6.3.1) from Homo sapiens [SP|O43520], Mus musculus [SP|P70704]; contains InterPro accession IPR005834: Haloacid dehalogenase-like hydrolase
A200462_01	0	0.177	-0.269		At1g19550	dehydroascorbate reductase, putative similar to dehydroascorbate reductase [Arabidopsis thaliana] gi|10952514|gb|AAG24946
A200493_01	0	0.463	0.208		At1g21370	expressed protein
A200533_01	0	0.522	-0.109		At1g24575	expressed protein
A200535_01	0	0.246	0.025		At1g25375	metallo-beta-lactamase family protein
A200548_01	0	0.658	-0.407		At1g27130	glutathione S-transferase, putative similar to glutathione S-transferase GB: AAF22517 GI:6652870 from [Papaver somniferum]
A200614_01	0	0.301	-0.053		At1g32975	hypothetical protein
A200618_01	0	0.371	-0.364		At1g33070	hypothetical protein
A200818_01	0	0.204	-0.045		At1g53530	signal peptidase I family protein contains similarity to SP|P28627 Mitochondrial inner membrane protease subunit 1 (EC 3.4.99.-) {Saccharomyces cerevisiae}; contains Pfam profile PF00461: Signal peptidase I
A200843_01	0	0.385	-0.401		At1g55120	beta-fructosidase, putative / beta-fructofuranosidase, putative similar to beta-fructofuranosidase GI:402740
A200954_01	0	0.823	-0.273		At1g65490	expressed protein
A200981_01	0	0.409	-0.515		At1g67865	expressed protein
A201019_01	0	1.145	-0.796		At1g72920	disease resistance protein (TIR-NBS class), putative domain signature TIR-NBS exists, suggestive of a disease resistance protein.
A201020_01	0	0.814	-0.153		At1g72930	Toll-Interleukin-Resistance (TIR) domain-containing protein domain signature TIR exists, suggestive of a disease resistance protein.
A201033_01	0	0.783	0.185		At1g74325	expressed protein ; expression supported by MPSS
A201107_01	0	0.378	-0.035		At2g02130	plant defensin-fusion protein, putative (PDF2.3) plant defensin protein family member, personal communication, Bart Thomma (Bart.Thomma@agr.kuleuven.ac.be)
A201592_01	0	0.31	-0.081		At3g06540	GDP dissociation inhibitor family protein / Rab GTPase activator family protein similar to SP|P26374 Rab proteins geranylgeranyltransferase component A 2 (Rab escort protein 2) {Homo sapiens}; contains Pfam profile PF00996: GDP dissociation inhibitor
A201618_01	0	0.767	-0.115		At3g10640	SNF7 family protein contains Pfam domain, PF03357: SNF7 family
A201620_01	0	0.01	-0.124		At3g10915	reticulon family protein low similarity to rS-Rex-s [Rattus norvegicus] GI:1143717, neuroendocrine-specific protein C [Homo sapiens] GI:307311; contains Pfam profile PF02453: Reticulon
A201700_01	0	0.549	0.162		At3g19130	RNA-binding protein, putative similar to RNA Binding Protein 47 [Nicotiana plumbaginifolia] GI:9663769, DNA binding protein ACBF GB:AAC49850 from [Nicotiana tabacum]; contains InterPro entry IPR000504: RNA-binding region RNP-1 (RNA recognition motif) (RRM
A201715_01	0	0.576	-0.203		At3g20865	arabinogalactan-protein, putative (AGP) similar to gi|10880503|gb|AAG24281
A201721_01	0	0.782	0.405		At3g21140	expressed protein
A202015_01	0	0.628	0.127		At3g58930	F-box family protein contains F-box domain Pfam:PF00646
A202058_01	0	0.261	-0.269		At4g01220	expressed protein
A202187_01	0	0.447	0.043		At4g08500	mitogen-activated protein kinase kinase, putative similar to mitogen-activated protein kinase MEKK1 GP|1255448 [Arabidopsis thaliana]
A202292_01	0	0.202	-0.141		At4g16265	DNA-directed RNA polymerase II, putative similar to SP|P36958 DNA-directed RNA polymerase II 15.1 kDa polypeptide (EC 2.7.7.6) {Drosophila melanogaster}; contains Pfam profile PF02150: RNA polymerases M/15 Kd subunit
A202353_01	0	0.674	-0.544		At4g19515	disease resistance family protein similar to downy mildew resistance protein RPP5 [Arabidopsis thaliana] GI:6449046; contains Pfam profile PF01582: TIR domain
A202354_01	0	0.515	-0.525		At4g19520	disease resistance protein (TIR-NBS-LRR class), putative domain signature TIR-NBS-LRR exists, suggestive of a disease resistance protein.
A202388_01	0	0.242	-0.243		At4g22160	expressed protein
A202398_01	0	0.467	-0.424		At4g23710	vacuolar ATP synthase subunit G 2 (VATG2) / V-ATPase G subunit 2 (VAG2) / vacuolar proton pump G subunit 2 identical to Swiss-Prot:O82629 vacuolar ATP synthase subunit G 2 (V-ATPase G subunit 2, Vacuolar proton pump G subunit 2) [Arabidopsis thaliana]
A202609_01	0	0.368	-0.156		At5g18340	U-box domain-containing protein weak similarity to immediate-early fungal elicitor protein CMPG1 [Petroselinum crispum] GI:14582200; contains Pfam profile PF04564: U-box domain
A202620_01	0	0.481	-0.105		At5g18500	protein kinase family protein contains protein kinase domain, Pfam:PF00069
A202628_01	0	0.253	-0.025		At5g18600	glutaredoxin family protein contains glutaredoxin domain, INTERPRO:IPR002109
A202674_01	0	0.907	0.003		At5g19230	expressed protein
A202675_01	0	0.652	-0.019		At5g19240	expressed protein
A202676_01	0	0.273	-0.096		At5g19250	expressed protein
A202729_01	0	0.138	-0.129		At5g20080	NADH-cytochrome b5 reductase, putative similar to SP|P36060 NADH-cytochrome b5 reductase precursor (EC 1.6.2.2) {Saccharomyces cerevisiae}; contains Pfam profiles PF00175: Oxidoreductase NAD-binding domain, PF00970: oxidoreductase, FAD-binding
A202852_01	0	0.485	0.01		At5g25170	expressed protein
A203264_01	0	0.71	-0.8		At5g44575	expressed protein
A203266_01	0	0.211	0.017		At5g44710	expressed protein similar to unknown protein (ref|NP_011731.1)
A203285_01	0	0.344	-0.139		At5g47420	expressed protein contains Pfam domain, PF01987: Protein of unknown function
A203310_01	0	0.932	0.077		At5g50460	protein transport protein SEC61 gamma subunit, putative similar to Swiss-Prot:Q19967 protein transport protein SEC61 gamma subunit [Caenorhabditis elegans]
A203366_01	0	0.322	-0.105		At5g58990	expressed protein
A203419_01	0	0.956	-0.013		At5g65920	U-box domain-containing protein low similarity to immediate-early fungal elicitor protein CMPG1 [Petroselinum crispum] GI:14582200; contains Pfam profile PF04564: U-box domain
A203423_01	0	0.564	-0.017		At5g66675	expressed protein
At30000019	0	0.723	0.223		At1g01140	CBL-interacting protein kinase 9 (CIPK9) identical to CBL-interacting protein kinase 9 [Arabidopsis thaliana] gi|13249117|gb|AAK16684; contains Pfam profiles PF00069: Protein kinase domain and PF03822: NAF domain; identical to cDNA CBL-interacting protein
At30000284	0	0.107	-0.227		At1g03430	two-component phosphorelay mediator, putative strong similarity to ATHP1 [Arabidopsis thaliana] GI:4156241
At30000299	0	0.353	0.09		At1g03590	protein phosphatase 2C family protein / PP2C family protein similar to protein phosphatase-2C; PP2C (GI:3643088) [Mesembryanthemum crystallinum]; contains Pfam PF00481 : Protein phosphatase 2C domain;
At30000417	0	0.174	-0.08		At1g04630	expressed protein
At30000530	0	0.748	-0.291		At1g05630	endonuclease/exonuclease/phosphatase family protein similar to inositol 1,4,5-trisphosphate 5-phosphatase (GI:4688596) [Arabidopsis thaliana]
At30000892	0	0.253	-0.074		At1g08650	phosphoenolpyruvate carboxylase kinase identical to phosphoenolpyruvate carboxylase kinase [Arabidopsis thaliana] gi|6318613|gb|AAF06968; contains protein kinase domain, Pfam:PF00069
At30001394	0	0.601	-0.091		At1g12990	glycosyl transferase family 17 protein low similarity to beta-1,4-mannosyl-glycoprotein beta-1,4-N-acetylglucosaminyltransferase (EC 2.4.1.144) from Mus musculus [SP|Q10470], Rattus norvegicus [SP|Q02527], Homo sapiens [SP|Q09327]; contains Pfam profile P
At30001633	0	0.042	-0.06		At1g15140	oxidoreductase NAD-binding domain-containing protein Contains Pfam profile PF00175: Oxidoreductase NAD-binding domain; ESTs gb|H76345 and gb|AA651465 come from this gene
At30002213	0	1.003	-0.067		At1g20510	4-coumarate--CoA ligase family protein / 4-coumaroyl-CoA synthase family protein similar to SP|P14912 and SP|P14913 from Petroselinum crispum; contains Pfam AMP-binding enzyme domain PF00501
At30002347	0	0.765	0.346		At1g21750	protein disulfide isomerase, putative similar to SP|P29828 Protein disulfide isomerase precursor (PDI) (EC 5.3.4.1) {Medicago sativa}; isoform contains non-consensus GA donor splice site at intron 9
At30002642	0	0.384	-0.022		At1g24265	expressed protein
At30002811	0	0.554	-0.657		At1g26770	expansin, putative (EXP10) similar to expansin At-EXP1 GI:1041702 from [Arabidopsis thaliana]; alpha-expansin gene family, PMID:11641069
At30002975	0	0.217	-0.334		At1g28210	DNAJ heat shock protein, putative strong similarity to mitochondrial DnaJ protein (AtJ1) GI:564030 from [Arabidopsis thaliana]; contains Pfam profiles PF00226: DnaJ domain, PF01556: DnaJ C terminal region, PF00684: DnaJ central domain (4 repeats); identic
At30003528	0	0.187	-0.178		At1g33730	cytochrome P450, putative Similar to cytochrome P450 76C2 (SP:O64637)[Arabidopsis thaliana]; contains Pfam profile: PF00067 cytochrome P450
At30003984	0	0.101	-0.222		At1g47240	NRAMP metal ion transporter 2, putative (NRAMP2) similar to metal transporter Nramp3 [Arabidopsis thaliana] gi|6468012|gb|AAF13278; member of the natural resistance-associated macrophage protein (NRAMP) metal transporter family, PMID:11500563
At30004638	0	0.809	-0.037		At1g53430	leucine-rich repeat family protein / protein kinase family protein contains Pfam domains PF00560: Leucine Rich Repeat and PF00069: Protein kinase domain
At30004881	0	0.232	-0.107		At1g55535	expressed protein
At30004976	0	0.145	-0.167		At1g56330	GTP-binding protein (SAR1B) identical to GTP-binding protein (SAR1B) [Arabidopsis thaliana] SP:Q01474
At30005458	0	0.764	0.343		At1g62790	protease inhibitor/seed storage/lipid transfer protein (LTP) family protein contains Pfam protease inhibitor/seed storage/LTP family domain PF00234
At30005517	0	0.488	-0.044		At1g63260	senescence-associated family protein similar to senescence-associated protein 5 [Hemerocallis hybrid cultivar] gi|3551954|gb|AAC34855
At30005919	0	0.298	-0.254		At1g66940	protein kinase-related
At30005920	0	0.218	-0.235		At1g66940	protein kinase-related
At30006025	0	0.564	0.156		At1g67860	expressed protein
At30006051	0	0.597	0.131		At1g68060	expressed protein
At30006157	0	0.476	-0.15		At1g69030	BSD domain-containing protein contains Pfam profile PF03909: BSD domain
At30006243	0	0.461	0.171		At1g69750	cox19 family protein contains Pfam profile PF05490: Cox19 protein
At30006368	0	0.434	0.089		At1g70850	Bet v I allergen family protein similar to Csf-2 [Cucumis sativus][GI:5762258][J Am Soc Hortic Sci 124, 136-139 (1999)] contains Pfam profile PF00407: Pathogenesis-related protein Bet v I family
At30006371	0	0.783	-0.461		At1g70890	major latex protein-related / MLP-related low similarity to major latex protein {Papaver somniferum}[GI:294062] ; contains Pfam profile PF00407: Pathogenesis-related protein Bet v I family
At30006582	0	1.332	-1.068		At1g72910	disease resistance protein (TIR-NBS class), putative domain signature TIR-NBS exists, suggestive of a disease resistance protein.
At30008526	0	0.693	-0.475		At2g16900	expressed protein
At30008840	0	0.815	0.083		At2g19800	expressed protein similar to myo-inositol oxygenase [Sus scrofa] gi|17432544|gb|AAL39076
At30008935	0	0.354	-0.17		At2g20630	protein phosphatase 2C, putative / PP2C, putative
At30008976	0	0.174	-0.063		At2g20900	diacylglycerol kinase, putative contains INTERPRO domain, IPR001206, DAG-kinase catalytic domain
At30009631	0	0.221	-0.266		At2g27030	calmodulin-2/3/5 (CAM5) (TCH1) identical to calmodulin GI:474183 from [Arabidopsis thaliana], SP|P25069 Calmodulin-2/3/5 {Arabidopsis thaliana}
At30009756	0	0.764	-0.826		At2g28080	glycosyltransferase family protein contains Pfam profile: PF00201 UDP-glucoronosyl and UDP-glucosyl transferase
At30009832	0	0.302	-0.131		At2g28740	histone H4 identical to histone H4 from Lycopersicon esculentum GI:297150, Lolium temulentum SP|P02308, Acropora formosa GI:455652, Citrus jambhiri GI:16797797
At30010066	0	0.22	0.056		At2g30880	pleckstrin homology (PH) domain-containing protein contains Pfam profile PF00169: PH domain
At30010473	0	0.168	-0.219		At2g34355	nodulin-related contains 14 transmembrane domains; supported by tandem duplication of nodulin -related protein (TIGR_Ath1:At2g34350) [Arabidopsis thaliana]
At30010494	0	0.599	-0.028		At2g34510	expressed protein contains Pfam profile PF04862: Protein of unknown function, DUF642
At30010629	0	0.93	-0.927		At2g35710	glycogenin glucosyltransferase (glycogenin)-related low similarity to glycogenin-2 from Homo sapiens [SP|O15488]
At30010855	0	0.451	-0.425		At2g37620	actin 1 (ACT1) identical to SP|P10671 Actin 1 (Actin 3) {Arabidopsis thaliana}
At30011303	0	0.917	0.145		At2g41430	dehydration-induced protein (ERD15) identical to dehydration-induced protein ERD15 GI:710626 from [Arabidopsis thaliana]
At30011869	0	0.848	-0.556		At2g46330	arabinogalactan-protein (AGP16) identical to gi|10880509|gb|AAG24284
At30011871	0	0.596	-0.049		At2g46330	arabinogalactan-protein (AGP16) identical to gi|10880509|gb|AAG24284
At30011958	0	0.684	-0.645		At2g47060	serine/threonine protein kinase, putative similar to Pto kinase interactor 1 (Pti1)[Lycopersicon esculentum] gi|3668069|gb|AAC61805
At30012093	0	0.164	-0.048		At3g01050	expressed protein
At30012846	0	0.391	-0.349		At3g07380	expressed protein
At30012855	0	0.595	0.31		At3g07460	expressed protein contains Pfam profile PF04398: Protein of unknown function, DUF538
At30012857	0	0.514	0.197		At3g07460	expressed protein contains Pfam profile PF04398: Protein of unknown function, DUF538
At30012989	0	0.095	-0.156		At3g08990	yippee family protein similar to qdgl-1 [Coturnix coturnix] GI:10441650, Yippee protein [Drosophila melanogaster] GI:5713279; contains Pfam profile PF03226: Yippee putative zinc-binding protein
At30013313	0	0.644	0.33		At3g11650	harpin-induced family protein / HIN1 family protein / harpin-responsive family protein / NDR1/HIN1-like protein 2 identical to NDR1/HIN1-Like protein 2 (GP:9502174) [Arabidopsis thaliana]; similar to hin1 GB:CAA68848 [Nicotiana tabacum]
At30013823	0	0.618	0.275		At3g15710	signal peptidase, putative similar to SP|P13679 Microsomal signal peptidase 21 kDa subunit (EC 3.4.-.-) {Canis familiaris}; contains Pfam profile: PF00461 signal peptidase I
At30013854	0	0.389	-0.094		At3g15980	coatomer protein complex, subunit beta 2 (beta prime), putative contains 7 WD-40 repeats (PF00400) (1 weak); identical to coatomer protein complex, beta prime (beta'-COP) protein {Arabidopsis thaliana} (GI:9294445); similar to Coatomer beta' subunit (Beta
At30013940	0	0.056	-0.117		At3g16760	tetratricopeptide repeat (TPR)-containing protein low similarity to TPR-containing protein involved in spermatogenesis TPIS [Mus musculus] GI:6272682; contains Pfam profile PF00515: tetratricopeptide repeat (TPR) domain
At30014014	0	0.555	-0.147		At3g17390	S-adenosylmethionine synthetase, putative similar to S-adenosylmethionine synthetase 2 (Methionine adenosyltransferase 2, AdoMet synthetase 2) [Catharanthus roseus] SWISS-PROT:Q96552
At30015138	0	0.173	-0.195		At3g27470	expressed protein contains Pfam profile PF05212: Protein of unknown function (DUF707)
At30015766	0	0.523	-0.133		At3g44630	disease resistance protein RPP1-WsB-like (TIR-NBS-LRR class), putative domain signature TIR-NBS-LRR exists, suggestive of a disease resistance protein., closest Col-0 homolog to RPP1-WsB
At30015970	0	0.33	-0.262		At3g46600	scarecrow transcription factor family protein scarecrow-like 11 - Arabidopsis thaliana, EMBL:AF036307
At30015993	0	0.167	0.052		At3g46830	Ras-related protein (RAB11A) / small GTP-binding protein, putative identical to SP|Q96283 Ras-related protein Rab11A {Arabidopsis thaliana}; identical to cDNA Rab11 protein GI:2598228
At30016136	0	0.379	-0.233		At3g48100	two-component responsive regulator / response regulator 5 (ARR5) / response reactor 2 (RR2) identical to responce reactor2 (AtRR2) [Arabidopsis thaliana] GI:3273198, response regulator 5 (ARR5) [Arabidopsis thaliana] GI:3953599; contains Pfam profile: PF0
At30016567	0	0.64	0.152		At3g52100	PHD finger family protein contains Pfam profile PF00628: PHD-finger
At30017183	0	1.029	-0.073		At3g57530	calcium-dependent protein kinase, putative / CDPK, putative similar to calmodulin-domain protein kinase CDPK isoform 7 [Arabidopsis thaliana] gi|1399277|gb|AAB03247
At30017487	0	0.316	-0.1		At3g60320	expressed protein contains Pfam profiles: PF04782: protein of unknown function (DUF632), PF04783: protein of unknown function (DUF630)
At30017498	0	0.122	-0.131		At3g60410	expressed protein
At30017560	0	0.326	-0.167		At3g60990	expressed protein
At30017576	0	0.407	-0.119		At3g61150	homeobox-leucine zipper family protein / homeodomain GLABRA2 like protein 1 (HD-GL2-1) similar to Anthocyaninless2 (ANL2) (GP:5702094) Arabidopsis thaliana, EMBL:AF077335
At30017632	0	0.603	0.238		At3g61640	arabinogalactan-protein (AGP20)
At30017746	0	0.148	-0.133		At3g62660	glycosyl transferase family 8 protein low similarity to glycosyl transferase lgtC - Neisseria gonorrhoeae, EMBL:AF208062; contains Pfam glycosyl transferase family 8 domain PF01501
At30017980	0	0.652	0.031		At4g00970	protein kinase family protein contains Pfam domain PF00069: Protein kinase domain
At30018037	0	0.163	-0.083		At4g01450	nodulin MtN21 family protein similar to MtN21 GI:2598575 (root nodule development) from [Medicago truncatula]
At30018131	0	1.011	-0.153		At4g02200	drought-responsive family protein similar to drought-induced mRNA, Di19 [Arabidopsis thaliana] gi|469110|emb|CAA55321
At30018132	0	0.933	-0.361		At4g02200	drought-responsive family protein similar to drought-induced mRNA, Di19 [Arabidopsis thaliana] gi|469110|emb|CAA55321
At30018232	0	0.097	-0.165		At4g03110	RNA-binding protein, putative similar to Etr-1 [Danio rerio] GI:7670536, BRUNO-like 6 RNA-binding protein [Homo sapiens] GI:15341327, CUG-BP and ETR-3 like factor 3 [Homo sapiens] GI:12746392; contains InterPro entry IPR000504: RNA-binding region RNP-1 (R
At30018249	0	0.244	-0.004		At4g03205	coproporphyrinogen III oxidase, putative / coproporphyrinogenase, putative / coprogen oxidase, putative
At30019410	0	0.708	-0.15		At4g15660	glutaredoxin family protein contains INTERPRO Domain IPR002109, Glutaredoxin (thioltransferase)
At30019411	0	0.752	-0.367		At4g15670	glutaredoxin family protein contains INTERPRO Domain IPR002109, Glutaredoxin (thioltransferase)
At30019413	0	0.859	-0.02		At4g15690	glutaredoxin family protein contains INTERPRO Domain IPR002109, Glutaredoxin (thioltransferase)
At30019414	0	0.684	0.206		At4g15700	glutaredoxin family protein contains INTERPRO Domain IPR002109, Glutaredoxin (thioltransferase)
At30019441	0	0.492	-0.34		At4g15920	nodulin MtN3 family protein similar to MtN3 GI:1619602 (root nodule development) from [Medicago truncatula]
At30020009	0	0.614	-0.265		At4g20830	FAD-binding domain-containing protein similar to SP|P30986 reticuline oxidase precursor (Berberine-bridge-forming enzyme) (BBE) (Tetrahydroprotoberberine synthase) [Eschscholzia californica]; contains PF01565 FAD binding domain
At30020157	0	0.185	-0.169		At4g22160	expressed protein
At30020278	0	0.649	0.178		At4g23170	protein kinase family protein contains Pfam PF01657: Domain of unknown function; similar to receptor-like protein kinase 5 (GI:13506747) {Arabidopsis thaliana}; similar to receptor-like protein kinase 4 (GI:13506745) [Arabidopsis thaliana]
At30020917	0	0.547	0.09		At4g28550	RabGAP/TBC domain-containing protein similar to SP|P09379 GTPase-activating protein GYP7 (Fragment) {Yarrowia lipolytica}; contains Pfam profile PF00566: TBC domain
At30020925	0	0.145	-0.213		At4g28630	ABC transporter family protein identical to half-molecule ABC transporter ATM1 GI:9964117 from [Arabidopsis thaliana]
At30021068	0	0.518	0.107		At4g29900	calcium-transporting ATPase, plasma membrane-type, putative / Ca2+-ATPase, putative (ACA10) identical to SP|Q9SZR1 Potential calcium-transporting ATPase 10, plasma membrane-type (EC 3.6.3.8) (Ca(2+)-ATPase isoform 10) {Arabidopsis thaliana}; similar to SP
At30021102	0	0.451	-0.003		At4g30210	NADPH-cytochrome p450 reductase, putative / NADPH-ferrihemoprotein reductase, putative similar to NADPH-cytochrome P450 oxydoreductase from [Populus balsamifera subsp. trichocarpa x Populus deltoides] GI:13183564, GI:13183566
At30021138	0	0.348	-0.289		At4g30510	transport protein-related weak similarity to Gsa12p [Pichia pastoris] GI:18307769; contains 1 WD-40 repeat (PF00400); similar to several hypothetical proteins
At30021448	0	0.867	0.251		At4g33050	calmodulin-binding family protein contains Pfam profile PF00612: IQ calmodulin-binding motif
At30021938	0	0.657	0.206		At4g37260	myb family transcription factor (MYB73) contains Pfam profile: PF00249 myb-like DNA-binding domain
At30022435	0	0.405	-0.01		At5g02450	60S ribosomal protein L36 (RPL36C) 60S ribosomal protein L36, Arabidopsis thaliana, EMBL:AC004684
At30022577	0	0.201	-0.082		At5g03690	fructose-bisphosphate aldolase, putative similar to PIR|S65073 fructose-bisphosphate aldolase (EC 4.1.2.13) isoenzyme C-1, cytosolic [Oryza sativa]; contains Pfam profile PF00274 Fructose-bisphosphate aldolase class-I
At30022771	0	0.361	0.18		At5g05460	glycosyl hydrolase family 85 protein contains similarity to endo-b-N-acetylglucosaminidase GI:13774138 from [Mucor hiemalis]
At30023505	0	0.425	-0.203		At5g12330	lateral root primordium 1 (LRP1) identical to lateral root primordium 1 (LRP1) [Arabidopsis thaliana] GI:882341; contains Pfam profile PF05142: Domain of unknown function (DUF702)
At30024485	0	0.046	-0.077		At5g22050	protein kinase family protein contains protein kinase domain, INTERPRO:IPR000719
At30024975	0	0.318	-0.239		At5g26667	uridylate kinase / uridine monophosphate kinase / UMP kinase (PYR6) identical to uridylate kinase / UMP/CMP kinase SP:O04905 from [Arabidopsis thaliana]
At30024976	0	0.41	-0.209		At5g26667	uridylate kinase / uridine monophosphate kinase / UMP kinase (PYR6) identical to uridylate kinase / UMP/CMP kinase SP:O04905 from [Arabidopsis thaliana]
At30025189	0	1.03	-0.069		At5g28540	luminal binding protein 1 (BiP-1) (BP1) SWISS-PROT:Q9LKR3 PMID:8888624
At30025943	0	0.211	-0.302		At5g41100	expressed protein
At30026040	0	0.703	-0.158		At5g42020	luminal binding protein 2 (BiP-2) (BP2) similar to SWISS-PROT: Q39043; GI:1303695; luminal binding protein (BiP) [Arabidopsis thaliana]
At30026041	0	0.915	-0.192		At5g42020	luminal binding protein 2 (BiP-2) (BP2) similar to SWISS-PROT: Q39043; GI:1303695; luminal binding protein (BiP) [Arabidopsis thaliana]
At30026370	0	0.299	0.017		At5g44860	expressed protein strong similarity to unknown protein (gb AAC79135.1)
At30026427	0	1.019	-0.369		At5g45340	cytochrome P450 family protein similar to SP|Q42569|C901_ARATH Cytochrome P450 90A1 (SP:Q42569) [Arabidopsis thaliana]; contains Pfam profile: PF00067: Cytochrome P450
At30026428	0	0.875	-0.923		At5g45340	cytochrome P450 family protein similar to SP|Q42569|C901_ARATH Cytochrome P450 90A1 (SP:Q42569) [Arabidopsis thaliana]; contains Pfam profile: PF00067: Cytochrome P450
At30026710	0	0.257	-0.225		At5g47720	acetyl-CoA C-acyltransferase, putative / 3-ketoacyl-CoA thiolase, putative strong similarity to Acetoacetyl-coenzyme A thiolase (E.C. 2.3.1.9) [Raphanus sativus] GI:1542941; contains InterPro accession IPR002155: Thiolase
At30027146	0	0.488	0.159		At5g51620	expressed protein
At30027424	0	0.402	-0.299		At5g54100	band 7 family protein similar to stomatin-like protein [Zea mays] GI:7716464; contains Pfam profile PF01145: SPFH domain / Band 7 family
At30027453	0	0.695	0.027		At5g54380	protein kinase family protein contains protein kinase domain, Pfam:PF00069
At30028025	0	0.475	-0.398		At5g59320	lipid transfer protein 3 (LTP3) identical to lipid transfer protein 3 from Arabidopsis thaliana [gi:8571921]; contains Pfam protease inhibitor/seed storage/LTP family domain PF00234
At30028169	0	0.104	-0.16		At5g60570	kelch repeat-containing F-box family protein contains Pfam:PF01344 Kelch motif, Pfam:PF00646 F-box domain
At30028599	0	0.682	0.239		At5g64360	DNAJ heat shock N-terminal domain-containing protein low similarity to AHM1 [Triticum aestivum] GI:6691467; contains Pfam profile PF00226 DnaJ domain
A006115_01	0	0.187	-0.133		At2g39580	expressed protein
A007937_01	0	0.754	0.324		At2g46150	expressed protein and genefinder
A008655_01	0	0.226	-0.039		At2g40800	expressed protein
A008698_01	0	0.573	-0.056		At2g44840	ethylene-responsive element-binding protein, putative
A010131_01	0	0.543	0.185		At3g57120	protein kinase family protein contains eukaryotic protein kinase domain, INTERPRO:IPR000719
A011288_01	0	0.492	-0.14		At3g54030	protein kinase family protein contains protein kinase domain, Pfam:PF00069
A015156_01	0	1.13	-0.591		At4g20780	calcium-binding protein, putative similar to SP|Q09011 Calcium-binding protein CAST {Solanum tuberosum}; contains INTERPRO:IPR002048 calcium-binding EF-hand domain
A015941_01	0	0.343	-0.306		At5g65280	lanthionine synthetase C-like family protein contains Pfam domain, PF05147: Lanthionine synthetase C-like protein
A017042_01	0	0.444	-0.042		At5g64860	4-alpha-glucanotransferase, putative / disproportionating enzyme, putative similar to 4-alpha-glucanotransferase SP:Q06801 from [Solanum tuberosum]
A022480_01	0	0.378	-0.166		At3g47820	armadillo/beta-catenin repeat family protein / U-box domain-containing protein contains Pfam domain, PF00514: Armadillo/beta-catenin-like repeats and Pfam, PF04564: U-box domain
A023883_01	0	0.248	-0.035		At1g64080	expressed protein identical to hypothetical protein GB:AAF24565 GI:6692100 from [Arabidopsis thaliana]
A024183_01	0	0.297	0.011		At5g55930	oligopeptide transporter OPT family protein similar to SP|P40900 Sexual differentiation process protein isp4 {Schizosaccharomyces pombe}, oligopeptide transporter Opt1p [Candida albicans] GI:2367386; contains Pfam profile PF03169: OPT oligopeptide transpo
A024262_01	0	0.291	0.003		At4g11680	zinc finger (C3HC4-type RING finger) family protein low similarity to SP|Q9WTV7 RING finger protein 12 (LIM domain interacting RING finger protein) {Mus musculus}; contains Pfam profile PF00097: Zinc finger, C3HC4 type (RING finger)
A202683_01	0	0.406	0.137		At5g19340	expressed protein
At30009499	0	0.798	-0.246		At2g25840	tRNA synthetase class I (W and Y) family protein contains Pfam profile: PF00579 tRNA synthetases class I (W and Y)
At30027755	0	0.544	-0.213		At5g57070	hydroxyproline-rich glycoprotein family protein Common family members: At5g26070, At5g19800, At1g72790 [Arabidopsis thaliana]
A017655_01	0	0.702	-0.21		At5g45830	expressed protein low similarity to tumor-related protein [Nicotiana glauca x Nicotiana langsdorffii] GI:688423

## Sheet: SOM2 Down
Oligo ID	Mock	TEV	TEV-At		Gene	Annotation
A000336_01	0	1.146	0.438		At1g63830	proline-rich family protein contains proline-rich extensin domains, INTERPRO:IPR002965; contains 1 predicted transmembrane domain
A000788_01	0	1.09	0.415		At1g30900	vacuolar sorting receptor, putative similar to BP-80 vacuolar sorting receptor [Pisum sativum] GI:1737222
A001013_01	0	2.152	0.86		At1g51090	heavy-metal-associated domain-containing protein contains Pfam profile PF00403: Heavy-metal-associated domain
A001044_01	0	2.077	1.413		At1g75040	pathogenesis-related protein 5 (PR-5) identical to SP|P28493 Pathogenesis-related protein 5 precursor (PR-5) {Arabidopsis thaliana}; contains Pfam profile: PF00314 Thaumatin family
A001065_01	0	2.155	0.009		At1g07135	glycine-rich protein
A001156_01	0	1.2	-0.344		At1g06830	glutaredoxin family protein contains INTERPRO Domain IPR002109, Glutaredoxin (thioltransferase)
A001352_01	0	1.363	0.451		At1g74710	isochorismate synthase 1 (ICS1) / isochorismate mutase identical to GI:17223087 and GB:AF078080; contains Pfam profile PF00425: chorismate binding enzyme; contains TIGRfam profile TIGR00543: isochorismate synthases; identical to cDNA isochorismate synthas
A001617_01	0	1.259	0.588		At1g24140	matrixin family protein similar to matrix metalloproteinase [Cucumis sativus] GI:7159629; contains InterPro accession IPR001818: Matrixin
A001653_01	0	0.942	0.324		At1g66080	expressed protein
A001663_01	0	1.042	-0.066		At1g11960	early-responsive to dehydration protein-related / ERD protein-related low similarity to ERD4 protein [Arabidopsis thaliana] GI:15375406
A001895_01	0	1.525	0.518		At1g58420	expressed protein
A002225_01	0	1.073	0.088		At1g78410	VQ motif-containing protein contains PF05678: VQ motif
A002784_01	0	0.926	0.388		At1g61640	ABC1 family protein contains Pfam domain, PF03109: ABC1 family
A003237_01	0	2.525	1.13		At1g19380	expressed protein
A003569_01	0	1.164	-0.263		At1g04980	thioredoxin family protein similar to SP|Q63081 Protein disulfide isomerase A6 precursor (EC 5.3.4.1) {Rattus norvegicus}; contains Pfam profile PF00085: Thioredoxin
A003707_01	0	1.555	0.203		At1g02400	gibberellin 2-oxidase, putative / GA2-oxidase, putative similar to GA2ox2 [GI:4678368]; similar to dioxygenase GI:1666096 from [Marah macrocarpus]; contains PF03171 2OG-Fe(II) oxygenase superfamily domain
A003710_01	0	0.978	0.236		At1g69840	band 7 family protein strong similarity to hypersensitive-induced response protein [Zea mays] GI:7716466; contains Pfam profile PF01145: SPFH domain / Band 7 family
A003712_01	0	1.866	0.035		At1g28370	ERF domain protein 11 (ERF11) identical to ERF domain protein 11 (AtERF11) GI:15207789 from [Arabidopsis thaliana]
A003719_01	0	1.452	0.621		At1g67970	heat shock factor protein, putative (HSF5) / heat shock transcription factor, putative (HSTF5) identical to heat shock transcription factor 5 (HSF5) SP:Q9S7U5 from [Arabidopsis thaliana]; contains Pfam profile: PF00447 HSF-type DNA-binding domain
A003890_01	0	1.661	0.4		At1g18570	myb family transcription factor (MYB51) contains PFAM profile: PF00249
A005388_01	0	1.097	-0.031		At4g23190	protein kinase family protein contains Pfam PF00069: Protein kinase domain
A005845_01	0	1.121	0.558		At1g65845	expressed protein [Arabidopsis thaliana]
A005935_01	0	1.266	-0.207		At3g15210	ethylene-responsive element-binding factor 4 (ERF4) identical to ethylene responsive element binding factor 4 SP:O80340 from [Arabidopsis thaliana]
A006345_01	0	1.747	1.288		At2g26440	pectinesterase family protein contains Pfam profile: PF01095 pectinesterase
A006512_01	0	1.309	0.428		At2g37940	expressed protein
A006553_01	0	1.089	0.145		At2g23680	stress-responsive protein, putative similar to cold acclimation WCOR413-like protein gamma form [Hordeum vulgare] gi|18449100|gb|AAL69988; similar to stress-regulated protein SAP1 [Xerophyta viscosa] gi|21360378|gb|AAM47505
A006637_01	0	1.136	0.295		At2g31360	delta 9 desaturase (ADS2) identical to delta 9 acyl-lipid desaturase (ADS2) GI:2970036 from [Arabidopsis thaliana]
A006716_01	0	1.439	0.804		At2g17230	phosphate-responsive 1 family protein similar to phi-1 (phosphate-induced gene) [Nicotiana tabacum] GI:3759184; contains Pfam profile PF04674: Phosphate-induced protein 1 conserved region
A006761_01	0	1.432	0.554		At2g31880	leucine-rich repeat transmembrane protein kinase, putative
A007285_01	0	1.576	0.51		At2g23120	expressed protein
A007341_01	0	1.34	0.505		At2g38290	ammonium transporter 2 (AMT2) identical to SP|Q9M6N7 Ammonium transporter 2 (AtAMT2) {Arabidopsis thaliana}
A007546_01	0	1.473	-0.81		At2g18210	expressed protein
A008165_01	0	1.279	0.301		At2g17290	calcium-dependent protein kinase isoform 6 (CPK6) identical to calmodulin-domain protein kinase CDPK isoform 6 [Arabidopsis thaliana] gi|1399275|gb|AAB03246; contains protein kinase domain, Pfam:PF00069; contains EF hand domain (calcium-binding EF-hand),
A008440_01	0	1.077	0.519		At2g31980	cysteine proteinase inhibitor-related contains similarity to extracellular insoluble cystatin GI:2204077 from [Daucus carota]
A008562_01	0	1.627	-0.253		At2g02990	ribonuclease 1 (RNS1) identical to ribonuclease SP:P42813 Ribonuclease 1 precursor (EC 3.1.27.1) {Arabidopsis thaliana}, GI:561998 from [Arabidopsis thaliana]
A008617_01	0	1.2	0.58		At2g43620	chitinase, putative similar to basic endochitinase CHB4 precursor SP:Q06209 from [Brassica napus]
A008772_01	0	1.658	-0.644		At2g24850	aminotransferase, putative similar to nicotianamine aminotransferase from Hordeum vulgare [GI:6498122, GI:6469087]; contains Pfam profile PF00155 aminotransferase, classes I and II
A008818_01	0	1.702	0.19		At2g41100	touch-responsive protein / calmodulin-related protein 3, touch-induced (TCH3) identical to calmodulin-related protein 3, touch-induced SP:P25071 from [Arabidopsis thaliana]
A008865_01	0	1.038	0.429		At2g41110	calmodulin-2/3/5 (CAM2) (CAL1) almost identical to Calmodulin-2/3/5 SP:P25069 from [Arabidopsis thaliana]
A008906_01	0	1.183	-0.168		At3g46620	zinc finger (C3HC4-type RING finger) family protein contains Pfam domain, PF00097: Zinc finger, C3HC4 type (RING finger)
A009015_01	0	2.116	1.039		At3g25600	calmodulin, putative similar to calmodulin GI:239841 from [Paramecium tetraurelia]
A009179_01	0	1.11	0.655		At3g23110	disease resistance family protein contains leucine rich-repeat (LRR) domains Pfam:PF00560, INTERPRO:IPR001611; similar to Cf-2.2 [Lycopersicon pimpinellifolium] gi|1184077|gb|AAC15780
A009349_01	0	1.747	0.622		At3g25780	allene oxide cyclase, putative / early-responsive to dehydration protein, putative / ERD protein, putative similar to allene oxide cyclase GI:8977961 from [Lycopersicon esculentum]; similar to early-responsive to dehydration (ERD12) protein [GI:15320414];
A009517_01	0	0.824	0.427		At3g51670	SEC14 cytosolic factor family protein / phosphoglyceride transfer family protein similar to polyphosphoinositide binding protein Ssh2p (GI:2739046) {Glycine max};; contains Pfam PF00650 : CRAL/TRIO domain; contains Pfam PF03765 : CRAL/TRIO, N-terminus
A009857_01	0	1.725	0.443		At3g04640	glycine-rich protein predicted proteins, Arabidopsis thaliana
A009901_01	0	0.966	0.236		At3g56710	sigA-binding protein identical to SigA binding protein [Arabidopsis thaliana] gi|6980074|gb|AAF34713; contains Pfam PF05678: VQ motif
A009962_01	0	1.468	-0.225		At3g09870	auxin-responsive family protein similar to auxin-induced proteins (SP:P33083), (SP:P33082) [Glycine max] and indole-3-acetic acid induced protein ARG7 (SP:P32295) from soybean [Vigna radiata]
A009987_01	0	3.329	0.846		At3g02840	immediate-early fungal elicitor family protein similar to immediate-early fungal elicitor protein CMPG1 (GI:14582200) [Petroselinum crispum]
A009989_01	0	1.583	0.05		At3g02800	tyrosine specific protein phosphatase family protein contains tyrosine specific protein phosphatases active site, PROSITE:PS00383
A010112_01	0	2	0.421		At3g29000	calcium-binding EF hand family protein similar to calmodulin-like MSS3 GI:9965747 from [Arabidopsis thaliana]; contains INTERPRO:IPR002048 calcium-binding EF-hand domain
A010214_01	0	2.32	1.118		At3g28340	galactinol synthase, putative
A010373_01	0	2.63	0.711		At3g50930	AAA-type ATPase family protein contains Pfam profile: ATPase family PF00004
A010477_01	0	1.744	0.656		At3g10930	expressed protein
A010589_01	0	1.803	0.258		At3g51660	macrophage migration inhibitory factor family protein / MIF family protein contains Pfam profile: PF01187 Macrophage migration inhibitory factor family(MIF)
A010676_01	0	1.819	0.113		At3g57450	expressed protein
A010702_01	0	1.111	0.594		At3g16050	stress-responsive protein, putative similar to ethylene-inducible protein HEVER [Hevea brasiliensis] SWISS-PROT:Q39963; contains Pfam domain, PF01680: SOR/SNZ family
A011001_01	0	3.185	1.162		At3g23250	myb family transcription factor (MYB15) similar to myb-related transcription factor GB:CAA66952 from [Lycopersicon esculentum]
A011530_01	0	1.616	0.741		At3g11840	U-box domain-containing protein low similarity to immediate-early fungal elicitor protein CMPG1 [Petroselinum crispum] GI:14582200; contains Pfam profile PF04564: U-box domain
A011740_01	0	1.098	0.211		At3g54810	zinc finger (GATA type) family protein GATA transcription factor 3, Arabidopsis thaliana, Y13650
A011768_01	0	1.129	0.186		At3g13560	glycosyl hydrolase family 17 protein similar to beta-1,3-glucanase GI:15150341 from [Camellia sinensis]
A011963_01	0	1.119	0.417		At3g27960	kinesin light chain-related low similarity to kinesin light chain [Plectonema boryanum] GI:2645229; contains Pfam profile PF00515: TPR Domain
A012056_01	0	0.919	0.224		At3g50900	expressed protein
A012336_01	0	1.076	0.393		At3g57550	guanylate kinase 2 (GK-2) identical to guanylate kinase (GK-2) [Arabidopsis thaliana] gi|7861798|gb|AAF70409
A012394_01	0	1.125	0.631		At3g12830	auxin-responsive family protein similar to auxin-induced protein (SP:P33082) [Glycine max]
A012511_01	0	1.189	0.045		At3g52430	phytoalexin-deficient 4 protein (PAD4) identical to phytoalexin-deficient 4 protein [Arabidopsis thaliana] GI:6457331; contains Pfam profile PF01764: Lipase
A012799_01	0	1.823	0.539		At3g61190	BON1-associated protein 1 (BAP1) identical to BON1-associated protein 1 [Arabidopsis thaliana] GI:15487384; contains Pfam profile PF00168: C2 domain; supporting cDNA gi|15487383|gb|AY045765.1|
A012875_01	0	1.771	0.82		At4g11890	protein kinase family protein contains protein kinase domain, Pfam:PF00069
A013080_01	0	1.055	0.054		At4g18200	purine permease family protein similar to purine permease [Arabidopsis thaliana] GI:7620007; contains Pfam profile PF03151: Domain of unknown function, DUF250
A013188_01	0	2.558	1.511		At4g08950	phosphate-responsive protein, putative (EXO) similar to phi-1 (phosphate-induced gene) [Nicotiana tabacum] GI:3759184; contains Pfam profile PF04674: Phosphate-induced protein 1 conserved region
A013324_01	0	1.16	-0.292		At4g36500	expressed protein
A013565_01	0	1.34	0.621		At4g15975	zinc finger (C3HC4-type RING finger) family protein contains Pfam domain, PF00097: Zinc finger, C3HC4 type (RING finger)
A013618_01	0	2.079	0.234		At4g30650	hydrophobic protein, putative / low temperature and salt responsive protein, putative similar to SP|Q9ZNQ7 Hydrophobic protein RCI2A (Low temperature and salt responsive protein LTI6A) {Arabidopsis thaliana}; contains Pfam profile PF01679: Uncharacterized
A013768_01	0	1.377	0.705		At4g23610	expressed protein
A013831_01	0	2.076	0.566		At4g29520	expressed protein
A013839_01	0	1.08	0.685		At4g11000	ankyrin repeat family protein contains ankyrin repeats, Pfam:PF00023
A013888_01	0	1.492	0.532		At4g02550	expressed protein
A014442_01	0	1.132	-0.048		At4g09570	calcium-dependent protein kinase, putative / CDPK, putative similar to calcium-dependent protein kinase [Arabidopsis thaliana] gi|604881|dbj|BAA04830; contains protein kinase domain, Pfam:PF00069; contains EF hand domain (calcium-binding EF-hand), Pfam:PF
A014477_01	0	1.439	0.008		At4g03450	ankyrin repeat family protein contains ankyrin repeats, Pfam domain PF00023
A014702_01	0	1.317	0.154		At4g33050	calmodulin-binding family protein contains Pfam profile PF00612: IQ calmodulin-binding motif
A014945_01	0	1.231	-0.16		At4g14680	sulfate adenylyltransferase 3 / ATP-sulfurylase 3 (APS3) identical to ATP sulfurylase (APS3) [Arabidopsis thaliana] GI:1575327
A015203_01	0	0.96	0.347		At4g16500	cysteine protease inhibitor family protein / cystatin family protein similar to SP|Q06445 Cysteine proteinase inhibitor (Cystatin) {Vigna unguiculata}; contains Pfam profile PF00031: Cystatin domain
A015400_01	0	0.925	0.206		At4g22530	embryo-abundant protein-related similar to embryo-abundant protein [Picea glauca] GI:1350531
A015431_01	0	0.824	0.42		At4g28400	protein phosphatase 2C, putative / PP2C, putative protein phosphatase 2C-fission yeast, PIR2:S54297
A015503_01	0	0.853	0.399		At5g11000	expressed protein
A015569_01	0	1.142	0.515		At5g08150	hypothetical protein hypothetical protein F14K14.2 - Arabidopsis thaliana, EMBL:AC011914
A015872_01	0	1.809	0.017		At5g52740	heavy-metal-associated domain-containing protein contains Pfam profile PF00403: Heavy-metal-associated domain
A015923_01	0	0.976	0.188		At5g24590	turnip crinkle virus-interacting protein / TCV-interacting protein (TIP) contains Pfam PF02365: No apical meristem (NAM) domain; similar to NAC2 (GI:6456751) {Arabidopsis thaliana}; identical to cDNA TIP mRNA, GI:9408600
A015978_01	0	2.026	0.578		At5g05300	expressed protein similar to unknown protein (gb|AAF01528.1); expression supported by MPSS
A016118_01	0	1.578	0.824		At5g60800	heavy-metal-associated domain-containing protein similar to farnesylated protein ATFP3 [GI:4097547]; contains Pfam profile PF00403: Heavy-metal-associated domain
A016442_01	0	1.237	0.515		At5g52310	low-temperature-responsive protein 78 (LTI78) / desiccation-responsive protein 29A (RD29A)
A016463_01	0	0.942	0.36		At5g49480	sodium-inducible calcium-binding protein (ACP1) / sodium-responsive calcium-binding protein (ACP1) identical to NaCl-inducible Ca2+-binding protein GI:2352828 from [Arabidopsis thaliana]
A017144_01	0	1.029	0.158		At5g04020	calmodulin-binding protein-related (PICBP) contains similarity to potato calmodulin-binding protein PCBP GI:17933110 from [Solanum tuberosum]
A017279_01	0	0.93	0.358		At5g13190	expressed protein
A017615_01	0	2.233	1.409		At5g35735	auxin-responsive family protein similar to auxin-induced protein AIR12 GI:11357190 [Arabidopsis thaliana]
A017969_01	0	1.585	-0.162		At5g54490	calcium-binding EF-hand protein, putative similar to EF-hand Ca2+-binding protein CCD1 [Triticum aestivum] GI:9255753; contains INTERPRO:IPR002048 calcium-binding EF-hand domain
A018432_01	0	1.046	0.221		At5g59550	zinc finger (C3HC4-type RING finger) family protein contains Pfam domain, PF00097: Zinc finger, C3HC4 type (RING finger)
A018768_01	0	1.353	0.356		At5g57560	xyloglucan:xyloglucosyl transferase / xyloglucan endotransglycosylase / endo-xyloglucan transferase (TCH4) identical to xyloglucan endotransglycosylase TCH4 protein GI:886116
A018847_01	0	1.028	0.582		At5g14930	leaf senescence-associated protein (SAG101) nearly identical to leaf senescence-associated gene SAG101 (putative acyl hydrolase) [Arabidopsis thaliana] GI:8699168; contains Pfam profile PF01764: Lipase
A018994_01	0	1.176	0.123		At5g67450	zinc finger (C2H2 type) protein 1 (AZF1) identical to Cys2/His2-type zinc finger protein 1 [Arabidopsis thaliana] gi|6009887|dbj|BAA85108
A019034_01	0	1.182	-0.242		At5g47220	ethylene-responsive element-binding factor 2 (ERF2) identical to SP|O80338 Ethylene responsive element binding factor 2 (AtERF2) [Arabidopsis thaliana]
A019243_01	0	1.992	1.222		At5g08240	expressed protein
A019308_01	0	1.309	0.649		At5g11740	arabinogalactan-protein (AGP15) identical to gi|10880507|gb|AAG24283
A019493_01	0	1.07	0.136		At3g54020	phosphatidic acid phosphatase-related / PAP2-related
A019587_01	0	1.073	0.748		At4g09030	arabinogalactan-protein (AGP10) identical to gi|10880497|gb|AAG24278; supported by Ceres cDNA 265772
A019736_01	0	1.222	-0.245		At5g47230	ethylene-responsive element-binding factor 5 (ERF5) identical to SP|O80341 Ethylene responsive element binding factor 5 (AtERF5) [Arabidopsis thaliana]
A019864_01	0	2.318	0.592		At2g32030	GCN5-related N-acetyltransferase (GNAT) family protein contains Pfam profile PF00583: acetyltransferase, GNAT family
A019952_01	0	1.099	0.627		At1g55210	disease resistance response protein-related/ dirigent protein-related smimilar to dirigent protein [Thuja plicata] gi|6694699|gb|AAF25360; similar to pathogenesis-related protein [Pisum sativum] gi|4585273|gb|AAD25355
A020005_01	0	1.908	1.137		At2g17840	senescence/dehydration-associated protein-related (ERD7) similar to senescence-associated protein 12 [Hemerocallis hybrid cultivar] gi|3551958|gb|AAC34857; strong similarity to early-responsive to dehydration stress ERD7 protein [Arabidopsis thaliana] gi|
A020018_01	0	1.985	0.343		At5g39670	calcium-binding EF hand family protein contains INTERPRO:IPR002048 calcium-binding EF-hand domain
A020021_01	0	1.437	0.264		At3g55840	expressed protein
A020064_01	0	1.748	0.001		At4g24570	mitochondrial substrate carrier family protein contains Pfam profile: PF00153 mitochondrial carrier protein
A020251_01	0	1.3	0.363		At5g61900	copine BONZAI1 (BON1) nearly identical to BONZAI1 [Arabidopsis thaliana] GI:15487382; contains Pfam profile PF00168: C2 domain
A020314_01	0	1.213	0.792		At2g28190	superoxide dismutase [Cu-Zn], chloroplast (SODCP) / copper/zinc superoxide dismutase (CSD2) identical to GP:3273753:AF061519
A020695_01	0	1.295	-0.009		At4g27280	calcium-binding EF hand family protein similar to EF-hand Ca2+-binding protein CCD1 [Triticum aestivum] GI:9255753; contains INTERPRO:IPR002048 calcium-binding EF-hand domain
A021060_01	0	2.271	0.444		At4g14365	zinc finger (C3HC4-type RING finger) family protein / ankyrin repeat family protein contains Pfam profile: PF00097 zinc finger, C3HC4 type (RING finger) and Pfam profile: PF00023 ankyrin repeat
A021129_01	0	1.101	0.487		At1g59870	ABC transporter family protein similar to PDR5-like ABC transporter GI:1514643 from [Spirodela polyrhiza]
A021488_01	0	2.237	0.358		At5g52760	heavy-metal-associated domain-containing protein contains Pfam profile PF00403: Heavy-metal-associated domain
A021564_01	0	1.303	0.391		At1g59860	17.6 kDa class I heat shock protein (HSP17.6A-CI) similar to 17.5 kDa class I heat shock protein SP:P04793 from [Glycine max]
A021968_01	0	1.105	0.734		At3g53990	universal stress protein (USP) family protein contains Pfam PF00582: universal stress protein family
A022120_01	0	1.269	0.681		At3g08720	serine/threonine protein kinase (PK19) identical to serine/threonine-protein kinase AtPK19 (Ribosomal-protein S6 kinase homolog) [Arabidopsis thaliana] SWISS-PROT:Q39030
A022121_01	0	1.113	0.411		At5g04870	calcium-dependent protein kinase isoform AK1 (AK1) identical to calcium-dependent protein kinase, isoform AK1 (CDPK) [Arabidopsis thaliana] SWISS-PROT:Q06850; contains protein kinase domain, Pfam:PF00069; contains EF hand domain (calcium-binding EF-hand),
A022269_01	0	1.005	0.603		At5g10380	zinc finger (C3HC4-type RING finger) family protein contains Pfam profile: PF00097 zinc finger, C3HC4 type (RING finger)
A022640_01	0	1.867	0.426		At5g01540	lectin protein kinase, putative similar to receptor lectin kinase 3 [Arabidopsis thaliana] gi|4100060|gb|AAD00733; contains protein kinase domain, Pfam:PF00069; contains legume lectins alpha and beta domains, Pfam:PF00138 and Pfam:PF00139
A023758_01	0	1.57	0.048		At1g20510	4-coumarate--CoA ligase family protein / 4-coumaroyl-CoA synthase family protein similar to SP|P14912 and SP|P14913 from Petroselinum crispum; contains Pfam AMP-binding enzyme domain PF00501
A024141_01	0	1.94	1.481		At2g32680	disease resistance family protein contains leucine rich-repeat (LRR) domains Pfam:PF00560, INTERPRO:IPR001611; similar to Cf-2.2 [Lycopersicon pimpinellifolium] gi|1184077|gb|AAC15780
A024249_01	0	1.231	-0.318		At2g40140	zinc finger (CCCH-type) family protein contains Pfam domain, PF00642: Zinc finger C-x8-C-x5-C-x3-H type (and similar) and Pfam domain, PF00023: Ankyrin repeat
A024265_01	0	1.207	0.472		At4g31000	calmodulin-binding protein similar to calmodulin-binding protein TCB60 GI:1698548 from [Nicotiana tabacum]; contains non-consensus donor splice site AT at exon 4; supported by cDNA gi:17065559
A024277_01	0	1.443	0.185		At2g42540	cold-responsive protein / cold-regulated protein (cor15a) identical to cold-regulated protein cor15a [Arabidopsis thaliana] GI:507149; contains Pfam profile PF02987: Late embryogenesis abundant protein
A024292_01	0	1.317	0.886		At1g08930	early-responsive to dehydration stress protein (ERD6) / sugar transporter family protein identical to ERD6 protein {Arabidopsis thaliana} GI:3123712; contains Pfam profile PF00083: major facilitator superfamily protein; contains TIGRfam TIGR00879: Sugar t
A024407_01	0	1.239	-0.358		At2g23170	auxin-responsive GH3 family protein similar to auxin-responsive GH3 product [Glycine max] GI:18591; contains Pfam profile PF03321: GH3 auxin-responsive promoter
A024419_01	0	1.393	0.403		At1g07000	exocyst subunit EXO70 family protein similar to leucine zipper protein GI:10177020 from [Arabidopsis thaliana] contains Pfam domain PF03081: Exo70 exocyst complex subunit;
A024469_01	0	1.983	1.09		At5g59820	zinc finger (C2H2 type) family protein (ZAT12) identical to zinc finger protein ZAT12 [Arabidopsis thaliana] gi|1418325|emb|CAA67232
A024557_01	0	2.646	0.272		At1g27730	zinc finger (C2H2 type) family protein (ZAT10) / salt-tolerance zinc finger protein (STZ) identical to salt-tolerance zinc finger protein GB:CAA64820 GI:1565227 from [Arabidopsis thaliana]; contains Pfam domain, PF00096: Zinc finger, C2H2 type; identical
A024560_01	0	1.337	-0.106		At5g61600	ethylene-responsive element-binding family protein contains similarity to ethylene responsive element binding factor 5 (AtERF5) (Swiss-Prot:O80341) [Arabidopsis thaliana]; contains Pfam PF00847: AP2 domain
A024633_01	0	1.127	0.035		At1g66180	aspartyl protease family protein contains Pfam PF00026: Eukaryotic aspartyl protease profile; similar to CND41, chloroplast nucleoid DNA binding protein (GI:2541876) [Nicotiana tabacum]
A024638_01	0	1.222	0.647		At1g08450	calreticulin 3 (CRT3) identical to similar to SP|O04153 Calreticulin 3 precursor {Arabidopsis thaliana}
A024663_01	0	1.081	0.551		At1g14370	protein kinase (APK2a) identical to protein kinase APK2a GI:2852447 from [Arabidopsis thaliana]
A025942_01	0	0.98	0.427		At3g52180	protein tyrosine phosphatase/kinase interaction sequence protein (PTPKIS1) identical to PTPKIS1 protein [Arabidopsis thaliana] GI:11595504; contains Pfam profile PF00782: Dual specificity phosphatase, catalytic domain
A200045_01	0	1.842	-0.252		At2g24600	ankyrin repeat family protein contains ankyrin repeats, Pfam:PF00023
A200254_01	0	1.779	0.893		At1g05575	expressed protein
A200329_01	0	2.075	1.085		At1g09932	phosphoglycerate/bisphosphoglycerate mutase-related weak hit to Pfam profile PF00300: phosphoglycerate mutase family
A200450_01	0	2.735	0.899		At1g19020	expressed protein
A200552_01	0	1.284	0.425		At1g27330	expressed protein similar to EST gb|AA650671 and gb|T20610
A200816_01	0	1.003	0.242		At1g53440	leucine-rich repeat family protein / protein kinase family protein contains Pfam domains PF00560: Leucine Rich Repeat and PF00069: Protein kinase domain
A200904_01	0	2.257	-0.412		At1g61563	rapid alkalinization factor (RALF) family protein contains Pfam domain PF05498: Rapid ALkalinization Factor (RALF)
A200905_01	0	1.937	-0.258		At1g61566	rapid alkalinization factor (RALF) family protein contains Pfam domain PF05498: Rapid ALkalinization Factor (RALF)
A200906_01	0	1.535	1.045		At1g61667	expressed protein contains Pfam profile PF04398: Protein of unknown function, DUF538
A200986_01	0	2.16	0.246		At1g68765	expressed protein
A201041_01	0	1.978	1.298		At1g76040	calcium-dependent protein kinase, putative / CDPK, putative similar to calcium-dependent protein kinase GB:AAC25423 GI:3283996 [Nicotiana tabacum]
A201371_01	0	0.992	0.36		At2g25735	expressed protein
A201517_01	0	1.367	-0.388		At2g41835	zinc finger (C2H2 type, AN1-like) family protein contains Pfam domain, PF00096: Zinc finger, C2H2 type; contains Pfam domain, PF01428: AN1-like Zinc finger
A201621_01	0	1.58	0.603		At3g11010	disease resistance family protein / LRR family protein contains leucine rich-repeat domains Pfam:PF00560, INTERPRO:IPR001611; similar to disease resistance protein [Lycopersicon esculentum] gi|3894383|gb|AAC78591
A201667_01	0	2.038	-0.189		At3g15356	legume lectin family protein contains Pfam domain, PF00139: Legume lectins beta domain
A202189_01	0	2.474	0.047		At4g08555	expressed protein
A202192_01	0	1.165	0.247		At4g08850	leucine-rich repeat family protein / protein kinase family protein contains Pfam domains PF00560: Leucine Rich Repeat and PF00069: Protein kinase domain
A202399_01	0	1.446	0.61		At4g23810	WRKY family transcription factor AR411 - Arabidopsis thaliana (thale cress), PID:g1669603
A202758_01	0	0.969	0.34		At5g20480	leucine-rich repeat transmembrane protein kinase, putative protein kinase Xa21, Oryza sativa, PIR:A57676
A202856_01	0	1.705	0.551		At5g25250	expressed protein
A202873_01	0	0.926	0.526		At5g25440	protein kinase family protein contains protein kinase domain, Pfam:PF00069
A202952_01	0	1.933	0.402		At5g27420	zinc finger (C3HC4-type RING finger) family protein similar to RING-H2 zinc finger protein ATL6 [Arabidopsis thaliana] gi|4928403|gb|AAD33584.1|AF132016_1[4928403]; contains Pfam domain, PF00097: Zinc finger, C3HC4 type (RING finger)
A203034_01	0	1.303	0.434		At5g28630	glycine-rich protein
A203278_01	0	2.819	0.644		At5g46295	expressed protein
A203330_01	0	1.676	-0.351		At5g54710	ankyrin repeat family protein contains ankyrin repeat domains, Pfam:PF00023
At30000061	0	1.925	0.385		At1g01560	mitogen-activated protein kinase, putative / MAPK, putative (MPK11) similar to MAP kinase 5 GI:4239889 from [Zea mays]; mitogen-activated protein kinase (MAPK)(AtMPK11), PMID:12119167
At30001049	0	1.581	0.763		At1g09970	leucine-rich repeat transmembrane protein kinase, putative Similar to A. thaliana receptor-like protein kinase (gb|RLK5_ARATH). ESTs gb|ATTS0475,gb|ATTS4362 come from this gene isoform contains a TG acceptor site at intron.
At30001050	0	1.607	0.842		At1g09970	leucine-rich repeat transmembrane protein kinase, putative Similar to A. thaliana receptor-like protein kinase (gb|RLK5_ARATH). ESTs gb|ATTS0475,gb|ATTS4362 come from this gene isoform contains a TG acceptor site at intron.
At30001051	0	1.606	0.612		At1g09970	leucine-rich repeat transmembrane protein kinase, putative Similar to A. thaliana receptor-like protein kinase (gb|RLK5_ARATH). ESTs gb|ATTS0475,gb|ATTS4362 come from this gene isoform contains a TG acceptor site at intron.
At30002214	0	1.133	-0.111		At1g20510	4-coumarate--CoA ligase family protein / 4-coumaroyl-CoA synthase family protein similar to SP|P14912 and SP|P14913 from Petroselinum crispum; contains Pfam AMP-binding enzyme domain PF00501
At30002283	0	1.407	0.221		At1g21130	O-methyltransferase, putative similar to GI:2781394
At30002628	0	1.461	0.407		At1g24150	formin homology 2 domain-containing protein / FH2 domain-containing protein contains formin homology 2 domain, Pfam:PF02181
At30002690	0	1.041	0.389		At1g24909	anthranilate synthase beta subunit, putative strong similarity to anthranilate synthase beta subunit GI:403434 from (Arabidopsis thaliana)
At30003706	0	3.403	1.049		At1g35920	hypothetical protein includes At5g34960, At2g14450, At1g35920
At30004389	0	1.052	0.386		At1g51280	disease resistance protein (TIR class), putative domain signature TIR exists, suggestive of a disease resistance protein.
At30004965	0	3.561	0.657		At1g56240	SKP1 interacting partner 3-related contains similarity to SKP1 interacting partner 3 GI:10716951 from [Arabidopsis thaliana]
At30005050	0	1.957	1.008		At1g57990	purine permease-related low similarity to purine permease [Arabidopsis thaliana] GI:7620007; contains Pfam profile PF03151: Domain of unknown function, DUF250
At30005324	0	2.876	0.756		At1g61470	CCR4-NOT transcription complex protein, putative similar to SWISS-PROT:Q60809 CCR4-NOT transcription complex, subunit 7 (CCR4-associated factor 1, (CAF1) [Mus musculus]
At30005758	0	1.773	-0.48		At1g65390	disease resistance protein (TIR class), putative domain signature TIR exists, suggestive of a disease resistance protein.
At30006472	0	1.174	0.647		At1g71880	sucrose transporter / sucrose-proton symporter (SUC1) identical to sucrose-proton symporter SUC1 [Arabidopsis thaliana] GI:407094
At30006581	0	1.537	-0.408		At1g72900	disease resistance protein (TIR-NBS class), putative domain signature TIR-NBS exists, suggestive of a disease resistance protein.
At30006586	0	1.111	-0.182		At1g72950	disease resistance protein (TIR-NBS class), putative domain signature TIR-NBS exists, suggestive of a disease resistance protein.
At30007470	0	1.833	-0.386		At1g80840	WRKY family transcription factor similar to WRKY transcription factor GB:BAA87058 GI:6472585 from [Nicotiana tabacum]
At30007843	0	2.328	0.567		At2g04495	expressed protein
At30008877	0	1.468	0.32		At2g20145	Toll-Interleukin-Resistance (TIR) domain-containing protein domain signature TIR exists, suggestive of a disease resistance protein.
At30008878	0	1.37	-0.092		At2g20142	expressed protein
At30009144	0	2.363	0.435		At2g22500	mitochondrial substrate carrier family protein contains Pfam profile: PF00153 mitochondrial carrier protein
At30009369	0	1.232	0.276		At2g24600	ankyrin repeat family protein contains ankyrin repeats, Pfam:PF00023
At30009371	0	1.668	-0.127		At2g24600	ankyrin repeat family protein contains ankyrin repeats, Pfam:PF00023
At30010210	0	1.259	-0.434		At2g32130	expressed protein contains Pfam domain, PF04859: Plant protein of unknown function (DUF641)
At30010511	0	1.669	0.214		At2g34650	protein kinase PINOID (PID) identical to protein kinase PINOID [Arabidopsis thaliana] gi|7208442|gb|AAF40202; contains protein kinase domain, Pfam:PF00069
At30011268	0	1.772	0.97		At2g41100	touch-responsive protein / calmodulin-related protein 3, touch-induced (TCH3) identical to calmodulin-related protein 3, touch-induced SP:P25071 from [Arabidopsis thaliana]
At30011363	0	1.003	0.128		At2g41905	expressed protein
At30011440	0	1.112	0.126		At2g42540	cold-responsive protein / cold-regulated protein (cor15a) identical to cold-regulated protein cor15a [Arabidopsis thaliana] GI:507149; contains Pfam profile PF02987: Late embryogenesis abundant protein
At30011878	0	1.485	0.072		At2g46400	WRKY family transcription factor
At30012466	0	1.14	-0.004		At3g04210	disease resistance protein (TIR-NBS class), putative domain signature TIR-NBS exists, suggestive of a disease resistance protein.
At30013042	0	0.968	0.48		At3g09440	heat shock cognate 70 kDa protein 3 (HSC70-3) (HSP70-3) identical to SP|O65719 Heat shock cognate 70 kDa protein 3 (Hsc70.3) {Arabidopsis thaliana}
At30013138	0	1.286	0.736		At3g10300	calcium-binding EF hand family protein low similarity to SP|P12815 Programmed cell death protein 6 (Probable calcium-binding protein ALG-2) {Mus musculus}; contains INTERPRO:IPR002048 calcium-binding EF-hand domain
At30013486	0	1.234	0.308		At3g13080	ABC transporter family protein almost identical to MRP-like ABC transporter GI:2316016 from [Arabidopsis thaliana]; contains Pfam profile: PF00005 ABC transporter
At30013487	0	1.176	0.135		At3g13080	ABC transporter family protein almost identical to MRP-like ABC transporter GI:2316016 from [Arabidopsis thaliana]; contains Pfam profile: PF00005 ABC transporter
At30014381	0	1.536	0.342		At3g20600	non-race specific disease resistance protein (NDR1) identical to non-race specific disease resistance protein (NDR1) GB:AF021346 [Arabidopsis thaliana] (Science 278 (5345), 1963-1965 (1997))
At30015730	0	1.532	-0.152		At3g44260	CCR4-NOT transcription complex protein, putative similar to SWISS-PROT:Q9UFF9 CCR4-NOT transcription complex, subunit 8 (CAF1-like protein, CALIFp) [Homo sapiens]
At30015765	0	1.05	-0.05		At3g44630	disease resistance protein RPP1-WsB-like (TIR-NBS-LRR class), putative domain signature TIR-NBS-LRR exists, suggestive of a disease resistance protein., closest Col-0 homolog to RPP1-WsB
At30015775	0	1.344	0.042		At3g44720	prephenate dehydratase family protein similar to bacterial PheA gene products
At30016797	0	0.956	0.334		At3g53990	universal stress protein (USP) family protein contains Pfam PF00582: universal stress protein family
At30016798	0	0.899	0.321		At3g53990	universal stress protein (USP) family protein contains Pfam PF00582: universal stress protein family
At30017104	0	1.436	0.621		At3g56800	calmodulin-2/3/5 (CAM3) identical to calmodulin GI:474183 from [Arabidopsis thaliana]; almost identical to calmodulin-2/3/5 SP:P25069 [Arabidopsis thaliana]
At30018122	0	0.902	0.503		At4g02130	glycosyl transferase family 8 protein low similarity to lgtC of Neisseria sp., GenBank accession number U14554, U65788; contains Pfam glycosyl transferase family 8 domain PF01501
At30018170	0	1.412	0.71		At4g02550	expressed protein
At30020094	0	1.015	0.502		At4g21570	expressed protein contains Pfam profile PF03619: Domain of unknown function
At30020124	0	0.932	0.288		At4g21850	methionine sulfoxide reductase domain-containing protein / SeIR domain-containing protein low similarity to pilin-like transcription factor [Homo sapiens] GI:5059062, SP|P14930 Peptide methionine sulfoxide reductase msrA/msrB (EC 1.8.4.6) {Neisseria gonor
At30020276	0	2.124	1.48		At4g23150	protein kinase family protein contains Pfam domain, PF00069: Protein kinase domain
At30021110	0	2.201	0.441		At4g30280	xyloglucan:xyloglucosyl transferase, putative / xyloglucan endotransglycosylase, putative / endo-xyloglucan transferase, putative similar to xyloglucan endotransglycosylase TCH4 GI:886116 from [Arabidopsis thaliana]
At30021474	0	0.95	0.195		At4g33300	disease resistance protein (CC-NBS-LRR class), putative domain signature CC-NBS-LRR exists, suggestive of a disease resistance protein.
At30025498	0	1.824	-0.24		At5g36925	expressed protein
At30026012	0	1.227	-0.062		At5g41740	disease resistance protein (TIR-NBS-LRR class), putative domain signature TIR-NBS-LRR exists, suggestive of a disease resistance protein.
At30027099	0	1.748	-0.501		At5g51190	AP2 domain-containing transcription factor, putative contains similarity to ethylene responsive element binding factor
At30027639	0	0.884	0.278		At5g56000	heat shock protein 81-4 (HSP81-4) nearly identical to heat shock protein hsp81.4 [Arabidopsis thaliana] GI:1906828; contains Pfam profiles PF02518: ATPase, histidine kinase-, DNA gyrase B-, and HSP90-like domain protein, PF00183: Hsp90 protein
At30027640	0	0.904	0.435		At5g56010	heat shock protein, putative strong similarity to SP|P55737 Heat shock protein 81-2 (HSP81-2) {Arabidopsis thaliana}; contains Pfam profiles PF02518: ATPase, histidine kinase-, DNA gyrase B-, and HSP90-like domain protein, PF00183: Hsp90 protein
At30027642	0	0.974	0.401		At5g56030	heat shock protein 81-2 (HSP81-2) nearly identical to SP|P55737 Heat shock protein 81-2 (HSP81-2) {Arabidopsis thaliana}
At30028556	0	1.047	0.575		At5g64000	3'(2'),5'-bisphosphate nucleotidase, putative / inositol polyphosphate 1-phosphatase, putative similar to SP|Q42546 3'(2'),5'-bisphosphate nucleotidase (EC 3.1.3.7) {Arabidopsis thaliana}; contains Pfam profile PF00459: Inositol monophosphatase family
At30028832	0	1.202	-0.366		At5g66210	calcium-dependent protein kinase family protein / CDPK family protein contains Pfam domains, PF00069: Protein kinase domain and PF00036: EF hand
At30028884	0	1.595	0.469		At5g66640	LIM domain-containing protein-related contains low similarity to Pfam profile PF00412: LIM domain
A006536_01	0	1.45	0.405		At2g41330	glutaredoxin family protein contains Pfam profile PF00462: Glutaredoxin
A011896_01	0	1.532	0.194		At3g07820	polygalacturonase 3 (PGA3) / pectinase identical to polygalacturonase [Arabidopsis thaliana] GI:3152948
A013157_01	0	1.709	0.357		At4g38560	expressed protein
A015980_01	0	1.447	0.508		At5g05340	peroxidase, putative similar to peroxidase [Nicotiana tabacum] gi|5381253|dbj|BAA82306; similar to Peroxidase P7 [Brassica rapa (Turnip)] SWISS-PROT:P00434
A016190_01	0	3.15	0.915		At5g42380	calmodulin-related protein, putative similar to regulator of gene silencing calmodulin-related protein GI:12963415 from [Nicotiana tabacum]
A203404_01	0	1.951	1.126		At5g64120	peroxidase, putative identical to peroxidase [Arabidopsis thaliana] gi|1483222|emb|CAA67551
At30017511	0	1.801	0.63		At3g60540	sec61beta family protein similar to SP|P52870 Protein transport protein SEC61 beta 1 subunit {Saccharomyces cerevisiae}; contains Pfam profile PF03911: Sec61beta family

## Sheet: SOM3 Down
Oligo ID	Mock	TEV	TEV-At		Gene	Annotation
A000029_01	0	-0.404	-1.297		At1g78580	alpha, alpha-trehalose-phosphate synthase, UDP-forming, putative / trehalose-6-phosphate synthase, putative / UDP-glucose-glucosephosphate glucosyltransferase, putative similar to trehalose-6-phosphate synthase SL-TPS/P [Selaginella lepidophylla] GI:41003
A000031_01	0	-0.6	-1.421		At1g19670	coronatine-responsive protein / coronatine-induced protein 1 (CORI1) identical to coronatine-induced protein 1 (CORI1) GI:30912637 from [Arabidopsis thaliana]
A000790_01	0	-1.219	-2.55		At1g68600	expressed protein contains Pfam profile PF01027: Uncharacterized protein family UPF0005
A000809_01	0	-0.433	-0.979		At1g74890	two-component responsive regulator / response regulator 15 (ARR15) identical to response regulator 15 GI:11870065 from [Arabidopsis thaliana]; contains Pfam profile: PF00072 response regulator receiver domain
A000909_01	0	-0.599	-1.105		At1g11410	S-locus protein kinase, putative similar to receptor-like protein kinase [Arabidopsis thaliana] gi|4008008|gb|AAC95352; contains S-locus glycoprotein family domain, Pfam:PF00954
A001091_01	0	-0.596	-0.851		At1g64680	expressed protein
A001115_01	0	-0.644	-1.53		At1g32100	pinoresinol-lariciresinol reductase, putative similar to pinoresinol-lariciresinol reductase TH1 [Tsuga heterophylla][GI:7578915]; contains isoflavone reductase domain PF02716
A001168_01	0	-0.633	-1.002		At1g20160	subtilase family protein similar to subtilisin-type protease precursor GI:14150446 from [Glycine max]
A001367_01	0	-0.472	-1.225		At1g49730	protein kinase family protein contains Pfam PF00069: Protein kinase domain; similar to AtPK2324 (GI:1785621) [Arabidopsis thaliana]; similar to receptor-like protein kinase (GI:1644291) [Catharanthus roseus]; similar to somatic embryogenesis receptor-like
A001435_01	0	-0.958	-1.316		At1g62510	protease inhibitor/seed storage/lipid transfer protein (LTP) family protein contains Pfam protease inhibitor/seed storage/LTP family domain PF00234
A001445_01	0	-0.856	-1.224		At1g09340	expressed protein
A001913_01	0	-1.44	-1.731		At1g55020	lipoxygenase (LOX1) identical to SP|Q06327
A001936_01	0	-0.327	-1.048		At1g20850	cysteine endopeptidase, papain-type (XCP2) identical to papain-type cysteine endopeptidase XCP2 GI:6708183 from [Arabidopsis thaliana]
A001937_01	0	-0.846	-1.445		At1g22160	senescence-associated protein-related similar to senescence-associated protein SAG102 (GI:22331931) [Arabidopsis thaliana]
A001939_01	0	-1.039	-2.043		At1g10370	glutathione S-transferase, putative (ERD9) similar to glutathione S-transferase TSI-1 [Aegilops tauschii] gi:2190992 gb:AAD10129; similar to ESTs gb|R29860, emb|Z29757, and emb|Z29758; identical to cDNA ERD9 mRNA for glutathione S-transferase, GI:15375407
A002069_01	0	-0.858	-1.114		At1g47210	cyclin family protein similar to A-type cyclin [Catharanthus roseus] GI:2190259; contains Pfam profile PF00134: Cyclin, N-terminal domain
A002712_01	0	-0.56	-0.951		At1g32220	expressed protein
A002806_01	0	-0.651	-1.093		At1g35550	elongation factor Tu C-terminal domain-containing protein similar to SP|P13905 Elongation factor 1-alpha (EF-1-alpha) {Arabidopsis thaliana}; contains Pfam profile PF03143: Elongation factor Tu C-terminal domain
A002988_01	0	-1.619	-2.332		At1g04220	beta-ketoacyl-CoA synthase, putative Strong similarity to beta-keto-Coa synthase gb|U37088 from Simmondsia chinensis, GI:4091810
A003034_01	0	-0.817	-1.895		At1g21980	1-phosphatidylinositol-4-phosphate 5-kinase, putative / PIP kinase, putative / PtdIns(4)P-5-kinase, putative / diphosphoinositide kinase, putative strong similarity to phosphatidylinositol-4-phosphate 5-kinase AtPIP5K1 [Arabidopsis thaliana] GI:3702691; c
A003055_01	0	-0.819	-1.322		At1g18060	expressed protein
A003185_01	0	-0.334	-1.444		At1g34575	FAD-binding domain-containing protein similar to SP|P30986 reticuline oxidase precursor (Berberine-bridge-forming enzyme) (BBE) (Tetrahydroprotoberberine synthase) [Eschscholzia californica]; contains PF01565 FAD binding domain
A003641_01	0	-0.553	-1.246		At1g18730	expressed protein
A003736_01	0	-0.313	-1.274		At1g68230	reticulon family protein (RTNLB14) contains Pfam profile PF02453: Reticulon
A003844_01	0	-1.171	-2.285		At1g52040	jacalin lectin family protein nearly identical to myrosinase-binding protein homolog GI:2997767 from [Arabidopsis thaliana]; contains Pfam profile PF01419 jacalin-like lectin domain; identical to cDNA myrosinase-binding protein homolog GI:2997766
A004054_01	0	-0.698	-1.248		At1g26210	expressed protein similar to hypothetical protein GI:6524175 from [Arabidopsis thaliana]
A004107_01	0	-0.458	-1.118		At1g26560	glycosyl hydrolase family 1 protein contains Pfam PF00232 : Glycosyl hydrolase family 1 domain; TIGRFAM TIGR01233: 6-phospho-beta-galactosidase; similar to amygdalin hydrolase isoform AH I precursor (GI:16757966) [Prunus serotina]
A004359_01	0	-0.341	-1.066		At1g49780	U-box domain-containing protein similar to immediate-early fungal elicitor protein CMPG1 [Petroselinum crispum] GI:14582200; contains Pfam profile PF04564: U-box domain
A004483_01	0	-1.001	-1.217		At1g32080	membrane protein, putative contains 12 transmembrane domains; similar to yohK (GI:405873) [Escherichia coli]
A004579_01	0	-0.492	-1.029		At1g75250	myb family transcription factor contains PFAM profile: PF00249 myb-like DNA binding domain
A004594_01	0	-0.725	-0.962		At1g70230	expressed protein
A004783_01	0	-0.946	-1.317		At1g04800	glycine-rich protein
A004994_01	0	-0.43	-0.987		At1g08510	acyl-[acyl carrier protein] thioesterase / acyl-ACP thioesterase / oleoyl-[acyl-carrier protein] hydrolase / S-acyl fatty acid synthase thioesterase identical to acyl-(acyl carrier protein) thioesterase [Arabidopsis thaliana] GI:804948
A005145_01	0	-0.71	-1.079		At1g77490	L-ascorbate peroxidase, thylakoid-bound (tAPX) identical to thylakoid-bound ascorbate peroxidase GB:CAA67426 [Arabidopsis thaliana]
A005338_01	0	-0.531	-1.232		At5g19530	spermine/spermidine synthase family protein similar to SP|P09158 Spermidine synthase (EC 2.5.1.16) (Putrescine aminopropyltransferase) {Escherichia coli}; contains Pfam profile PF01564: Spermine/spermidine synthase
A005576_01	0	-0.49	-1		At1g75710	zinc finger (C2H2 type) family protein contains zinc finger, C2H2 type, domain, PROSITE:PS00028
A005910_01	0	-1.141	-2.152		At1g58520	early-responsive to dehydration protein-related / ERD protein-related low similarity to ERD4 protein (early-responsive to dehydration stress) [Arabidopsis thaliana] GI:15375406; contains Pfam profile PF02714: Domain of unknown function DUF221
A006169_01	0	-0.57	-0.863		At2g24270	NADP-dependent glyceraldehyde-3-phosphate dehydrogenase, putative similar to NADP-dependent glyceraldehyde-3-phosphate dehydrogenase (NON-phosphorylating glyceraldehyde 3-phosphate; glyceraldehyde-3-phosphate dehydrogenase [NADP+]) [Nicotiana plumbaginifo
A006218_01	0	-1.631	-1.962		At2g15020	expressed protein and genefinder
A006456_01	0	-0.617	-1.255		At2g30540	glutaredoxin family protein contains INTERPRO Domain IPR002109, Glutaredoxin (thioltransferase)
A006779_01	0	-0.313	-1.059		At2g01950	leucine-rich repeat transmembrane protein kinase, putative similar to brassinosteroid insensitive protein
A006847_01	0	-0.945	-1.627		At2g29980	omega-3 fatty acid desaturase, endoplasmic reticulum (FAD3) identical to SP:48623
A007154_01	0	-0.387	-1.612		At2g04570	GDSL-motif lipase/hydrolase family protein similar to family II lipase EXL3 (GI:15054386), EXL1 (GI:15054382), EXL2 (GI:15054384) [Arabidopsis thaliana]; contains Pfam profile PF00657: Lipase/Acylhydrolase with GDSL-like motif
A007159_01	0	-0.579	-1.284		At2g04780	fasciclin-like arabinogalactan-protein (FLA7) identical to gi_13377782_gb_AAK20860
A007305_01	0	-0.388	-1.042		At2g28950	expansin, putative (EXP6) similar to expansin GI:2828241 from [Brassica napus]; contains Pfam profile PF01357: Pollen allergen
A007385_01	0	-0.425	-1.087		At2g40460	proton-dependent oligopeptide transport (POT) family protein contains Pfam profile: PF00854 POT family
A007925_01	0	-0.694	-0.951		At2g46250	myosin heavy chain-related contains weak similarity to Myosin heavy chain, muscle (Swiss-Prot:P05661) [Drosophila melanogaster]
A008871_01	0	-0.896	-1.083		At3g49260	calmodulin-binding family protein low similarity to SF16 protein [Helianthus annuus] GI:560150; contains Pfam profile PF00612: IQ calmodulin-binding motif
A008951_01	0	-0.226	-1.344		At3g45160	expressed protein
A009007_01	0	-0.98	-1.407		At3g10840	hydrolase, alpha/beta fold family protein low similarity to hydrolase [Terrabacter sp. DBF63] GI:14196240; contains Pfam profile: PF00561 alpha/beta hydrolase fold
A009187_01	0	-0.848	-1.829		At3g28270	expressed protein similar to At14a protein (GI:11994571 and GI:11994573) [Arabidopsis thaliana]
A009524_01	0	-1.246	-1.446		At3g11210	GDSL-motif lipase/hydrolase family protein contains Pfam profile PF00657: Lipase/Acylhydrolase with GDSL-like motif
A009660_01	0	-0.473	-0.915		At3g11490	rac GTPase activating protein, putative similar to rac GTPase activating protein 1 GB:AAC62624 GI:3695059 [Lotus japonicus]; contains Pfam profile PF00620: RhoGAP domain
A009937_01	0	-0.735	-1.349		At3g48460	GDSL-motif lipase/hydrolase family protein similar to lipase [Arabidopsis thaliana] GI:1145627; contains InterPro Entry IPR001087 Lipolytic enzyme, G-D-S-L family
A010137_01	0	-0.721	-1.318		At3g05890	hydrophobic protein (RCI2B) / low temperature and salt responsive protein (LTI6B) identical to SP|Q9ZNS6 Hydrophobic protein RCI2B (Low temperature and salt responsive protein LTI6B) {Arabidopsis thaliana}
A010461_01	0	-0.467	-1.346		At3g01670	expressed protein
A010483_01	0	-0.635	-1.535		At3g01960	expressed protein
A010503_01	0	-0.657	-1.03		At3g10080	germin-like protein, putative similar to germin-like protein 2 [Oryza sativa] GI:2655287
A010541_01	0	-0.475	-0.953		At3g17070	peroxidase, putative similar to peroxidase GB:AAD37376 [Glycine max]
A010689_01	0	-0.593	-1.103		At3g49670	leucine-rich repeat transmembrane protein kinase, putative CLAVATA1 receptor kinase, Arabidopsis thaliana, EMBL:ATU96879
A011208_01	0	-0.392	-1		At3g12920	expressed protein
A011372_01	0	-0.725	-1.226		At3g52750	chloroplast division protein, putative strong similarity to plastid division protein FtsZ [Arabidopsis thaliana] GI:14195704, chloroplast division protein AtFtsZ2-1 [Arabidopsis thaliana] GI:15636809
A011450_01	0	-0.56	-1.425		At3g01680	expressed protein
A011472_01	0	-0.665	-1.003		At3g10060	immunophilin, putative / FKBP-type peptidyl-prolyl cis-trans isomerase, putative Pfam:PF-254: FKBP-type peptidyl-prolyl cis-trans isomerases
A012200_01	0	-0.457	-1.309		At3g10940	protein phosphatase-related similar to protein phosphatase PTPKIS1 protein (GI:11595504) [Arabidopsis thaliana]
A012236_01	0	-0.972	-1.388		At3g01550	triose phosphate/phosphate translocator, putative similar to SWISS-PROT:P52178 triose phosphate/phosphate translocator [Cauliflower]{Brassica oleracea}
A012312_01	0	-0.546	-1.118		At3g08600	expressed protein
A012676_01	0	-0.434	-1.267		At3g43720	protease inhibitor/seed storage/lipid transfer protein (LTP) family protein contains Pfam protease inhibitor/seed storage/LTP family domain PF00234
A012778_01	0	-1.259	-1.947		At3g53260	phenylalanine ammonia-lyase 2 (PAL2) nearly identical to SP|P45724
A012916_01	0	-1.061	-1.672		At4g28780	GDSL-motif lipase/hydrolase family protein similar to family II lipase EXL3 (GI:15054386), EXL1 (GI:15054382), EXL2 (GI:15054384) [Arabidopsis thaliana]; contains Pfam profile PF00657: Lipase/Acylhydrolase with GDSL-like motif
A012987_01	0	-0.584	-1.502		At4g12730	fasciclin-like arabinogalactan-protein (FLA2) identical to gi_13377778_gb_AAK20858
A013519_01	0	-0.443	-1.311		At4g08870	arginase, putative similar to Swiss-Prot:P46637 arginase (EC 3.5.3.1) [Arabidopsis thaliana]
A013863_01	0	-0.412	-1.052		At4g20760	short-chain dehydrogenase/reductase (SDR) family protein contains Pfam profile: PF00106 short chain dehydrogenase
A014016_01	0	-0.571	-0.999		At4g14010	rapid alkalinization factor (RALF) family protein similar to RALF precursor [Nicotiana tabacum] GI:16566316
A014121_01	0	-0.623	-1.171		At4g00360	cytochrome P450, putative
A014198_01	0	-0.284	-1.458		At4g37400	cytochrome P450 family protein similar to cytochrome P450 monooxygenase CYP91A2, Arabidopsis thaliana, D78607
A014719_01	0	-0.411	-1.211		At4g16000	expressed protein
A014826_01	0	-0.393	-1.23		At4g30460	glycine-rich protein
A014951_01	0	-0.907	-1.253		At4g30450	glycine-rich protein
A015102_01	0	-1.012	-1.338		At4g33010	glycine dehydrogenase [decarboxylating], putative / glycine decarboxylase, putative / glycine cleavage system P-protein, putative strong similarity to SP|P49361 Glycine dehydrogenase [decarboxylating] A, mitochondrial precursor (EC 1.4.4.2) {Flaveria prin
A015529_01	0	-0.417	-1.151		At5g53710	expressed protein
A015904_01	0	-0.855	-1.245		At5g43750	expressed protein
A016094_01	0	-0.366	-1.053		At5g65140	trehalose-6-phosphate phosphatase, putative similar to trehalose-6-phosphate phosphatase (AtTPPB) [Arabidopsis thaliana] GI:2944180; contains Pfam profile PF02358: Trehalose-phosphatase
A016127_01	0	-1.069	-1.739		At5g23750	remorin family protein contains Pfam domain, PF03766: Remorin, N-terminal region; contains Pfam domain, PF03763: Remorin, C-terminal region
A016257_01	0	-0.832	-1.291		At5g47250	disease resistance protein (CC-NBS-LRR class), putative domain signature CC-NBS-LRR exists, suggestive of a disease resistance protein.
A016356_01	0	-0.727	-1.255		At5g58900	myb family transcription factor contains Pfam profile: PF00249 myb-like DNA-binding domain
A016673_01	0	-0.507	-0.942		At5g54630	zinc finger protein-related contains Prosite:PS00028 Zinc finger, C2H2 type, domain
A016676_01	0	-1.83	-3.082		At5g02540	short-chain dehydrogenase/reductase (SDR) family protein contains INTERPRO family IPR002198 Short-chain dehydrogenase/reductase (SDR) superfamily
A016693_01	0	-1.083	-1.821		At5g02760	protein phosphatase 2C family protein / PP2C family protein similar to Ser/Thr protein phosphatase 2C (PP2C6) (GI:15020818) [Arabidopsis thaliana]; similar to protein phosphatase 2C (GI:3608412) [Mesembryanthemum crystallinum]; contains Pfam PF00481 : Pro
A016860_01	0	-0.617	-1.231		At5g09760	pectinesterase family protein contains Pfam profile: PF01095 pectinesterase
A016938_01	0	-0.77	-1.272		At5g22390	expressed protein
A017060_01	0	-1.383	-1.92		At5g62280	expressed protein
A017087_01	0	-0.763	-1.363		At5g48300	glucose-1-phosphate adenylyltransferase small subunit 1 (APS1) / ADP-glucose pyrophosphorylase (ADG1) identical to SP|P55228
A017117_01	0	-0.303	-1.289		At5g51890	peroxidase-related similar to peroxidase [Spinacia oleracea] gi|2956707|emb|CAA76376
A017502_01	0	-0.453	-1.075		At5g47100	calcineurin B-like protein 9 (CBL9) identical to calcineurin B-like protein 9 (GI:5866279) and calcium-binding protein AtCBL9 (GI:16151825) [Arabidopsis thaliana]; similar to calcineurin B-like protein 1 (GI:3309082) [Arabidopsis thaliana]
A017911_01	0	-0.969	-1.814		At5g62220	exostosin family protein contains Pfam profile: PF03016 Exostosin family
A017942_01	0	-0.639	-1.629		At5g22580	expressed protein
A018150_01	0	-0.885	-1.583		At5g25190	ethylene-responsive element-binding protein, putative ethylene responsive element binding protein homolog, Stylosanthes hamata, EMBL:U91857
A018402_01	0	-0.518	-1.083		At5g55400	fimbrin-like protein, putative similar to fimbrin-like protein (ATFIM1) [Arabidopsis thaliana] GI:2905893; contains Pfam profile PF00307: Calponin homology (CH) domain
A019002_01	0	-0.29	-1.51		At5g22460	esterase/lipase/thioesterase family protein low similarity to 2-hydroxy-6-oxo-6-phenylhexa-2,4-dienoate hydrolase [Rhodococcus sp. RHA1] GI:8978311, SP|Q02104 Lipase 1 precursor (EC 3.1.1.3) (Triacylglycerol lipase) {Psychrobacter immobilis}; contains Int
A019079_01	0	-1.073	-1.417		At5g43150	expressed protein
A019153_01	0	-0.433	-1.113		At5g40380	protein kinase family protein contains Pfam domain, PF00069: Protein kinase domain
A019538_01	0	-1.051	-2.736		At4g33790	acyl CoA reductase, putative similar to acyl CoA reductase [Simmondsia chinensis] GI:5020215; contains Pfam profile PF03015: Male sterility protein; No start codon identified, may contain anomalous splicing at 5' end.
A019761_01	0	-0.318	-1.174		At1g04680	pectate lyase family protein similar to pectate lyase GP:14531296 from [Fragaria x ananassa]
A019856_01	0	-0.718	-1.817		At2g47880	glutaredoxin family protein contains INTERPRO Domain IPR002109, Glutaredoxin (thioltransferase)
A019888_01	0	-0.836	-1.67		At2g44940	AP2 domain-containing transcription factor TINY, putative similar to transcription factor TINY (GI:1246403) [Arabidopsis thaliana]; contains pFAM domain (PF00847)
A019893_01	0	-1.051	-1.764		At1g64780	ammonium transporter 1, member 2 (AMT1.2) nearly identical to SP|Q9ZPJ8 Ammonium transporter 1, member 2 (AtAMT1;2) {Arabidopsis thaliana}
A020013_01	0	-1.169	-2.344		At4g37800	xyloglucan:xyloglucosyl transferase, putative / xyloglucan endotransglycosylase, putative / endo-xyloglucan transferase, putative similar to N-terminal partial sequence of endo-xyloglucan transferase GI:2244732 from [Gossypium hirsutum]
A020171_01	0	-0.654	-1.284		At3g02730	thioredoxin, putative similar to SP|P29450 Thioredoxin F-type, chloroplast precursor (TRX-F) {Pisum sativum}; contains Pfam profile: PF00085 Thioredoxin
A020187_01	0	-0.15	-1.343		At3g62020	germin-like protein (GLP10) identical to germin-like protein subfamily 2 member 4 [SP|Q9M263]
A020410_01	0	-1.004	-1.686		At2g28470	beta-galactosidase, putative / lactase, putative similar to Beta-galactosidase precursor SP:P48980 from [Lycopersicon esculentum]
A021044_01	0	-1.039	-1.772		At4g24780	pectate lyase family protein similar to pectate lyase GP:14289169 from [Salix gilgiana]
A021941_01	0	-0.457	-1.014		At3g27360	histone H3 identical to histone H3 from Zea mays SP|P05203, Medicago sativa GI:166384, Encephalartos altensteinii SP|P08903, Pisum sativum SP|P02300; contains Pfam profile PF00125 Core histone H2A/H2B/H3/H4
A022324_01	0	-0.632	-1.049		At4g21930	expressed protein contains Pfam profile PF04520: Protein of unknown function, DUF584
A023864_01	0	-0.66	-1.041		At1g49580	calcium-dependent protein kinase, putative / CDPK, putative similar to calcium/calmodulin-dependent protein kinase CaMK3 [Nicotiana tabacum] gi|16904226|gb|AAL30820; contains protein kinase domain, Pfam:PF00069; contains serine/threonine protein kinase do
A024038_01	0	-0.505	-1.591		At1g75280	isoflavone reductase, putative identical to SP|P52577 Isoflavone reductase homolog P3 (EC 1.3.1.-) {Arabidopsis thaliana}; contains Pfam profile PF02716: isoflavone reductase
A024165_01	0	-0.62	-1.27		At1g70550	expressed protein similar to hypothetical protein GB:AAD31338 [Arabidopsis thaliana] and to putative putative carboxyl-terminal peptidase GB:AAC16072 [Arabidopsis thaliana] contains Pfam profile PF03080: Arabidopsis proteins of unknown function
A024432_01	0	-1.794	-2.754		At1g13650	expressed protein
A025469_01	0	-0.743	-1.421		At2g35860	beta-Ig-H3 domain-containing protein / fasciclin domain-containing protein contains Pfam profile PF02469: Fasciclin domain
A200024_01	0	-1.363	-2.73		At1g58280	expressed protein
A200031_01	0	-0.713	-1.294		At1g69530	expansin, putative (EXP1) identical to expansin (At-EXP1) [Arabidopsis thaliana] GI:1041702; alpha-expansin gene family, PMID:11641069
A200386_01	0	-0.503	-1.677		At1g14520	oxygenase-related similar to myo-inositol oxygenase [Sus scrofa] gi|17432544|gb|AAL39076
A200440_01	0	-1.039	-1.388		At1g18360	hydrolase, alpha/beta fold family protein similar to monoglyceride lipase from [Homo sapiens] GI:14594904, [Mus musculus] GI:2632162,[Rattus norvegicus] GI:19697886; contains Pfam profile PF00561: hydrolase, alpha/beta fold family
A200546_01	0	-0.997	-1.794		At1g26945	expressed protein supported by full length cDNA gi:26453215 from [Arabidopsis thaliana]
A200574_01	0	-1.042	-1.558		At1g29490	auxin-responsive family protein similar to auxin-induced protein X10A (SP:P33080) [Glycine max]
A200579_01	0	-1.193	-2.11		At1g29920	chlorophyll A-B binding protein 165/180, chloroplast / LHCII type I CAB-165/180 identical to SP|P04777 Chlorophyll A-B binding protein 165/180, chloroplast precursor (LHCII type I CAB-165/180) (LHCP) {Arabidopsis thaliana}; similar to photosystem II type
A200805_01	0	-0.754	-1.241		At1g52565	expressed protein
A201001_01	0	-1.07	-2.131		At1g69523	UbiE/COQ5 methyltransferase family protein low similarity to SP|Q05197 Phosphatidylethanolamine N-methyltransferase (EC 2.1.1.17) [Rhodopseudomonas sphaeroides] {Rhodobacter sphaeroides}; contains Pfam profile PF01209: methlytransferase, UbiE/COQ5 family
A201006_01	0	-0.205	-1.585		At1g70210	cyclin delta-1 (CYCD1) nearly identical to SP|P42751 Cyclin delta-1 {Arabidopsis thaliana}
A201347_01	0	-0.29	-1.082		At2g22795	expressed protein
A201461_01	0	-0.636	-0.987		At2g36145	expressed protein
A201505_01	0	-1.049	-1.669		At2g40475	expressed protein
A201515_01	0	-0.41	-1.255		At2g41170	F-box family protein contains Pfam PF00646: F-box domain; similar to SKP1 interacting partner 2 (SKIP2) TIGR_Ath1:At5g67250
A201577_01	0	-0.607	-1.146		At3g03850	auxin-responsive protein, putative similar to small auxin-up regulated protein SAUR (GI:3043536) [Raphanus sativus]
A201788_01	0	-0.18	-1.263		At3g26960	expressed protein
A201970_01	0	-0.804	-1.555		At3g48420	haloacid dehalogenase-like hydrolase family protein low similarity to SP|P95649 CbbY protein {Rhodobacter sphaeroides}; contains InterPro accession IPR005834: Haloacid dehalogenase-like hydrolase
A201987_01	0	-0.619	-0.988		At3g50685	expressed protein
A202253_01	0	-0.946	-1.697		At4g14740	expressed protein
A202416_01	0	-0.442	-1.074		At4g25830	integral membrane family protein contains TIGRFAM TIGR01569 : plant integral membrane protein TIGR01569; contains Pfam PF04535 : Domain of unknown function (DUF588)
A202551_01	0	-0.464	-1.048		At5g04360	pullulanase, putative / starch debranching enzyme, putative similar to pullulanase [Spinacia oleracea] GI:634093 (EC 3.2.1.41); contains Pfam profiles PF00128: Alpha amylase catalytic domain, PF02922: Isoamylase N-terminal domain
A202617_01	0	-0.795	-1.115		At5g18460	expressed protein predicted proteins, Arabidopsis thaliana Pfam profile PF03080: Arabidopsis proteins of unknown function
A202743_01	0	-0.573	-0.96		At5g20270	expressed protein contains Pfam domain, PF03006: Uncharacterised protein family (Hly-III / UPF0073)
A202790_01	0	-0.659	-0.992		At5g20935	expressed protein
A203300_01	0	-0.516	-1.206		At5g49215	glycoside hydrolase family 28 protein / polygalacturonase (pectinase) family protein weak similarity to polygalacturonase [Brassica napus] GI:1212786; contains PF00295: Glycosyl hydrolases family 28
At30000086	0	-0.374	-1.477		At1g01790	K+ efflux antiporter, putative (KEA1) identical to GB:AAD01191 GI:4101473 from [ Arabidopsis thaliana]; Monovalent cation:proton antiporter family 2 (CPA2 family) member, PMID:11500563
At30000137	0	-0.961	-1.434		At1g02205	CER1 protein identical to maize gl1 homolog (glossy1 locus) GI:1209703 and CER1 GI:1199467 from [Arabidopsis thaliana]
At30000138	0	-0.983	-1.332		At1g02205	CER1 protein identical to maize gl1 homolog (glossy1 locus) GI:1209703 and CER1 GI:1199467 from [Arabidopsis thaliana]
At30000354	0	0.013	-1.342		At1g04040	acid phosphatase class B family protein similar to SP|P15490 STEM 28 kDa glycoprotein precursor (Vegetative storage protein A) {Glycine max}, acid phosphatase [Glycine max] GI:3341443; contains Pfam profile PF03767: HAD superfamily (subfamily IIIB) phosph
At30003052	0	0.001	-1.351		At1g29050	expressed protein similar to hypothetical protein GB:AAB67625 GI:2342727 from [Arabidopsis thaliana]
At30003093	0	-1.291	-1.915		At1g29440	auxin-responsive family protein similar to auxin-induced protein 6B (SP:P33083) [Glycine max]
At30003094	0	-0.892	-1.238		At1g29450	auxin-responsive protein, putative similar to auxin-induced protein 6B (SP:P33083) [Glycine max]
At30003608	0	-0.634	-1.397		At1g34520	long-chain-alcohol O-fatty-acyltransferase family protein / wax synthase family protein wax synthase - Simmondsia chinensis, PID:g5020219 similar to wax synthase [gi:5020219] from Simmondsia chinensis
At30004519	0	-0.661	-2.733		At1g52400	glycosyl hydrolase family 1 protein / beta-glucosidase, putative (BG1) contains Pfam PF00232 : Glycosyl hydrolase family 1 domain; TIGRFAM TIGR01233: 6-phospho-beta-galactosidase; identical to GI:6651430 from [Arabidopsis thaliana]
At30004570	0	-0.791	-0.995		At1g52827	expressed protein
At30005012	0	-0.628	-1.562		At1g56720	protein kinase family protein contains protein kinase domain, Pfam:PF00069
At30005080	0	-1.312	-2.462		At1g58280	expressed protein
At30005444	0	-0.526	-1.087		At1g62660	beta-fructosidase (BFRUCT3) / beta-fructofuranosidase / invertase, vacuolar identical to beta-fructosidase GB:CAA67560 GI:1429209 [Arabidopsis thaliana]; supported by full-length cDNA GI:14517549; identical to cDNA Beta-fructosidase GI:3115854
At30006713	0	-1.287	-2.041		At1g74070	peptidyl-prolyl cis-trans isomerase cyclophilin-type family protein contains Pfam domain, PF00160: peptidyl-prolyl cis-trans isomerase, cyclophilin-type
At30007767	0	-0.567	-1.154		At2g03710	MADS-box protein (AGL3)
At30008252	0	-0.466	-1.296		At2g13820	protease inhibitor/seed storage/lipid transfer protein (LTP) family protein contains Pfam protease inhibitor/seed storage/LTP family domain PF00234
At30008354	0	-0.152	-1.215		At2g15050	lipid transfer protein, putative similar to SP|Q42641 nonspecific lipid-transfer protein A precursor (LTP A) (Wax-associated protein 9A) {Brassica oleracea}; contains Pfam Protease inhibitor/seed storage/LTP family domain PF00234
At30008896	0	-0.58	-1.132		At2g20340	tyrosine decarboxylase, putative similar to tyrosine/dopa decarboxylase [Papaver somniferum] GI:3282527, SP|Q06087 Tyrosine decarboxylase 3 (EC 4.1.1.25) {Petroselinum crispum}; contains Pfam profile PF00282: Pyridoxal-dependent decarboxylase conserved do
At30009160	0	-0.404	-1.282		At2g22670	auxin-responsive protein / indoleacetic acid-induced protein 8 (IAA8) identical to SP|Q38826 Auxin-responsive protein IAA8 (Indoleacetic acid-induced protein 8) {Arabidopsis thaliana}
At30009274	0	-0.58	-1.392		At2g23690	expressed protein
At30009590	0	-0.444	-1.547		At2g26695	zinc finger (Ran-binding) family protein contains Pfam profile PF00641: Zn-finger in Ran binding protein and others
At30010268	0	-0.778	-1.091		At2g32640	expressed protein
At30010785	0	-0.451	-1.331		At2g37040	phenylalanine ammonia-lyase 1 (PAL1) nearly identical to SP|P35510
At30012149	0	-1.216	-1.948		At3g01500	carbonic anhydrase 1, chloroplast / carbonate dehydratase 1 (CA1) nearly identical to SP|P27140 Carbonic anhydrase, chloroplast precursor (EC 4.2.1.1) (Carbonate dehydratase) {Arabidopsis thaliana}
At30012418	0	-0.687	-1.208		At3g03820	auxin-responsive protein, putative similar to auxin-inducible SAUR (Small Auxin Up RNAs) (GI:3043536) [Raphanus sativus]
At30012420	0	-0.568	-1.33		At3g03840	auxin-responsive protein, putative similar to auxin-inducible SAUR (Small Auxin Up RNAs) (GI:3043536) [Raphanus sativus]
At30014441	0	-0.163	-1.246		At3g21190	expressed protein contains Pfam PF03138: Plant protein family. The function of this family of plant proteins is unknown;
At30014529	0	-0.631	-2.318		At3g21950	S-adenosyl-L-methionine:carboxyl methyltransferase family protein similar to SAM:salicylic acid carboxyl methyltransferase (SAMT) [GI:6002712][Clarkia breweri] and to SAM:benzoic acid carboxyl methyltransferase (BAMT)[GI:9789277][Antirrhinum majus]
At30014703	0	-0.52	-0.975		At3g23530	cyclopropane fatty acid synthase, putative / CPA-FA synthase, putative similar to cyclopropane synthase [Sterculia foetida] GI:21069167; contains Pfam profiles PF02353: Cyclopropane-fatty-acyl-phospholipid synthase, PF01593: amine oxidase, flavin-containi
At30015279	0	-0.081	-1.328		At3g28857	expressed protein
At30016077	0	-0.536	-1.06		At3g47560	esterase/lipase/thioesterase family protein low similarity to cinnamoyl ester hydrolase CinI [Butyrivibrio fibrisolvens] GI:1622732; contains Interpro entry IPR000379
At30016599	0	-1.188	-1.466		At3g52360	expressed protein
At30016641	0	-0.664	-1.313		At3g52720	carbonic anhydrase family protein low similarity to storage protein (dioscorin) [Dioscorea cayenensis] GI:433463; contains Pfam profile PF00194: Eukaryotic-type carbonic anhydrase
At30016946	0	-0.354	-1.027		At3g55310	short-chain dehydrogenase/reductase (SDR) family protein contains similarity to 3-oxoacyl-[acyl-carrier protein] reductase SP:P51831 from [Bacillus subtilis]
At30017660	0	-0.548	-0.879		At3g61870	expressed protein hypothetical protein - Synechocystis sp. (strain PCC 6803), PIR:S75899
At30017678	0	-0.126	-1.25		At3g62020	germin-like protein (GLP10) identical to germin-like protein subfamily 2 member 4 [SP|Q9M263]
At30018395	0	-2.285	-3.169		At4g04840	methionine sulfoxide reductase domain-containing protein / SeIR domain-containing protein low similarity to pilin-like transcription factor [Homo sapiens] GI:5059062; contains Pfam profile PF01641: SelR domain
At30018890	0	-0.933	-2.883		At4g11211	expressed protein
At30019026	0	-1.294	-2.514		At4g12520	protease inhibitor/seed storage/lipid transfer protein (LTP) family protein similar to 14 kDa polypeptide [Catharanthus roseus] GI:407410; contains Pfam protease inhibitor/seed storage/LTP family domain PF00234
At30020246	0	-0.51	-0.977		At4g22890	expressed protein
At30020308	0	-0.323	-1.36		At4g23430	short-chain dehydrogenase/reductase (SDR) family protein contains INTERPRO family IPR002198 Short-chain dehydrogenase/reductase (SDR) superfamily; contains Pfam PF00106: oxidoreductase, short chain dehydrogenase/reductase family
At30020675	0	-1.321	-3.463		At4g26530	fructose-bisphosphate aldolase, putative strong similarity to SP|P22197 Fructose-bisphosphate aldolase, cytoplasmic isozyme (EC 4.1.2.13) {Arabidopsis thaliana}
At30021499	0	-0.501	-0.944		At4g33520	metal-transporting P-type ATPase, putative (PAA1) nearly identical to gi:2668492; contains Pfam heavy-metal-associated domain PF00403
At30021569	0	-0.617	-1.012		At4g34090	expressed protein
At30022584	0	-1.444	-2.83		At5g03760	glycosyl transferase family 2 protein similar to beta-(1-3)-glucosyl transferase GB:AAC62210 GI:3687658 from [Bradyrhizobium japonicum], cellulose synthase from Agrobacterium tumeficiens [gi:710492] and Agrobacterium radiobacter [gi:710493]; contains Pfam
At30022957	0	-1.251	-2.06		At5g07000	sulfotransferase family protein similar to steroid sulfotransferase 3 [Brassica napus] GI:3420008, steroid sulfotransferase 1 [Brassica napus] GI:3420004; contains Pfam profile PF00685: Sulfotransferase domain
At30024092	0	-0.865	-1.442		At5g18010	auxin-responsive protein, putative similar to auxin-inducible SAUR (Small Auxin Up RNAs) (GI:3043536) [Raphanus sativus]
At30024093	0	-0.985	-1.763		At5g18020	auxin-responsive protein, putative similar to auxin-inducible SAUR (Small Auxin Up RNAs) (GI:3043536) [Raphanus sativus]
At30024094	0	-0.751	-1.477		At5g18030	auxin-responsive protein, putative similar to auxin-inducible SAUR (Small Auxin Up RNAs) (GI:3043536) [Raphanus sativus]
At30024096	0	-0.87	-1.336		At5g18050	auxin-responsive protein, putative similar to auxin-inducible SAUR (Small Auxin Up RNAs) (GI:3043536) [Raphanus sativus]
At30024097	0	-0.796	-1.227		At5g18060	auxin-responsive protein, putative similar to auxin-inducible SAUR (Small Auxin Up RNAs) GI:3043536 from radish [Raphanus sativus]
At30024100	0	-0.757	-1.428		At5g18080	auxin-responsive protein, putative similar to GP:3043536 SAUR {Raphanus sativus}
At30024680	0	-0.84	-1.703		At5g23750	remorin family protein contains Pfam domain, PF03766: Remorin, N-terminal region; contains Pfam domain, PF03763: Remorin, C-terminal region
At30024681	0	-0.863	-1.727		At5g23750	remorin family protein contains Pfam domain, PF03766: Remorin, N-terminal region; contains Pfam domain, PF03763: Remorin, C-terminal region
At30025537	0	-2.14	-3.302		At5g37300	expressed protein
At30025808	0	-0.804	-1.179		At5g39860	bHLH protein putative DNA-binding protein - Arabidopsis thaliana, EMBL:AC011765
At30028725	0	-0.279	-1.277		At5g65360	histone H3 identical to histone H3 from Zea mays SP|P05203, Medicago sativa GI:166384, Encephalartos altensteinii SP|P08903, Pisum sativum SP|P02300; contains Pfam profile PF00125 Core histone H2A/H2B/H3/H4

## Sheet: SOM4 Down
Oligo ID	Mock	TEV	TEV-At		Gene	Annotation
A000059_01	0	0.007	-0.627		At1g12110	nitrate/chlorate transporter (NRT1.1) (CHL1) identical to nitrate/chlorate transporter SP:Q05085 from [Arabidopsis thaliana]; contains Pfam profile: PF00854 POT family
A000080_01	0	0.09	-0.294		At1g53050	protein kinase family protein contains Pfam domain, PF00069: Protein kinase domain
A000107_01	0	-0.236	-0.618		At1g05170	galactosyltransferase family protein
A000118_01	0	0.049	-0.47		At1g61170	expressed protein
A000259_01	0	0.015	-0.574		At1g66350	gibberellin regulatory protein (RGL1) similar to GB:CAA75492 from [Arabidopsis thaliana]; contains Pfam profile PF03514: GRAS family transcription factor; identical to cDNA RGL1 protein GI:15777856, RGL1 protein [Arabidopsis thaliana] GI:15777857
A000268_01	0	-0.017	-0.197		At1g47260	bacterial transferase hexapeptide repeat-containing protein contains Pfam profile PF00132: Bacterial transferase hexapeptide (four repeats)
A000381_01	0	0.019	-1.053		At1g01600	cytochrome P450, putative similar to cytochrome P450 GI:10442763 from [Triticum aestivum]
A000403_01	0	-0.324	-0.645		At1g23750	DNA-binding protein-related contains weak similarity to G-quartet DNA binding protein 3 [Tetrahymena thermophila] gi|4583503|gb|AAD25098
A000406_01	0	-0.334	-0.501		At1g32470	glycine cleavage system H protein, mitochondrial, putative similar to SP|P25855 Glycine cleavage system H protein 1, mitochondrial precursor {Arabidopsis thaliana}; contains Pfam profile PF01597: Glycine cleavage H-protein
A000431_01	0	0.541	-0.93		At1g03820	expressed protein similar to arabinogalactan-protein; AGP (GI:1087015) {Pyrus communis}; similar to Protein E6. (SP:Q01197) {Gossypium hirsutum}
A000511_01	0	-0.316	-0.612		At1g53730	leucine-rich repeat transmembrane protein kinase, putative similar to GI:3360289 from [Zea mays] (Plant Mol. Biol. 37 (5), 749-761 (1998))
A000598_01	0	-0.269	-0.609		At1g66250	glycosyl hydrolase family 17 protein similar to beta-1,3-glucanase GI:15150341 from [Camellia sinensis]
A000605_01	0	-0.137	-0.49		At1g61350	armadillo/beta-catenin repeat family protein armadillo/beta-catenin-like repeats, Pfam:PF00514
A000619_01	0	0.224	-0.749		At1g64360	expressed protein
A000627_01	0	-0.247	-0.9		At1g10380	expressed protein
A000875_01	0	-0.341	-0.523		At1g72880	acid phosphatase survival protein SurE, putative similar to Swiss-Prot:P36664 acid phosphatase surE (EC 3.1.3.2) (Stationary-phase survival protein surE) [Escherichia coli O157:H7]; contains Pfam domain PF01975: Survival protein SurE
A000914_01	0	-0.217	-0.448		At1g31930	extra-large guanine nucleotide binding protein, putative / G-protein, putative similar to extra-large G-protein (XLG) [Arabidopsis thaliana] GI:3201680; contains Pfam profile PF00503: G-protein alpha subunit
A000955_01	0	-0.073	-0.424		At1g67410	exostosin family protein contains Pfam profile: PF03016 Exostosin family
A000975_01	0	-0.182	-0.49		At1g80640	protein kinase family protein contains protein kinase domain, Pfam:PF00069
A001088_01	0	0.021	-0.239		At1g71696	carboxypeptidase D, putative similar to carboxypeptidase D [Anas platyrhynchos] gi|2789654|gb|AAB96915
A001188_01	0	-0.219	-0.744		At1g22710	sucrose transporter / sucrose-proton symporter (SUC2) nearly identical to sucrose-proton symporter SUC2 [Arabidopsis thaliana] GI:407092
A001237_01	0	-0.351	-0.725		At1g67480	kelch repeat-containing F-box family protein similar to SKP1 interacting partner 6 [Arabidopsis thaliana] GI:10716957; contains Pfam profiles PF01344: Kelch motif, PF00646: F-box domain
A001491_01	0	0.026	-0.585		At1g67870	glycine-rich protein contains non-consensus GG donor splice site at exon2; modeled to est match.
A001507_01	0	-0.053	-0.249		At1g52220	expressed protein
A001609_01	0	-0.378	-0.696		At1g32070	GCN5-related N-acetyltransferase (GNAT) family protein / nuclear shuttle interacting protein (NSI) very low similarity to SP|P09453 Ribosomal-protein-alanine acetyltransferase (EC 2.3.1.128) {Escherichia coli}; contains Pfam profile PF00583: acetyltransfe
A001655_01	0	-0.503	-0.73		At1g66190	expressed protein ; expression supported by MPSS
A001703_01	0	-0.215	-0.76		At1g29520	AWPM-19-like membrane family protein contains Pfam profile: PF05512 AWPM-19-like family
A001740_01	0	-0.082	-0.506		At1g73655	immunophilin / FKBP-type peptidyl-prolyl cis-trans isomerase family protein similar to (Peptidyl-prolyl cis-trans isomerase) (PPiase) (Rotamase) (SP:Q26486) [Spodoptera frugiperda]; contains Pfam PF00254: peptidyl-prolyl cis-trans isomerase, FKBP-type
A001745_01	0	0.057	-0.625		At1g78210	hydrolase, alpha/beta fold family protein low similarity to hydrolases from Rhodococcus sp. EtbD2 GI:3273241, EtbD1 GI:3273239; contains Pfam profile PF00561: hydrolase, alpha/beta fold family
A001819_01	0	-0.046	-0.323		At1g26940	peptidyl-prolyl cis-trans isomerase cyclophilin-type family protein contains Pfam domain, PF00160: peptidyl-prolyl cis-trans isomerase, cyclophilin-type
A001889_01	0	-0.085	-0.381		At1g11660	heat shock protein, putative strong similarity to gb|Z70314 heat-shock protein from Arabidopsis thaliana and is a member of the PF|00012 Hsp70 protein family
A001907_01	0	-0.182	-1.025		At1g51170	protein kinase family protein
A002017_01	0	0.05	-0.504		At1g21830	expressed protein EST gb|T21171 comes from this gene
A002062_01	0	0.239	-0.682		At1g69830	alpha-amylase, putative / 1,4-alpha-D-glucan glucanohydrolase, putative similar to SP|P17859 Alpha-amylase precursor (EC 3.2.1.1) (1,4-alpha-D-glucan glucanohydrolase) {Vigna mungo}, alpha-amylase [Malus x domestica] GI:7532799; contains Pfam profile PF00
A002102_01	0	0.089	-0.39		At1g02640	glycosyl hydrolase family 3 protein similar to beta-xylosidase GB:Z84377 GI:2102655 from [Aspergillus niger]
A002408_01	0	-0.104	-0.579		At1g16960	expressed protein
A002623_01	0	-0.001	-0.345		At1g12420	ACT domain-containing protein (ACR8) contains Pfam ACT domain PF01842
A002634_01	0	-0.218	-0.62		At1g73670	mitogen-activated protein kinase, putative / MAPK, putative (MPK15) similar to mitogen-activated protein kinase GB:A56042 [Dictyostelium discoideum]; mitogen-activated protein kinase (MAPK)(AtMPK15), PMID:12119167; contains Pfam profile: PF00069 Eukaryoti
A002674_01	0	-0.243	-0.771		At1g67900	phototropic-responsive NPH3 family protein contains NPH3 family domain, Pfam:PF03000
A002862_01	0	-0.024	-0.364		At1g09390	GDSL-motif lipase/hydrolase family protein Similar to early nodulin ENOD8 [Medicago sativa] GI:304037, lanatoside 15'-O-acetylesterase [Digitalis lanata] GI:3688284, elicitor-induced glycoprotein iEP4 [Daucus carota] GI:1911765; contains InterPro Entry IP
A002895_01	0	-0.288	-0.763		At1g56190	phosphoglycerate kinase, putative similar to SP|P41758 Phosphoglycerate kinase, chloroplast precursor (EC 2.7.2.3) {Chlamydomonas reinhardtii}; contains Pfam profile PF00162: phosphoglycerate kinase
A002959_01	0	0.493	-0.956		At1g72940	disease resistance protein (TIR-NBS class), putative domain signature TIR-NBS exists, suggestive of a disease resistance protein.
A002999_01	0	-0.331	-0.855		At1g56580	expressed protein contains Pfam profile PF04398: Protein of unknown function, DUF538
A003024_01	0	0.002	-0.49		At1g01610	phospholipid/glycerol acyltransferase family protein similar to unknown protein GI:3335359 from [Arabidopsis thaliana]
A003532_01	0	-0.213	-0.418		At1g64620	Dof-type zinc finger domain-containing protein similar to Dof zinc finger protein GB:CAA08755 GI:3341468 from [Nicotiana tabacum]
A003542_01	0	-0.264	-0.918		At1g63310	expressed protein similar to unknown protein GB:AAC69930 from [Arabidopsis thaliana]
A003637_01	0	0.022	-0.337		At1g16920	Ras-related GTP-binding protein, putative similar to GTP binding protein GI:218228 from [Vicia faba]; identical to cDNA small GTP-binding protein (Rab11) GI:451859
A003645_01	0	0.326	-0.634		At1g20823	zinc finger (C3HC4-type RING finger) family protein contains Pfam domain, PF00097: Zinc finger, C3HC4 type (RING finger)
A003673_01	0	0.032	-0.321		At1g16780	vacuolar-type H+-translocating inorganic pyrophosphatase, putative similar to vacuolar-type H+-translocating inorganic pyrophosphatase GI:6901676 from [Arabidopsis thaliana]
A003691_01	0	-0.32	-0.885		At1g10900	phosphatidylinositol-4-phosphate 5-kinase family protein similar to phosphatidylinositol-4-phosphate 5-kinase AtPIP5K1 [Arabidopsis thaliana] GI:3702691; contains Pfam profiles PF01504: Phosphatidylinositol-4-phosphate 5-Kinase, PF02493: MORN repeat
A003878_01	0	-0.04	-0.959		At1g52830	auxin-responsive protein / indoleacetic acid-induced protein 6 (IAA6) nearly identical to SP|Q38824 Auxin-responsive protein IAA6 (Indoleacetic acid-induced protein 6) {Arabidopsis thaliana}
A003932_01	0	-0.345	-0.708		At1g11790	prephenate dehydratase family protein similar to gi|2392772 and is a member of the PF|00800 Prephenate dehydratase family. ESTs gb|T21562 and gb|T21062 come from this gene
A004108_01	0	-0.451	-0.823		At1g30320	remorin family protein contains Pfam domain, PF03763: Remorin, C-terminal region
A004116_01	0	-0.25	-0.817		At1g08470	strictosidine synthase family protein similar to strictosidine synthase [Rauvolfia serpentina][SP|P15324]
A004219_01	0	-0.334	-0.621		At1g21350	expressed protein
A004260_01	0	-0.106	-0.422		At1g53720	cyclophilin-RNA interacting protein, putative
A004272_01	0	0.093	-0.428		At1g73630	calcium-binding protein, putative similar to calcium binding protein GI:14589311 from [Sesbania rostrata]; contains Pfam profile: PF00036 EF hand (4 copies)
A004283_01	0	0.025	-0.612		At1g63240	expressed protein
A004324_01	0	-0.1	-0.348		At1g74530	expressed protein
A004325_01	0	-0.219	-0.43		At1g74640	expressed protein contains Pfam profile: PF00561 alpha/beta hydrolase fold
A004434_01	0	-0.46	-0.664		At1g31420	leucine-rich repeat transmembrane protein kinase, putative contains Pfam profile: PF00069: Eukaryotic protein kinase domain
A004572_01	0	0.101	-0.266		At1g11580	pectin methylesterase, putative similar to pectin methylesterase GI:1617583 from [Lycopersicon esculentum]
A004621_01	0	-0.345	-0.813		At1g15580	auxin-responsive protein / indoleacetic acid-induced protein 5 (IAA5) / auxin-induced protein (AUX2-27) identical to SP|P33078 Auxin-responsive protein IAA5 (Indoleacetic acid-induced protein 5) (Auxin-induced protein AUX2-27) {Arabidopsis thaliana}
A004646_01	0	-0.205	-0.496		At1g19730	thioredoxin H-type 4 (TRX-H-4) (GREN) identical to SP|Q39239 Thioredoxin H-type 4 (TRX-H-4) {Arabidopsis thaliana}
A004664_01	0	-0.061	-0.437		At1g28100	expressed protein
A004818_01	0	0.069	-0.404		At1g12750	rhomboid family protein contains PFAM domain PF01694, Rhomboid family
A004846_01	0	-0.098	-0.396		At1g07570	protein kinase (APK1a) identical to Protein kinase APK1A from [Arabidopsis thaliana] SWISS-PROT:Q06548
A004978_01	0	0.511	-0.73		At5g04340	zinc finger (C2H2 type) family protein contains Pfam domain, PF00096: Zinc finger, C2H2 type
A005177_01	0	0.424	-1.138		At3g15540	auxin-responsive protein / indoleacetic acid-induced protein 19 (IAA19) identical to SP|O24409 Auxin-responsive protein IAA19 (Indoleacetic acid-induced protein 19) {Arabidopsis thaliana}
A005384_01	0	0.088	-0.489		At4g08685	pollen Ole e 1 allergen and extensin family protein contains Pfam domain, PF01190: Pollen proteins Ole e I family
A005648_01	0	0.056	-0.359		At2g04160	subtilisin-like protease (AIR3) almost identical to subtilisin-like protease AIR3 GI:4218991 from [Arabidopsis thaliana], missing 200 aa at N-terminus
A005712_01	0	-0.056	-1.133		At4g38620	myb family transcription factor (MYB4) contains Pfam profile: PF00249 myb-like DNA-binding domain
A005723_01	0	-0.301	-0.51		At1g60660	cytochrome b5 domain-containing protein contains InterPro accession IPR001199: Cytochrome b5
A005906_01	0	0.057	-0.713		At5g20150	SPX (SYG1/Pho81/XPR1) domain-containing protein similar to PHO1 protein [Arabidopsis thaliana] GI:20069032; contains Pfam profile PF03105: SPX domain
A005984_01	0	-0.431	-0.884		At1g75680	glycosyl hydrolase family 9 protein similar to endo-beta-1,4-glucanase GB:AAC12685 GI:3025470 from [Pinus radiata]
A006039_01	0	-0.274	-0.992		At2g03710	MADS-box protein (AGL3)
A006047_01	0	-0.01	-0.915		At2g16630	proline-rich family protein contains proline-rich extensin domains, INTERPRO:IPR002965
A006063_01	0	0.339	-0.708		At2g38530	nonspecific lipid transfer protein 2 (LTP2) identical to nonspecific lipid-transfer protein 2 from Arabidopsis thaliana [SP|Q9S7I3]; contains Pfam protease inhibitor/seed storage/LTP family domain PF00234
A006108_01	0	-0.121	-0.704		At2g39880	myb family transcription factor (MYB25) contains Pfam profile: PF00249 myb-like DNA-binding domain
A006126_01	0	0.063	-0.502		At2g46225	expressed protein
A006282_01	0	-0.125	-0.542		At2g38740	haloacid dehalogenase-like hydrolase family protein similar to SP|P71447 Beta-phosphoglucomutase (EC 5.4.2.6) {Lactococcus lactis}; contains InterPro accession IPR005834: Haloacid dehalogenase-like hydrolase
A006327_01	0	-0.121	-0.35		At2g30080	metal transporter, putative (ZIP6) identical to putative metal transporter ZIP6 [Arabidopsis thaliana] gi|17385786|gb|AAL38433; similar to zinc transporter protein ZIP1 [Glycine max] gi|15418778|gb|AAK37761; member of the Zinc (Zn2+)-Iron (Fe2+) permease
A006434_01	0	0.101	-0.421		At2g15680	calmodulin-related protein, putative similar to calmodulin-related protein 2, touch-induced SP:P25070 from [Arabidopsis thaliana]
A006471_01	0	-0.113	-0.388		At2g26640	beta-ketoacyl-CoA synthase, putative similar to beta-ketoacyl-CoA synthase [Simmondsia chinensis][GI:1045614]
A006483_01	0	-0.039	-0.444		At2g44600	expressed protein
A006526_01	0	0.464	-0.73		At2g43120	pirin, putative similar to SP|O00625 Pirin {Homo sapiens}; contains Pfam profile PF02678: Pirin
A006649_01	0	-0.053	-0.368		At2g22850	bZIP transcription factor family protein contains a bZIP transcription factor basic domain signature (PDOC00036)
A006733_01	0	-0.007	-0.275		At2g22010	zinc finger (C3HC4-type RING finger) family protein contains Pfam profile: PF00097 zinc finger, C3HC4 type (RING finger)
A006826_01	0	0.03	-0.486		At2g19570	cytidine deaminase (CDD) / cytidine aminohydrolase identical to cytidine deaminase (CDD) [Arabidopsis thaliana] GI:3046700
A006913_01	0	0.036	-0.329		At2g44670	senescence-associated protein-related similar to senescence-associated protein SAG102 (GI:22331931) [Arabidopsis thaliana];
A007004_01	0	-0.223	-0.563		At2g02450	no apical meristem (NAM) family protein contains Pfam PF02365: No apical meristem (NAM) domain
A007021_01	0	-0.102	-0.201		At2g25870	haloacid dehalogenase-like hydrolase family protein contains Pfam profiles PF00702: haloacid dehalogenase-like hydrolase, PF02130: Uncharacterized protein family UPF0054
A007278_01	0	-0.005	-0.358		At2g42320	nucleolar protein gar2-related contains weak similarity to Swiss-Prot:P41891 protein gar2 [Schizosaccharomyces pombe]
A007280_01	0	0	-0.265		At2g30950	FtsH protease (VAR2) identical to zinc dependent protease VAR2 GI:7650138 from [Arabidopsis thaliana]
A007300_01	0	0.129	-0.326		At2g44060	late embryogenesis abundant family protein / LEA family protein similar to ethylene-responsive late embryogenesis-like protein [Lycopersicon esculentum] GI:1684830; contains Pfam profile PF03168: Late embryogenesis abundant protein
A007353_01	0	0.23	-1.4		At2g32870	meprin and TRAF homology domain-containing protein / MATH domain-containing protein similar to ubiquitin-specific protease 12 [Arabidopsis thaliana] GI:11993471; contains Pfam profile PF00917: MATH domain
A007442_01	0	0.061	-1.154		At2g39350	ABC transporter family protein
A007669_01	0	-0.07	-0.572		At2g26540	uroporphyrinogen-III synthase family protein contains Pfam PF02602: uroporphyrinogen-III synthase; weak similarity to Porphyrin biosynthesis protein HEMD)) (Uroporphyrinogen III methylase) (UROM); Uroporphyrinogen-III synthase (EC 4.2.1.75) (Swiss-Prot:Q5
A007815_01	0	0.454	-0.686		At2g43550	trypsin inhibitor, putative similar to SP|P26780 Trypsin inhibitor 2 precursor (MTI-2) {Sinapis alba}
A007816_01	0	0.197	-0.481		At2g43530	trypsin inhibitor, putative similar to SP|P26780 Trypsin inhibitor 2 precursor (MTI-2) {Sinapis alba}
A007849_01	0	-0.184	-1.022		At2g35650	glycosyl transferase family 2 protein similar to beta-(1-3)-glucosyl transferase GB:AAC62210 GI:3687658 from [Bradyrhizobium japonicum], cellulose synthase from Agrobacterium tumeficiens [gi:710492] and Agrobacterium radiobacter [gi:710493]; contains Pfam
A007892_01	0	0.04	-0.602		At2g38760	annexin 3 (ANN3) nearly identical to annexin (AnnAt3) [Arabidopsis thaliana] GI:6503082; contains Pfam profile PF00191: Annexin
A007898_01	0	-0.183	-0.634		At2g36880	S-adenosylmethionine synthetase, putative similar to S-adenosylmethionine synthetase 3 (Methionine adenosyltransferase 3, AdoMet synthetase 3) [Lycopersicon esculentum] SWISS-PROT:P43282
A007956_01	0	-0.1	-0.402		At2g42880	mitogen-activated protein kinase, putative / MAPK, putative (MPK20) mitogen-activated protein kinase (MAPK)(AtMPK20), PMID:12119167
A007967_01	0	-0.127	-0.888		At2g16500	arginine decarboxylase 1 (SPE1) (ARGDC) identical to SP|Q9SI64 Arginine decarboxylase 1 (EC 4.1.1.19) (ARGDC 1) (ADC 1) (ADC-O) {Arabidopsis thaliana}
A007996_01	0	0.146	-0.394		At2g24570	WRKY family transcription factor identical to WRKY transcription factor 17 GI:15991743 from [Arabidopsis thaliana]
A008060_01	0	-0.105	-0.436		At2g05210	expressed protein
A008184_01	0	-0.395	-0.634		At2g21340	enhanced disease susceptibility protein, putative / salicylic acid induction deficient protein, putative similar to enhanced disease susceptibility 5 [Arabidopsis thaliana] GI:16589070
A008286_01	0	0.203	-0.641		At2g39900	LIM domain-containing protein similar to pollen specific LIM domain protein 1b [Nicotiana tabacum] GI:6467905, PGPS/D1 [Petunia x hybrida] GI:4105772; contains Pfam profile PF00412: LIM domain
A008298_01	0	-0.156	-0.469		At2g27130	protease inhibitor/seed storage/lipid transfer protein (LTP) family protein contains Pfam protease inhibitor/seed storage/LTP family domain PF00234
A008346_01	0	-0.026	-0.334		At2g23340	AP2 domain-containing transcription factor, putative
A008386_01	0	-0.182	-0.487		At2g05920	subtilase family protein contains similarity to cucumisin-like serine protease GI:3176874 from [Arabidopsis thaliana]
A008438_01	0	-0.427	-0.91		At2g46930	pectinacetylesterase, putative similar to pectinacetylesterase precursor GI:1431629 from [Vigna radiata]
A008445_01	0	-0.129	-0.309		At2g43030	ribosomal protein L3 family protein contains Pfam profile PF00297: ribosomal protein L3
A008488_01	0	-0.336	-0.95		At2g28410	expressed protein
A008613_01	0	-0.122	-0.656		At2g33570	expressed protein
A008614_01	0	-0.259	-0.608		At2g41310	two-component responsive regulator / response reactor 3 (RR3) identical to response reactor 3 GI:3273200 from [Arabidopsis thaliana]; contains Pfam profile: PF00072 response regulator receiver domain
A008631_01	0	0.2	-0.349		At2g38360	prenylated rab acceptor (PRA1) family protein weak similarity to prenylated Rab acceptor 1 (PRA1) [Homo sapiens] GI:4877285; contains Pfam profile PF03208: Prenylated rab acceptor (PRA1)
A008816_01	0	0.507	-0.863		At2g22330	cytochrome P450, putative similar to cytochrome P450 79B2 (SP:O81346) [Arabidopsis thaliana]
A008973_01	0	0.124	-0.517		At3g57630	exostosin family protein contains Pfam profile: PF03016 exostosin family
A008981_01	0	0.045	-0.199		At3g04580	ethylene receptor, putative (EIN4) similar to ethylene receptor GB:AAC31123 [Malus domestica], identical to putative ethylene receptor GB:AAD02485 [Arabidopsis thaliana]; Pfam HMM hit: response regulator receiver domain, signal C terminal domain
A009048_01	0	-0.377	-0.794		At3g46780	expressed protein
A009081_01	0	-0.07	-0.353		At3g11420	fringe-related protein similar to hypothetical protein GB:AAC23643 [Arabidopsis thaliana] + weak similarity to Fringe [Schistocerca gregaria](GI:6573138);Fringe encodes an extracellular protein that regulates Notch signalling.
A009259_01	0	0.007	-0.472		At3g44450	expressed protein
A009270_01	0	0.087	-0.23		At3g52640	nicastrin-related contains weak similarity to Nicastrin precursor (Swiss-Prot:Q92542) [Homo sapiens]
A009319_01	0	0.06	-0.901		At3g17120	expressed protein
A009325_01	0	0.093	-0.551		At3g29320	glucan phosphorylase, putative similar to alpha-glucan phosphorylase, L isozyme 1 precursor GB:P04045 from [Solanum tuberosum] (J. Biochem. 106 (4), 691-695 (1989))
A009480_01	0	-0.163	-0.685		At3g18560	expressed protein
A009530_01	0	-0.009	-0.737		At3g21550	expressed protein contains Pfam profile PF05078: Protein of unknown function (DUF679)
A009537_01	0	-0.234	-0.354		At3g49880	glycosyl hydrolase family protein 43 contains similarity to xylanase GI:2645416 from [Caldicellulosiruptor saccharolyticus]
A009633_01	0	-0.268	-0.737		At3g23400	plastid-lipid associated protein PAP / fibrillin family protein contains Pfam profile PF04755: PAP_fibrillin
A009752_01	0	0.07	-0.481		At3g07340	basic helix-loop-helix (bHLH) family protein contains Pfam profile: PF00010 helix-loop-helix DNA-binding domain
A009863_01	0	-0.503	-0.842		At3g20570	plastocyanin-like domain-containing protein
A009961_01	0	-0.117	-0.61		At3g26700	protein kinase family protein contains protein kinase domain, Pfam:PF00069
A010003_01	0	-0.518	-0.855		At3g02510	regulator of chromosome condensation (RCC1) family protein similar to UVB-resistance protein UVR8 [Arabidopsis thaliana] GI:5478530; contains Pfam profile PF00415: Regulator of chromosome condensation (RCC1)
A010051_01	0	-0.085	-0.626		At3g62110	glycoside hydrolase family 28 protein / polygalacturonase (pectinase) family protein weak similarity to polygalacturonase [Lycopersicon esculentum] GI:4325090; contains PF00295: Glycosyl hydrolases family 28
A010143_01	0	-0.216	-0.613		At3g25620	ABC transporter family protein similar to GB:AAC61893 from [Bactrocera tryoni] (Insect Mol. Biol. 6 (4), 343-356 (1997))
A010520_01	0	0.054	-0.412		At3g54910	expressed protein various pedicted proteins, Arabidopsis thaliana
A010660_01	0	0.008	-0.214		At3g20670	histone H2A, putative strong similarity to histone H2A GB:AAF64418 GI:7595337 from Arabidopsis thaliana, Triticum aestivum GI:536892; contains Pfam profile PF00125 Core histone H2A/H2B/H3/H4
A010670_01	0	0.219	-0.725		At3g08030	expressed protein contains Pfam profile PF04862: Protein of unknown function, DUF642
A010750_01	0	0.195	-0.428		At3g49220	pectinesterase family protein contains Pfam profile: PF01095 pectinesterase
A010846_01	0	0.088	-0.279		At3g13480	expressed protein ; expression supported by MPSS
A010878_01	0	-0.302	-1.027		At3g50660	steroid 22-alpha-hydroxylase (CYP90B1) (DWF4) identical to gi:2935342
A010916_01	0	-0.036	-0.503		At3g24530	AAA-type ATPase family protein / ankyrin repeat family protein contains Pfam profiles: PF00023 ankyrin repeat, PF00004 ATPase family associated with various cellular activities (AAA)
A010961_01	0	-0.355	-0.717		At3g59140	ABC transporter family protein putative multi resistance protein mrp - Arabidopsis thaliana, EMBL:ATMRPPROT
A011065_01	0	-0.171	-0.516		At3g16800	protein phosphatase 2C, putative / PP2C, putative similar to protein phosphatase-2C GB:AAC36699 from [Mesembryanthemum crystallinum]
A011116_01	0	-0.006	-1.192		At3g29030	expansin, putative (EXP5) identical to expansin At-EXP5 GB:AAB38071 from [Arabidopsis thaliana]; alpha-expansin gene family, PMID:11641069
A011147_01	0	-0.239	-0.558		At3g16290	FtsH protease, putative contains similarity to cell division protein FtsH GI:1652085 from [Synechocystis sp. PCC 6803]
A011309_01	0	0.009	-0.444		At3g59320	integral membrane protein, putative contains Pfam profile PF00892: Integral membrane protein; identical to anthocyanin-related membrane protein 2 (GI:16416385) [Arabidopsis thaliana]
A011351_01	0	0.088	-0.328		At3g25717	expressed protein
A011419_01	0	-0.037	-0.651		At3g05180	GDSL-motif lipase/hydrolase family protein similar to early nodulin ENOD8 [Medicago sativa] GI:304037, elicitor-induced glycoprotein iEP4 [Daucus carota] GI:1911765, lanatoside 15'-O-acetylesterase [Digitalis lanata] GI:3688284; contains InterPro Entry IP
A011536_01	0	-0.137	-0.723		At3g49810	U-box domain-containing protein contains Pfam profile PF04564: U-box domain
A011596_01	0	-0.188	-0.407		At3g44620	low molecular weight phosphotyrosine protein phosphatase family protein contains Pfam profile: PF01451 low molecular weight phosphotyrosine protein phosphatase
A011769_01	0	-0.205	-0.772		At3g62820	invertase/pectin methylesterase inhibitor family protein low similarity to pectinesterase from Arabidopsis thaliana SP|Q43867, Lycopersicon esculentum SP|Q43143; contains Pfam profile PF04043: Plant invertase/pectin methylesterase inhibitor
A011779_01	0	-0.168	-0.437		At3g24030	hydroxyethylthiazole kinase family protein contains Pfam profile: PF02110 hydroxyethylthiazole kinase family
A011797_01	0	-0.056	-0.752		At3g47510	expressed protein
A011861_01	0	-0.035	-0.327		At3g54820	aquaporin, putative similar to plasma membrane aquaporin GI:3551133 from [Raphanus sativus]
A011888_01	0	-0.188	-0.535		At3g61130	glycosyl transferase family 8 protein contains Pfam profile: PF01501 glycosyl transferase family 8
A012029_01	0	0.164	-0.34		At3g02570	phosphomannose isomerase type I family protein contains Pfam profile: PF01238 phosphomannose isomerase type I
A012118_01	0	0.157	-0.461		At3g18710	U-box domain-containing protein similar to immediate-early fungal elicitor protein CMPG1 [Petroselinum crispum] GI:14582200; contains Pfam profile PF04564: U-box domain
A012188_01	0	-0.215	-1.016		At3g02250	expressed protein contains Pfam PF03138: Plant protein family. The function of this family of plant proteins is unknown; previously annotated as 'auxin-independent growth promoter -related' based on similarity to axi 1 protein (GB:X80301) (GI:559920) from
A012213_01	0	-0.289	-0.782		At3g12120	omega-6 fatty acid desaturase, endoplasmic reticulum (FAD2) / delta-12 desaturase identical to omega-6 fatty acid desaturase, endoplasmic reticulum (FAD2) SP:P46313 [Arabidopsis thaliana (Mouse-ear cress)] (Plant Cell 6:147-158(1994))
A012331_01	0	-0.023	-0.468		At3g16240	delta tonoplast integral protein (delta-TIP) identical to delta tonoplast integral protein (delta-TIP) (GI:9279707)(GB:U39485) [Arabidopsis thaliana] (Plant Cell 8 (4), 587-599 (1996))
A012335_01	0	-0.206	-0.806		At3g57540	remorin family protein contains Pfam domain, PF03763: Remorin, C-terminal region
A012357_01	0	0.04	-0.277		At3g18040	mitogen-activated protein kinase, putative / MAPK, putative (MPK9) identical to ATMPK9 [Arabidopsis thaliana] gi|7106544|dbj|BAA92223; mitogen-activated protein kinase (MAPK), PMID:12119167; similar to blast and wounding induced mitogen-activated protein
A012700_01	0	0.122	-0.504		At3g52500	aspartyl protease family protein contains Pfam PF00026: eukaryotic aspartyl protease
A012772_01	0	-0.014	-0.304		At3g26720	glycosyl hydrolase family 38 protein similar to lysosomal alpha-mannosidase GI:3522867 from [Homo sapiens]
A012776_01	0	-0.153	-0.739		At3g48610	phosphoesterase family protein low similarity to SP|P95246 Phospholipase C 2 precursor (EC 3.1.4.3) {Mycobacterium tuberculosis}; contains Pfam profile PF04185: Phosphoesterase family
A012796_01	0	-0.249	-0.998		At3g61820	aspartyl protease family protein contains Pfam domain, PF00026: eukaryotic aspartyl protease
A012798_01	0	0.267	-0.712		At3g62950	glutaredoxin family protein contains INTERPRO Domain IPR002109, Glutaredoxin (thioltransferase)
A012860_01	0	-0.362	-0.879		At4g37930	glycine hydroxymethyltransferase / serine hydroxymethyltransferase / serine/threonine aldolase (SHM1) identical to serine hydroxymethyl transferase [Arabidopsis thaliana] GI:6899945
A012978_01	0	-0.366	-0.711		At4g35920	expressed protein contains Pfam profile PF04749: Protein of unknown function, DUF614; isoform contains AT-acceptor splice site at intron 8
A013038_01	0	-0.137	-0.534		At4g04340	early-responsive to dehydration protein-related / ERD protein-related similar to ERD4 protein (early-responsive to dehydration stress) [Arabidopsis thaliana] GI:15375406; contains Pfam profile PF02714: Domain of unknown function DUF221
A013101_01	0	-0.188	-0.431		At4g18340	glycosyl hydrolase family 17 protein similar to elicitor inducible chitinase Nt-SubE76 GI:11071974 from [Nicotiana tabacum]
A013271_01	0	0.055	-0.252		At4g31600	UDP-glucuronic acid/UDP-N-acetylgalactosamine transporter-related contains weak similarity to UDP-glucuronic acid/UDP-N-acetylgalactosamine transporter (UDP- GlcA/UDP-GalNAc transporter) (Swiss-Prot:Q9NTN3) [Homo sapiens]
A013317_01	0	-0.176	-0.615		At4g33220	pectinesterase family protein contains Pfam profile: PF01095 pectinesterase
A013322_01	0	-0.198	-0.493		At4g37590	phototropic-responsive NPH3 family protein contains NPH3 family domain, Pfam:PF03000
A013355_01	0	-0.043	-0.439		At4g18760	leucine-rich repeat family protein contains leucine rich-repeat domains Pfam:PF00560, INTERPRO:IPR001611
A013372_01	0	-0.057	-0.198		At4g13200	expressed protein hypothetical protein sll1769 - Synechocystis sp,PID:d1018406
A013399_01	0	-0.121	-0.545		At4g11660	heat shock factor protein 7 (HSF7) / heat shock transcription factor 7 (HSTF7) identical to heat shock factor protein 7 (HSF7) SP:Q9T0D3 from [Arabidopsis thaliana]
A013608_01	0	-0.035	-0.587		At4g29310	expressed protein
A013615_01	0	-0.027	-0.329		At4g30510	transport protein-related weak similarity to Gsa12p [Pichia pastoris] GI:18307769; contains 1 WD-40 repeat (PF00400); similar to several hypothetical proteins
A013670_01	0	-0.17	-0.507		At4g22280	F-box family protein contains Pfam profile PF00646: F-box domain
A013700_01	0	-0.051	-0.376		At4g18280	glycine-rich cell wall protein-related glycine-rich protein 1.0 precursor, Phaseolus vulgaris, PIR1:S01821
A013767_01	0	0.182	-0.653		At4g24130	expressed protein contains Pfam profile PF04398: Protein of unknown function, DUF538
A013964_01	0	0.166	-0.577		At4g37450	arabinogalactan-protein (AGP18) identical to gi_11935088_gb_AAG41964
A014040_01	0	0.811	-1.374		At4g11320	cysteine proteinase, putative contains similarity to cysteine proteinase RD21A (thiol protease) GI:435619, SP:P43297 from [Arabidopsis thaliana]
A014163_01	0	-0.136	-0.321		At4g18400	expressed protein
A014339_01	0	-0.142	-0.534		At4g20870	fatty acid hydroxylase, putative similar to fatty acid hydroxylase Fah1p GB:AF021804 GI:2736147 from [Arabidopsis thaliana]
A014385_01	0	0.016	-0.227		At4g17300	asparaginyl-tRNA synthetase, chloroplast, mitochondrial / asparagine-tRNA ligase / AsnRS (SYNO) nearly identical to SP|O48593
A014389_01	0	0.081	-0.311		At4g39990	Ras-related GTP-binding protein, putative similar to GTP-binding protein GI:303738 from [Pisum sativum]
A014515_01	0	-0.177	-0.73		At4g04330	expressed protein
A014611_01	0	-0.04	-0.303		At4g01070	UDP-glucoronosyl/UDP-glucosyl transferase family protein contains Pfam profile: PF00201 UDP-glucoronosyl and UDP-glucosyl transferase
A014633_01	0	-0.365	-0.571		At4g14360	dehydration-responsive protein-related similar to early-responsive to dehydration stress ERD3 protein [Arabidopsis thaliana] GI:15320410; contains Pfam profile PF03141: Putative methyltransferase
A014695_01	0	-0.032	-0.421		At4g35320	expressed protein predicted protein, Arabidopsis thaliana
A014720_01	0	0.043	-0.413		At4g38740	peptidyl-prolyl cis-trans isomerase / cyclophilin / rotamase / cyclosporin A-binding protein (ROC1) identical to SP|P34790 Peptidyl-prolyl cis-trans isomerase (EC 5.2.1.8) (PPIase) (Rotamase) (Cyclophilin) (Cyclosporin A-binding protein) {Arabidopsis thal
A014729_01	0	-0.109	-0.638		At4g21380	S-locus protein kinase, putative (ARK3) identical to PIR|T05180|T05180 S-receptor kinase ARK3 precursor - [Arabidopsis thaliana]
A014789_01	0	-0.008	-0.163		At4g23670	major latex protein-related / MLP-related low similarity to major latex protein {Papaver somniferum}[GI:294060] contains Pfam profile PF00407: Pathogenesis-related protein Bet v I family
A014830_01	0	0.121	-0.537		At4g30520	leucine-rich repeat family protein / protein kinase family protein contains Pfam domains PF00560: Leucine Rich Repeat and PF00069: Protein kinase domain
A015082_01	0	-0.364	-0.683		At4g32590	ferredoxin-related contains Pfam profile: PF00111 2Fe-2S iron-sulfur cluster binding domain
A015249_01	0	-0.087	-0.464		At4g35060	heavy-metal-associated domain-containing protein / copper chaperone (CCH)-related low similarity to copper homeostasis factor [GI:3168840][PMID:9701579]; similar to farnesylated proteins GMFP7 [Glycine max][GI:4097573] and ATFP6 [GI:4097553]; contains hea
A015345_01	0	-0.123	-0.617		At4g00870	basic helix-loop-helix (bHLH) family protein similar to the myc family of helix-loop-helix transcription factors; contains Pfam profile PF00010: Helix-loop-helix DNA-binding domain; PMID: 12679534
A015356_01	0	-0.156	-0.431		At4g30810	serine carboxypeptidase S10 family protein similar to serine-type carboxypeptidase (SP:P55748) [Hordeum vulgare]
A015419_01	0	0.072	-0.486		At4g01900	P II nitrogen sensing protein (GLB I) identical to P II nitrogen sensing protein GLB I (GI:7268574) [Arabidopsis thaliana]; similar to nitrogen regulatory protein P-II (PII signal transducing protein) (SP:O30794) {Nostoc punctiforme}
A015591_01	0	-0.079	-0.697		At5g15800	developmental protein SEPALLATA1 / floral homeotic protein (AGL2) (SEP1) identical to developmental protein SEPALLATA1 / floral homeotic protein (AGL2 / SEP1) SP:P29382 from [Arabidopsis thaliana]
A015662_01	0	-0.523	-0.696		At5g38140	histone-like transcription factor (CBF/NF-Y) family protein similar to CCAAT-binding transcription factor subunit AAB-1 (GI:2583171) [Neurospora crassa]; contains a CBF/NF-Y subunit signature (PDOC00578) presernt in members of histone-like transcription f
A015762_01	0	-0.082	-0.484		At5g13690	alpha-N-acetylglucosaminidase family / NAGLU family contains Pfam profile: PF05089 alpha-N-acetylglucosaminidase (NAGLU)
A015799_01	0	-0.514	-0.812		At5g65890	ACT domain-containing protein (ACR1) contains Pfam profile ACT domain PF01842
A015908_01	0	-0.015	-0.423		At5g63780	zinc finger (C3HC4-type RING finger) family protein contains Pfam profile: PF00097 zinc finger, C3HC4 type (RING finger)
A015938_01	0	0.465	-1.029		At5g22500	acyl CoA reductase, putative / male-sterility protein, putative similar to acyl CoA reductase [Simmondsia chinensis] GI:5020215; contains Pfam profile PF03015: Male sterility protein; identical to cDNA male sterility 2-like protein GI:1491614
A016056_01	0	-0.147	-0.625		At5g50210	quinolinate synthetase A-related contains weak similarity to Swiss-Prot:P11458 quinolinate synthetase A [Escherichia coli]
A016125_01	0	0.135	-0.372		At5g60860	Ras-related GTP-binding protein, putative similar to GTP-binding protein GI:303742 from [Pisum sativum]
A016215_01	0	0.186	-0.346		At5g15320	expressed protein predicted protein, Arabidopsis thaliana
A016238_01	0	-0.237	-0.809		At5g54160	quercetin 3-O-methyltransferase 1 / flavonol 3-O-methyltransferase 1 / caffeic acid/5-hydroxyferulic acid O-methyltransferase (OMT1) identical to O-methyltransferase 1 [Arabidopsis thaliana][GI:2781394], SP|Q9FK25 Quercetin 3-O-methyltransferase 1 (EC 2.1
A016256_01	0	0.009	-0.992		At5g47240	MutT/nudix family protein similar to SP|P53370 Nucleoside diphosphate-linked moiety X motif 6 {Homo sapiens}; contains Pfam profile PF00293: NUDIX domain
A016402_01	0	0.098	-1.104		At5g10180	sulfate transporter identical to sulfate transporter [Arabidopsis thaliana] GI:2114104
A016473_01	0	0.117	-0.36		At5g01200	myb family transcription factor contains PFAM profile: PF00249 myb-like DNA binding domain
A016509_01	0	-0.261	-0.616		At5g16940	expressed protein contains Pfam profile PF04828: Protein of unknown function (DUF636)
A016531_01	0	-0.496	-0.689		At5g17520	root cap 1 (RCP1) identical to GI:6137138
A016553_01	0	-0.203	-0.438		At5g15440	circadian clock coupling factor-related similar to circadian clock coupling factor ZGT [Nicotiana tabacum] GI:14210079
A016567_01	0	-0.397	-0.658		At5g39790	5'-AMP-activated protein kinase beta-1 subunit-related contains similarity to Swiss-Prot:P80387 5'-AMP-activated protein kinase, beta-1 subunit (AMPK beta-1 chain) (AMPKb) (40 kDa subunit) [Sus scrofa]
A016578_01	0	-0.024	-0.53		At5g23860	tubulin beta-8 chain (TUB8) (TUBB8) identical to SP|P29516 Tubulin beta-8 chain {Arabidopsis thaliana}; supporting cDNA gi|15451225|gb|AY054693.1|
A016638_01	0	-0.174	-0.558		At5g03880	expressed protein
A016644_01	0	-0.101	-0.762		At5g18240	myb family transcription factor contains Pfam profile: PF00249 myb-like DNA-binding domain
A016682_01	0	-0.295	-0.551		At5g54660	heat shock protein-related contains weak similarity to 17.6 kDa class I heat shock protein (HSP 17.6) (Swiss-Prot:P13853) [Arabidopsis thaliana]
A016836_01	0	0.276	-0.893		At5g49630	amino acid permease 6 (AAP6) identical to amino acid permease 6 (AAP6) [Arabidopsis thaliana] GI:1769887
A016839_01	0	-0.065	-0.653		At5g57520	zinc finger (C2H2 type) family protein (ZFP2) identical to zinc finger protein 2 (ZFP2) GI:790674 from [Arabidopsis thaliana]; contains Pfam domain, PF00096: Zinc finger, C2H2 type
A016874_01	0	-0.284	-0.895		At5g11790	Ndr family protein similar to SP|O23969 Pollen specific protein SF21 {Helianthus annuus}; contains Pfam profile PF03096: Ndr family
A016877_01	0	-0.082	-0.7		At5g65850	F-box family protein
A016951_01	0	-0.03	-0.704		At5g49660	leucine-rich repeat transmembrane protein kinase, putative contains leucine rich repeat (LRR) domains, Pfam:PF00560; contains protein kinase domain, Pfam:PF00069
A017094_01	0	0.108	-0.633		At5g59000	zinc finger (C3HC4-type RING finger) family protein contains Pfam profile: PF00097 zinc finger, C3HC4 type (RING finger) ;contains PROSITE PS00190: Cytochrome c family heme-binding site signature
A017107_01	0	-0.044	-0.435		At5g66850	protein kinase family protein contains Pfam domain, PF00069: Protein kinase domain; identical to cDNA MAP3K gamma protein kinase GI:2315152
A017160_01	0	0.01	-0.311		At5g57800	CER1 protein, putative (WAX2) similar to maize glossy1 homolog GI:2213643 from [Oryza sativa]; contains Pfam profile PF01598: Sterol desaturase
A017186_01	0	-0.312	-0.905		At5g43870	expressed protein
A017235_01	0	-0.457	-0.783		At5g23120	photosystem II stability/assembly factor, chloroplast (HCF136) identical to SP|O82660 Photosystem II stability/assembly factor HCF136, chloroplast precursor {Arabidopsis thaliana}
A017240_01	0	-0.231	-0.484		At5g45030	expressed protein
A017262_01	0	-0.265	-0.694		At5g44210	ERF domain protein 9 (ERF9) identical to ERF domain protein 9 GI:11414988 from [Arabidopsis thaliana]
A017361_01	0	-0.1	-0.604		At5g47870	expressed protein
A017399_01	0	-0.015	-0.309		At5g66450	phosphatidic acid phosphatase-related / PAP2-related contains Pfam profile PF01569: PAP2 superfamily
A017653_01	0	0.043	-0.2		At5g53590	auxin-responsive family protein similar to indole-3-acetic acid induced protein ARG7 (SP:P32295) [Vigna radiata]
A017688_01	0	-0.319	-0.73		At5g57700	BNR/Asp-box repeat family protein contains Pfam PF02012: BNR/Asp-box repeat
A017806_01	0	-0.3	-0.731		At5g66580	expressed protein
A017813_01	0	0.048	-0.358		At5g03300	adenosine kinase 2 (ADK2) contains Pfam profile: PF00294 pfkB family carbohydrate kinase; identical to cDNA adenosine kinase 2 (ADK2) GI:12017763
A018156_01	0	-0.037	-0.436		At5g57350	ATPase 3, plasma membrane-type / proton pump 3 nearly identical to SP|P20431 ATPase 3, plasma membrane-type (EC 3.6.3.6) (Proton pump 3) {Arabidopsis thaliana}; contains InterPro accession IPR001757: ATPase, E1-E2 type
A018428_01	0	-0.026	-0.6		At5g59480	haloacid dehalogenase-like hydrolase family protein low similarity to SP|P53078 SSM1 protein {Saccharomyces cerevisiae}; contains InterPro accession IPR005834: Haloacid dehalogenase-like hydrolase
A018510_01	0	-0.326	-0.505		At5g14970	expressed protein
A018776_01	0	-0.051	-0.316		At5g46190	KH domain-containing protein strong similarity to unknown protein (pir||T04533)
A018778_01	0	0.605	-1.279		At5g12940	leucine-rich repeat family protein contains leucine rich-repeat domains Pfam:PF00560, INTERPRO:IPR001611
A018793_01	0	-0.337	-0.988		At5g48460	fimbrin-like protein, putative strong similarity to fimbrin-like protein AtFim2 [Arabidopsis thaliana] GI:2737926; contains Pfam profile PF00307: Calponin homology (CH) domain
A018867_01	0	-0.163	-0.78		At5g56600	profilin 5 (PRO5) (PRF3) identical to SP|Q9FE63 Profilin 5 {Arabidopsis thaliana}
A018892_01	0	0.03	-0.8		At5g50720	ABA-responsive protein (HVA22e) identical to AtHVA22e [Arabidopsis thaliana] GI:11225589
A018932_01	0	-0.268	-0.551		At5g04140	glutamate synthase (GLU1) / ferredoxin-dependent glutamate synthase (Fd-GOGAT 1) identical to ferredoxin-dependent glutamate synthase precursor [Arabidopsis thaliana] GI:3869251
A019050_01	0	-0.209	-0.552		At5g27560	expressed protein hypothetical protein slr1702 - Synechocystis sp., PIR:S75312
A019197_01	0	0	-0.443		At5g10850	expressed protein
A019272_01	0	0.173	-0.496		At5g66420	expressed protein
A019358_01	0	-0.201	-0.795		At5g13400	proton-dependent oligopeptide transport (POT) family protein contains Pfam profile: PF00854 POT family
A019453_01	0	-0.085	-0.868		At1g19050	two-component responsive regulator / response regulator 7 (ARR7) identical to response regulator 7 GI:3953603 from [Arabidopsis thaliana]
A019487_01	0	-0.034	-0.287		At3g57030	strictosidine synthase family protein similar to strictosidine synthase [Rauvolfia serpentina][SP|P15324]
A019642_01	0	-0.163	-0.639		At5g48880	acetyl-CoA C-acyltransferase 1 / 3-ketoacyl-CoA thiolase 1 (PKT1) identical to 3-keto-acyl-CoA-thiolase 1 [Arabidopsis thaliana] GI:3169568
A019684_01	0	-0.498	-0.75		At5g52970	thylakoid lumen 15.0 kDa protein SP:Q9LVV5; similar to unknown protein (pir |S77462)
A019744_01	0	-0.029	-0.329		At5g15050	glycosyltransferase family 14 protein / core-2/I-branching enzyme family protein contains Pfam profile: PF02485 Core-2/I-Branching enzyme
A019746_01	0	-0.121	-0.567		At5g08370	alpha-galactosidase, putative / melibiase, putative / alpha-D-galactoside galactohydrolase, putative similar to alpha-galactosidase SP:Q42656 from [Coffea arabica]
A019783_01	0	-0.053	-0.256		At1g68370	gravity-responsive protein / altered response to gravity protein (ARG1) identical to Altered Response to Gravity [Arabidopsis thaliana] GI:4249662; contains Pfam profile PF00226 DnaJ domain
A019819_01	0	-0.058	-0.907		At2g41880	guanylate kinase 1 (GK-1) identical to guanylate kinase (GK-1) [Arabidopsis thaliana] gi|7861795|gb|AAF70408
A019828_01	0	-0.33	-0.799		At2g29390	sterol 4-alpha-methyl-oxidase 1 (SMO1) nearly identical to sterol 4-alpha-methyl-oxidase GI:16973469 from [Arabidopsis thaliana]; identical to cDNA sterol 4-alpha-methyl-oxidase (SMO) partial cds, GI:16973431
A019839_01	0	-0.048	-1.106		At2g30010	expressed protein
A019849_01	0	-0.366	-0.878		At2g37585	glycosyltransferase family 14 protein / core-2/I-branching enzyme family protein contains Pfam profile: PF02485 Core-2/I-Branching enzyme
A019860_01	0	-0.144	-0.673		At2g27820	prephenate dehydratase family protein
A019868_01	0	-0.114	-0.705		At2g36050	ovate protein-related contains TIGRFAM TIGR01568 : uncharacterized plant-specific domain TIGR01568
A019884_01	0	-0.098	-0.62		At2g12400	expressed protein
A019964_01	0	0.082	-0.784		At1g74660	zinc finger homeobox family protein / ZF-HD homeobox family protein contains Pfam PF04770: ZF-HD protein dimerisation region; contains TIGRFAM TIGR01566: ZF-HD homeobox protein Cys/His-rich dimerization domain; similar to ZF-HD homeobox protein (GI:133740
A019999_01	0	-0.127	-0.741		At3g10720	pectinesterase, putative contains similarity to pectinesterase from Vitis vinifera GI:15081598, Prunus persica SP|Q43062; contains Pfam profile PF01095 pectinesterase
A020016_01	0	0	-1.11		At4g17460	homeobox-leucine zipper protein 1 (HAT1) / HD-ZIP protein 1 identical to Homeobox-leucine zipper protein HAT1 (SP:P46600) [Arabidopsis thaliana]
A020035_01	0	-0.026	-0.703		At5g06870	polygalacturonase inhibiting protein 2 (PGIP2) identical to polygalacturonase inhibiting protein 2 (PGIP2) [Arabidopsis thaliana] gi|7800201|gb|AAF69828; contains leucine rich-repeat (LRR) domains Pfam:PF00560, INTERPRO:IPR001611
A020050_01	0	-0.137	-0.686		At3g53900	uracil phosphoribosyltransferase, putative / UMP pyrophosphorylase, putative / UPRTase, putative similar to SP|P50926 Uracil phosphoribosyltransferase (EC 2.4.2.9) (UMP pyrophosphorylase) (UPRTase) {Lactococcus lactis}; contains Pfam profile PF00156: Phos
A020136_01	0	0.043	-0.271		At3g20310	ethylene-responsive element-binding family protein similar to SP|O80339 Ethylene responsive element binding factor 3 (AtERF3) {Arabidopsis thaliana}; contains Pfam profile PF00847: AP2 domain
A020169_01	0	0.078	-0.265		At2g34470	urease accessory protein (UREG) identical to urease accessory protein UREG GI:4324678 from [Arabidopsis thaliana]; contains Pfam profile: PF01495 HypB/UreG nucleotide-binding domain
A020218_01	0	-0.012	-0.552		At4g34560	expressed protein
A020222_01	0	-0.244	-0.732		At1g49750	leucine-rich repeat family protein contains leucine-rich repeats, Pfam:PF00560
A020246_01	0	-0.293	-0.738		At3g15680	zinc finger (Ran-binding) family protein contains Pfam domain, PF00641: Zn-finger in Ran binding protein and others
A020258_01	0	0.141	-0.964		At5g22630	prephenate dehydratase family protein contains Pfam profile PF00800: prephenate dehydratase
A020291_01	0	-0.015	-0.631		At3g12780	phosphoglycerate kinase, putative similar to SP|P41758 Phosphoglycerate kinase, chloroplast precursor (EC 2.7.2.3) {Chlamydomonas reinhardtii}; contains Pfam profile PF00162: phosphoglycerate kinase
A020301_01	0	-0.13	-0.327		At1g30200	F-box family protein contains Pfam PF00646: F-box domain; similar to hypothetical protein GI:2832643 from [Arabidopsis thaliana]
A020302_01	0	0.165	-0.344		At3g52470	harpin-induced family protein / HIN1 family protein / harpin-responsive family protein similar to harpin-induced protein hin1 ( GI:1619321) [Nicotiana tabacum]
A020452_01	0	-0.241	-0.882		At3g13520	arabinogalactan-protein (AGP12) identical to gi|10880501|gb|AAG24280
A020495_01	0	0.004	-0.763		At4g34760	auxin-responsive family protein auxin-induced protein X15, Glycine max, PIR2:JQ1097
A020594_01	0	-0.196	-0.836		At4g23690	disease resistance-responsive family protein / dirigent family protein similar to disease resistance response protein 206-d [Pisum sativum] gi|508844|gb|AAB18669; similar to dirigent protein [Forsythia x intermedia] gi|6694693|gb|AAF25357
A020643_01	0	-0.211	-0.558		At4g28050	senescence-associated protein, putative similar to senescence-associated protein 5 [Hemerocallis hybrid cultivar] gi|3551954|gb|AAC34855
A020694_01	0	-0.123	-0.63		At1g70820	phosphoglucomutase, putative / glucose phosphomutase, putative similar to phosphoglucomutase GI:534981 from [Spinacia oleracea], phosphomannomutase [Pseudomonas aeruginosa] GI:150994; contains InterPro accession IPR006352: Phosphoglucosamine mutase
A020711_01	0	-0.306	-0.511		At5g05820	phosphate translocator-related low similarity to phosphoenolpyruvate/phosphate translocator precursor [Mesembryanthemum crystallinum] GI:9295275, glucose-6-phosphate/phosphate-translocator precursor [Zea mays] GI:2997589; contains Pfam profile PF00892: In
A020872_01	0	-0.025	-0.548		At4g17050	expressed protein
A020879_01	0	-0.441	-0.792		At5g48790	expressed protein
A020900_01	0	-0.008	-0.406		At1g20090	Rac-like GTP-binding protein (ARAC4) / Rho-like GTP-binding protein (ROP2) identical to SP:Q38919 RAC-like GTP binding protein ARAC4 (GTP binding protein ROP2) [Arabidopsis thaliana], Rho-like GTP binding protein [Arabidopsis thaliana] GI:2654009
A020930_01	0	-0.042	-0.582		At1g48750	protease inhibitor/seed storage/lipid transfer protein (LTP) family protein similar to TED4 [Zinnia elegans] GI:493721; contains Pfam protease inhibitor/seed storage/LTP family domain PF00234
A021026_01	0	0.11	-0.558		At5g65730	xyloglucan:xyloglucosyl transferase, putative / xyloglucan endotransglycosylase, putative / endo-xyloglucan transferase, putative similar to endo-xyloglucan transferase GI:2244732 from [Gossypium hirsutum]
A021037_01	0	-0.416	-0.809		At4g12420	multi-copper oxidase, putative (SKU5) identical to multi-copper oxidase-related protein (SKU5)(GI:18158154) [Arabidopsis thaliana]; similar to pollen-specific protein precursor - common tobacco, PIR2:S22495; contains Pfam profile: PF00394 Multicopper oxid
A021062_01	0	-0.276	-0.687		At3g53750	actin 3 (ACT3) identical to SP|P53493 Actin 3 {Arabidopsis thaliana}; supported by full-length cDNA: Ceres: 19581.
A021347_01	0	0.137	-0.454		At5g07580	ethylene-responsive element-binding family protein contains similarity to ethylene responsive element binding factor 5 (AtERF5) (Swiss-Prot:O80341) [Arabidopsis thaliana]; contains Pfam PF00847: AP2 domain
A021763_01	0	-0.374	-0.79		At1g68260	thioesterase family protein contains Pfam profile: PF03061: thioesterase family protein
A022027_01	0	0.069	-0.38		At2g35370	glycine cleavage system H protein 1, mitochondrial (GDCSH) (GCDH) identical to SP|P25855 Glycine cleavage system H protein 1, mitochondrial precursor {Arabidopsis thaliana}
A022122_01	0	-0.3	-0.875		At5g46240	inward rectifying potassium channel (KAT1) identical to K+ channel [Arabidopsis thaliana] gi|1165000|emb|CAA63601; Shaker-type channel (1P/6TM), PMID:11500563
A022275_01	0	-0.137	-0.541		At5g65700	leucine-rich repeat transmembrane protein kinase, putative
A022438_01	0	-0.286	-0.875		At4g38850	auxin-responsive protein / small auxin up RNA (SAUR-AC1) identical to GP:546362 small auxin up RNA {Arabidopsis thaliana}; belongs to auxin-induced (indole-3-acetic acid induced) protein family
A022549_01	0	-0.138	-0.545		At4g02420	lectin protein kinase, putative similar to receptor lectin kinase 3 [Arabidopsis thaliana] gi|4100060|gb|AAD00733; contains protein kinase domain, Pfam:PF00069; contains legume lectins alpha and beta domains, Pfam:PF00138 and Pfam:PF00139
A022814_01	0	-0.085	-0.387		At5g50400	calcineurin-like phosphoesterase family protein contains Pfam profile: PF00149 calcineurin-like phosphoesterase
A022932_01	0	0.022	-0.246		At5g49220	expressed protein
A022975_01	0	-0.229	-0.467		At5g53050	hydrolase, alpha/beta fold family protein contains Pfam profile PF00561: hydrolase, alpha/beta fold family
A023293_01	0	0.153	-0.576		At1g73020	expressed protein contains Pfam profile PF04547: Protein of unknown function, DUF590; expression supported by MPSS
A023477_01	0	-0.317	-0.872		At2g46160	zinc finger (C3HC4-type RING finger) family protein similar to RING-H2 zinc finger protein ATL6 [Arabidopsis thaliana] GI:4928403; contains Pfam profile PF00097: Zinc finger, C3HC4 type (RING finger)
A023630_01	0	0.049	-0.299		At2g31680	Ras-related GTP-binding protein, putative similar to GTP-binding protein GI:289370 from [Brassica napus]
A023830_01	0	-0.173	-0.949		At1g01390	UDP-glucoronosyl/UDP-glucosyl transferase family protein contains Pfam profile: PF00201 UDP-glucoronosyl and UDP-glucosyl transferase
A023984_01	0	-0.078	-0.321		At1g35330	zinc finger (C3HC4-type RING finger) family protein contains Pfam profile: PF00097: Zinc finger, C3HC4 type (RING finger)
A023988_01	0	0.075	-0.433		At1g52290	protein kinase family protein contains Pfam PF00069: Protein kinase domain
A024236_01	0	-0.063	-0.429		At2g45590	protein kinase family protein contains protein kinase domain, Pfam:PF00069
A024254_01	0	-0.065	-0.517		At2g41770	expressed protein contains Pfam domain PF03385: Protein of unknown function, DUF288
A024255_01	0	-0.033	-0.527		At2g16280	very-long-chain fatty acid condensing enzyme, putative similar to fatty acid condensing enzyme CUT1 GI:5001734 from [Arabidopsis thaliana]
A024273_01	0	0.176	-0.693		At1g04240	auxin-responsive protein / indoleacetic acid-induced protein 3 (IAA3) identical to SP|Q38822 Auxin-responsive protein IAA3 (Indoleacetic acid-induced protein 3) {Arabidopsis thaliana}; EST gb|T04296 comes from this gene
A024347_01	0	-0.022	-0.511		At5g06700	expressed protein strong similarity to unknown protein (emb|CAB82953.1)
A024464_01	0	-0.119	-0.426		At5g16570	glutamine synthetase, putative similar to glutamine synthetase, cytosolic isozyme (glutamate-- ammonia ligase) [Alfalfa] SWISS-PROT:P04078
A024481_01	0	-0.476	-0.88		At4g17340	major intrinsic family protein / MIP family protein contains Pfam profile: MIP PF00230
A024608_01	0	0.055	-0.351		At2g01910	microtubule associated protein (MAP65/ASE1) family protein low similarity to protein regulating cytokinesis 1 (PRC1) [Homo sapiens] GI:2865521; contains Pfam profile PF03999: Microtubule associated protein (MAP65/ASE1 family)
A024725_01	0	-0.272	-0.797		At5g50150	expressed protein strong similarity to unknown protein (gb|AAF04872.1) contains Pfam profile PF03080: Arabidopsis proteins of unknown function
A024920_01	0	1.69	-2.439		At4g37770	1-aminocyclopropane-1-carboxylate synthase, putative / ACC synthase, putative similar to 1-aminocyclopropane-1-carboxylate synthase, Arabidopsis thaliana, GI:940370 [S71174]
A025984_01	0	-0.054	-0.457		At1g20010	tubulin beta-5 chain (TUB5) nearly identical to SP|P29513 Tubulin beta-5 chain {Arabidopsis thaliana}
A200001_01	0	0.016	-0.451		At1g01540	protein kinase family protein contains protein kinase domain, Pfam:PF00069; contains serine/threonine protein kinase domain, INTERPRO:IPR002290
A200013_01	0	-0.139	-0.376		At1g13860	dehydration-responsive protein-related similar to early-responsive to dehydration stress ERD3 protein [Arabidopsis thaliana] GI:15320410; contains Pfam profile PF03141: Putative methyltransferase
A200095_01	0	0.324	-1.274		At4g14400	ankyrin repeat family protein contains ankyrin repeats, Pfam domain PF00023
A200108_01	0	0.144	-0.549		At4g25100	superoxide dismutase [Fe], chloroplast (SODB) / iron superoxide dismutase (FSD1) identical to Fe-superoxide dismutase [Arabidopsis thaliana] gi|166700|gb|AAA32791; supported by cDNA, Ceres:32935
A200114_01	0	0.253	-0.85		At4g29740	FAD-binding domain-containing protein / cytokinin oxidase family protein similar to cytokinin oxidase, Zea mays [gi:3882018] [gi:3441978]
A200246_01	0	0.057	-0.314		At1g04820	tubulin alpha-2/alpha-4 chain (TUA4) nearly identical to SP:P29510 Tubulin alpha-2/alpha-4 chain from [Arabidopsis thaliana]
A200268_01	0	0.34	-0.782		At1g06640	2-oxoglutarate-dependent dioxygenase, putative similar to 2A6 (GI:599622) and tomato ethylene synthesis regulatory protein E8 (SP|P10967); contains Pfam profile: PF00671 Iron/Ascorbate oxidoreductase family
A200350_01	0	0.048	-0.937		At1g11330	S-locus lectin protein kinase family protein contains Pfam domains, PF00954: S-locus glycoprotein family, PF00069: Protein kinase domain, and PF01453: Lectin (probable mannose binding)
A200373_01	0	0.223	-0.606		At1g12880	MutT/nudix family protein similar to diphosphoinositol polyphosphate phosphohydrolase [Homo sapiens] GI:3978224; contains Pfam profile PF00293: NUDIX domain
A200396_01	0	0.228	-0.417		At1g15120	ubiquinol-cytochrome C reductase complex 7.8 kDa protein, putative / mitochondrial hinge protein, putative similar to SP|P48504 Ubiquinol-cytochrome C reductase complex 7.8 kDa protein (EC 1.10.2.2) (Mitochondrial hinge protein) (CR7) {Solanum tuberosum};
A200502_01	0	-0.117	-0.87		At1g22335	expressed protein ; expression supported by MPSS
A200662_01	0	-0.257	-0.634		At1g36550	hypothetical protein weak similarity to gag-pol polyprotein [Zea mays] GI:22296822
A200686_01	0	-0.303	-0.637		At1g40133	hypothetical protein
A200762_01	0	0.306	-0.818		At1g48600	phosphoethanolamine N-methyltransferase 2, putative (NMT2) very similar to |PEM2_ARATH Putative phosphoethanolamine N-methyltransferase 2 (EC 2.1.1.103) (SP:Q944H0){Arabidopsis thaliana}; very similar to Halotolerance protein Hal3b (SP:P94063)[Arabidopsis
A200935_01	0	0.062	-0.451		At1g64200	vacuolar ATP synthase subunit E, putative / V-ATPase E subunit, putative / vacuolar proton pump E subunit, putative similar to SP|Q39258 Vacuolar ATP synthase subunit E (EC 3.6.3.14) (V-ATPase E subunit) (Vacuolar proton pump E subunit) {Arabidopsis thali
A201073_01	0	-0.136	-0.487		At1g78680	gamma-glutamyl hydrolase (GGH1) / gamma-Glu-X carboxypeptidase / conjugase identical to SP|O65355 Gamma-glutamyl hydrolase precursor (EC 3.4.19.9) (Gamma-Glu-X carboxypeptidase) (Conjugase) (GH) {Arabidopsis thaliana}
A201318_01	0	0.251	-0.648		At2g20515	expressed protein
A201340_01	0	-0.032	-0.893		At2g21880	Ras-related GTP-binding protein, putative similar to Ras family GTP-binding protein SP:Q43463 from [Glycine max]
A201362_01	0	-0.289	-0.959		At2g24390	avirulence-responsive protein-related / avirulence induced gene (AIG) protein-related similar to SP|P54121 AIG2 protein {Arabidopsis thaliana}
A201367_01	0	0.112	-0.283		At2g25420	transducin family protein / WD-40 repeat family protein contains Pfam PF00400: WD domain, G-beta repeat (3 repeats)
A201372_01	0	-0.375	-0.676		At2g25737	expressed protein contains Pfam profile: PF01925 domain of unknown function DUF81
A201588_01	0	-0.189	-0.991		At3g06035	expressed protein
A201826_01	0	-0.116	-0.645		At3g29370	expressed protein
A201948_01	0	0.179	-0.852		At3g44735	phytosulfokines-related contains similarities to phytosulfokines from [Arabidopsis thaliana]
A202048_01	0	0.185	-0.946		At4g00780	meprin and TRAF homology domain-containing protein / MATH domain-containing protein contains Pfam profile PF00917: MATH domain
A202291_01	0	-0.001	-0.554		At4g16240	hypothetical protein
A202418_01	0	-0.276	-0.783		At4g26540	protein kinase family protein Three false introns were added with non-consensus splice sites to circumenvent frameshifts likely due to sequencing errors; this is extremely unusual and is under investigation.
A202655_01	0	-0.099	-0.952		At5g18970	AWPM-19-like membrane family protein contains Pfam profile: PF05512 AWPM-19-like family
A202999_01	0	0.145	-0.7		At5g28150	expressed protein
A203291_01	0	-0.405	-0.847		At5g47730	SEC14 cytosolic factor, putative / polyphosphoinositide-binding protein, putative similar to polyphosphoinositide binding protein SEC14 homolog Ssh1p (GI:2739044) {Glycine max}
A203296_01	0	-0.002	-0.33		At5g48485	protease inhibitor/seed storage/lipid transfer protein (LTP) family protein contains Pfam protease inhibitor/seed storage/LTP family domain PF00234
A203303_01	0	-0.07	-0.559		At5g49555	amine oxidase-related contains Pfam profile PF01593: amine oxidase, flavin-containing
A203346_01	0	-0.047	-0.372		At5g57035	protein kinase family protein contains Pfam profile: PF00069 Eukaryotic protein kinase domain
A203349_01	0	0.242	-0.69		At5g57785	expressed protein
At30000192	0	-0.008	-0.484		At1g02720	glycosyl transferase family 8 protein low similarity to putative glycosyl transferase from Neisseria gonorrhoeae [GI:595812]; contains Pfam glycosyl transferase family 8 domain PF01501
At30000405	0	-0.14	-0.333		At1g04550	auxin-responsive protein / indoleacetic acid-induced protein 12 (IAA12) identical to SP|Q38830 Auxin-responsive protein IAA12 (Indoleacetic acid-induced protein 12) {Arabidopsis thaliana}
At30000740	0	-0.076	-0.533		At1g07440	tropinone reductase, putative / tropine dehydrogenase, putative similar to tropinone reductase SP:P50165 from [Datura stramonium]
At30000784	0	0.099	-0.249		At1g07770	40S ribosomal protein S15A (RPS15aA) identical to GB:AAA61608 from [Arabidopsis thaliana] (Plant Physiol. 106 (1), 401-402 (1994))
At30000956	0	-0.017	-0.959		At1g09200	histone H3 identical to histone H3 from Zea mays SP|P05203, Medicago sativa GI:166384, Encephalartos altensteinii SP|P08903, Pisum sativum SP|P02300; contains Pfam profile PF00125 Core histone H2A/H2B/H3/H4
At30001264	0	-0.072	-0.509		At1g11840	lactoylglutathione lyase, putative / glyoxalase I, putative highly similar to putative lactoylglutathione lyase SP:Q39366 from [Brassica oleracea]
At30001427	0	0.121	-0.465		At1g13280	allene oxide cyclase family protein similar to ERD12 [GI:15320414], allene oxide cyclase GI:8977961 from [Lycopersicon esculentum]; contains Pfam profile PF06351: Allene oxide cyclase
At30001883	0	0.013	-0.29		At1g17350	auxin-induced-related / indole-3-acetic acid induced-related similar to auxin-induced protein TGSAUR22 (GI:10185820) [Tulipa gesnerian]
At30002121	0	0.027	-0.416		At1g19570	dehydroascorbate reductase, putative similar to GB:BAA90672 from (Oryza sativa)
At30002388	0	-0.194	-0.408		At1g22140	expressed protein
At30003114	0	-0.473	-0.9		At1g29660	GDSL-motif lipase/hydrolase family protein low similarity to family II lipase EXL1 [Arabidopsis thaliana] GI:15054382; contains InterPro Entry IPR001087 Lipolytic enzyme, G-D-S-L family
At30003965	0	0.237	-0.402		At1g45688	expressed protein
At30003989	0	0.007	-0.52		At1g47290	3-beta hydroxysteroid dehydrogenase/isomerase family protein contains Pfam profile PF01073 3-beta hydroxysteroid dehydrogenase/isomerase domain; similar to NAD(P)-dependent steroid dehydrogenase from Homo sapiens [SP|Q15738], Mus musculus [SP|Q9R1J0]
At30004067	0	0.034	-0.478		At1g48040	protein phosphatase 2C-related / PP2C-related similar to protein phosphatase-2C GB:AAC36698 GI:3643085 from [Mesembryanthemum crystallinum]
At30004133	0	0.068	-0.333		At1g48610	AT hook motif-containing protein contains Pfam profile PF02178: AT hook motif
At30004158	0	-0.134	-0.346		At1g48860	3-phosphoshikimate 1-carboxyvinyltransferase, putative / 5-enolpyruvylshikimate-3-phosphate, putative / EPSP synthase, putative strong similarity to 5-enolpyruvylshikimate-3-phosphate (EPSP) synthase SP|P05466 from (Arabidopsis thaliana)
At30004274	0	-0.018	-0.367		At1g50010	tubulin alpha-2/alpha-4 chain (TUA2) identical to tubulin alpha-2/alpha-4 chain SP|P29510 GB:P29510 from [Arabidopsis thaliana]
At30004574	0	-0.253	-0.809		At1g52870	peroxisomal membrane protein-related contains weak similarity to Swiss-Prot:Q07066 22 kDa peroxisomal membrane protein [Rattus norvegicus]
At30004575	0	-0.106	-0.631		At1g52870	peroxisomal membrane protein-related contains weak similarity to Swiss-Prot:Q07066 22 kDa peroxisomal membrane protein [Rattus norvegicus]
At30005049	0	-0.292	-0.733		At1g57980	purine permease-related low similarity to purine permease [Arabidopsis thaliana] GI:7620007; contains Pfam profile PF03151: Domain of unknown function, DUF250
At30005619	0	-0.543	-0.821		At1g64150	expressed protein contains Pfam profile PF01169: Uncharacterized protein family UPF0016
At30005865	0	0.144	-0.918		At1g66430	pfkB-type carbohydrate kinase family protein contains Pfam profile: PF00294 pfkB family carbohydrate kinase
At30006345	0	0.073	-0.219		At1g70670	caleosin-related family protein similar to Ca+2-binding EF hand protein GB:AAB71227 [Glycine max]; contains Pfam profile PF05042: Caleosin related protein
At30006657	0	-0.35	-0.821		At1g73600	phosphoethanolamine N-methyltransferase 3, putative (NMT3) strong similarity to SP|Q9FR44 Phosphoethanolamine N-methyltransferase 1 (EC 2.1.1.103) (PEAMT 1) (AtNMT1) {Arabidopsis thaliana}; identical to SP|Q9C6B9 Putative phosphoethanolamine N-methyltrans
At30006958	0	-0.312	-0.881		At1g76410	zinc finger (C3HC4-type RING finger) family protein contains Pfam domain, PF00097: Zinc finger, C3HC4 type (RING finger)
At30007643	0	0.004	-0.593		At2g02450	no apical meristem (NAM) family protein contains Pfam PF02365: No apical meristem (NAM) domain
At30007644	0	0.141	-0.511		At2g02450	no apical meristem (NAM) family protein contains Pfam PF02365: No apical meristem (NAM) domain
At30007768	0	-0.193	-0.953		At2g03710	MADS-box protein (AGL3)
At30007909	0	-0.063	-0.604		At2g05260	lipase class 3 family protein contains Pfam profile PF01764: Lipase
At30008340	0	-0.323	-0.884		At2g14890	arabinogalactan-protein (AGP9) identical to gi|10880495|gb|AAG24277
At30008481	0	-0.053	-0.467		At2g16460	expressed protein
At30008482	0	0.017	-0.278		At2g16460	expressed protein
At30009108	0	-0.089	-0.742		At2g22122	expressed protein
At30009634	0	-0.075	-0.771		At2g27040	PAZ domain-containing protein / piwi domain-containing protein similar to SP|Q9QZ81 Eukaryotic translation initiation factor 2C 2 {Rattus norvegicus}; contains Pfam profiles PF02171: Piwi domain, PF02170: PAZ domain
At30010261	0	0.11	-0.257		At2g32580	expressed protein
At30010384	0	0.052	-0.315		At2g33600	cinnamoyl-CoA reductase family similar to cinnamoyl-CoA reductase from Pinus taeda [GI:17978649], Eucalyptus gunnii [GI:2058311]
At30010973	0	-0.196	-0.548		At2g38695	hypothetical protein
At30011420	0	0.251	-0.75		At2g42380	bZIP transcription factor family protein
At30011957	0	0.14	-0.557		At2g47060	serine/threonine protein kinase, putative similar to Pto kinase interactor 1 (Pti1)[Lycopersicon esculentum] gi|3668069|gb|AAC61805
At30011996	0	0.012	-0.226		At2g47440	DNAJ heat shock N-terminal domain-containing protein contains Pfam profiles PF00226: DnaJ domain, PF00515: TPR Domain; similar to GP|2104534|AF001308 (T10M13.11)
At30012003	0	-0.257	-0.823		At2g47485	expressed protein
At30012018	0	-0.034	-0.61		At2g47630	esterase/lipase/thioesterase family protein similar to monoglyceride lipase from [Homo sapiens] GI:14594904, [Mus musculus] GI:2632162; contains Interpro entry IPR000379
At30012186	0	-0.371	-0.69		At3g01810	expressed protein
At30012414	0	-0.485	-0.84		At3g03780	5-methyltetrahydropteroyltriglutamate--homocysteine methyltransferase, putative / vitamin-B12-independent methionine synthase, putative / cobalamin-independent methionine synthase, putative very strong similarity to SP|O50008 5-methyltetrahydropteroyltrig
At30012702	0	0.04	-0.662		At3g06150	expressed protein
At30012729	0	-0.003	-0.628		At3g06410	zinc finger (CCCH-type) family protein contains Pfam domain, PF00642: Zinc finger C-x8-C-x5-C-x3-H type (and similar)
At30012747	0	-0.07	-0.388		At3g06547	expressed protein
At30012781	0	-0.02	-0.996		At3g06770	glycoside hydrolase family 28 protein / polygalacturonase (pectinase) family protein weak similarity to polygalacturonase [Persea americana] GI:166951; contains PF00295: Glycosyl hydrolases family 28 (polygalacturonases)
At30012806	0	-0.092	-0.93		At3g07010	pectate lyase family protein similar to pectate lyase GP:14531296 from [Fragaria x ananassa]
At30013080	0	0.102	-0.469		At3g09800	clathrin adaptor complex small chain family protein contains Pfam profile: PF01217 clathrin adaptor complex small chain
At30013264	0	-0.213	-0.86		At3g11280	myb family transcription factor contains Pfam profile: PF00249 Myb-like DNA-binding domain
At30013319	0	-0.112	-0.553		At3g11700	beta-Ig-H3 domain-containing protein / fasciclin domain-containing protein contains Pfam profile PF02469: Fasciclin domain
At30014243	0	-0.019	-0.322		At3g19400	cysteine proteinase, putative non-consensus AT acceptor site at exon 3; contains similarity to cysteine protease CYP1 GI:2828252, TDI-65 GI:5726641 from [Lycopersicon esculentum]
At30014377	0	-0.011	-0.324		At3g20560	thioredoxin family protein contains Pfam profile PF00085: Thioredoxin
At30014988	0	0.327	-0.723		At3g26200	cytochrome P450 71B22, putative (CYP71B22) Identical to cytochrome P450 71B22 (SP:Q9LTM1)[Arabidopsis thaliana];contains Pfam profile: PF00067 cytochrome P450
At30015457	0	0.055	-0.32		At3g30841	2,3-biphosphoglycerate-independent phosphoglycerate mutase-related / phosphoglyceromutase-related contains weak similarity to 2,3-bisphosphoglycerate-independent phosphoglycerate mutase 1 (EC 5.4.2.1) (Phosphoglyceromutase 1) (BPG-independent PGAM 1) (aPG
At30015748	0	0.308	-0.585		At3g44480	disease resistance protein (TIR-NBS-LRR class), putative domain signature TIR-NBS-LRR exists, suggestive of a disease resistance protein.
At30015794	0	-0.26	-0.945		At3g44870	S-adenosyl-L-methionine:carboxyl methyltransferase family protein similar to defense-related protein cjs1 [Brassica carinata][GI:14009292][Mol Plant Pathol (2001) 2(3):159-169]
At30016000	0	0.243	-0.642		At3g46900	copper transporter, putative similar to SP|Q39065 Copper transporter 1 (COPT1) {Arabidopsis thaliana}; contains Pfam profile PF04145: Ctr copper transporter family
At30016075	0	-0.132	-0.476		At3g47560	esterase/lipase/thioesterase family protein low similarity to cinnamoyl ester hydrolase CinI [Butyrivibrio fibrisolvens] GI:1622732; contains Interpro entry IPR000379
At30016406	0	-0.102	-0.326		At3g50670	U1 small nuclear ribonucleoprotein 70 (U1-70k)
At30016640	0	-0.31	-1.011		At3g52720	carbonic anhydrase family protein low similarity to storage protein (dioscorin) [Dioscorea cayenensis] GI:433463; contains Pfam profile PF00194: Eukaryotic-type carbonic anhydrase
At30016897	0	-0.381	-0.794		At3g54890	chlorophyll A-B binding protein / LHCI type I (CAB) identical to chlorophyll A/B-binding protein [Arabidopsis thaliana] GI:16207; contains Pfam profile: PF00504 chlorophyll A-B binding protein
At30017677	0	0.207	-0.941		At3g62020	germin-like protein (GLP10) identical to germin-like protein subfamily 2 member 4 [SP|Q9M263]
At30017924	0	-0.41	-0.682		At4g00560	methionine adenosyltransferase regulatory beta subunit-related contains weak similarity to methionine adenosyltransferase regulatory beta subunit (GI:6815285) [Homo sapiens]
At30017925	0	-0.312	-0.62		At4g00560	methionine adenosyltransferase regulatory beta subunit-related contains weak similarity to methionine adenosyltransferase regulatory beta subunit (GI:6815285) [Homo sapiens]
At30017926	0	-0.307	-0.603		At4g00560	methionine adenosyltransferase regulatory beta subunit-related contains weak similarity to methionine adenosyltransferase regulatory beta subunit (GI:6815285) [Homo sapiens]
At30018234	0	0.067	-0.418		At4g03110	RNA-binding protein, putative similar to Etr-1 [Danio rerio] GI:7670536, BRUNO-like 6 RNA-binding protein [Homo sapiens] GI:15341327, CUG-BP and ETR-3 like factor 3 [Homo sapiens] GI:12746392; contains InterPro entry IPR000504: RNA-binding region RNP-1 (R
At30018843	0	-0.119	-0.324		At4g10840	kinesin light chain-related low similarity to kinesin light chain [Plectonema boryanum] GI:2645229; contains Pfam profile PF00515 TPR Domain
At30019457	0	0.036	-0.588		At4g16060	expressed protein
At30020178	0	0.046	-0.42		At4g22280	F-box family protein contains Pfam profile PF00646: F-box domain
At30020179	0	0.129	-0.37		At4g22280	F-box family protein contains Pfam profile PF00646: F-box domain
At30020247	0	-0.406	-0.706		At4g22890	expressed protein
At30020249	0	-0.429	-0.809		At4g22890	expressed protein
At30020421	0	-0.1	-0.541		At4g24350	phosphorylase family protein contains Pfam PF01048: Phosphorylase family
At30020454	0	-0.339	-0.604		At4g24620	glucose-6-phosphate isomerase, putative similar to glucose-6-phosphate isomerase [Spinacia oleracea] GI:3413511; contains Pfam profile PF00342: glucose-6-phosphate isomerase
At30020618	0	0.099	-0.268		At4g26070	mitogen-activated protein kinase kinase (MAPKK) (MKK1) (MEK1) identical to MEK1 [Arabidopsis thaliana] gi|2196704|gb|AAB97145; mitogen-activated protein kinase kinase (MAPKK) family, PMID:12119167
At30021262	0	-0.139	-0.597		At4g31550	WRKY family transcription factor contains Pfam profile: PF03106 WRKY DNA -binding domain
At30021264	0	-0.243	-0.688		At4g31550	WRKY family transcription factor contains Pfam profile: PF03106 WRKY DNA -binding domain
At30021375	0	-0.013	-0.355		At4g32460	expressed protein contains Pfam profile PF04862: Protein of unknown function, DUF642
At30021393	0	-0.167	-1.104		At4g32590	ferredoxin-related contains Pfam profile: PF00111 2Fe-2S iron-sulfur cluster binding domain
At30021394	0	-0.262	-0.804		At4g32590	ferredoxin-related contains Pfam profile: PF00111 2Fe-2S iron-sulfur cluster binding domain
At30022113	0	0.043	-0.267		At4g38860	auxin-responsive protein, putative auxin-induced protein 10A, Glycine max., PIR2:JQ1099
At30022178	0	-0.151	-0.683		At4g39350	cellulose synthase, catalytic subunit (Ath-A) identical to gi:2827141
At30022339	0	-0.309	-0.605		At5g01590	expressed protein
At30022694	0	-0.24	-0.703		At5g04820	ovate family protein 62% similar to ovate protein (GI:23429649) [Lycopersicon esculentum]; contains TIGRFAM TIGR01568 : uncharacterized plant-specific domain TIGR01568
At30022925	0	-0.258	-0.779		At5g06710	homeobox-leucine zipper protein 14 (HAT14) / HD-ZIP protein 14 contains similarity to homeodomain leucine zipper protein
At30023246	0	-0.447	-0.76		At5g09995	expressed protein
At30023293	0	-0.025	-0.959		At5g10400	histone H3 identical to several histone H3 proteins, including Zea mays SP|P05203, Medicago sativa GI:166384, Encephalartos altensteinii SP|P08903, Pisum sativum SP|P02300; contains Pfam profile PF00125 Core histone H2A/H2B/H3/H4
At30023406	0	-0.304	-0.762		At5g11420	expressed protein contains Pfam profile PF04862: Protein of unknown function, DUF642
At30023533	0	0.149	-0.386		At5g12950	expressed protein putative secreted protein SCF41.30c, Streptomyces coelicolor, EMBL:SCF41_30
At30023534	0	0.109	-0.372		At5g12960	expressed protein
At30023587	0	0.123	-0.545		At5g13460	calmodulin-binding family protein low similarity to SF16 protein [Helianthus annuus] GI:560150; contains Pfam profile PF00612: IQ calmodulin-binding motif
At30023788	0	-0.437	-0.901		At5g15310	myb family transcription factor contains PFAM profile: myb DNA-binding domain PF00249
At30023911	0	-0.254	-0.412		At5g16390	biotin carboxyl carrier protein 1 (BCCP1) identical to biotin carboxyl carrier protein of acetyl-CoA carboxylase precursor [Arabidopsis thaliana] gi|9759121|dbj|BAB09606
At30024635	0	-0.035	-1.159		At5g23360	GRAM domain-containing protein / ABA-responsive protein-related contains similarity to ABA-responsive protein in barley (GI:4103635) [Hordeum vulgare] [J. Exp. Bot. 50, 727-728 (1999); contains Pfam PF02893: GRAM domain]
At30024900	0	-0.044	-0.273		At5g25640	expressed protein ; expression supported by MPSS
At30025753	0	-0.166	-0.745		At5g39320	UDP-glucose 6-dehydrogenase, putative very strong similarity to SP|Q96558 UDP-glucose 6-dehydrogenase (EC 1.1.1.22) (UDP-Glc dehydrogenase) (UDP-GlcDH) (UDPGDH) {Glycine max}; contains Pfam profiles PF03721: UDP-glucose/GDP-mannose dehydrogenase family NA
At30025822	0	-0.038	-0.23		At5g39990	glycosyltransferase family 14 protein / core-2/I-branching enzyme family protein contains Pfam profile: PF02485 Core-2/I-Branching enzyme
At30026419	0	0.605	-1.074		At5g45280	pectinacetylesterase, putative similar to pectinacetylesterase precursor GI:1431629 from [Vigna radiata]
At30026420	0	0.448	-0.918		At5g45280	pectinacetylesterase, putative similar to pectinacetylesterase precursor GI:1431629 from [Vigna radiata]
At30026421	0	0.32	-0.847		At5g45280	pectinacetylesterase, putative similar to pectinacetylesterase precursor GI:1431629 from [Vigna radiata]
At30026756	0	-0.138	-0.575		At5g48150	phytochrome A signal transduction 1 (PAT1)
At30028077	0	0.104	-0.344		At5g59790	expressed protein
At30028317	0	0.033	-0.235		At5g61840	exostosin family protein contains Pfam profile: PF03016 exostosin family ;supported by cDNA gi|23821293|dbj|AB080693.1|;
At30028564	0	0.001	-0.416		At5g64080	protease inhibitor/seed storage/lipid transfer protein (LTP) family protein contains Pfam protease inhibitor/seed storage/LTP family domain PF00234
A004309_01	0	-0.067	-0.513		At1g67550	urease, putative / urea amidohydrolase, putative similar to SP|P07374 Urease (EC 3.5.1.5) (Urea amidohydrolase) {Canavalia ensiformis}; contains Pfam profile PF01979: Amidohydrolase family
A007573_01	0	0.001	-0.581		At2g41890	curculin-like (mannose-binding) lectin family protein / PAN domain-containing protein contains Pfam profiles: PF01453 lectin (probable mannose binding), PF00024 PAN domain
A009314_01	0	0.244	-0.482		At3g56230	speckle-type POZ protein-related contains Pfam PF00651 : BTB/POZ domain; similar to Speckle-type POZ protein (SP:O43791) [Homo sapiens]
A010898_01	0	0.024	-0.215		At3g53620	inorganic pyrophosphatase, putative [soluble] / pyrophosphate phospho-hydrolase, putative / PPase, putative similar to magnesium dependent soluble inorganic pyrophosphatase [Solanum tuberosum] GI:2706450; contains Pfam profile PF00719: inorganic pyrophosp
A014909_01	0	-0.047	-0.368		At4g13870	Werner Syndrome-like exonuclease (WEX) contains Pfam profile PF01612: 3'-5' exonuclease; identical to Werner Syndrome-like exonuclease [Arabidopsis thaliana] GP:28195109 gb:AAO33765
A022495_01	0	-0.062	-0.3		At4g11410	short-chain dehydrogenase/reductase (SDR) family protein contains INTERPRO family IPR002198 Short-chain dehydrogenase/reductase (SDR) superfamily
At30025408	0	0.197	-0.342		At5g35732	expressed protein
