# Supplementary material for: Virus Adaptation by Manipulation of Host's Gene Expression
Source: PLoS One. 2008 Jun 11;3(6):e2397. doi: 10.1371/journal.pone.0002397 (PMC2398778; doi:10.1371/journal.pone.0002397)
Supplement: Table S5 — Transcription factors differentially expressed after infection with TEV and TEV-At17. A. thaliana transcription factors and other transcription regulators were mainly downloaded from arabidopsis.med.ohio-state.edu/AtTFDB/index.jsp, and collapsed with the significantly up-regulated (Table S2) and down-regulated (Table S3) genes between TEV- and TEV-At17-infected plants, to generate a list of differentially expressed transcription factors. Mean and standard deviations are indicated for control, TEV- and TEV-At17-infected plants. (0.08 MB XLS) [file pone.0002397.s006.xls]

## Sheet: Transcription Regulators Up
Transcription factors and regulators, upregulated in TEV-At vs. TEV
Oligo ID	Gene AGI	GeneFamily	GeneName		Annotation		Mock Median	Mock Mean	Mock SD		TEV Median	TEV Mean	TEV SD		TEV-At Median	TEV-At Mean	TEV-At SD
A002839_01	At1g36060	AP2-EREBP	NA		AP2 domain-containing transcription factor, putative similar to AP2 domain transcription factor GI:4567204 from [Arabidopsis thaliana]		0	-0.191	0.798279		-0.298	-0.2288	0.199052		0.574	0.6046	0.236768
A017311_01	At5g13330	AP2-EREBP	NA		AP2 domain-containing transcription factor family protein similar to AP2 domain containing protein RAP2.6, Arabidopsis thaliana, EMBL:AF003099; contains Pfam profile PF00847: AP2 domain		0	0.0932	0.509844		1.082	0.7668	0.701005		1.802	1.8898	0.267181
A200509_01	At1g22985	AP2-EREBP	NA		AP2 domain-containing transcription factor, putative		0	-0.063	0.145657		-0.123	-0.022	0.154998		0.323	0.3448	0.141447
A007132_01	At2g21240	BBR/BPC	BBR/BPC4		expressed protein		0	0.0768	0.151515		0.191	0.205	0.152886		0.551	0.518	0.0740439
A008572_01	At2g42280	bHLH	AtbHLH130		basic helix-loop-helix (bHLH) family protein		0	-0.0068	0.0799231		-0.36	-0.3708	0.0979857		0.013	0.0224	0.161382
A003892_01	At1g09530	bHLH	AtbHLH8 PIF3		phytochrome interacting factor 3 (PIF3) identical to phytochrome interacting factor 3 (PIF3) GI:3929585 from [Arabidopsis thaliana]		0	-0.1312	0.469181		-0.751	-0.8554	0.310635		-0.279	-0.2436	0.134255
A008108_01	At2g43060	bHLH	AtbHLH158		expressed protein similar to cDNA bHLH transcription factor (bHLH zeta gene) GI:32563005		0	-0.1996	0.509458		-0.237	-0.1784	0.175791		0.258	0.3658	0.248673
A005226_01	At1g45249	bZIP	ABF2		ABA-responsive element-binding protein 1 (AREB1) identical to ABA-responsive element binding protein 1 (AREB1) [Arabidopsis thaliana] GI:9967417		0	-0.0346	0.281526		-1.259	-1.2256	0.100786		-0.709	-0.6778	0.101832
At30028708	At5g65210	bZIP	AtbZIP47 TGA1		bZIP family transcription factor (TGA1) identical to transcription factor (TGA1) GI:16550 from [Arabidopsis thaliana]		0	-0.005	0.0572975		-0.375	-0.3588	0.241464		0.35	0.3312	0.123542
A020589_01	At5g65210	bZIP	AtbZIP47 TGA1		bZIP family transcription factor (TGA1) identical to transcription factor (TGA1) GI:16550 from [Arabidopsis thaliana]		0	0.0074	0.0635594		-0.201	-0.1568	0.124929		0.414	0.3912	0.199061
A011743_01	At3g19290	bZIP	AtbZIP38 ABF4 AREB2		ABA-responsive element-binding protein 2 (AREB2) almost identical (one amino acid) to GB:AAF27182 from (Arabidopsis thaliana); contains Pfam profile PF00170:bZIP transcription factor; identical to cDNA abscisic acid responsive elements-binding factor (ABR		0	-0.0518	0.279878		-0.251	-0.3046	0.260886		0.26	0.2282	0.0995651
A014534_01	At4g34000	bZIP	AtbZIP37 ABF3 DPBF5		ABA-responsive element-binding protein / abscisic acid responsive elements-binding factor (ABRE) / ABA-responsive elements-binding factor (ABF3) identical to abscisic acid responsive elements-binding factor (ABF3) GI:6739280 from [Arabidopsis thaliana]; i		0	0.04	0.156951		-0.546	-0.698	0.247364		-0.262	-0.2712	0.190252
A200159_01	At5g39660	C2C2-Dof	NA		Dof-type zinc finger domain-containing protein similar to H-protein promoter binding factor-2a GI:3386546 from [Arabidopsis thaliana]		0	0.1462	0.527414		-0.402	-0.4045	0.199035		0.059	-0.0246	0.221367
A012866_01	At4g23450	C3H	NA		zinc finger (C3HC4-type RING finger) family protein contains Pfam profile: PF00097 zinc finger, C3HC4 type		0	0.108	0.345845		0.164	0.1768	0.142828		0.677	0.6254	0.139815
A023177_01	At5g08750	C3H	NA		zinc finger (C3HC4-type RING finger) family protein contains Pfam profile: PF00097 zinc finger, C3HC4 type (RING finger)		0	-0.1	0.255639		-0.079	-0.0422	0.123273		0.228	0.2406	0.0629706
A010743_01	At3g10810	C3H	NA		zinc finger (C3HC4-type RING finger) family protein contains Pfam profile: PF00097 Zinc finger, C3HC4 type (RING finger)		0	0.0152	0.410632		-0.461	-0.5152	0.264211		-0.041	-0.0498	0.152883
A016955_01	At5g38895	C3H	NA		zinc finger (C3HC4-type RING finger) family protein contains Pfam profile: PF00097 zinc finger, C3HC4 type (RING finger)		0	0.0388	0.136058		0.131	0.1746	0.128792		0.407	0.4516	0.097318
A004596_01	At1g68070	C3H	NA		zinc finger (C3HC4-type RING finger) family protein very low similarity to RING-H2 finger protein RHG1a [Arabidopsis thaliana] GI:3822225; contains Pfam profile: PF00097 zinc finger, C3HC4 type (RING finger)		0	0.0546	0.150221		0.109	0.0966	0.0772936		0.319	0.3214	0.0995153
At30027636	At5g55970	C3H	NA		zinc finger (C3HC4-type RING finger) family protein contains Pfam profile: PF00097 zinc finger, C3HC4 type (RING finger)		0	-0.1068	0.290261		-0.644	-0.5255	0.414165		0.073	-0.0176	0.168132
At30006698	At1g73950	C3H	NA		zinc finger (C3HC4-type RING finger) family protein contains Pfam profile: PF00097 zinc finger, C3HC4 type		0	-0.063	0.227941		-0.269	-0.3356	0.341217		0.165	0.1618	0.13774
A015776_01	At5g41350	C3H	NA		zinc finger (C3HC4-type RING finger) family protein contains Pfam profile: PF00097 zinc finger, C3HC4 type (RING finger)		0	-0.1006	0.235336		-0.016	-0.0664	0.292874		0.369	0.3406	0.0648637
A012079_01	At3g26730	C3H	NA		zinc finger (C3HC4-type RING finger) family protein contains Pfam profile: PF00097 zinc finger, C3HC4 type (RING finger)		0	0.1038	0.220766		-0.193	-0.2272	0.098103		0	-0.0176	0.0829325
A017717_01	At5g47610	C3H	NA		zinc finger (C3HC4-type RING finger) family protein contains Pfam profile: PF00097 zinc finger, C3HC4 type (RING finger)		0	0.31375	0.676711		-0.947	-1.01925	0.281333		-0.364	-0.2536	0.55612
A006794_01	At2g01060	G2-like	NA		myb family transcription factor contains Pfam profile: PF00249 myb-like DNA-binding domain		0	-0.0216	0.329826		0.058	0.0622	0.0784551		0.277	0.2854	0.0484076
At30014767	At3g24120	G2-like	NA		myb family transcription factor contains Pfam profile: PF00249 myb-like DNA-binding domain		0	0.1032	0.166545		0.109	0.072	0.150988		0.313	0.3246	0.0480292
A007852_01	At2g36340	GeBP	NA		DNA-binding storekeeper protein-related contains similarity to storekeeper protein [Solanum tuberosum] gi|14268476|emb|CAC39398; contains PF04504: Protein of unknown function, DUF573		0	-0.0972	0.199634		0.232	0.1546	0.306378		0.657	0.5976	0.0895087
A001247_01	At1g50420	GRAS	SCL3 AtGRAS-5		scarecrow-like transcription factor 3 (SCL3) identical to GB:AAD24404 GI:4580515 from [Arabidopsis thaliana] (Plant J. 18 (1), 111-119 (1999))		0	-0.023	0.150351		-0.134	-0.1556	0.191732		0.134	0.2128	0.1922
A008500_01	At2g35940	Homeobox-BEL	NA		homeodomain-containing protein contains 'Homeobox' domain signature, Prosite:PS00027		0	0.1218	0.303331		-0.238	-0.1714	0.158014		0.14	0.1596	0.0950542
A009205_01	At3g01470	Homeobox-HD-Zip I	Athb-1 HAT5		homeobox-leucine zipper protein 5 (HAT5) / HD-ZIP protein 5 / HD-ZIP protein (HB-1) identical to homeobox-leucine zipper protein HAT5 (HD-ZIP protein 5) (HD-ZIP protein ATHB-1) GB:Q02283 [Arabidopsis thaliana]		0	0.0188	0.349375		-0.04	-0.0548	0.144916		0.421	0.52	0.256775
A006975_01	At2g46680	Homeobox-HD-Zip I	Athb-7		homeobox-leucine zipper protein 7 (HB-7) / HD-ZIP transcription factor 7 identical to homeobox-leucine zipper protein ATHB-7 (HD-ZIP protein ATHB-7) (SP:P46897) [Arabidopsis thaliana];		0	-0.1416	0.341021		-1.329	-1.2468	0.190816		-0.576	-0.627	0.281928
A202027_01	At3g61890	Homeobox-HD-Zip I	Athb-12		homeobox-leucine zipper protein 12 (HB-12) / HD-ZIP transcription factor 12 identical to homeobox-leucine zipper protein ATHB-12 (GI:6899887) [Arabidopsis thaliana]		0	-0.0538	0.233275		-1.399	-1.3328	0.436608		-0.682	-0.6272	0.196771
A001103_01	At1g01060	MYB-CCA1-like	LHY		myb family transcription factor contains Pfam profile: PF00249 myb-like DNA-binding domain; identical to cDNA LATE ELONGATED HYPOCOTYL MYB transcription factor GI:3281845		0	0.0546	0.15059		-1.148	-1.1786	0.233238		-0.438	-0.3936	0.139953
A016545_01	At5g52660	MYB-CCA1-like	NA		myb family transcription factor contains PFAM profile: PF00249 myb-like DNA-binding domain		0	-0.029	0.112688		-0.227	-0.219	0.227636		0.278	0.2398	0.103938
A024781_01	At1g72650	MYB-TBP-like	NA		myb family transcription factor contains Pfam PF00249: Myb-like DNA-binding domain		0	-0.0366	0.199992		-0.213	-0.2476	0.154657		0.073	0.0668	0.0707404
A001495_01	At1g52890	NAC	ANAC019		no apical meristem (NAM) family protein contains Pfam PF02365: No apical meristem (NAM) domain; similar to NAM (no apical meristem) GB:CAA63101 from [Petunia x hybrida]		0	-0.2218	0.571939		-0.231	-0.2742	0.244157		0.643	0.658	0.0818138
A016324_01	At5g39610	NAC	NA		no apical meristem (NAM) family protein contains Pfam PF02365 : No apical meristem (NAM) protein; similar to cup-shaped cotyledon CUC2 (GI:1944132) [Arabidopsis thaliana]		0	-0.1018	0.285832		-0.976	-0.9844	0.154933		-0.181	-0.1272	0.236936
A020350_01	At3g15500	NAC	AtNAC3		no apical meristem (NAM) family protein (NAC3) identical to AtNAC3 [Arabidopsis thaliana] GI:12060424; contains Pfam PF02365: No apical meristem (NAM) domain; similar to jasmonic acid 2 GB:AAF04915 from [Lycopersicon esculentum]		0	-0.0865	0.351186		-0.302	-0.3774	0.236271		0.839	0.6674	0.304986
A008873_01	At3g04070	NAC	NA		no apical meristem (NAM) family protein contains Pfam PF02365: No apical meristem (NAM) domain; similar to NAM GB:CAA63101 [Petunia x hybrida]		0	-0.0796	0.442485		0.748	0.4618	0.654448		2.189	2.0522	0.358484
A001155_01	At1g69490	NAC	NAP		no apical meristem (NAM) family protein similar to N-term half of NAC domain protein NAM [Arabidopsis thaliana] GI:4325282		0	0.03	0.0604152		-0.736	-0.7466	0.122743		-0.324	-0.284	0.138993
A200110_01	At4g27410	NAC	RD26		no apical meristem (NAM) family protein (RD26) contains Pfam PF02365: No apical meristem (NAM) domain; Arabidopsis thaliana nap gene,PID:e1234813; identical to cDNA RD26 mRNA for NAM-like protein GI:15375403		0	-0.0774	0.302702		-0.526	-0.4836	0.21428		0.225	0.1886	0.212068
At30024512	At5g22290	NAC	NA		no apical meristem (NAM) family protein contains Pfam PF02365: No apical meristem (NAM) domain		0	0.158	0.295318		-0.389	-0.5032	0.290975		-0.037	-0.0628	0.149336
A010057_01	At3g29035	NAC	NA		no apical meristem (NAM) family protein contains Pfam PF02365 : No apical meristem (NAM) protein; similar to cup-shaped cotyledon CUC2 (GI:1944132) [Arabidopsis thaliana]		0	-0.0124	0.200076		-0.353	-0.4928	0.427281		-0.019	0.27	0.45582
A000061_01	At1g76590	PLATZ (Zn)			zinc-binding family protein similar to zinc-binding protein [Pisum sativum] GI:16117799; contains Pfam profile PF04640 : Protein of unknown function, DUF597		0	0.0048	0.238893		0.629	0.701	0.352099		1.26	1.3472	0.284922
A020952_01	At1g22640	R2R3-MYB	AtMYB3		myb family transcription factor (MYB4) similar to myb-related protein GI:1020155 from [Arabidopsis thaliana]		0	-0.113	0.32183		-0.721	-0.742	0.179161		-0.357	-0.3516	0.0638772
At30028076	At5g59780	R2R3-MYB	AtMYB59		myb family transcription factor (MYB59) contains PFAM profile: myb DNA binding domain PF00249		0	0.0234	0.138922		-0.66	-0.7026	0.357072		-0.013	-0.107	0.229623
At30010676	At2g36080	RAV	NA		DNA-binding protein, putative strong similarity to DNA-binding proteins from [Arabidopsis thaliana] RAV1 GI:3868857, RAV2 GI:3868859; contains Pfam profile PF02362: B3 DNA binding domain		0	0.3192	0.552774		1.014	1.0836	0.49721		1.787	1.843	0.193405
At30010674	At2g36080	RAV	NA		DNA-binding protein, putative strong similarity to DNA-binding proteins from [Arabidopsis thaliana] RAV1 GI:3868857, RAV2 GI:3868859; contains Pfam profile PF02362: B3 DNA binding domain		0	0.047	0.442513		0.457	0.471	0.502299		1.248	1.361	0.459959
A003671_01	At1g13450	Trihelix	GT-1		DNA binding protein GT-1 identical to DNA binding protein GT-1 GI:598073 from [Arabidopsis thaliana]		0	-0.0646	0.116401		-0.128	-0.1482	0.200445		0.143	0.1418	0.0480281
A006379_01	At2g02740	WHIRLY	T20F6.12 AtWHY3		transcription factor, putative similar to DNA-binding protein p24 [Solanum tuberosum] GI:9651810, Plant Transcriptional Regulator Pbf-2 [Solanum tuberosum] (GI:21730639, GI:21730638, GI:21730640, GI:21730637)		0	0.0624	0.284298		0.15	0.0765	0.216411		0.4	0.4282	0.149394
At30001496	At1g13960	WRKY	AtWRKY4		WRKY family transcription factor similar to WKRY DNA-binding protein GB:AAD17441		0	-0.27675	0.738042		-0.148	-0.13025	0.104955		0.412	0.4138	0.249201
A009836_01	At3g01970	WRKY	AtWRKY45		WRKY family transcription factor similar to WRKY1 GB:AAC49527 [Petroselinum crispum]		0	0.1154	0.284262		-0.083	0.1794	0.558719		1.22	1.1736	0.21466
At30022968	At5g07100	WRKY	AtWRKY26		WRKY family transcription factor SPF1 protein - Ipomoea batatas (sweet potato), PIR:S51529		0	-0.1616	0.478315		0.206	0.1898	0.314988		0.75	0.8108	0.172594
A017767_01	At5g13080	WRKY	AtWRKY75		WRKY family transcription factor WRKY DNA binding protein - Solanum tuberosum, EMBL:AJ278507		0	0.083	0.59412		1.124	1.2396	0.675966		2.411	2.4136	0.33413
At30022967	At5g07100	WRKY	AtWRKY26		WRKY family transcription factor SPF1 protein - Ipomoea batatas (sweet potato), PIR:S51529		0	-0.1166	0.316706		-0.135	-0.0972	0.184681		0.378	0.3044	0.223134

## Sheet: Transcription Regulators Down
							Transcription factors and regulators, Downregulated in TEV-At vs. TEV
Oligo ID	Gene AGI	GeneFamily	GeneName		Annotation		Mock Median	Mock Mean	Mock SD		TEV Median	TEV Mean	TEV SD		TEV-At Median	TEV-At Mean	TEV-At SD
A024560_01	At5g61600	AP2-EREBP	NA		ethylene-responsive element-binding family protein contains similarity to ethylene responsive element binding factor 5 (AtERF5) (Swiss-Prot:O80341) [Arabidopsis thaliana]; contains Pfam PF00847: AP2 domain		0	0.0638	0.52026		1.337	1.302	0.339771		-0.106	-0.0086	0.333795
A008698_01	At2g44840	AP2-EREBP	AtERF13		ethylene-responsive element-binding protein, putative		0	0.2285	0.625929		0.573	0.5214	0.263633		-0.056	-0.05	0.245082
A005935_01	At3g15210	AP2-EREBP	AtERF4 Rap2.5		ethylene-responsive element-binding factor 4 (ERF4) identical to ethylene responsive element binding factor 4 SP:O80340 from [Arabidopsis thaliana]		0	0.0738	0.280667		1.266	1.2634	0.457297		-0.207	0.2072	0.740493
A020136_01	At3g20310	AP2-EREBP	NA		ethylene-responsive element-binding family protein similar to SP|O80339 Ethylene responsive element binding factor 3 (AtERF3) {Arabidopsis thaliana}; contains Pfam profile PF00847: AP2 domain		0	-0.0016	0.229487		0.043	0.1314	0.1673		-0.271	-0.1758	0.206817
A021347_01	At5g07580	AP2-EREBP	NA		ethylene-responsive element-binding family protein contains similarity to ethylene responsive element binding factor 5 (AtERF5) (Swiss-Prot:O80341) [Arabidopsis thaliana]; contains Pfam PF00847: AP2 domain		0	0.0382	0.23492		0.137	0.1216	0.20543		-0.454	-0.4488	0.123554
A008346_01	At2g23340	AP2-EREBP	NA		AP2 domain-containing transcription factor, putative		0	-0.1086	0.19497		-0.026	0.1094	0.345544		-0.334	-0.3492	0.122469
At30027099	At5g51190	AP2-EREBP	NA		AP2 domain-containing transcription factor, putative contains similarity to ethylene responsive element binding factor		0	0.1586	0.436629		1.748	1.5776	0.769958		-0.501	-0.4974	0.462619
A019034_01	At5g47220	AP2-EREBP	AtERF2		ethylene-responsive element-binding factor 2 (ERF2) identical to SP|O80338 Ethylene responsive element binding factor 2 (AtERF2) [Arabidopsis thaliana]		0	0.114	0.35179		1.182	0.9932	0.726918		-0.242	0.0184	0.544921
A018150_01	At5g25190	AP2-EREBP	NA		ethylene-responsive element-binding protein, putative ethylene responsive element binding protein homolog, Stylosanthes hamata, EMBL:U91857		0	-0.0872	0.277154		-0.885	-0.8822	0.12014		-1.583	-1.6432	0.160938
A017262_01	At5g44210	AP2-EREBP	NA		ERF domain protein 9 (ERF9) identical to ERF domain protein 9 GI:11414988 from [Arabidopsis thaliana]		0	0.1186	0.337178		-0.265	-0.149	0.298474		-0.694	-0.7336	0.10262
A003712_01	At1g28370	AP2-EREBP	NA		ERF domain protein 11 (ERF11) identical to ERF domain protein 11 (AtERF11) GI:15207789 from [Arabidopsis thaliana]		0	0.0278	0.34271		1.866	1.7848	0.818501		0.035	0.5242	0.942022
A019736_01	At5g47230	AP2-EREBP	AtERF5		ethylene-responsive element-binding factor 5 (ERF5) identical to SP|O80341 Ethylene responsive element binding factor 5 (AtERF5) [Arabidopsis thaliana]		0	0.0624	0.452118		1.222	1.0132	0.504228		-0.245	-0.3066	0.295871
A019888_01	At2g44940	AP2-EREBP	NA		AP2 domain-containing transcription factor TINY, putative similar to transcription factor TINY (GI:1246403) [Arabidopsis thaliana]; contains pFAM domain (PF00847)		0	-0.0446	0.289743		-0.836	-0.8182	0.488927		-1.67	-1.7138	0.270082
A010345_01	At3g43240	ARID	NA		ARID/BRIGHT DNA-binding domain-containing protein contains Pfam profile PF01388: ARID/BRIGHT DNA binding domain		0	0.1364	0.263014		0.205	0.247	0.214419		-0.095	-0.0608	0.123463
At30016136	At3g48100	ARR-B	NA		two-component responsive regulator / response regulator 5 (ARR5) / response reactor 2 (RR2) identical to responce reactor2 (AtRR2) [Arabidopsis thaliana] GI:3273198, response regulator 5 (ARR5) [Arabidopsis thaliana] GI:3953599; contains Pfam profile: PF0		0	-0.0242	0.232322		0.379	0.3202	0.198836		-0.233	-0.344	0.421907
A024273_01	At1g04240	Aux/IAA			auxin-responsive protein / indoleacetic acid-induced protein 3 (IAA3) identical to SP|Q38822 Auxin-responsive protein IAA3 (Indoleacetic acid-induced protein 3) {Arabidopsis thaliana}; EST gb|T04296 comes from this gene		0	-0.1232	0.253335		0.176	0.1524	0.24586		-0.693	-0.8912	0.352706
At30025808	At5g39860	bHLH	AtbHLH136		bHLH protein putative DNA-binding protein - Arabidopsis thaliana, EMBL:AC011765		0	-0.016	0.127611		-0.804	-0.703	0.29396		-1.179	-1.255	0.161082
A009752_01	At3g07340	bHLH	AtbHLH62		basic helix-loop-helix (bHLH) family protein contains Pfam profile: PF00010 helix-loop-helix DNA-binding domain		0	0.0898	0.395439		0.07	0.0806	0.377528		-0.481	-0.463	0.170488
A015345_01	At4g00870	bHLH	AtbHLH14		basic helix-loop-helix (bHLH) family protein similar to the myc family of helix-loop-helix transcription factors; contains Pfam profile PF00010: Helix-loop-helix DNA-binding domain; PMID: 12679534		0	-0.1132	0.849363		-0.123	-0.0102	0.374884		-0.617	-0.5568	0.34502
A011732_01	At3g62420	bZIP	AtbZIP53		bZIP transcription factor family protein similar to common plant regulatory factor 6 GI:9650826 from [Petroselinum crispum]		0	-0.1394	0.306112		0.419	0.4398	0.159797		-0.027	-0.0516	0.188306
A006649_01	At2g22850	bZIP	AtbZIP6		bZIP transcription factor family protein contains a bZIP transcription factor basic domain signature (PDOC00036)		0	-0.0406	0.0909164		-0.053	-0.0516	0.232615		-0.368	-0.5322	0.292266
At30011420	At2g42380	bZIP	AtbZIP34		bZIP transcription factor family protein		0	0.0462	0.340534		0.251	0.0662	0.391598		-0.75	-0.8174	0.220274
A015903_01	At5g54470	C2C2-CO-like	NA		zinc finger (B-box type) family protein similar to unknown protein (pir||T05755)		0	0.0014	0.395447		0.391	0.4398	0.241468		0.116	0.026	0.214806
A009681_01	At3g21150	C2C2-CO-like	NA		zinc finger (B-box type) family protein contains Pfam profile:PF01760 CONSTANS family zinc finger		0	-0.0454	0.454547		1.114	0.7452	0.872695		-1.059	-0.9822	0.576861
A003532_01	At1g64620	C2C2-Dof	NA		Dof-type zinc finger domain-containing protein similar to Dof zinc finger protein GB:CAA08755 GI:3341468 from [Nicotiana tabacum]		0	-0.0418	0.22927		-0.213	-0.191	0.106858		-0.418	-0.37475	0.154881
A004777_01	At1g51700	C2C2-Dof	ADOF1		Dof-type zinc finger domain-containing protein (ADOF1) identical to cDNA adof1 mRNA for dof zinc finger protein, GI:3608260; contains Pfam profile PF02701: Dof domain, zinc finger		0	0.0688	0.235781		0.647	0.507	0.400296		-0.399	-0.34	0.373704
A011740_01	At3g54810	C2C2-Gata	GATA-8		zinc finger (GATA type) family protein GATA transcription factor 3, Arabidopsis thaliana, Y13650		0	-0.0332	0.298521		1.098	1.097	0.224017		0.211	0.3694	0.546258
A012672_01	At3g52800	C2H2	NA		zinc finger (AN1-like) family protein contains Pfam domain, PF01428: AN1-like Zinc finger		0	-0.0102	0.179663		0.532	0.5586	0.357456		-0.086	-0.0244	0.141571
A018994_01	At5g67450	C2H2	AZF1		zinc finger (C2H2 type) protein 1 (AZF1) identical to Cys2/His2-type zinc finger protein 1 [Arabidopsis thaliana] gi|6009887|dbj|BAA85108		0	0.065	0.479926		1.176	1.0764	0.517661		0.123	0.2218	0.229124
A201517_01	At2g41835	C2H2	NA		zinc finger (C2H2 type, AN1-like) family protein contains Pfam domain, PF00096: Zinc finger, C2H2 type; contains Pfam domain, PF01428: AN1-like Zinc finger		0	-0.013	0.412884		1.367	1.0522	0.85389		-0.388	-0.2062	0.558324
A005576_01	At1g75710	C2H2	NA		zinc finger (C2H2 type) family protein contains zinc finger, C2H2 type, domain, PROSITE:PS00028		0	-0.0676	0.20714		-0.49	-0.482	0.235738		-1	-1.0546	0.103621
A024557_01	At1g27730	C2H2	ZAT10		zinc finger (C2H2 type) family protein (ZAT10) / salt-tolerance zinc finger protein (STZ) identical to salt-tolerance zinc finger protein GB:CAA64820 GI:1565227 from [Arabidopsis thaliana]; contains Pfam domain, PF00096: Zinc finger, C2H2 type; identical		0	0.0882	0.360699		2.646	2.3256	1.04334		0.272	0.4648	0.650991
A016673_01	At5g54630	C2H2	NA		zinc finger protein-related contains Prosite:PS00028 Zinc finger, C2H2 type, domain		0	-0.1056	0.29663		-0.507	-0.5084	0.145048		-0.942	-0.8888	0.119711
At30023505	At5g12330	C2H2	LRP1		lateral root primordium 1 (LRP1) identical to lateral root primordium 1 (LRP1) [Arabidopsis thaliana] GI:882341; contains Pfam profile PF05142: Domain of unknown function (DUF702)		0	0.0238	0.135143		0.425	0.3584	0.249131		-0.203	-0.0726	0.306997
A200032_01	At1g70790	C2H2	NA		C2 domain-containing protein similar to zinc finger and C2 domain protein GI:9957238 from [Arabidopsis thaliana]		0	0.0878	0.373024		0.422	0.4432	0.239461		0.168	0.1432	0.055206
A016839_01	At5g57520	C2H2	ZFP2		zinc finger (C2H2 type) family protein (ZFP2) identical to zinc finger protein 2 (ZFP2) GI:790674 from [Arabidopsis thaliana]; contains Pfam domain, PF00096: Zinc finger, C2H2 type		0	0.114	0.30935		-0.065	-0.0154	0.37277		-0.653	-0.61975	0.391244
A004978_01	At5g04340	C2H2	NA		zinc finger (C2H2 type) family protein contains Pfam domain, PF00096: Zinc finger, C2H2 type		0	-0.2274	0.634392		0.511	0.4054	0.815176		-0.73	-0.5556	0.258947
A024469_01	At5g59820	C2H2	ZAT12		zinc finger (C2H2 type) family protein (ZAT12) identical to zinc finger protein ZAT12 [Arabidopsis thaliana] gi|1418325|emb|CAA67232		0	0.0074	0.684991		1.983	2.3426	0.821441		1.09	1.2364	0.442405
At30006958	At1g76410	C3H	NA		zinc finger (C3HC4-type RING finger) family protein contains Pfam domain, PF00097: Zinc finger, C3HC4 type (RING finger)		0	0.0444	0.383522		-0.312	-0.4088	0.226878		-0.881	-0.8556	0.236443
A022269_01	At5g10380	C3H	NA		zinc finger (C3HC4-type RING finger) family protein contains Pfam profile: PF00097 zinc finger, C3HC4 type (RING finger)		0	0.0398	0.0981336		1.005	0.9098	0.154239		0.603	0.5488	0.204785
A017094_01	At5g59000	C3H	NA		zinc finger (C3HC4-type RING finger) family protein contains Pfam profile: PF00097 zinc finger, C3HC4 type (RING finger) ;contains PROSITE PS00190: Cytochrome c family heme-binding site signature		0	-0.017	0.241555		0.108	0.0972	0.188012		-0.633	-0.4956	0.245458
A003645_01	At1g20823	C3H	NA		zinc finger (C3HC4-type RING finger) family protein contains Pfam domain, PF00097: Zinc finger, C3HC4 type (RING finger)		0	-0.2082	0.596996		0.326	0.2536	0.288066		-0.634	-0.7832	0.311534
A015908_01	At5g63780	C3H	NA		zinc finger (C3HC4-type RING finger) family protein contains Pfam profile: PF00097 zinc finger, C3HC4 type (RING finger)		0	0.0718	0.336041		-0.015	-0.0128	0.220228		-0.423	-0.5262	0.229708
A015662_01	At5g38140	CCAAT-HAP5	NA		histone-like transcription factor (CBF/NF-Y) family protein similar to CCAAT-binding transcription factor subunit AAB-1 (GI:2583171) [Neurospora crassa]; contains a CBF/NF-Y subunit signature (PDOC00578) presernt in members of histone-like transcription f		0	0.0428	0.106947		-0.523	-0.4982	0.0613042		-0.696	-0.7278	0.136575
A016644_01	At5g18240	G2-like	NA		myb family transcription factor contains Pfam profile: PF00249 myb-like DNA-binding domain		0	0.0884	0.179436		-0.101	-0.1362	0.286699		-0.762	-0.7526	0.135308
A020239_01	At5g59450	GRAS	SCL11 AtGRAS-31		scarecrow-like transcription factor 11 (SCL11) scarecrow-like 11, Arabidopsis thaliana, EMBL:AF036307		0	0.0562	0.244815		0.869	0.6596	0.355962		-0.05	0.0558	0.368376
A014794_01	At4g17230	GRAS	SCL13 AtGRAS-24		scarecrow-like transcription factor 13 (SCL13)		0	-0.056	0.342572		0.41	0.4524	0.103495		0.028	0.0894	0.252823
A000259_01	At1g66350	GRAS	RGL1		gibberellin regulatory protein (RGL1) similar to GB:CAA75492 from [Arabidopsis thaliana]; contains Pfam profile PF03514: GRAS family transcription factor; identical to cDNA RGL1 protein GI:15777856, RGL1 protein [Arabidopsis thaliana] GI:15777857		0	0.0006	0.237589		0.015	0.0514	0.204282		-0.574	-0.58275	0.432798
At30026756	At5g48150	GRAS	PAT1		phytochrome A signal transduction 1 (PAT1)		0	0.0098	0.0569798		-0.138	-0.2406	0.189263		-0.575	-0.592	0.137661
A004632_01	At1g07520	GRAS	NA		scarecrow transcription factor family protein similar to GB:AAD24412 from [Arabidopsis thaliana] (Plant J. 18 (1), 111-119 (1999)); contains Pfam profile: PF03514 GRAS family transcription factor		0	-0.02475	0.202174		0.58	0.3626	0.341548		-0.227	-0.1728	0.178717
At30015970	At3g46600	GRAS	AtGRAS-17		scarecrow transcription factor family protein scarecrow-like 11 - Arabidopsis thaliana, EMBL:AF036307		0	-0.0792	0.411777		0.33	0.346	0.239025		-0.262	-0.1942	0.288058
A020016_01	At4g17460	Homeobox-HD-Zip II	HAT1		homeobox-leucine zipper protein 1 (HAT1) / HD-ZIP protein 1 identical to Homeobox-leucine zipper protein HAT1 (SP:P46600) [Arabidopsis thaliana]		0	-0.0322	0.146684		0	-0.1142	0.187887		-1.11	-1.1986	0.191688
At30022925	At5g06710	Homeobox-HD-Zip II	HAT14		homeobox-leucine zipper protein 14 (HAT14) / HD-ZIP protein 14 contains similarity to homeodomain leucine zipper protein		0	0.055	0.147506		-0.258	-0.184	0.177216		-0.779	-0.742	0.244107
At30017576	At3g61150	Homeobox-HD-Zip IV	HD-GL2-1		homeobox-leucine zipper family protein / homeodomain GLABRA2 like protein 1 (HD-GL2-1) similar to Anthocyaninless2 (ANL2) (GP:5702094) Arabidopsis thaliana, EMBL:AF077335		0	-0.049	0.229339		0.407	0.5722	0.295472		-0.119	-0.0422	0.237119
A005229_01	At2g17950	Homeobox-WOX	WUSCHEL		homeodomain transcription factor (WUSCHEL) 99.4% identical to WUSCHELL (GI:4090200) [Arabidopsis thaliana]		0	-0.0458	0.154495		0.212	0.263	0.282828		-0.134	-0.159	0.0825863
A003719_01	At1g67970	HSF	HSFA8		heat shock factor protein, putative (HSF5) / heat shock transcription factor, putative (HSTF5) identical to heat shock transcription factor 5 (HSF5) SP:Q9S7U5 from [Arabidopsis thaliana]; contains Pfam profile: PF00447 HSF-type DNA-binding domain		0	0.0204	0.296922		1.452	1.3368	0.263911		0.621	0.6458	0.259057
A013399_01	At4g11660	HSF	HSFB2B HSF7		heat shock factor protein 7 (HSF7) / heat shock transcription factor 7 (HSTF7) identical to heat shock factor protein 7 (HSF7) SP:Q9T0D3 from [Arabidopsis thaliana]		0	-0.1408	0.371426		-0.121	-0.0636	0.155701		-0.545	-0.5224	0.127853
A200618_01	At1g33070	MADS-Type I	NA		hypothetical protein		0	0.0844	0.434755		0.371	0.5066	0.341568		-0.364	-0.2044	0.456423
At30007768	At2g03710	MADS-Type II	AGL3 SEP4		MADS-box protein (AGL3)		0	0.1682	0.334181		-0.193	-0.2696	0.195979		-0.953	-0.9086	0.136972
At30007767	At2g03710	MADS-Type II	AGL3 SEP4		MADS-box protein (AGL3)		0	-0.0574	0.127794		-0.567	-0.529	0.291753		-1.154	-1.1948	0.127721
A006039_01	At2g03710	MADS-Type II	AGL3 SEP4		MADS-box protein (AGL3)		0	0.0548	0.256304		-0.274	-0.419	0.374645		-0.992	-0.9918	0.180106
A015591_01	At5g15800	MADS-Type II	AGL2 SEP1		developmental protein SEPALLATA1 / floral homeotic protein (AGL2) (SEP1) identical to developmental protein SEPALLATA1 / floral homeotic protein (AGL2 / SEP1) SP:P29382 from [Arabidopsis thaliana]		0	-0.1728	0.321244		-0.079	-0.1406	0.343332		-0.697	-0.824	0.249876
A004579_01	At1g75250	MYB-I-box-binding-like	NA		myb family transcription factor contains PFAM profile: PF00249 myb-like DNA binding domain		0	-0.0734	0.187256		-0.492	-0.2184	0.639437		-1.029	-1.2344	0.474764
A016473_01	At5g01200	MYB-R-R-type	NA		myb family transcription factor contains PFAM profile: PF00249 myb-like DNA binding domain		0	0.04225	0.157804		0.117	0.2726	0.464033		-0.36	-0.4362	0.219674
A016356_01	At5g58900	MYB-R-R-type	NA		myb family transcription factor contains Pfam profile: PF00249 myb-like DNA-binding domain		0	0.0692	0.22068		-0.727	-0.7832	0.336319		-1.255	-1.261	0.131968
At30013264	At3g11280	MYB-R-R-type	NA		myb family transcription factor contains Pfam profile: PF00249 Myb-like DNA-binding domain		0	-0.104	0.259179		-0.213	-0.0248	0.446991		-0.86	-0.7414	0.321866
A015923_01	At5g24590	NAC	TIP		turnip crinkle virus-interacting protein / TCV-interacting protein (TIP) contains Pfam PF02365: No apical meristem (NAM) domain; similar to NAC2 (GI:6456751) {Arabidopsis thaliana}; identical to cDNA TIP mRNA, GI:9408600		0	0.1062	0.259318		0.976	1.043	0.476705		0.188	0.3416	0.41155
A008933_01	At3g49530	NAC	NA		no apical meristem (NAM) family protein contains Pfam PF02365: No apical meristem (NAM) domain; similar to NAC2 - Arabidopsis thaliana, EMBL:AF201456		0	0.0028	0.366902		0.707	0.921	0.524572		-0.038	0.14	0.46448
A007004_01	At2g02450	NAC	NA		no apical meristem (NAM) family protein contains Pfam PF02365: No apical meristem (NAM) domain		0	0.0576	0.376218		-0.223	-0.1402	0.243848		-0.563	-0.5834	0.251981
At30007644	At2g02450	NAC	NA		no apical meristem (NAM) family protein contains Pfam PF02365: No apical meristem (NAM) domain		0	0.0524	0.303277		0.141	0.0864	0.432402		-0.511	-0.5562	0.145611
At30007643	At2g02450	NAC	NA		no apical meristem (NAM) family protein contains Pfam PF02365: No apical meristem (NAM) domain		0	-0.025	0.375973		0.004	-0.0006	0.419878		-0.593	-0.6322	0.138695
A005712_01	At4g38620	R2R3-MYB	AtMYB4		myb family transcription factor (MYB4) contains Pfam profile: PF00249 myb-like DNA-binding domain		0	0.0826	0.180914		-0.056	-0.0402	0.216934		-1.133	-1.1156	0.201162
A011001_01	At3g23250	R2R3-MYB	AtMYB15		myb family transcription factor (MYB15) similar to myb-related transcription factor GB:CAA66952 from [Lycopersicon esculentum]		0	-0.0146667	0.570142		3.185	3.1084	1.20076		1.162	1.0272	0.734636
At30021938	At4g37260	R2R3-MYB	AtMYB73		myb family transcription factor (MYB73) contains Pfam profile: PF00249 myb-like DNA-binding domain		0	-0.0004	0.357089		0.657	0.7514	0.198064		0.206	0.2604	0.259099
A011689_01	At3g50060	R2R3-MYB	AtMYB77		myb family transcription factor contains Pfam profile: PF00249 myb-like DNA-binding domain; identical to cDNA MYB-related protein (1107 bp) GI:1263096		0	0.0434	0.292609		1.018	1.0252	0.565413		-0.482	-0.3812	0.504543
A003890_01	At1g18570	R2R3-MYB	AtMYB51		myb family transcription factor (MYB51) contains PFAM profile: PF00249		0	-0.1754	0.303422		1.661	1.3906	0.575993		0.4	0.4588	0.390413
A006108_01	At2g39880	R2R3-MYB	AtMYB25		myb family transcription factor (MYB25) contains Pfam profile: PF00249 myb-like DNA-binding domain		0	0.1192	0.42781		-0.121	-0.1026	0.187077		-0.704	-0.6162	0.201043
At30023788	At5g15310	R2R3-MYB	AtMYB16		myb family transcription factor contains PFAM profile: myb DNA-binding domain PF00249		0	-0.0096	0.15476		-0.437	-0.424	0.285723		-0.901	-0.8924	0.184112
A019826_01	At2g47070	SBP	SPL1		squamosa promoter-binding protein-like 1 (SPL1) identical to squamosa promoter binding protein-like 1 [Arabidopsis thaliana] GI:5931655; contains Pfam profile PF03110: SBP domain		0	0.0286	0.177703		0.235	0.246	0.0439488		-0.017	0.0116	0.0470563
A003863_01	At1g53230	TCP	TCP3		TCP family transcription factor 3 (TCP3) identical to transcription factor 3 (TCP3) [Arabidopsis thaliana] (GI:3243274); similar to flower development protein cycloidea (cyc3) GI:6358611 from [Misopates orontium]		0	0.129	0.286794		0.582	0.5526	0.0909687		0.086	0.1314	0.143209
At30021262	At4g31550	WRKY	AtWRKY11		WRKY family transcription factor contains Pfam profile: PF03106 WRKY DNA -binding domain		0	0.0026	0.333607		-0.139	-0.042	0.343283		-0.597	-0.6198	0.275617
At30021264	At4g31550	WRKY	AtWRKY11		WRKY family transcription factor contains Pfam profile: PF03106 WRKY DNA -binding domain		0	0.0526	0.211827		-0.243	-0.061	0.333629		-0.688	-0.622	0.269294
A202399_01	At4g23810	WRKY	AtWRKY53		WRKY family transcription factor AR411 - Arabidopsis thaliana (thale cress), PID:g1669603		0	0.1178	0.530515		1.446	1.3312	0.521559		0.61	0.6016	0.330294
A006343_01	At2g38470	WRKY	AtWRKY33		WRKY family transcription factor contains Pfam profile: PF03106 WRKY DNA -binding domain;		0	-0.0456	0.446372		1.034	0.8164	0.517545		-0.353	-0.2222	0.454164
At30011878	At2g46400	WRKY	AtWRKY46		WRKY family transcription factor		0	-0.0572	0.23929		1.485	1.3094	0.631414		0.072	0.0788	0.484091
A007996_01	At2g24570	WRKY	AtWRKY17		WRKY family transcription factor identical to WRKY transcription factor 17 GI:15991743 from [Arabidopsis thaliana]		0	-0.0216	0.352611		0.146	0.2472	0.263322		-0.394	-0.3562	0.211633
At30007470	At1g80840	WRKY	AtWRKY40		WRKY family transcription factor similar to WRKY transcription factor GB:BAA87058 GI:6472585 from [Nicotiana tabacum]		0	-0.0434	0.365655		1.833	1.7296	0.839336		-0.386	0.1442	0.968861
A019964_01	At1g74660	ZF-HD	MIF1		zinc finger homeobox family protein / ZF-HD homeobox family protein contains Pfam PF04770: ZF-HD protein dimerisation region; contains TIGRFAM TIGR01566: ZF-HD homeobox protein Cys/His-rich dimerization domain; similar to ZF-HD homeobox protein (GI:133740		0	-0.0482	0.329858		0.082	0.1576	0.468358		-0.784	-0.6472	0.338071
A008872_01	At3g28920	ZF-HD	Athb-34		zinc finger homeobox family protein / ZF-HD homeobox family protein contains Pfam PF04770: ZF-HD protein dimerisation region; contains Pfam TIGR01566: ZF-HD homeobox protein Cys/His-rich domain; contains TIGRFAM TIGR01565: homeobox domain, ZF-HD class; si		0	-0.0506	0.185551		0.153	0.2292	0.146273		0.032	0.0226	0.0308107
